# Supplementary material for: Deep-learning-derived glaucoma-related endophenotypes enable novel genome-wide genetic and functional discovery
Source: Research Square preprint supplement (doi:10.21203/rs.3.rs-8311177/v1), 2026-01-22

# auto\_GCC\_q0, 17:79614932\_TTAAC\_T

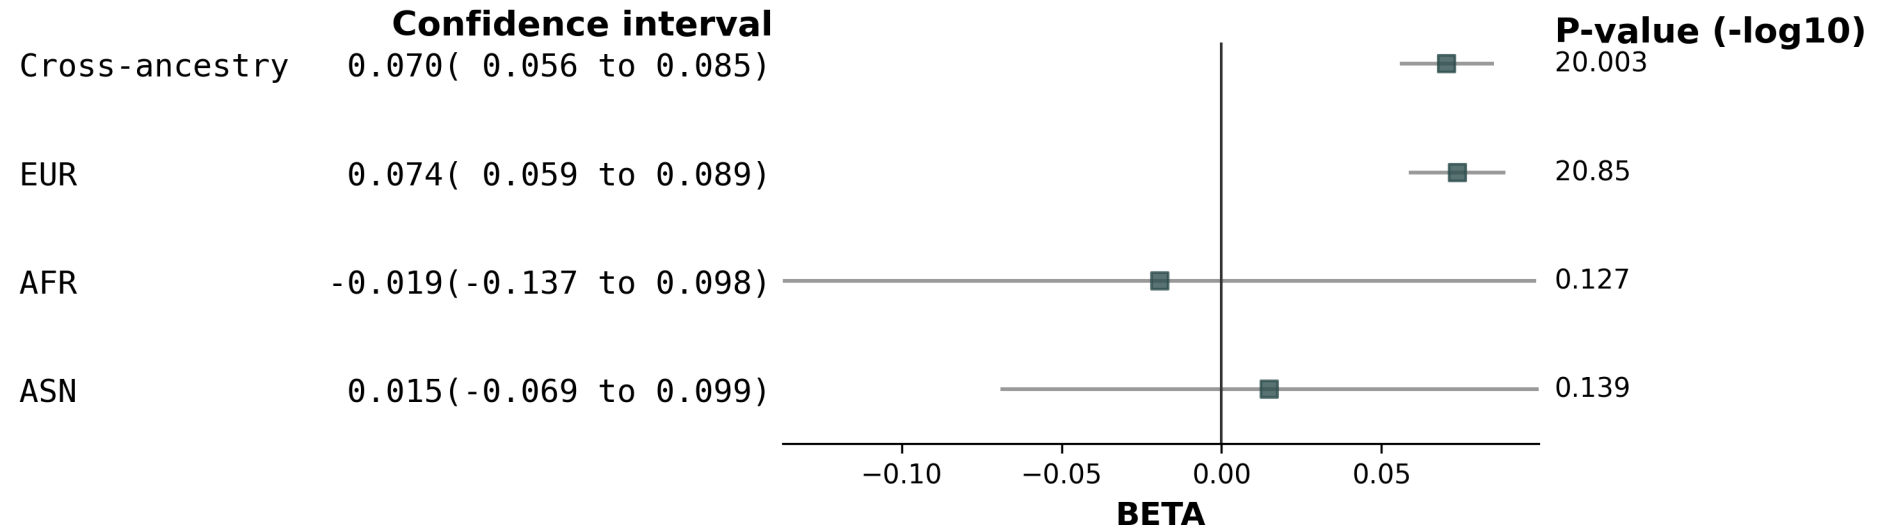

# auto\_GCC\_q0, rs11150797

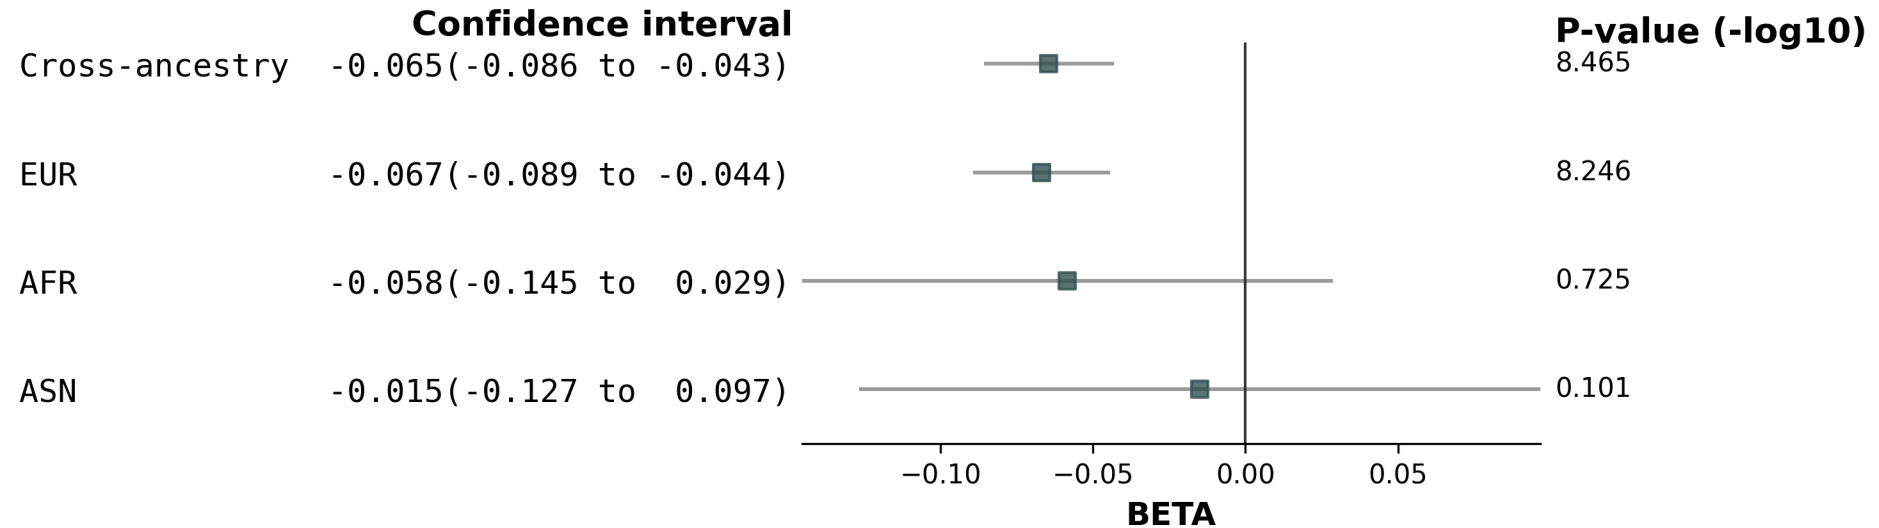

# auto\_GCC\_q2, rs3790909

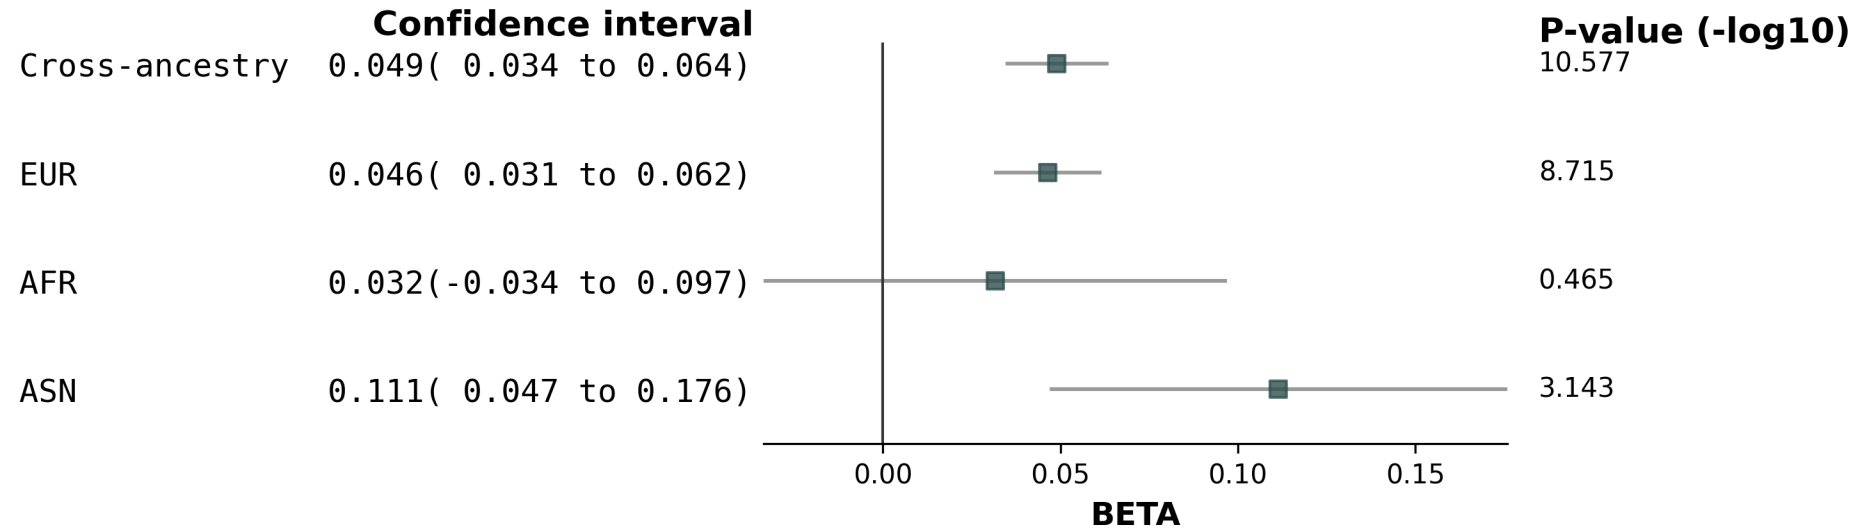

# auto\_GCC\_q2, rs33912345

**Confidence interval**

**P-value (-log10)**

Cross-ancestry

-0.039 (-0.053 to -0.024)

6.834

EUR

-0.045 (-0.060 to -0.030)

8.33

AFR

-0.000 (-0.117 to 0.116)

0.001

ASN

0.056 (-0.007 to 0.119)

1.079

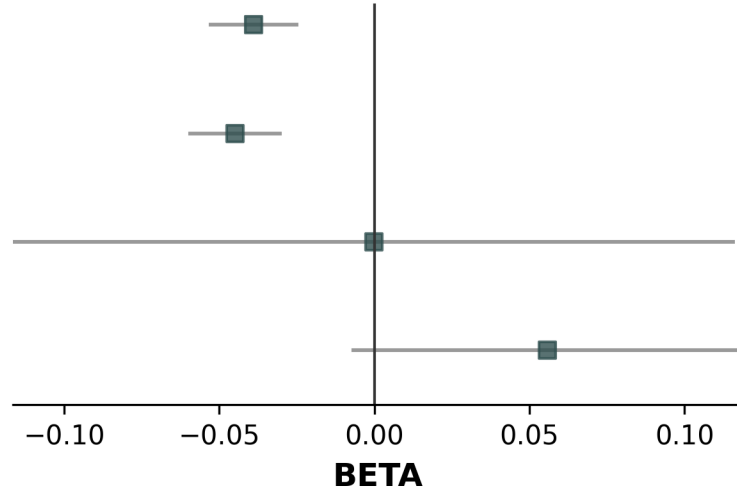



# auto\_GCC\_q2, rs35045925

**Confidence interval**

**P-value (-log10)**

Cross-ancestry

-0.054 (-0.073 to -0.036)

8.087

EUR

-0.058 (-0.078 to -0.038)

7.843

AFR

0.004 (-0.062 to 0.070)

0.043

ASN

-0.082 (-0.156 to -0.008)

1.524

-0.15

-0.10

-0.05

0.00

0.05

**BETA**

# auto\_GCC\_q3, 17:79614932\_TTAAC\_T

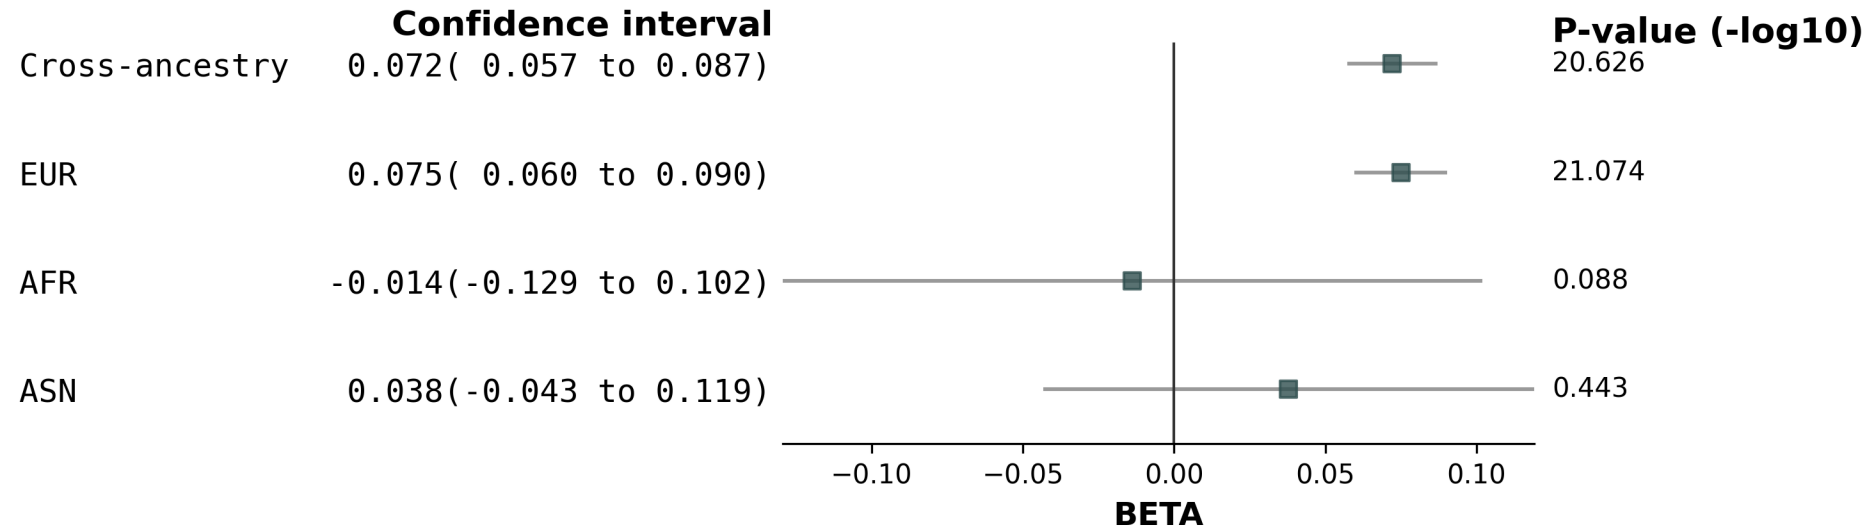

# auto\_GCC\_q3, rs1800407

**Confidence interval**

**P-value (-log10)**

Cross-ancestry

0.082( 0.055 to 0.108)

8.943

EUR

0.082( 0.056 to 0.109)

8.907

ASN

0.051( -0.145 to 0.247)

0.213

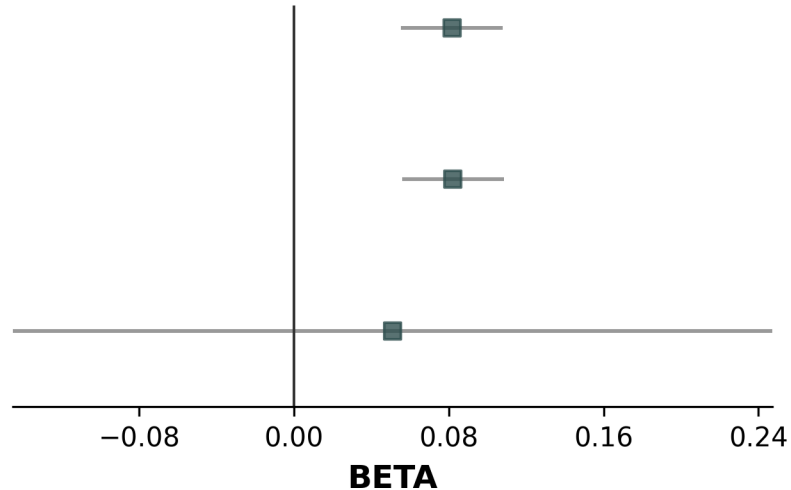

# auto\_GCC\_q3, rs72855624

**Confidence interval**

**P-value (-log10)**

Cross-ancestry

-0.073 (-0.095 to -0.052)

10.635

EUR

-0.078 (-0.101 to -0.055)

10.794

AFR

-0.029 (-0.112 to 0.055)

0.301

ASN

-0.038 (-0.145 to 0.068)

0.319

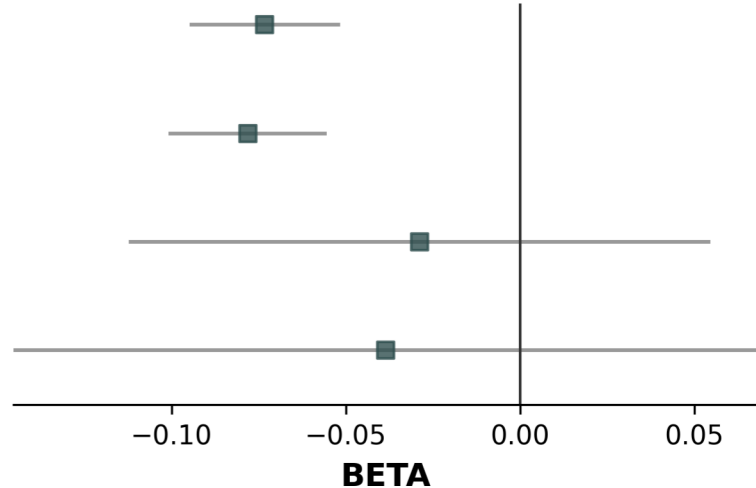

# auto\_GCC\_q4, rs1800407

**Confidence interval**

**P-value (-log10)**

Cross-ancestry

-0.074(-0.100 to -0.048)

7.53

EUR

-0.074(-0.101 to -0.048)

7.599

ASN

-0.014(-0.221 to 0.193)

0.048

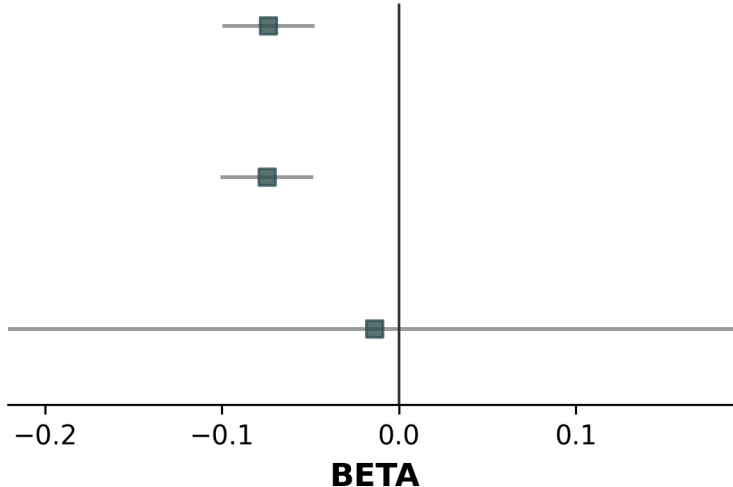

# auto\_GCC\_q4, rs10762201

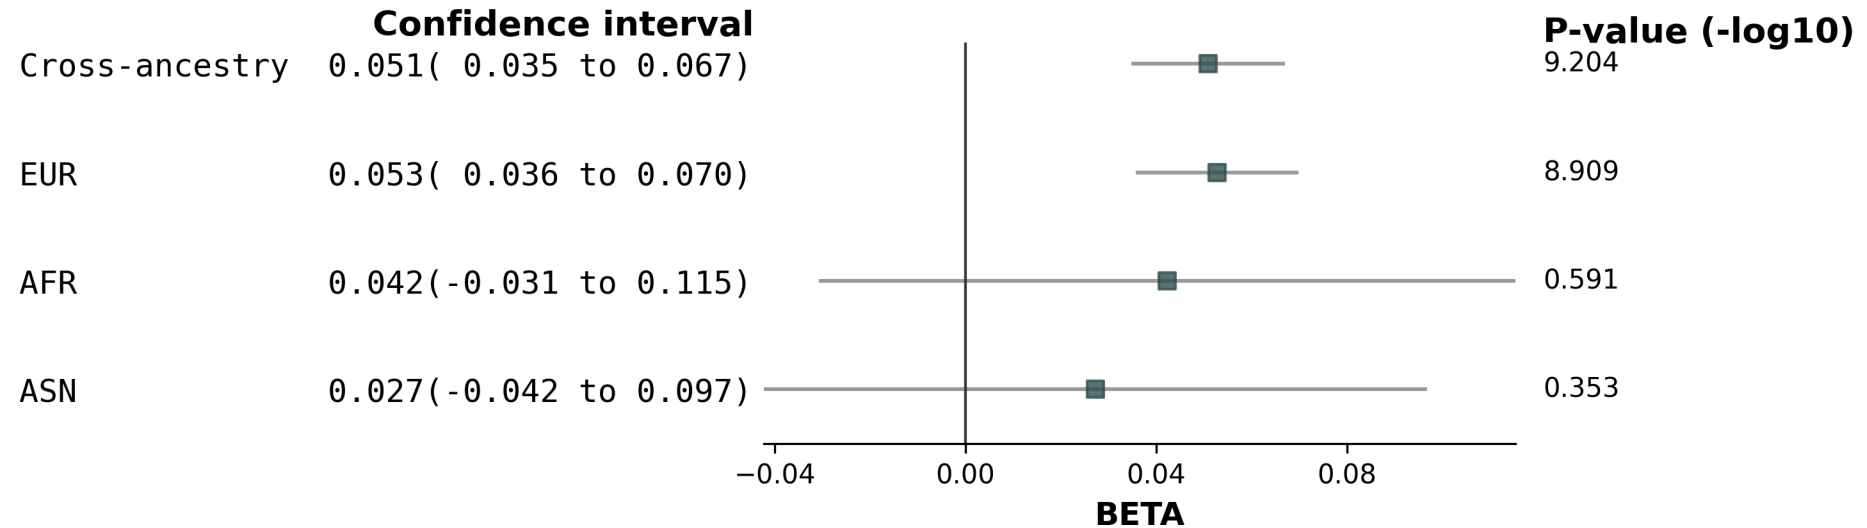

# auto\_GCC\_q4, rs62075722

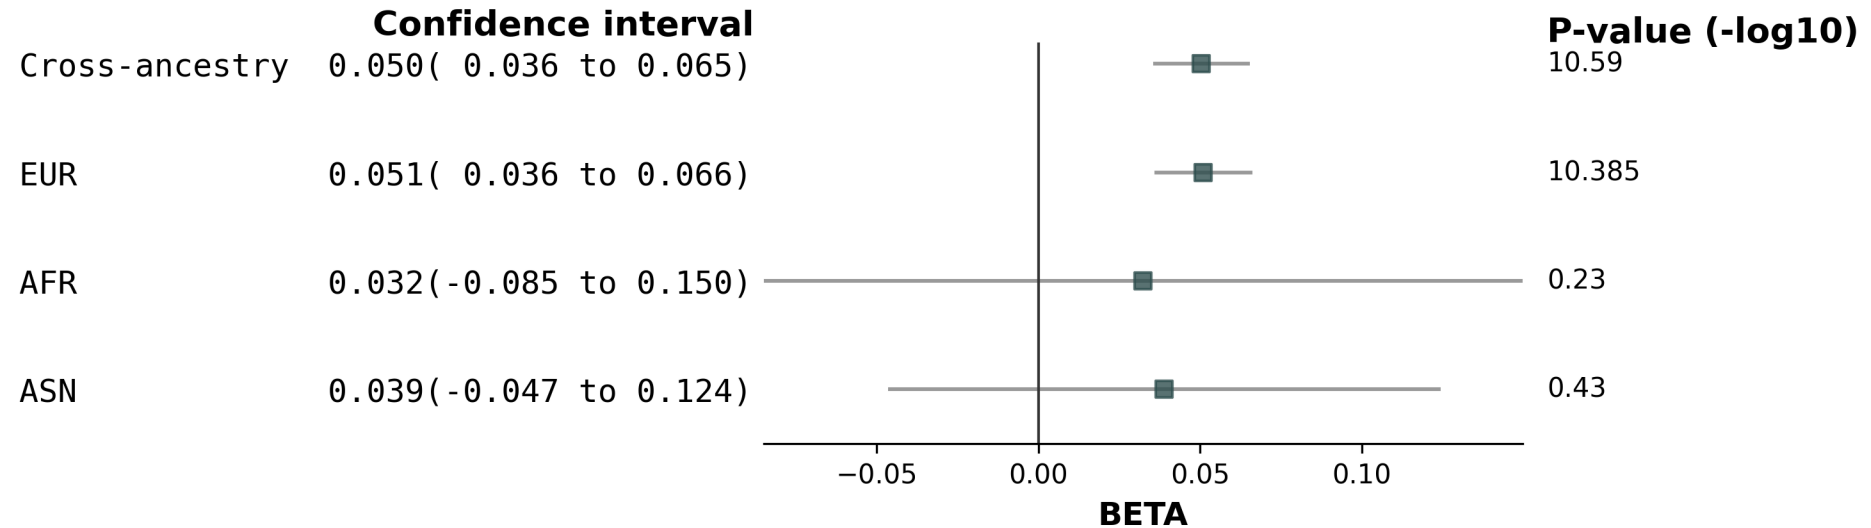

# auto\_GCC\_q6, 2:145315140\_GGTGT\_G

Confidence interval

P-value (-log10)

Cross-ancestry

-0.043 (-0.058 to -0.028)

7.449

EUR

-0.045 (-0.061 to -0.030)

7.731

AFR

-0.016 (-0.094 to 0.061)

0.166

ASN

-0.004 (-0.084 to 0.075)

0.04

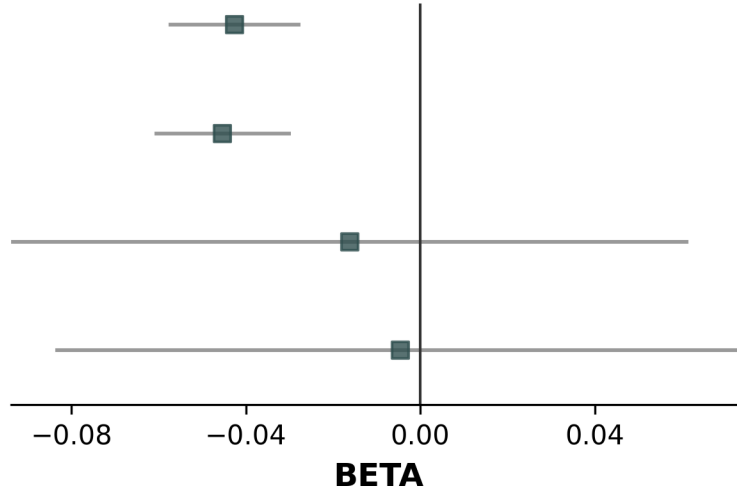



# auto\_GCC\_q6, 17:79586227\_TA\_T

Confidence interval

P-value (-log10)

Cross-ancestry

-0.047 (-0.061 to -0.032)

9.263

EUR

-0.049 (-0.065 to -0.034)

9.388

AFR

-0.000 (-0.065 to 0.065)

0.002

ASN

-0.044 (-0.115 to 0.026)

0.656

-0.08

-0.04

0.00

0.04

BETA

# auto\_GCC\_q8, 17:79614932\_TTAAC\_T

Confidence interval

P-value (-log10)

Cross-ancestry

-0.060 (-0.075 to -0.045)

14.444

EUR

-0.062 (-0.077 to -0.047)

14.767

AFR

0.007 (-0.108 to 0.122)

0.044

ASN

-0.029 (-0.113 to 0.056)

0.293

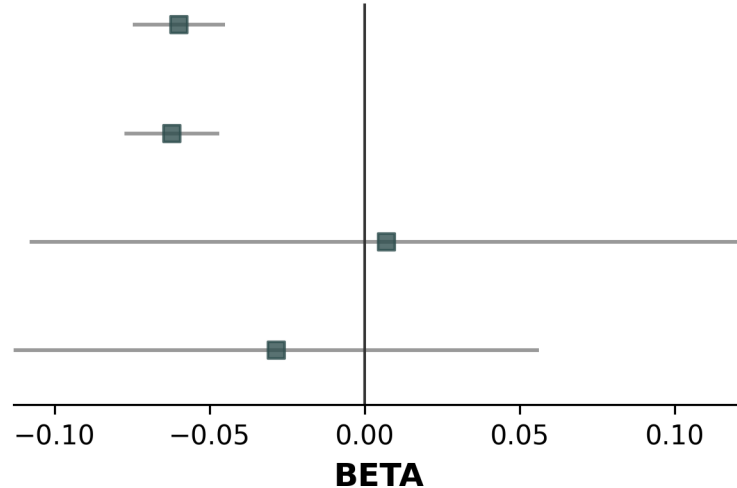

# auto\_GCC\_q8, rs10762201

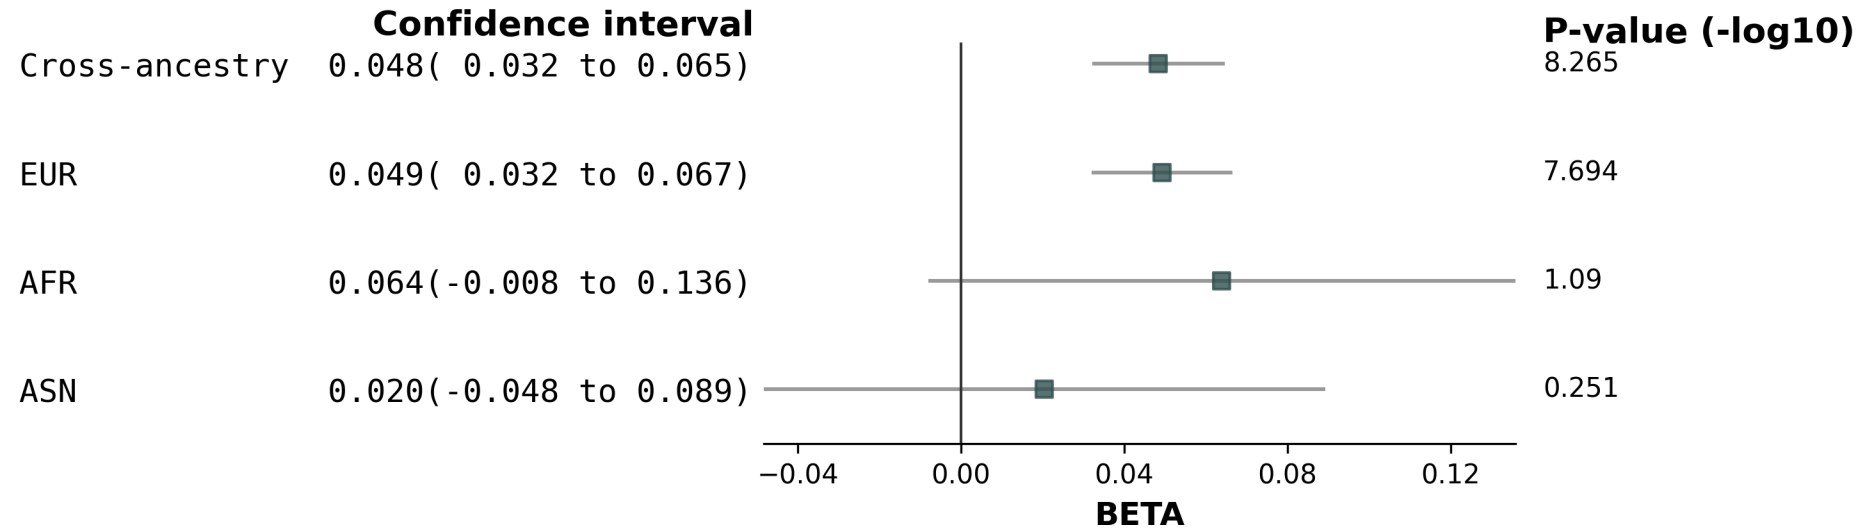

# auto\_GCC\_q8, rs10933712

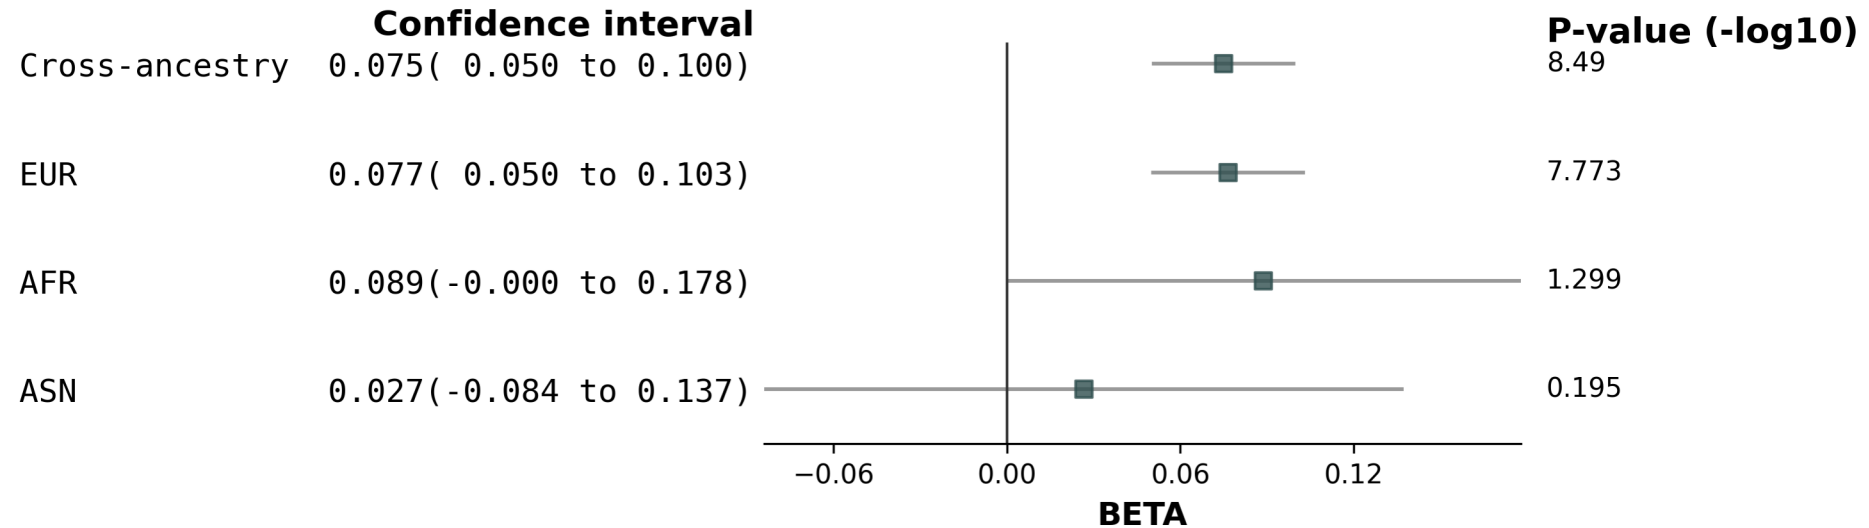

# auto\_GCC\_q8, rs72766456

**Confidence interval**

**P-value (-log10)**

Cross-ancestry

-0.061 (-0.083 to -0.039)

7.153

EUR

-0.065 (-0.088 to -0.042)

7.456

AFR

-0.057 (-0.176 to 0.062)

0.459

ASN

0.005 (-0.084 to 0.094)

0.039

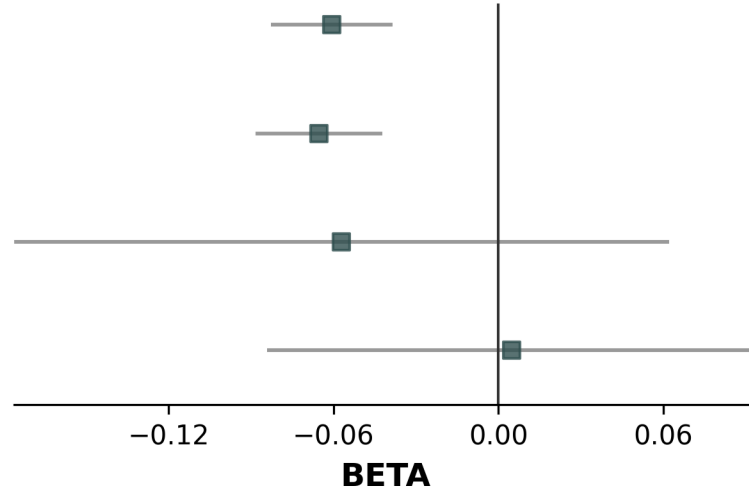

# auto\_GCC\_q8, rs72855624

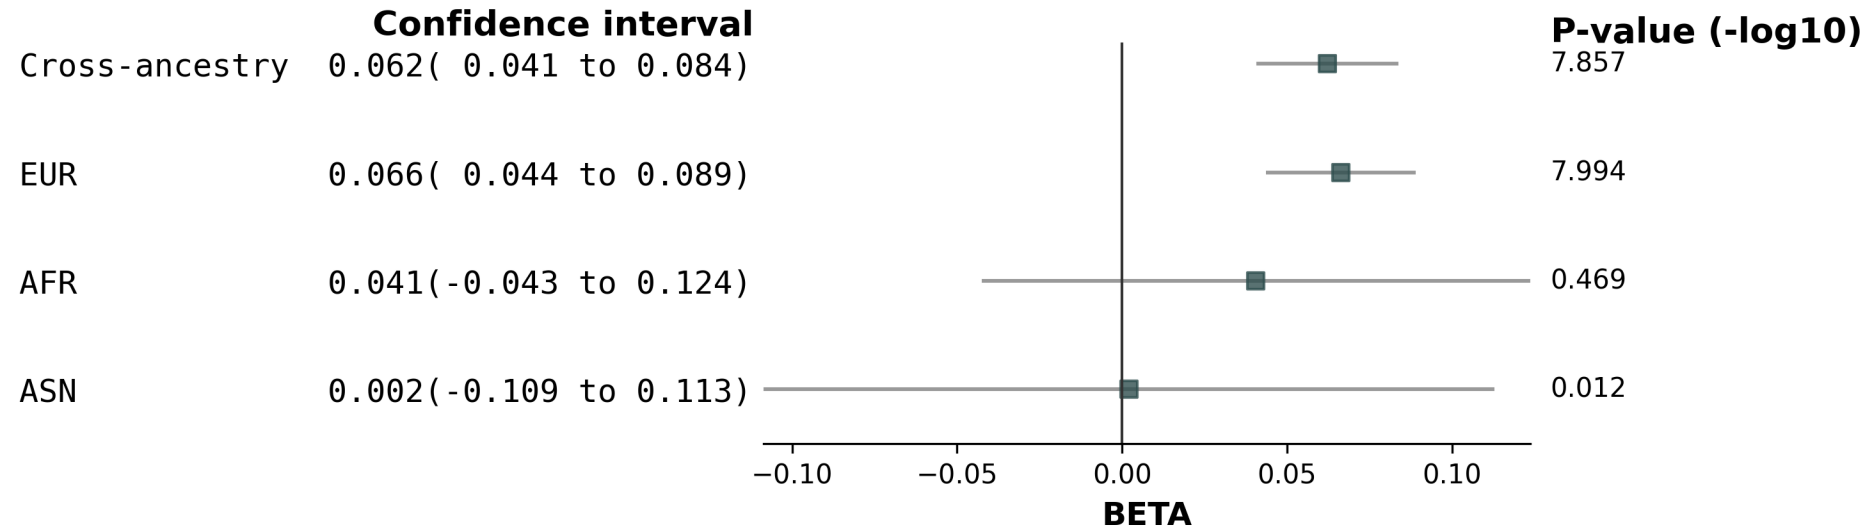

# auto\_GCC\_q10, 16:80430159\_CG\_C

Confidence interval

P-value (-log10)

Cross-ancestry

0.170( 0.113 to 0.228)

8.136

EUR

0.175( 0.115 to 0.235)

8.023

ASN

0.105( -0.117 to 0.328)

0.451

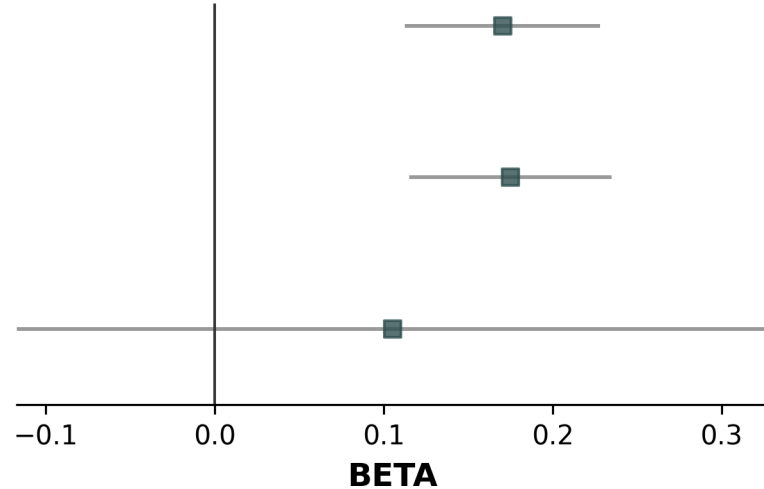

# auto\_GCC\_q10, rs17472472

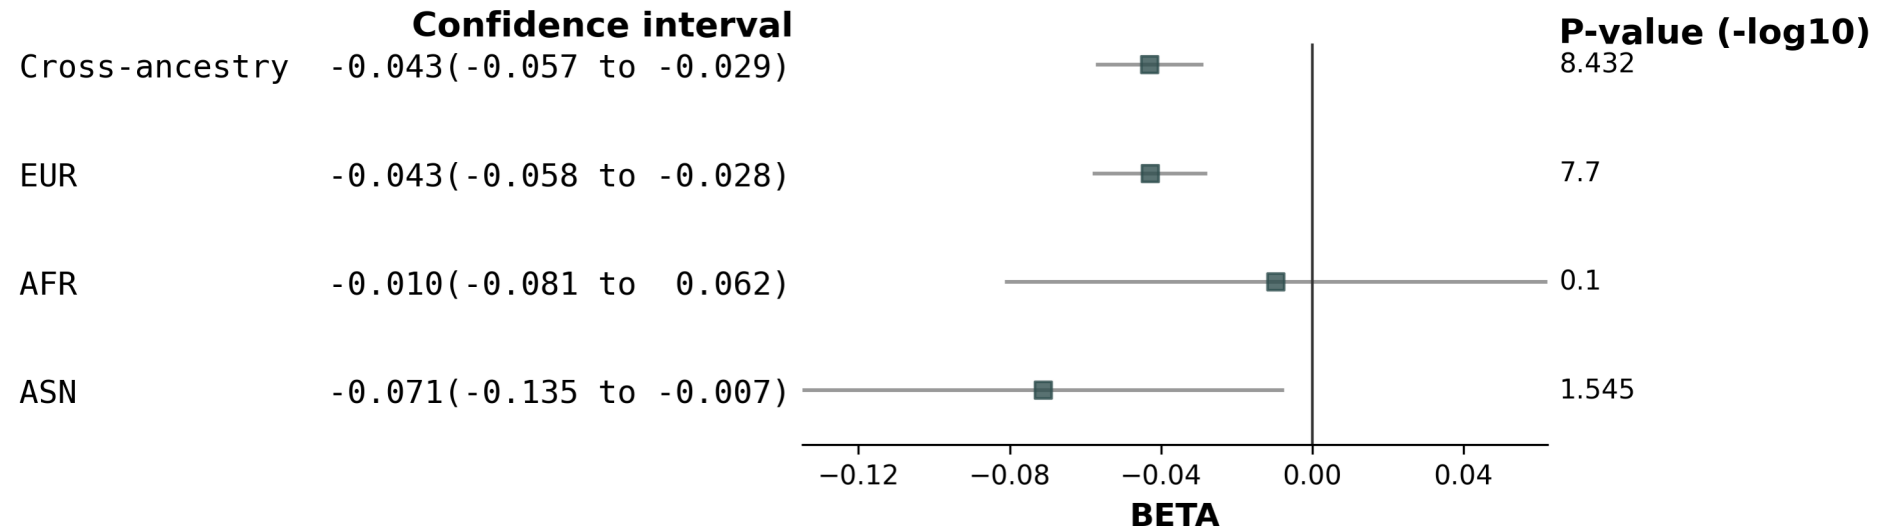



# auto\_RNFL\_q0, rs62172787

**Confidence interval**

**P-value (-log10)**

Cross-ancestry -0.138 (-0.187 to -0.088) 7.338

EUR -0.138 (-0.187 to -0.088) 7.338

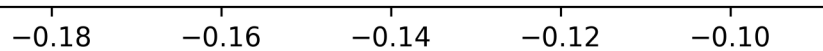

# auto\_RNFL\_q1, rs7816434

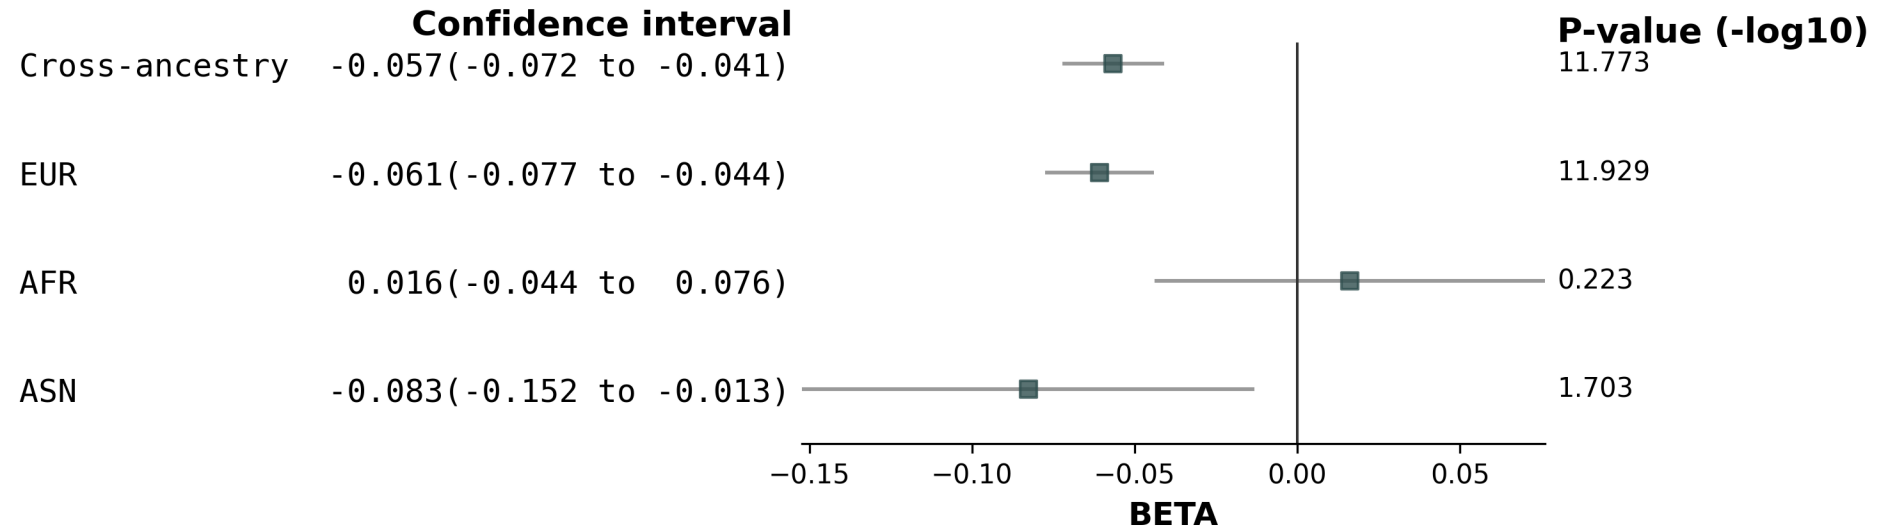

# auto\_RNFL\_q1, rs10823166

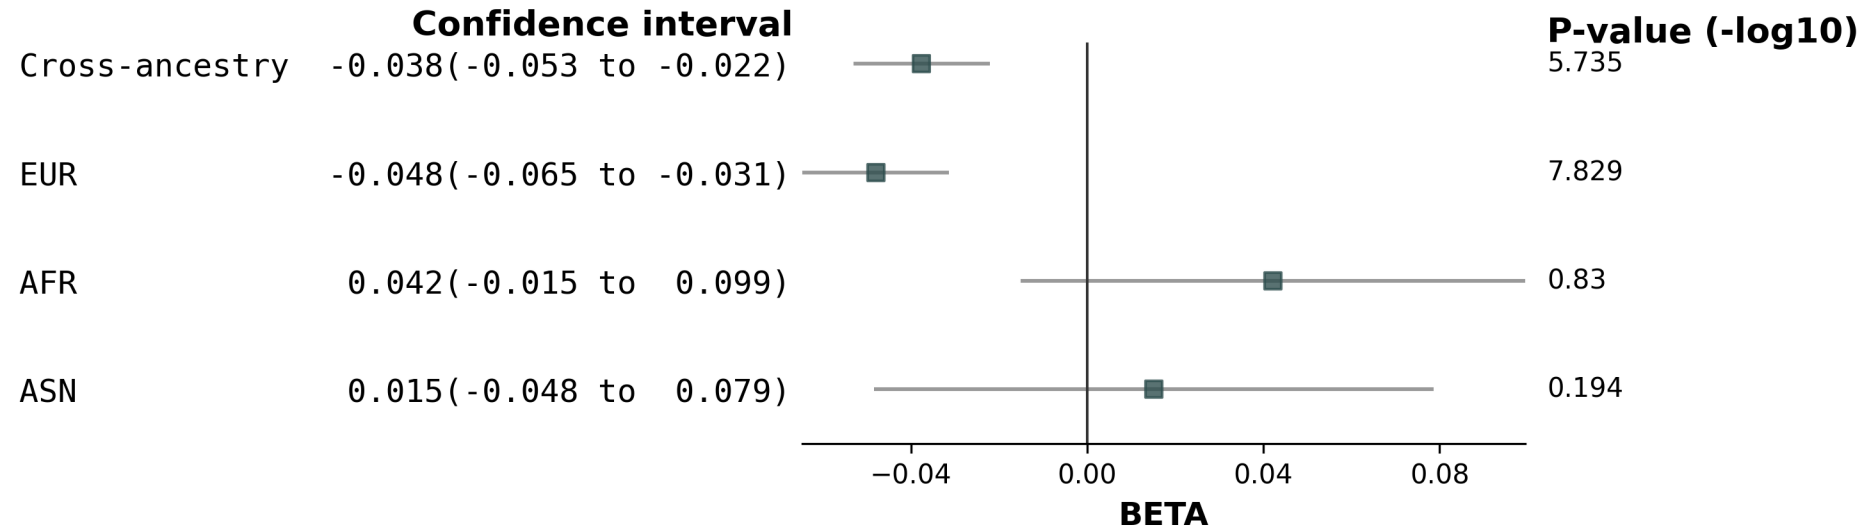

# auto\_RNFL\_q1, rs56186450

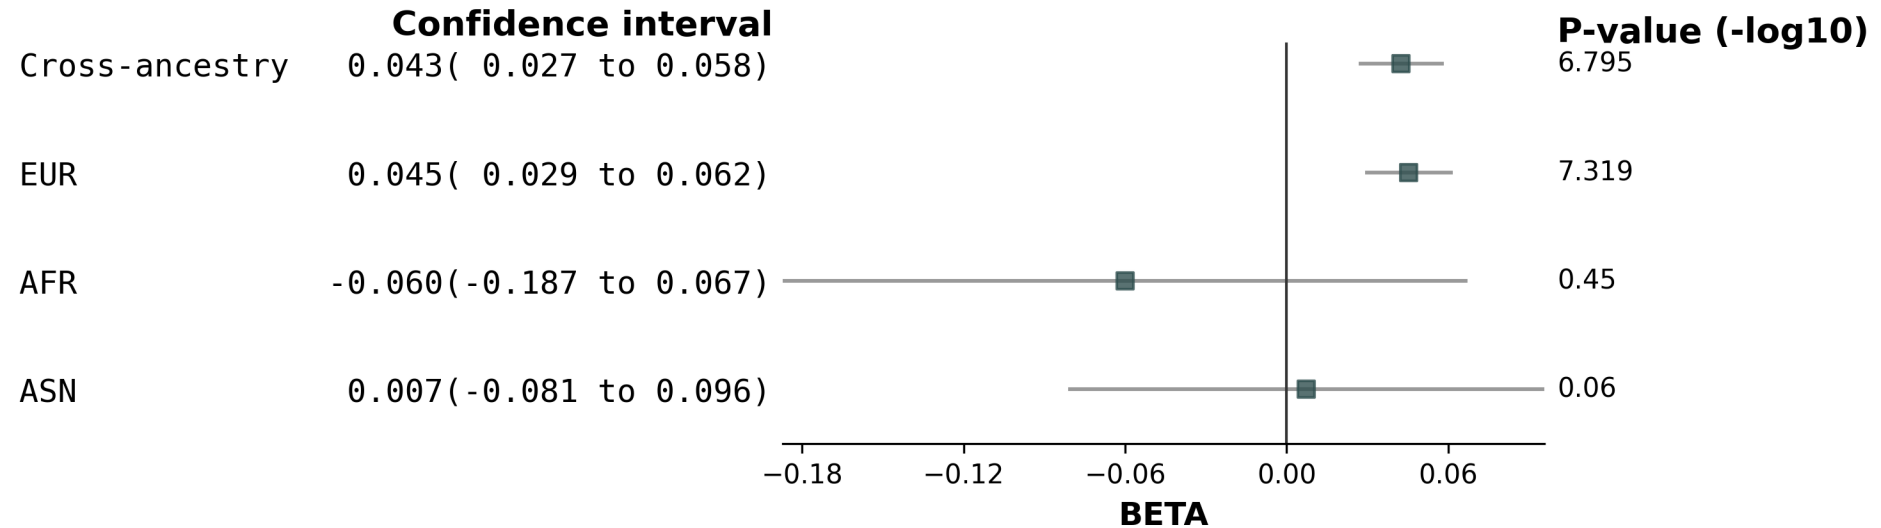

# auto\_RNFL\_q3, rs3858146

**Confidence interval**

**P-value (-log10)**

Cross-ancestry

-0.069 (-0.084 to -0.053)

16.932

EUR

-0.074 (-0.090 to -0.057)

17.731

AFR

0.019 (-0.052 to 0.090)

0.225

ASN

-0.060 (-0.136 to 0.016)

0.906

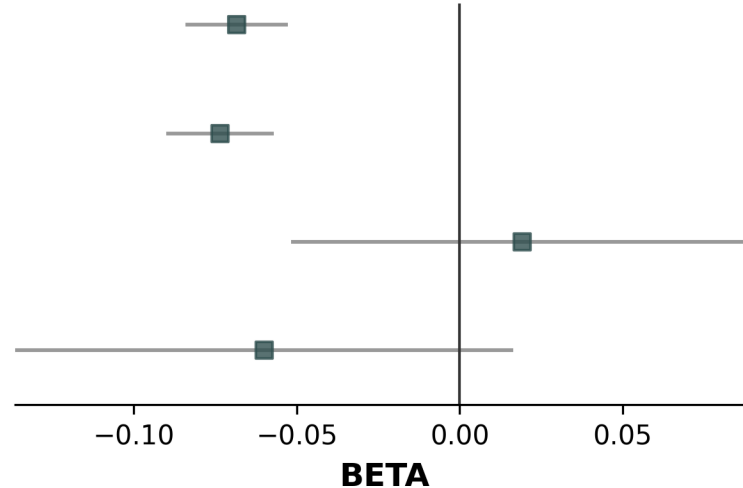

# auto\_RNFL\_q3, rs6469169

**Confidence interval**

**P-value (-log10)**

Cross-ancestry

-0.048 (-0.064 to -0.032)

8.14

EUR

-0.049 (-0.066 to -0.032)

7.91

AFR

-0.033 (-0.104 to 0.037)

0.449

ASN

-0.031 (-0.114 to 0.053)

0.327

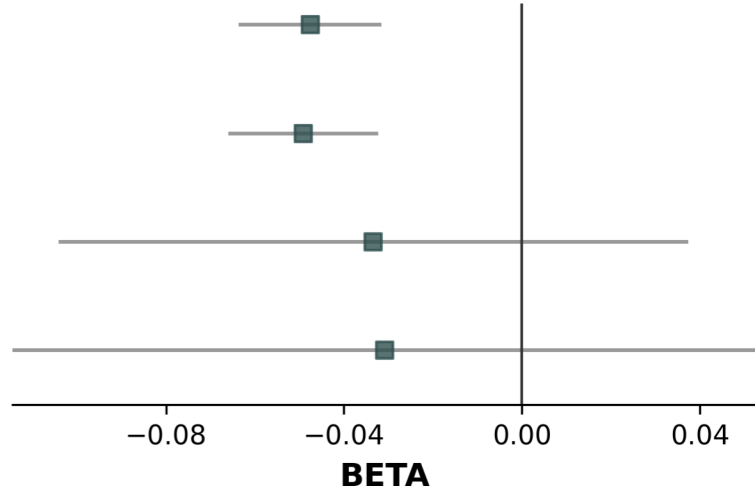

# auto\_RNFL\_q3, rs10483727

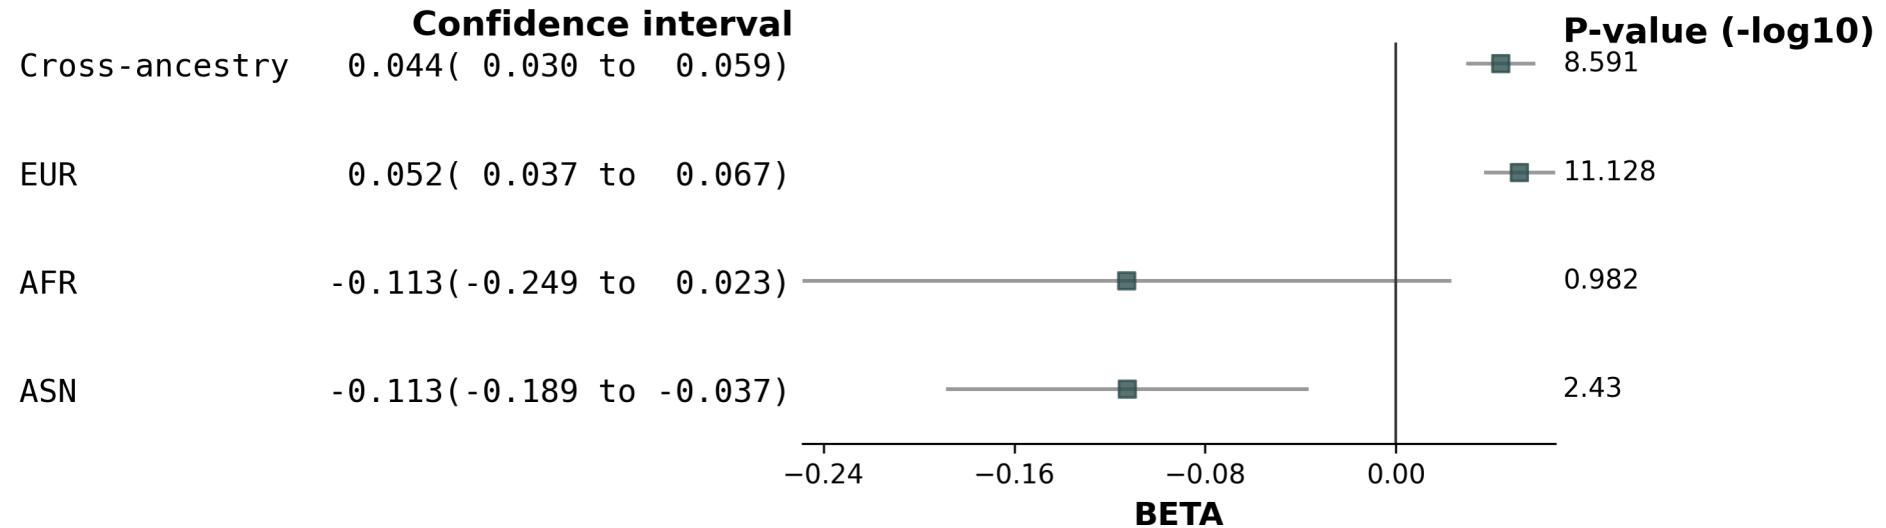

# auto\_RNFL\_q3, rs199806394

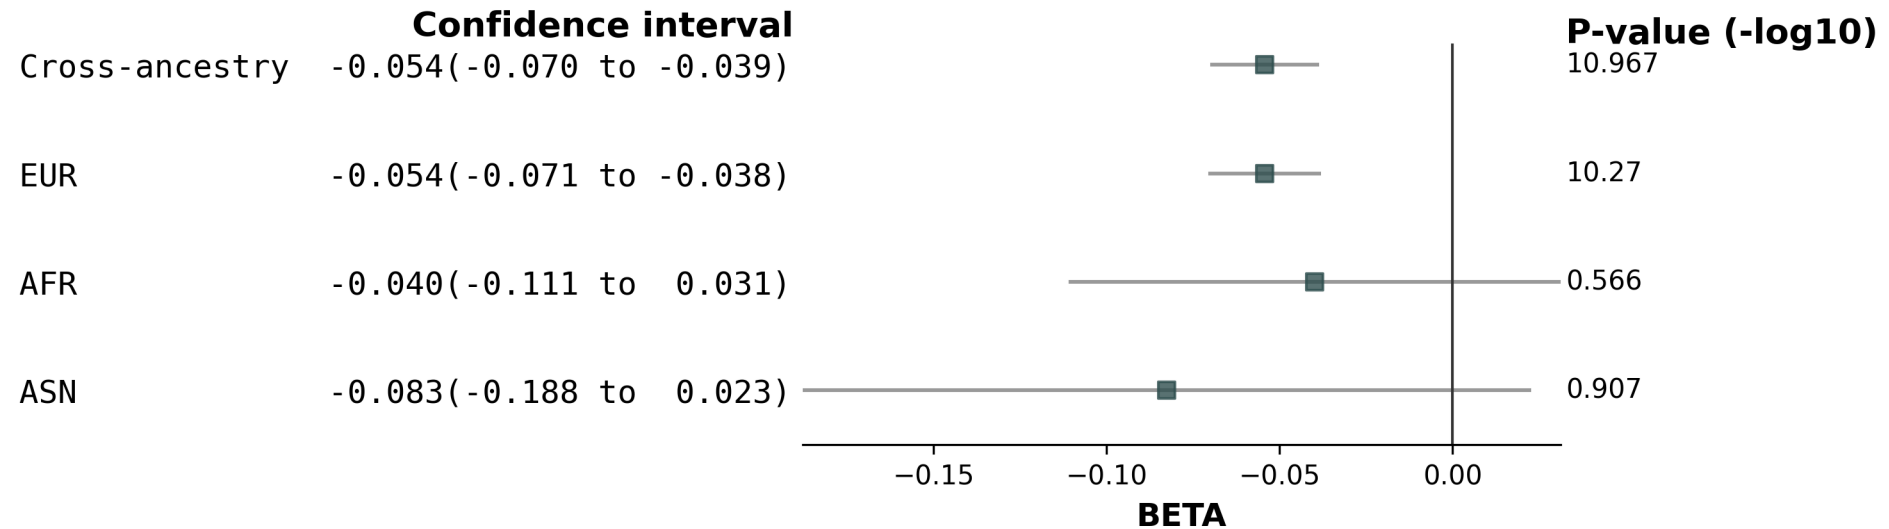



# auto\_RNFL\_q4, rs3790909

**Confidence interval**

**P-value (-log10)**

Cross-ancestry -0.048 (-0.062 to -0.034)

10.296

EUR -0.050 (-0.065 to -0.035)

9.893

AFR 0.009 (-0.054 to 0.071)

0.105

ASN -0.083 (-0.149 to -0.016)

1.841

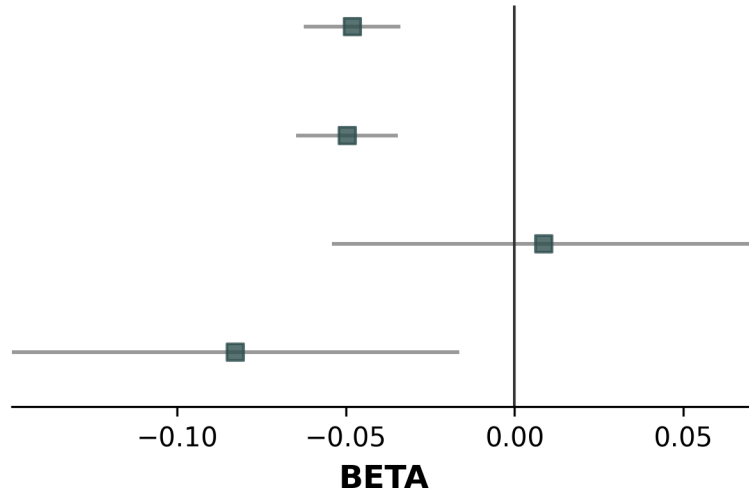

# auto\_RNFL\_q4, rs10762198

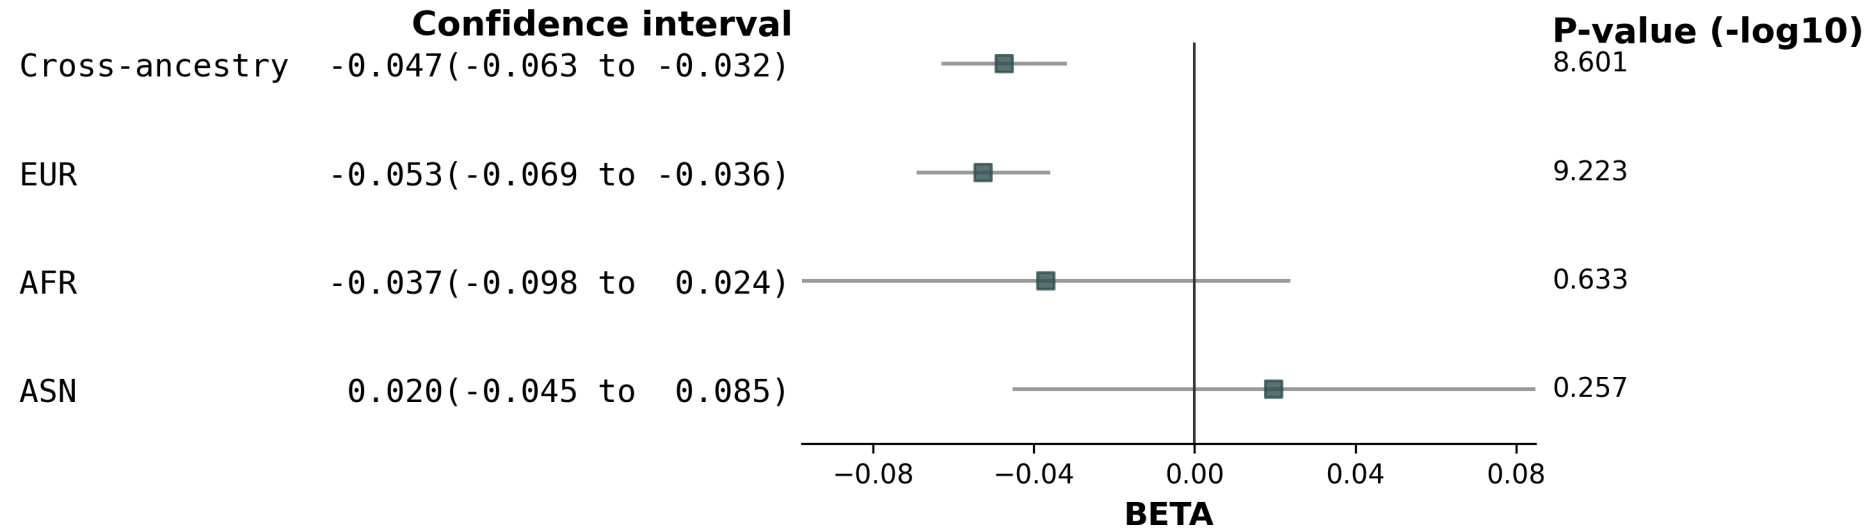

# auto\_RNFL\_q6, rs10762198

**Confidence interval**

**P-value (-log10)**

Cross-ancestry

-0.082 (-0.097 to -0.066)

23.668

EUR

-0.088 (-0.104 to -0.071)

24.335

AFR

-0.012 (-0.079 to 0.055)

0.138

ASN

-0.052 (-0.122 to 0.017)

0.86

-0.12

-0.08

-0.04

0.00

0.04

**BETA**

# auto\_RNFL\_q6, rs112115087

Confidence interval

P-value (-log10)

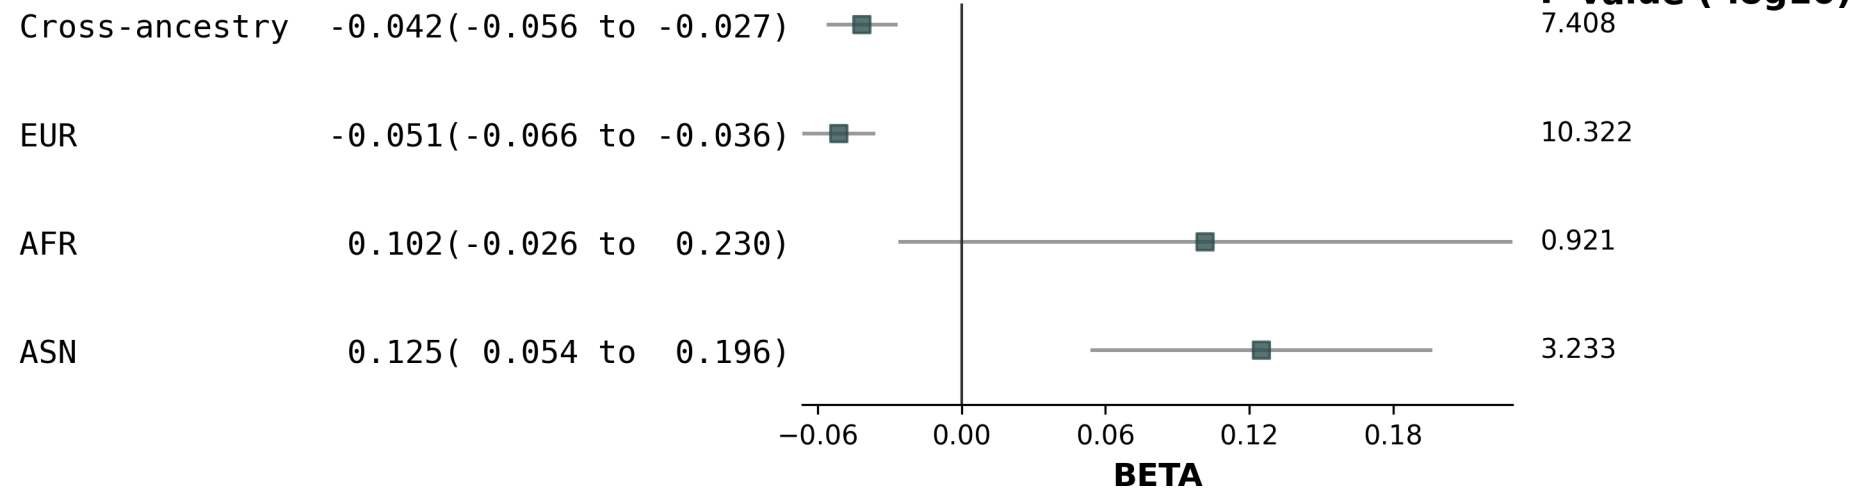

# auto\_RNFL\_q7, rs4814312

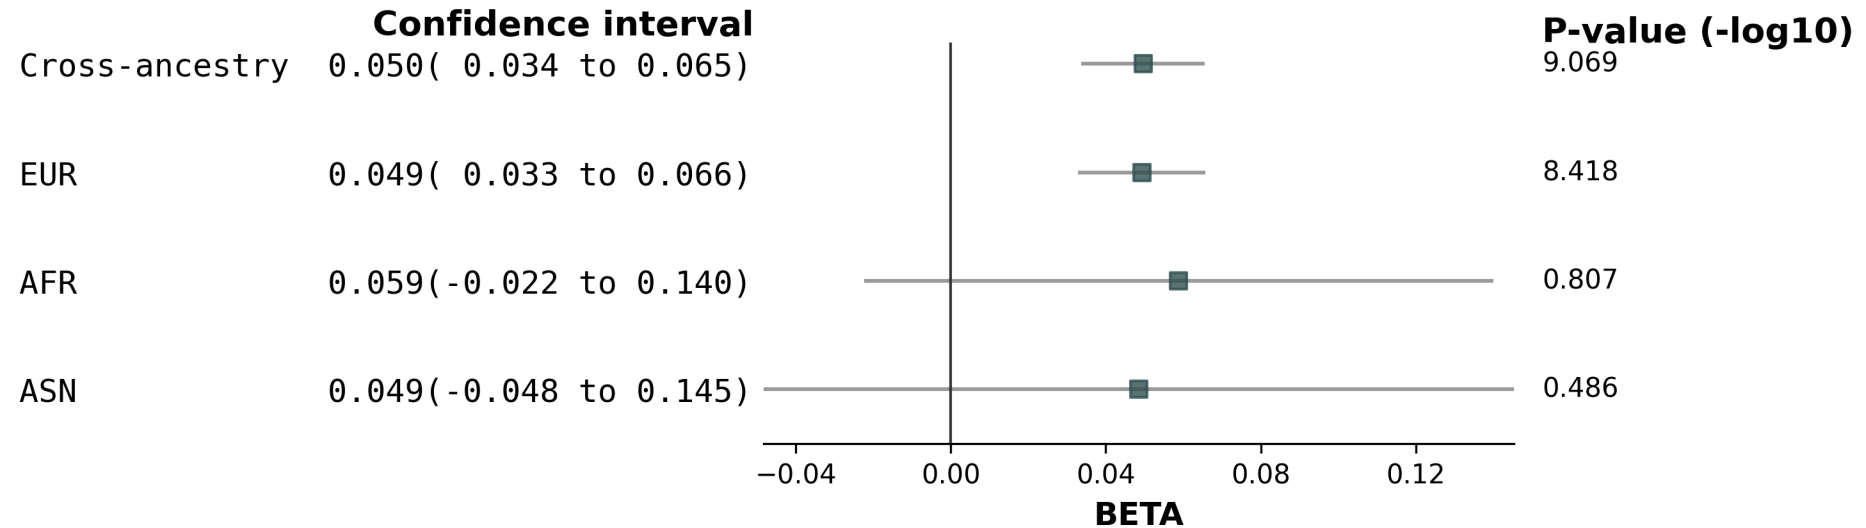

# auto\_RNFL\_q8, rs4745956

**Confidence interval**

**P-value (-log10)**

Cross-ancestry

-0.049 (-0.065 to -0.033)

8.439

EUR

-0.053 (-0.070 to -0.036)

8.805

AFR

-0.024 (-0.098 to 0.049)

0.286

ASN

-0.004 (-0.077 to 0.068)

0.043

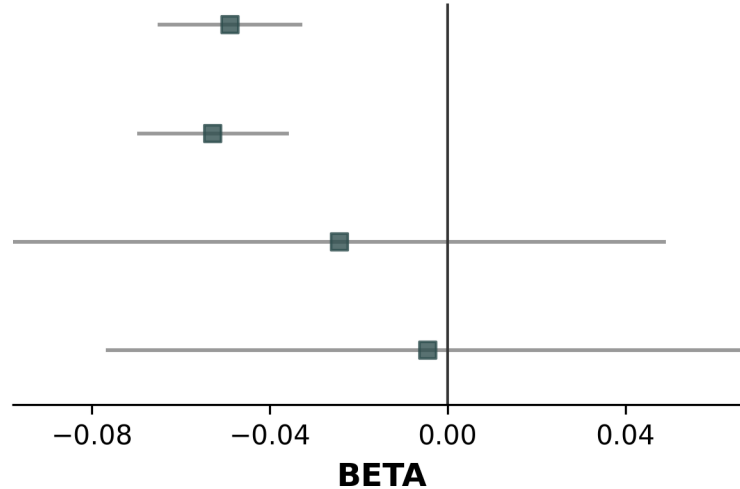

# auto\_RNFL\_q8, rs35320790

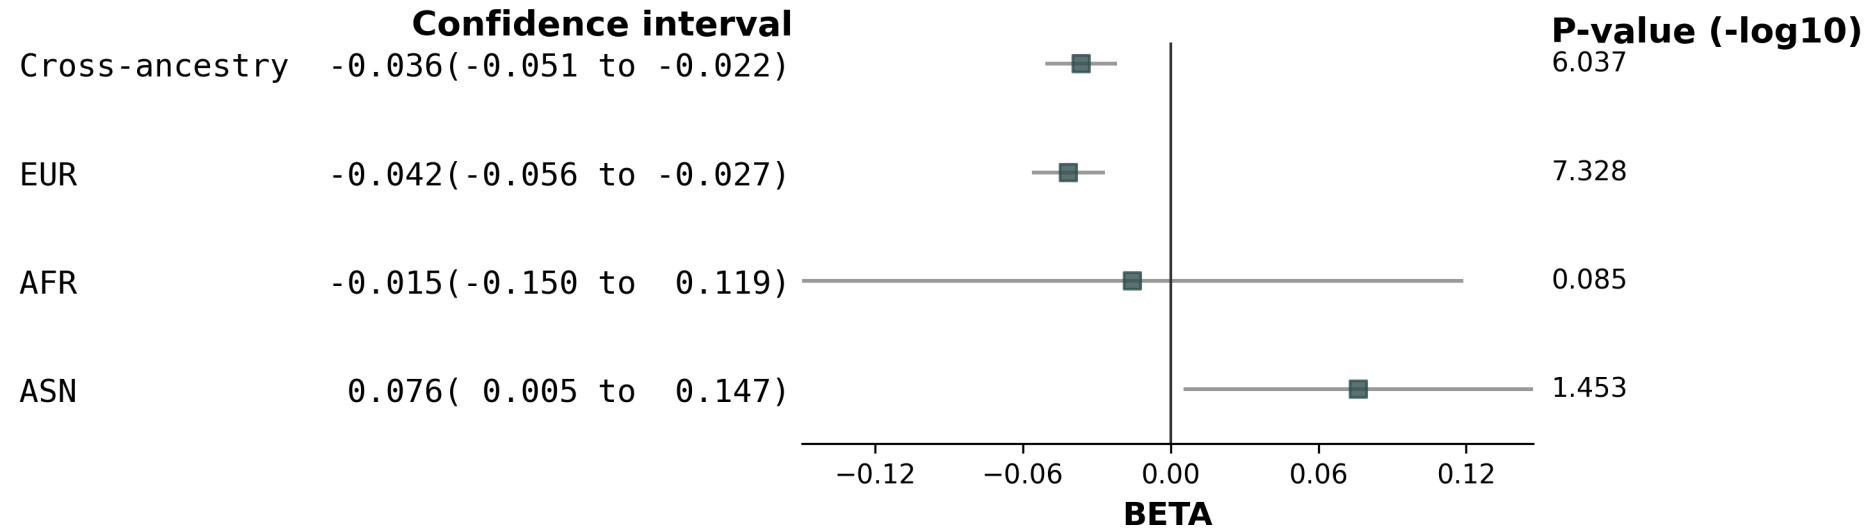

# moco\_GCC\_q3, rs4746749

**Confidence interval**

**P-value (-log10)**

Cross-ancestry

-0.056 (-0.072 to -0.040)

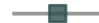

10.571

EUR

-0.061 (-0.078 to -0.044)

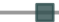

11.393

AFR

0.056 (-0.044 to 0.156)

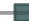

0.564

ASN

-0.030 (-0.105 to 0.045)

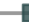

0.367

-0.06

0.00

0.06

0.12

**BETA**



# moco\_GCC\_q3, rs112364254

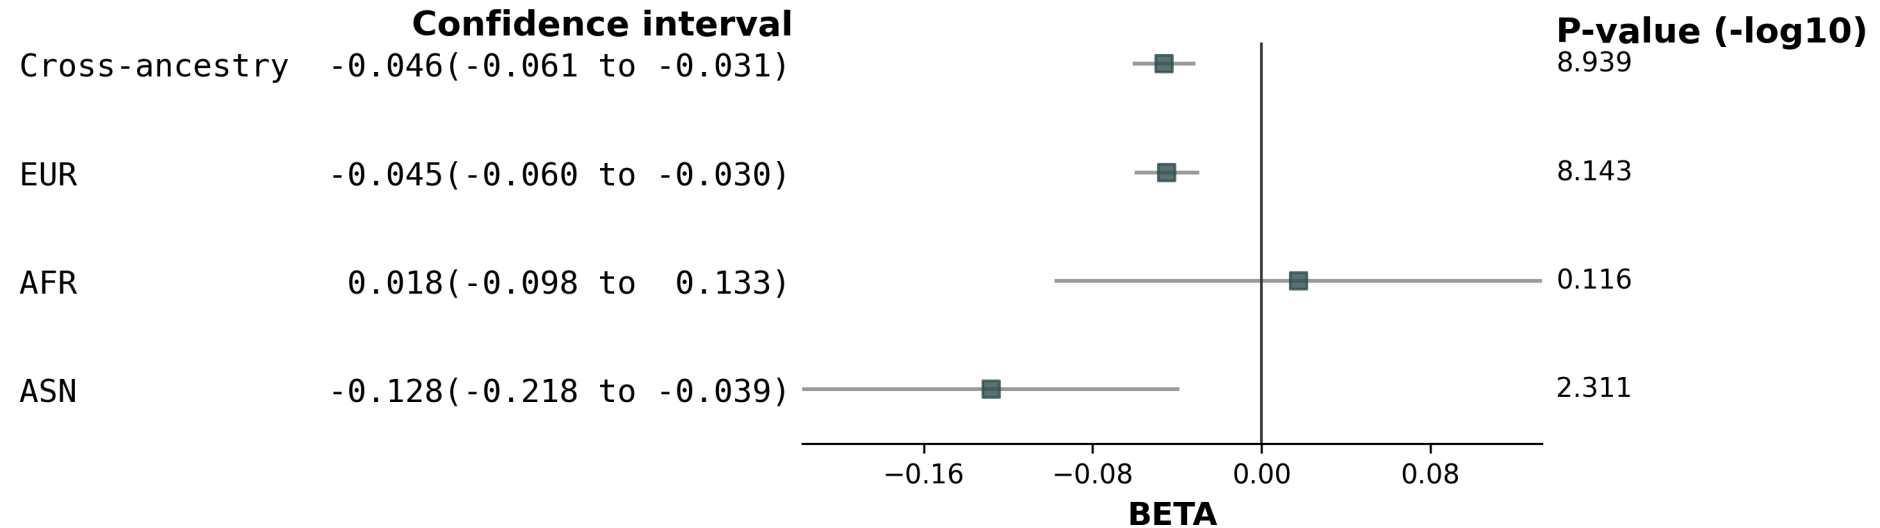

# moco\_GCC\_q8, rs3767216

**Confidence interval**

**P-value (-log10)**

Cross-ancestry

-0.044 (-0.059 to -0.029)

8.062

EUR

-0.045 (-0.060 to -0.029)

7.829

AFR

-0.065 (-0.139 to 0.009)

1.076

ASN

0.003 (-0.069 to 0.075)

0.027

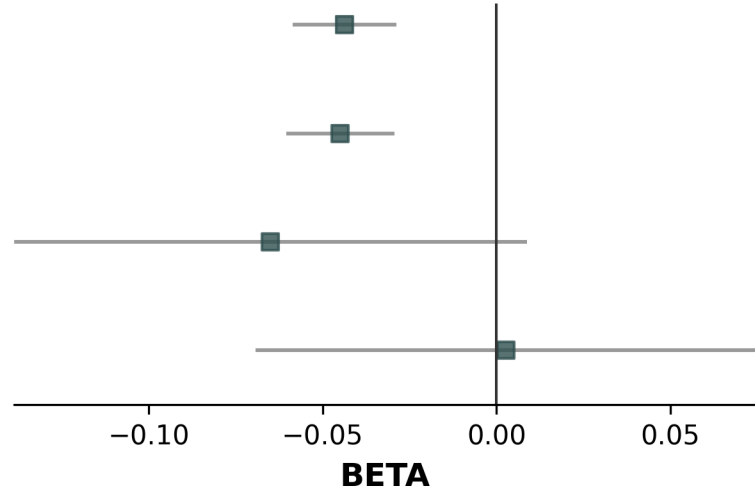

# moco\_RNFL\_q1, 8:109194601\_CA\_C

Confidence interval

P-value (-log10)

Cross-ancestry

-0.050 (-0.066 to -0.033)

8.323

EUR

-0.048 (-0.066 to -0.031)

7.328

AFR

-0.065 (-0.162 to 0.032)

0.719

ASN

-0.071 (-0.150 to 0.007)

1.12

-0.16 -0.12 -0.08 -0.04 0.00

BETA

# moco\_RNFL\_q1, rs10762198

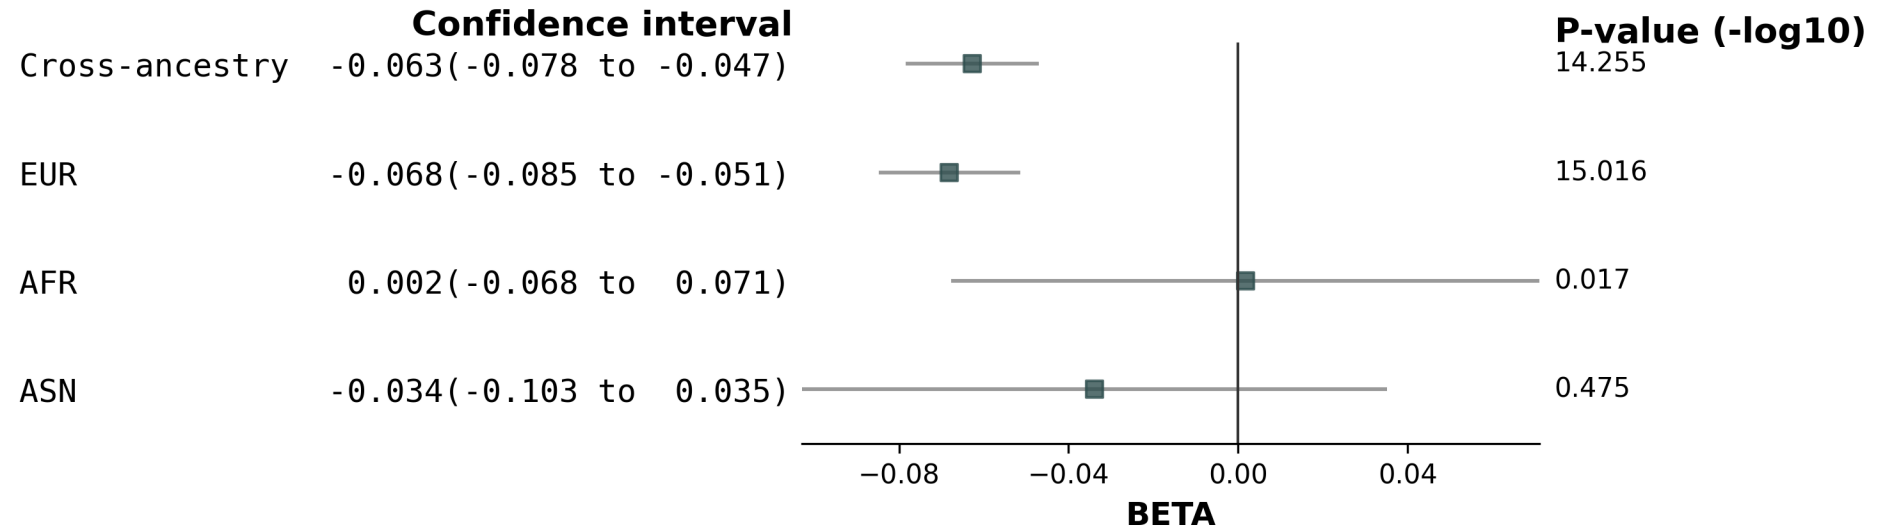

# moco\_RNFL\_q1, rs28711886

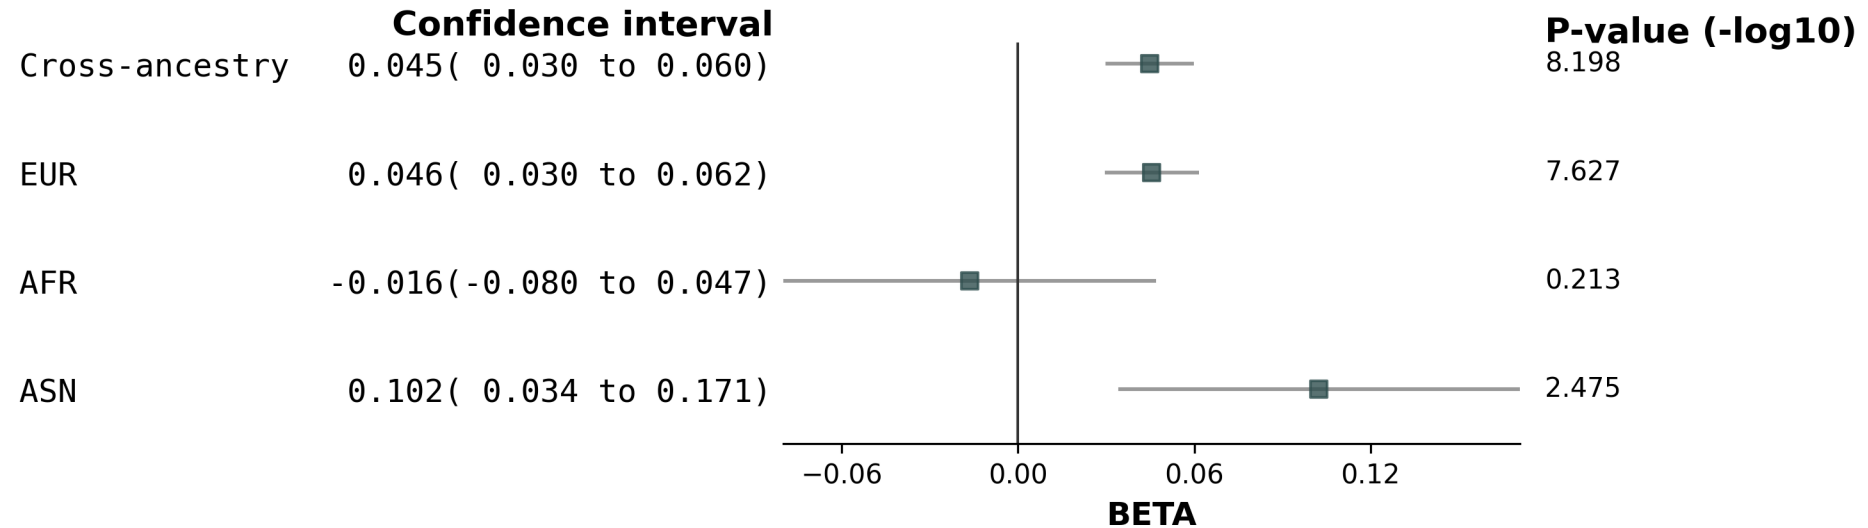

# moco\_RNFL\_q3, rs4750249

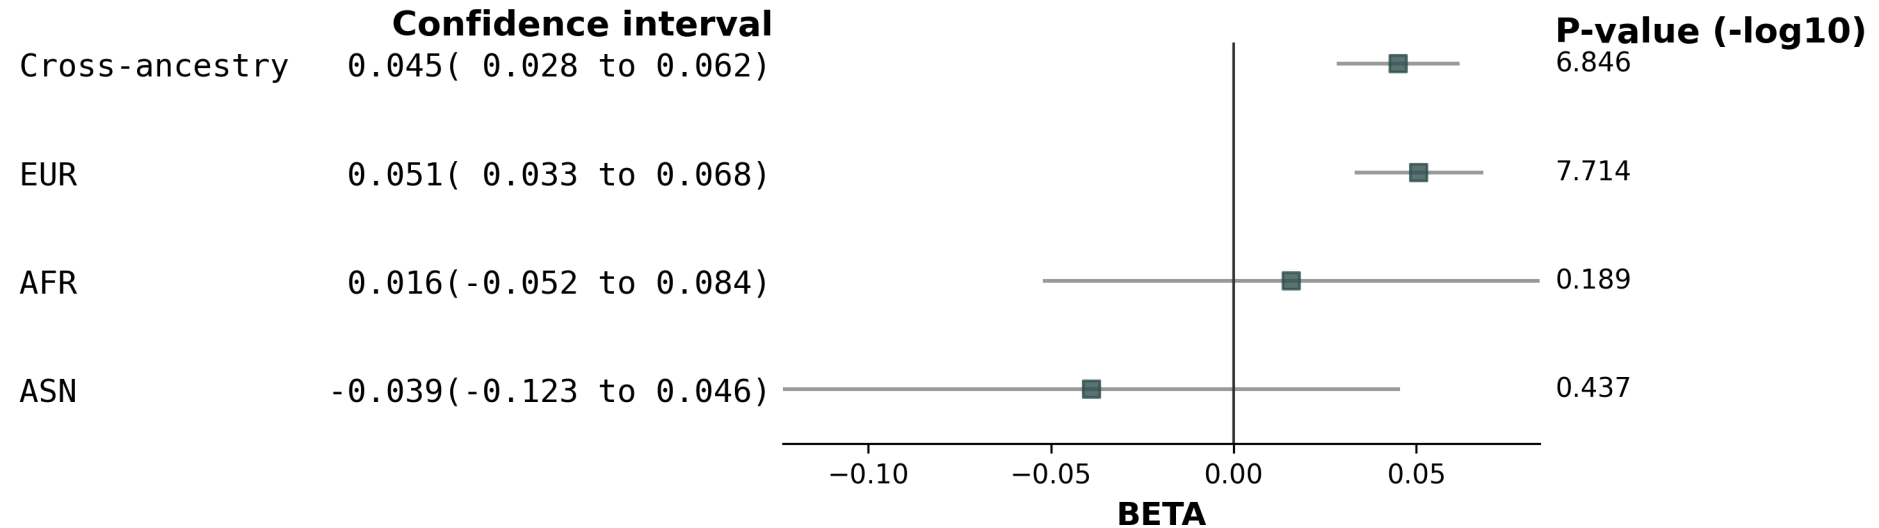

# moco\_RNFL\_q5, rs61854803

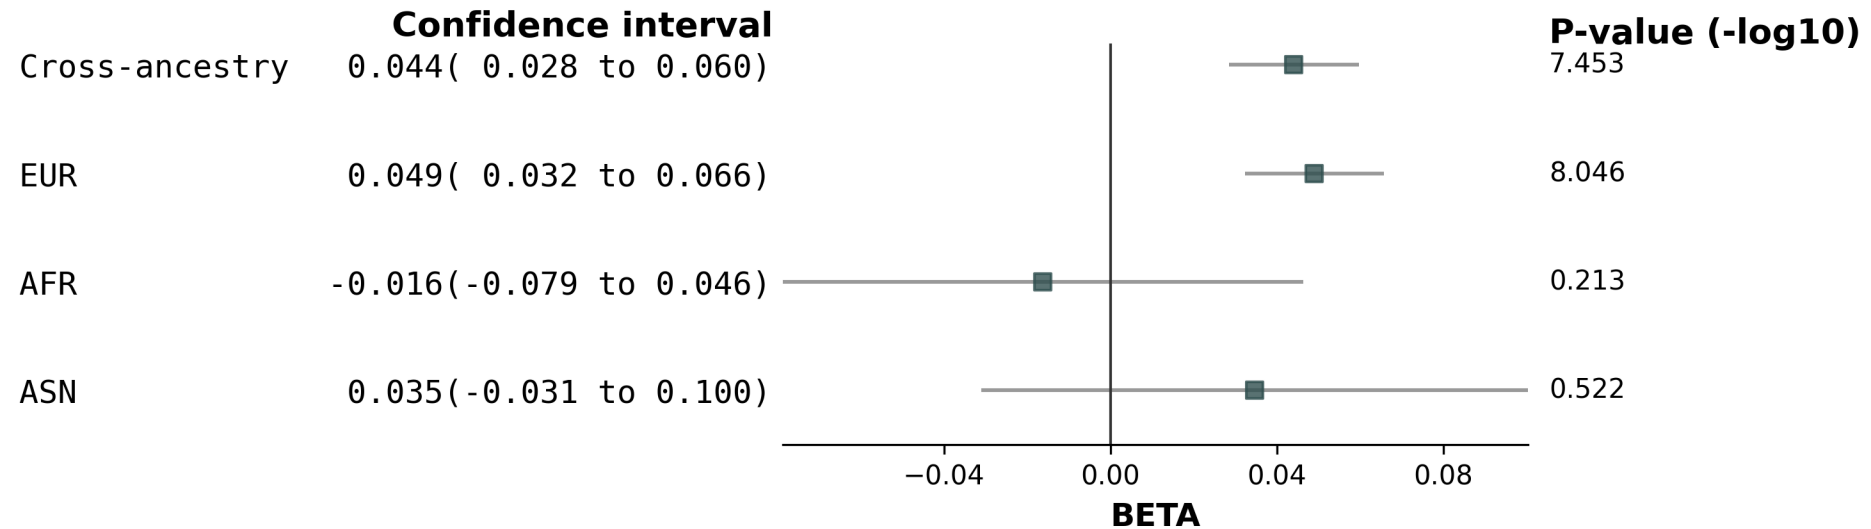

# moco\_RNFL\_q7, rs137902140

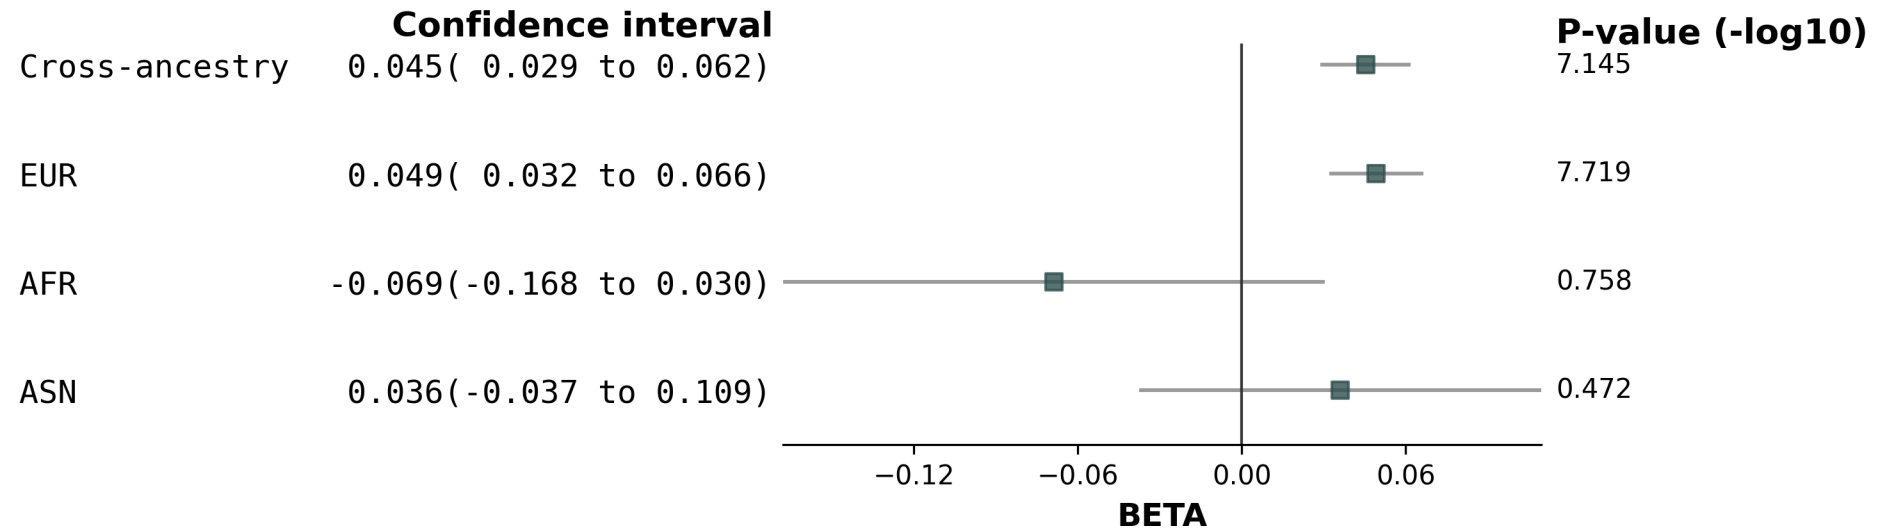



# moco\_RNFL\_q9, rs10762198

**Confidence interval**

**P-value (-log10)**

Cross-ancestry

-0.053 (-0.069 to -0.037)

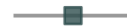

10.174

EUR

-0.062 (-0.078 to -0.045)

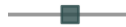

12.511

AFR

0.030 (-0.043 to 0.104)

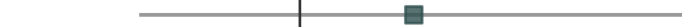

0.379

ASN

0.042 (-0.031 to 0.116)

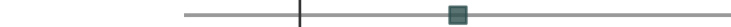

0.589

-0.04

0.00

0.04

0.08

**BETA**

# auto\_GCC\_q0, 17:79614932\_TTAAC\_T



# auto\_GCC\_q0, rs592381

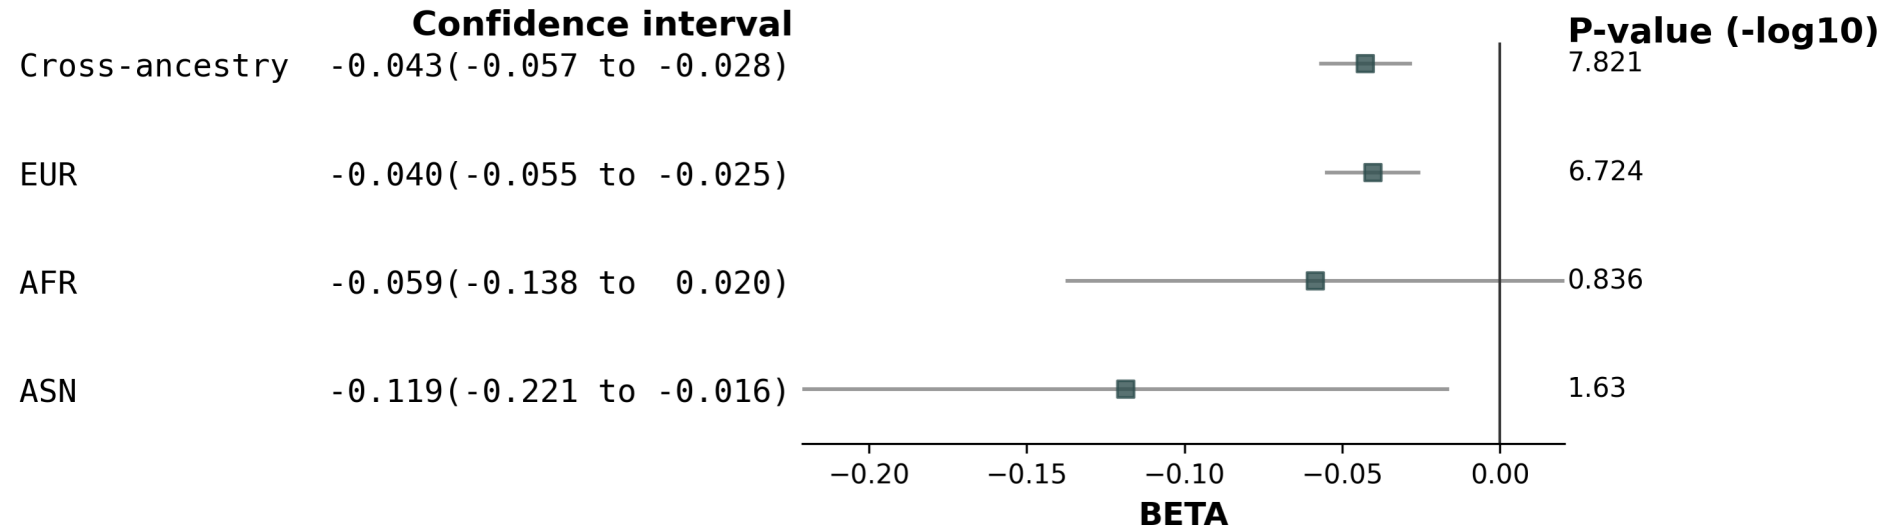

# auto\_GCC\_q0, rs11377419

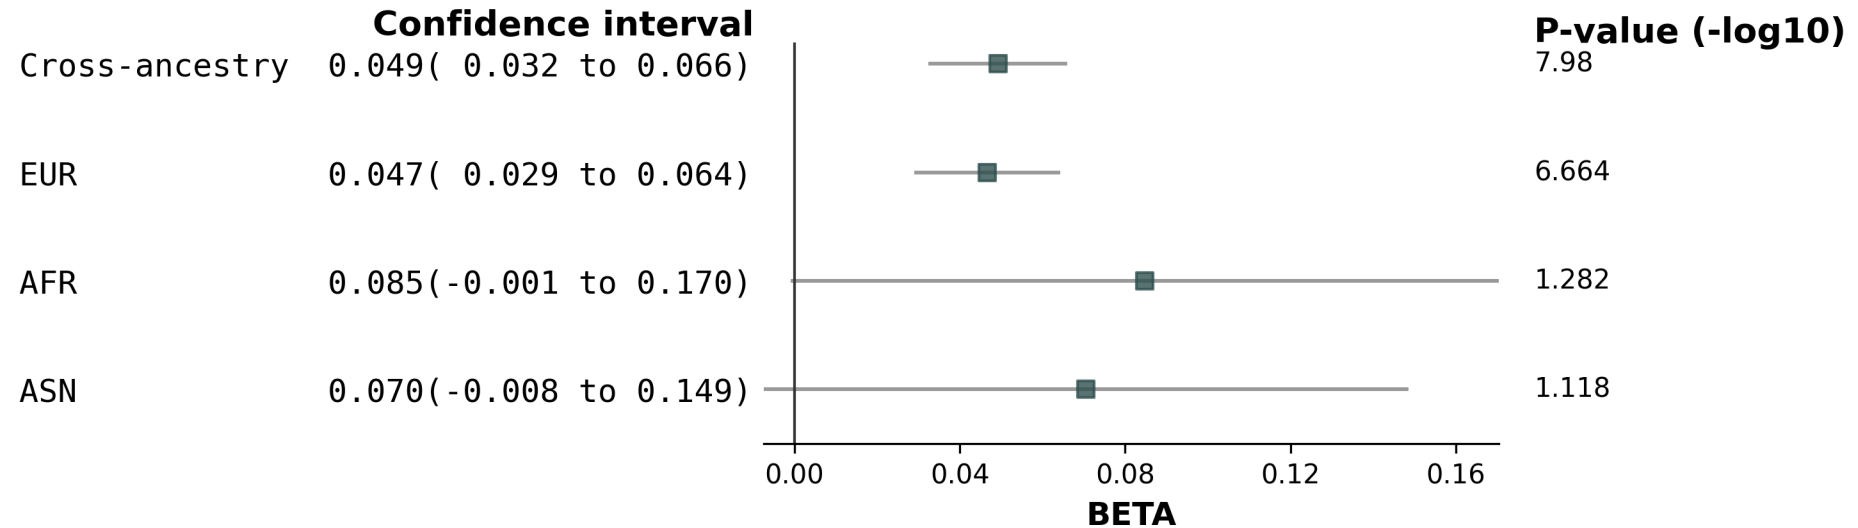

# auto\_GCC\_q0, rs72855624

**Confidence interval**

**P-value (-log10)**

Cross-ancestry

-0.065 (-0.086 to -0.043)

8.579

EUR

-0.067 (-0.089 to -0.044)

8.243

AFR

-0.061 (-0.147 to 0.024)

0.804

ASN

-0.021 (-0.132 to 0.090)

0.149

-0.10

-0.05

0.00

0.05

**BETA**

# auto\_GCC\_q2, rs12074133

Confidence interval

P-value (-log10)

Cross-ancestry

-0.050 (-0.064 to -0.035)

10.869

EUR

-0.046 (-0.061 to -0.031)

8.585

AFR

-0.052 (-0.119 to 0.015)

0.887

ASN

-0.114 (-0.179 to -0.050)

3.283

-0.16 -0.12 -0.08 -0.04 0.00

BETA

# auto\_GCC\_q2, rs12884199

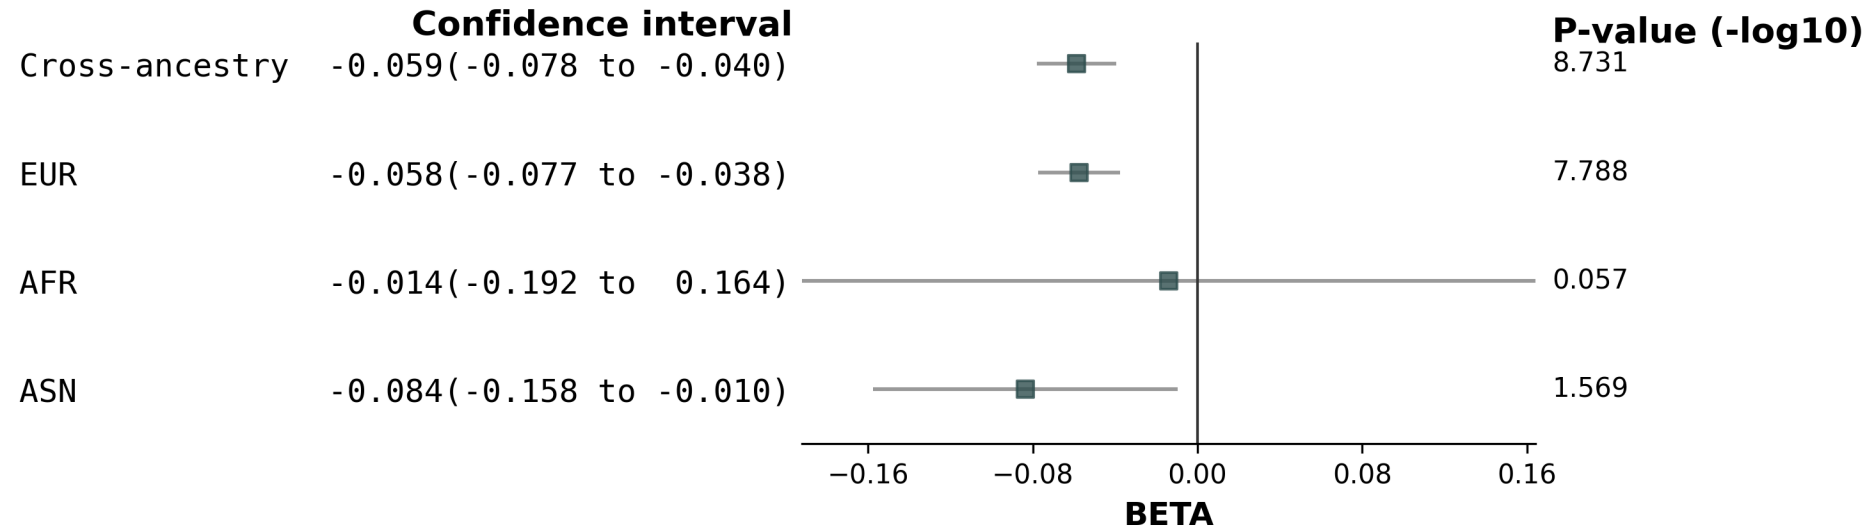

# auto\_GCC\_q2, rs765853102

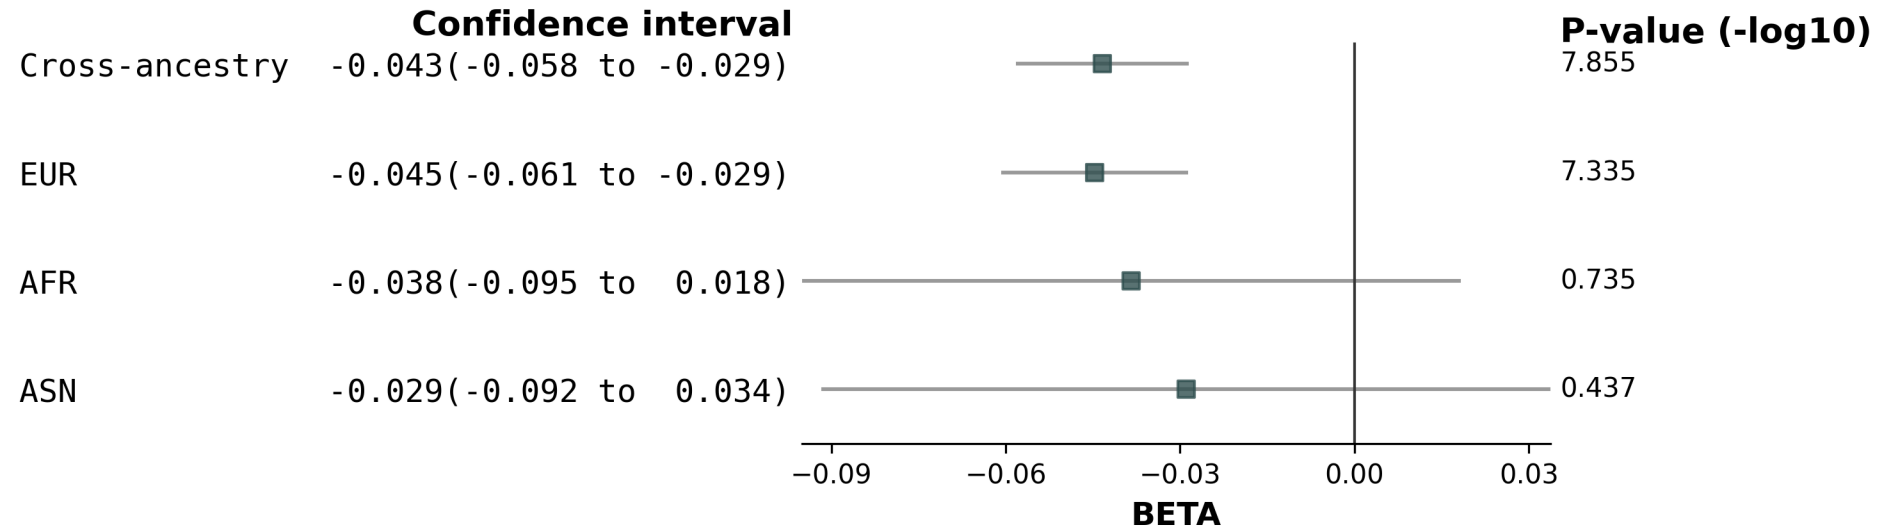



# auto\_GCC\_q3, 17:79614932\_TTAAC\_T

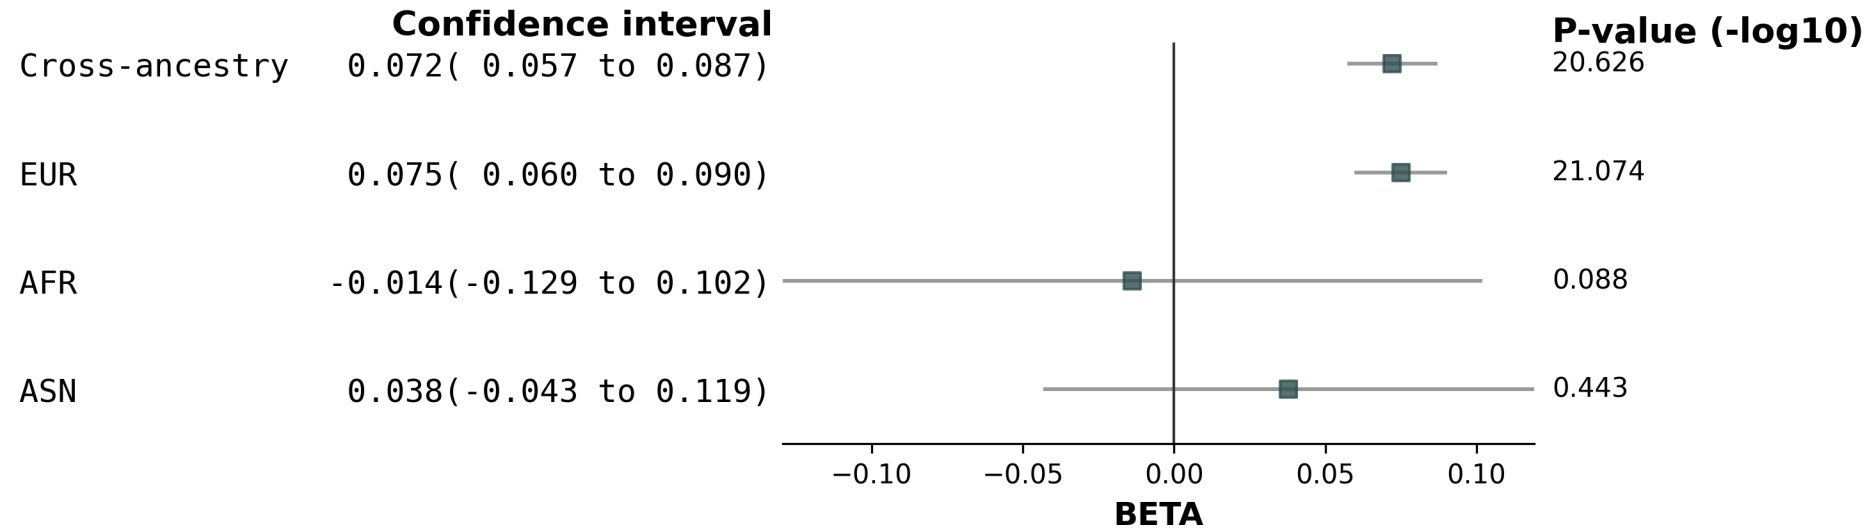

# auto\_GCC\_q3, rs1800407

**Confidence interval**

**P-value (-log10)**

Cross-ancestry

0.082( 0.055 to 0.108)

8.943

EUR

0.082( 0.056 to 0.109)

8.907

ASN

0.051( -0.145 to 0.247)

0.213



# auto\_GCC\_q3, rs10933712

Confidence interval

P-value (-log10)

Cross-ancestry

-0.071(-0.096 to -0.046)

7.717

EUR

-0.071(-0.098 to -0.045)

6.81

AFR

-0.089(-0.179 to -0.000)

1.303

ASN

-0.043(-0.149 to 0.063)

0.37

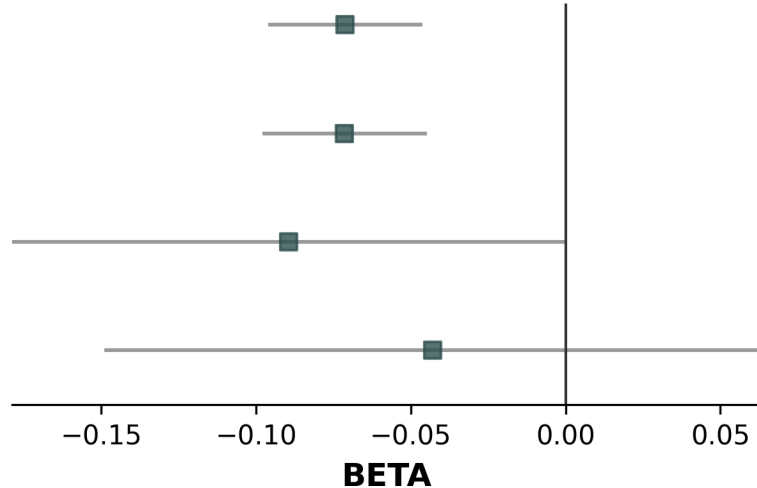

# auto\_GCC\_q3, rs72855624

**Confidence interval**

**P-value (-log10)**

Cross-ancestry

-0.073 (-0.095 to -0.052)

10.635

EUR

-0.078 (-0.101 to -0.055)

10.794

AFR

-0.029 (-0.112 to 0.055)

0.301

ASN

-0.038 (-0.145 to 0.068)

0.319

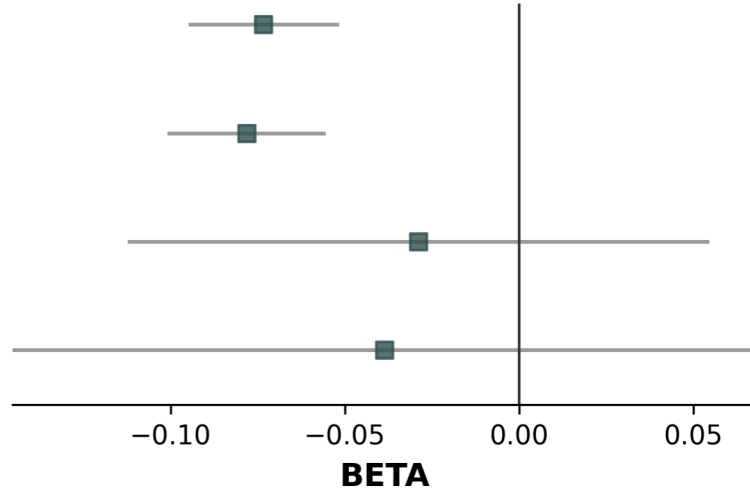

# auto\_GCC\_q4, rs1800407

**Confidence interval**

**P-value (-log10)**

Cross-ancestry

-0.074(-0.100 to -0.048)

7.53

EUR

-0.074(-0.101 to -0.048)

7.599

ASN

-0.014(-0.221 to 0.193)

0.048

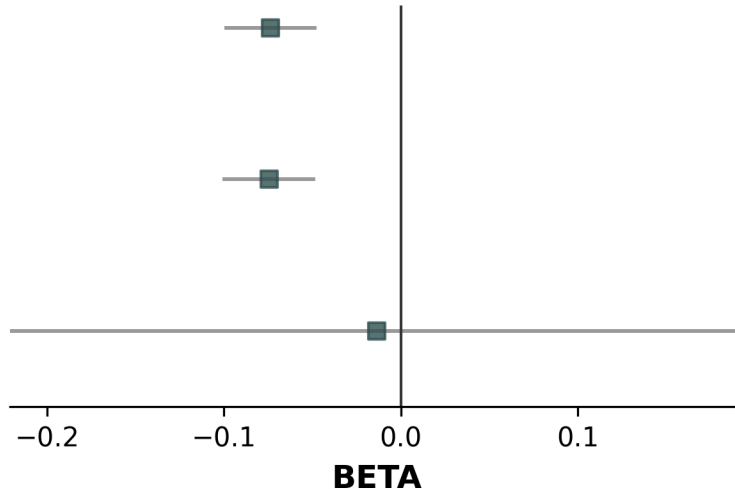

# auto\_GCC\_q4, rs4327428

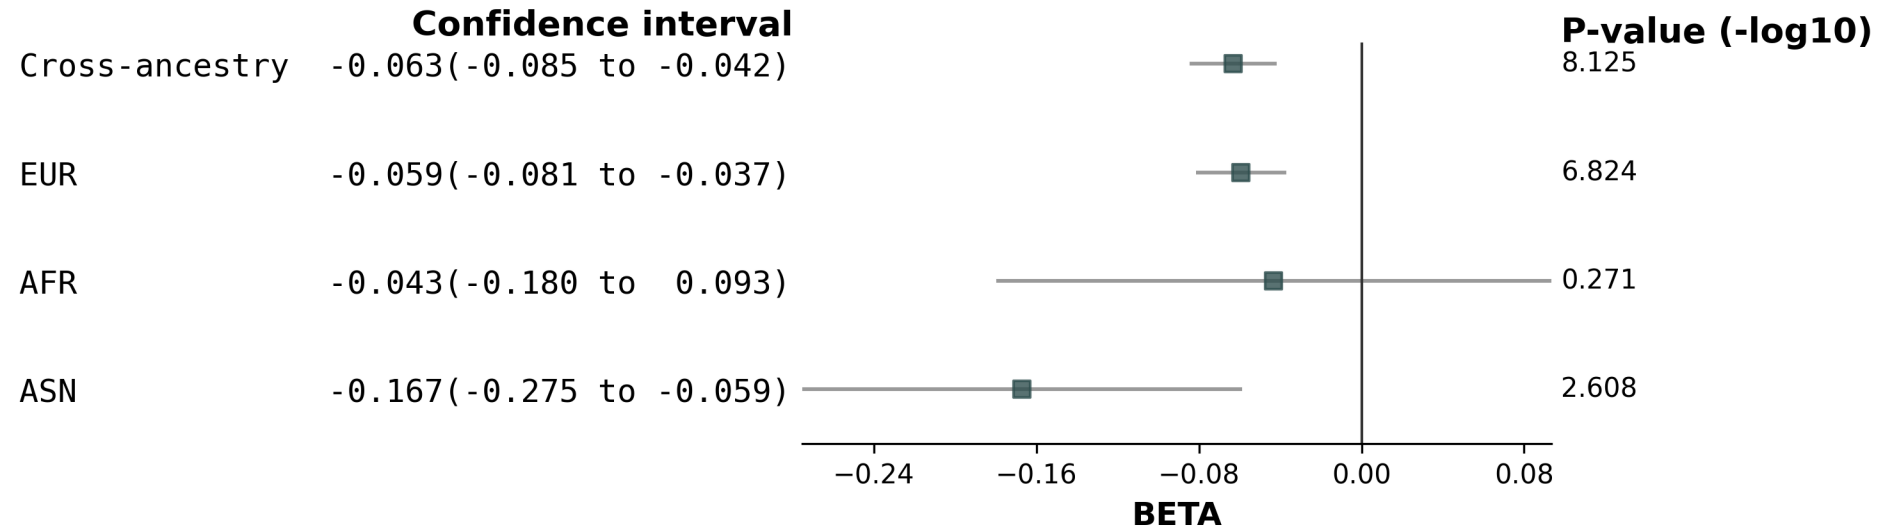

# auto\_GCC\_q4, rs4745956

**Confidence interval**

**P-value (-log10)**

Cross-ancestry

-0.051 (-0.067 to -0.035)

9.208

EUR

-0.053 (-0.070 to -0.036)

8.872

AFR

-0.045 (-0.118 to 0.028)

0.637

ASN

-0.027 (-0.097 to 0.042)

0.353

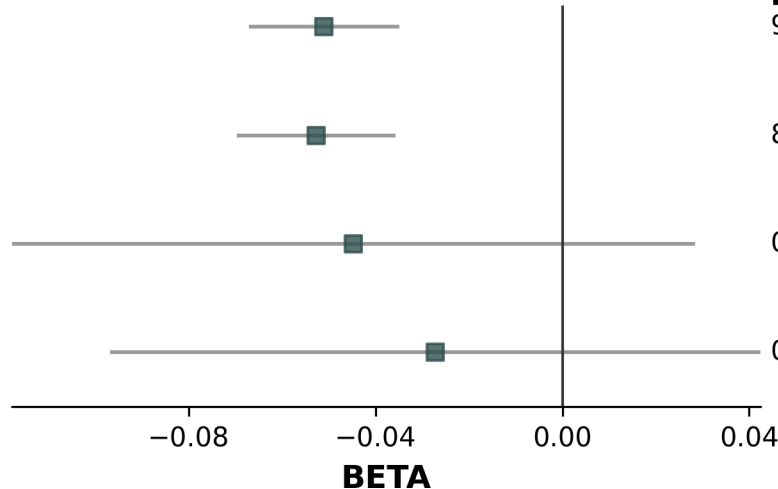

# auto\_GCC\_q4, rs35854280

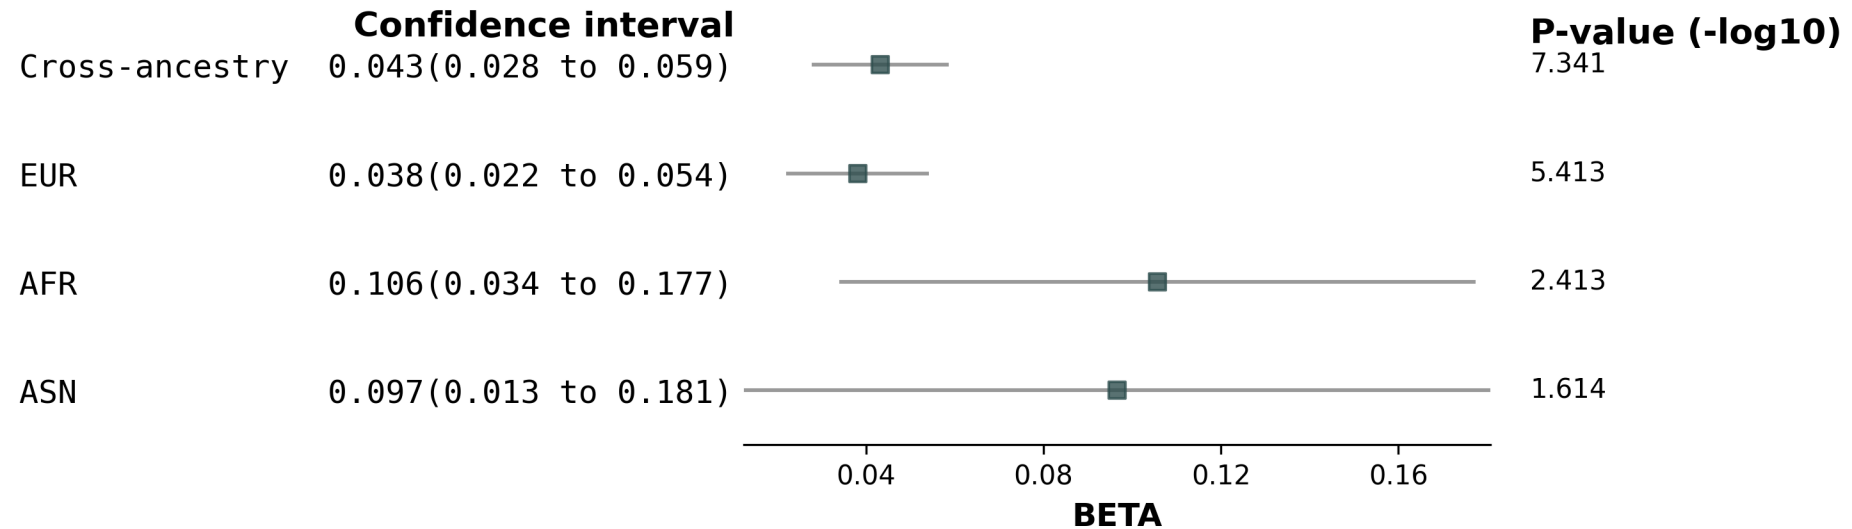



# auto\_GCC\_q4, rs56834952

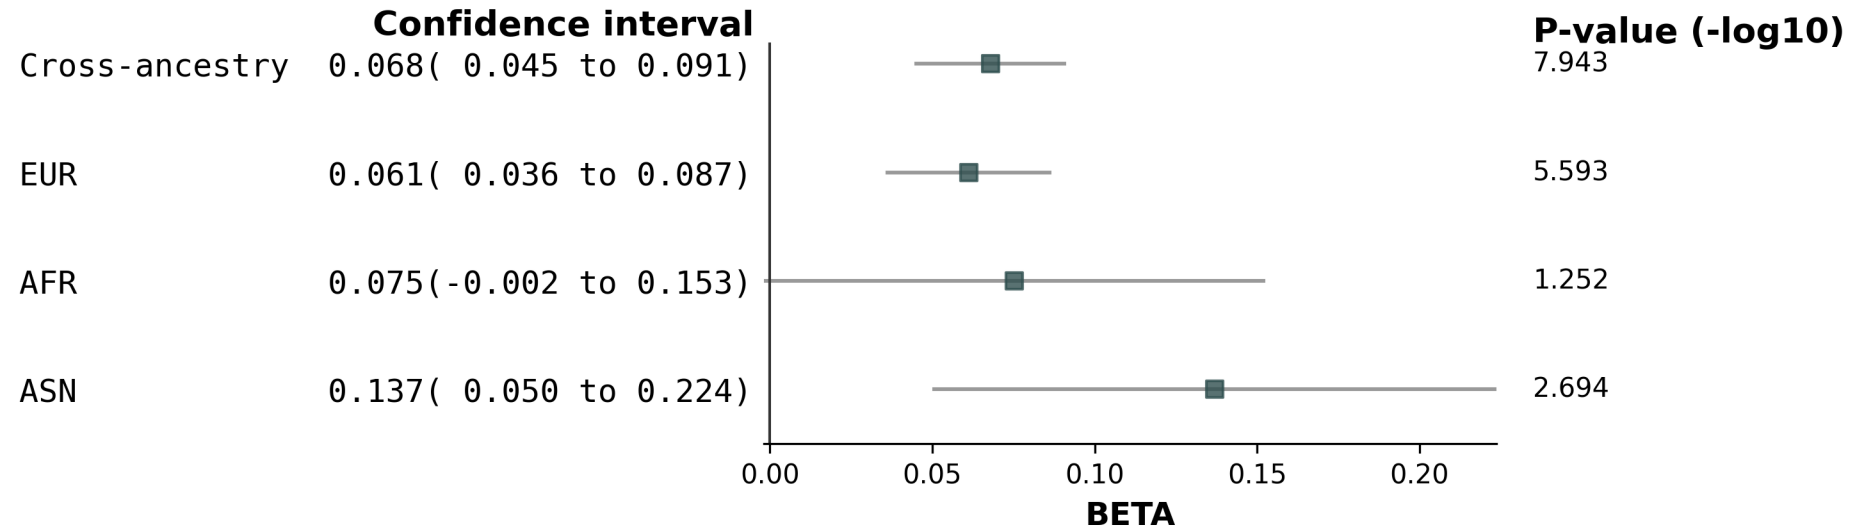

# auto\_GCC\_q4, rs61416912

**Confidence interval**

**P-value (-log10)**

Cross-ancestry

-0.069 (-0.093 to -0.044)

7.313

EUR

-0.069 (-0.095 to -0.043)

6.597

AFR

-0.103 (-0.196 to -0.011)

1.54

ASN

-0.010 (-0.121 to 0.102)

0.064

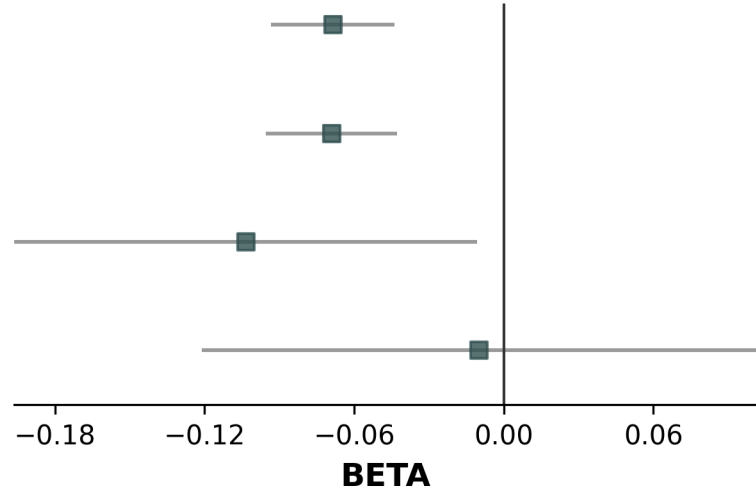

# auto\_GCC\_q4, rs62075722



# auto\_GCC\_q6, 2:145315140\_GGTGT\_G

Confidence interval

P-value (-log10)

Cross-ancestry

-0.043 (-0.058 to -0.028)

7.449

EUR

-0.045 (-0.061 to -0.030)

7.731

AFR

-0.016 (-0.094 to 0.061)

0.166

ASN

-0.004 (-0.084 to 0.075)

0.04



# auto\_GCC\_q6, rs561130827

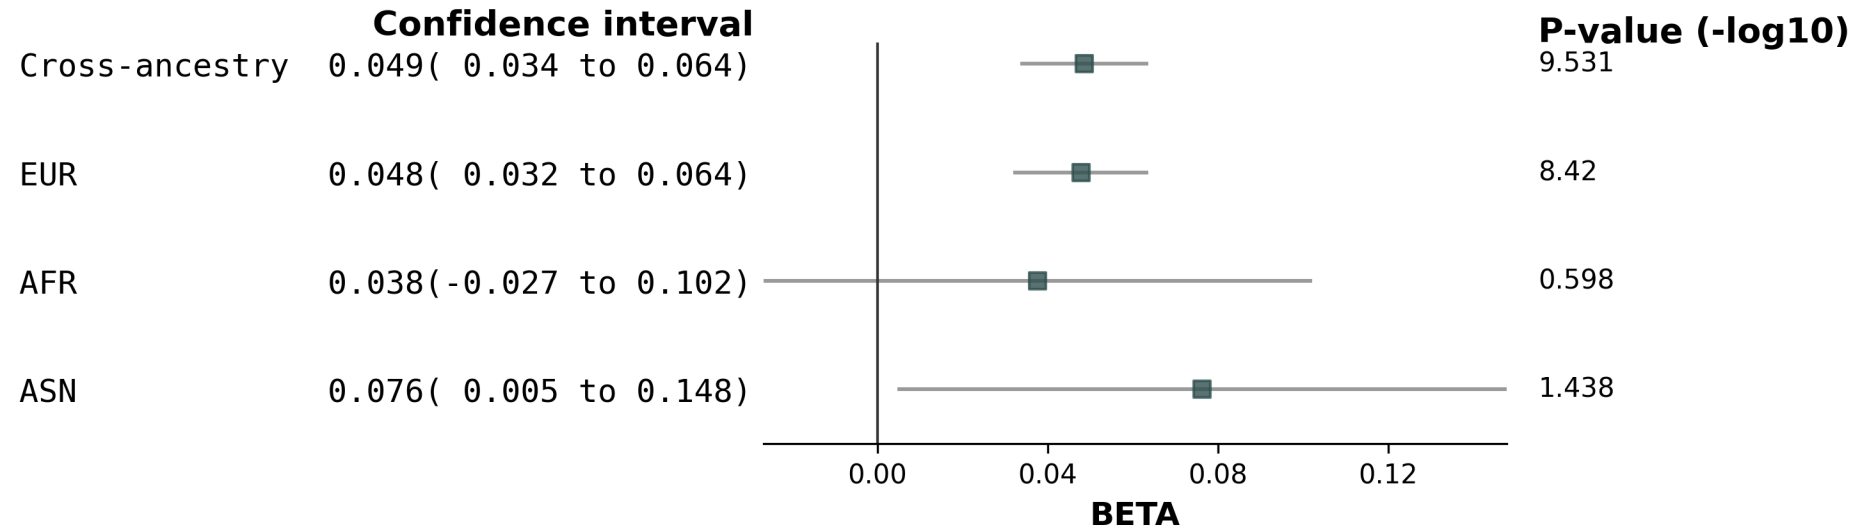

# auto\_GCC\_q8, 17:79614932\_TTAAC\_T

Confidence interval

P-value (-log10)

Cross-ancestry

-0.060 (-0.075 to -0.045)

14.444

EUR

-0.062 (-0.077 to -0.047)

14.767

AFR

0.007 (-0.108 to 0.122)

0.044

ASN

-0.029 (-0.113 to 0.056)

0.293



# auto\_GCC\_q8, rs4745956

**Confidence interval**

**P-value (-log10)**

Cross-ancestry

-0.049 (-0.065 to -0.032)

8.276

EUR

-0.049 (-0.066 to -0.032)

7.652

AFR

-0.067 (-0.139 to 0.005)

1.174

ASN

-0.020 (-0.089 to 0.048)

0.251

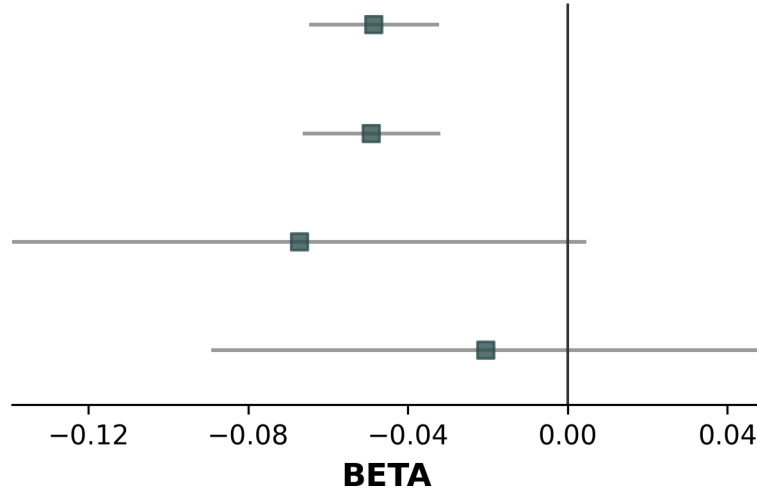

# auto\_GCC\_q8, rs58935441

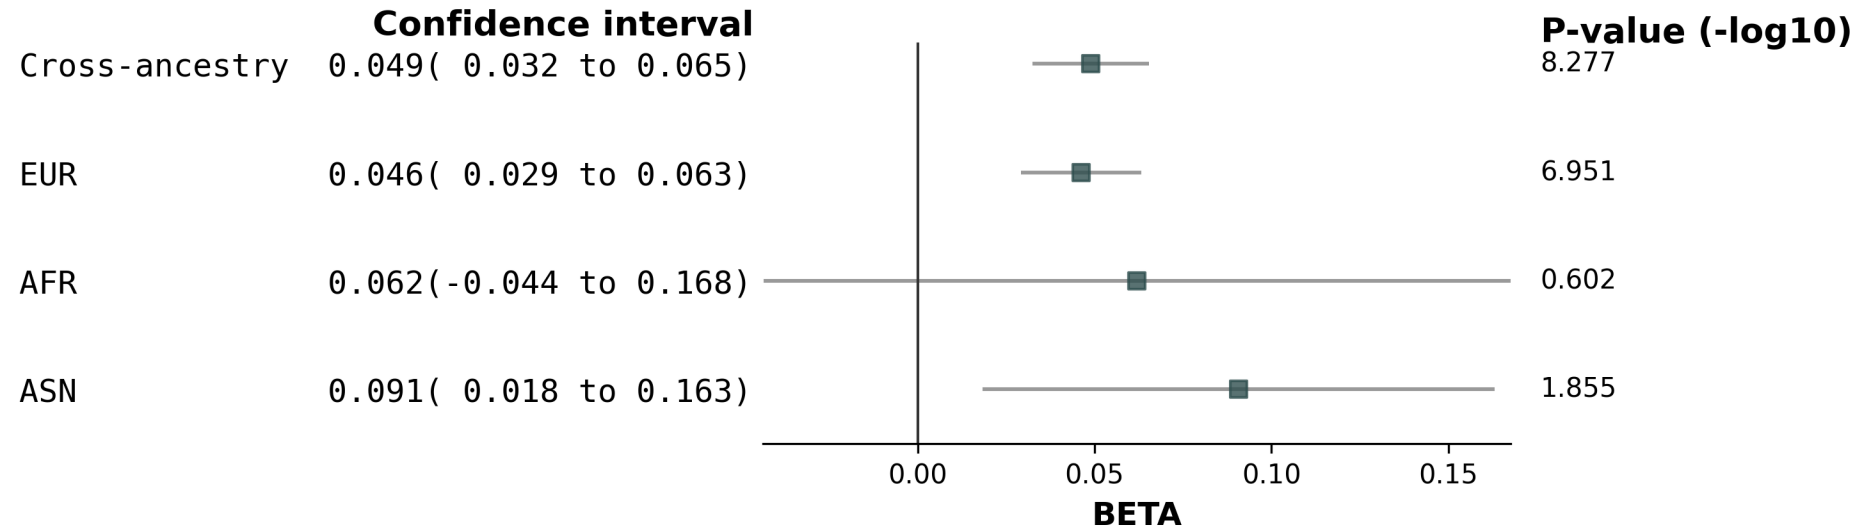



# auto\_GCC\_q8, rs61416912

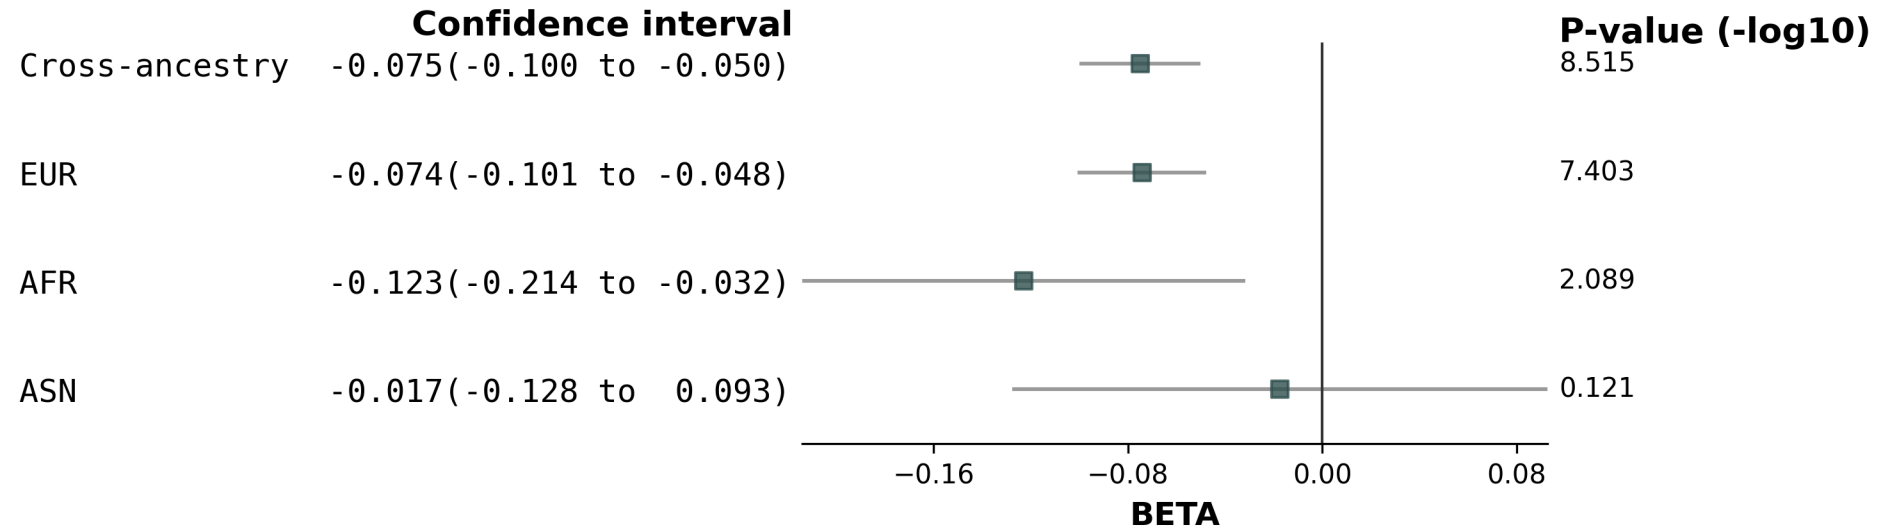

# auto\_GCC\_q8, rs72855624

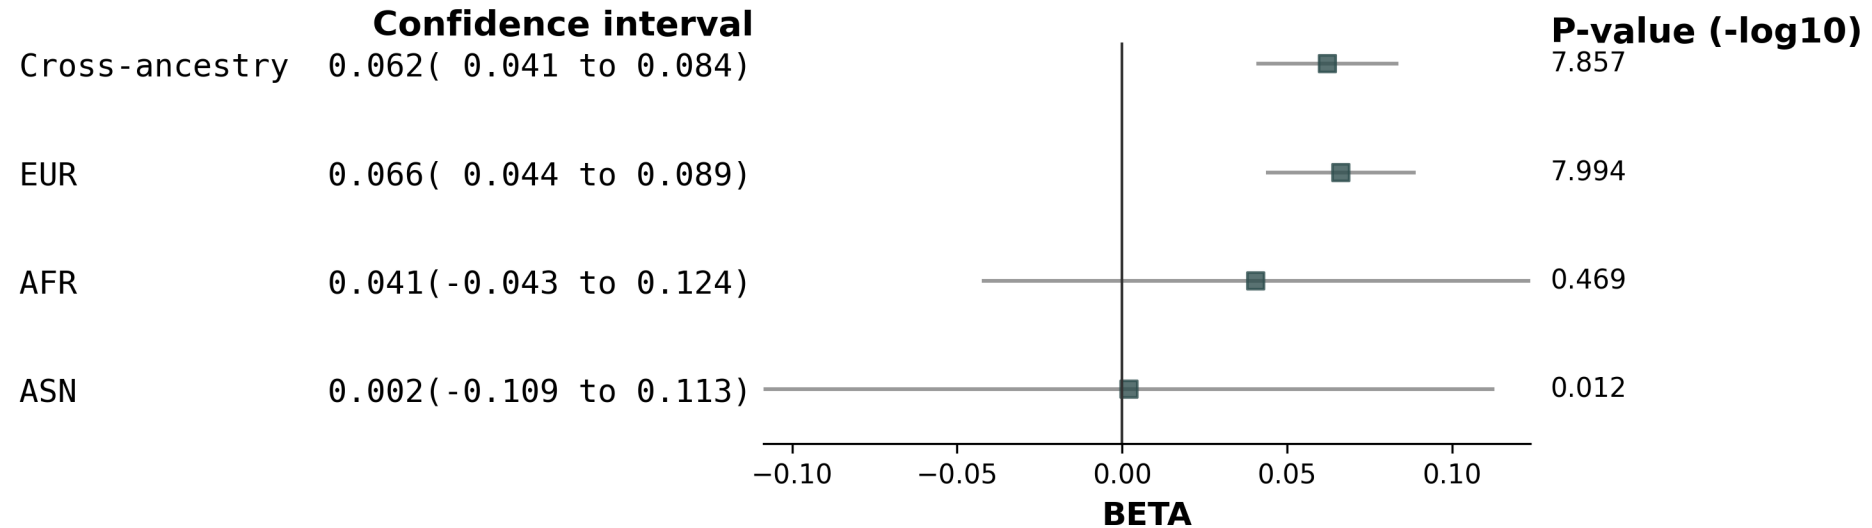

# auto\_GCC\_q10, 16:80430159\_CG\_C

Confidence interval

P-value (-log10)

Cross-ancestry

0.170( 0.113 to 0.228)

8.136

EUR

0.175( 0.115 to 0.235)

8.023

ASN

0.105( -0.117 to 0.328)

0.451



# auto\_GCC\_q10, rs3790912

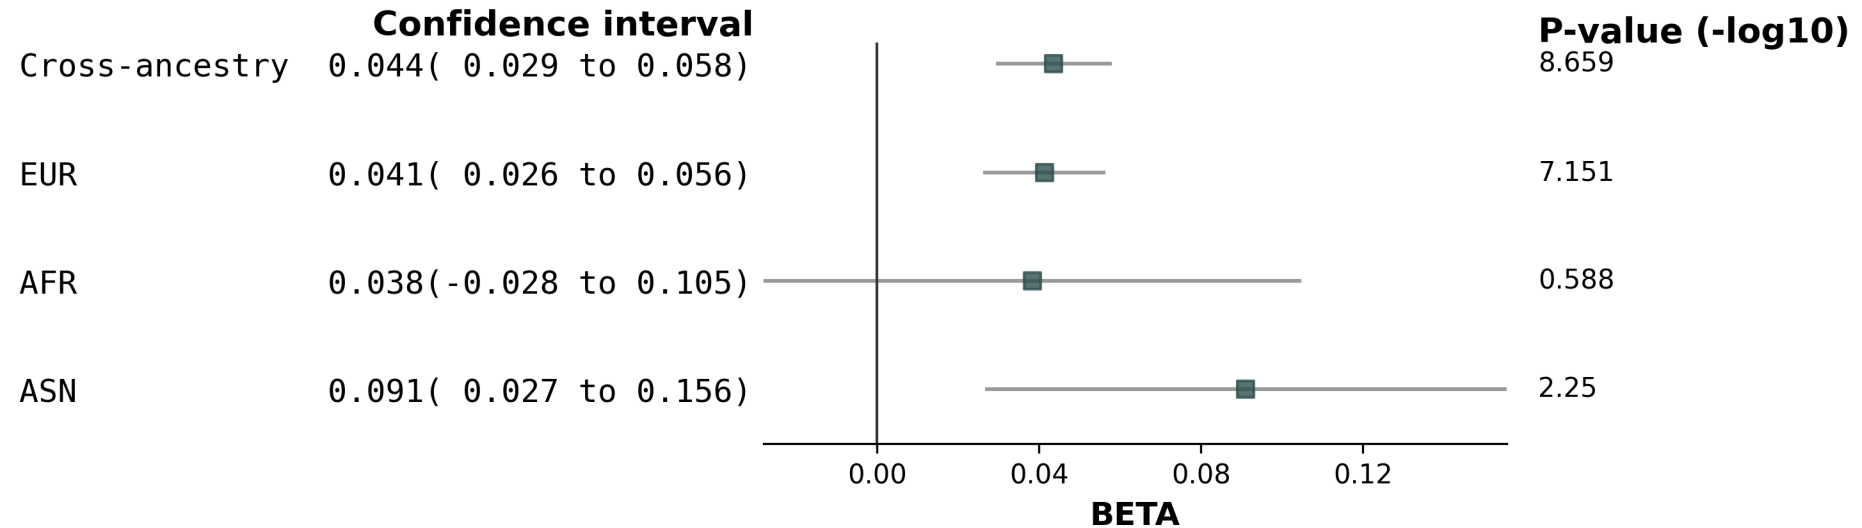

# auto\_GCC\_q10, rs35045925

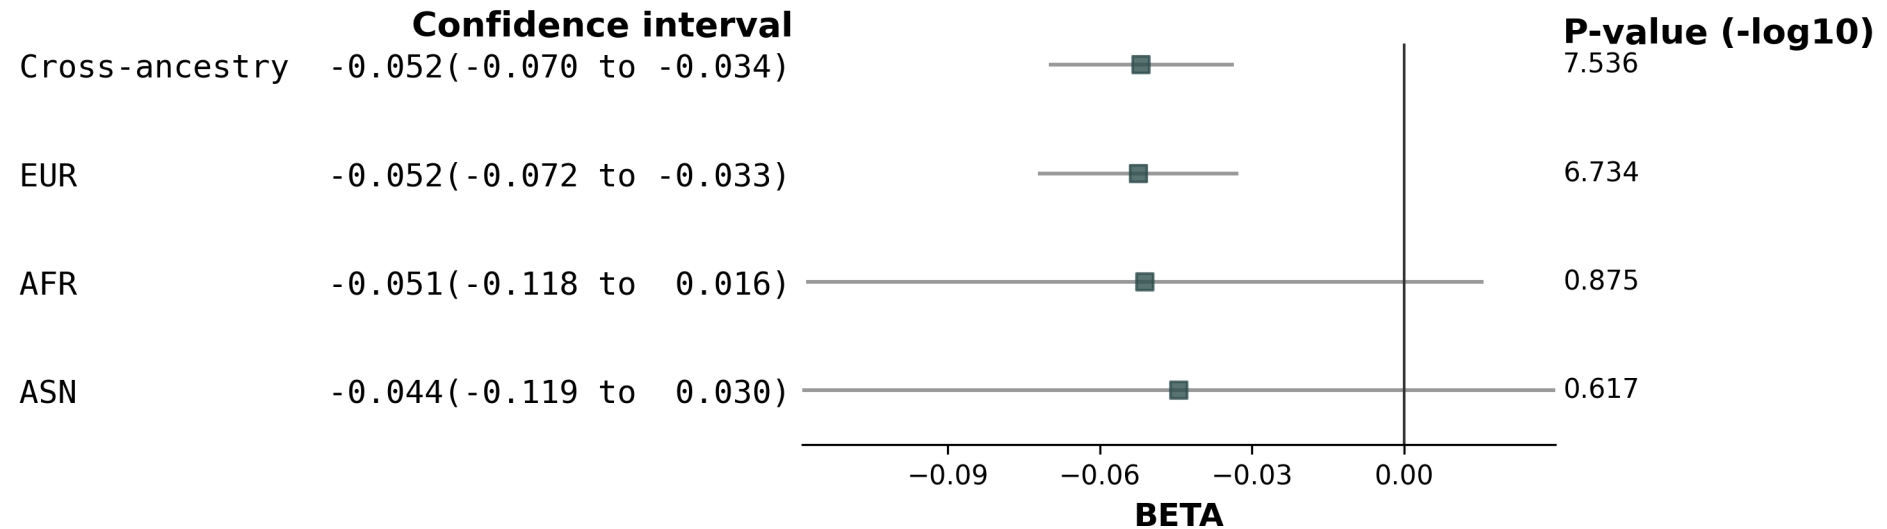

# auto\_RNFL\_q0, rs62172787

**Confidence interval**

**P-value (-log10)**

Cross-ancestry -0.138 (-0.187 to -0.088) 7.338

EUR -0.138 (-0.187 to -0.088) 7.338



**BETA**

# auto\_RNFL\_q1, rs3740587

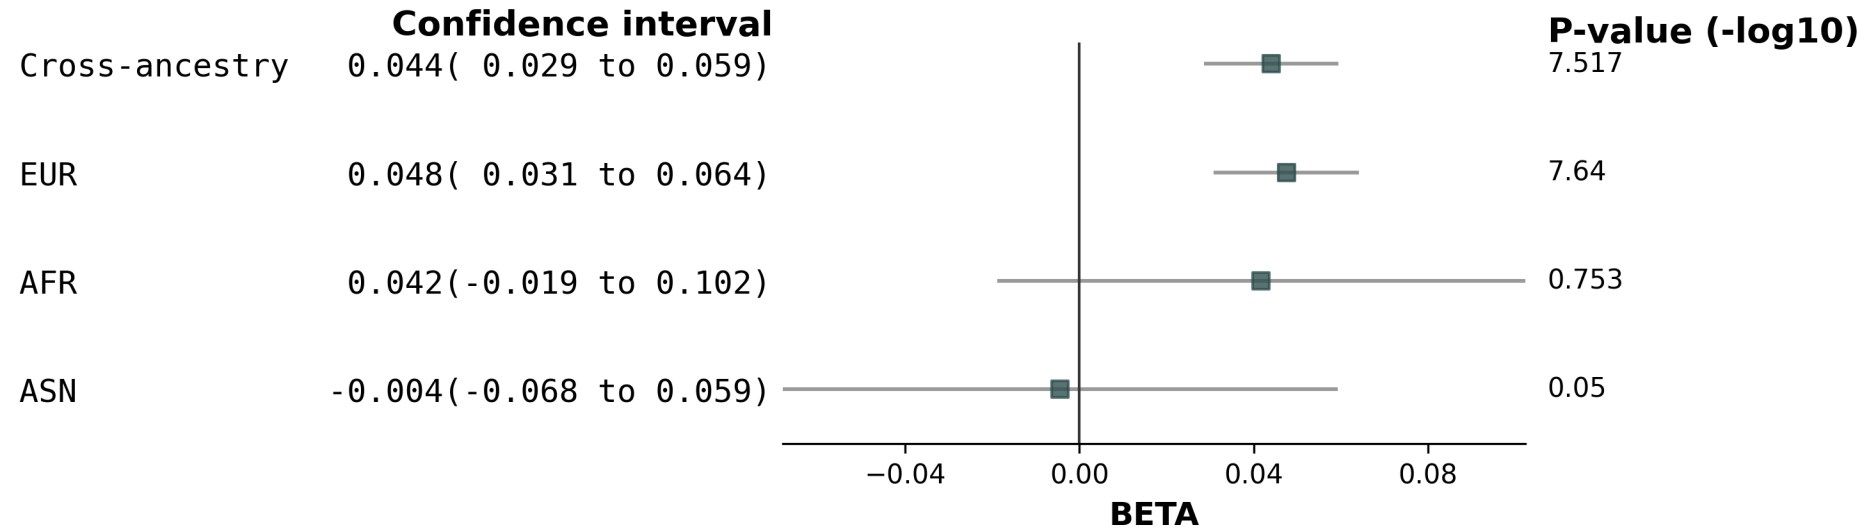

# auto\_RNFL\_q1, rs7816434

**Confidence interval**

**P-value (-log10)**

Cross-ancestry

-0.057 (-0.072 to -0.041)

11.773

EUR

-0.061 (-0.077 to -0.044)

11.929

AFR

0.016 (-0.044 to 0.076)

0.223

ASN

-0.083 (-0.152 to -0.013)

1.703

-0.15

-0.10

-0.05

0.00

0.05

**BETA**

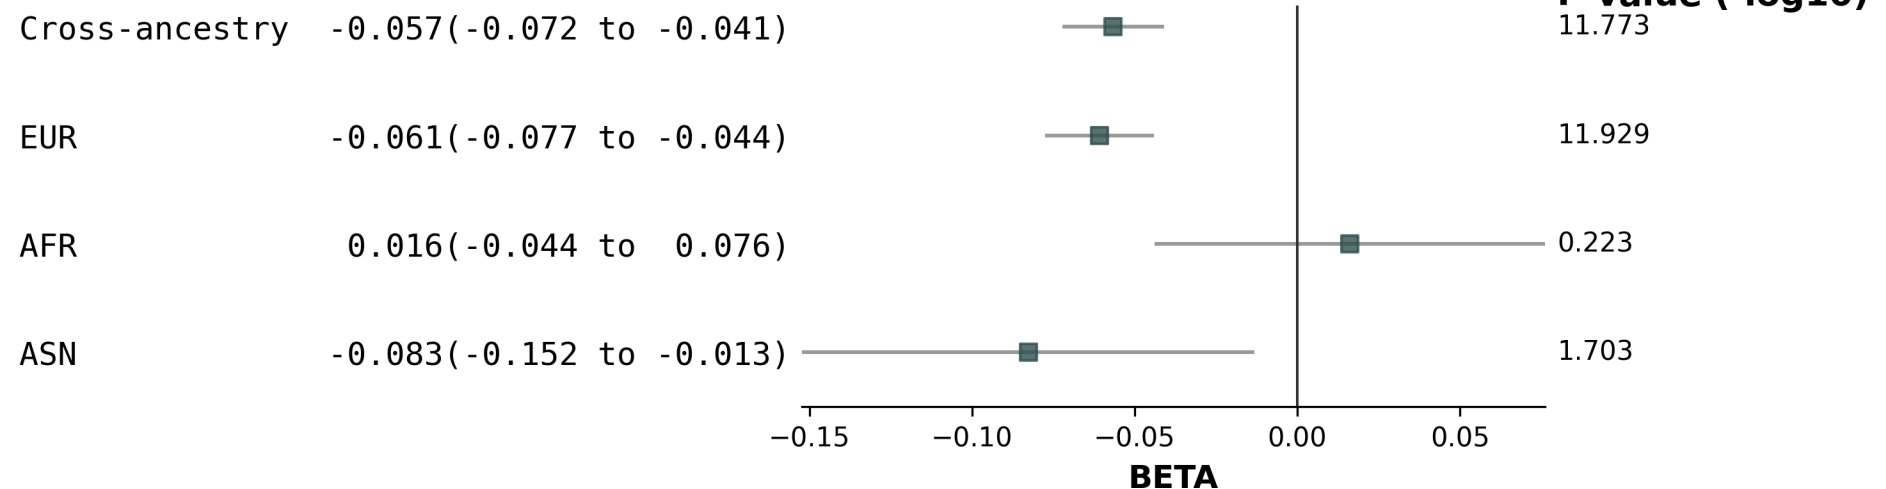



# auto\_RNFL\_q1, rs45569432

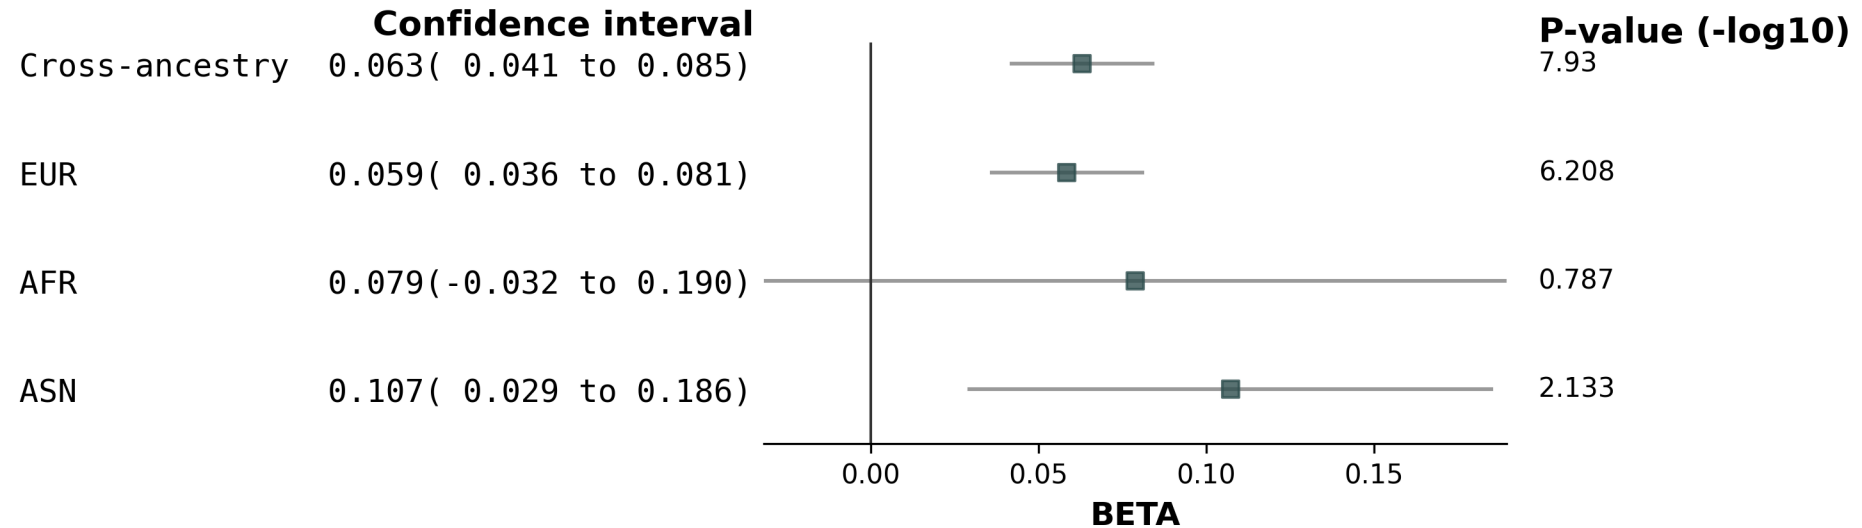

# auto\_RNFL\_q3, rs3740587

**Confidence interval**

**P-value (-log10)**

Cross-ancestry

-0.070 (-0.086 to -0.054)

17.456

EUR

-0.073 (-0.089 to -0.056)

17.305

AFR

-0.017 (-0.092 to 0.057)

0.186

ASN

-0.063 (-0.140 to 0.014)

0.963

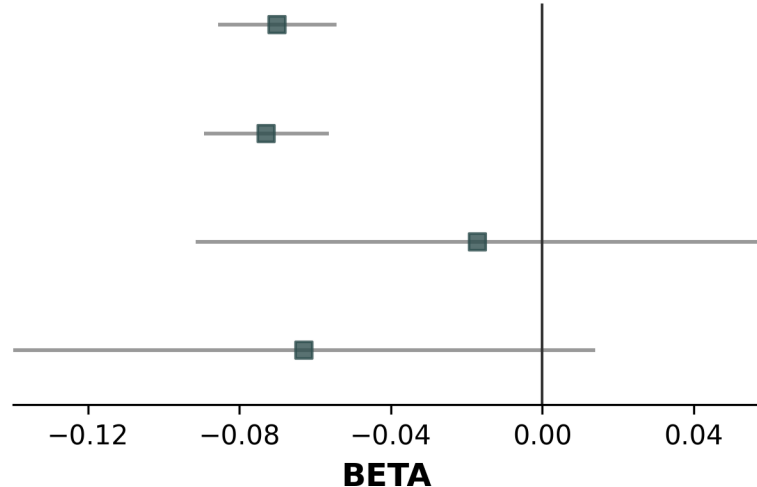

# auto\_RNFL\_q3, rs6042789

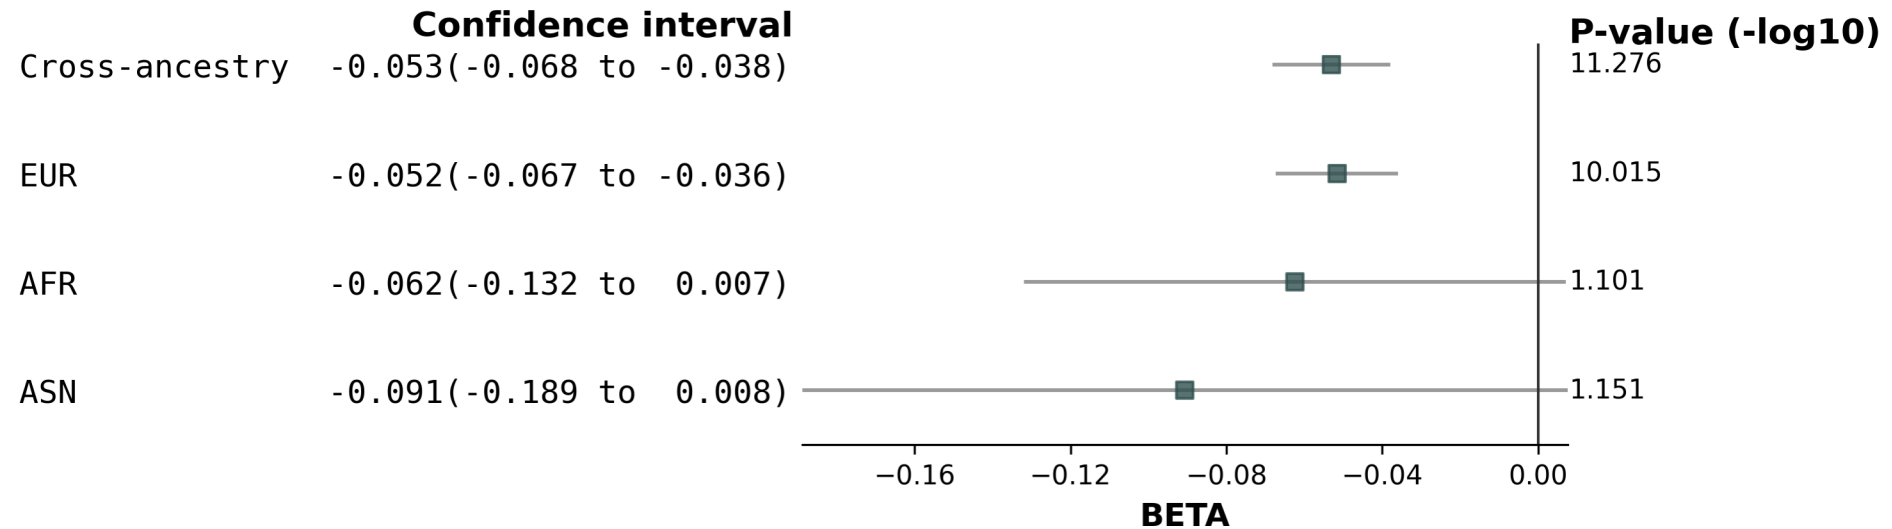

# auto\_RNFL\_q3, rs6469169

**Confidence interval**

**P-value (-log10)**

Cross-ancestry

-0.048 (-0.064 to -0.032)

8.14

EUR

-0.049 (-0.066 to -0.032)

7.91

AFR

-0.033 (-0.104 to 0.037)

0.449

ASN

-0.031 (-0.114 to 0.053)

0.327

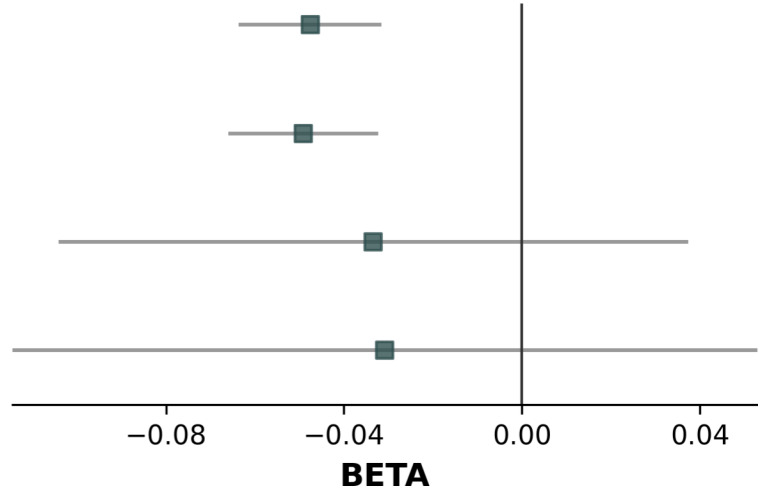

# auto\_RNFL\_q3, rs28711886

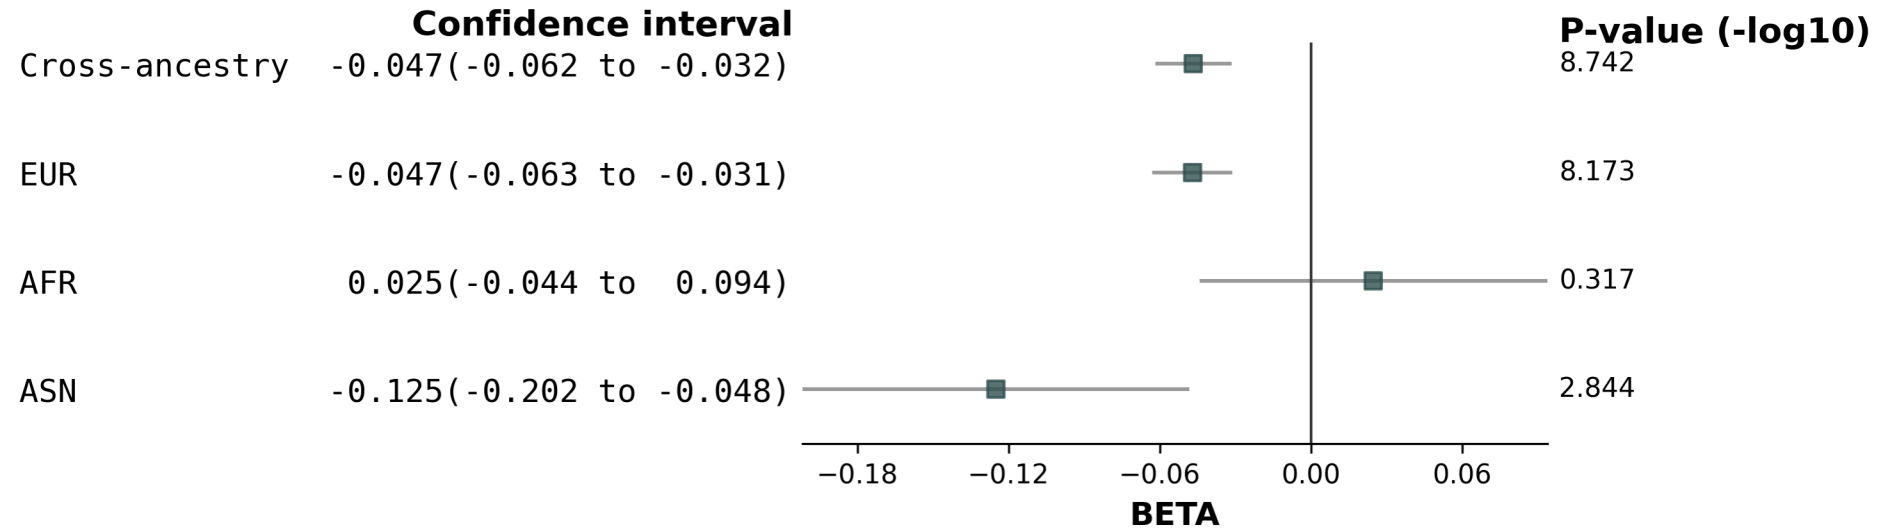

# auto\_RNFL\_q4, rs3740587

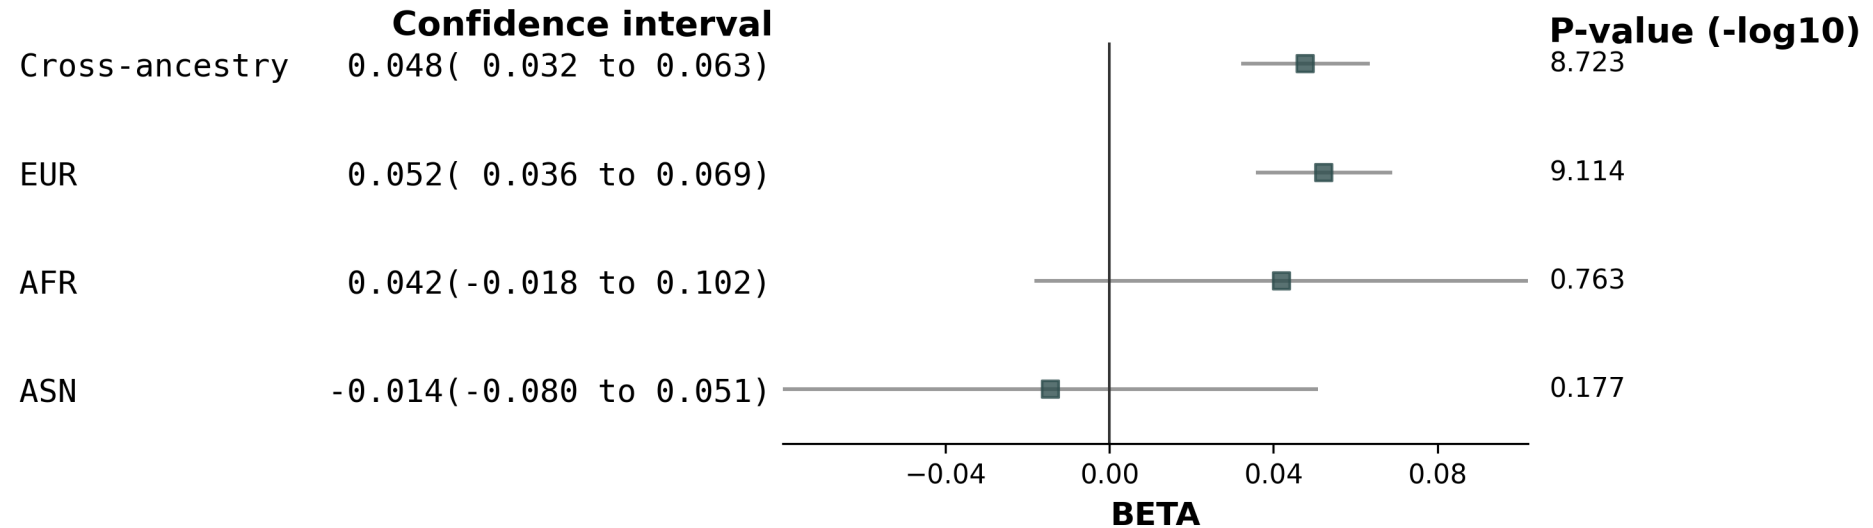

# auto\_RNFL\_q4, rs7816434

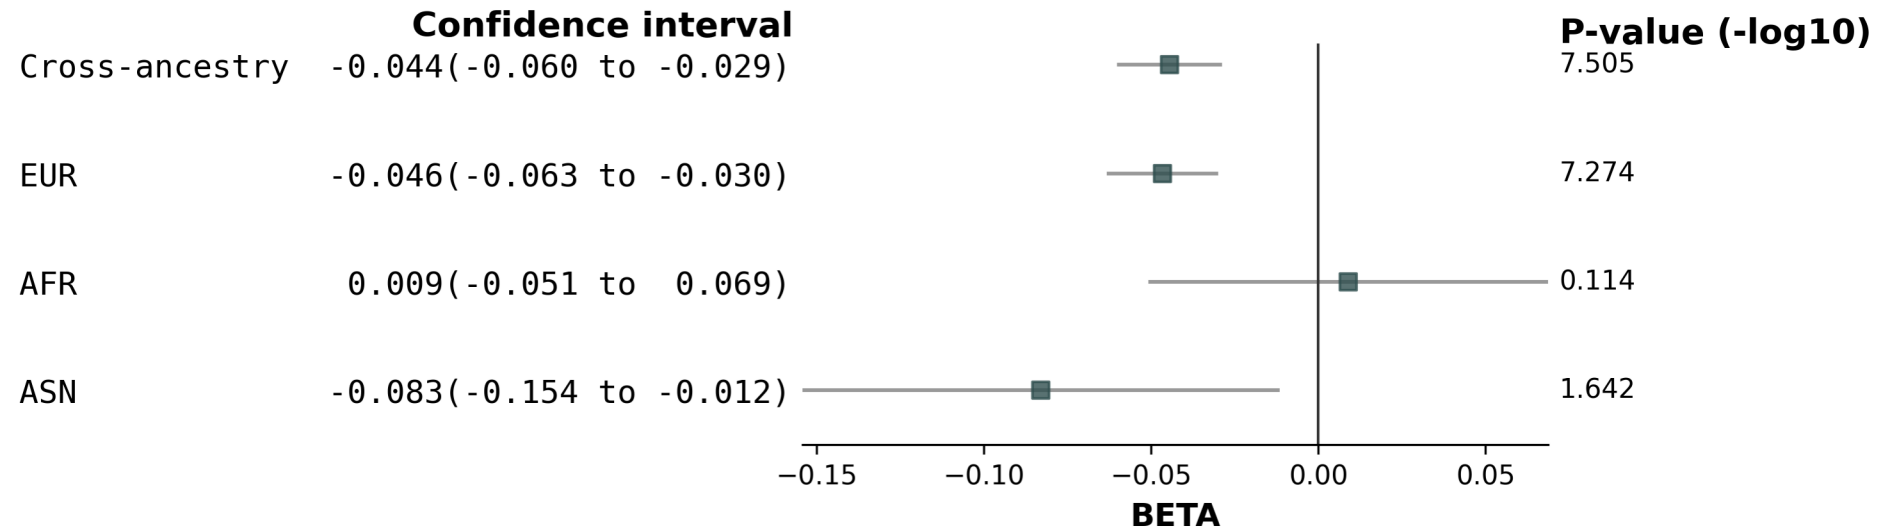

# auto\_RNFL\_q4, rs12074133

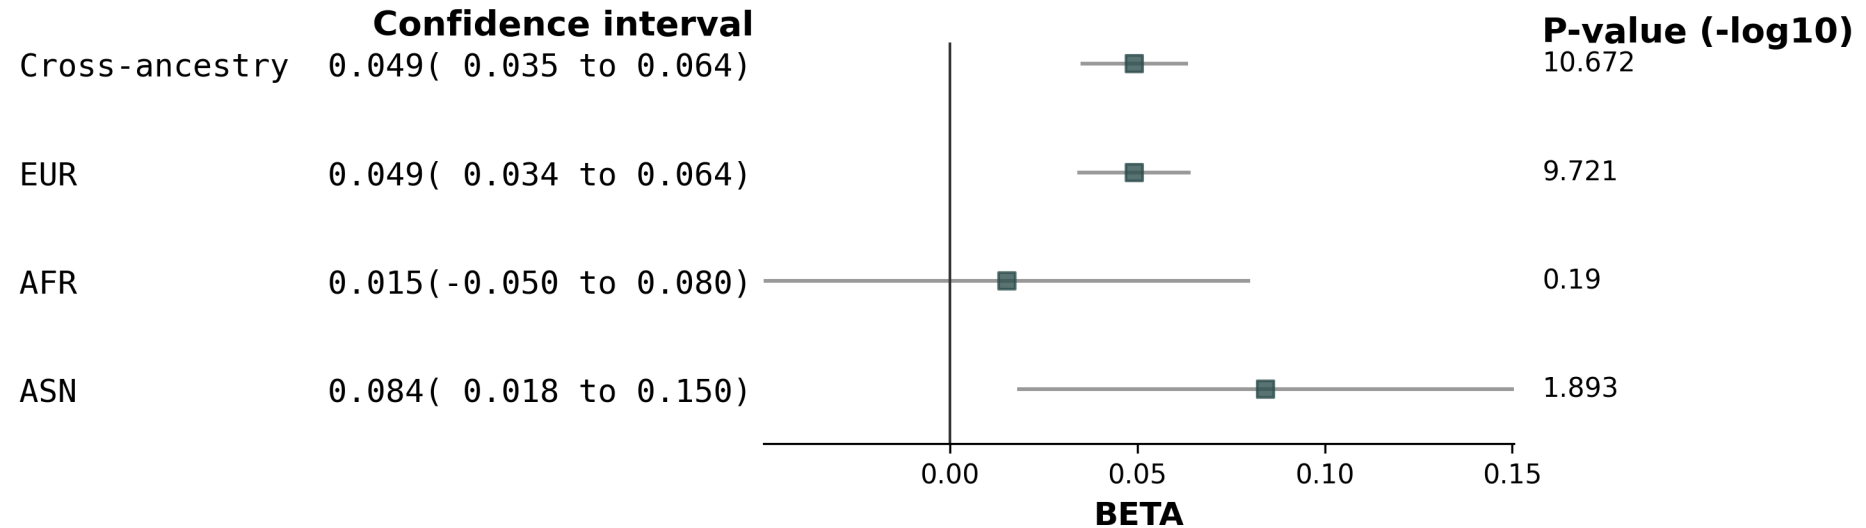



# auto\_RNFL\_q4, rs56834952

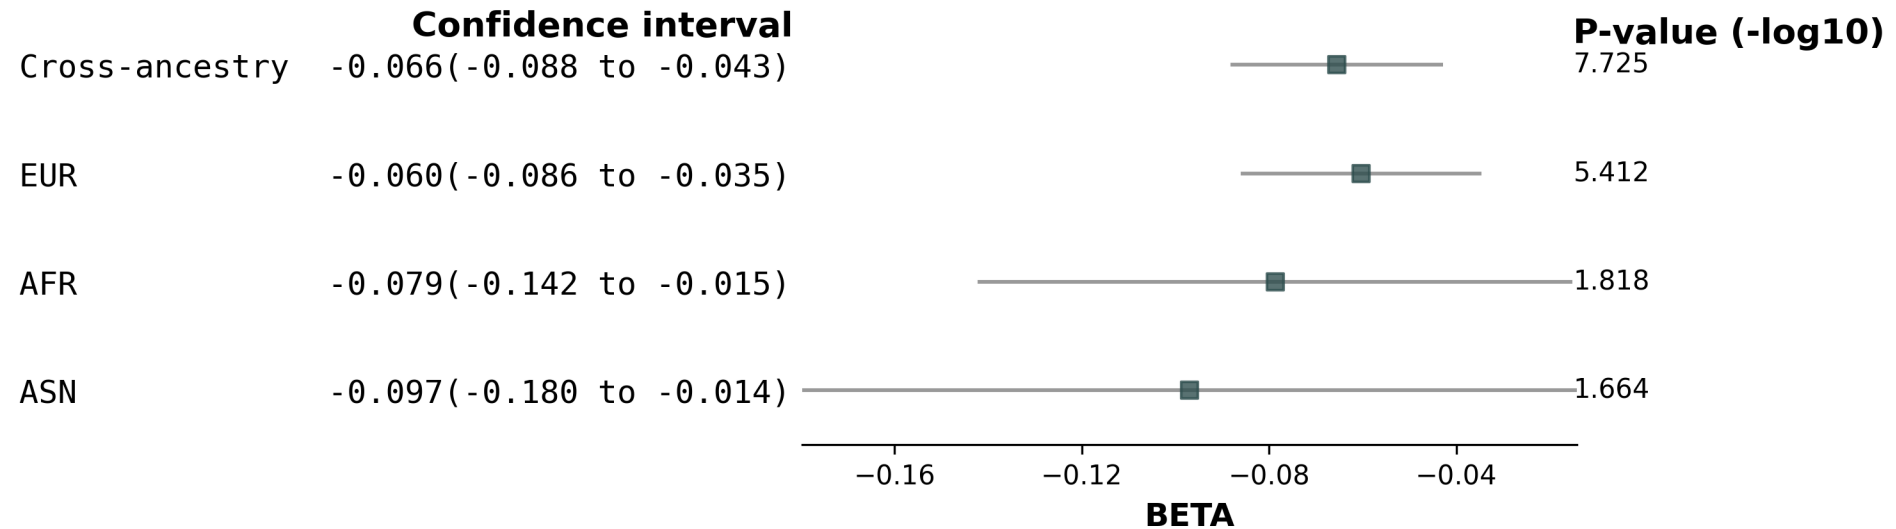

# auto\_RNFL\_q4, rs72725929

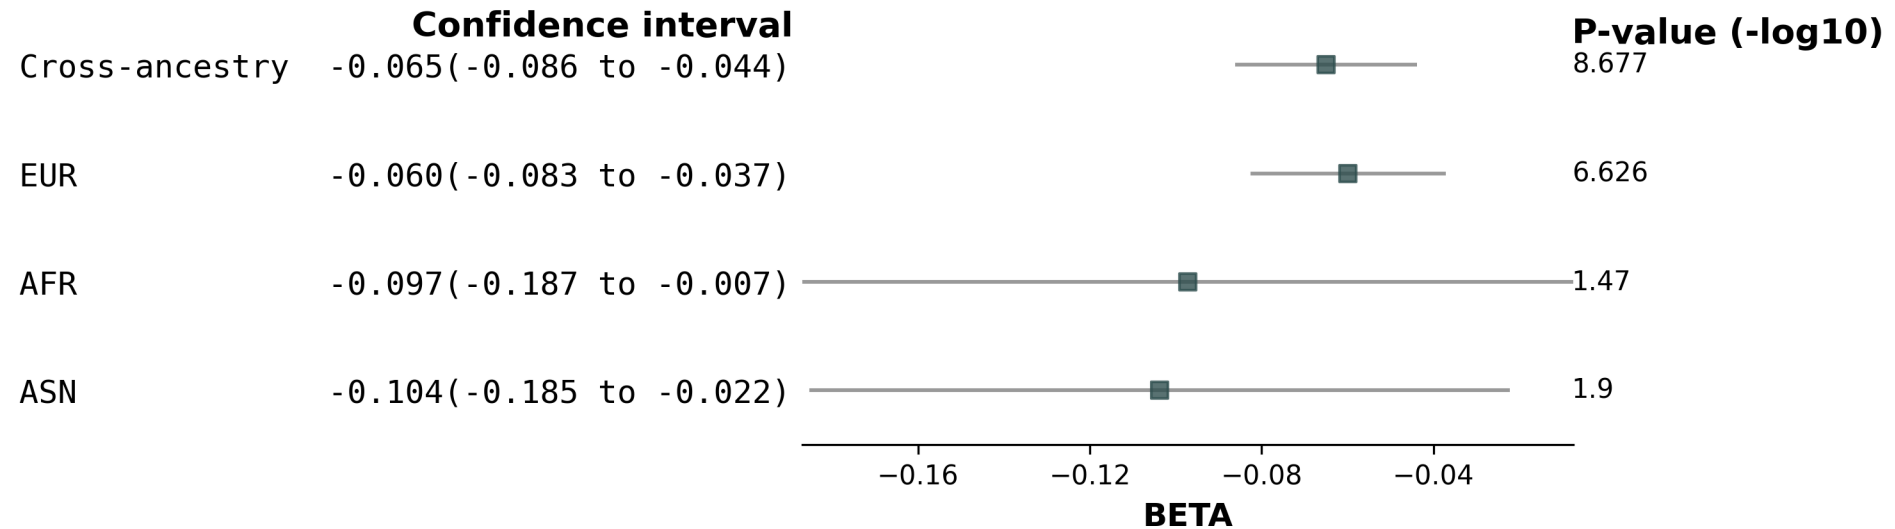

# auto\_RNFL\_q6, 1:161386627\_AT\_A

Confidence interval

P-value (-log10)

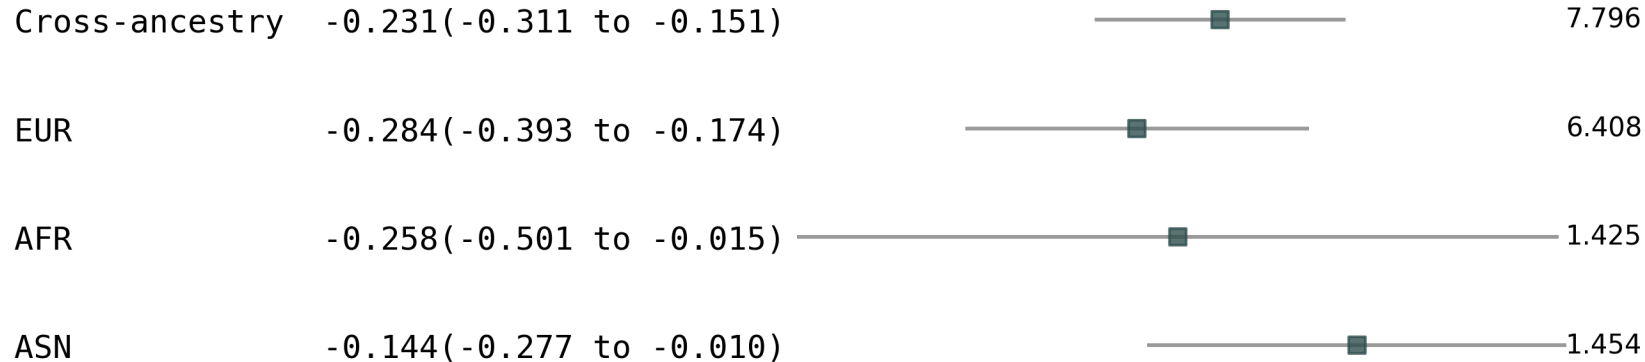

BETA

# auto\_RNFL\_q6, 14:61105917\_AT\_A

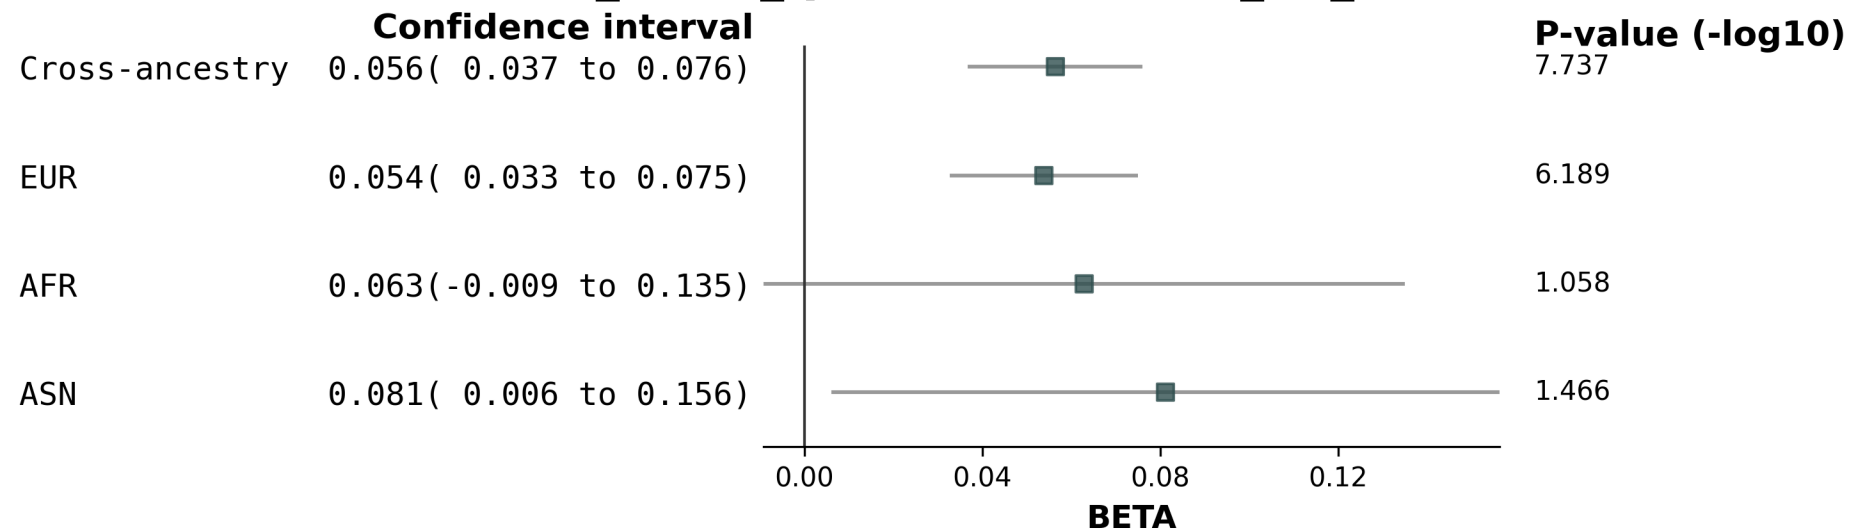

# auto\_RNFL\_q6, rs3740587

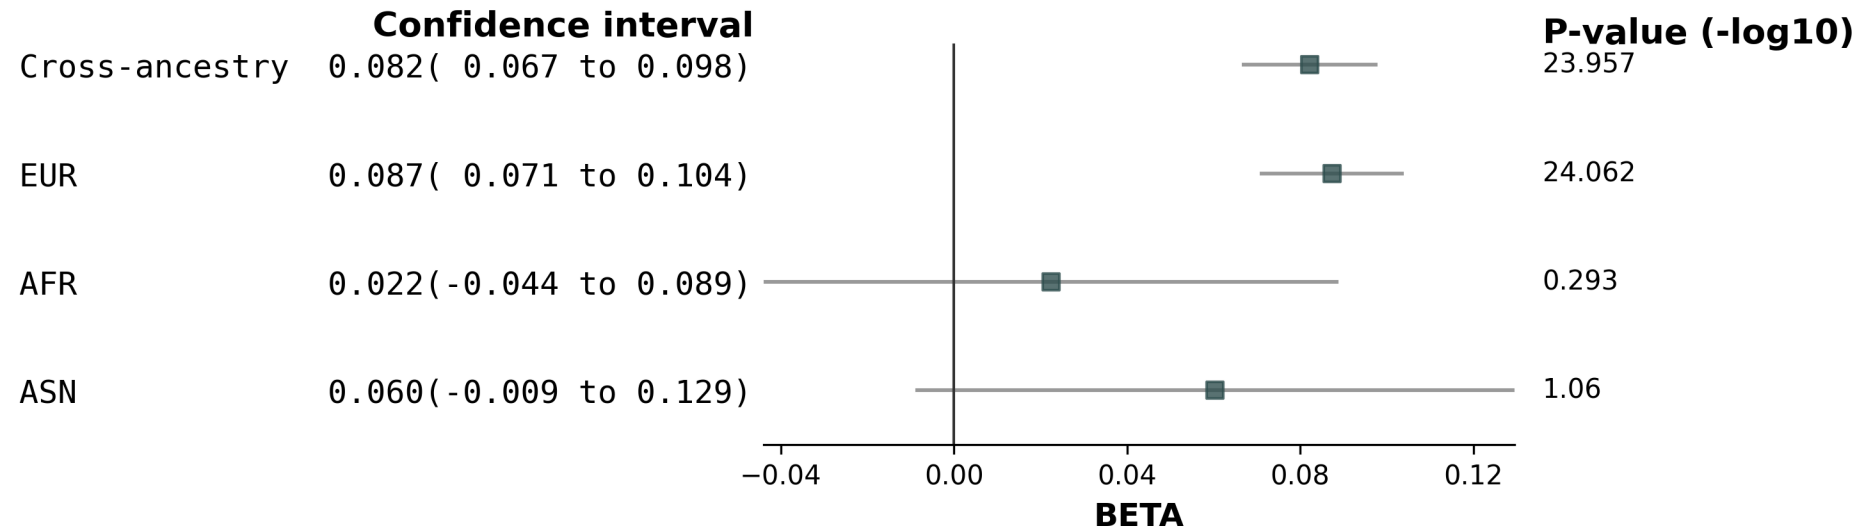

# auto\_RNFL\_q6, rs7829106

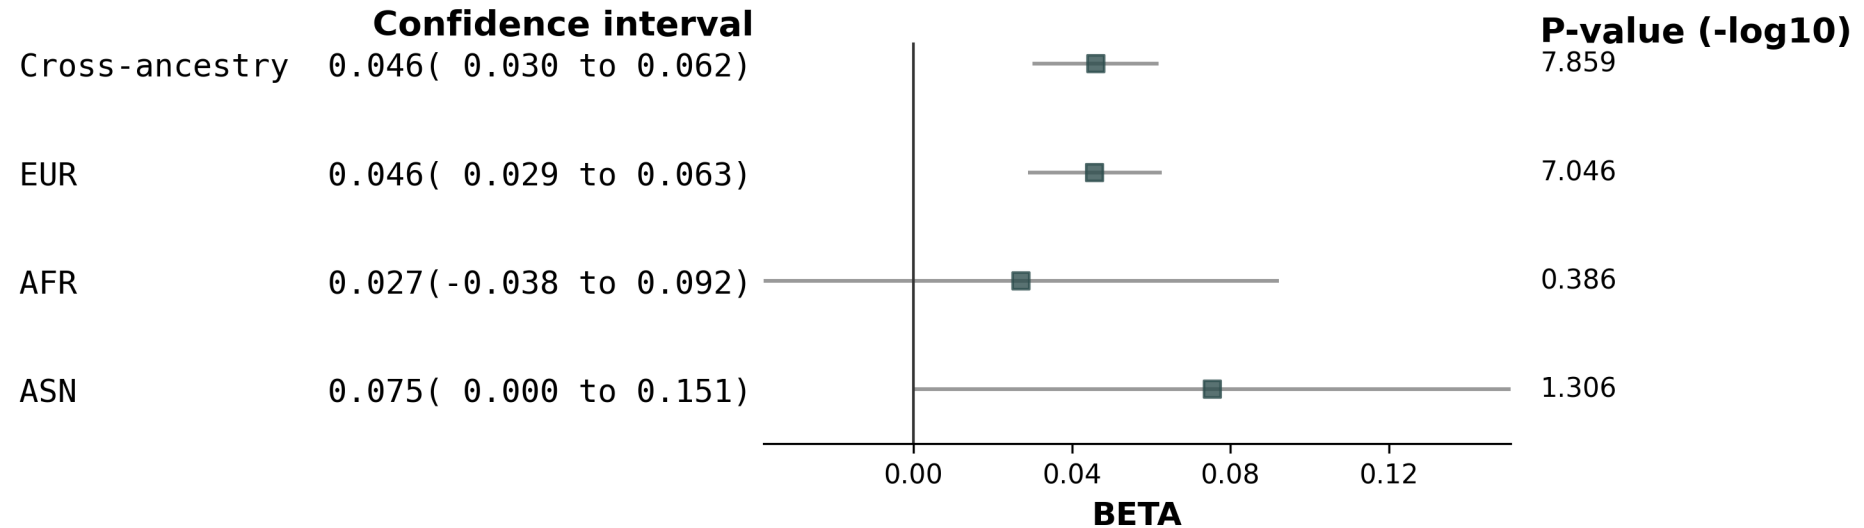

# auto\_RNFL\_q6, rs28711886

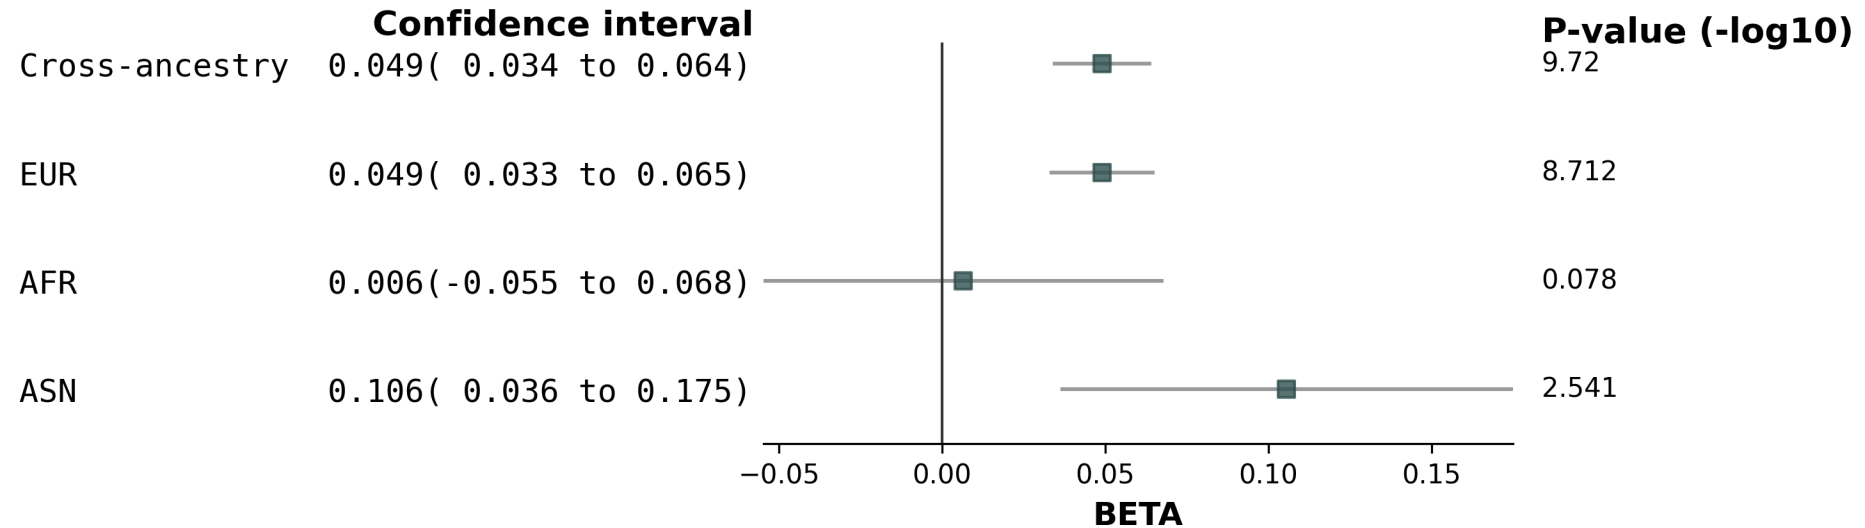

# auto\_RNFL\_q7, rs4814312

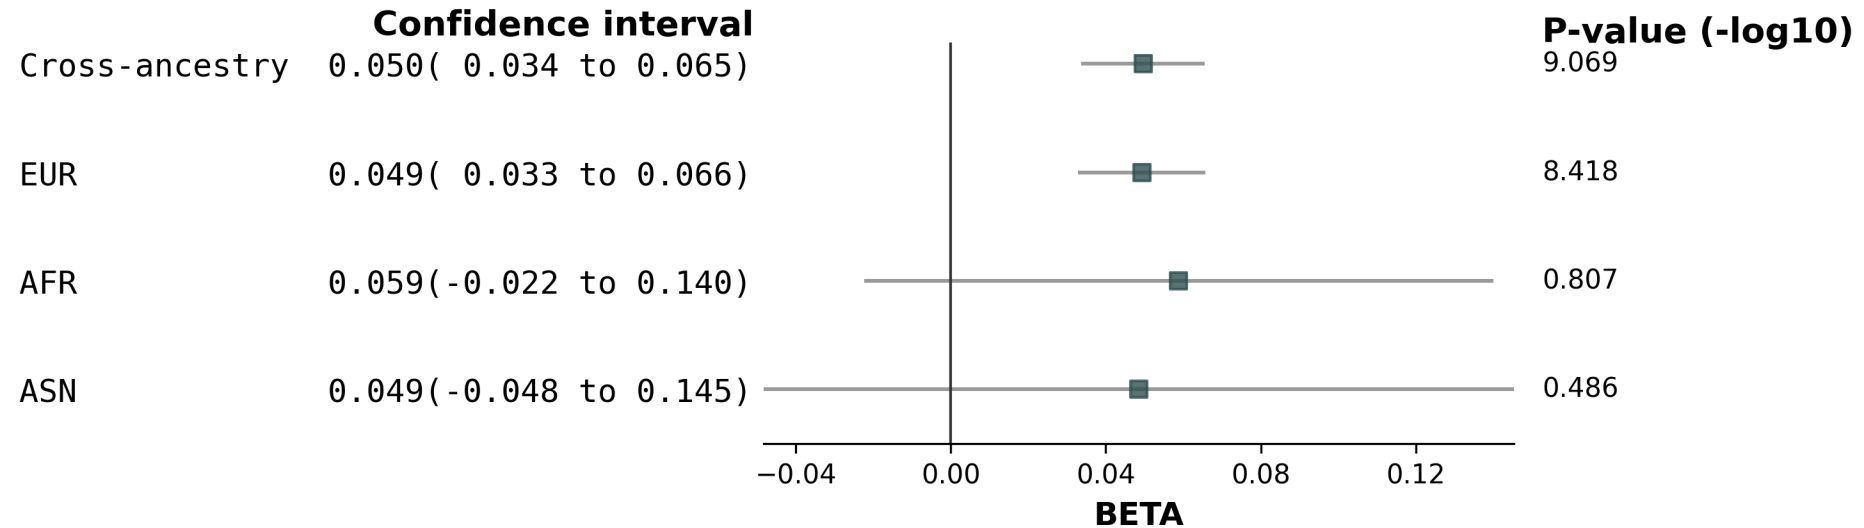



# auto\_RNFL\_q8, 10:69971810\_TAG\_T

Confidence interval

P-value (-log10)

Cross-ancestry

-0.056 (-0.074 to -0.037)

8.503

EUR

-0.056 (-0.075 to -0.037)

7.967

AFR

-0.076 (-0.200 to 0.047)

0.646

ASN

-0.048 (-0.140 to 0.043)

0.521

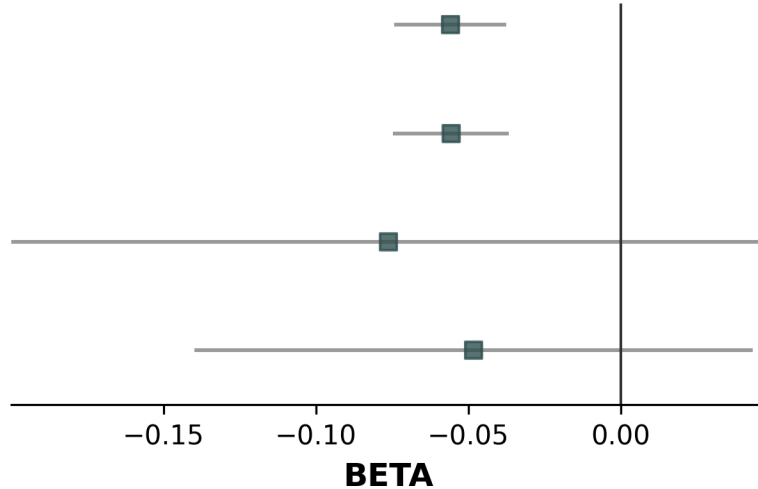

# moco\_GCC\_q3, 17:79614932\_TTAAC\_T

Confidence interval

P-value (-log10)

Cross-ancestry

-0.046 (-0.061 to -0.032)

9.017

EUR

-0.045 (-0.060 to -0.029)

8.054

AFR

-0.003 (-0.128 to 0.122)

0.016

ASN

-0.132 (-0.221 to -0.042)

2.404

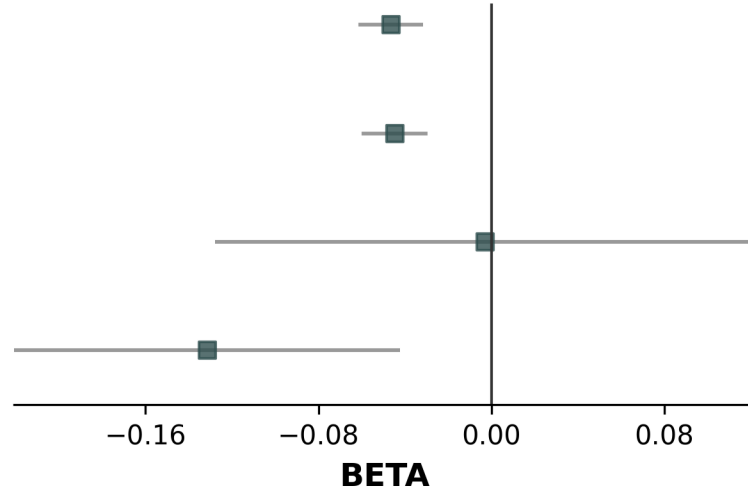

# moco\_GCC\_q3, rs4745956

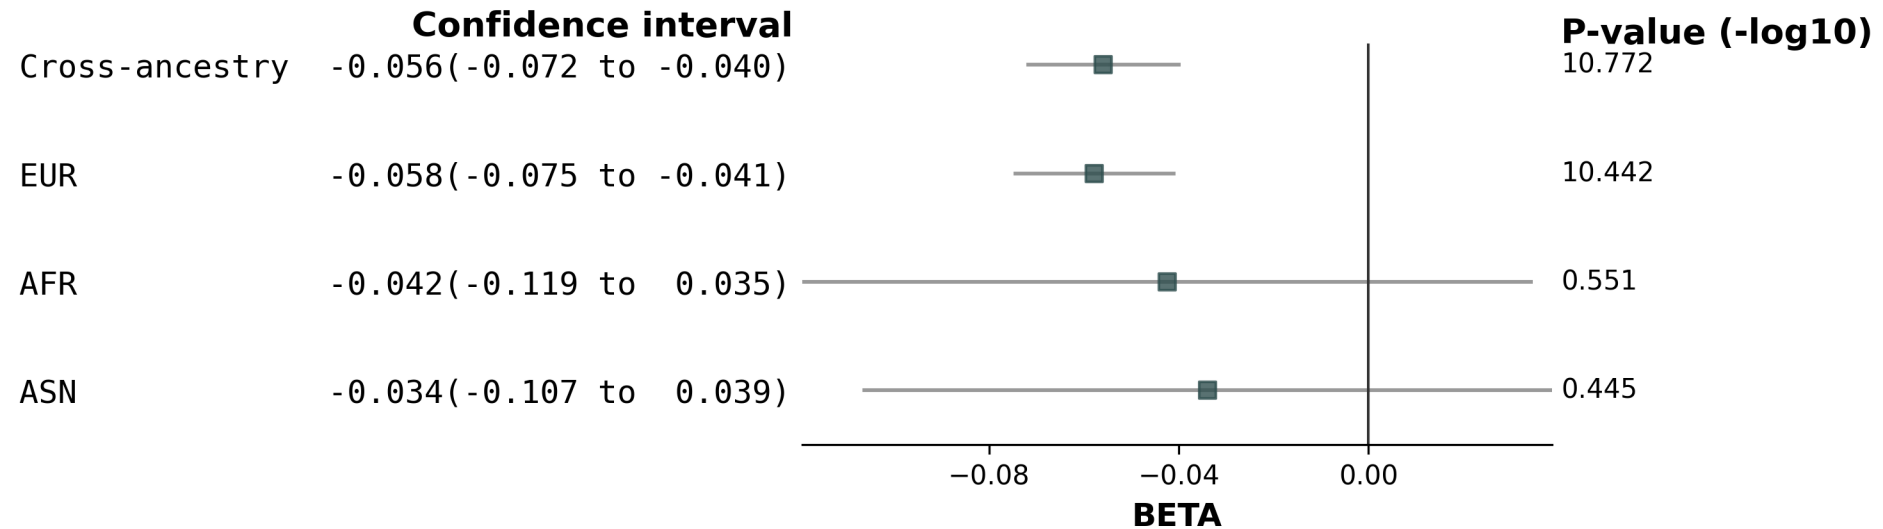

# moco\_GCC\_q8, rs3767216

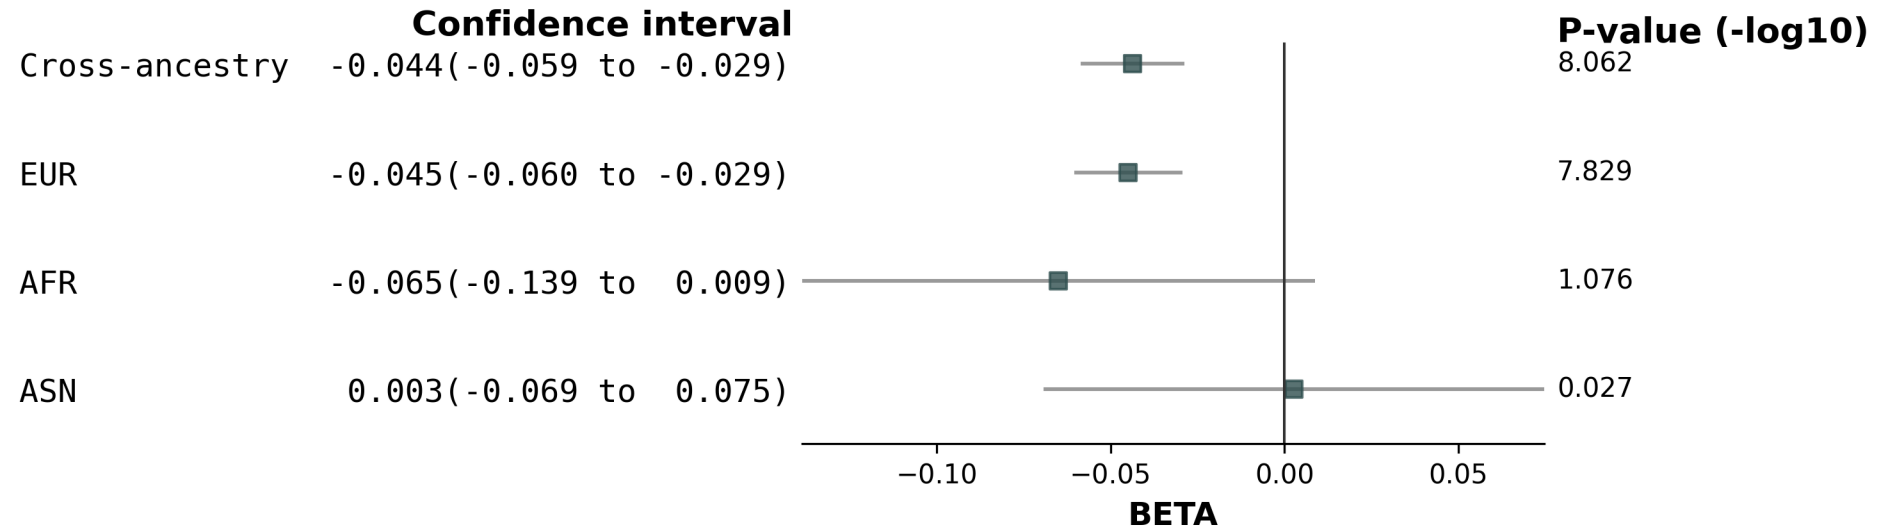

# moco\_GCC\_q8, rs11728835

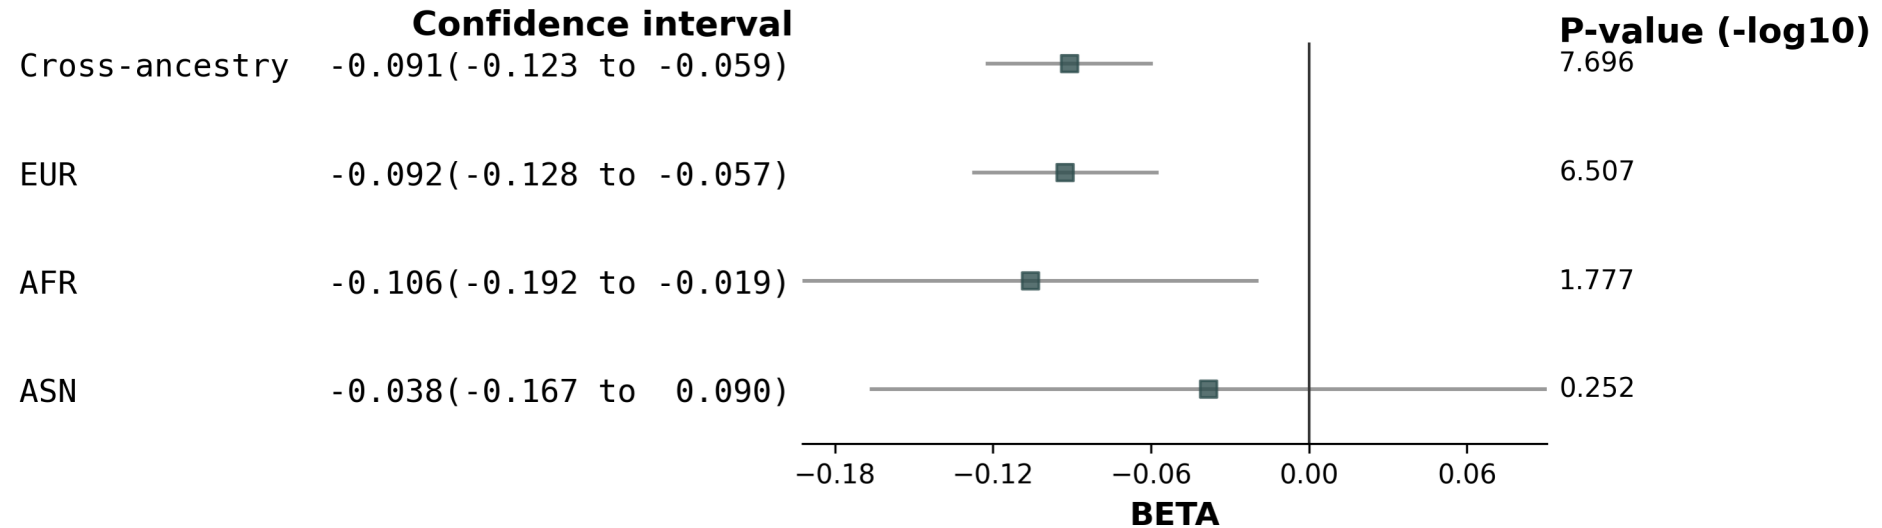

# moco\_RNFL\_q1, 8:109194601\_CA\_C

Confidence interval

P-value (-log10)

Cross-ancestry

-0.050 (-0.066 to -0.033)

8.323

EUR

-0.048 (-0.066 to -0.031)

7.328

AFR

-0.065 (-0.162 to 0.032)

0.719

ASN

-0.071 (-0.150 to 0.007)

1.12

-0.16 -0.12 -0.08 -0.04 0.00

BETA

# moco\_RNFL\_q1, 14:60902199\_GT\_G

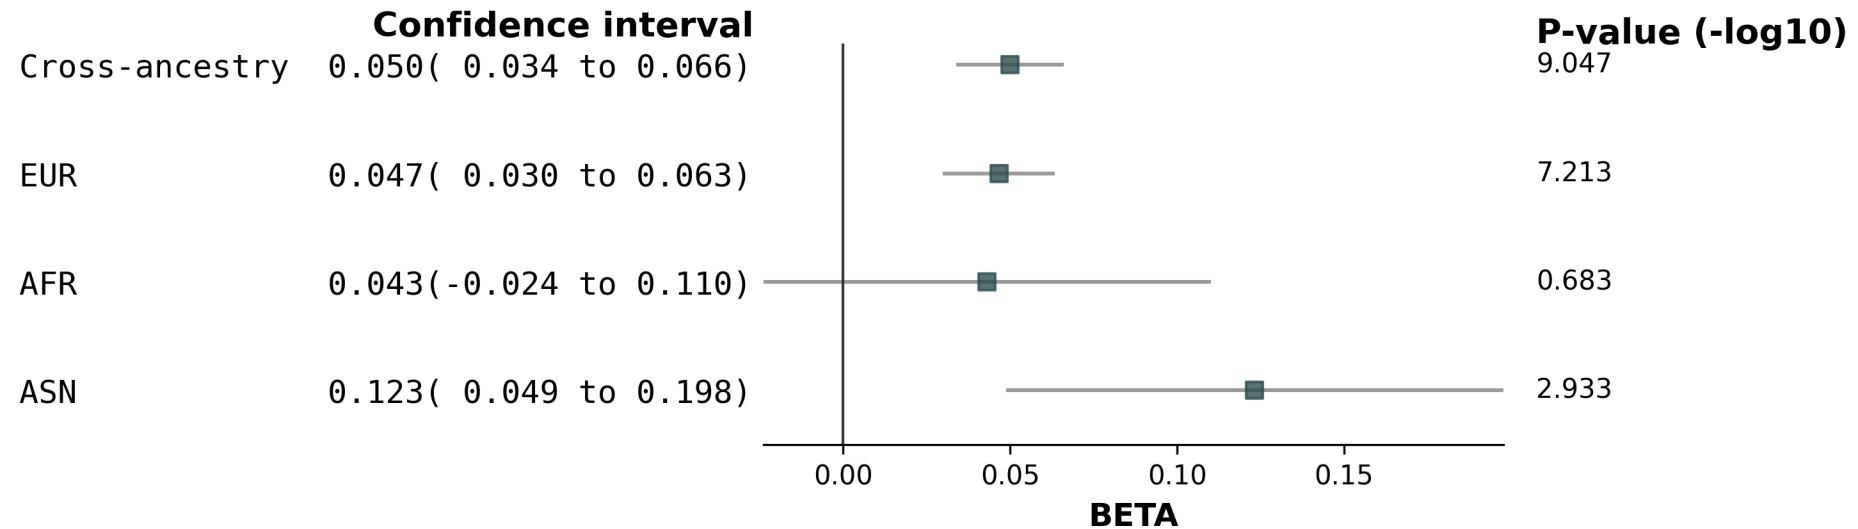

# moco\_RNFL\_q1, rs4635359

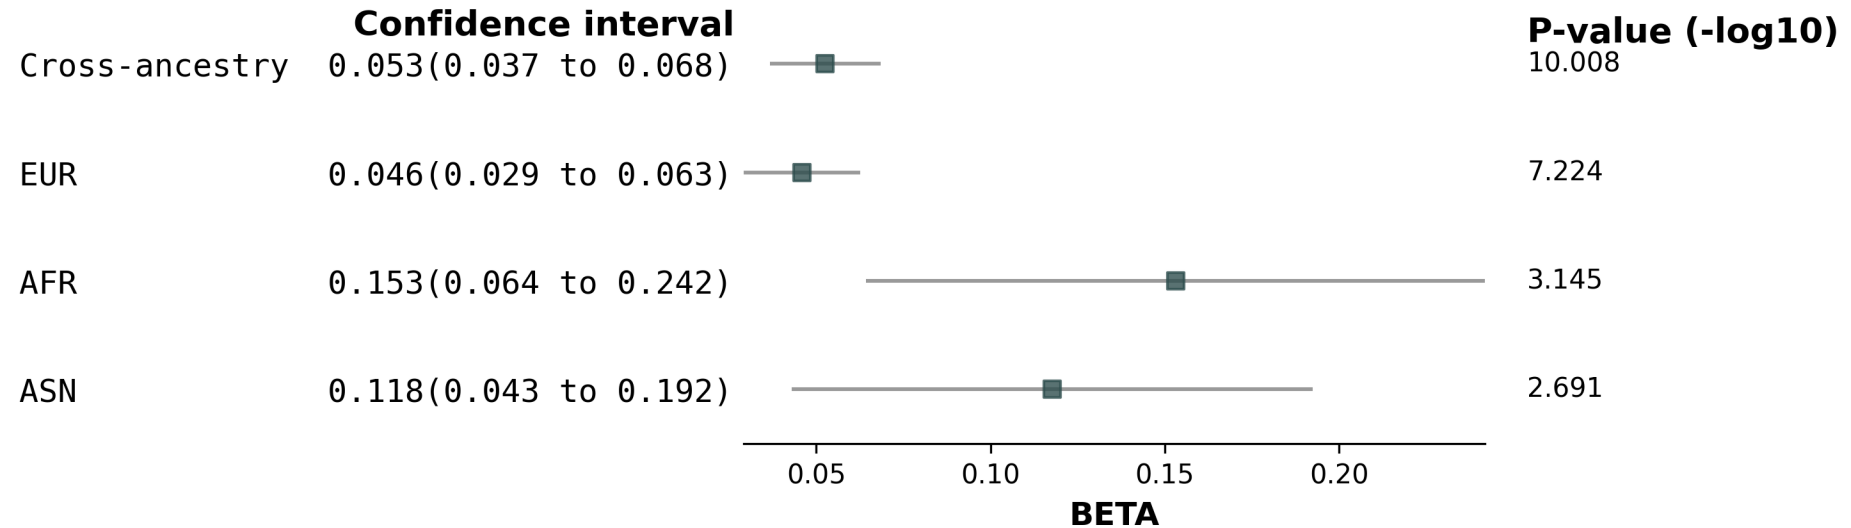



# moco\_RNFL\_q1, rs61854803

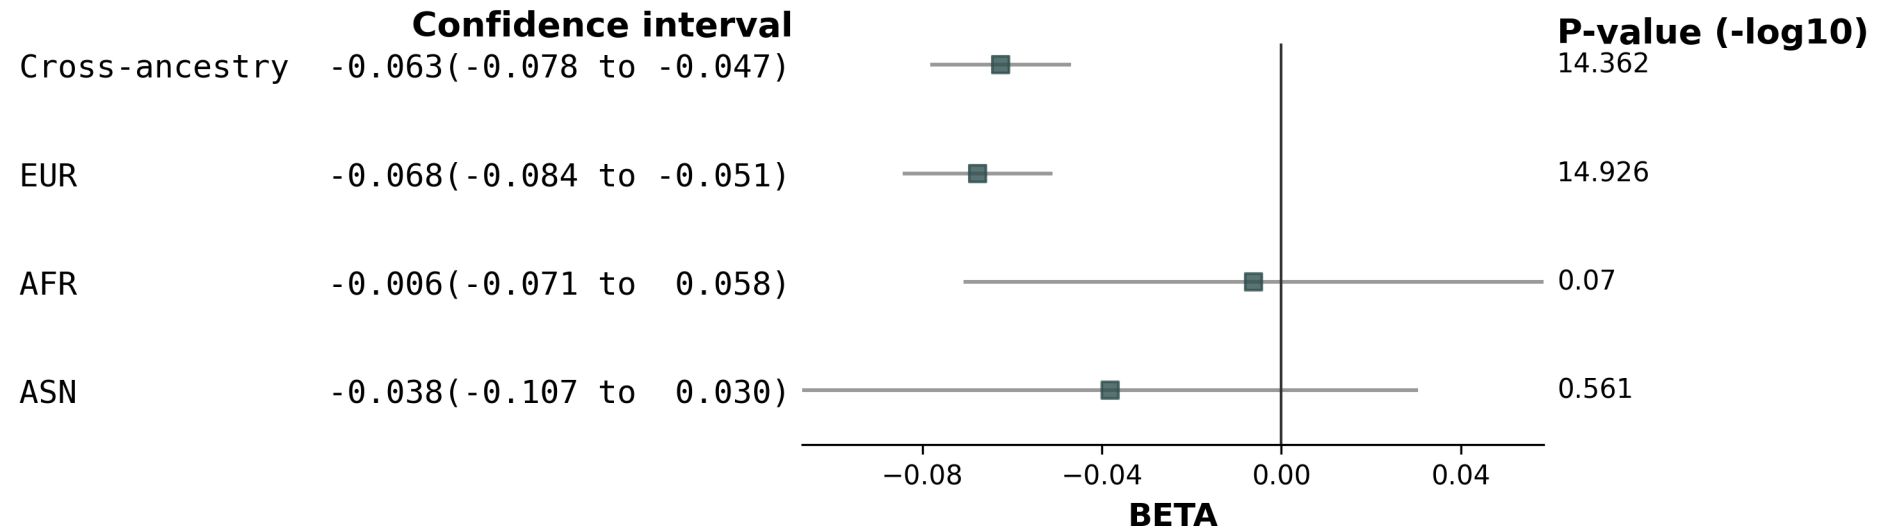

# moco\_RNFL\_q1, rs141927261

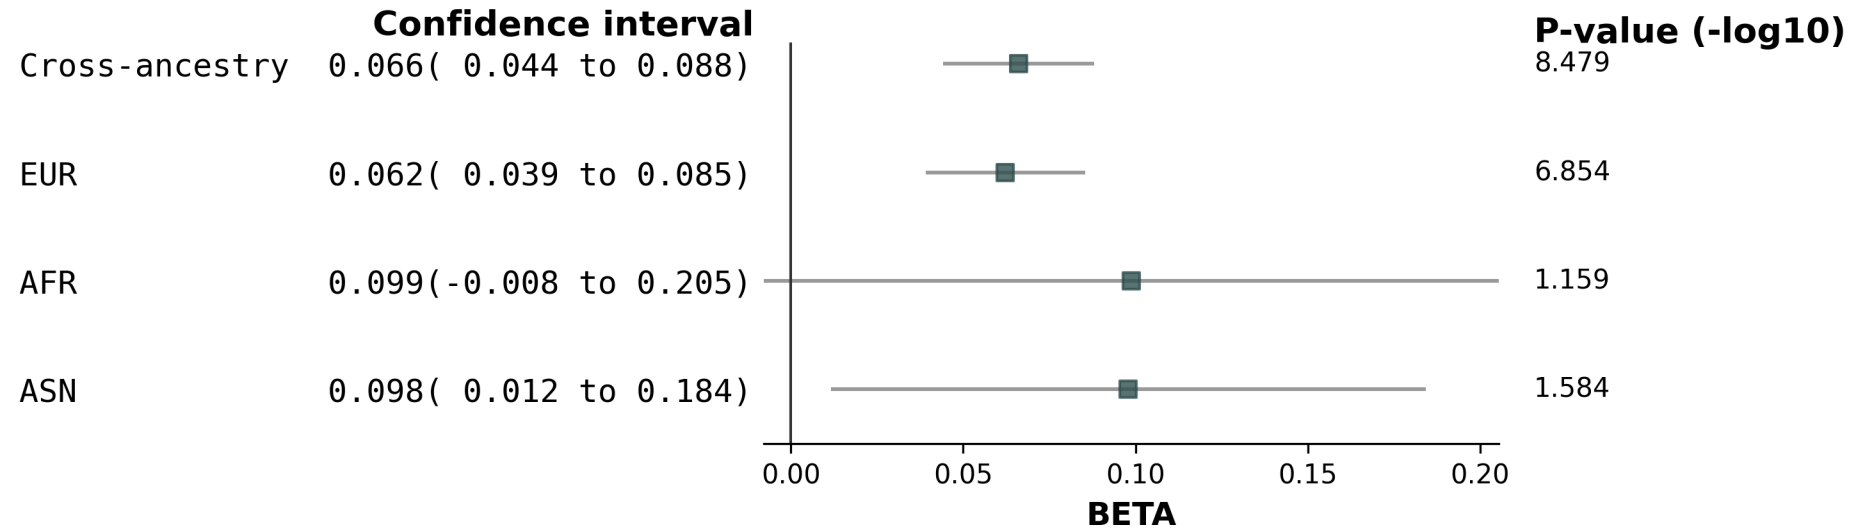

# moco\_RNFL\_q5, 10:69971810\_TAG\_T

Confidence interval

P-value (-log10)

Cross-ancestry -0.057 (-0.075 to -0.038)

8.686

EUR -0.055 (-0.074 to -0.036)

7.704

AFR -0.054 (-0.169 to 0.061)

0.442

ASN -0.087 (-0.172 to -0.003)

1.369

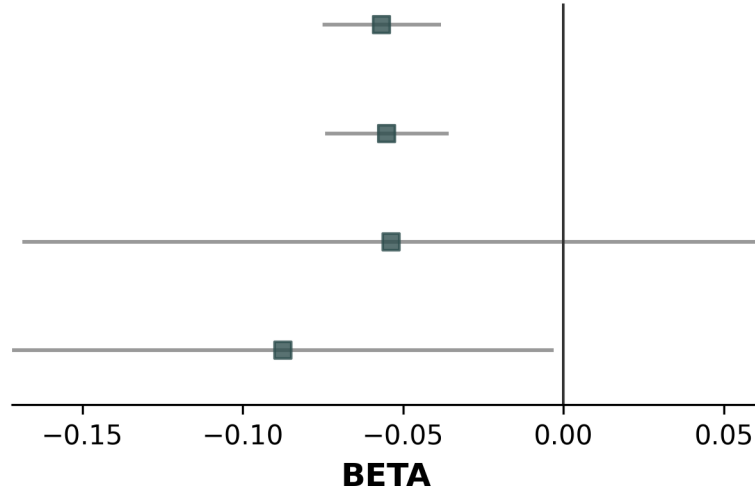

# moco\_RNFL\_q5, 14:60902199\_GT\_G

Confidence interval

P-value (-log10)

Cross-ancestry

-0.046 (-0.062 to -0.030)

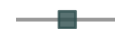

7.749

EUR

-0.042 (-0.059 to -0.024)

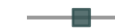

5.786

AFR

-0.035 (-0.100 to 0.029)

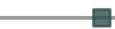

0.547

ASN

-0.136 (-0.207 to -0.065)

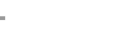

3.782

-0.20 -0.15 -0.10 -0.05 0.00

BETA

# moco\_RNFL\_q5, rs3790905

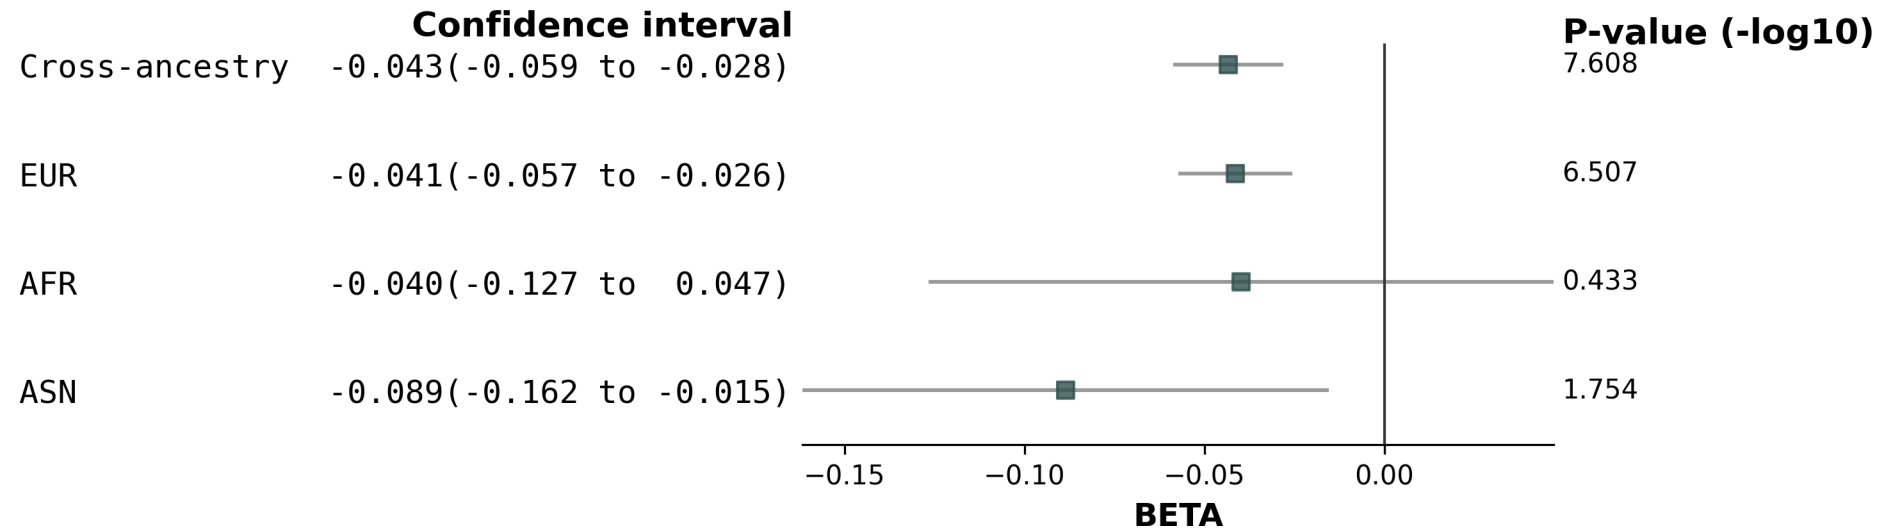

# moco\_RNFL\_q5, rs45569432

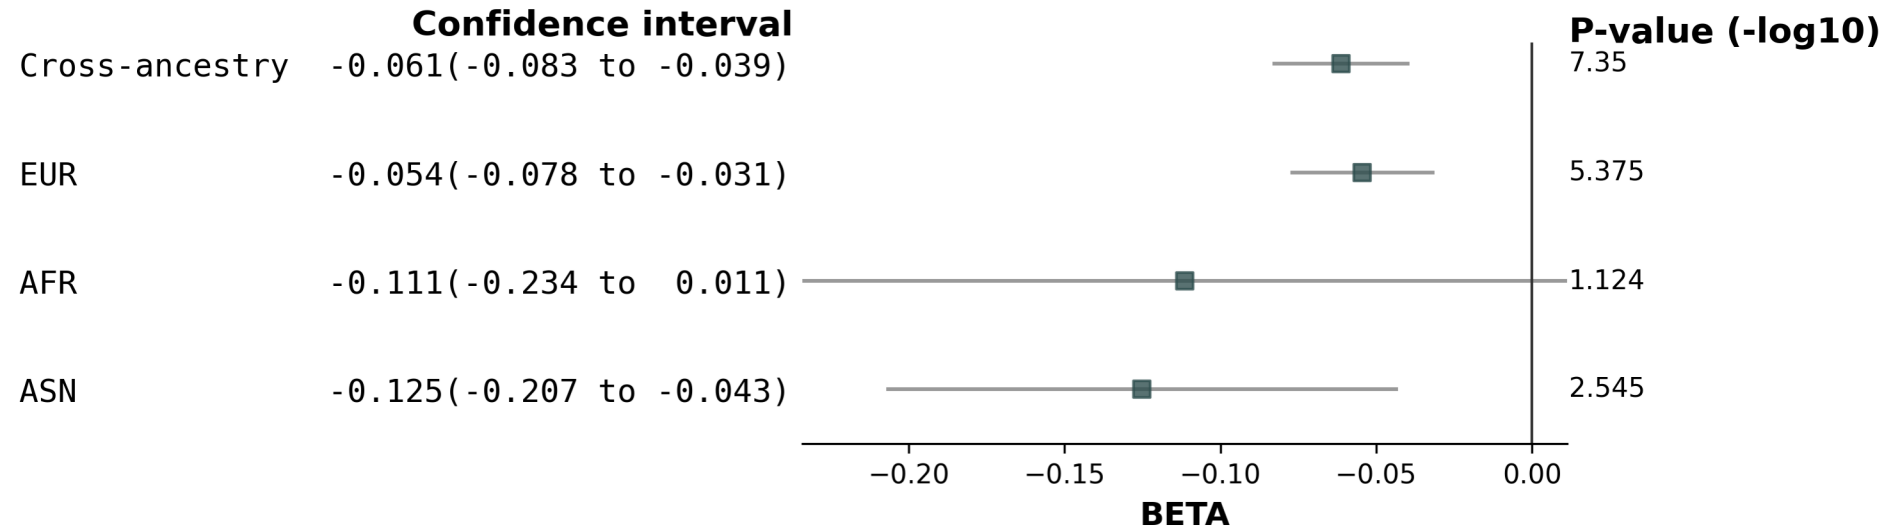

# moco\_RNFL\_q9, rs4635359

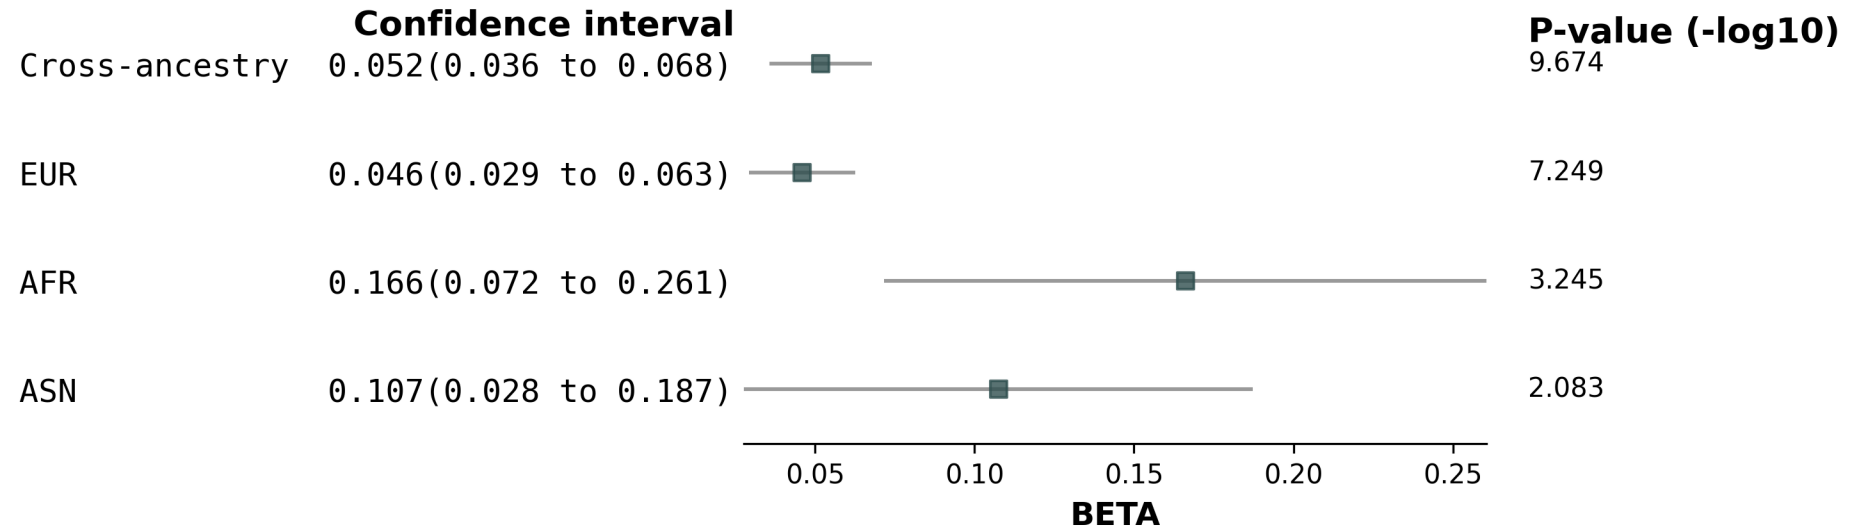

# moco\_RNFL\_q9, rs10823166

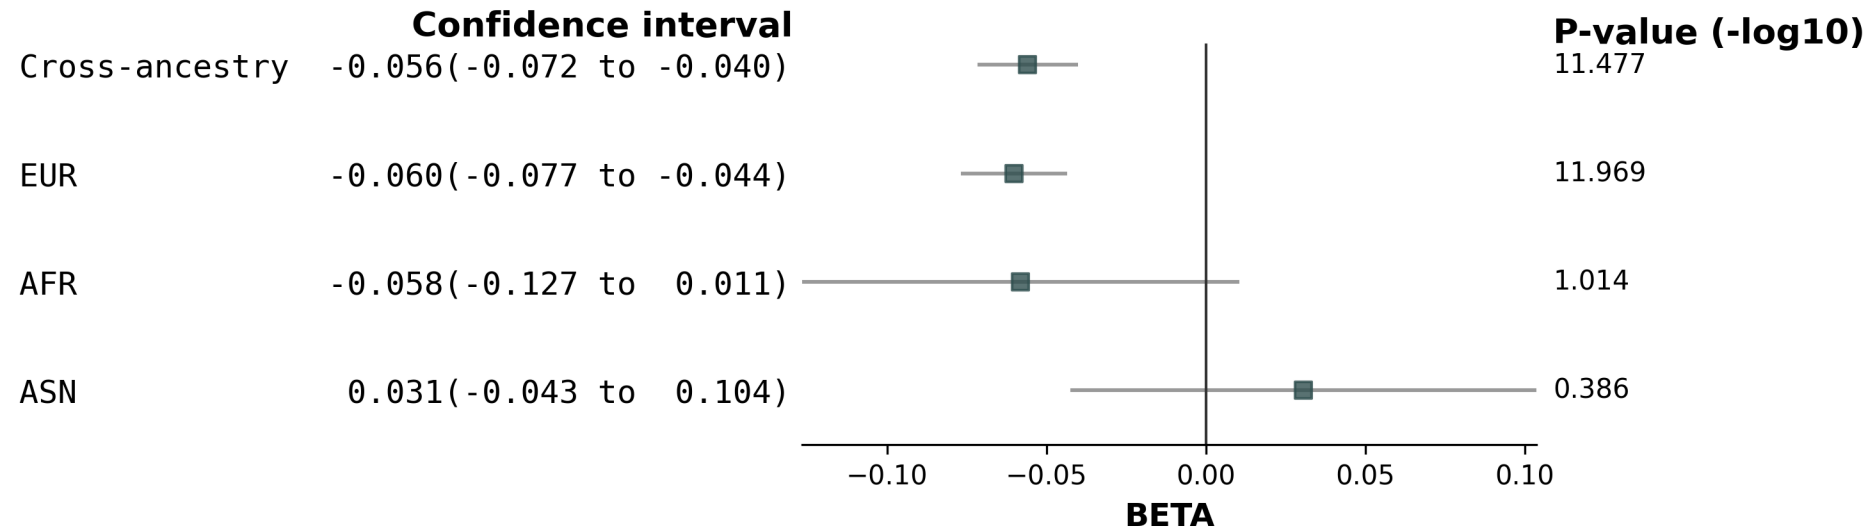

Supplement: Supplementary file 1 [file SI_File_3.pdf › Supplemental_Information/SI_Files/SI_File_3.pdf]
