# Supplementary material for: Deep-learning-derived glaucoma-related endophenotypes enable novel genome-wide genetic and functional discovery
Source: Research Square preprint supplement (doi:10.21203/rs.3.rs-8311177/v1), 2026-01-22
Supplement: Supplementary file 2 [file SI_File_1.xlsx]

## Sheet: Sheet1
trait	CHROM	POS	ID	REF	ALT	A1	TEST	OBS_CT	BETA	SE	T_STAT	P	A1.repl	TEST.repl	OBS_CT.repl	BETA.repl	SE.repl	T_STAT.repl	P.repl	Allele1	Allele2	Effect	StdErr	P-value	Direction	HetISq	HetChiSq	HetDf	HetPVal	CHROM_b38	POS_b38
autoGCC_q0	1	28452149	rs115029129	G	A	A	ADD	26547	0.151148	0.03211	4.70721	2.52395e-06	A	ADD	8826	-0.0821151	0.0560443	-1.46518	0.142907	a	g	0.0935	0.0279	0.0007909	+-	92.3	13.042	1	0.0003046	1	28125638
autoGCC_q0	2	38450110	rs112469545	C	T	T	ADD	26785	-0.276409	0.0619393	-4.46257	8.13114e-06	T	ADD	8888	0.122514	0.100357	1.22078	0.222203	t	c	-0.1664	0.0527	0.001598	-+	91.3	11.442	1	0.0007179	2	38222968
autoGCC_q0	2	45912640	rs563763	C	T	T	ADD	26129	-0.0515039	0.0110307	-4.66913	3.03987e-06	T	ADD	8691	-0.0135281	0.0187305	-0.722252	0.470159	t	c	-0.0417	0.0095	1.135e-05	--	67.2	3.052	1	0.08063	2	45685501
autoGCC_q0	3	193788222	rs10933710	C	G	G	ADD	26035	-0.0839143	0.016686	-5.02903	4.96252e-07	G	ADD	8672	-0.0182774	0.0290585	-0.628988	0.529373	c	g	0.0676	0.0145	2.949e-06	++	73.9	3.837	1	0.05013	3	194070433
autoGCC_q0	4	8377323	rs10025626	C	A	A	ADD	26828	0.0512503	0.0110032	4.65775	3.21224e-06	A	ADD	8911	0.0136832	0.0188052	0.727631	0.466858	a	c	0.0417	0.0095	1.146e-05	++	66.4	2.973	1	0.08467	4	8375596
autoGCC_q0	6	43926635	rs7745183	T	G	T	ADD	26066	0.0404049	0.00877941	4.60224	4.1994e-06	T	ADD	8677	-0.0128792	0.0150856	-0.853742	0.393272	t	g	-0.0269	0.0076	0.0003878	-+	89.3	9.319	1	0.002267	6	43958898
autoGCC_q0	6	79665210	rs7753358	T	A	A	ADD	25444	-0.0403096	0.0088108	-4.57502	4.78415e-06	A	ADD	8442	0.000965018	0.0149323	0.0646262	0.948473	a	t	-0.0297	0.0076	9.33e-05	-+	82.4	5.667	1	0.01728	6	78955493
autoGCC_q0	6	140006094	rs12215384	G	T	T	ADD	26828	-0.115271	0.0246248	-4.6811	2.86728e-06	T	ADD	8911	0.0254297	0.0421131	0.603842	0.545964	t	g	-0.0794	0.0213	0.0001868	-+	88	8.318	1	0.003925	6	139684957
autoGCC_q0	7	75214958	rs237231	A	C	C	ADD	26828	-0.0564535	0.012377	-4.56115	5.10985e-06	C	ADD	8911	0.0230745	0.020971	1.10031	0.271228	a	c	0.0359	0.0107	0.000755	+-	90.6	10.666	1	0.001091	7	75585640
autoGCC_q0	7	107893031	rs116865802	C	T	T	ADD	26591	0.140696	0.0278066	5.05982	4.22457e-07	T	ADD	8837	0.0354202	0.0481926	0.734972	0.462376	t	c	0.1144	0.0241	2.035e-06	++	72.1	3.58	1	0.05848	7	108252587
autoGCC_q0	8	30574185	rs2978297	T	G	T	ADD	26801	-0.599631	0.126133	-4.75396	2.00503e-06	T	ADD	8906	0.114191	0.238454	0.478879	0.632036	t	g	0.4436	0.1115	6.939e-05	+-	85.7	7.002	1	0.008141	8	30716668
autoGCC_q0	8	74219095	rs4374985	C	A	A	ADD	26736	-0.0481385	0.0103721	-4.64114	3.48131e-06	A	ADD	8872	-0.0406337	0.0175883	-2.31027	0.0208961	a	c	-0.0462	0.0089	2.324e-07	--	0	0.135	1	0.7132	8	73306860
autoGCC_q0	8	120655141	rs965301	A	G	G	ADD	26816	-0.0456585	0.0100135	-4.5597	5.14523e-06	G	ADD	8905	-0.00151388	0.0168078	-0.0900701	0.928234	a	g	0.0341	0.0086	7.392e-05	++	80.4	5.091	1	0.02405	8	119642901
autoGCC_q0	8	120873147	rs11409002	C	CT	CT	ADD	26442	-0.0589865	0.0131104	-4.4992	6.84999e-06	CT	ADD	8780	0.00805231	0.0225939	0.356393	0.721555	ct	c	-0.0421	0.0113	0.0002051	-+	84.8	6.586	1	0.01028	8	119860907
autoGCC_q0	9	2421135	rs117732687	G	C	C	ADD	26783	-0.188344	0.0356813	-5.27851	1.31251e-07	C	ADD	8896	0.0593465	0.0575567	1.0311	0.302524	c	g	-0.1196	0.0303	8.045e-05	-+	92.5	13.378	1	0.0002546	9	2421135
autoGCC_q0	9	18250834	rs72684965	C	T	T	ADD	26676	-0.164974	0.037185	-4.43658	9.17664e-06	T	ADD	8859	-0.0799648	0.0644454	-1.24081	0.214707	t	c	-0.1437	0.0322	8.086e-06	--	23.4	1.305	1	0.2532	9	18250836
autoGCC_q0	9	22500573	rs10965359	G	T	T	ADD	26233	0.131443	0.0290816	4.51981	6.21645e-06	T	ADD	8721	-0.0153176	0.0474468	-0.322839	0.746825	t	g	0.0914	0.0248	0.0002289	+-	85.6	6.955	1	0.008359	9	22500574
autoGCC_q0	9	126203660	rs1110320	C	A	C	ADD	26308	0.0443888	0.00881701	5.03445	4.82381e-07	C	ADD	8720	0.0171182	0.0152221	1.12456	0.260805	a	c	0.0375	0.0076	8.651e-07	++	58.4	2.403	1	0.1211	9	123441381
autoGCC_q0	9	126332230	rs1560264	C	T	T	ADD	26503	0.0958884	0.0179283	5.34843	8.94569e-08	T	ADD	8803	-0.0110276	0.0297605	-0.370545	0.710986	t	c	0.0674	0.0154	1.133e-05	+-	89.4	9.47	1	0.002089	9	123569951
autoGCC_q0	11	31696816	11:31696816_CT_C	CT	C	C	ADD	24690	0.0450655	0.00968371	4.65374	3.27656e-06	C	ADD	8275	0.0210999	0.0163312	1.292	0.196395	ct	c	-0.0388	0.0083	3.133e-06	--	37.2	1.593	1	0.2069	11	31675268
autoGCC_q0	11	88743517	rs11604416	C	G	G	ADD	24859	0.0469675	0.00912418	5.14758	2.65876e-07	G	ADD	8193	0.004586	0.0156866	0.292351	0.770026	c	g	-0.0363	0.0079	4.294e-06	--	81.7	5.454	1	0.01952	11	89010349
autoGCC_q0	12	6954864	rs5442	G	A	A	ADD	26828	0.0983481	0.0169832	5.79092	7.07834e-09	A	ADD	8911	-0.0448525	0.0294775	-1.52158	0.128149	a	g	0.0627	0.0147	2.062e-05	+-	94.4	17.718	1	2.561e-05	12	6845700
autoGCC_q0	12	117632232	rs778726043	CT	C	C	ADD	26191	-0.253849	0.0567442	-4.47357	7.72496e-06	C	ADD	8692	0.00353812	0.100687	0.0351396	0.971969	ct	c	0.1918	0.0494	0.0001044	+-	79.8	4.96	1	0.02595	12	117194427
autoGCC_q0	13	99104689	rs6956	T	C	C	ADD	26828	-0.0471403	0.0102715	-4.58944	4.46452e-06	C	ADD	8911	0.0139686	0.0175879	0.794214	0.427092	t	c	0.0316	0.0089	0.0003673	+-	88.9	9.002	1	0.002697	13	98452435
autoGCC_q0	13	101636722	rs17580898	A	T	T	ADD	26763	0.0625255	0.0136656	4.5754	4.77448e-06	T	ADD	8888	-0.0347108	0.0230215	-1.50776	0.131652	a	t	-0.0372	0.0118	0.001552	-+	92.4	13.192	1	0.0002812	13	100984370
autoGCC_q0	13	102572001	rs2493585	C	A	A	ADD	26543	0.0433498	0.00965115	4.49167	7.09659e-06	A	ADD	8816	0.000221378	0.0165585	0.0133695	0.989333	a	c	0.0324	0.0083	0.0001013	++	80.3	5.064	1	0.02443	13	101919651
autoGCC_q0	14	88651006	rs411627	T	C	C	ADD	26760	0.0426965	0.00923088	4.6254	3.75621e-06	C	ADD	8896	-0.0108641	0.0158782	-0.684213	0.493859	t	c	-0.0292	0.008	0.0002573	-+	88.2	8.504	1	0.003543	14	88184662
autoGCC_q0	17	33864441	rs75715226	A	T	T	ADD	26782	0.108687	0.0226536	4.79778	1.61295e-06	T	ADD	8891	-0.0106812	0.0374337	-0.285337	0.775392	a	t	-0.0767	0.0194	7.591e-05	-+	86.6	7.443	1	0.006369	17	35537422
autoGCC_q0	17	79529750	rs72855624	G	A	A	ADD	26593	-0.071029	0.0132796	-5.34872	8.93103e-08	A	ADD	8815	-0.0543345	0.0227131	-2.39221	0.0167681	a	g	-0.0668	0.0115	5.716e-09	--	0	0.403	1	0.5257	17	81562724
autoGCC_q0	17	79614932	17:79614932_TTAAC_T	TTAAC	T	TTAAC	ADD	26641	0.0741041	0.00894124	8.2879	1.20632e-16	TTAAC	ADD	8853	0.0725144	0.0153384	4.72764	2.30656e-06	t	ttaac	0.0737	0.0077	1.414e-21	++	0	0.008	1	0.9287	17	81647906
autoGCC_q0	20	14514841	rs17227083	C	T	T	ADD	26558	0.0449974	0.0096901	4.64364	3.43961e-06	T	ADD	8843	0.0200959	0.0163673	1.22781	0.219551	t	c	0.0385	0.0083	3.812e-06	++	41.7	1.714	1	0.1905	20	14534195
autoGCC_q0	20	44948556	rs117316704	C	T	T	ADD	26783	0.0854005	0.0186051	4.59016	4.44909e-06	T	ADD	8900	-0.00749842	0.0321149	-0.233487	0.815388	t	c	0.0621	0.0161	0.0001158	+-	84	6.265	1	0.01231	20	46319918
trait	CHROM	POS	ID	REF	ALT	A1	TEST	OBS_CT	BETA	SE	T_STAT	P	A1.repl	TEST.repl	OBS_CT.repl	BETA.repl	SE.repl	T_STAT.repl	P.repl	Allele1	Allele2	Effect	StdErr	P-value	Direction	HetISq	HetChiSq	HetDf	HetPVal	CHROM_b38	POS_b38
autoGCC_q10	1	22149183	rs1049644	G	C	C	ADD	26792	0.0443157	0.00961829	4.60744	4.09525e-06	C	ADD	8899	-0.016304	0.0165733	-0.983753	0.325264	c	g	0.029	0.0083	0.0004809	+-	90	10.008	1	0.001559	1	21822690
autoGCC_q10	1	35244799	rs2359643	A	G	G	ADD	26358	-0.0694886	0.0146023	-4.75875	1.95826e-06	G	ADD	8767	0.00821751	0.0253184	0.324567	0.745516	a	g	0.0501	0.0126	7.491e-05	+-	85.9	7.068	1	0.007845	1	34779198
autoGCC_q10	1	35309309	rs11263841	C	T	T	ADD	25864	-0.0791688	0.017647	-4.48624	7.28029e-06	T	ADD	8573	0.00280602	0.0300067	0.0935129	0.925498	t	c	-0.0581	0.0152	0.0001336	-+	82	5.545	1	0.01853	1	34843708
autoGCC_q10	1	82479318	rs17472472	T	C	C	ADD	26687	0.0397802	0.00882623	4.50704	6.60176e-06	C	ADD	8874	0.0525246	0.0153546	3.42076	0.000627275	t	c	-0.0429	0.0077	1.997e-08	--	0	0.518	1	0.4718	1	82013634
autoGCC_q10	1	110209906	rs638820	G	A	G	ADD	26828	-0.0410006	0.00843317	-4.86182	1.16967e-06	G	ADD	8911	0.00967408	0.0148194	0.652798	0.513903	a	g	-0.0286	0.0073	9.513e-05	-+	88.7	8.833	1	0.002959	1	109667284
autoGCC_q10	1	198474867	rs9970403	G	C	C	ADD	26828	-0.107668	0.0223828	-4.81031	1.51514e-06	C	ADD	8911	0.0488412	0.0380663	1.28306	0.199505	c	g	-0.0675	0.0193	0.0004718	-+	92	12.561	1	0.0003938	1	198505737
autoGCC_q10	1	223511844	rs61838237	C	T	T	ADD	26359	0.0419253	0.009262	4.52659	6.02054e-06	T	ADD	8763	0.0106848	0.016258	0.657206	0.511066	t	c	0.0343	0.008	2.059e-05	++	64.1	2.788	1	0.09499	1	223338502
autoGCC_q10	1	235707557	rs10925958	A	G	G	ADD	26632	-0.0652602	0.0139695	-4.67162	3.00291e-06	G	ADD	8836	-0.0370054	0.0245464	-1.50757	0.131702	a	g	0.0583	0.0121	1.541e-06	++	0.1	1.001	1	0.3171	1	235544257
autoGCC_q10	2	109572302	rs140054023	G	A	A	ADD	24935	-0.0850159	0.0182193	-4.66625	3.08347e-06	A	ADD	8318	0.0190586	0.0317572	0.600134	0.548433	a	g	-0.0592	0.0158	0.0001777	-+	87.6	8.08	1	0.004475	2	108955846
autoGCC_q10	2	222325331	rs919502	C	T	C	ADD	26350	-0.0438549	0.00987478	-4.4411	8.98622e-06	C	ADD	8763	-0.00929724	0.0172597	-0.538668	0.59013	t	c	-0.0353	0.0086	3.751e-05	--	66.9	3.02	1	0.08223	2	221460611
autoGCC_q10	3	123131254	rs17361324	C	T	T	ADD	26828	0.0491007	0.00952268	5.15619	2.53813e-07	T	ADD	8911	0.0210647	0.0168881	1.24732	0.212315	t	c	0.0423	0.0083	3.325e-07	++	52.2	2.091	1	0.1482	3	123412407
autoGCC_q10	3	185392506	rs200790171	G	GA	GA	ADD	26461	0.109535	0.0241708	4.53171	5.87647e-06	GA	ADD	8800	-0.0429087	0.0417386	-1.02803	0.303962	g	ga	-0.0713	0.0209	0.0006582	-+	90	9.99	1	0.001574	3	185674718
autoGCC_q10	3	196790936	rs12637016	A	G	G	ADD	26748	0.230428	0.0507763	4.5381	5.70091e-06	G	ADD	8877	-0.0384858	0.0815246	-0.472076	0.636884	a	g	-0.1553	0.0431	0.0003152	-+	87.2	7.839	1	0.005112	3	197064065
autoGCC_q10	4	72754071	rs550622840	C	CCA	CCA	ADD	20365	-0.0585675	0.0128401	-4.56128	5.11393e-06	CCA	ADD	6746	0.0443184	0.0230573	1.9221	0.0546355	cca	c	-0.0342	0.0112	0.002289	-+	93.4	15.198	1	9.681e-05	4	71888354
autoGCC_q10	4	76942677	rs35795399	T	C	C	ADD	26828	-0.133164	0.0287463	-4.63237	3.63209e-06	C	ADD	8911	-0.0699206	0.0497207	-1.40627	0.15968	t	c	0.1173	0.0249	2.426e-06	++	17.5	1.213	1	0.2708	4	76021524
autoGCC_q10	5	126961958	rs116237156	C	A	A	ADD	26828	-0.129232	0.0287366	-4.49712	6.91692e-06	A	ADD	8911	-0.0211309	0.051406	-0.411058	0.68104	a	c	-0.1035	0.0251	3.691e-05	--	70.3	3.369	1	0.06642	5	127626266
autoGCC_q10	6	14019159	rs78022810	C	T	T	ADD	26798	0.403056	0.088973	4.53009	5.92132e-06	T	ADD	8901	-0.177564	0.146974	-1.20814	0.227026	t	c	0.2473	0.0761	0.001155	+-	91.2	11.421	1	0.0007262	6	14018928
autoGCC_q10	6	18133586	6:18133586_CA_C	CA	C	C	ADD	26564	-0.146781	0.0328327	-4.47058	7.83305e-06	C	ADD	8833	0.077456	0.0574238	1.34885	0.17742	ca	c	0.0915	0.0285	0.001321	+-	91.3	11.492	1	0.000699	6	18133355
autoGCC_q10	6	46929291	rs76130033	T	G	G	ADD	26704	-0.119353	0.026519	-4.50067	6.80253e-06	G	ADD	8864	-0.0421627	0.044205	-0.9538	0.340211	t	g	0.0989	0.0227	1.361e-05	++	55.4	2.242	1	0.1343	6	46961554
autoGCC_q10	7	14412889	rs80000604	G	A	A	ADD	24661	-0.102941	0.0217016	-4.74346	2.11277e-06	A	ADD	8168	0.0165205	0.0375341	0.440147	0.659842	a	g	-0.073	0.0188	0.0001018	-+	86.8	7.592	1	0.005863	7	14373264
autoGCC_q10	7	127666989	rs755057400	ATAATT	A	A	ADD	26479	-0.0534287	0.011852	-4.508	6.5723e-06	A	ADD	8792	0.0179447	0.0210231	0.853571	0.393366	a	ataatt	-0.0362	0.0103	0.0004519	-+	88.6	8.746	1	0.003102	7	128026936
autoGCC_q10	8	142025286	rs55727870	G	A	A	ADD	26594	0.0470167	0.0105566	4.45377	8.47197e-06	A	ADD	8832	0.015132	0.0183131	0.826296	0.408659	a	g	0.0391	0.0091	1.944e-05	++	56	2.275	1	0.1314	8	141015187
autoGCC_q10	9	71913250	rs1416737	G	C	G	ADD	26598	-0.0480185	0.0104143	-4.61084	4.02917e-06	G	ADD	8843	-0.0120408	0.0181289	-0.664176	0.506595	c	g	-0.0391	0.009	1.498e-05	--	66.2	2.961	1	0.08528	9	69298334
autoGCC_q10	9	136193546	rs75114000	C	T	T	ADD	26669	0.0635786	0.0140259	4.53296	5.84169e-06	T	ADD	8849	-0.00869096	0.0243912	-0.356315	0.721613	t	c	0.0456	0.0122	0.0001755	+-	84.8	6.597	1	0.01021	9	133326709
autoGCC_q10	10	4576042	rs313479	T	C	T	ADD	26821	0.0592523	0.0124333	4.76561	1.89265e-06	T	ADD	8909	-0.000474	0.0215809	-0.0219639	0.982477	t	c	-0.0444	0.0108	3.816e-05	-+	82.6	5.751	1	0.01648	10	4533850
autoGCC_q10	11	5603385	rs72880058	C	A	A	ADD	26809	-0.077161	0.0170547	-4.52433	6.08463e-06	A	ADD	8904	0.00642114	0.0295813	0.217068	0.828161	a	c	-0.0563	0.0148	0.0001383	-+	83.3	5.992	1	0.01437	11	5582155
autoGCC_q10	11	89276166	rs12293379	T	C	C	ADD	25869	0.0581531	0.011831	4.91534	8.91728e-07	C	ADD	8584	-0.0138541	0.0211625	-0.654653	0.512708	t	c	-0.041	0.0103	7.16e-05	-+	88.7	8.821	1	0.002978	11	89542998
autoGCC_q10	12	75033361	rs12367337	A	G	G	ADD	25531	-0.10926	0.0236806	-4.61392	3.97059e-06	G	ADD	8477	0.0235652	0.0424166	0.555565	0.578523	a	g	0.0777	0.0207	0.0001714	+-	86.6	7.476	1	0.006253	12	74639581
autoGCC_q10	12	85009806	rs538677164	T	C	C	ADD	22680	-0.118168	0.025733	-4.59207	4.41221e-06	C	ADD	7561	-0.0110823	0.0425814	-0.260261	0.79467	t	c	0.0895	0.022	4.808e-05	++	78.4	4.633	1	0.03137	12	84616027
autoGCC_q10	13	30327699	rs117776476	A	G	G	ADD	26437	0.138997	0.0307426	4.5213	6.1727e-06	G	ADD	8776	-0.0118096	0.05563	-0.212288	0.831887	a	g	-0.1037	0.0269	0.0001159	-+	82.2	5.63	1	0.01766	13	29753562
autoGCC_q10	13	50437209	rs9526612	C	T	C	ADD	26756	-0.0392822	0.00846834	-4.63871	3.52254e-06	C	ADD	8887	0.000322284	0.0149591	0.0215443	0.982812	t	c	-0.0297	0.0074	5.67e-05	-+	81.2	5.308	1	0.02122	13	49863073
autoGCC_q10	13	77915091	rs9565336	C	G	G	ADD	26828	0.0959618	0.0203209	4.72232	2.34348e-06	G	ADD	8911	0.070231	0.0358572	1.95863	0.0501872	c	g	-0.0897	0.0177	3.893e-07	--	0	0.39	1	0.5324	13	77340956
autoGCC_q10	13	79803735	rs182102832	G	A	A	ADD	26436	-0.21237	0.0424909	-4.998	5.82977e-07	A	ADD	8764	0.114417	0.0778607	1.4695	0.141732	a	g	-0.1374	0.0373	0.0002303	-+	92.6	13.573	1	0.0002295	13	79229600
autoGCC_q10	14	59737100	rs35045925	G	A	A	ADD	26608	-0.0543357	0.0115702	-4.69619	2.66379e-06	A	ADD	8846	-0.0465701	0.0203379	-2.28982	0.0220554	a	g	-0.0524	0.0101	1.847e-07	--	0	0.11	1	0.74	14	59270382
autoGCC_q10	15	79438036	rs575258131	A	G	G	ADD	24387	0.183249	0.0396142	4.62584	3.75007e-06	G	ADD	8096	0.0797539	0.0711705	1.1206	0.26249	a	g	-0.1588	0.0346	4.499e-06	--	38.1	1.614	1	0.2039	15	79145694
autoGCC_q10	16	12154316	rs72784638	G	C	C	ADD	24957	-0.0736461	0.0146856	-5.01487	5.34335e-07	C	ADD	8292	0.0315757	0.0252378	1.25113	0.210923	c	g	-0.047	0.0127	0.0002112	-+	92.3	12.986	1	0.0003139	16	12060459
autoGCC_q10	16	80434518	16:80434518_ATTTAT_A	ATTTAT	A	A	ADD	26744	-0.1582	0.0353548	-4.47463	7.68598e-06	A	ADD	8880	-0.218092	0.0597498	-3.65009	0.000263655	a	atttat	-0.1737	0.0304	1.131e-08	--	0	0.744	1	0.3883	16	80400621
autoGCC_q10	17	27378001	rs3884011	G	A	A	ADD	26247	0.0524405	0.0111251	4.71372	2.44485e-06	A	ADD	8720	-0.012968	0.0195783	-0.662365	0.507755	a	g	0.0365	0.0097	0.0001626	+-	88.1	8.437	1	0.003676	17	29050983
autoGCC_q10	17	46724950	rs35453674	A	C	C	ADD	26813	0.137184	0.0297215	4.61564	3.93708e-06	C	ADD	8906	0.0504371	0.0513473	0.982274	0.325992	a	c	-0.1154	0.0257	7.231e-06	--	53.2	2.138	1	0.1437	17	48647588
autoGCC_q10	19	49566269	rs529956796	A	AT	AT	ADD	24760	0.0537968	0.0117343	4.58457	4.5715e-06	AT	ADD	8312	0.00703999	0.0207124	0.339893	0.733946	a	at	-0.0424	0.0102	3.232e-05	--	74.1	3.858	1	0.04952	19	49063012
autoGCC_q10	20	7229600	rs2236010	A	G	G	ADD	26828	-0.0497031	0.0101425	-4.90046	9.61692e-07	G	ADD	8911	0.0109039	0.0178391	0.611235	0.54106	a	g	0.0349	0.0088	7.559e-05	+-	88.5	8.723	1	0.003143	20	7248953
trait	CHROM	POS	ID	REF	ALT	A1	TEST	OBS_CT	BETA	SE	T_STAT	P	A1.repl	TEST.repl	OBS_CT.repl	BETA.repl	SE.repl	T_STAT.repl	P.repl	Allele1	Allele2	Effect	StdErr	P-value	Direction	HetISq	HetChiSq	HetDf	HetPVal	CHROM_b38	POS_b38
autoGCC_q2	1	72893387	rs116640468	G	T	T	ADD	26632	-0.132853	0.0274977	-4.83143	1.36307e-06	T	ADD	8855	-0.0314774	0.0454092	-0.693195	0.488206	t	g	-0.1057	0.0235	7.062e-06	--	72.6	3.647	1	0.05618	1	72427704
autoGCC_q2	1	82479318	rs17472472	T	C	C	ADD	26687	0.0481536	0.00893793	5.38756	7.20255e-08	C	ADD	8874	0.0410364	0.015455	2.65521	0.00794005	t	c	-0.0464	0.0077	2.059e-09	--	0	0.159	1	0.6902	1	82013634
autoGCC_q2	1	210547550	rs72745436	C	T	T	ADD	26635	-0.121344	0.0239433	-5.06799	4.04722e-07	T	ADD	8833	0.0103976	0.0434098	0.239522	0.810706	t	c	-0.0906	0.021	1.546e-05	-+	85.8	7.062	1	0.007874	1	210374206
autoGCC_q2	2	60189291	rs146357373	A	AT	AT	ADD	26133	0.0555669	0.0123402	4.50291	6.73181e-06	AT	ADD	8665	0.0019984	0.0213979	0.0933922	0.925594	a	at	-0.0422	0.0107	7.901e-05	--	78.7	4.703	1	0.03011	2	59962156
autoGCC_q2	2	222287427	rs74980450	G	A	A	ADD	25617	-0.090088	0.0191314	-4.70892	2.50342e-06	A	ADD	8533	-0.0080493	0.0338465	-0.237818	0.812028	a	g	-0.0702	0.0167	2.483e-05	--	77.5	4.452	1	0.03485	2	221422707
autoGCC_q2	2	229312182	rs114279694	C	T	T	ADD	26653	-0.137229	0.0296446	-4.62914	3.68912e-06	T	ADD	8866	0.00212043	0.0522801	0.040559	0.967648	t	c	-0.1033	0.0258	6.154e-05	-+	81.4	5.376	1	0.02042	2	228447466
autoGCC_q2	3	71182447	rs77877421	A	T	T	ADD	26465	0.0907346	0.0197137	4.60261	4.19169e-06	T	ADD	8775	0.0660337	0.0338792	1.94909	0.0513163	a	t	-0.0845	0.017	7.107e-07	--	0	0.397	1	0.5286	3	71133296
autoGCC_q2	4	182942870	rs113241497	C	CAATG	CAATG	ADD	25459	-0.0420806	0.00920728	-4.57037	4.89162e-06	CAATG	ADD	8513	-0.000191699	0.0160367	-0.0119538	0.990463	caatg	c	-0.0317	0.008	7.202e-05	--	80.5	5.131	1	0.0235	4	182021717
autoGCC_q2	5	110741753	rs116849276	T	A	A	ADD	26730	0.206354	0.046291	4.45775	8.31598e-06	A	ADD	8881	-0.0624842	0.0807897	-0.773418	0.439295	a	t	0.1399	0.0402	0.0004952	+-	88	8.336	1	0.003886	5	111406055
autoGCC_q2	6	4549080	rs73359372	T	C	C	ADD	25622	0.0656241	0.014814	4.42988	9.46764e-06	C	ADD	8519	-0.0927892	0.0251309	-3.69224	0.000223681	t	c	-0.0248	0.0128	0.05223	-+	96.6	29.488	1	5.626e-08	6	4548846
autoGCC_q2	6	116173372	rs147157756	A	T	T	ADD	26737	0.113004	0.025391	4.45055	8.59974e-06	T	ADD	8876	0.0235155	0.0457386	0.514129	0.607174	a	t	-0.0919	0.0222	3.462e-05	--	65.8	2.926	1	0.08715	6	115852208
autoGCC_q2	7	128708632	rs151106734	A	G	G	ADD	26723	-0.206396	0.0385645	-5.35196	8.77237e-08	G	ADD	8872	0.0682367	0.070406	0.969189	0.332477	a	g	0.143	0.0338	2.354e-05	+-	91.5	11.704	1	0.0006237	7	129068578
autoGCC_q2	7	149324119	rs354070	C	T	C	ADD	26754	0.0400257	0.00902015	4.43736	9.1432e-06	C	ADD	8893	0.0224183	0.0155613	1.44065	0.14972	t	c	0.0356	0.0078	5.079e-06	++	0	0.958	1	0.3276	7	149627028
autoGCC_q2	9	71913250	rs1416737	G	C	G	ADD	26598	-0.0478622	0.0105397	-4.54115	5.61934e-06	G	ADD	8843	0.000628825	0.0182421	0.0344711	0.972502	c	g	-0.0357	0.0091	9.049e-05	-+	81.1	5.298	1	0.02136	9	69298334
autoGCC_q2	9	136205000	rs4962132	A	G	G	ADD	26657	0.0632097	0.0140405	4.50197	6.76113e-06	G	ADD	8839	-0.008342	0.0243097	-0.343155	0.73149	a	g	-0.0453	0.0122	0.0001939	-+	84.6	6.496	1	0.01081	9	133338163
autoGCC_q2	10	54568677	rs11003176	A	G	G	ADD	26267	0.0469928	0.0101674	4.62191	3.82024e-06	G	ADD	8729	-0.000834541	0.0175757	-0.0474828	0.96213	a	g	-0.035	0.0088	6.981e-05	-+	82	5.548	1	0.0185	10	52808917
autoGCC_q2	10	62291122	rs10994406	T	C	C	ADD	26828	-0.10168	0.0215764	-4.71257	2.45843e-06	C	ADD	8911	-0.0358184	0.0360577	-0.993363	0.32056	t	c	0.0843	0.0185	5.265e-06	++	59.3	2.457	1	0.117	10	60531364
autoGCC_q2	10	70041583	rs4745956	C	T	C	ADD	26723	-0.0505488	0.0100978	-5.00593	5.5947e-07	C	ADD	8876	-0.0308499	0.0177009	-1.74284	0.0813966	t	c	-0.0457	0.0088	1.871e-07	--	0	0.934	1	0.3337	10	68281826
autoGCC_q2	10	78233914	rs111637417	C	T	T	ADD	26304	0.128399	0.0290625	4.41804	9.99991e-06	T	ADD	8749	0.104603	0.0500903	2.08828	0.0368012	t	c	0.1224	0.0251	1.119e-06	++	0	0.169	1	0.6811	10	76474156
autoGCC_q2	10	114243465	rs76846052	A	G	G	ADD	26728	-0.0675042	0.0149728	-4.50846	6.5577e-06	G	ADD	8881	0.0305448	0.0256045	1.19294	0.232924	a	g	0.0425	0.0129	0.001003	+-	90.8	10.927	1	0.0009476	10	112483706
autoGCC_q2	10	115715046	rs151547	G	A	A	ADD	26678	-0.0444568	0.00990328	-4.48909	7.18259e-06	A	ADD	8869	-0.00181272	0.0175343	-0.103382	0.917662	a	g	-0.0341	0.0086	7.508e-05	--	77.7	4.484	1	0.03421	10	113955287
autoGCC_q2	11	89163854	rs146192685	T	C	C	ADD	24035	0.0489958	0.00989001	4.95407	7.31711e-07	C	ADD	7986	0.00280135	0.0173142	0.161795	0.871472	t	c	-0.0376	0.0086	1.176e-05	--	81.4	5.367	1	0.02052	11	89430686
autoGCC_q2	13	79804838	rs117614736	T	A	A	ADD	26792	-0.250436	0.0474206	-5.28116	1.2937e-07	A	ADD	8900	0.0160998	0.0849938	0.189423	0.849766	a	t	-0.1872	0.0414	6.195e-06	-+	86.7	7.5	1	0.006171	13	79230703
autoGCC_q2	13	112875925	rs375310916	T	TG	TG	ADD	23757	-0.0666496	0.0148089	-4.50066	6.80659e-06	TG	ADD	7930	-0.0127365	0.0259403	-0.490992	0.623446	t	tg	0.0534	0.0129	3.296e-05	++	69.3	3.258	1	0.07108	13	112221611
autoGCC_q2	14	59737100	rs35045925	G	A	A	ADD	26608	-0.0653412	0.011725	-5.57281	2.53087e-08	A	ADD	8846	-0.0343208	0.0204744	-1.67627	0.0937201	a	g	-0.0577	0.0102	1.436e-08	--	42.1	1.729	1	0.1886	14	59270382
autoGCC_q2	14	60976537	rs33912345	C	A	C	ADD	26828	-0.0451486	0.00884761	-5.10292	3.36736e-07	C	ADD	8911	-0.0441275	0.0153346	-2.87764	0.00401616	a	c	-0.0449	0.0077	4.682e-09	--	0	0.003	1	0.954	14	60509819
autoGCC_q2	16	12154316	rs72784638	G	C	C	ADD	24957	-0.0683895	0.0148624	-4.60153	4.21469e-06	C	ADD	8292	0.0231161	0.0254695	0.907601	0.364116	c	g	-0.0451	0.0128	0.0004366	-+	89.6	9.629	1	0.001915	16	12060459
autoGCC_q2	17	27378001	rs3884011	G	A	A	ADD	26247	0.0510221	0.0112696	4.52741	5.99724e-06	A	ADD	8720	-0.0134606	0.0197303	-0.682229	0.495113	a	g	0.0352	0.0098	0.000327	+-	87.6	8.054	1	0.004541	17	29050983
autoGCC_q2	17	47466640	rs8072520	T	G	G	ADD	26712	-0.0747407	0.0168259	-4.44199	8.94885e-06	G	ADD	8868	-0.0523356	0.0294868	-1.77489	0.0759512	t	g	0.0692	0.0146	2.161e-06	++	0	0.436	1	0.5093	17	49389278
autoGCC_q2	19	23254894	rs151317844	G	A	A	ADD	25799	-0.173744	0.0346732	-5.01092	5.45294e-07	A	ADD	8569	0.0264955	0.0623119	0.425209	0.670695	a	g	-0.1264	0.0303	3.021e-05	-+	87.3	7.885	1	0.004984	19	23072092
autoGCC_q2	19	49566269	rs529956796	A	AT	AT	ADD	24760	0.0565772	0.0119111	4.74995	2.04611e-06	AT	ADD	8312	0.0237884	0.020855	1.14066	0.254045	a	at	-0.0485	0.0103	2.728e-06	--	46.3	1.864	1	0.1722	19	49063012
autoGCC_q2	19	54516973	rs457146	C	T	C	ADD	26727	-0.0407355	0.00919646	-4.42947	9.48387e-06	C	ADD	8877	-0.0144419	0.0158233	-0.912695	0.361428	t	c	-0.0341	0.008	1.801e-05	--	51.6	2.064	1	0.1508	19	54013719
autoGCC_q2	21	24833303	rs12483326	G	A	A	ADD	26217	-0.0470469	0.0103895	-4.52829	5.97239e-06	A	ADD	8715	0.0148255	0.0180764	0.820154	0.412151	a	g	-0.0317	0.009	0.0004359	-+	88.6	8.807	1	0.003001	21	23460984
autoGCC_q2	21	38430143	rs79598413	C	T	T	ADD	26731	0.120655	0.0265733	4.54048	5.63709e-06	T	ADD	8882	0.0940947	0.04729	1.98974	0.0466505	t	c	0.1143	0.0232	8.095e-07	++	0	0.24	1	0.6244	21	37057843
autoGCC_q2	21	43105136	rs11908726	A	G	A	ADD	26828	0.043618	0.0093064	4.68688	2.78761e-06	A	ADD	8911	0.00728584	0.0161323	0.451631	0.651546	a	g	-0.0345	0.0081	1.824e-05	--	73.7	3.806	1	0.05108	21	41684976
trait	CHROM	POS	ID	REF	ALT	A1	TEST	OBS_CT	BETA	SE	T_STAT	P	A1.repl	TEST.repl	OBS_CT.repl	BETA.repl	SE.repl	T_STAT.repl	P.repl	Allele1	Allele2	Effect	StdErr	P-value	Direction	HetISq	HetChiSq	HetDf	HetPVal	CHROM_b38	POS_b38
autoGCC_q3	1	28452149	rs115029129	G	A	A	ADD	26547	0.158965	0.032487	4.89318	9.98017e-07	A	ADD	8826	0.00318328	0.0566113	0.0562304	0.95516	a	g	0.1204	0.0282	1.937e-05	++	82.4	5.696	1	0.017	1	28125638
autoGCC_q3	1	233808641	rs67050838	C	T	T	ADD	26453	-0.0430442	0.00954448	-4.50986	6.51493e-06	T	ADD	8793	0.0187454	0.0161801	1.15854	0.246674	t	c	-0.0271	0.0082	0.0009816	-+	90.8	10.819	1	0.001005	1	233672895
autoGCC_q3	2	45912640	rs563763	C	T	T	ADD	26129	-0.0537992	0.0111596	-4.82091	1.43711e-06	T	ADD	8691	-0.00770329	0.0188996	-0.40759	0.683585	t	c	-0.0419	0.0096	1.31e-05	--	77.3	4.411	1	0.03571	2	45685501
autoGCC_q3	2	113984503	rs2241975	C	T	T	ADD	26758	-0.0717018	0.0160544	-4.46618	7.99541e-06	T	ADD	8883	-0.0296756	0.0269904	-1.09949	0.271585	t	c	-0.0607	0.0138	1.08e-05	--	44.2	1.791	1	0.1808	2	113226926
autoGCC_q3	2	212611552	rs751370160	CA	C	C	ADD	20971	0.0452932	0.00976214	4.63967	3.5107e-06	C	ADD	6918	0.0090457	0.0168009	0.538406	0.590314	ca	c	-0.0361	0.0084	1.851e-05	--	71.3	3.48	1	0.06212	2	211746827
autoGCC_q3	3	25861719	rs13347268	T	A	A	ADD	26787	-0.198852	0.0428363	-4.64214	3.46446e-06	A	ADD	8893	0.0309839	0.0726824	0.426292	0.669906	a	t	-0.1396	0.0369	0.0001551	-+	86.5	7.422	1	0.006445	3	25820228
autoGCC_q3	3	34317923	3:34317923_GA_G	GA	G	G	ADD	24466	-0.0439586	0.00907918	-4.84169	1.29527e-06	G	ADD	8162	0.00900231	0.0154195	0.583827	0.559353	g	ga	-0.0303	0.0078	0.0001062	-+	88.6	8.76	1	0.003079	3	34276431
autoGCC_q3	3	136195788	rs1394094	A	T	A	ADD	26648	-0.0406299	0.00901429	-4.50727	6.59457e-06	A	ADD	8844	0.0199238	0.0155201	1.28374	0.199266	a	t	0.0254	0.0078	0.001143	+-	91.2	11.383	1	0.0007413	3	136476946
autoGCC_q3	3	171416601	3:171416601_CA_C	CA	C	C	ADD	21544	0.0485956	0.0108585	4.47535	7.66755e-06	C	ADD	7155	0.0277672	0.0182276	1.52336	0.127714	ca	c	-0.0431	0.0093	3.756e-06	--	0	0.964	1	0.3263	3	171698811
autoGCC_q3	3	193788222	rs10933710	C	G	G	ADD	26035	-0.0978115	0.016891	-5.79076	7.08758e-09	G	ADD	8672	-0.0150296	0.0293943	-0.511309	0.609148	c	g	0.0773	0.0146	1.323e-07	++	83.2	5.962	1	0.01461	3	194070433
autoGCC_q3	4	140049599	rs147935857	C	T	T	ADD	26570	-0.188413	0.0424702	-4.43636	9.18585e-06	T	ADD	8802	0.0666612	0.0743745	0.896291	0.370122	t	c	-0.1257	0.0369	0.0006543	-+	88.7	8.87	1	0.002899	4	139128445
autoGCC_q3	6	79665210	rs7753358	T	A	A	ADD	25444	-0.0445271	0.00892097	-4.99129	6.03747e-07	A	ADD	8442	-0.00782033	0.0150877	-0.518324	0.604246	a	t	-0.035	0.0077	5.109e-06	--	77.2	4.386	1	0.03624	6	78955493
autoGCC_q3	6	109013664	rs2207731	A	G	G	ADD	25422	0.0436366	0.00944076	4.62215	3.81653e-06	G	ADD	8449	0.00720998	0.0159263	0.452708	0.650771	a	g	-0.0342	0.0081	2.589e-05	--	74.2	3.871	1	0.04913	6	108692461
autoGCC_q3	6	142037142	6:142037142_TC_T	TC	T	T	ADD	26302	0.109716	0.0186283	5.88974	3.91518e-09	T	ADD	8749	0.00776172	0.0326538	0.237697	0.812122	t	tc	0.0847	0.0162	1.662e-07	++	86.4	7.355	1	0.006688	6	141716005
autoGCC_q3	7	19483091	rs113087430	T	C	C	ADD	26556	-0.120186	0.0245252	-4.90052	9.61473e-07	C	ADD	8815	0.0538845	0.0409514	1.31581	0.18827	t	c	0.0742	0.021	0.0004185	+-	92.5	13.298	1	0.0002656	7	19443468
autoGCC_q3	7	107893031	rs116865802	C	T	T	ADD	26591	0.127075	0.028139	4.51597	6.32977e-06	T	ADD	8837	0.0183302	0.0486895	0.376471	0.706576	t	c	0.0998	0.0244	4.161e-05	++	73.3	3.739	1	0.05315	7	108252587
autoGCC_q3	8	16939868	rs12545137	A	T	T	ADD	26800	0.0806693	0.0171458	4.70491	2.55244e-06	T	ADD	8904	-0.0129792	0.0297471	-0.43632	0.662615	a	t	-0.0573	0.0149	0.0001141	-+	86.6	7.439	1	0.006381	8	17082359
autoGCC_q3	9	14782125	rs5896648	T	TCTAGGC	TCTAGGC	ADD	26562	-0.0746827	0.0165727	-4.50637	6.62271e-06	TCTAGGC	ADD	8820	-0.0375398	0.0278556	-1.34766	0.177803	t	tctaggc	0.065	0.0142	5.071e-06	++	23.8	1.313	1	0.2518	9	14782127
autoGCC_q3	9	27679922	rs4436203	G	A	A	ADD	26776	0.0536984	0.0121303	4.42679	9.60255e-06	A	ADD	8893	0.0224509	0.0208049	1.07912	0.280566	a	g	0.0458	0.0105	1.255e-05	++	40.6	1.683	1	0.1945	9	27679924
autoGCC_q3	9	88898988	rs35904142	G	GA	GA	ADD	26385	-0.0431004	0.00972862	-4.43027	9.44941e-06	GA	ADD	8768	-0.00892543	0.0166476	-0.53614	0.591876	g	ga	0.0344	0.0084	4.212e-05	++	68.2	3.141	1	0.07633	9	86284073
autoGCC_q3	9	126332230	rs1560264	C	T	T	ADD	26503	0.0862623	0.0181497	4.75281	2.0166e-06	T	ADD	8803	0.00113449	0.0300527	0.0377501	0.969888	t	c	0.0635	0.0155	4.352e-05	++	83	5.879	1	0.01532	9	123569951
autoGCC_q3	10	19720907	rs7894518	A	G	G	ADD	26692	-0.0421594	0.0090629	-4.65186	3.30529e-06	G	ADD	8861	0.00791627	0.0153874	0.514465	0.60694	a	g	0.0293	0.0078	0.0001788	+-	87.3	7.863	1	0.005046	10	19431978
autoGCC_q3	11	66536139	11:66536139_GT_G	GT	G	G	ADD	20459	0.106213	0.0227268	4.67345	2.98066e-06	G	ADD	6669	0.0495862	0.0398783	1.24344	0.21375	g	gt	0.0923	0.0197	2.925e-06	++	34.3	1.522	1	0.2173	11	66768668
autoGCC_q3	11	88743517	rs11604416	C	G	G	ADD	24859	0.0449242	0.00925115	4.85606	1.20471e-06	G	ADD	8193	0.010306	0.0158695	0.649422	0.516084	c	g	-0.0361	0.008	6.116e-06	--	71.8	3.552	1	0.05949	11	89010349
autoGCC_q3	12	6954864	rs5442	G	A	A	ADD	26828	0.0945581	0.0171887	5.50117	3.80714e-08	A	ADD	8911	-0.00802636	0.0297729	-0.269586	0.787485	a	g	0.0689	0.0149	3.667e-06	+-	88.8	8.904	1	0.002845	12	6845700
autoGCC_q3	13	51755914	13:51755914_ATAAC_A	ATAAC	A	A	ADD	26393	-0.101135	0.0221838	-4.55896	5.16383e-06	A	ADD	8773	-0.0054684	0.0377407	-0.144894	0.884798	a	ataac	-0.0766	0.0191	6.236e-05	--	79.1	4.775	1	0.02887	13	51181778
autoGCC_q3	13	61261294	rs6562123	T	G	T	ADD	26084	-0.0402604	0.0089812	-4.48274	7.4006e-06	T	ADD	8648	0.0310785	0.0153489	2.0248	0.0429188	t	g	0.0221	0.0078	0.004421	+-	93.8	16.092	1	6.033e-05	13	60687160
autoGCC_q3	13	99131051	rs764681204	CTCTGGCAACACTGGCTGA	C	C	ADD	26486	-0.0494424	0.010912	-4.53101	5.89591e-06	C	ADD	8793	-0.0144535	0.018752	-0.770769	0.440864	ctctggcaacactggctga	c	0.0406	0.0094	1.678e-05	++	61.6	2.601	1	0.1068	13	98478797
autoGCC_q3	15	28230318	rs1800407	C	T	T	ADD	26828	0.0872961	0.0156665	5.57216	2.54019e-08	T	ADD	8911	0.067234	0.0268386	2.50513	0.0122585	t	c	0.0822	0.0135	1.239e-09	++	0	0.417	1	0.5186	15	27985172
autoGCC_q3	15	95804209	rs200367149	A	ATT	ATT	ADD	26640	-0.22756	0.0469093	-4.85105	1.23502e-06	ATT	ADD	8845	0.0209903	0.0773941	0.271213	0.786234	a	att	0.1608	0.0401	6.125e-05	+-	86.7	7.543	1	0.006025	15	95260980
autoGCC_q3	17	68212550	rs8076345	G	A	A	ADD	26828	-0.0508914	0.0113744	-4.4742	7.70127e-06	A	ADD	8911	-0.0109206	0.0196528	-0.555679	0.578444	a	g	-0.0409	0.0098	3.314e-05	--	67.7	3.099	1	0.07836	17	70216409
autoGCC_q3	17	79529750	rs72855624	G	A	A	ADD	26593	-0.0796861	0.0134328	-5.93222	3.02556e-09	A	ADD	8815	-0.0734529	0.0229293	-3.20345	0.00136274	a	g	-0.0781	0.0116	1.608e-11	--	0	0.055	1	0.8146	17	81562724
autoGCC_q3	17	79614932	17:79614932_TTAAC_T	TTAAC	T	TTAAC	ADD	26641	0.07496	0.00904797	8.28473	1.2388e-16	TTAAC	ADD	8853	0.0749376	0.0154862	4.83899	1.32711e-06	t	ttaac	0.075	0.0078	8.44e-22	++	0	0	1	0.999	17	81647906
autoGCC_q3	18	2303633	18:2303633_GGAGGATCCCTT_G	GGAGGATCCCTT	G	G	ADD	24166	0.0523062	0.0108664	4.81357	1.49151e-06	G	ADD	8050	-0.0199303	0.0184949	-1.07761	0.281241	g	ggaggatccctt	0.0338	0.0094	0.0003129	+-	91.2	11.34	1	0.0007584	18	2303634
trait	CHROM	POS	ID	REF	ALT	A1	TEST	OBS_CT	BETA	SE	T_STAT	P	A1.repl	TEST.repl	OBS_CT.repl	BETA.repl	SE.repl	T_STAT.repl	P.repl	Allele1	Allele2	Effect	StdErr	P-value	Direction	HetISq	HetChiSq	HetDf	HetPVal	CHROM_b38	POS_b38
autoGCC_q4	1	36588100	rs274128	T	C	T	ADD	26417	-0.0612654	0.0137447	-4.45738	8.3307e-06	T	ADD	8798	0.0211513	0.0234642	0.90143	0.367385	t	c	0.0402	0.0119	0.0006977	+-	89.1	9.185	1	0.002439	1	36122499
autoGCC_q4	1	156501594	1:156501594_AC_A	AC	A	A	ADD	26658	0.10406	0.0234045	4.44613	8.77834e-06	A	ADD	8846	0.0210568	0.0408752	0.515148	0.606462	a	ac	0.0836	0.0203	3.882e-05	++	67.8	3.105	1	0.07803	1	156531802
autoGCC_q4	1	240574210	rs953247	C	T	T	ADD	26508	-0.051593	0.0109262	-4.72194	2.34805e-06	T	ADD	8805	-0.0166101	0.0190877	-0.870202	0.384214	t	c	-0.043	0.0095	5.888e-06	--	60.5	2.53	1	0.1117	1	240410910
autoGCC_q4	2	1745278	rs13019541	T	C	T	ADD	26828	-0.0408252	0.00869217	-4.69678	2.65597e-06	T	ADD	8911	0.00375628	0.0151853	0.247363	0.804633	t	c	0.0298	0.0075	7.707e-05	+-	84.6	6.492	1	0.01084	2	1741506
autoGCC_q4	3	1144330	rs190404246	G	T	T	ADD	26044	-0.179255	0.0395978	-4.52688	6.01255e-06	T	ADD	8646	0.0705069	0.0675039	1.04449	0.29629	t	g	-0.1153	0.0342	0.000735	-+	90.2	10.185	1	0.001416	3	1102646
autoGCC_q4	3	39764786	rs7613794	C	T	T	ADD	26772	0.308258	0.0622574	4.95135	7.41488e-07	T	ADD	8894	0.0533845	0.101389	0.526534	0.598531	t	c	0.2385	0.0531	6.96e-06	++	78.2	4.589	1	0.03218	3	39723295
autoGCC_q4	3	45814094	rs17279437	G	A	A	ADD	26828	-0.0610015	0.0137689	-4.43039	9.4437e-06	A	ADD	8911	-0.073571	0.0237751	-3.09445	0.00197787	a	g	-0.0642	0.0119	7.258e-08	--	0	0.209	1	0.6473	3	45772602
autoGCC_q4	3	73964353	rs6784682	A	C	C	ADD	25611	0.0406481	0.00907095	4.48113	7.45691e-06	C	ADD	8496	-0.012531	0.0159133	-0.787456	0.431037	a	c	-0.0276	0.0079	0.0004599	-+	88.1	8.429	1	0.003693	3	73915202
autoGCC_q4	3	193788222	rs10933710	C	G	G	ADD	26035	0.0759496	0.0165753	4.5821	4.62462e-06	G	ADD	8672	0.0525177	0.0295668	1.77624	0.0757281	c	g	-0.0703	0.0145	1.142e-06	--	0	0.478	1	0.4894	3	194070433
autoGCC_q4	4	72621803	4:72621803_AAATG_A	AAATG	A	A	ADD	26593	-0.0776014	0.0169283	-4.58413	4.57956e-06	A	ADD	8843	0.0570913	0.0293101	1.94784	0.0514663	a	aaatg	-0.0439	0.0147	0.002741	-+	93.7	15.836	1	6.909e-05	4	71756086
autoGCC_q4	4	106841962	rs6856422	G	T	T	ADD	24984	-0.0459178	0.00885155	-5.18754	2.14757e-07	T	ADD	8256	-0.00970684	0.0155212	-0.625392	0.531731	t	g	-0.037	0.0077	1.464e-06	--	75.7	4.107	1	0.0427	4	105920805
autoGCC_q4	4	176949288	rs11936126	T	A	A	ADD	25487	-0.0408798	0.00905386	-4.51518	6.35466e-06	A	ADD	8448	0.00485528	0.0159266	0.304853	0.760485	a	t	-0.0297	0.0079	0.0001603	-+	84	6.232	1	0.01254	4	176028137
autoGCC_q4	5	169703320	5:169703320_ACC_A	ACC	A	A	ADD	26719	-0.361501	0.0809879	-4.46364	8.0909e-06	A	ADD	8882	-0.00191388	0.157126	-0.0121806	0.990282	a	acc	-0.286	0.072	7.092e-05	--	75.8	4.138	1	0.04193	5	170276316
autoGCC_q4	6	32519013	rs28417075	A	T	T	ADD	24933	0.0805742	0.01744	4.62007	3.85525e-06	T	ADD	8298	0.0119796	0.0299662	0.39977	0.689336	a	t	-0.0632	0.0151	2.739e-05	--	74.5	3.914	1	0.04788	6	32551236
autoGCC_q4	6	43925373	rs4382251	T	C	T	ADD	26129	-0.0401328	0.00873652	-4.59368	4.37523e-06	T	ADD	8690	0.0142845	0.015318	0.932527	0.35109	t	c	0.0268	0.0076	0.0004182	+-	89.5	9.523	1	0.002029	6	43957636
autoGCC_q4	6	142037142	6:142037142_TC_T	TC	T	T	ADD	26302	-0.0898395	0.0183028	-4.90852	9.23151e-07	T	ADD	8749	-0.0304713	0.0327899	-0.929289	0.352765	t	tc	-0.0757	0.016	2.148e-06	--	60	2.499	1	0.1139	6	141716005
autoGCC_q4	7	46634506	rs2881198	G	C	G	ADD	26471	-0.0404642	0.00860969	-4.69984	2.61672e-06	G	ADD	8793	-0.0231019	0.0150645	-1.53354	0.12518	c	g	-0.0362	0.0075	1.289e-06	--	0.1	1.001	1	0.317	7	46594908
autoGCC_q4	8	16969765	rs75014326	A	G	G	ADD	26604	-0.0832679	0.0166919	-4.98851	6.12304e-07	G	ADD	8832	0.0108397	0.0299338	0.362123	0.717269	a	g	0.0609	0.0146	2.908e-05	+-	86.7	7.539	1	0.006036	8	17112256
autoGCC_q4	9	7053274	rs818866	C	T	T	ADD	26204	0.0980464	0.0218748	4.48217	7.42013e-06	T	ADD	8706	-0.0114178	0.0385177	-0.29643	0.766909	t	c	0.0714	0.019	0.0001761	+-	83.6	6.107	1	0.01347	9	7053274
autoGCC_q4	9	77386938	rs2027026	T	C	T	ADD	26424	-0.0399663	0.00855395	-4.67226	2.99365e-06	T	ADD	8758	0.00846022	0.0150978	0.560361	0.575248	t	c	0.0282	0.0074	0.0001513	+-	87.2	7.788	1	0.005259	9	74772022
autoGCC_q4	9	112078855	rs10979822	A	G	G	ADD	26344	0.0767607	0.0168868	4.5456	5.50227e-06	G	ADD	8749	0.0135817	0.0292837	0.463799	0.642804	a	g	-0.061	0.0146	3.053e-05	--	71.4	3.493	1	0.06162	9	109316575
autoGCC_q4	10	19720907	rs7894518	A	G	G	ADD	26692	0.0403026	0.00890427	4.52621	6.0311e-06	G	ADD	8861	0.0123358	0.0155167	0.795	0.426635	a	g	-0.0334	0.0077	1.55e-05	--	59.1	2.444	1	0.118	10	19431978
autoGCC_q4	10	70040111	rs10762201	A	G	A	ADD	26725	-0.0554147	0.0100061	-5.53812	3.08613e-08	A	ADD	8876	-0.0448711	0.017573	-2.55341	0.0106841	a	g	0.0528	0.0087	1.232e-09	++	0	0.272	1	0.6021	10	68280354
autoGCC_q4	12	28803167	12:28803167_TATATATA_T	TATATATA	T	TATATATA	ADD	26065	0.0402036	0.00898378	4.47513	7.66894e-06	TATATATA	ADD	8655	-0.00585144	0.015747	-0.37159	0.710207	t	tatatata	0.0289	0.0078	0.0002131	+-	84.5	6.453	1	0.01107	12	28650234
autoGCC_q4	12	28906964	rs71452102	G	A	A	ADD	26520	-0.11799	0.0253633	-4.65199	3.30341e-06	A	ADD	8803	0.0288886	0.043531	0.663633	0.506943	a	g	-0.0808	0.0219	0.0002283	-+	88.2	8.499	1	0.003553	12	28754031
autoGCC_q4	12	47164312	rs74386906	T	A	A	ADD	26415	0.12718	0.0279526	4.54984	5.3925e-06	A	ADD	8751	-0.119883	0.0477528	-2.5105	0.0120738	a	t	0.0641	0.0241	0.007852	+-	95	19.937	1	8.004e-06	12	46770529
autoGCC_q4	13	47285687	rs842386	G	A	G	ADD	26585	-0.109137	0.0226139	-4.82609	1.40016e-06	G	ADD	8835	-0.042137	0.038626	-1.0909	0.275349	a	g	-0.092	0.0195	2.405e-06	--	55.4	2.241	1	0.1344	13	46711552
autoGCC_q4	15	28230318	rs1800407	C	T	T	ADD	26828	-0.0750493	0.0153975	-4.87413	1.09911e-06	T	ADD	8911	-0.0729484	0.0270121	-2.70058	0.00693493	t	c	-0.0745	0.0134	2.52e-08	--	0	0.005	1	0.9461	15	27985172
autoGCC_q4	16	5878666	rs7201787	G	C	G	ADD	26338	0.0422194	0.00944838	4.46843	7.91252e-06	G	ADD	8752	-0.00897408	0.0164181	-0.546597	0.58467	c	g	0.0295	0.0082	0.0003179	+-	86.3	7.304	1	0.006881	16	5828665
autoGCC_q4	16	8716128	rs72766456	A	G	G	ADD	26648	0.0620155	0.013437	4.61528	3.94402e-06	G	ADD	8847	0.0500346	0.0239624	2.08804	0.0368225	a	g	-0.0591	0.0117	4.492e-07	--	0	0.19	1	0.6628	16	8622271
autoGCC_q4	16	11912687	rs112445081	G	T	T	ADD	24879	-0.0724981	0.0140143	-5.17316	2.31949e-07	T	ADD	8260	-0.0196342	0.0247438	-0.793502	0.427508	t	g	-0.0597	0.0122	9.963e-07	--	71.1	3.456	1	0.06303	16	11818830
autoGCC_q4	16	15759119	rs146667585	A	T	T	ADD	26658	-0.10723	0.0228103	-4.70096	2.60241e-06	T	ADD	8853	0.0039653	0.0388742	0.102003	0.918756	a	t	0.0788	0.0197	6.258e-05	+-	83.6	6.086	1	0.01362	16	15665262
autoGCC_q4	16	75817290	rs9923411	G	A	A	ADD	26198	-0.0385384	0.00861621	-4.47277	7.7536e-06	A	ADD	8714	-0.00456508	0.0150579	-0.303168	0.761769	a	g	-0.0302	0.0075	5.513e-05	--	73.9	3.835	1	0.0502	16	75783392
autoGCC_q4	16	84210444	rs62049867	G	A	A	ADD	26721	0.205883	0.044333	4.64402	3.43317e-06	A	ADD	8879	0.0295908	0.074463	0.397389	0.69109	a	g	0.1597	0.0381	2.745e-05	++	75.8	4.138	1	0.04192	16	84176838
autoGCC_q4	17	79611271	rs62075722	A	G	A	ADD	26769	-0.0507367	0.00890702	-5.69626	1.23748e-08	A	ADD	8887	-0.0519334	0.0155796	-3.33343	0.00086133	a	g	0.051	0.0077	4.123e-11	++	0	0.004	1	0.9468	17	81644245
autoGCC_q4	18	10657605	rs547303	C	A	A	ADD	26631	-0.103182	0.0211474	-4.87917	1.0715e-06	A	ADD	8846	0.0413962	0.0375897	1.10127	0.270811	a	c	-0.0684	0.0184	0.0002053	-+	91.1	11.237	1	0.0008019	18	10657608
autoGCC_q4	19	39634806	19:39634806_TTAGATAGA_T	TTAGATAGA	T	TTAGATAGA	ADD	26768	-0.142768	0.0322149	-4.43174	9.38487e-06	TTAGATAGA	ADD	8884	-0.108479	0.0533697	-2.03259	0.0421241	t	ttagataga	-0.1336	0.0276	1.269e-06	--	0	0.303	1	0.5823	19	39144166
trait	CHROM	POS	ID	REF	ALT	A1	TEST	OBS_CT	BETA	SE	T_STAT	P	A1.repl	TEST.repl	OBS_CT.repl	BETA.repl	SE.repl	T_STAT.repl	P.repl	Allele1	Allele2	Effect	StdErr	P-value	Direction	HetISq	HetChiSq	HetDf	HetPVal	CHROM_b38	POS_b38
autoGCC_q6	1	18588557	rs399440	A	G	G	ADD	26538	0.0548233	0.0112996	4.8518	1.23038e-06	G	ADD	8788	-0.0280534	0.0198216	-1.41529	0.157019	a	g	-0.0345	0.0098	0.0004413	-+	92.4	13.194	1	0.0002808	1	18262063
autoGCC_q6	1	45001157	rs12063874	T	A	A	ADD	26710	0.154218	0.0341403	4.5172	6.29312e-06	A	ADD	8870	-0.104401	0.0555071	-1.88085	0.0600252	a	t	0.0832	0.0291	0.004206	+-	93.7	15.75	1	7.229e-05	1	44535485
autoGCC_q6	1	56717454	rs11379869	T	TG	TG	ADD	26745	-0.0469288	0.00978668	-4.79517	1.63412e-06	TG	ADD	8867	0.0117404	0.0169969	0.69074	0.489747	t	tg	0.0323	0.0085	0.0001385	+-	88.8	8.948	1	0.002778	1	56251782
autoGCC_q6	1	82491626	rs80028999	T	A	A	ADD	26665	0.0702187	0.0154485	4.54535	5.5084e-06	A	ADD	8870	-0.0148957	0.0269174	-0.553386	0.580013	a	t	0.0491	0.0134	0.0002456	+-	86.7	7.521	1	0.006098	1	82025942
autoGCC_q6	1	223635886	rs71644742	A	G	G	ADD	26708	-0.0523046	0.0117904	-4.43619	9.19325e-06	G	ADD	8868	0.0215279	0.0202475	1.06324	0.287702	a	g	0.0336	0.0102	0.0009718	+-	89.9	9.93	1	0.001626	1	223462544
autoGCC_q6	1	248692459	rs557543704	G	T	T	ADD	25030	-0.0738203	0.0149883	-4.92519	8.48151e-07	T	ADD	8291	-0.0273585	0.0260072	-1.05196	0.292851	t	g	-0.0622	0.013	1.647e-06	--	58.3	2.396	1	0.1217	1	248529158
autoGCC_q6	2	112996893	rs149461957	T	G	G	ADD	26669	0.192473	0.0425402	4.5245	6.07989e-06	G	ADD	8857	0.200374	0.075348	2.65931	0.00784419	t	g	-0.1944	0.037	1.543e-07	--	0	0.008	1	0.9272	2	112239316
autoGCC_q6	2	145315140	2:145315140_GGTGT_G	GGTGT	G	G	ADD	23655	-0.0495555	0.00930558	-5.32535	1.01679e-07	G	ADD	7910	-0.032514	0.016008	-2.03111	0.0422773	g	ggtgt	-0.0453	0.008	1.858e-08	--	0	0.847	1	0.3574	2	144557573
autoGCC_q6	2	204677807	rs231835	G	A	G	ADD	26777	0.212637	0.0478107	4.44747	8.72354e-06	G	ADD	8895	0.0130324	0.0798322	0.163248	0.870327	a	g	0.1599	0.041	9.642e-05	++	78.3	4.601	1	0.03195	2	203813084
autoGCC_q6	3	169347389	rs56062766	G	A	A	ADD	26828	-0.112701	0.0248063	-4.54323	5.56412e-06	A	ADD	8911	-0.0096283	0.0422018	-0.228149	0.819536	a	g	-0.0862	0.0214	5.523e-05	--	77.4	4.433	1	0.03524	3	169629601
autoGCC_q6	4	182942641	rs13134313	C	G	G	ADD	26335	0.0460377	0.00929751	4.95161	7.40555e-07	G	ADD	8739	-0.0251089	0.0161213	-1.5575	0.119388	c	g	-0.0283	0.0081	0.000446	-+	93.2	14.615	1	0.0001318	4	182021488
autoGCC_q6	5	38566685	rs13173729	A	C	C	ADD	26828	-0.103259	0.0229988	-4.48977	7.1597e-06	C	ADD	8911	0.058793	0.0385721	1.52424	0.127485	a	c	0.0608	0.0198	0.0021	+-	92.3	13.021	1	0.000308	5	38566583
autoGCC_q6	6	17535505	6:17535505_CT_C	CT	C	C	ADD	20544	-0.0674705	0.0138263	-4.87987	1.06949e-06	C	ADD	6781	-0.0287404	0.023836	-1.20576	0.227953	ct	c	0.0577	0.012	1.392e-06	++	49.4	1.975	1	0.1599	6	17535274
autoGCC_q6	7	32906450	rs567382666	G	A	A	ADD	26226	-0.221123	0.0500042	-4.42209	9.81443e-06	A	ADD	8722	-0.0426757	0.0875973	-0.48718	0.626143	a	g	-0.1773	0.0434	4.466e-05	--	68.1	3.13	1	0.07686	7	32866838
autoGCC_q6	8	20124402	rs1908810	A	T	A	ADD	26681	0.137709	0.0302041	4.55929	5.15544e-06	A	ADD	8856	0.0263089	0.0521767	0.504228	0.614114	a	t	-0.1097	0.0261	2.687e-05	--	70.7	3.414	1	0.06463	8	20266891
autoGCC_q6	11	77710112	rs4945231	C	A	A	ADD	26479	0.0593373	0.0134272	4.4192	9.94617e-06	A	ADD	8760	0.00425917	0.0230756	0.184574	0.853567	a	c	0.0454	0.0116	9.137e-05	++	76.5	4.256	1	0.03911	11	77999066
autoGCC_q6	11	89149981	rs11018609	T	C	C	ADD	23950	-0.0453547	0.0100808	-4.4991	6.85628e-06	C	ADD	7973	-0.00780399	0.0174429	-0.447402	0.654597	t	c	0.036	0.0087	3.801e-05	++	71.2	3.474	1	0.06234	11	89416813
autoGCC_q6	11	116487300	rs73011197	C	T	T	ADD	26828	-0.107503	0.0240159	-4.47634	7.62471e-06	T	ADD	8911	0.0450612	0.0414137	1.08807	0.276592	t	c	-0.0691	0.0208	0.0008795	-+	90.2	10.156	1	0.001438	11	116616583
autoGCC_q6	12	65339489	rs117675011	A	G	G	ADD	26757	0.191732	0.042337	4.52871	5.96006e-06	G	ADD	8886	-0.0260934	0.0726405	-0.359213	0.719444	a	g	-0.1365	0.0366	0.0001901	-+	85.1	6.712	1	0.009576	12	64945709
autoGCC_q6	13	40695287	rs745387821	CTTTCGGT	C	CTTTCGGT	ADD	26583	-0.066696	0.0130939	-5.09368	3.53583e-07	CTTTCGGT	ADD	8837	-0.00395401	0.0223633	-0.176808	0.859663	ctttcggt	c	0.0507	0.0113	7.292e-06	++	82.9	5.862	1	0.01547	13	40121150
autoGCC_q6	14	59623776	rs6573248	G	A	G	ADD	26444	0.0515403	0.0105887	4.86747	1.13686e-06	G	ADD	8786	0.0224853	0.0182027	1.23528	0.216761	a	g	0.0442	0.0092	1.376e-06	++	47.5	1.904	1	0.1677	14	59157058
autoGCC_q6	15	94643094	rs62026520	T	A	A	ADD	26351	-0.0549543	0.0121405	-4.52654	6.02186e-06	A	ADD	8746	0.0107196	0.0209479	0.511727	0.608855	a	t	-0.0384	0.0105	0.0002525	-+	86.4	7.358	1	0.006678	15	94099865
autoGCC_q6	16	66285507	rs1437202	C	A	A	ADD	26749	-0.151825	0.0292716	-5.18677	2.15532e-07	A	ADD	8890	0.0119338	0.0507765	0.235026	0.814194	a	c	-0.111	0.0254	1.208e-05	-+	87.2	7.807	1	0.005205	16	66251604
autoGCC_q6	17	32278776	17:32278776_AT_A	AT	A	A	ADD	22258	0.0503097	0.0109801	4.5819	4.63279e-06	A	ADD	7418	-0.00611129	0.0191679	-0.318829	0.749865	a	at	0.0364	0.0095	0.0001349	+-	84.7	6.524	1	0.01065	17	33951757
autoGCC_q6	17	79602383	rs561130827	T	TAA	T	ADD	23028	-0.0532012	0.00938449	-5.66906	1.45306e-08	T	ADD	7731	-0.0318876	0.016189	-1.96971	0.0489072	t	taa	0.0478	0.0081	3.806e-09	++	22.9	1.297	1	0.2547	17	81635357
autoGCC_q6	19	5809772	rs147434157	C	CT	CT	ADD	26066	0.0849169	0.0191804	4.42728	9.58159e-06	CT	ADD	8657	0.0577155	0.032038	1.80147	0.0716642	ct	c	0.0777	0.0165	2.313e-06	++	0	0.531	1	0.4663	19	5809761
autoGCC_q6	21	22059932	rs2826476	G	A	A	ADD	26778	-0.107226	0.0231347	-4.63487	3.58843e-06	A	ADD	8894	0.0251219	0.040609	0.618629	0.536177	a	g	-0.0748	0.0201	0.0001985	-+	87.5	8.019	1	0.004629	21	20687618
autoGCC_q6	22	42817652	rs9623589	T	G	G	ADD	26443	-0.0442476	0.00948272	-4.66613	3.08433e-06	G	ADD	8782	-0.0168722	0.0166069	-1.01598	0.309669	t	g	0.0375	0.0082	5.217e-06	++	51.2	2.049	1	0.1523	22	42421646
trait	CHROM	POS	ID	REF	ALT	A1	TEST	OBS_CT	BETA	SE	T_STAT	P	A1.repl	TEST.repl	OBS_CT.repl	BETA.repl	SE.repl	T_STAT.repl	P.repl	Allele1	Allele2	Effect	StdErr	P-value	Direction	HetISq	HetChiSq	HetDf	HetPVal	CHROM_b38	POS_b38
autoGCC_q8	1	156501594	1:156501594_AC_A	AC	A	A	ADD	26658	0.109528	0.0236718	4.62693	3.72875e-06	A	ADD	8846	0.0263876	0.041097	0.642081	0.520837	a	ac	0.0888	0.0205	1.492e-05	++	67.5	3.073	1	0.0796	1	156531802
autoGCC_q8	2	12823341	rs62124720	T	C	C	ADD	26694	-0.0617257	0.0139531	-4.42378	9.73702e-06	C	ADD	8866	0.0127838	0.0246555	0.518497	0.604124	t	c	0.0437	0.0121	0.0003248	+-	85.5	6.917	1	0.008537	2	12683215
autoGCC_q8	2	45913826	rs485350	C	T	T	ADD	26105	0.0424616	0.00927691	4.57713	4.73576e-06	T	ADD	8693	0.0188004	0.0161137	1.16673	0.24335	t	c	0.0366	0.008	5.394e-06	++	38.2	1.619	1	0.2032	2	45686687
autoGCC_q8	3	1144330	rs190404246	G	T	T	ADD	26044	-0.177337	0.0400784	-4.42475	9.69473e-06	T	ADD	8646	0.0313745	0.0678216	0.462604	0.64366	t	g	-0.1233	0.0345	0.0003516	-+	85.8	7.019	1	0.008065	3	1102646
autoGCC_q8	3	25144041	rs9861541	G	A	A	ADD	26595	0.0734418	0.0153919	4.77146	1.83867e-06	A	ADD	8857	0.00518181	0.0267128	0.193983	0.846194	a	g	0.0564	0.0133	2.325e-05	++	79.6	4.902	1	0.02682	3	25102550
autoGCC_q8	3	73964353	rs6784682	A	C	C	ADD	25611	0.0415246	0.00916852	4.52904	5.95185e-06	C	ADD	8496	-0.0148528	0.0160048	-0.92802	0.353424	a	c	-0.0276	0.008	0.0005232	-+	89.3	9.342	1	0.002239	3	73915202
autoGCC_q8	3	193394711	rs6809663	G	A	A	ADD	26691	0.0516284	0.0112051	4.60757	4.09285e-06	A	ADD	8871	-0.00750657	0.0193895	-0.387147	0.698657	a	g	0.0368	0.0097	0.0001473	+-	85.7	6.973	1	0.008275	3	193676922
autoGCC_q8	3	193788222	rs10933710	C	G	G	ADD	26035	0.0877089	0.0167787	5.2274	1.73237e-07	G	ADD	8672	0.0438956	0.0297369	1.47613	0.139945	c	g	-0.0771	0.0146	1.306e-07	--	39.3	1.647	1	0.1994	3	194070433
autoGCC_q8	4	60664952	rs142167572	T	TAC	TAC	ADD	21881	0.0608877	0.0129306	4.70881	2.50702e-06	TAC	ADD	7323	0.00509103	0.0227029	0.224245	0.822573	t	tac	-0.0472	0.0112	2.638e-05	--	78.1	4.561	1	0.03271	4	59799234
autoGCC_q8	4	154913251	rs2897076	T	C	C	ADD	26587	-0.0528868	0.0116222	-4.55048	5.37604e-06	C	ADD	8821	0.000186876	0.0203109	0.0092008	0.992659	t	c	0.0398	0.0101	7.979e-05	+-	80.6	5.144	1	0.02333	4	153992099
autoGCC_q8	4	176949288	rs11936126	T	A	A	ADD	25487	-0.0441026	0.00915816	-4.81567	1.47552e-06	A	ADD	8448	0.0143461	0.0160048	0.896363	0.370084	a	t	-0.0297	0.0079	0.000188	-+	90	10.047	1	0.001526	4	176028137
autoGCC_q8	4	187051822	rs75470212	T	A	A	ADD	26312	0.0849847	0.0186042	4.56803	4.94569e-06	A	ADD	8730	-0.015172	0.0326591	-0.464556	0.642261	a	t	0.0604	0.0162	0.0001846	+-	85.9	7.101	1	0.007705	4	186130668
autoGCC_q8	5	87098190	rs7719564	T	C	T	ADD	26363	-0.0915761	0.0176473	-5.18925	2.12702e-07	T	ADD	8755	0.0133691	0.0303135	0.441028	0.659204	t	c	0.065	0.0153	2.019e-05	+-	88.8	8.952	1	0.002772	5	87802373
autoGCC_q8	5	87688421	rs17318932	C	T	T	ADD	26828	-0.0788803	0.0174924	-4.50939	6.52882e-06	T	ADD	8911	-0.0145017	0.0302547	-0.479321	0.631722	t	c	-0.0628	0.0151	3.416e-05	--	70.5	3.394	1	0.06545	5	88392604
autoGCC_q8	6	32519013	rs28417075	A	T	T	ADD	24933	0.0784999	0.0176679	4.44309	8.90575e-06	T	ADD	8298	-0.0125125	0.0301165	-0.415469	0.677809	a	t	-0.0552	0.0152	0.0002923	-+	85.3	6.794	1	0.009145	6	32551236
autoGCC_q8	6	43925373	rs4382251	T	C	T	ADD	26129	-0.0432398	0.00883491	-4.8942	9.92964e-07	T	ADD	8690	0.0125311	0.0154051	0.813438	0.415989	t	c	0.0294	0.0077	0.0001226	+-	89.9	9.863	1	0.001687	6	43957636
autoGCC_q8	6	142037142	6:142037142_TC_T	TC	T	T	ADD	26302	-0.0922744	0.0185149	-4.98379	6.2746e-07	T	ADD	8749	-0.0227901	0.0330214	-0.690162	0.490111	t	tc	-0.0757	0.0161	2.805e-06	--	70.3	3.369	1	0.06645	6	141716005
autoGCC_q8	6	156536552	rs79318213	G	C	C	ADD	26828	-0.0887091	0.0194956	-4.55022	5.38257e-06	C	ADD	8911	0.0162277	0.0341534	0.475143	0.634697	c	g	-0.0629	0.0169	0.0002023	-+	86	7.12	1	0.007622	6	156215418
autoGCC_q8	7	1855531	rs7680	G	A	A	ADD	26626	-0.0582826	0.0127569	-4.5687	4.92953e-06	A	ADD	8842	-0.0209909	0.0221009	-0.949773	0.342254	a	g	-0.049	0.011	9.351e-06	--	53.2	2.136	1	0.1439	7	1815895
autoGCC_q8	8	6930173	rs7014990	A	G	A	ADD	26697	-0.0978388	0.0218121	-4.48553	7.30354e-06	A	ADD	8871	-0.0160172	0.0390769	-0.40989	0.681897	a	g	0.0784	0.019	3.847e-05	++	70.1	3.343	1	0.0675	8	7072651
autoGCC_q8	8	16939868	rs12545137	A	T	T	ADD	26800	-0.0901748	0.0170423	-5.29123	1.22449e-07	T	ADD	8904	0.00271429	0.0301117	0.0901407	0.928177	a	t	0.0676	0.0148	5.104e-06	+-	86.1	7.207	1	0.00726	8	17082359
autoGCC_q8	8	109296016	rs10091101	G	C	C	ADD	26755	-0.0439886	0.00992966	-4.43002	9.45968e-06	C	ADD	8893	-0.0115615	0.017226	-0.671162	0.502135	c	g	-0.0359	0.0086	3.003e-05	--	62.4	2.66	1	0.1029	8	108283787
autoGCC_q8	9	14782125	rs5896648	T	TCTAGGC	TCTAGGC	ADD	26562	0.0731233	0.0164748	4.43848	9.09599e-06	TCTAGGC	ADD	8820	0.0136708	0.0281928	0.484902	0.627758	t	tctaggc	-0.058	0.0142	4.566e-05	--	69.8	3.315	1	0.06865	9	14782127
autoGCC_q8	9	77385545	rs9919062	G	A	A	ADD	26456	0.0398431	0.00864238	4.61021	4.04148e-06	A	ADD	8767	-0.000562101	0.0152434	-0.036875	0.970586	a	g	0.03	0.0075	6.544e-05	+-	81.2	5.317	1	0.02112	9	74770629
autoGCC_q8	10	5478006	10:5478006_ATAGT_A	ATAGT	A	A	ADD	26657	-0.615009	0.137857	-4.46122	8.18288e-06	A	ADD	8865	-0.0140846	0.28834	-0.0488472	0.961042	a	atagt	-0.5032	0.1244	5.212e-05	--	71.7	3.535	1	0.06008	10	5436043
autoGCC_q8	10	70040111	rs10762201	A	G	A	ADD	26725	-0.0499307	0.0101209	-4.93341	8.12938e-07	A	ADD	8876	-0.047266	0.017675	-2.67418	0.00750502	a	g	0.0493	0.0088	2.023e-08	++	0	0.017	1	0.8959	10	68280354
autoGCC_q8	11	69301723	rs75560792	G	A	A	ADD	26669	0.0546577	0.01222	4.47282	7.75127e-06	A	ADD	8846	0.0122092	0.0213993	0.570543	0.568324	a	g	0.0442	0.0106	3.086e-05	++	66.3	2.967	1	0.08497	11	69486955
autoGCC_q8	12	6954864	rs5442	G	A	A	ADD	26828	-0.087218	0.0170893	-5.10367	3.35402e-07	A	ADD	8911	-0.00185823	0.0301407	-0.0616518	0.950841	a	g	-0.0665	0.0149	7.818e-06	--	83.5	6.069	1	0.01375	12	6845700
autoGCC_q8	12	46997419	rs113635091	G	T	T	ADD	26656	0.12562	0.0271729	4.62298	3.80047e-06	T	ADD	8852	-0.0929087	0.0462434	-2.00912	0.0445543	t	g	0.0695	0.0234	0.002998	+-	94	16.6	1	4.615e-05	12	46603636
autoGCC_q8	12	48721478	12:48721478_CA_C	CA	C	C	ADD	20186	-0.0579116	0.0124895	-4.63681	3.56039e-06	C	ADD	6734	0.0110227	0.0219889	0.501287	0.616186	ca	c	0.0411	0.0109	0.0001542	+-	86.5	7.431	1	0.006412	12	48327695
autoGCC_q8	13	39348361	rs78895707	T	C	C	ADD	24321	-0.0930702	0.0194294	-4.79017	1.67624e-06	C	ADD	8063	-0.0105377	0.0342234	-0.30791	0.758158	t	c	0.073	0.0169	1.577e-05	++	77.3	4.398	1	0.03598	13	38774224
autoGCC_q8	16	8716128	rs72766456	A	G	G	ADD	26648	0.0702715	0.0135909	5.17049	2.35173e-07	G	ADD	8847	0.0496123	0.0241169	2.05716	0.0397	a	g	-0.0653	0.0118	3.499e-08	--	0	0.557	1	0.4555	16	8622271
autoGCC_q8	16	11912687	rs112445081	G	T	T	ADD	24879	-0.068087	0.0141694	-4.80522	1.55484e-06	T	ADD	8260	-0.0276869	0.0249139	-1.11131	0.266469	t	g	-0.0582	0.0123	2.286e-06	--	49.7	1.987	1	0.1587	16	11818830
autoGCC_q8	17	30988673	17:30988673_CA_C	CA	C	CA	ADD	25220	0.0442401	0.00980734	4.51092	6.48381e-06	CA	ADD	8379	0.0344042	0.0170054	2.02313	0.0430918	ca	c	-0.0418	0.0085	8.727e-07	--	0	0.251	1	0.6163	17	32661655
autoGCC_q8	17	36926181	rs228288	T	A	A	ADD	26700	-0.0517555	0.01149	-4.5044	6.68417e-06	A	ADD	8874	0.00536393	0.0199831	0.268424	0.78838	a	t	-0.0376	0.01	0.0001625	-+	83.7	6.14	1	0.01321	17	38769928
autoGCC_q8	17	79529287	rs11150797	G	A	A	ADD	26542	0.0689285	0.0133902	5.14769	2.65597e-07	A	ADD	8805	0.0585591	0.0232752	2.51594	0.0118891	a	g	0.0663	0.0116	1.087e-08	++	0	0.149	1	0.6994	17	81562261
autoGCC_q8	17	79614932	17:79614932_TTAAC_T	TTAAC	T	TTAAC	ADD	26641	-0.0628736	0.00900133	-6.98493	2.91704e-12	TTAAC	ADD	8853	-0.0599523	0.0156855	-3.82215	0.000133201	t	ttaac	-0.0621	0.0078	1.711e-15	--	0	0.026	1	0.8717	17	81647906
autoGCC_q8	18	22054660	rs36039916	A	AT	A	ADD	23603	-0.0588869	0.012873	-4.57447	4.79854e-06	A	ADD	7842	-0.035714	0.0223804	-1.59577	0.11058	a	at	0.0531	0.0112	1.927e-06	++	0	0.806	1	0.3694	18	24474696
autoGCC_q8	18	66443971	rs56365325	G	C	C	ADD	26742	-0.0876056	0.0192631	-4.54784	5.44375e-06	C	ADD	8879	-0.0325289	0.0339307	-0.958687	0.337743	c	g	-0.0742	0.0168	9.5e-06	--	49.8	1.993	1	0.1581	18	68776734
trait	CHROM	POS	ID	REF	ALT	A1	TEST	OBS_CT	BETA	SE	T_STAT	P	A1.repl	TEST.repl	OBS_CT.repl	BETA.repl	SE.repl	T_STAT.repl	P.repl	Allele1	Allele2	Effect	StdErr	P-value	Direction	HetISq	HetChiSq	HetDf	HetPVal	CHROM_b38	POS_b38
autoRNFL_q0	1	82382290	rs3790905	A	C	C	ADD	26495	0.0415554	0.00930434	4.46623	7.99373e-06	C	ADD	8790	0.0384034	0.0159999	2.40023	0.0164056	a	c	-0.0408	0.008	4.031e-07	--	0	0.029	1	0.8648	1	81916606
autoRNFL_q0	1	237477384	rs1832390	A	G	G	ADD	26527	-0.14068	0.0312119	-4.50726	6.59516e-06	G	ADD	8804	-0.00769191	0.0540573	-0.142292	0.886853	a	g	0.1074	0.027	7.053e-05	++	78	4.539	1	0.03313	1	237314084
autoRNFL_q0	2	174838507	rs148607071	C	T	T	ADD	26625	0.152852	0.0292451	5.2266	1.73959e-07	T	ADD	8860	0.0932042	0.0495611	1.88059	0.0600602	t	c	0.1374	0.0252	4.841e-08	++	6.9	1.074	1	0.3	2	173973779
autoRNFL_q0	3	37867039	rs3845950	T	C	C	ADD	26795	0.0899922	0.0199778	4.50461	6.67754e-06	C	ADD	8893	-0.0411232	0.0353614	-1.16294	0.244885	t	c	-0.0583	0.0174	0.0008083	-+	90.4	10.422	1	0.001245	3	37825548
autoRNFL_q0	3	159054753	rs75159055	T	C	C	ADD	26683	-0.221033	0.0486269	-4.54548	5.50506e-06	C	ADD	8862	-0.132153	0.0830615	-1.59103	0.111639	t	c	0.1983	0.042	2.284e-06	++	0	0.853	1	0.3558	3	159336964
autoRNFL_q0	3	160361974	rs777506432	TCCACACAGTCTTTC	T	TCCACACAGTCTTTC	ADD	26150	-0.055954	0.0124449	-4.49615	6.94935e-06	TCCACACAGTCTTTC	ADD	8706	0.0164225	0.0212518	0.772758	0.439687	t	tccacacagtctttc	-0.0375	0.0107	0.0004842	-+	88.4	8.637	1	0.003294	3	160644186
autoRNFL_q0	4	42257861	rs114330669	G	A	A	ADD	26828	0.121975	0.0275321	4.43028	9.44831e-06	A	ADD	8911	-0.0218192	0.0479224	-0.455303	0.648902	a	g	0.0863	0.0239	0.0003008	+-	85.2	6.769	1	0.009275	4	42255844
autoRNFL_q0	4	65734657	rs548129970	A	G	G	ADD	24747	0.0671076	0.0148451	4.52053	6.19721e-06	G	ADD	8237	0.024209	0.0255294	0.948279	0.343015	a	g	-0.0563	0.0128	1.162e-05	--	52.6	2.11	1	0.1463	4	64868939
autoRNFL_q0	6	155378316	rs146577572	C	T	T	ADD	26647	0.129774	0.0289397	4.4843	7.34595e-06	T	ADD	8846	0.0134804	0.0528143	0.255241	0.798543	t	c	0.1029	0.0254	5.008e-05	++	73.2	3.729	1	0.05348	6	155057182
autoRNFL_q0	7	9347019	rs73042590	C	A	A	ADD	26828	0.128382	0.0287324	4.46821	7.92006e-06	A	ADD	8911	-0.0314437	0.0523001	-0.601217	0.54771	a	c	0.0913	0.0252	0.0002871	+-	86.1	7.174	1	0.007398	7	9307389
autoRNFL_q0	7	109878977	rs73209612	C	G	G	ADD	26355	-0.0468652	0.0105532	-4.44085	8.99677e-06	G	ADD	8738	0.00638504	0.0183483	0.34799	0.727856	c	g	0.0336	0.0091	0.0002369	+-	84.2	6.329	1	0.01188	7	110238920
autoRNFL_q0	8	77377527	rs17429485	C	T	T	ADD	26828	0.0688941	0.0151861	4.53664	5.74042e-06	T	ADD	8911	0.0113187	0.026272	0.430826	0.666605	t	c	0.0545	0.0131	3.423e-05	++	72.2	3.6	1	0.05778	8	76465292
autoRNFL_q0	9	135222173	rs34471360	T	TA	T	ADD	23384	0.056461	0.0123306	4.57894	4.69748e-06	T	ADD	7805	0.0131009	0.0207989	0.629884	0.528789	t	ta	-0.0452	0.0106	2.044e-05	--	68.9	3.216	1	0.07293	9	132346786
autoRNFL_q0	10	112590582	rs4918601	G	A	A	ADD	26551	-0.0392682	0.00866128	-4.53376	5.81961e-06	A	ADD	8815	0.00274108	0.015019	0.182507	0.855189	a	g	-0.0288	0.0075	0.0001249	-+	83	5.871	1	0.01539	10	110830824
autoRNFL_q0	12	10937355	rs73046574	A	G	G	ADD	26828	-0.0621858	0.0127297	-4.8851	1.03974e-06	G	ADD	8911	0.0358415	0.0223405	1.60433	0.108677	a	g	0.0382	0.0111	0.0005603	+-	93.1	14.534	1	0.0001376	12	10784756
autoRNFL_q0	12	54783302	rs12312270	G	T	T	ADD	26795	-0.263467	0.049913	-5.27854	1.31234e-07	T	ADD	8899	0.00507202	0.0865376	0.0586106	0.953264	t	g	-0.1964	0.0432	5.541e-06	-+	86.2	7.226	1	0.007187	12	54389518
autoRNFL_q0	12	125840374	rs11058149	C	T	T	ADD	25873	-0.0473611	0.0092403	-5.1255	2.98886e-07	T	ADD	8581	0.00367912	0.0158657	0.23189	0.816629	t	c	-0.0344	0.008	1.615e-05	-+	87.1	7.728	1	0.005437	12	125355828
autoRNFL_q0	13	39943522	rs1887475	T	A	T	ADD	26544	0.0556685	0.011683	4.76491	1.89938e-06	T	ADD	8809	0.00623678	0.0203485	0.306498	0.759233	a	t	0.0434	0.0101	1.828e-05	++	77.5	4.438	1	0.03514	13	39369385
autoRNFL_q0	13	44867294	rs9525935	A	G	G	ADD	26747	-0.0424259	0.00877992	-4.83215	1.35817e-06	G	ADD	8895	-0.0113548	0.0150933	-0.752308	0.451886	a	g	0.0346	0.0076	5.235e-06	++	68.4	3.166	1	0.07517	13	44293158
autoRNFL_q0	14	44302626	rs2415829	C	G	G	ADD	26166	-0.04991	0.0111443	-4.47853	7.54768e-06	G	ADD	8674	-0.0117849	0.0192478	-0.612275	0.540372	c	g	0.0403	0.0096	2.883e-05	++	66	2.938	1	0.0865	14	43833423
autoRNFL_q0	14	97820102	rs146809203	C	T	T	ADD	26589	0.201571	0.0415132	4.85559	1.2071e-06	T	ADD	8842	0.0814746	0.0687561	1.18498	0.236058	t	c	0.1695	0.0355	1.85e-06	++	55.3	2.236	1	0.1348	14	97353765
autoRNFL_q0	17	15844822	rs12453948	G	A	A	ADD	26323	-0.0595472	0.0130875	-4.54993	5.39043e-06	A	ADD	8781	0.00776416	0.0223085	0.348037	0.727821	a	g	-0.0423	0.0113	0.000178	-+	85.2	6.773	1	0.009255	17	15941508
autoRNFL_q0	20	6365190	rs2182711	G	A	G	ADD	26677	-0.0413496	0.00877075	-4.71448	2.43549e-06	G	ADD	8851	-0.00672406	0.0152634	-0.440534	0.659561	a	g	-0.0328	0.0076	1.654e-05	--	74.2	3.869	1	0.04919	20	6384543
autoRNFL_q0	20	14520959	rs17812761	T	C	C	ADD	26714	0.0435239	0.0096728	4.49962	6.83634e-06	C	ADD	8881	0.034319	0.016688	2.05651	0.0397621	t	c	-0.0412	0.0084	8.469e-07	--	0	0.228	1	0.6332	20	14540313
autoRNFL_q0	20	38288183	rs1622302	C	G	C	ADD	26192	-0.047201	0.0097295	-4.85133	1.2334e-06	C	ADD	8695	-0.00172977	0.0168699	-0.102536	0.918334	c	g	0.0359	0.0084	2.103e-05	++	81.7	5.452	1	0.01955	20	39659541
autoRNFL_q0	20	61059039	rs6089392	G	C	C	ADD	23784	-0.0437625	0.00969078	-4.51589	6.33542e-06	C	ADD	7868	-0.00833698	0.016689	-0.499551	0.617406	c	g	-0.0348	0.0084	3.237e-05	--	70.3	3.37	1	0.06641	20	62483983
trait	CHROM	POS	ID	REF	ALT	A1	TEST	OBS_CT	BETA	SE	T_STAT	P	A1.repl	TEST.repl	OBS_CT.repl	BETA.repl	SE.repl	T_STAT.repl	P.repl	Allele1	Allele2	Effect	StdErr	P-value	Direction	HetISq	HetChiSq	HetDf	HetPVal	CHROM_b38	POS_b38
autoRNFL_q1	1	51477088	rs12092511	G	A	A	ADD	26690	0.0391821	0.0087066	4.50027	6.81531e-06	A	ADD	8864	0.014037	0.0150701	0.931445	0.351649	a	g	0.0329	0.0075	1.285e-05	++	52.1	2.087	1	0.1485	1	51011416
autoRNFL_q1	1	184393318	rs10797966	G	A	A	ADD	26522	0.0527244	0.0110227	4.78326	1.73403e-06	A	ADD	8829	-0.00330763	0.0192187	-0.172104	0.863359	a	g	0.0389	0.0096	4.832e-05	+-	84.4	6.396	1	0.01144	1	184424184
autoRNFL_q1	1	200956558	1:200956558_GATAGGGTCTCGCC_G	GATAGGGTCTCGCC	G	G	ADD	26777	-0.554351	0.120441	-4.60269	4.18985e-06	G	ADD	8890	-0.262884	0.207251	-1.26844	0.204676	g	gatagggtctcgcc	-0.4808	0.1041	3.897e-06	--	32.4	1.478	1	0.224	1	200987430
autoRNFL_q1	2	5151624	rs146637313	C	T	T	ADD	25045	0.115836	0.0250651	4.62143	3.83e-06	T	ADD	8316	0.010807	0.0431299	0.250569	0.802153	t	c	0.0893	0.0217	3.763e-05	++	77.4	4.433	1	0.03525	2	5011491
autoRNFL_q1	2	137893788	rs1835803	G	C	G	ADD	26800	0.0511606	0.0101362	5.04731	4.51012e-07	G	ADD	8905	0.012906	0.0177876	0.725561	0.468127	c	g	0.0418	0.0088	2.09e-06	++	71.4	3.491	1	0.06169	2	137136218
autoRNFL_q1	2	159748073	rs56186450	T	C	C	ADD	25745	-0.0483507	0.00957846	-5.04785	4.49843e-07	C	ADD	8588	-0.0361628	0.016644	-2.17272	0.0298289	t	c	0.0453	0.0083	4.793e-08	++	0	0.403	1	0.5256	2	158891561
autoRNFL_q1	2	172533363	rs145670408	C	T	T	ADD	26250	0.11158	0.0238431	4.67977	2.88636e-06	T	ADD	8720	-0.0217471	0.0405778	-0.535936	0.592017	t	c	0.0774	0.0206	0.0001677	+-	87.5	8.025	1	0.004613	2	171676853
autoRNFL_q1	2	172895606	rs12052246	C	A	C	ADD	26646	-0.048018	0.00882681	-5.44001	5.37452e-08	C	ADD	8856	-0.0190066	0.0152714	-1.24459	0.213316	a	c	-0.0408	0.0076	9.677e-08	--	63	2.705	1	0.1	2	172030703
autoRNFL_q1	2	174838507	rs148607071	C	T	T	ADD	26625	-0.137604	0.0291718	-4.71702	2.40542e-06	T	ADD	8860	-0.0767563	0.0497105	-1.54407	0.122608	t	c	-0.122	0.0252	1.236e-06	--	10.3	1.114	1	0.2911	2	173973779
autoRNFL_q1	2	222686410	rs375580906	T	TTGTG	T	ADD	20417	-0.0469296	0.0105591	-4.44448	8.85687e-06	T	ADD	6764	0.0226408	0.0182909	1.23782	0.215825	t	ttgtg	0.0295	0.0091	0.001237	+-	90.8	10.851	1	0.0009875	2	221821690
autoRNFL_q1	3	146164112	rs79658898	G	C	C	ADD	26750	0.139304	0.0312775	4.45382	8.46982e-06	C	ADD	8887	-0.0260334	0.0531884	-0.489457	0.62453	c	g	0.0968	0.027	0.0003293	+-	86.1	7.18	1	0.007372	3	146446325
autoRNFL_q1	3	171621262	rs71308528	C	T	T	ADD	25212	-0.0551483	0.0117586	-4.69002	2.74604e-06	T	ADD	8374	-0.0183615	0.0203748	-0.901187	0.367515	t	c	-0.046	0.0102	6.405e-06	--	59.1	2.445	1	0.1179	3	171903472
autoRNFL_q1	3	171750333	rs6782430	G	A	A	ADD	25124	-0.049301	0.0107446	-4.58845	4.48712e-06	A	ADD	8320	0.011004	0.0184206	0.597372	0.550276	a	g	-0.034	0.0093	0.0002498	-+	87.5	7.997	1	0.004686	3	172032543
autoRNFL_q1	3	181376530	3:181376530_GTT_G	GTT	G	G	ADD	22349	-0.0514823	0.0114893	-4.48087	7.47081e-06	G	ADD	7433	0.00986061	0.0199915	0.493239	0.621858	g	gtt	-0.0363	0.01	0.0002735	-+	85.9	7.078	1	0.007805	3	181658742
autoRNFL_q1	3	188035022	rs557152465	G	GT	GT	ADD	24770	0.0905135	0.0204628	4.42331	9.7613e-06	GT	ADD	8221	0.00653499	0.0350954	0.186207	0.852287	g	gt	-0.0692	0.0177	9.04e-05	--	76.6	4.273	1	0.03872	3	188317234
autoRNFL_q1	4	106205295	rs2466919	T	A	A	ADD	24846	0.0434318	0.00929975	4.67021	3.02471e-06	A	ADD	8224	0.00999119	0.0162412	0.615176	0.538455	a	t	0.0352	0.0081	1.309e-05	++	68.7	3.193	1	0.07397	4	105284138
autoRNFL_q1	4	181928515	rs10022243	T	C	C	ADD	26616	-0.0528233	0.0118173	-4.47001	7.85371e-06	C	ADD	8847	-0.00425283	0.0205014	-0.207441	0.83567	t	c	0.0407	0.0102	7e-05	++	76.3	4.213	1	0.04012	4	181007362
autoRNFL_q1	5	173242870	rs143726108	C	G	G	ADD	26487	-0.113512	0.0254056	-4.46801	7.92782e-06	G	ADD	8800	-0.0401815	0.0430153	-0.93412	0.350267	c	g	0.0945	0.0219	1.545e-05	++	53.6	2.155	1	0.1421	5	173815867
autoRNFL_q1	6	50708315	rs34083239	A	AT	AT	ADD	26618	-0.040124	0.00907165	-4.42301	9.77195e-06	AT	ADD	8843	-0.0270002	0.0157892	-1.71004	0.0872928	a	at	0.0369	0.0079	2.773e-06	++	0	0.519	1	0.4711	6	50740602
autoRNFL_q1	6	71223996	rs11756165	C	T	T	ADD	26501	-0.172301	0.0355792	-4.84275	1.28774e-06	T	ADD	8795	0.0410969	0.0648263	0.633954	0.526127	t	c	-0.1229	0.0312	8.136e-05	-+	88	8.328	1	0.003904	6	70514293
autoRNFL_q1	6	91846477	rs9345100	G	A	G	ADD	26538	0.0569847	0.0120877	4.71429	2.43791e-06	G	ADD	8818	0.00789624	0.0209032	0.377752	0.705624	a	g	0.0447	0.0105	1.953e-05	++	75.8	4.133	1	0.04206	6	91136759
autoRNFL_q1	7	6951866	rs112118330	G	A	G	ADD	24011	-0.0408775	0.00923396	-4.42687	9.60334e-06	G	ADD	7968	0.0219826	0.0162203	1.35526	0.175375	a	g	-0.0255	0.008	0.00149	-+	91.2	11.343	1	0.0007574	7	6912235
autoRNFL_q1	8	109182244	rs7816434	T	C	C	ADD	26779	0.0641845	0.00986595	6.50566	7.8717e-11	C	ADD	8903	0.0504245	0.0171097	2.94713	0.00321574	t	c	-0.0608	0.0085	1.177e-12	--	0	0.485	1	0.486	8	108170015
autoRNFL_q1	9	98281901	rs57560832	C	T	T	ADD	25937	-0.048067	0.0103142	-4.66029	3.17337e-06	T	ADD	8609	0.0140915	0.0179915	0.783232	0.433512	t	c	-0.0327	0.0089	0.0002587	-+	88.9	8.984	1	0.002724	9	95519619
autoRNFL_q1	10	58000818	rs141168563	T	C	C	ADD	26817	0.217709	0.0489316	4.44925	8.65155e-06	C	ADD	8907	-0.126416	0.0915837	-1.38034	0.167517	t	c	-0.1413	0.0432	0.001061	-+	90.9	10.983	1	0.0009193	10	56241057
autoRNFL_q1	10	70030464	rs10762199	T	C	C	ADD	26716	0.0466791	0.010239	4.55896	5.16344e-06	C	ADD	8881	0.049662	0.0177304	2.80096	0.0051061	t	c	-0.0474	0.0089	8.861e-08	--	0	0.021	1	0.8842	10	68270707
autoRNFL_q1	10	120768921	rs79406101	T	A	A	ADD	26777	0.345012	0.0726121	4.75143	2.03031e-06	A	ADD	8886	0.0291802	0.132086	0.220918	0.825161	a	t	0.2717	0.0636	1.953e-05	++	77.2	4.391	1	0.03614	10	119009409
autoRNFL_q1	12	480192	rs9739782	T	C	C	ADD	26773	-0.532637	0.1203	-4.42756	9.56803e-06	C	ADD	8901	0.49805	0.241643	2.0611	0.0393227	t	c	0.3279	0.1077	0.002327	+-	93.1	14.58	1	0.0001344	12	371026
autoRNFL_q1	13	39943522	rs1887475	T	A	T	ADD	26544	-0.0577974	0.0116573	-4.95806	7.16399e-07	T	ADD	8809	-0.00150189	0.0204235	-0.0735371	0.94138	a	t	-0.044	0.0101	1.409e-05	--	82.6	5.731	1	0.01667	13	39369385
autoRNFL_q1	13	58390032	rs4357828	A	C	A	ADD	26828	-0.0939019	0.0211167	-4.44681	8.75042e-06	A	ADD	8911	0.0239196	0.0363626	0.657807	0.510679	a	c	0.0642	0.0183	0.0004396	+-	87.3	7.851	1	0.005079	13	57815898
autoRNFL_q1	13	58549354	rs1436692	A	G	A	ADD	26823	-0.454398	0.102849	-4.41811	9.99596e-06	A	ADD	8907	0.226483	0.160616	1.41009	0.158548	a	g	0.2564	0.0866	0.003074	+-	92.2	12.745	1	0.000357	13	57975220
autoRNFL_q1	14	23034339	rs75551720	A	G	G	ADD	26828	0.128136	0.0267306	4.79361	1.64685e-06	G	ADD	8911	-0.0536282	0.0484064	-1.10787	0.267946	a	g	-0.0857	0.0234	0.0002515	-+	90.7	10.805	1	0.001012	14	22565439
autoRNFL_q1	14	74583005	14:74583005_CAAAAAAT_C	CAAAAAAT	C	C	ADD	26175	-0.0803639	0.0146653	-5.47989	4.29525e-08	C	ADD	8712	-0.0257123	0.0254089	-1.01194	0.311595	caaaaaat	c	0.0667	0.0127	1.505e-07	++	71.2	3.47	1	0.06248	14	74116302
autoRNFL_q1	16	5083209	rs35962888	G	A	A	ADD	26828	-0.0585734	0.0122372	-4.78648	1.70634e-06	A	ADD	8911	-0.0131264	0.0214441	-0.612121	0.540473	a	g	-0.0474	0.0106	8.172e-06	--	70.5	3.388	1	0.06567	16	5033208
autoRNFL_q1	16	79332653	rs60575404	G	C	C	ADD	26589	0.0694473	0.0156113	4.44853	8.68105e-06	C	ADD	8845	0.0198046	0.0273537	0.724019	0.469074	c	g	0.0573	0.0136	2.416e-05	++	59.7	2.484	1	0.115	16	79298756
autoRNFL_q1	17	15844822	rs12453948	G	A	A	ADD	26323	0.0601808	0.0130553	4.60968	4.05191e-06	A	ADD	8781	-0.0149679	0.0223982	-0.668262	0.503984	a	g	0.0411	0.0113	0.0002663	+-	88.1	8.402	1	0.003748	17	15941508
autoRNFL_q1	17	78905799	rs191482482	A	C	C	ADD	26828	-0.139912	0.0314975	-4.442	8.94835e-06	C	ADD	8911	0.0262536	0.0569599	0.460914	0.644872	a	c	0.101	0.0276	0.0002481	+-	84.7	6.517	1	0.01068	17	80931999
autoRNFL_q1	17	80280865	rs11077986	G	A	G	ADD	25259	0.0397234	0.00882357	4.50197	6.76285e-06	G	ADD	8396	-0.0107536	0.0153047	-0.702635	0.482303	a	g	0.0271	0.0076	0.0003863	+-	87.8	8.164	1	0.004273	17	82322989
autoRNFL_q1	18	13840895	rs4550522	C	T	T	ADD	26816	0.0998021	0.0216337	4.61328	3.98198e-06	T	ADD	8905	-0.0226888	0.0380946	-0.595592	0.551463	t	c	0.0699	0.0188	0.0002013	+-	87.2	7.818	1	0.005173	18	13840896
autoRNFL_q1	18	23091083	rs75026211	C	T	T	ADD	26712	0.129327	0.0292002	4.42897	9.50596e-06	T	ADD	8867	0.0517351	0.0525094	0.985253	0.324527	t	c	0.111	0.0255	1.364e-05	++	40	1.668	1	0.1966	18	25511119
autoRNFL_q1	19	9609440	rs114338228	G	A	A	ADD	25953	0.0883898	0.0197468	4.47617	7.63183e-06	A	ADD	8636	-0.0149576	0.0348853	-0.428764	0.668106	a	g	0.0633	0.0172	0.0002294	+-	85	6.647	1	0.009934	19	9498764
autoRNFL_q1	19	16676625	19:16676625_CTTTTTTTTTTT_C	CTTTTTTTTTTT	C	C	ADD	25543	0.0688028	0.0149388	4.60564	4.13189e-06	C	ADD	8469	0.0244759	0.0258889	0.94542	0.344472	cttttttttttt	c	-0.0577	0.0129	8.132e-06	--	54.5	2.199	1	0.1381	19	16565814
autoRNFL_q1	19	38553206	rs4803708	T	C	C	ADD	26266	-0.0442153	0.00941355	-4.69698	2.65366e-06	C	ADD	8751	-0.0136949	0.0163542	-0.837398	0.402392	t	c	0.0366	0.0082	7.172e-06	++	61.8	2.616	1	0.1058	19	38062566
autoRNFL_q1	20	6373187	rs355533	T	C	T	ADD	26787	0.0459084	0.00920173	4.9891	6.10396e-07	T	ADD	8900	0.0143579	0.0160574	0.894161	0.37126	t	c	-0.0381	0.008	1.812e-06	--	65.6	2.906	1	0.08824	20	6392540
autoRNFL_q1	21	16384581	rs74772907	A	G	G	ADD	26807	0.425317	0.0889605	4.78096	1.75384e-06	G	ADD	8909	0.0864831	0.159914	0.540809	0.588653	a	g	-0.3452	0.0777	8.958e-06	--	70.8	3.429	1	0.06408	21	15012260
autoRNFL_q1	21	34957976	21:34957976_CTTCT_C	CTTCT	C	C	ADD	26806	-0.545029	0.118643	-4.59386	4.37094e-06	C	ADD	8907	0.286588	0.175838	1.62984	0.103171	cttct	c	0.2849	0.0983	0.003774	+-	93.5	15.37	1	8.837e-05	21	33585670
autoRNFL_q1	21	39576478	rs141752466	A	AAT	AAT	ADD	26616	-0.0410414	0.00858422	-4.78102	1.75336e-06	AAT	ADD	8850	0.0102193	0.0150119	0.680749	0.496048	a	aat	0.0284	0.0075	0.0001376	+-	88.6	8.787	1	0.003034	21	38204384
trait	CHROM	POS	ID	REF	ALT	A1	TEST	OBS_CT	BETA	SE	T_STAT	P	A1.repl	TEST.repl	OBS_CT.repl	BETA.repl	SE.repl	T_STAT.repl	P.repl	Allele1	Allele2	Effect	StdErr	P-value	Direction	HetISq	HetChiSq	HetDf	HetPVal	CHROM_b38	POS_b38
autoRNFL_q3	1	33567097	1:33567097_AT_A	AT	A	A	ADD	21432	0.0444285	0.00980954	4.52911	5.95525e-06	A	ADD	7153	0.00916046	0.0170379	0.537654	0.590833	a	at	0.0356	0.0085	2.749e-05	++	68.9	3.218	1	0.07283	1	33101496
autoRNFL_q3	3	34003963	rs145847870	T	A	A	ADD	26406	0.142959	0.030754	4.64849	3.35994e-06	A	ADD	8773	-0.132334	0.0545339	-2.42663	0.0152598	a	t	0.0765	0.0268	0.004277	+-	94.8	19.334	1	1.097e-05	3	33962471
autoRNFL_q3	4	17558403	rs371895286	G	GAA	G	ADD	25069	0.0478319	0.0104615	4.57219	4.84963e-06	G	ADD	8364	0.00517692	0.0184229	0.281005	0.778714	g	gaa	-0.0374	0.0091	3.878e-05	--	75.3	4.054	1	0.04408	4	17556780
autoRNFL_q3	4	48360977	rs366168	A	T	T	ADD	26789	-0.0462108	0.00912641	-5.06342	4.14536e-07	T	ADD	8902	0.0111404	0.0159057	0.700399	0.483697	a	t	0.032	0.0079	5.272e-05	+-	89.8	9.781	1	0.001763	4	48358960
autoRNFL_q3	5	56428851	rs331025	G	A	A	ADD	26562	0.0539171	0.0110587	4.87552	1.09148e-06	A	ADD	8816	-0.0108453	0.0191816	-0.5654	0.571816	a	g	0.0378	0.0096	8.099e-05	+-	88.3	8.556	1	0.003445	5	57133024
autoRNFL_q3	5	77165461	rs4235705	A	G	A	ADD	24939	-0.0689261	0.0140661	-4.90017	9.63555e-07	A	ADD	8290	-0.0117774	0.0242592	-0.485483	0.627347	a	g	0.0545	0.0122	7.373e-06	++	75.9	4.153	1	0.04155	5	77869637
autoRNFL_q3	5	177627170	rs2913816	G	A	A	ADD	25803	-0.0432698	0.0092232	-4.69141	2.7272e-06	A	ADD	8538	0.0124205	0.016192	0.767076	0.443057	a	g	-0.0296	0.008	0.0002183	-+	88.8	8.931	1	0.002803	5	178200169
autoRNFL_q3	6	23538076	6:23538076_CCT_C	CCT	C	C	ADD	26478	-0.0630757	0.0141524	-4.45689	8.34977e-06	C	ADD	8800	-0.0548354	0.0245807	-2.23083	0.0257177	cct	c	0.061	0.0123	6.506e-07	++	0	0.084	1	0.7714	6	23537848
autoRNFL_q3	6	32453191	rs6916742	T	C	T	ADD	25963	0.0420019	0.00909683	4.61721	3.90805e-06	T	ADD	8659	-0.000679694	0.0158051	-0.0430048	0.965699	t	c	-0.0314	0.0079	6.884e-05	-+	81.7	5.478	1	0.01926	6	32485414
autoRNFL_q3	7	6861743	rs4720684	G	A	A	ADD	22033	0.0579711	0.0116228	4.98769	6.1569e-07	A	ADD	7254	0.00554419	0.0204355	0.271302	0.786167	a	g	0.0452	0.0101	7.835e-06	++	79.9	4.973	1	0.02575	7	6822112
autoRNFL_q3	7	7034805	rs4724905	G	C	G	ADD	25622	-0.127591	0.0261843	-4.87283	1.10668e-06	G	ADD	8477	0.0116406	0.0456731	0.254868	0.798831	c	g	-0.0931	0.0227	4.121e-05	-+	85.7	6.994	1	0.008177	7	6995174
autoRNFL_q3	7	120901720	rs62621839	G	A	A	ADD	26828	-0.139218	0.0313256	-4.44424	8.85545e-06	A	ADD	8911	0.0189888	0.0545238	0.348266	0.727649	a	g	-0.1	0.0272	0.0002332	-+	84.2	6.33	1	0.01187	7	121261666
autoRNFL_q3	8	109154652	rs424012	A	G	A	ADD	26767	0.0455493	0.00852414	5.34357	9.18803e-08	A	ADD	8893	0.0212491	0.0148321	1.43265	0.151994	a	g	-0.0395	0.0074	8.952e-08	--	50.4	2.018	1	0.1555	8	108142424
autoRNFL_q3	9	78722328	rs2297343	C	T	T	ADD	26771	-0.0857775	0.0190222	-4.50934	6.53041e-06	T	ADD	8889	-0.0387059	0.0316263	-1.22385	0.22104	t	c	-0.0733	0.0163	6.956e-06	--	38.5	1.627	1	0.2022	9	76107412
autoRNFL_q3	10	7426447	10:7426447_CTTT_C	CTTT	C	CTTT	ADD	26599	-0.0666367	0.0144246	-4.61964	3.86208e-06	CTTT	ADD	8836	-0.0348012	0.0254694	-1.36639	0.17185	cttt	c	0.0589	0.0126	2.691e-06	++	15.5	1.183	1	0.2768	10	7384485
autoRNFL_q3	10	69991853	rs7916697	A	G	A	ADD	26828	-0.0810054	0.00988566	-8.19423	2.6333e-16	A	ADD	8911	-0.0553321	0.0173344	-3.19203	0.00141766	a	g	0.0747	0.0086	3.337e-18	++	39.6	1.655	1	0.1983	10	68232096
autoRNFL_q3	11	3259478	rs10833535	G	A	A	ADD	26606	0.0411887	0.00851937	4.83471	1.34083e-06	A	ADD	8809	-0.00863352	0.0149805	-0.576319	0.564414	a	g	0.029	0.0074	8.938e-05	+-	88	8.358	1	0.00384	11	3238248
autoRNFL_q3	12	31313551	rs2536919	T	G	T	ADD	24983	-0.0403762	0.00885889	-4.5577	5.1961e-06	T	ADD	8289	-0.0245142	0.0153789	-1.59401	0.110972	t	g	0.0364	0.0077	2.085e-06	++	0	0.799	1	0.3715	12	31160617
autoRNFL_q3	13	85921038	rs9531774	C	A	C	ADD	26052	0.041714	0.00861018	4.84473	1.27515e-06	C	ADD	8613	-0.0201866	0.0150561	-1.34076	0.180033	a	c	0.0265	0.0075	0.0004001	+-	92.1	12.737	1	0.0003584	13	85346903
autoRNFL_q3	14	61072875	rs10483727	T	C	T	ADD	26828	-0.0521964	0.00870857	-5.99369	2.07754e-09	T	ADD	8911	-0.0509777	0.0153796	-3.31463	0.000921323	t	c	0.0519	0.0076	7.446e-12	++	0	0.005	1	0.945	14	60606157
autoRNFL_q3	14	105302093	14:105302093_GTGTGCTTGTTGACCATTTATC_G	GTGTGCTTGTTGACCATTTATC	G	G	ADD	26140	0.146447	0.0289952	5.05074	4.4307e-07	G	ADD	8651	-0.0556643	0.052446	-1.06136	0.288554	g	gtgtgcttgttgaccatttatc	0.0991	0.0254	9.358e-05	+-	91.2	11.374	1	0.0007446	14	104835756
autoRNFL_q3	15	61829676	rs11635358	C	A	A	ADD	26337	-0.0534746	0.00972924	-5.49628	3.91491e-08	A	ADD	8738	-0.0111163	0.0169738	-0.654908	0.512544	a	c	-0.043	0.0084	3.503e-07	--	78.7	4.688	1	0.03038	15	61537477
autoRNFL_q3	17	73060073	rs11077773	T	C	C	ADD	26828	0.0741588	0.0157263	4.71559	2.42222e-06	C	ADD	8911	0.0166475	0.0272487	0.610947	0.54125	t	c	-0.0598	0.0136	1.136e-05	--	70.1	3.342	1	0.06755	17	75063978
autoRNFL_q3	19	19776427	rs146284512	C	T	T	ADD	26510	0.179192	0.0399587	4.48443	7.34169e-06	T	ADD	8818	0.00270372	0.0695661	0.0388655	0.968998	t	c	0.1354	0.0346	9.308e-05	++	79.3	4.84	1	0.02781	19	19665618
autoRNFL_q3	19	40684419	rs76658899	G	A	A	ADD	26797	0.366689	0.0722888	5.07256	3.95117e-07	A	ADD	8899	0.0521635	0.115111	0.453158	0.650446	a	g	0.2777	0.0612	5.713e-06	++	81.3	5.354	1	0.02067	19	40178512
autoRNFL_q3	20	14542630	20:14542630_AT_A	AT	A	AT	ADD	26724	-0.0587741	0.00920668	-6.38386	1.75513e-10	AT	ADD	8879	-0.0316912	0.0160816	-1.97064	0.0487957	a	at	-0.0521	0.008	7.065e-11	--	53.2	2.136	1	0.1439	20	14561984
autoRNFL_q3	20	22554341	rs143192053	G	T	T	ADD	26754	0.144475	0.0310317	4.65574	3.24371e-06	T	ADD	8888	0.023652	0.0525608	0.449994	0.652726	t	g	0.1132	0.0267	2.256e-05	++	74.5	3.918	1	0.04776	20	22573703
autoRNFL_q3	21	30714598	rs411697	G	A	A	ADD	26743	0.0394059	0.0088794	4.4379	9.12045e-06	A	ADD	8894	-0.0231257	0.0154465	-1.49715	0.134389	a	g	0.0239	0.0077	0.001926	+-	91.9	12.318	1	0.0004486	21	29342277
trait	CHROM	POS	ID	REF	ALT	A1	TEST	OBS_CT	BETA	SE	T_STAT	P	A1.repl	TEST.repl	OBS_CT.repl	BETA.repl	SE.repl	T_STAT.repl	P.repl	Allele1	Allele2	Effect	StdErr	P-value	Direction	HetISq	HetChiSq	HetDf	HetPVal	CHROM_b38	POS_b38
autoRNFL_q4	1	82382290	rs3790905	A	C	C	ADD	26495	-0.0486536	0.00928412	-5.24052	1.61351e-07	C	ADD	8790	-0.0604983	0.0160454	-3.77044	0.000164028	a	c	0.0516	0.008	1.325e-10	++	0	0.408	1	0.5229	1	81916606
autoRNFL_q4	1	151578583	rs564165671	T	TAA	T	ADD	22914	-0.0469678	0.00985357	-4.76658	1.8853e-06	T	ADD	7663	0.0180478	0.0173537	1.03999	0.298377	t	taa	0.0311	0.0086	0.0002818	+-	90.6	10.614	1	0.001122	1	151606107
autoRNFL_q4	1	151858079	rs115847329	T	C	C	ADD	26702	-0.128629	0.0290846	-4.42257	9.79188e-06	C	ADD	8870	0.0338334	0.0518187	0.652919	0.513826	t	c	0.0897	0.0254	0.0004046	+-	86.6	7.475	1	0.006257	1	151885603
autoRNFL_q4	1	200956558	1:200956558_GATAGGGTCTCGCC_G	GATAGGGTCTCGCC	G	G	ADD	26777	-0.560972	0.120489	-4.65578	3.24298e-06	G	ADD	8890	-0.0299032	0.206934	-0.144506	0.885104	g	gatagggtctcgcc	-0.4265	0.1041	4.2e-05	--	79.7	4.919	1	0.02657	1	200987430
autoRNFL_q4	1	210675102	rs7544655	C	T	C	ADD	26828	0.0479013	0.0101158	4.73528	2.19871e-06	C	ADD	8911	-0.00824776	0.0174687	-0.472144	0.636836	t	c	0.0338	0.0088	0.0001128	+-	87.1	7.737	1	0.00541	1	210501758
autoRNFL_q4	1	213061308	rs17677416	T	C	C	ADD	26505	0.101464	0.0224797	4.51358	6.40174e-06	C	ADD	8813	0.00542631	0.0397496	0.136512	0.891419	t	c	-0.0782	0.0196	6.441e-05	--	77.4	4.423	1	0.03546	1	212887966
autoRNFL_q4	2	174838507	rs148607071	C	T	T	ADD	26625	-0.136041	0.0291814	-4.66192	3.14796e-06	T	ADD	8860	-0.129775	0.0496372	-2.61448	0.00895153	t	c	-0.1344	0.0252	9.098e-08	--	0	0.012	1	0.9133	2	173973779
autoRNFL_q4	3	13615170	rs60651453	A	G	G	ADD	26820	-0.186538	0.0416912	-4.47427	7.6987e-06	G	ADD	8910	-0.0758122	0.0688184	-1.10163	0.270654	a	g	0.1568	0.0357	1.094e-05	++	47.2	1.894	1	0.1688	3	13573670
autoRNFL_q4	3	160361974	rs777506432	TCCACACAGTCTTTC	T	TCCACACAGTCTTTC	ADD	26150	0.0574988	0.0124175	4.63044	3.66636e-06	TCCACACAGTCTTTC	ADD	8706	-0.0318048	0.0212602	-1.49598	0.134695	t	tccacacagtctttc	0.0348	0.0107	0.001179	+-	92.4	13.156	1	0.0002866	3	160644186
autoRNFL_q4	3	181376530	3:181376530_GTT_G	GTT	G	G	ADD	22349	-0.0510223	0.0114643	-4.45053	8.60722e-06	G	ADD	7433	-0.00621808	0.0199372	-0.311883	0.755138	g	gtt	-0.0399	0.0099	5.979e-05	--	73.7	3.795	1	0.0514	3	181658742
autoRNFL_q4	4	39796980	rs11097003	T	C	T	ADD	24847	0.0398549	0.00892726	4.46441	8.06423e-06	T	ADD	8267	0.0136449	0.0154418	0.883633	0.37692	t	c	-0.0333	0.0077	1.653e-05	--	53.7	2.159	1	0.1417	4	39795360
autoRNFL_q4	4	83136950	rs115318995	T	A	A	ADD	25345	0.0844622	0.0186717	4.52353	6.10928e-06	A	ADD	8410	-0.0505422	0.0326499	-1.548	0.121659	a	t	0.0512	0.0162	0.001587	+-	92.2	12.884	1	0.0003314	4	82215797
autoRNFL_q4	4	148892092	rs56834952	G	A	A	ADD	26754	-0.0676824	0.0150879	-4.48588	7.29142e-06	A	ADD	8880	-0.0382918	0.0260796	-1.46827	0.142067	a	g	-0.0603	0.0131	3.872e-06	--	0	0.952	1	0.3293	4	147970941
autoRNFL_q4	4	157893384	rs80094122	G	C	C	ADD	26651	-0.286208	0.0612037	-4.67632	2.93497e-06	C	ADD	8861	-0.0320659	0.114927	-0.279011	0.780243	c	g	-0.2301	0.054	2.057e-05	--	73.8	3.81	1	0.05096	4	156972232
autoRNFL_q4	5	1906224	rs10077686	T	C	C	ADD	26828	-0.0624903	0.0136106	-4.5913	4.4249e-06	C	ADD	8911	-0.00135989	0.0238428	-0.0570357	0.954518	t	c	0.0475	0.0118	5.929e-05	++	79.8	4.958	1	0.02597	5	1906110
autoRNFL_q4	5	43891436	rs35029702	G	A	A	ADD	26388	-0.0745489	0.0146415	-5.09161	3.57485e-07	A	ADD	8767	0.0312866	0.0258121	1.21209	0.22551	a	g	-0.0488	0.0127	0.0001278	-+	92.1	12.719	1	0.0003619	5	43891334
autoRNFL_q4	5	173276896	rs10078452	T	C	C	ADD	26798	0.043142	0.00920624	4.68617	2.79732e-06	C	ADD	8904	-0.0200525	0.0158283	-1.26687	0.205234	t	c	-0.0272	0.008	0.0006405	-+	91.6	11.911	1	0.0005581	5	173849893
autoRNFL_q4	6	22883671	rs113190816	G	A	A	ADD	26541	0.0793108	0.0175987	4.50663	6.61466e-06	A	ADD	8819	-0.0374092	0.0311022	-1.20278	0.229092	a	g	0.051	0.0153	0.0008687	+-	90.6	10.668	1	0.00109	6	22883442
autoRNFL_q4	6	112978194	rs6903991	C	T	T	ADD	26489	0.0398153	0.00885594	4.49588	6.95764e-06	T	ADD	8816	-0.0146894	0.0152573	-0.962775	0.335687	t	c	0.0261	0.0077	0.0006616	+-	89.5	9.546	1	0.002004	6	112656992
autoRNFL_q4	7	100485157	rs144377758	C	T	T	ADD	26022	0.184051	0.0410634	4.48211	7.42229e-06	T	ADD	8647	-0.0209595	0.0729466	-0.287327	0.773869	t	c	0.1347	0.0358	0.0001666	+-	83.3	5.998	1	0.01432	7	100887536
autoRNFL_q4	8	27758391	rs7002838	C	G	G	ADD	26734	-0.122972	0.0264528	-4.64872	3.35601e-06	G	ADD	8877	-0.0301598	0.0440691	-0.684376	0.493756	c	g	0.0984	0.0227	1.438e-05	++	69.3	3.261	1	0.07096	8	27900874
autoRNFL_q4	8	109182244	rs7816434	T	C	C	ADD	26779	0.0489145	0.00986983	4.95597	7.24113e-07	C	ADD	8903	0.0392553	0.017091	2.29684	0.021651	t	c	-0.0465	0.0085	5.317e-08	--	0	0.24	1	0.6245	8	108170015
autoRNFL_q4	9	107953450	rs76092563	G	A	A	ADD	23205	-0.107238	0.0229304	-4.67665	2.9324e-06	A	ADD	7652	0.023655	0.0394785	0.599188	0.549066	a	g	-0.0742	0.0198	0.0001818	-+	87.8	8.22	1	0.004144	9	105191169
autoRNFL_q4	10	12874715	rs2431621	T	G	G	ADD	26765	-0.0390295	0.00858629	-4.54556	5.50302e-06	G	ADD	8894	-0.00841887	0.0150256	-0.560303	0.575287	t	g	0.0315	0.0075	2.393e-05	++	68	3.129	1	0.07693	10	12832715
autoRNFL_q4	10	70041583	rs4745956	C	T	C	ADD	26718	0.0485774	0.0100722	4.82294	1.42233e-06	C	ADD	8881	0.068212	0.017562	3.88406	0.000103475	t	c	0.0534	0.0087	9.593e-10	++	0	0.941	1	0.3321	10	68281826
autoRNFL_q4	11	65100506	11:65100506_GTA_G	GTA	G	GTA	ADD	26663	-0.0819871	0.0174481	-4.6989	2.62866e-06	GTA	ADD	8854	0.0321094	0.0311415	1.03108	0.30253	g	gta	-0.0547	0.0152	0.000324	-+	90.2	10.216	1	0.001392	11	65333035
autoRNFL_q4	12	480192	rs9739782	T	C	C	ADD	26773	-0.581016	0.120308	-4.82939	1.3771e-06	C	ADD	8901	0.431199	0.241365	1.78651	0.0740514	t	c	0.3796	0.1077	0.0004231	+-	92.9	14.087	1	0.0001745	12	371026
autoRNFL_q4	12	117380179	rs57576794	A	AT	A	ADD	19476	-0.061592	0.0133302	-4.62048	3.85316e-06	A	ADD	6471	0.00404684	0.0234098	0.172869	0.86276	a	at	0.0455	0.0116	8.508e-05	+-	83.2	5.937	1	0.01483	12	116942374
autoRNFL_q4	12	131928509	rs5018803	A	G	A	ADD	24279	0.0443446	0.00977488	4.53659	5.74456e-06	A	ADD	8076	-0.0168926	0.0169557	-0.996281	0.319144	a	g	-0.0291	0.0085	0.0005977	-+	89.8	9.79	1	0.001755	12	131443964
autoRNFL_q4	13	20943334	rs11394300	A	AT	A	ADD	26451	-0.0865466	0.0185322	-4.67006	3.02585e-06	A	ADD	8787	-0.0255079	0.031452	-0.81101	0.417382	a	at	0.0708	0.016	9.196e-06	++	64.2	2.796	1	0.09452	13	20369195
autoRNFL_q4	13	39943522	rs1887475	T	A	T	ADD	26544	-0.0553147	0.0116637	-4.74249	2.12209e-06	T	ADD	8809	-0.00903145	0.0204031	-0.44265	0.65803	a	t	-0.0439	0.0101	1.445e-05	--	74.2	3.878	1	0.04891	13	39369385
autoRNFL_q4	13	58549354	rs1436692	A	G	A	ADD	26823	-0.519552	0.10286	-5.05108	4.42203e-07	A	ADD	8907	0.105414	0.160404	0.657177	0.511084	a	g	0.3374	0.0866	9.732e-05	+-	90.7	10.757	1	0.001039	13	57975220
autoRNFL_q4	14	23034339	rs75551720	A	G	G	ADD	26828	0.129215	0.0267375	4.83275	1.35407e-06	G	ADD	8911	-0.0167524	0.0483376	-0.346572	0.728921	a	g	-0.095	0.0234	4.883e-05	-+	85.7	6.982	1	0.008231	14	22565439
autoRNFL_q4	14	24540710	rs758462461	GC	G	G	ADD	25398	-0.101443	0.0229108	-4.42776	9.56118e-06	G	ADD	8439	-0.0263929	0.0387755	-0.680661	0.496105	g	gc	-0.082	0.0197	3.206e-05	--	64	2.777	1	0.09564	14	24071501
autoRNFL_q4	14	51165441	rs6572688	A	G	G	ADD	26436	0.0463105	0.0100859	4.59159	4.41904e-06	G	ADD	8767	0.0113938	0.017503	0.65096	0.51509	a	g	-0.0376	0.0087	1.682e-05	--	66.5	2.988	1	0.08391	14	50698723
autoRNFL_q4	14	52764822	rs708490	A	T	A	ADD	26489	0.230151	0.050073	4.5963	4.3204e-06	A	ADD	8827	-0.0688517	0.0922393	-0.746446	0.455418	a	t	-0.1621	0.044	0.0002302	-+	87.7	8.116	1	0.004387	14	52298104
autoRNFL_q4	14	74536731	rs72725929	C	T	T	ADD	26825	-0.0755231	0.0133983	-5.63676	1.75018e-08	T	ADD	8907	-0.0134164	0.0231162	-0.580391	0.561666	t	c	-0.0599	0.0116	2.368e-07	--	81.5	5.403	1	0.0201	14	74070028
autoRNFL_q4	15	73608593	rs140870661	A	AAT	A	ADD	21354	0.0468924	0.00999281	4.69261	2.7141e-06	A	ADD	7079	-0.0331618	0.0176322	-1.88075	0.0600473	a	aat	-0.0274	0.0087	0.001604	-+	93.6	15.602	1	7.816e-05	15	73316252
autoRNFL_q4	16	5083209	rs35962888	G	A	A	ADD	26828	-0.0549609	0.0122411	-4.48986	7.15657e-06	A	ADD	8911	-0.0419526	0.0214081	-1.95966	0.0500665	a	g	-0.0518	0.0106	1.114e-06	--	0	0.278	1	0.5979	16	5033208
autoRNFL_q4	16	12550269	rs731764	A	G	G	ADD	26505	-0.0451193	0.00985505	-4.5783	4.70904e-06	G	ADD	8803	-0.0107795	0.0171747	-0.627639	0.530257	a	g	0.0366	0.0085	1.841e-05	++	66.7	3.008	1	0.08288	16	12456412
autoRNFL_q4	17	15844822	rs12453948	G	A	A	ADD	26323	0.0611002	0.0130602	4.67835	2.90629e-06	A	ADD	8781	0.00883993	0.0223539	0.395453	0.692518	a	g	0.0478	0.0113	2.246e-05	++	75.5	4.075	1	0.04353	17	15941508
autoRNFL_q4	17	68520189	rs80164883	A	C	C	ADD	26462	0.0742846	0.0166796	4.45363	8.47758e-06	C	ADD	8777	0.0326079	0.0286094	1.13977	0.254415	a	c	-0.0637	0.0144	9.8e-06	--	36.9	1.584	1	0.2082	17	70524048
autoRNFL_q4	18	13840895	rs4550522	C	T	T	ADD	26816	0.0986753	0.0216381	4.56026	5.13157e-06	T	ADD	8905	-0.0379863	0.038039	-0.998615	0.318008	t	c	0.0653	0.0188	0.0005203	+-	89.7	9.752	1	0.001791	18	13840896
autoRNFL_q4	19	16676625	19:16676625_CTTTTTTTTTTT_C	CTTTTTTTTTTT	C	C	ADD	25543	0.0668178	0.0149383	4.47292	7.74925e-06	C	ADD	8469	0.0185023	0.0258753	0.715057	0.474594	cttttttttttt	c	-0.0547	0.0129	2.324e-05	--	61.8	2.615	1	0.1059	19	16565814
autoRNFL_q4	19	38553206	rs4803708	T	C	C	ADD	26266	-0.0472706	0.00941292	-5.02188	5.15033e-07	C	ADD	8751	-0.0141673	0.0163106	-0.868593	0.385093	t	c	0.039	0.0082	1.721e-06	++	67.6	3.09	1	0.07878	19	38062566
autoRNFL_q4	19	58568000	rs4564698	G	T	G	ADD	26031	0.0425279	0.00895552	4.7488	2.05719e-06	G	ADD	8623	-0.00412882	0.0155468	-0.265574	0.790574	t	g	0.0309	0.0078	6.824e-05	+-	85.2	6.762	1	0.00931	19	58056632
autoRNFL_q4	20	6373187	rs355533	T	C	T	ADD	26787	0.0429118	0.00920356	4.66252	3.13867e-06	T	ADD	8900	0.0131161	0.016026	0.81843	0.413134	t	c	-0.0355	0.008	8.555e-06	--	61.5	2.599	1	0.1069	20	6392540
autoRNFL_q4	21	27959742	rs222987	T	G	T	ADD	26672	-0.086134	0.0185921	-4.63283	3.62413e-06	T	ADD	8848	0.0254682	0.0309013	0.824178	0.409861	t	g	0.0565	0.0159	0.0003929	+-	89.6	9.577	1	0.001971	21	26587423
trait	CHROM	POS	ID	REF	ALT	A1	TEST	OBS_CT	BETA	SE	T_STAT	P	A1.repl	TEST.repl	OBS_CT.repl	BETA.repl	SE.repl	T_STAT.repl	P.repl	Allele1	Allele2	Effect	StdErr	P-value	Direction	HetISq	HetChiSq	HetDf	HetPVal	CHROM_b38	POS_b38
autoRNFL_q6	1	150863650	rs116275309	G	A	A	ADD	26828	-0.105857	0.0223798	-4.73002	2.25635e-06	A	ADD	8911	0.0256153	0.0381978	0.670597	0.502495	a	g	-0.0723	0.0193	0.0001825	-+	88.7	8.819	1	0.002981	1	150891174
autoRNFL_q6	1	161386627	1:161386627_AT_A	AT	A	A	ADD	26629	-0.294555	0.0634464	-4.64258	3.45722e-06	A	ADD	8839	-0.246239	0.11852	-2.07761	0.0377738	a	at	-0.2838	0.0559	3.905e-07	--	0	0.129	1	0.7193	1	161416837
autoRNFL_q6	1	182581157	rs34085461	T	G	T	ADD	25525	0.0402107	0.00879405	4.57248	4.84237e-06	T	ADD	8500	0.0345201	0.0153426	2.24995	0.0244779	t	g	-0.0388	0.0076	3.659e-07	--	0	0.104	1	0.7476	1	182612022
autoRNFL_q6	1	195691297	rs146122313	T	G	G	ADD	26143	0.0451292	0.00974454	4.63123	3.65255e-06	G	ADD	8698	-0.00785328	0.0168755	-0.465367	0.64168	t	g	-0.0319	0.0084	0.0001582	-+	86.5	7.392	1	0.00655	1	195722167
autoRNFL_q6	1	235569262	rs79210243	A	G	G	ADD	26475	-0.215221	0.0467868	-4.60003	4.24383e-06	G	ADD	8806	-0.119025	0.0773223	-1.53934	0.123757	a	g	0.1894	0.04	2.217e-06	++	11.7	1.133	1	0.2871	1	235405947
autoRNFL_q6	1	240786805	rs377539541	CT	C	C	ADD	23552	0.115233	0.0248004	4.64644	3.39547e-06	C	ADD	7748	0.0165814	0.0433722	0.382306	0.702245	ct	c	-0.0909	0.0215	2.407e-05	--	74.4	3.899	1	0.04832	1	240623505
autoRNFL_q6	2	34814753	rs1220210	A	C	C	ADD	22367	0.0483137	0.0102593	4.70926	2.50111e-06	C	ADD	7426	0.0230934	0.0176434	1.3089	0.19061	a	c	-0.0419	0.0089	2.256e-06	--	34.5	1.527	1	0.2166	2	34589686
autoRNFL_q6	4	122121794	4:122121794_GCAAA_G	GCAAA	G	G	ADD	25164	0.046133	0.00930358	4.95863	7.14549e-07	G	ADD	8305	0.0232001	0.016127	1.43859	0.150305	g	gcaaa	0.0404	0.0081	5.331e-07	++	34.1	1.517	1	0.218	4	121200639
autoRNFL_q6	4	157893384	rs80094122	G	C	C	ADD	26651	-0.280387	0.061253	-4.57753	4.72625e-06	C	ADD	8861	-0.00840586	0.115416	-0.0728308	0.941942	c	g	-0.2206	0.0541	4.552e-05	--	76.9	4.333	1	0.03738	4	156972232
autoRNFL_q6	5	10594269	5:10594269_GTATT_G	GTATT	G	G	ADD	26582	-0.088363	0.017856	-4.94865	7.51851e-07	G	ADD	8833	0.00813754	0.0313245	0.259782	0.795038	g	gtatt	-0.0647	0.0155	3.039e-05	-+	86	7.163	1	0.007442	5	10594157
autoRNFL_q6	5	13166432	rs150538256	A	C	C	ADD	26727	-0.218176	0.0439714	-4.96178	7.02793e-07	C	ADD	8888	0.0910397	0.0716223	1.27111	0.203724	a	c	0.1335	0.0375	0.0003661	+-	92.6	13.537	1	0.0002339	5	13166320
autoRNFL_q6	5	56324960	rs11747549	T	G	G	ADD	26353	-0.103262	0.0230081	-4.48805	7.21814e-06	G	ADD	8763	0.0415809	0.0395406	1.0516	0.293012	t	g	0.0666	0.0199	0.0008074	+-	90	10.024	1	0.001545	5	57029133
autoRNFL_q6	5	107928024	rs113542655	G	GT	GT	ADD	24665	-0.0588403	0.0125448	-4.69042	2.74109e-06	GT	ADD	8196	0.0113925	0.0215386	0.528933	0.596866	g	gt	0.0411	0.0108	0.0001526	+-	87.4	7.939	1	0.004837	5	108592323
autoRNFL_q6	5	134921882	rs112571747	G	A	A	ADD	25961	0.113518	0.0253084	4.4854	7.3089e-06	A	ADD	8603	0.0171515	0.0422421	0.40603	0.684731	a	g	0.0881	0.0217	4.985e-05	++	73.9	3.83	1	0.05035	5	135586192
autoRNFL_q6	5	148870100	rs7701875	G	A	A	ADD	25969	-0.0466244	0.010127	-4.60396	4.16489e-06	A	ADD	8613	-0.00814847	0.0176891	-0.460648	0.645063	a	g	-0.0371	0.0088	2.396e-05	--	71.9	3.563	1	0.05907	5	149490537
autoRNFL_q6	5	177870627	rs11441050	A	AT	AT	ADD	26340	-0.0584354	0.0121036	-4.82793	1.38734e-06	AT	ADD	8753	-0.03075	0.0213206	-1.44226	0.149264	a	at	0.0517	0.0105	9.08e-07	++	21.6	1.275	1	0.2588	5	178443626
autoRNFL_q6	7	6853683	rs62441809	C	T	T	ADD	23417	-0.0622501	0.0118762	-5.24158	1.60591e-07	T	ADD	7732	-0.00459973	0.0208419	-0.220697	0.825335	t	c	-0.0481	0.0103	3.111e-06	--	82.7	5.776	1	0.01625	7	6814052
autoRNFL_q6	7	42193885	rs3801207	G	A	A	ADD	26389	0.0462039	0.00951153	4.85767	1.19457e-06	A	ADD	8752	0.0302714	0.0163624	1.85006	0.0643381	a	g	0.0422	0.0082	2.906e-07	++	0	0.709	1	0.3999	7	42154286
autoRNFL_q6	7	56761116	rs71550921	G	A	A	ADD	26752	0.0586554	0.013128	4.46797	7.92876e-06	A	ADD	8881	0.00198554	0.0229149	0.0866483	0.930953	a	g	0.0447	0.0114	8.859e-05	++	78.3	4.605	1	0.03188	7	56693423
autoRNFL_q6	7	71668541	rs55897432	C	T	T	ADD	25624	0.0720467	0.0157634	4.57051	4.88801e-06	T	ADD	8516	-0.0397166	0.0265554	-1.49561	0.134792	t	c	0.0429	0.0136	0.001541	+-	92.4	13.098	1	0.0002956	7	72203556
autoRNFL_q6	7	91135394	rs17163939	A	G	G	ADD	26650	-0.210622	0.046611	-4.51872	6.24806e-06	G	ADD	8842	0.0601601	0.0761677	0.789838	0.429644	a	g	0.1368	0.0398	0.0005774	+-	89.1	9.195	1	0.002427	7	91506079
autoRNFL_q6	8	109182244	rs7816434	T	C	C	ADD	26779	0.0543647	0.00986798	5.5092	3.63779e-08	C	ADD	8903	0.0219704	0.0171556	1.28065	0.200348	t	c	-0.0463	0.0086	6.16e-08	--	62.7	2.679	1	0.1017	8	108170015
autoRNFL_q6	8	139418421	rs200456463	C	T	T	ADD	25538	-0.0870299	0.0192192	-4.52827	5.9736e-06	T	ADD	8489	-0.0112393	0.0336438	-0.334066	0.738338	t	c	-0.0684	0.0167	4.174e-05	--	73.9	3.826	1	0.05046	8	138406178
autoRNFL_q6	9	103168023	rs10819772	A	G	G	ADD	26828	-0.0499926	0.010966	-4.55886	5.16585e-06	G	ADD	8911	0.00579516	0.0191011	0.303394	0.761597	a	g	0.0362	0.0095	0.0001432	+-	84.4	6.416	1	0.01131	9	100405741
autoRNFL_q6	9	123443776	rs1886337	G	C	G	ADD	26814	-0.0418863	0.0093636	-4.47331	7.7336e-06	G	ADD	8906	0.0168808	0.0164394	1.02685	0.30452	c	g	-0.0275	0.0081	0.0007281	-+	89.6	9.649	1	0.001895	9	120681498
autoRNFL_q6	10	70023053	rs10762198	A	G	A	ADD	26702	0.0862345	0.00977657	8.82053	1.20725e-18	A	ADD	8883	0.0923057	0.0170766	5.40541	6.63403e-08	a	g	-0.0877	0.0085	4.624e-25	--	0	0.095	1	0.7577	10	68263296
autoRNFL_q6	11	19845789	rs7110688	C	A	A	ADD	25616	0.0459336	0.00980615	4.68417	2.82544e-06	A	ADD	8494	0.00445857	0.0172615	0.258296	0.796185	a	c	0.0358	0.0085	2.664e-05	++	77.1	4.365	1	0.03669	11	19824243
autoRNFL_q6	11	134456288	rs73040345	C	T	T	ADD	26828	0.17623	0.0383103	4.60006	4.2429e-06	T	ADD	8911	0.0719568	0.0660218	1.08989	0.275789	t	c	0.15	0.0331	6.018e-06	++	46.4	1.866	1	0.1719	11	134586394
autoRNFL_q6	14	23034339	rs75551720	A	G	G	ADD	26828	0.127842	0.0267301	4.78271	1.73868e-06	G	ADD	8911	0.0231031	0.048507	0.476284	0.633884	a	g	-0.1034	0.0234	9.931e-06	--	72	3.576	1	0.05861	14	22565439
autoRNFL_q6	14	61025617	rs4442732	A	G	A	ADD	26703	0.0501687	0.00885538	5.66534	1.48247e-08	A	ADD	8871	0.044197	0.0155784	2.83708	0.00456317	a	g	-0.0487	0.0077	2.496e-10	--	0	0.111	1	0.7389	14	60558899
autoRNFL_q6	14	92643754	rs112300569	G	A	A	ADD	26615	-0.144013	0.0298872	-4.81854	1.45406e-06	A	ADD	8844	-0.0196086	0.0523773	-0.374372	0.708136	a	g	-0.1135	0.026	1.239e-05	--	76.5	4.256	1	0.03912	14	92177410
autoRNFL_q6	14	92787203	rs7160137	C	G	G	ADD	25849	-0.0841856	0.0184972	-4.55126	5.35678e-06	G	ADD	8617	0.00646955	0.0321775	0.201058	0.840658	c	g	0.0617	0.016	0.0001203	+-	83.2	5.966	1	0.01458	14	92320859
autoRNFL_q6	15	42659038	rs28557139	C	T	T	ADD	18103	-0.0643846	0.0128254	-5.02008	5.21393e-07	T	ADD	6061	-0.0057378	0.0221978	-0.258486	0.796041	t	c	-0.0497	0.0111	7.604e-06	--	80.9	5.233	1	0.02216	15	42366840
autoRNFL_q6	17	72957007	rs59170636	A	T	T	ADD	26655	-0.0543056	0.0117248	-4.63167	3.64435e-06	T	ADD	8852	-0.00892948	0.0205858	-0.433769	0.664467	a	t	0.0432	0.0102	2.242e-05	++	72.7	3.669	1	0.05545	17	74960912
autoRNFL_q6	17	73060073	rs11077773	T	C	C	ADD	26828	-0.0703223	0.01588	-4.42835	9.53307e-06	C	ADD	8911	-0.0104247	0.0273469	-0.381202	0.703062	t	c	0.0552	0.0137	5.796e-05	++	72.1	3.588	1	0.05821	17	75063978
autoRNFL_q6	17	79611271	rs62075722	A	G	A	ADD	26769	0.0409635	0.00897621	4.56356	5.05157e-06	A	ADD	8887	0.022731	0.0155534	1.46148	0.14392	a	g	-0.0364	0.0078	2.826e-06	--	3	1.031	1	0.31	17	81644245
autoRNFL_q6	18	3312475	rs9945183	T	C	C	ADD	26595	0.559888	0.120214	4.65744	3.21708e-06	C	ADD	8828	-0.0492528	0.176438	-0.27915	0.780136	t	c	-0.3668	0.0993	0.0002227	-+	87.7	8.14	1	0.004329	18	3312477
autoRNFL_q6	18	29660844	rs62093948	G	A	A	ADD	26597	0.181309	0.0402873	4.50039	6.81153e-06	A	ADD	8836	0.0131664	0.0688787	0.191154	0.848409	a	g	0.1384	0.0348	6.857e-05	++	77.5	4.44	1	0.0351	18	32080881
autoRNFL_q6	19	58566754	rs4801551	C	G	C	ADD	25651	0.046777	0.00904105	5.17385	2.31045e-07	C	ADD	8522	-0.00402762	0.015728	-0.25608	0.797895	c	g	-0.0342	0.0078	1.313e-05	-+	87.2	7.843	1	0.005103	19	58055386
autoRNFL_q6	20	11987393	rs6134430	A	G	G	ADD	26370	0.058069	0.0118111	4.91646	8.86526e-07	G	ADD	8770	0.0432171	0.0204561	2.11268	0.0346566	a	g	-0.0544	0.0102	1.072e-07	--	0	0.395	1	0.5295	20	12006745
autoRNFL_q6	20	52536425	rs6022851	C	T	T	ADD	25998	-0.0396557	0.00872061	-4.54735	5.45705e-06	T	ADD	8657	-0.00341674	0.0151418	-0.22565	0.821479	t	c	-0.0306	0.0076	5.053e-05	--	76.8	4.301	1	0.03809	20	53919886
trait	CHROM	POS	ID	REF	ALT	A1	TEST	OBS_CT	BETA	SE	T_STAT	P	A1.repl	TEST.repl	OBS_CT.repl	BETA.repl	SE.repl	T_STAT.repl	P.repl	Allele1	Allele2	Effect	StdErr	P-value	Direction	HetISq	HetChiSq	HetDf	HetPVal	CHROM_b38	POS_b38
autoRNFL_q7	1	14180711	rs114764995	G	A	A	ADD	26828	0.101619	0.0229943	4.41932	9.9398e-06	A	ADD	8911	0.0337246	0.0403833	0.835113	0.403677	a	g	0.085	0.02	2.104e-05	++	53.2	2.135	1	0.144	1	13854216
autoRNFL_q7	1	19469785	rs145965710	A	G	G	ADD	25976	-0.0568006	0.012033	-4.7204	2.36608e-06	G	ADD	8635	-0.0139831	0.0206978	-0.675585	0.499322	a	g	0.046	0.0104	9.851e-06	++	68.7	3.198	1	0.07371	1	19143291
autoRNFL_q7	1	85024287	1:85024287_TA_T	TA	T	T	ADD	24080	-0.113508	0.0236733	-4.79478	1.63827e-06	T	ADD	8037	-0.0493772	0.0403836	-1.2227	0.221478	t	ta	-0.0971	0.0204	1.987e-06	--	46.7	1.877	1	0.1707	1	84558604
autoRNFL_q7	1	241487633	rs376829153	C	A	A	ADD	26380	0.156026	0.0352867	4.42166	9.83349e-06	A	ADD	8751	-0.0218184	0.0629392	-0.346659	0.728856	a	c	0.1135	0.0308	0.0002266	+-	83.5	6.075	1	0.01371	1	241324333
autoRNFL_q7	2	130097291	rs11884965	C	A	A	ADD	26609	0.0448422	0.00979532	4.57793	4.71735e-06	A	ADD	8844	0.0111638	0.0168647	0.661962	0.508013	a	c	0.0363	0.0085	1.778e-05	++	66.5	2.982	1	0.0842	2	129339718
autoRNFL_q7	2	209593668	rs35972532	G	A	A	ADD	26571	-0.0875999	0.0195739	-4.47534	7.66062e-06	A	ADD	8827	0.0321599	0.0350731	0.91694	0.359199	a	g	-0.0592	0.0171	0.000538	-+	88.8	8.89	1	0.002867	2	208728944
autoRNFL_q7	3	21852490	rs59919518	G	A	G	ADD	22019	0.0488806	0.0108006	4.52572	6.05044e-06	G	ADD	7331	0.00813886	0.0186535	0.436318	0.662619	a	g	0.0387	0.0093	3.546e-05	++	72	3.573	1	0.05874	3	21810998
autoRNFL_q7	3	176758052	rs141721162	G	A	A	ADD	26058	0.087997	0.0191355	4.59864	4.27266e-06	A	ADD	8653	0.0481192	0.0334993	1.43643	0.150917	a	g	0.0782	0.0166	2.532e-06	++	6.4	1.068	1	0.3013	3	177040264
autoRNFL_q7	3	190582826	rs149441885	G	A	A	ADD	26179	-0.160228	0.0359263	-4.45993	8.23288e-06	A	ADD	8684	-0.0544259	0.0658365	-0.826683	0.40844	a	g	-0.136	0.0315	1.626e-05	--	49.7	1.99	1	0.1583	3	190865037
autoRNFL_q7	3	197077636	rs79049739	C	T	T	ADD	25917	0.0808795	0.0167274	4.83514	1.33813e-06	T	ADD	8600	0.00500642	0.0290419	0.172386	0.863138	t	c	0.062	0.0145	1.904e-05	++	80.5	5.125	1	0.02358	3	197350765
autoRNFL_q7	4	183655636	rs4241750	T	C	T	ADD	26527	0.0428271	0.00920355	4.65333	3.28194e-06	T	ADD	8808	-0.0132814	0.0158375	-0.838601	0.401716	t	c	-0.0287	0.008	0.0003158	-+	89.3	9.383	1	0.002191	4	182734483
autoRNFL_q7	6	56887545	6:56887545_CT_C	CT	C	C	ADD	24695	0.0454633	0.00955537	4.75788	1.96746e-06	C	ADD	8234	-0.0213431	0.0164535	-1.29718	0.194605	ct	c	-0.0286	0.0083	0.0005343	-+	91.9	12.328	1	0.0004462	6	57022747
autoRNFL_q7	6	108392867	rs117059929	T	C	C	ADD	26828	0.135462	0.0260349	5.2031	1.97437e-07	C	ADD	8911	-0.0345526	0.0449282	-0.769061	0.441877	t	c	-0.0927	0.0225	3.851e-05	-+	90.7	10.72	1	0.00106	6	108071663
autoRNFL_q7	8	99437556	rs570936450	G	GAC	GAC	ADD	26333	-0.488237	0.107078	-4.55963	5.14733e-06	GAC	ADD	8753	0.19155	0.208223	0.919924	0.357638	g	gac	0.3461	0.0952	0.0002789	+-	88.1	8.429	1	0.003692	8	98425328
autoRNFL_q7	9	139297921	rs11145903	A	G	G	ADD	24944	0.0410177	0.00892808	4.59423	4.36467e-06	G	ADD	8277	0.00289768	0.0155969	0.185786	0.852617	a	g	-0.0316	0.0077	4.513e-05	--	77.8	4.499	1	0.03391	9	136403469
autoRNFL_q7	14	90992556	rs80199126	A	G	G	ADD	26397	-0.143135	0.0288703	-4.95787	7.17126e-07	G	ADD	8786	-0.00919988	0.0488041	-0.188506	0.850484	a	g	0.1084	0.0248	1.282e-05	++	82.1	5.579	1	0.01818	14	90526212
autoRNFL_q7	15	49427127	rs112665115	A	G	G	ADD	26743	0.32617	0.0688456	4.73771	2.17256e-06	G	ADD	8875	-0.250025	0.141495	-1.76703	0.0772584	a	g	-0.2159	0.0619	0.0004883	-+	92.5	13.408	1	0.0002505	15	49134930
autoRNFL_q7	15	79353774	rs373503413	C	A	A	ADD	23564	-0.0567973	0.0125857	-4.51283	6.4277e-06	A	ADD	7887	-0.00371333	0.0218873	-0.169657	0.865284	a	c	-0.0436	0.0109	6.422e-05	--	77.4	4.421	1	0.03551	15	79061432
autoRNFL_q7	15	87389617	rs78959122	C	A	A	ADD	26806	0.349119	0.0743992	4.69252	2.71195e-06	A	ADD	8902	-0.184794	0.130585	-1.41513	0.157066	a	c	0.2183	0.0646	0.0007337	+-	92.1	12.62	1	0.0003816	15	86846386
autoRNFL_q7	15	92293742	rs111208033	G	A	A	ADD	25647	-0.0576234	0.0125232	-4.60134	4.21796e-06	A	ADD	8477	0.00547136	0.0218547	0.250352	0.802321	a	g	-0.042	0.0109	0.0001098	-+	84.1	6.275	1	0.01225	15	91750512
autoRNFL_q7	17	51433010	rs368185665	G	GATATCCTCATGGATATCCATGAGGA	GATATCCTCATGGATATCCATGAGGA	ADD	26062	-0.0788639	0.0177284	-4.44845	8.68498e-06	GATATCCTCATGGATATCCATGAGGA	ADD	8672	-0.00966513	0.0309847	-0.311932	0.7551	g	gatatcctcatggatatccatgagga	0.0618	0.0154	5.919e-05	++	73.4	3.758	1	0.05257	17	53355649
autoRNFL_q7	17	70687398	rs72843230	G	T	T	ADD	26369	-0.0767757	0.0165138	-4.64917	3.34884e-06	T	ADD	8760	0.0186358	0.0286346	0.650815	0.515183	t	g	-0.053	0.0143	0.0002137	-+	88	8.331	1	0.003896	17	72691259
autoRNFL_q7	19	5795195	19:5795195_AT_A	AT	A	A	ADD	26107	0.15007	0.0307715	4.87692	1.08387e-06	A	ADD	8652	0.117078	0.0526202	2.22497	0.0261093	a	at	0.1417	0.0266	9.656e-08	++	0	0.293	1	0.5883	19	5795184
autoRNFL_q7	19	17450721	19:17450721_ATT_A	ATT	A	A	ADD	25430	0.041215	0.00909516	4.53153	5.88257e-06	A	ADD	8443	0.0329797	0.0158784	2.07702	0.0378299	a	att	0.0392	0.0079	6.888e-07	++	0	0.203	1	0.6527	19	17339912
autoRNFL_q7	19	39602319	19:39602319_CCA_C	CCA	C	C	ADD	25212	0.151501	0.0324895	4.66309	3.1309e-06	C	ADD	8365	0.0886342	0.0538903	1.64472	0.100066	cca	c	-0.1347	0.0278	1.281e-06	--	0	0.998	1	0.3178	19	39111679
autoRNFL_q7	20	14554224	rs5840625	A	AT	A	ADD	26684	-0.0506616	0.00933989	-5.42421	5.87158e-08	A	ADD	8871	-0.0239016	0.0161366	-1.48121	0.138586	a	at	0.0439	0.0081	5.432e-08	++	51.5	2.06	1	0.1512	20	14573578
trait	CHROM	POS	ID	REF	ALT	A1	TEST	OBS_CT	BETA	SE	T_STAT	P	A1.repl	TEST.repl	OBS_CT.repl	BETA.repl	SE.repl	T_STAT.repl	P.repl	Allele1	Allele2	Effect	StdErr	P-value	Direction	HetISq	HetChiSq	HetDf	HetPVal	CHROM_b38	POS_b38
autoRNFL_q8	1	100650723	rs748914561	CTTTTTTTTT	C	C	ADD	25962	0.125779	0.0260607	4.82637	1.39836e-06	C	ADD	8625	0.076929	0.0467246	1.64643	0.0997109	cttttttttt	c	-0.1142	0.0228	5.246e-07	--					1	100185167
autoRNFL_q8	2	35058421	rs7559552	A	C	C	ADD	26828	0.0534817	0.012016	4.45086	8.58708e-06	C	ADD	8911	0.0196141	0.0213846	0.917207	0.359059	a	c	-0.0454	0.0105	1.494e-05	--					2	34833354
autoRNFL_q8	2	85935182	rs7603438	A	G	G	ADD	26666	0.0486909	0.0101963	4.77536	1.80341e-06	G	ADD	8857	-0.0121439	0.0183769	-0.660826	0.508741	a	g	-0.0344	0.0089	0.0001157	-+					2	85708059
autoRNFL_q8	2	112273107	rs138693397	C	T	T	ADD	26334	-0.0986289	0.02094	-4.71008	2.48885e-06	T	ADD	8725	-0.052918	0.0371457	-1.42461	0.154306	t	c	-0.0876	0.0182	1.566e-06	--					2	111515530
autoRNFL_q8	3	63380775	rs1996918	T	C	C	ADD	26267	0.052772	0.0106706	4.94557	7.63913e-07	C	ADD	8735	0.00229556	0.0189392	0.121207	0.90353	t	c	-0.0406	0.0093	1.253e-05	--					3	63395099
autoRNFL_q8	3	194759980	rs11711388	G	A	A	ADD	26351	-0.0793995	0.0179327	-4.42765	9.56497e-06	A	ADD	8766	-0.00560005	0.0316692	-0.176829	0.859647	a	g	-0.0615	0.0156	8.149e-05	--					3	195039251
autoRNFL_q8	5	6034845	rs40111	C	T	T	ADD	25967	0.0383097	0.00866258	4.42244	9.79897e-06	T	ADD	8632	0.00333414	0.0154517	0.215778	0.829166	t	c	0.0299	0.0076	7.398e-05	++					5	6034732
autoRNFL_q8	5	16642001	rs142344559	G	A	A	ADD	26634	-0.174211	0.0380437	-4.57923	4.68797e-06	A	ADD	8850	-0.0194761	0.0700596	-0.277994	0.781024	a	g	-0.139	0.0334	3.227e-05	--					5	16641892
autoRNFL_q8	5	173212127	rs791362	T	A	T	ADD	26523	-0.044344	0.00977017	-4.53871	5.6848e-06	T	ADD	8820	0.00524533	0.0171162	0.306455	0.759266	a	t	-0.0322	0.0085	0.0001508	-+					5	173785124
autoRNFL_q8	6	1493695	rs12663495	C	T	T	ADD	25156	-0.0428226	0.00934863	-4.58063	4.65799e-06	T	ADD	8366	0.0316902	0.0166683	1.90123	0.0573069	t	c	-0.025	0.0082	0.002176	-+					6	1493460
autoRNFL_q8	6	10207366	rs79647673	A	C	C	ADD	26787	0.113701	0.024452	4.64997	3.33571e-06	C	ADD	8902	0.00337432	0.0439032	0.0768583	0.938738	a	c	-0.0876	0.0214	4.135e-05	--					6	10207133
autoRNFL_q8	6	74032162	rs12205445	A	G	G	ADD	26772	-0.0890909	0.0193388	-4.60685	4.10692e-06	G	ADD	8892	-0.00499551	0.0327961	-0.15232	0.878938	a	g	0.0674	0.0167	5.217e-05	++					6	73322439
autoRNFL_q8	7	12195083	rs6963608	G	A	G	ADD	26597	-0.0379502	0.00858598	-4.42002	9.90837e-06	G	ADD	8841	0.0125243	0.0151991	0.824012	0.409955	a	g	-0.0257	0.0075	0.000575	-+					7	12155457
autoRNFL_q8	7	22122722	rs7788000	G	T	T	ADD	26117	-0.0447784	0.0100725	-4.44562	8.79986e-06	T	ADD	8676	0.00562972	0.0177517	0.317137	0.751147	t	g	-0.0325	0.0088	0.0002072	-+					7	22083104
autoRNFL_q8	7	49377090	rs79690659	C	T	T	ADD	26828	-0.16601	0.0371178	-4.47253	7.76184e-06	T	ADD	8911	-0.121762	0.0653639	-1.86283	0.062519	t	c	-0.1552	0.0323	1.516e-06	--					7	49337494
autoRNFL_q8	8	109194436	8:109194436_TGAGAG_T	TGAGAG	T	T	ADD	26350	-0.0399069	0.00865201	-4.61244	3.9984e-06	T	ADD	8743	-0.0293691	0.0152483	-1.92605	0.0541302	t	tgagag	-0.0373	0.0075	6.971e-07	--					8	108182207
autoRNFL_q8	9	17885913	rs10810860	C	A	A	ADD	26583	0.0502109	0.0111002	4.52342	6.11118e-06	A	ADD	8832	-0.00470251	0.0195291	-0.240795	0.809719	a	c	0.0368	0.0097	0.000137	+-					9	17885915
autoRNFL_q8	9	136566576	rs148519627	C	T	T	ADD	25887	0.112937	0.0240125	4.70327	2.57353e-06	T	ADD	8599	-0.00165474	0.0423399	-0.0390822	0.968826	t	c	0.085	0.0209	4.664e-05	+-					9	133701454
autoRNFL_q8	10	27537036	10:27537036_GTAACTTAGTGCACTGATA_G	GTAACTTAGTGCACTGATA	G	G	ADD	25282	0.0878699	0.0195085	4.5042	6.69225e-06	G	ADD	8435	0.00422275	0.0355899	0.11865	0.905555	g	gtaacttagtgcactgata	0.0685	0.0171	6.156e-05	++					10	27248107
autoRNFL_q8	10	70051928	rs10823171	A	G	A	ADD	26802	-0.0565744	0.0110415	-5.12382	3.0149e-07	A	ADD	8902	-0.052639	0.0195584	-2.69137	0.00712915	a	g	0.0556	0.0096	7.252e-09	++					10	68292171
autoRNFL_q8	11	22902972	rs180949840	G	A	A	ADD	26672	-0.20699	0.045736	-4.52575	6.04411e-06	A	ADD	8866	0.108014	0.0843944	1.27987	0.200625	a	g	-0.1355	0.0402	0.0007538	-+					11	22881426
autoRNFL_q8	11	69715453	rs60617331	T	C	C	ADD	26484	-0.165333	0.0356113	-4.64271	3.45525e-06	C	ADD	8800	-0.016892	0.0649796	-0.259958	0.794902	t	c	0.131	0.0312	2.713e-05	++					11	69900694
autoRNFL_q8	14	61072875	rs10483727	T	C	T	ADD	26828	-0.0393378	0.0087578	-4.49175	7.09362e-06	T	ADD	8911	-0.0487094	0.0156361	-3.11518	0.00184416	t	c	0.0416	0.0076	5.292e-08	++					14	60606157
autoRNFL_q8	14	84895664	rs373026958	CT	C	C	ADD	23088	0.0764248	0.0171055	4.46784	7.93894e-06	C	ADD	7673	0.0123015	0.0299819	0.410299	0.681598	ct	c	-0.0607	0.0149	4.427e-05	--					14	84429320
autoRNFL_q8	16	9211739	rs8052104	A	G	G	ADD	26828	0.117193	0.0257364	4.55358	5.29713e-06	G	ADD	8911	0.0385302	0.0459123	0.839215	0.401371	a	g	-0.0984	0.0224	1.174e-05	--					16	9117882
autoRNFL_q8	18	24069950	rs77593929	G	A	A	ADD	26405	0.1003	0.0221337	4.53155	5.88103e-06	A	ADD	8803	-0.0366297	0.0403914	-0.90687	0.364501	a	g	0.0687	0.0194	0.0004029	+-					18	26489986
autoRNFL_q8	19	15773072	19:15773072_TTC_T	TTC	T	T	ADD	26097	0.0401982	0.00884174	4.54641	5.4814e-06	T	ADD	8670	-0.00829316	0.0157011	-0.528189	0.597382	t	ttc	0.0285	0.0077	0.0002136	+-					19	15662262
trait	CHROM	POS	ID	REF	ALT	A1	TEST	OBS_CT	BETA	SE	T_STAT	P	A1.repl	TEST.repl	OBS_CT.repl	BETA.repl	SE.repl	T_STAT.repl	P.repl	Allele1	Allele2	Effect	StdErr	P-value	Direction	HetISq	HetChiSq	HetDf	HetPVal	CHROM_b38	POS_b38
mocoGCC_q3	1	82382517	rs3790904	G	T	T	ADD	26488	0.0418125	0.00891232	4.69154	2.72505e-06	T	ADD	8812	0.0146653	0.015451	0.949154	0.342568	t	g	0.035	0.0077	5.674e-06	++	56.8	2.316	1	0.128	1	81916833
mocoGCC_q3	1	96885027	rs17459990	C	G	G	ADD	26725	-0.0886902	0.0197369	-4.49362	7.0317e-06	G	ADD	8881	-0.043463	0.0336512	-1.29157	0.196538	c	g	0.0771	0.017	5.911e-06	++	25.6	1.344	1	0.2463	1	96419471
mocoGCC_q3	1	145590192	rs11587364	C	T	T	ADD	26060	0.0573448	0.012689	4.51924	6.23357e-06	T	ADD	8635	0.00961729	0.0218945	0.439257	0.660487	t	c	0.0453	0.011	3.623e-05	++	71.9	3.557	1	0.05929	1	145844874
mocoGCC_q3	1	206749523	rs117747787	C	T	T	ADD	26793	-0.19941	0.0412924	-4.82923	1.37816e-06	T	ADD	8898	0.166097	0.0747388	2.22237	0.0262835	t	c	-0.1139	0.0361	0.00162	-+	94.5	18.323	1	1.864e-05	1	206576196
mocoGCC_q3	1	220667770	rs3849284	G	C	C	ADD	26747	0.106412	0.0234188	4.54388	5.5469e-06	C	ADD	8893	-0.0839961	0.0409907	-2.04915	0.0404767	c	g	0.0596	0.0203	0.003402	+-	93.9	16.268	1	5.5e-05	1	220494428
mocoGCC_q3	2	59103234	rs12996396	C	T	T	ADD	26296	0.0484475	0.0107444	4.50911	6.53806e-06	T	ADD	8739	0.00455486	0.0185291	0.245822	0.805826	t	c	0.0374	0.0093	5.721e-05	++	76.2	4.199	1	0.04044	2	58876099
mocoGCC_q3	2	162847998	rs13401660	G	C	C	ADD	19281	-0.0726354	0.0159736	-4.54722	5.46895e-06	C	ADD	6390	-0.0180776	0.0278199	-0.64981	0.515838	c	g	-0.0591	0.0139	1.981e-05	--	65.4	2.892	1	0.089	2	161991488
mocoGCC_q3	2	196991342	rs75828753	C	T	T	ADD	26645	0.0905632	0.019854	4.56145	5.10279e-06	T	ADD	8860	-0.0306254	0.0347837	-0.880454	0.378638	t	c	0.0608	0.0172	0.0004233	+-	89.1	9.156	1	0.002479	2	196126618
mocoGCC_q3	2	213766676	rs17274552	C	T	T	ADD	26613	0.0844477	0.0190257	4.43862	9.09025e-06	T	ADD	8833	0.0370712	0.0330773	1.12075	0.262427	t	c	0.0727	0.0165	1.051e-05	++	35.1	1.541	1	0.2144	2	212901952
mocoGCC_q3	3	69411861	rs58167923	C	A	A	ADD	26590	0.56534	0.117705	4.80304	1.57124e-06	A	ADD	8833	0.332921	0.195394	1.70385	0.0884452	a	c	0.5035	0.1008	5.933e-07	++	3.7	1.038	1	0.3083	3	69362710
mocoGCC_q3	3	74268314	rs35990	G	A	A	ADD	26623	-0.038736	0.00856569	-4.52223	6.14548e-06	A	ADD	8851	2.54079e-05	0.0149924	0.00169472	0.998648	a	g	-0.0292	0.0074	8.647e-05	-+	80.2	5.039	1	0.02478	3	74219163
mocoGCC_q3	3	108987810	rs1163395	A	T	T	ADD	25981	0.042016	0.00899009	4.67359	2.97463e-06	T	ADD	8638	-0.0140761	0.015575	-0.903765	0.366145	a	t	-0.028	0.0078	0.0003233	-+	89.7	9.729	1	0.001814	3	109268963
mocoGCC_q3	3	188478227	rs9844848	T	C	C	ADD	20292	0.0504075	0.0102946	4.89649	9.83129e-07	C	ADD	6675	-2.98723e-05	0.0180564	-0.00165439	0.99868	t	c	-0.038	0.0089	2.11e-05	-+	83	5.889	1	0.01524	3	188760439
mocoGCC_q3	4	14301009	rs183376	A	C	C	ADD	26643	0.0960119	0.0203969	4.70719	2.52418e-06	C	ADD	8851	-0.0205954	0.0354836	-0.58042	0.561646	a	c	-0.0671	0.0177	0.0001496	-+	87.7	8.117	1	0.004385	4	14299385
mocoGCC_q3	4	182620007	rs72702410	A	G	G	ADD	26710	-0.121093	0.0260768	-4.64369	3.43874e-06	G	ADD	8868	-0.0216641	0.0449044	-0.48245	0.629498	a	g	0.096	0.0226	2.063e-05	++	72.7	3.666	1	0.05552	4	181698854
mocoGCC_q3	5	7435197	rs6886213	C	T	T	ADD	25750	0.0447993	0.00917838	4.88096	1.062e-06	T	ADD	8548	0.00244934	0.0160373	0.152727	0.878617	t	c	0.0344	0.008	1.617e-05	++	81	5.253	1	0.02191	5	7435084
mocoGCC_q3	5	27804039	rs114813360	T	C	C	ADD	26028	-0.131218	0.0287946	-4.55705	5.21139e-06	C	ADD	8663	0.0368822	0.0516043	0.714712	0.474806	t	c	0.0913	0.0251	0.0002821	+-	87.6	8.092	1	0.004447	5	27803932
mocoGCC_q3	7	18446807	rs10486295	G	A	A	ADD	26807	-0.203643	0.0403869	-5.0423	4.62974e-07	A	ADD	8898	-0.0718658	0.0763701	-0.941021	0.34672	a	g	-0.1748	0.0357	9.716e-07	--	57	2.327	1	0.1272	7	18407184
mocoGCC_q3	7	19268991	rs55920288	A	G	G	ADD	26712	-0.176662	0.0399223	-4.42515	9.67561e-06	G	ADD	8877	-0.0233769	0.0736912	-0.317228	0.751078	a	g	0.1419	0.0351	5.3e-05	++	70.1	3.345	1	0.06741	7	19229368
mocoGCC_q3	7	134581426	rs71532821	C	T	T	ADD	26783	0.0914977	0.0206556	4.42967	9.47501e-06	T	ADD	8900	0.0168807	0.0355786	0.474463	0.635182	t	c	0.0727	0.0179	4.72e-05	++	69.6	3.29	1	0.06972	7	134896675
mocoGCC_q3	9	17654463	rs118157774	G	T	T	ADD	26652	-0.132953	0.0291661	-4.55848	5.17545e-06	T	ADD	8843	-0.132532	0.0508851	-2.60453	0.00921537	t	g	-0.1328	0.0253	1.52e-07	--	0	0	1	0.9943	9	17654465
mocoGCC_q3	9	71847192	rs7031957	C	A	C	ADD	26828	0.0526095	0.00899329	5.84986	4.97688e-09	C	ADD	8911	-0.0111207	0.0156828	-0.709101	0.478281	a	c	0.0368	0.0078	2.336e-06	+-	92	12.427	1	0.0004232	9	69232276
mocoGCC_q3	9	89305881	rs143785564	C	T	T	ADD	26402	0.155067	0.0328227	4.72439	2.31997e-06	T	ADD	8784	0.0506282	0.0597805	0.846903	0.397073	t	c	0.1309	0.0288	5.394e-06	++	57.4	2.345	1	0.1257	9	86690966
mocoGCC_q3	10	70009389	rs4746749	C	T	C	ADD	26660	-0.0555125	0.0100643	-5.5158	3.50428e-08	C	ADD	8851	-0.0759735	0.017569	-4.3243	1.54697e-05	t	c	-0.0606	0.0087	4.046e-12	--	2.1	1.021	1	0.3122	10	68249632
mocoGCC_q3	11	96587820	rs145039567	C	T	T	ADD	26746	0.285118	0.0637298	4.47385	7.71403e-06	T	ADD	8878	0.128524	0.122495	1.04922	0.294107	t	c	0.2518	0.0565	8.464e-06	++	22.2	1.286	1	0.2568	11	96716820
mocoGCC_q3	11	117572288	rs7101613	A	G	G	ADD	26052	0.0573533	0.0126758	4.52463	6.07683e-06	G	ADD	8655	-0.0151237	0.022654	-0.667594	0.504411	a	g	-0.0401	0.0111	0.0002917	-+	87.2	7.795	1	0.005239	11	117701573
mocoGCC_q3	12	90277619	rs35184336	G	GCA	GCA	ADD	22697	-0.0569092	0.0125832	-4.52262	6.1389e-06	GCA	ADD	7591	-0.0124398	0.0221115	-0.562597	0.573726	g	gca	0.046	0.0109	2.565e-05	++	67.3	3.055	1	0.08048	12	89883842
mocoGCC_q3	13	63628866	rs9317283	C	T	T	ADD	26689	0.0584178	0.0126937	4.60211	4.20158e-06	T	ADD	8863	0.0228326	0.0223448	1.02183	0.306889	t	c	0.0497	0.011	6.599e-06	++	47.8	1.917	1	0.1661	13	63054733
mocoGCC_q3	14	60845983	rs1254275	A	C	C	ADD	26793	-0.0449332	0.00939055	-4.78494	1.71953e-06	C	ADD	8888	-0.000393933	0.0163184	-0.0241404	0.980741	a	c	0.0339	0.0081	3.192e-05	++	82.1	5.596	1	0.018	14	60379265
mocoGCC_q3	14	61324754	rs12434584	C	T	T	ADD	26706	0.043987	0.00892958	4.92598	8.44389e-07	T	ADD	8862	0.00200145	0.0154409	0.12962	0.89687	t	c	0.0335	0.0077	1.497e-05	++	82	5.541	1	0.01858	14	60858036
mocoGCC_q3	14	95828984	rs17784096	C	T	T	ADD	26270	0.0411988	0.00885963	4.65018	3.33263e-06	T	ADD	8724	0.00412112	0.0153802	0.26795	0.788745	t	c	0.032	0.0077	3.138e-05	++	77.1	4.364	1	0.03671	14	95362647
mocoGCC_q3	15	50193553	rs2009833	G	A	A	ADD	23737	0.0456193	0.0095364	4.7837	1.73129e-06	A	ADD	7954	-0.00951276	0.0165919	-0.573337	0.566433	a	g	0.0319	0.0083	0.0001126	+-	88	8.299	1	0.003966	15	49901356
mocoGCC_q3	17	79614932	17:79614932_TTAAC_T	TTAAC	T	TTAAC	ADD	26641	-0.0475984	0.00894572	-5.3208	1.04146e-07	TTAAC	ADD	8853	-0.0356728	0.015626	-2.28292	0.0224585	t	ttaac	-0.0447	0.0078	8.826e-09	--	0	0.439	1	0.5078	17	81647906
mocoGCC_q3	19	22730452	rs73924266	C	T	T	ADD	23943	-0.0849923	0.0177113	-4.79877	1.60608e-06	T	ADD	7931	0.0464065	0.0321215	1.44472	0.148577	t	c	-0.0544	0.0155	0.0004571	-+	92.2	12.832	1	0.0003407	19	22547650
mocoGCC_q3	21	40890301	rs8126599	C	G	G	ADD	25503	-0.156592	0.0353543	-4.42921	9.49702e-06	G	ADD	8468	0.0699141	0.0610446	1.1453	0.252119	c	g	0.0997	0.0306	0.001119	+-	90.3	10.31	1	0.001323	21	39518374
mocoGCC_q3	22	42220719	rs8138849	T	G	G	ADD	26757	0.0554903	0.0122474	4.53079	5.90173e-06	G	ADD	8895	-0.0111328	0.0212482	-0.523944	0.60033	t	g	-0.0389	0.0106	0.0002486	-+	86.4	7.379	1	0.006597	22	41824715
trait	CHROM	POS	ID	REF	ALT	A1	TEST	OBS_CT	BETA	SE	T_STAT	P	A1.repl	TEST.repl	OBS_CT.repl	BETA.repl	SE.repl	T_STAT.repl	P.repl	Allele1	Allele2	Effect	StdErr	P-value	Direction	HetISq	HetChiSq	HetDf	HetPVal	CHROM_b38	POS_b38
mocoGCC_q8	1	20140340	rs3767216	A	G	G	ADD	26828	0.0454508	0.00914235	4.97146	6.68593e-07	G	ADD	8911	0.0433386	0.0159597	2.7155	0.00663038	a	g	-0.0449	0.0079	1.482e-08	--	0	0.013	1	0.9086	1	19813847
mocoGCC_q8	1	243265174	rs151175848	A	T	T	ADD	24878	0.0683429	0.0140208	4.87439	1.09816e-06	T	ADD	8257	-0.0374346	0.0241119	-1.55254	0.120572	a	t	-0.0416	0.0121	0.0005962	-+	93	14.382	1	0.0001492	1	243101872
mocoGCC_q8	2	23801620	rs6544966	C	T	C	ADD	26340	-0.040383	0.00872807	-4.62679	3.73141e-06	C	ADD	8751	0.000523601	0.0149746	0.0349659	0.972108	t	c	-0.03	0.0075	6.899e-05	-+	82	5.57	1	0.01827	2	23578750
mocoGCC_q8	2	128235305	rs62160297	T	C	C	ADD	26504	-0.118536	0.0265484	-4.4649	8.04375e-06	C	ADD	8812	0.0274022	0.0464414	0.590037	0.555181	t	c	0.0826	0.023	0.0003391	+-	86.6	7.443	1	0.00637	2	127477729
mocoGCC_q8	3	172671913	rs9857777	C	T	T	ADD	26649	-0.0722523	0.0161508	-4.47362	7.72258e-06	T	ADD	8850	-0.0280935	0.0282658	-0.993905	0.320296	t	c	-0.0614	0.014	1.201e-05	--	45.7	1.84	1	0.175	3	172954123
mocoGCC_q8	3	194067377	rs7613721	C	A	A	ADD	24906	0.0436607	0.00983862	4.43769	9.13206e-06	A	ADD	8330	-0.0279773	0.0168226	-1.66308	0.0963348	a	c	0.0254	0.0085	0.00278	+-	92.6	13.512	1	0.000237	3	194346648
mocoGCC_q8	4	4362754	rs11728835	C	A	A	ADD	26828	-0.111003	0.0208489	-5.32418	1.02227e-07	A	ADD	8911	-0.0364287	0.0363028	-1.00347	0.315662	a	c	-0.0925	0.0181	3.11e-07	--	68.5	3.173	1	0.07485	4	4361027
mocoGCC_q8	4	5065066	rs62291621	A	G	G	ADD	26401	-0.0478744	0.00994426	-4.81427	1.48555e-06	G	ADD	8749	-0.00678091	0.0172838	-0.392328	0.694825	a	g	0.0377	0.0086	1.251e-05	++	76.5	4.247	1	0.03932	4	5063339
mocoGCC_q8	4	142011525	rs72933038	T	A	A	ADD	26797	-0.0584069	0.0131785	-4.43198	9.3743e-06	A	ADD	8893	-0.00149288	0.0230417	-0.0647903	0.948342	a	t	-0.0444	0.0114	0.0001047	--	78.2	4.597	1	0.03202	4	141090371
mocoGCC_q8	4	150517926	rs72726146	C	T	T	ADD	26765	0.116654	0.0255648	4.56307	5.06346e-06	T	ADD	8886	-0.0439406	0.0453484	-0.968957	0.332593	t	c	0.0779	0.0223	0.0004668	+-	89.5	9.517	1	0.002036	4	149596774
mocoGCC_q8	4	151454015	rs952225	C	T	C	ADD	26779	0.0422006	0.00901763	4.67978	2.88584e-06	C	ADD	8898	-0.0137108	0.0155621	-0.881039	0.378321	t	c	0.0281	0.0078	0.0003093	+-	89.7	9.663	1	0.00188	4	150532863
mocoGCC_q8	5	126942773	rs10478774	C	T	C	ADD	26298	0.0393487	0.00866596	4.54061	5.6341e-06	C	ADD	8725	-0.00788297	0.0150502	-0.523778	0.600447	t	c	0.0276	0.0075	0.0002392	+-	86.5	7.396	1	0.006535	5	127607081
mocoGCC_q8	6	121506208	rs766775218	A	ATTA	ATTA	ADD	25434	-0.116868	0.0244623	-4.77748	1.78498e-06	ATTA	ADD	8428	0.034791	0.0411869	0.84471	0.398297	a	atta	0.0773	0.021	0.0002367	+-	90	10.023	1	0.001546	6	121185062
mocoGCC_q8	7	45686816	rs78680195	C	G	G	ADD	25331	0.0984408	0.0189171	5.20379	1.96786e-07	G	ADD	8449	-0.0335307	0.0325152	-1.03123	0.302462	c	g	-0.0651	0.0164	6.91e-05	-+	91.9	12.308	1	0.0004511	7	45647217
mocoGCC_q8	7	100714678	rs34376878	C	CAAA	C	ADD	22672	-0.0439626	0.00994944	-4.4186	9.98008e-06	C	ADD	7550	-0.0151818	0.0174848	-0.868284	0.385267	caaa	c	-0.0369	0.0086	1.956e-05	--	51.1	2.047	1	0.1525	7	101071397
mocoGCC_q8	7	103687969	rs981973	C	A	A	ADD	26737	0.148322	0.0331782	4.47046	7.8373e-06	A	ADD	8882	-0.0256818	0.0562144	-0.456854	0.647787	a	c	0.1034	0.0286	0.0002972	+-	85.9	7.106	1	0.007683	7	104047522
mocoGCC_q8	7	129971231	rs73152836	G	A	A	ADD	26828	0.0773932	0.016975	4.55925	5.15641e-06	A	ADD	8911	-0.0357957	0.0291517	-1.22791	0.219513	a	g	0.0487	0.0147	0.0008935	+-	91.1	11.258	1	0.0007926	7	130331391
mocoGCC_q8	8	97054579	8:97054579_CTT_C	CTT	C	C	ADD	26120	-0.0702492	0.015721	-4.46849	7.91046e-06	C	ADD	8645	0.0183546	0.0267805	0.685372	0.493127	ctt	c	0.0475	0.0136	0.0004539	+-	87.7	8.141	1	0.004328	8	96042351
mocoGCC_q8	11	118824917	rs11217102	G	A	A	ADD	26285	0.0541521	0.0112477	4.81453	1.48369e-06	A	ADD	8735	0.00653867	0.0195451	0.334542	0.737979	a	g	0.0423	0.0097	1.427e-05	++	77.6	4.458	1	0.03474	11	118954207
mocoGCC_q8	12	118031741	rs10774937	C	G	G	ADD	26691	-0.0526812	0.0110068	-4.78624	1.70843e-06	G	ADD	8876	-0.00281115	0.0191446	-0.146838	0.883263	c	g	0.0403	0.0095	2.416e-05	++	80.4	5.1	1	0.02393	12	117593936
mocoGCC_q8	13	37440069	rs678037	C	T	T	ADD	26828	0.169777	0.0360015	4.71585	2.41919e-06	T	ADD	8911	0.0169191	0.0593772	0.284943	0.775695	t	c	0.1287	0.0308	2.912e-05	++	79.4	4.846	1	0.02771	13	36865932
mocoGCC_q8	14	54790746	rs112544605	G	A	A	ADD	23148	0.111896	0.0251845	4.44306	8.91001e-06	A	ADD	7741	-0.0477394	0.0440209	-1.08447	0.27819	a	g	0.0725	0.0219	0.0009066	+-	89.9	9.908	1	0.001646	14	54324028
mocoGCC_q8	14	65989482	rs150248570	C	G	G	ADD	26761	-0.115366	0.0259108	-4.45242	8.52494e-06	G	ADD	8877	0.0454347	0.045358	1.00169	0.31652	c	g	0.0758	0.0225	0.0007538	+-	89.4	9.476	1	0.002082	14	65522764
mocoGCC_q8	15	57931017	rs16977631	T	C	C	ADD	26828	0.0575356	0.0128486	4.47798	7.56635e-06	C	ADD	8911	0.00882137	0.0223294	0.395057	0.69281	t	c	-0.0454	0.0111	4.536e-05	--	72	3.576	1	0.05863	15	57638819
mocoGCC_q8	15	80051985	rs694831	G	A	A	ADD	26077	0.0425477	0.00961473	4.42526	9.67174e-06	A	ADD	8676	0.0220631	0.0165309	1.33466	0.182022	a	g	0.0374	0.0083	6.914e-06	++	12.8	1.147	1	0.2841	15	79759643
mocoGCC_q8	17	63353980	rs62064356	C	T	T	ADD	26521	-0.117957	0.0229455	-5.14077	2.75557e-07	T	ADD	8817	0.0728338	0.0407398	1.78778	0.073846	t	c	-0.072	0.02	0.000316	-+	94	16.65	1	4.495e-05	17	65357862
mocoGCC_q8	17	71842304	rs112389896	C	A	A	ADD	23640	-0.0593107	0.0124965	-4.74617	2.08516e-06	A	ADD	7859	-0.0299688	0.0219948	-1.36254	0.173067	a	c	-0.0522	0.0109	1.589e-06	--	25.7	1.345	1	0.2461	17	73846165
mocoGCC_q8	20	61047897	20:61047897_GGCATAAACCT_G	GGCATAAACCT	G	G	ADD	26084	0.0493724	0.0107824	4.57898	4.69401e-06	G	ADD	8661	0.00284533	0.0183776	0.154826	0.876962	g	ggcataaacct	0.0375	0.0093	5.631e-05	++	79	4.768	1	0.02899	20	62472841
mocoGCC_q8	22	19295688	rs117832423	T	C	C	ADD	26828	-0.105956	0.0234928	-4.51015	6.50572e-06	C	ADD	8911	-0.00139658	0.0410542	-0.034018	0.972864	t	c	0.0802	0.0204	8.444e-05	++	79.5	4.886	1	0.02707	22	19308165
mocoGCC_q8	22	22412026	rs5750443	T	C	C	ADD	26787	-0.155909	0.0341392	-4.56687	4.97259e-06	C	ADD	8898	0.0205796	0.0586584	0.350838	0.725718	t	c	0.1113	0.0295	0.0001629	+-	85.2	6.762	1	0.009311	22	22057613
trait	CHROM	POS	ID	REF	ALT	A1	TEST	OBS_CT	BETA	SE	T_STAT	P	A1.repl	TEST.repl	OBS_CT.repl	BETA.repl	SE.repl	T_STAT.repl	P.repl	Allele1	Allele2	Effect	StdErr	P-value	Direction	HetISq	HetChiSq	HetDf	HetPVal	CHROM_b38	POS_b38
mocoRNFL_q1	1	203326342	rs12145629	C	T	C	ADD	25471	-0.0402201	0.0089274	-4.50524	6.65913e-06	C	ADD	8449	-0.00623255	0.0155597	-0.400558	0.688756	t	c	-0.0318	0.0077	4.007e-05	--	72.1	3.59	1	0.05814	1	203357214
mocoRNFL_q1	1	239481427	rs6702543	G	A	G	ADD	26480	0.0441365	0.00945234	4.66937	3.03603e-06	G	ADD	8794	0.0148907	0.0162706	0.915194	0.360115	a	g	0.0368	0.0082	6.885e-06	++	58.6	2.416	1	0.1201	1	239318127
mocoRNFL_q1	2	6714096	2:6714096_CACAG_C	CACAG	C	C	ADD	23109	-0.120171	0.0248627	-4.83338	1.35098e-06	C	ADD	7628	0.0151732	0.0440895	0.344145	0.730747	cacag	c	0.0875	0.0217	5.321e-05	+-	86	7.15	1	0.007497	2	6573964
mocoRNFL_q1	2	172755683	2:172755683_TCCTCTG_T	TCCTCTG	T	TCCTCTG	ADD	26104	-0.0456348	0.00903113	-5.05306	4.37724e-07	TCCTCTG	ADD	8655	-0.0200468	0.0156403	-1.28173	0.19997	t	tcctctg	-0.0392	0.0078	5.252e-07	--	50.2	2.007	1	0.1565	2	171899173
mocoRNFL_q1	3	22840407	rs33115	G	A	A	ADD	26709	0.0480166	0.0105468	4.55274	5.31861e-06	A	ADD	8864	0.0196778	0.0183558	1.07202	0.283738	a	g	0.041	0.0091	7.409e-06	++	44.2	1.792	1	0.1807	3	22798916
mocoRNFL_q1	3	139271591	rs9826668	T	C	C	ADD	26281	-0.042981	0.00888329	-4.83841	1.31625e-06	C	ADD	8740	-0.00256379	0.0153521	-0.166999	0.867375	t	c	0.0328	0.0077	1.942e-05	++	80.7	5.192	1	0.02268	3	139552749
mocoRNFL_q1	4	81489383	rs34309642	A	AT	AT	ADD	26623	-0.078691	0.0171781	-4.5809	4.65079e-06	AT	ADD	8845	0.000385384	0.0289833	0.0132968	0.989391	a	at	0.0581	0.0148	8.356e-05	+-	81.8	5.509	1	0.01892	4	80568229
mocoRNFL_q1	4	122121794	4:122121794_GCAAA_G	GCAAA	G	G	ADD	25108	0.0481721	0.00930533	5.17683	2.27428e-07	G	ADD	8361	0.0309491	0.016037	1.92986	0.0536581	g	gcaaa	0.0438	0.008	5.146e-08	++	0	0.863	1	0.3529	4	121200639
mocoRNFL_q1	5	141325877	rs62380004	A	G	G	ADD	26828	-0.0643863	0.0145341	-4.43001	9.46001e-06	G	ADD	8911	0.00600639	0.0252567	0.237813	0.812031	a	g	0.0469	0.0126	0.0001984	+-	82.9	5.835	1	0.01571	5	141946312
mocoRNFL_q1	5	178287345	rs13157348	G	A	A	ADD	25851	-0.0397841	0.0087524	-4.5455	5.50533e-06	A	ADD	8591	-0.00610764	0.0151435	-0.403317	0.686725	a	g	-0.0314	0.0076	3.514e-05	--	73	3.707	1	0.05418	5	178860344
mocoRNFL_q1	6	55928494	rs115915178	C	T	T	ADD	26828	0.146255	0.0306553	4.77095	1.84327e-06	T	ADD	8911	-0.0336801	0.0527802	-0.638119	0.523413	t	c	0.1009	0.0265	0.0001418	+-	88.5	8.691	1	0.003199	6	56063696
mocoRNFL_q1	6	162344629	6:162344629_CTCTT_C	CTCTT	C	C	ADD	25433	-0.0433764	0.00958306	-4.52636	6.02793e-06	C	ADD	8438	-0.00616588	0.0165569	-0.372406	0.7096	ctctt	c	0.034	0.0083	4.06e-05	++	73.6	3.783	1	0.05176	6	161923597
mocoRNFL_q1	7	14259246	rs4584047	G	T	G	ADD	25916	-0.0435255	0.00885468	-4.91553	8.90823e-07	G	ADD	8608	0.0169889	0.0153059	1.10996	0.267048	t	g	-0.0284	0.0077	0.0002164	-+	91.5	11.712	1	0.0006211	7	14219621
mocoRNFL_q1	7	31241037	rs35526683	T	C	C	ADD	26706	0.114847	0.025944	4.42673	9.60499e-06	C	ADD	8868	0.0316745	0.0446517	0.709367	0.478115	t	c	-0.0939	0.0224	2.865e-05	--	61.4	2.594	1	0.1073	7	31201423
mocoRNFL_q1	7	137419430	rs7806517	T	C	T	ADD	26419	0.0773633	0.0166551	4.64503	3.41672e-06	T	ADD	8802	0.0142407	0.0286711	0.496692	0.619418	t	c	-0.0614	0.0144	1.99e-05	--	72.4	3.624	1	0.05695	7	137734684
mocoRNFL_q1	7	143095256	rs35251323	A	G	G	ADD	26828	-0.0407595	0.00877008	-4.64756	3.37475e-06	G	ADD	8911	-0.00987567	0.0152302	-0.648428	0.516725	a	g	0.0331	0.0076	1.354e-05	++	67.6	3.088	1	0.07887	7	143398163
mocoRNFL_q1	7	153885102	rs28445509	C	T	T	ADD	26629	0.169045	0.0366182	4.61643	3.92214e-06	T	ADD	8849	-0.0631898	0.0652164	-0.968926	0.332609	t	c	0.1134	0.0319	0.0003839	+-	89.6	9.641	1	0.001903	7	154188017
mocoRNFL_q1	9	96556240	rs13294117	T	G	G	ADD	24486	0.0751458	0.0168602	4.45698	8.34906e-06	G	ADD	8178	-0.00266701	0.0292236	-0.0912621	0.927287	t	g	-0.0557	0.0146	0.0001362	-+	81.2	5.319	1	0.02109	9	93793958
mocoRNFL_q1	10	70014140	rs10823166	T	C	C	ADD	26803	0.0686686	0.00976269	7.03378	2.05845e-12	C	ADD	8903	0.0651318	0.016904	3.85305	0.000117478	t	c	-0.0678	0.0085	1.075e-15	--	0	0.033	1	0.8562	10	68254383
mocoRNFL_q1	10	71583391	rs10762313	A	G	A	ADD	26493	0.0393102	0.00882479	4.45452	8.44255e-06	A	ADD	8805	-0.0198169	0.0152977	-1.29542	0.19521	a	g	-0.0245	0.0076	0.001322	-+	91.1	11.209	1	0.0008141	10	69823635
mocoRNFL_q1	10	75737383	rs4745726	T	C	C	ADD	25633	-0.054008	0.0110809	-4.87396	1.10035e-06	C	ADD	8488	0.00780183	0.0191943	0.406465	0.684411	t	c	0.0386	0.0096	5.873e-05	+-	87.1	7.778	1	0.00529	10	73977625
mocoRNFL_q1	10	83803502	rs74749789	T	A	A	ADD	21804	-0.059564	0.0129598	-4.59607	4.32955e-06	A	ADD	7214	0.00214005	0.0223098	0.0959241	0.923584	a	t	-0.044	0.0112	8.637e-05	-+	82.5	5.72	1	0.01678	10	82043746
mocoRNFL_q1	11	88897677	11:88897677_ATATATATATATATATG_A	ATATATATATATATATG	A	ATATATATATATATATG	ADD	25889	-0.0408994	0.00886228	-4.615	3.94987e-06	ATATATATATATATATG	ADD	8638	-0.0213175	0.01522	-1.40062	0.161364	a	atatatatatatatatg	-0.0359	0.0077	2.693e-06	--	19.1	1.236	1	0.2662	11	89164509
mocoRNFL_q1	12	31234781	rs61917209	G	A	A	ADD	23283	0.0557133	0.0125922	4.42442	9.71416e-06	A	ADD	7738	-0.0441658	0.0211767	-2.08559	0.0370488	a	g	0.0296	0.0108	0.006201	+-	93.9	16.434	1	5.037e-05	12	31081847
mocoRNFL_q1	12	105429772	rs142937682	G	A	A	ADD	25930	-0.0706774	0.0155419	-4.54753	5.45236e-06	A	ADD	8624	-0.0196314	0.0268482	-0.731197	0.464679	a	g	-0.0579	0.0135	1.693e-05	--	63.1	2.708	1	0.09987	12	105035994
mocoRNFL_q1	12	124844986	rs1263991	T	C	C	ADD	26828	-0.0504519	0.0109501	-4.60746	4.09499e-06	C	ADD	8911	-0.00723475	0.0190009	-0.380759	0.703391	t	c	0.0397	0.0095	2.888e-05	++	74.2	3.883	1	0.04876	12	124360440
mocoRNFL_q1	13	29884423	rs9508344	A	G	G	ADD	26734	0.0461934	0.0101503	4.55092	5.36465e-06	G	ADD	8876	-0.0255283	0.0177535	-1.43793	0.150489	a	g	-0.0285	0.0088	0.001208	-+	91.9	12.3	1	0.000453	13	29310286
mocoRNFL_q1	14	60808002	rs4436712	G	T	T	ADD	26055	0.0459764	0.00896495	5.12846	2.94209e-07	T	ADD	8668	0.0331675	0.0154953	2.14048	0.0323437	t	g	0.0428	0.0078	3.569e-08	++	0	0.512	1	0.4743	14	60341284
mocoRNFL_q1	14	74528952	rs62005115	G	C	C	ADD	26826	-0.0625937	0.0133366	-4.69336	2.7008e-06	C	ADD	8910	-0.0605373	0.0233157	-2.59642	0.00943552	c	g	-0.0621	0.0116	8.179e-08	--	0	0.006	1	0.939	14	74062249
mocoRNFL_q1	16	80537760	rs4635359	A	C	C	ADD	26628	-0.0437339	0.00977217	-4.47535	7.66013e-06	C	ADD	8855	-0.0522272	0.0169151	-3.0876	0.00202402	a	c	0.0459	0.0085	5.97e-08	++	0	0.189	1	0.6637	16	80503863
mocoRNFL_q1	20	53747629	20:53747629_CTTTTTTT_C	CTTTTTTT	C	CTTTTTTT	ADD	25566	-0.182623	0.0412241	-4.43001	9.462e-06	CTTTTTTT	ADD	8483	-0.0514466	0.0741866	-0.693476	0.48803	cttttttt	c	0.1517	0.036	2.563e-05	++	58.1	2.389	1	0.1222	20	55131090
trait	CHROM	POS	ID	REF	ALT	A1	TEST	OBS_CT	BETA	SE	T_STAT	P	A1.repl	TEST.repl	OBS_CT.repl	BETA.repl	SE.repl	T_STAT.repl	P.repl	Allele1	Allele2	Effect	StdErr	P-value	Direction	HetISq	HetChiSq	HetDf	HetPVal	CHROM_b38	POS_b38
mocoRNFL_q3	2	7468129	rs55746864	G	A	A	ADD	26828	0.1299	0.0290801	4.46697	7.96577e-06	A	ADD	8911	0.00217923	0.0518943	0.0419936	0.966505	a	g	0.0994	0.0254	8.952e-05	++	78.3	4.61	1	0.03179	2	7327998
mocoRNFL_q3	2	67891565	rs750275171	AAT	A	A	ADD	26444	-0.0479293	0.0104746	-4.57577	4.76619e-06	A	ADD	8776	0.0131931	0.0182658	0.722289	0.470136	a	aat	-0.0328	0.0091	0.0003061	-+	88.1	8.427	1	0.003698	2	67664433
mocoRNFL_q3	2	178635278	rs11374940	C	CT	CT	ADD	26412	-0.0461393	0.0103365	-4.46373	8.08786e-06	CT	ADD	8771	0.00985114	0.0180426	0.545993	0.585084	ct	c	-0.0323	0.009	0.0003161	-+	86.2	7.25	1	0.007088	2	177770550
mocoRNFL_q3	3	16144981	rs12491653	G	A	A	ADD	26828	-0.0704392	0.0137587	-5.11959	3.08308e-07	A	ADD	8911	-0.0237277	0.0243892	-0.972879	0.33064	a	g	-0.0592	0.012	7.932e-07	--	64.1	2.783	1	0.09529	3	16103474
mocoRNFL_q3	3	35456796	rs115287183	G	C	C	ADD	26828	-0.173743	0.0368546	-4.71429	2.43774e-06	C	ADD	8911	0.0122112	0.0629547	0.193968	0.846206	c	g	-0.1263	0.0318	7.175e-05	-+	84.6	6.498	1	0.0108	3	35415304
mocoRNFL_q3	3	190992084	rs79994592	A	C	C	ADD	26703	0.222711	0.0488855	4.55577	5.24241e-06	C	ADD	8875	-0.15689	0.0795167	-1.97305	0.0485214	a	c	-0.1186	0.0416	0.004404	-+	94	16.539	1	4.767e-05	3	191274295
mocoRNFL_q3	5	89354760	rs559997002	A	C	C	ADD	26803	0.207191	0.0457358	4.53016	5.9192e-06	C	ADD	8909	-0.0629814	0.0757377	-0.831572	0.405673	a	c	-0.135	0.0392	0.0005646	-+	89.3	9.325	1	0.002261	5	90058943
mocoRNFL_q3	6	30031345	rs1150739	T	C	C	ADD	26807	-0.0396445	0.0087165	-4.54822	5.43392e-06	C	ADD	8906	0.00199368	0.0153601	0.129796	0.896731	t	c	0.0295	0.0076	9.958e-05	+-	82	5.558	1	0.01839	6	30063568
mocoRNFL_q3	6	85825088	rs117293567	C	A	A	ADD	26373	-0.136722	0.0277474	-4.92739	8.38409e-07	A	ADD	8763	-0.0276994	0.0498654	-0.555483	0.578579	a	c	-0.1109	0.0242	4.745e-06	--	72.6	3.65	1	0.05607	6	85115370
mocoRNFL_q3	7	79655379	rs140671878	G	A	A	ADD	26735	0.0871897	0.0195852	4.4518	8.54967e-06	A	ADD	8885	-0.020826	0.0337961	-0.616225	0.537762	a	g	0.06	0.0169	0.0003959	+-	86.9	7.647	1	0.005687	7	80026063
mocoRNFL_q3	10	12748816	rs4750249	C	T	C	ADD	26392	0.0526459	0.0103903	5.06683	4.0722e-07	C	ADD	8760	0.0445873	0.0181483	2.45683	0.0140361	t	c	0.0507	0.009	1.933e-08	++	0	0.148	1	0.7	10	12706817
mocoRNFL_q3	10	34267776	10:34267776_GC_G	GC	G	G	ADD	26275	-0.184079	0.0364264	-5.05346	4.36788e-07	G	ADD	8745	-0.0031499	0.0658446	-0.0478384	0.961846	g	gc	-0.1417	0.0319	8.787e-06	--	82.7	5.781	1	0.0162	10	33978848
mocoRNFL_q3	13	30790381	rs61946921	T	C	C	ADD	26607	0.0532712	0.0114653	4.6463	3.39567e-06	C	ADD	8836	0.0199678	0.019769	1.01005	0.312497	t	c	-0.0449	0.0099	6.011e-06	--	52.9	2.124	1	0.145	13	30216244
mocoRNFL_q3	15	50095395	rs76477195	C	A	A	ADD	26770	-0.300101	0.0647228	-4.63671	3.55671e-06	A	ADD	8897	0.0659516	0.113457	0.581292	0.561059	a	c	-0.2102	0.0562	0.0001844	-+	87.3	7.854	1	0.005072	15	49803198
mocoRNFL_q3	16	77564395	rs62043885	G	A	A	ADD	26337	0.0429953	0.0097038	4.43077	9.42756e-06	A	ADD	8737	-0.00167186	0.017023	-0.0982117	0.921766	a	g	0.032	0.0084	0.0001443	+-	80.8	5.196	1	0.02263	16	77530498
mocoRNFL_q3	17	8747842	rs75949465	A	C	C	ADD	26809	0.424562	0.0950899	4.46484	8.04548e-06	C	ADD	8905	-0.0393529	0.169767	-0.231805	0.816694	a	c	-0.3138	0.083	0.0001555	-+	82.4	5.684	1	0.01712	17	8844525
mocoRNFL_q3	18	69260075	rs9959461	C	T	C	ADD	26596	0.0654631	0.0146509	4.46821	7.92033e-06	C	ADD	8822	-0.00721628	0.0254269	-0.283805	0.776567	t	c	0.0473	0.0127	0.0001916	+-	83.7	6.134	1	0.01326	18	71592839
mocoRNFL_q3	19	55473831	rs775841	A	G	G	ADD	24498	-0.0400014	0.0090389	-4.42548	9.66441e-06	G	ADD	8117	-0.00898156	0.0158089	-0.568132	0.569961	a	g	0.0324	0.0078	3.726e-05	++	65.5	2.902	1	0.08849	19	54962463
trait	CHROM	POS	ID	REF	ALT	A1	TEST	OBS_CT	BETA	SE	T_STAT	P	A1.repl	TEST.repl	OBS_CT.repl	BETA.repl	SE.repl	T_STAT.repl	P.repl	Allele1	Allele2	Effect	StdErr	P-value	Direction	HetISq	HetChiSq	HetDf	HetPVal	CHROM_b38	POS_b38
mocoRNFL_q5	1	25908195	rs10902660	G	A	A	ADD	24131	0.0537116	0.0119818	4.48275	7.40257e-06	A	ADD	8018	0.0173524	0.0210451	0.824533	0.409661	a	g	0.0448	0.0104	1.681e-05	++	55.6	2.254	1	0.1333	1	25581704
mocoRNFL_q5	1	82358327	rs72717791	G	A	A	ADD	26569	0.0490893	0.00995582	4.93071	8.24236e-07	A	ADD	8848	0.0198736	0.0171466	1.15904	0.246472	a	g	0.0417	0.0086	1.26e-06	++	53.9	2.171	1	0.1406	1	81892642
mocoRNFL_q5	1	175110955	rs2187958	C	A	A	ADD	26462	-0.0562457	0.0125784	-4.47161	7.79539e-06	A	ADD	8783	-0.0204093	0.02216	-0.920993	0.357079	a	c	-0.0475	0.0109	1.403e-05	--	49.4	1.978	1	0.1596	1	175141819
mocoRNFL_q5	1	198530490	1:198530490_GA_G	GA	G	G	ADD	26743	-0.0829268	0.0180569	-4.59252	4.39922e-06	G	ADD	8884	-0.0577755	0.0319401	-1.80887	0.0705046	g	ga	-0.0768	0.0157	1.018e-06	--	0	0.47	1	0.493	1	198561360
mocoRNFL_q5	1	203330201	rs6667874	C	G	G	ADD	24596	0.0458813	0.00950262	4.82828	1.38545e-06	G	ADD	8158	0.0008195	0.0167084	0.0490473	0.960883	c	g	-0.0349	0.0083	2.43e-05	--	81.8	5.496	1	0.01906	1	203361073
mocoRNFL_q5	2	30191362	rs13429914	C	T	T	ADD	26762	-0.186965	0.0416771	-4.48604	7.28627e-06	T	ADD	8890	0.0536374	0.0744219	0.72072	0.471101	t	c	-0.1295	0.0364	0.0003681	-+	87.4	7.957	1	0.004791	2	29968496
mocoRNFL_q5	2	182646715	rs75740624	C	T	T	ADD	26592	0.123946	0.027956	4.4336	9.30415e-06	T	ADD	8812	0.0265289	0.0482588	0.549722	0.582524	t	c	0.0995	0.0242	3.923e-05	++	67.2	3.051	1	0.08069	2	181781988
mocoRNFL_q5	3	34272620	rs111847899	C	CAAAT	CAAAT	ADD	26236	-0.0493989	0.00987056	-5.00467	5.6319e-07	CAAAT	ADD	8713	-0.0372023	0.0170509	-2.18183	0.0291484	caaat	c	-0.0463	0.0085	5.816e-08	--	0	0.383	1	0.5359	3	34231128
mocoRNFL_q5	4	6324785	rs3796398	T	C	C	ADD	26828	0.04114	0.00861264	4.7767	1.7914e-06	C	ADD	8911	0.0061389	0.0148861	0.412392	0.680062	t	c	-0.0324	0.0075	1.418e-05	--	75.9	4.142	1	0.04183	4	6323058
mocoRNFL_q5	4	24993167	rs4697518	A	G	G	ADD	25674	0.059122	0.0132336	4.46755	7.9457e-06	G	ADD	8504	0.0050061	0.02317	0.21606	0.828946	a	g	-0.0458	0.0115	6.704e-05	--	75.7	4.113	1	0.04255	4	24991545
mocoRNFL_q5	4	122121794	4:122121794_GCAAA_G	GCAAA	G	G	ADD	25108	-0.0465696	0.0093691	-4.97055	6.7202e-07	G	ADD	8361	-0.0260996	0.0162397	-1.60715	0.10806	g	gcaaa	-0.0415	0.0081	3.246e-07	--	16.1	1.192	1	0.2749	4	121200639
mocoRNFL_q5	6	10813319	rs564249534	T	A	A	ADD	26553	0.111875	0.0229198	4.88115	1.06082e-06	A	ADD	8823	-0.0750092	0.0397391	-1.88754	0.0591205	a	t	0.0652	0.0199	0.001019	+-	94	16.596	1	4.626e-05	6	10813086
mocoRNFL_q5	6	155468310	rs376478172	C	CT	C	ADD	20877	-0.0706186	0.0153771	-4.59244	4.40658e-06	C	ADD	6962	-0.0199464	0.0261518	-0.762719	0.445657	ct	c	-0.0576	0.0133	1.39e-05	--	64.2	2.79	1	0.09486	6	155147176
mocoRNFL_q5	6	161678741	rs73019329	T	C	C	ADD	26550	0.0555493	0.0119358	4.65401	3.27118e-06	C	ADD	8815	0.00109712	0.0208053	0.0527326	0.957946	t	c	-0.0421	0.0104	4.842e-05	--	80.6	5.154	1	0.0232	6	161257709
mocoRNFL_q5	7	80063	rs10279270	G	A	A	ADD	26739	0.604401	0.126583	4.77475	1.80884e-06	A	ADD	8885	-0.0907848	0.220801	-0.411162	0.680964	a	g	0.4324	0.1098	8.223e-05	+-	86.6	7.461	1	0.006306	7	80063
mocoRNFL_q5	7	9606823	rs77491454	C	T	T	ADD	26408	-0.149986	0.0330425	-4.53919	5.6721e-06	T	ADD	8759	-0.027572	0.0574756	-0.479717	0.631441	t	c	-0.1196	0.0286	2.989e-05	--	70.7	3.409	1	0.06483	7	9567193
mocoRNFL_q5	7	67340060	rs35909268	T	TG	TG	ADD	26466	0.08634	0.0190647	4.52878	5.95845e-06	TG	ADD	8818	0.0331846	0.0324219	1.02352	0.306089	t	tg	-0.0727	0.0164	9.748e-06	--	49.9	1.997	1	0.1576	7	67875073
mocoRNFL_q5	8	14238383	rs1841648	A	C	C	ADD	26620	-0.0790768	0.0168375	-4.69648	2.66009e-06	C	ADD	8839	-0.0165503	0.0302065	-0.547906	0.58377	a	c	0.0643	0.0147	1.248e-05	++	69.4	3.269	1	0.0706	8	14380874
mocoRNFL_q5	9	96506549	rs36075434	C	G	G	ADD	24570	-0.0980435	0.0213164	-4.59943	4.25759e-06	G	ADD	8200	0.0242399	0.0379795	0.638237	0.523337	c	g	0.0688	0.0186	0.0002169	+-	87.3	7.883	1	0.004989	9	93744267
mocoRNFL_q5	10	2959487	rs74875008	T	C	C	ADD	26609	-0.0654058	0.0145809	-4.48572	7.29721e-06	C	ADD	8834	-0.022232	0.0258433	-0.860259	0.389669	t	c	0.055	0.0127	1.494e-05	++	52.8	2.117	1	0.1457	10	2917295
mocoRNFL_q5	10	70041583	rs4745956	C	T	C	ADD	26723	-0.0504286	0.0101398	-4.97332	6.62248e-07	C	ADD	8876	-0.0480814	0.0176925	-2.71761	0.00658828	t	c	-0.0498	0.0088	1.46e-08	--	0	0.013	1	0.9084	10	68281826
mocoRNFL_q5	12	31218148	rs61917178	G	T	T	ADD	26537	-0.0569245	0.0104612	-5.4415	5.33026e-08	T	ADD	8808	0.00080079	0.0178473	0.044869	0.964213	t	g	-0.0422	0.009	2.986e-06	-+	87.2	7.786	1	0.005265	12	31065214
mocoRNFL_q5	12	118010985	rs11068546	T	A	A	ADD	26076	0.0679759	0.014888	4.56581	4.99831e-06	A	ADD	8663	0.00176591	0.0256391	0.0688756	0.94509	a	t	0.0513	0.0129	6.805e-05	++	79.9	4.987	1	0.02554	12	117573180
mocoRNFL_q5	13	34736535	rs12584168	G	A	A	ADD	25974	0.0620612	0.0123554	5.02301	5.12053e-07	A	ADD	8643	0.0253125	0.0212665	1.19025	0.233979	a	g	0.0528	0.0107	7.767e-07	++	55.2	2.232	1	0.1351	13	34162398
mocoRNFL_q5	13	101332365	13:101332365_CA_C	CA	C	CA	ADD	23210	0.0471945	0.0105921	4.45564	8.40341e-06	CA	ADD	7684	0.0112737	0.0185311	0.608368	0.542962	ca	c	-0.0383	0.0092	3.043e-05	--	64.7	2.832	1	0.0924	13	100680111
mocoRNFL_q5	14	29936108	rs61979121	G	A	A	ADD	26828	-0.0986067	0.0210164	-4.69189	2.72033e-06	A	ADD	8911	-0.0585859	0.0358915	-1.6323	0.102651	a	g	-0.0884	0.0181	1.096e-06	--	0	0.926	1	0.3359	14	29466902
mocoRNFL_q5	14	50948010	rs138885196	C	A	A	ADD	26154	-0.101658	0.0222719	-4.56441	5.03178e-06	A	ADD	8710	0.00564363	0.0381105	0.148086	0.882278	a	c	-0.0743	0.0192	0.0001106	-+	83.1	5.909	1	0.01506	14	50481292
mocoRNFL_q5	14	60806976	rs6573308	C	T	T	ADD	26241	-0.0459957	0.00896976	-5.12787	2.95128e-07	T	ADD	8713	-0.0256633	0.0156815	-1.63654	0.101764	t	c	-0.041	0.0078	1.412e-07	--	21.1	1.267	1	0.2604	14	60340258
mocoRNFL_q5	15	88473457	rs117652349	C	T	T	ADD	26828	-0.186953	0.0414268	-4.51286	6.42316e-06	T	ADD	8911	-0.0691179	0.0700307	-0.986966	0.323686	t	c	-0.1564	0.0357	1.151e-05	--	52.3	2.097	1	0.1476	15	87930226
mocoRNFL_q5	16	5051623	rs117187061	C	G	G	ADD	26524	0.095556	0.0211524	4.5175	6.28431e-06	G	ADD	8802	0.0446651	0.0370219	1.20645	0.227677	c	g	-0.083	0.0184	6.157e-06	--	29.8	1.425	1	0.2327	16	5001622
mocoRNFL_q5	16	7050762	rs4786957	T	C	C	ADD	23014	0.041295	0.00927222	4.45363	8.48295e-06	C	ADD	7614	-0.007357	0.0162043	-0.454015	0.649831	t	c	-0.0293	0.008	0.0002726	-+	85.3	6.791	1	0.009162	16	7000761
mocoRNFL_q5	17	30970541	rs114179497	G	A	A	ADD	26080	-0.0424785	0.00875521	-4.8518	1.23054e-06	A	ADD	8652	-0.0131684	0.0153351	-0.858706	0.390526	a	g	-0.0353	0.0076	3.497e-06	--	63.7	2.755	1	0.09695	17	32643523
mocoRNFL_q5	17	47661137	rs117842166	G	A	A	ADD	26652	0.102243	0.0224785	4.54847	5.42756e-06	A	ADD	8847	-0.0279728	0.0382838	-0.730669	0.465001	a	g	0.0689	0.0194	0.0003818	+-	88.4	8.603	1	0.003356	17	49583775
mocoRNFL_q5	17	69684778	rs2429962	A	G	G	ADD	24945	0.0411581	0.00921212	4.46782	7.93678e-06	G	ADD	8293	-0.0243976	0.016068	-1.51839	0.128953	a	g	-0.0249	0.008	0.001804	-+	92	12.528	1	0.000401	17	71688637
mocoRNFL_q5	18	12426485	rs181716178	A	G	G	ADD	26768	0.158391	0.0349864	4.52723	6.00207e-06	G	ADD	8886	0.000274108	0.0617912	0.00443604	0.996461	a	g	-0.12	0.0304	8.089e-05	--	79.8	4.958	1	0.02597	18	12426486
mocoRNFL_q5	18	45366422	rs12954768	T	G	G	ADD	26828	0.182958	0.0410428	4.45773	8.31676e-06	G	ADD	8911	-0.114317	0.0747974	-1.52836	0.126458	t	g	-0.1142	0.036	0.00151	-+	91.8	12.14	1	0.0004934	18	47840051
mocoRNFL_q5	19	18855301	rs551547406	A	C	C	ADD	23153	-0.106479	0.0225727	-4.71715	2.4057e-06	C	ADD	7592	-0.0606692	0.0384023	-1.57983	0.114187	a	c	0.0947	0.0195	1.132e-06	++	5.4	1.058	1	0.3038	19	18744491
mocoRNFL_q5	19	38505312	19:38505312_AT_A	AT	A	AT	ADD	25808	-0.0457933	0.00994682	-4.60382	4.16795e-06	AT	ADD	8540	-0.0144242	0.0172483	-0.836265	0.403029	a	at	-0.038	0.0086	1.053e-05	--	59.7	2.482	1	0.1151	19	38014672
trait	CHROM	POS	ID	REF	ALT	A1	TEST	OBS_CT	BETA	SE	T_STAT	P	A1.repl	TEST.repl	OBS_CT.repl	BETA.repl	SE.repl	T_STAT.repl	P.repl	Allele1	Allele2	Effect	StdErr	P-value	Direction	HetISq	HetChiSq	HetDf	HetPVal	CHROM_b38	POS_b38
mocoRNFL_q7	1	10979242	rs1280965	C	T	T	ADD	25604	-0.0440167	0.00993191	-4.43185	9.38165e-06	T	ADD	8513	0.0114018	0.0171666	0.664183	0.506591	t	c	-0.0301	0.0086	0.0004592	-+	87.2	7.808	1	0.005201	1	10919185
mocoRNFL_q7	1	78111655	rs373733260	CA	C	C	ADD	22650	0.0865963	0.0194833	4.44465	8.84542e-06	C	ADD	7484	0.0326617	0.0342117	0.954695	0.339763	ca	c	-0.0734	0.0169	1.46e-05	--	46.7	1.877	1	0.1707	1	77645970
mocoRNFL_q7	1	112205532	rs371929210	T	TTTG	TTTG	ADD	26380	-0.0746223	0.0158714	-4.70167	2.59343e-06	TTTG	ADD	8764	-0.00414996	0.027176	-0.152707	0.878633	t	tttg	0.0567	0.0137	3.519e-05	++	80.1	5.014	1	0.02514	1	111662910
mocoRNFL_q7	1	175126644	rs3737933	G	A	G	ADD	26828	0.0539389	0.0115876	4.65488	3.25724e-06	G	ADD	8911	0.0196782	0.0200605	0.980943	0.326647	a	g	0.0454	0.01	6.143e-06	++	54.3	2.187	1	0.1392	1	175157508
mocoRNFL_q7	2	60238635	rs28602839	T	A	A	ADD	26544	0.0410076	0.00893267	4.59074	4.43699e-06	A	ADD	8814	0.0203018	0.0152864	1.32809	0.184182	a	t	0.0357	0.0077	3.592e-06	++	26.9	1.368	1	0.2422	2	60011500
mocoRNFL_q7	2	169603282	rs200330650	A	AGG	AGG	ADD	26364	0.0602235	0.0136154	4.4232	9.76377e-06	AGG	ADD	8754	-0.0338808	0.0234315	-1.44595	0.148227	a	agg	-0.0365	0.0118	0.001949	-+	91.7	12.058	1	0.0005157	2	168746772
mocoRNFL_q7	2	172595613	rs137902140	T	TG	T	ADD	21470	-0.0519475	0.0100689	-5.15918	2.50238e-07	T	ADD	7180	-0.0406496	0.0176969	-2.297	0.0216477	t	tg	0.0492	0.0088	1.908e-08	++	0	0.308	1	0.579	2	171739103
mocoRNFL_q7	2	178680005	rs138040203	C	CT	CT	ADD	26692	0.0410296	0.00921629	4.45185	8.54785e-06	CT	ADD	8874	0.0244528	0.0160258	1.52584	0.127086	ct	c	0.0369	0.008	3.84e-06	++	0	0.804	1	0.3699	2	177815278
mocoRNFL_q7	2	220780565	2:220780565_AT_A	AT	A	A	ADD	26290	-0.0782504	0.0175335	-4.4629	8.11933e-06	A	ADD	8727	0.014397	0.0304783	0.472368	0.636676	a	at	-0.0552	0.0152	0.0002802	-+	85.6	6.943	1	0.008416	2	219915844
mocoRNFL_q7	3	8674677	rs4686281	T	C	T	ADD	26828	-0.0463347	0.00931541	-4.97399	6.59949e-07	T	ADD	8911	-0.013844	0.0162415	-0.852387	0.394022	t	c	0.0383	0.0081	2.15e-06	++	66.8	3.011	1	0.08269	3	8632991
mocoRNFL_q7	3	68971956	rs78322192	G	A	A	ADD	26665	0.137064	0.0297672	4.60454	4.15293e-06	A	ADD	8838	-0.0427525	0.0534252	-0.80023	0.423599	a	g	0.0945	0.026	0.0002803	+-	88.4	8.645	1	0.00328	3	68922805
mocoRNFL_q7	3	148984436	rs73166874	A	T	T	ADD	26700	0.142864	0.0323054	4.42228	9.80499e-06	T	ADD	8870	-0.00146163	0.0566076	-0.0258204	0.979401	a	t	-0.1074	0.0281	0.0001292	-+	79.6	4.903	1	0.0268	3	149266649
mocoRNFL_q7	3	190993227	rs3732709	C	T	T	ADD	26621	-0.243397	0.0524096	-4.64414	3.43135e-06	T	ADD	8846	0.0940357	0.0829551	1.13357	0.257005	t	c	-0.1471	0.0443	0.0008978	-+	91.5	11.826	1	0.0005842	3	191275438
mocoRNFL_q7	4	37136734	rs75738358	A	C	C	ADD	26711	0.0944687	0.0199632	4.73214	2.23302e-06	C	ADD	8878	-0.0330739	0.0350391	-0.943914	0.345239	a	c	-0.0632	0.0173	0.0002681	-+	90	10.003	1	0.001563	4	37135112
mocoRNFL_q7	4	153569854	rs150327913	C	G	G	ADD	26218	0.117305	0.0261071	4.49322	7.04531e-06	G	ADD	8689	0.0529065	0.0457664	1.15601	0.247708	c	g	-0.1015	0.0227	7.617e-06	--	33.1	1.494	1	0.2216	4	152648702
mocoRNFL_q7	8	1192575	rs150153706	G	A	A	ADD	26623	-0.24954	0.053463	-4.66752	3.06338e-06	A	ADD	8834	-0.0628784	0.080865	-0.777573	0.436842	a	g	-0.1928	0.0446	1.544e-05	--	73	3.708	1	0.05416	8	1242575
mocoRNFL_q7	8	96535247	rs3105008	C	T	T	ADD	26257	-0.0705835	0.0147806	-4.7754	1.80314e-06	T	ADD	8706	-0.0273046	0.0258263	-1.05724	0.290431	t	c	-0.0599	0.0128	3.015e-06	--	52.7	2.115	1	0.1458	8	95523019
mocoRNFL_q7	9	236202	rs62531271	G	A	A	ADD	26602	-0.162933	0.0329506	-4.94477	7.66976e-07	A	ADD	8831	-0.0101387	0.0589752	-0.171914	0.863509	a	g	-0.1266	0.0288	1.08e-05	--	80.5	5.115	1	0.02371	9	236202
mocoRNFL_q7	9	139973614	9:139973614_T_C	T	C	C	ADD	25104	-0.062812	0.0140673	-4.46512	8.03726e-06	C	ADD	8351	-0.011699	0.0244464	-0.478559	0.632265	t	c	0.0501	0.0122	3.977e-05	++	69.6	3.284	1	0.06995	9	137079162
mocoRNFL_q7	11	43593010	rs11037479	T	C	C	ADD	25537	0.0513973	0.0113995	4.50872	6.55086e-06	C	ADD	8464	-0.00671184	0.0197175	-0.3404	0.733564	t	c	-0.0368	0.0099	0.0001892	-+	84.6	6.51	1	0.01073	11	43571460
mocoRNFL_q7	11	99068542	rs11218766	T	A	A	ADD	26821	-0.0677933	0.01521	-4.45715	8.33948e-06	A	ADD	8907	0.00132693	0.0260183	0.0509999	0.959327	a	t	-0.0502	0.0131	0.0001323	-+	81	5.26	1	0.02182	11	99197811
mocoRNFL_q7	12	46622269	rs7979828	A	T	A	ADD	26399	0.0454705	0.010006	4.54434	5.53511e-06	A	ADD	8776	0.00878102	0.0172583	0.508801	0.610905	a	t	-0.0362	0.0087	2.832e-05	--	70.4	3.382	1	0.06589	12	46228486
mocoRNFL_q7	12	78467266	rs187618698	G	A	A	ADD	26042	-0.135756	0.0297041	-4.57029	4.89277e-06	A	ADD	8654	-0.0747826	0.0517196	-1.44592	0.148235	a	g	-0.1206	0.0258	2.823e-06	--	4.3	1.045	1	0.3066	12	78073486
mocoRNFL_q7	13	103225700	rs1015795	A	G	G	ADD	26680	-0.0413329	0.00865096	-4.77784	1.78128e-06	G	ADD	8871	-0.0164705	0.0150791	-1.09228	0.274741	a	g	0.0352	0.0075	2.762e-06	++	51.1	2.045	1	0.1527	13	102573350
mocoRNFL_q7	15	55912528	rs1438915	C	T	T	ADD	26718	-0.077421	0.0159689	-4.84824	1.25262e-06	T	ADD	8878	0.0111482	0.0274107	0.406711	0.68423	t	c	-0.055	0.0138	6.764e-05	-+	87.2	7.795	1	0.005239	15	55620330
mocoRNFL_q7	17	5939014	rs756696	C	T	C	ADD	26828	0.0390151	0.00866871	4.50068	6.80205e-06	C	ADD	8911	-0.00570748	0.0150518	-0.379189	0.704557	t	c	0.0279	0.0075	0.0002066	+-	84.9	6.629	1	0.01003	17	6035694
mocoRNFL_q7	18	12365870	rs561634847	C	CT	CT	ADD	24740	-0.13526	0.0290115	-4.66228	3.14351e-06	CT	ADD	8252	-0.0139714	0.0508638	-0.274682	0.783567	ct	c	-0.1055	0.0252	2.84e-05	--	76.7	4.29	1	0.03833	18	12365871
mocoRNFL_q7	20	59948783	rs73134340	A	G	G	ADD	26538	-0.100008	0.022391	-4.46646	7.98511e-06	G	ADD	8832	0.0148986	0.0394229	0.377917	0.705502	a	g	0.072	0.0195	0.0002181	+-	84.4	6.423	1	0.01126	20	61373727
trait	CHROM	POS	ID	REF	ALT	A1	TEST	OBS_CT	BETA	SE	T_STAT	P	A1.repl	TEST.repl	OBS_CT.repl	BETA.repl	SE.repl	T_STAT.repl	P.repl	Allele1	Allele2	Effect	StdErr	P-value	Direction	HetISq	HetChiSq	HetDf	HetPVal	CHROM_b38	POS_b38
mocoRNFL_q9	1	80862563	rs200327339	G	T	T	ADD	26740	0.107964	0.0237358	4.54857	5.42501e-06	T	ADD	8877	0.0239366	0.0387986	0.616946	0.537286	t	g	0.0851	0.0202	2.645e-05	++	70.7	3.413	1	0.06468	1	80396878
mocoRNFL_q9	2	217676445	rs12989118	G	A	A	ADD	26488	0.0598122	0.0116973	5.11335	3.18699e-07	A	ADD	8795	-0.0198765	0.0200474	-0.991476	0.321481	a	g	0.0396	0.0101	8.972e-05	+-	91.5	11.788	1	0.0005963	2	216811722
mocoRNFL_q9	3	134115209	rs13090918	T	C	C	ADD	26828	0.118567	0.0256964	4.61414	3.96542e-06	C	ADD	8911	-0.0844905	0.0427248	-1.97755	0.0480102	t	c	-0.0646	0.022	0.003337	-+	94	16.588	1	4.645e-05	3	134396367
mocoRNFL_q9	4	7163777	rs10025786	A	C	C	ADD	26726	0.0751378	0.0169733	4.42682	9.60102e-06	C	ADD	8867	-0.0790066	0.0307356	-2.57052	0.0101708	a	c	-0.0391	0.0149	0.008475	-+	94.8	19.274	1	1.132e-05	4	7162050
mocoRNFL_q9	4	36581251	rs28896237	T	C	C	ADD	26444	0.0799871	0.016239	4.92563	8.45971e-07	C	ADD	8779	-0.0121907	0.0279473	-0.436203	0.6627	t	c	-0.0567	0.014	5.352e-05	-+	87.7	8.133	1	0.004347	4	36579629
mocoRNFL_q9	4	40358248	rs75335740	T	C	C	ADD	26656	0.167609	0.0332141	5.04631	4.53381e-07	C	ADD	8850	-0.130413	0.0575609	-2.26565	0.0234969	t	c	-0.0932	0.0288	0.001202	-+	95	20.111	1	7.309e-06	4	40356231
mocoRNFL_q9	4	61867142	rs76678291	A	C	C	ADD	26720	-0.223343	0.0493384	-4.52676	6.01545e-06	C	ADD	8882	0.00492112	0.0788416	0.0624179	0.950231	a	c	0.1591	0.0418	0.0001423	+-	83.4	6.023	1	0.01412	4	61001424
mocoRNFL_q9	4	145921788	rs150486520	G	A	A	ADD	26779	-0.186094	0.0369557	-5.03559	4.79461e-07	A	ADD	8894	0.102829	0.0617148	1.66621	0.0957076	a	g	-0.1098	0.0317	0.0005317	-+	93.8	16.132	1	5.906e-05	4	145000636
mocoRNFL_q9	5	67542082	rs251404	T	C	T	ADD	26828	-0.0561149	0.0114731	-4.891	1.00905e-06	T	ADD	8911	0.0222297	0.0198715	1.11867	0.263311	t	c	0.0365	0.0099	0.0002366	+-	91.4	11.658	1	0.0006394	5	68246254
mocoRNFL_q9	6	160631170	rs143520616	G	T	T	ADD	26642	0.129663	0.0290903	4.45726	8.33527e-06	T	ADD	8853	-0.0104113	0.049318	-0.211105	0.83281	t	g	0.0935	0.0251	0.00019	+-	83.3	5.985	1	0.01443	6	160210138
mocoRNFL_q9	7	18098582	rs35792482	A	T	T	ADD	26276	-0.121818	0.0249116	-4.89002	1.01419e-06	T	ADD	8702	-0.011321	0.0432191	-0.261943	0.793372	a	t	0.0943	0.0216	1.257e-05	++	79.6	4.906	1	0.02676	7	18058959
mocoRNFL_q9	7	42189656	rs74745318	G	T	T	ADD	26796	0.052374	0.0109254	4.79379	1.64537e-06	T	ADD	8902	0.0282399	0.0190714	1.48074	0.138711	t	g	0.0464	0.0095	9.799e-07	++	17.1	1.206	1	0.2722	7	42150057
mocoRNFL_q9	7	143095256	rs35251323	A	G	G	ADD	26828	-0.0406028	0.00876329	-4.63328	3.61611e-06	G	ADD	8911	-0.0210805	0.0152444	-1.38283	0.166751	a	g	0.0358	0.0076	2.526e-06	++	18.9	1.233	1	0.2669	7	143398163
mocoRNFL_q9	8	1879967	rs5013952	T	G	T	ADD	26373	0.0798997	0.0167275	4.77655	1.7929e-06	T	ADD	8752	-0.0409542	0.0290562	-1.40948	0.158728	t	g	-0.0498	0.0145	0.0005896	-+	92.3	12.994	1	0.0003126	8	1931801
mocoRNFL_q9	8	6697172	rs145435871	C	G	G	ADD	25917	-0.131063	0.0293116	-4.47135	7.8056e-06	G	ADD	8591	-0.010599	0.0531282	-0.199499	0.841877	c	g	0.103	0.0257	6.035e-05	++	74.6	3.941	1	0.04711	8	6839650
mocoRNFL_q9	8	19070677	rs74353688	G	C	C	ADD	26751	0.246291	0.0554022	4.44551	8.80345e-06	C	ADD	8886	0.0494593	0.10407	0.475252	0.634619	c	g	0.2028	0.0489	3.362e-05	++	64.1	2.787	1	0.09502	8	19213167
mocoRNFL_q9	9	34587687	rs12553479	C	T	T	ADD	26634	0.0786905	0.0176662	4.45429	8.45136e-06	T	ADD	8851	0.00781015	0.030803	0.253551	0.799848	t	c	0.0611	0.0153	6.605e-05	++	74.9	3.984	1	0.04592	9	34587689
mocoRNFL_q9	9	91279803	rs9696758	T	C	T	ADD	26828	0.137177	0.0307325	4.46358	8.09311e-06	T	ADD	8911	0.00504057	0.0533934	0.0944045	0.92479	t	c	-0.1043	0.0266	9.017e-05	--	78.3	4.6	1	0.03196	9	88664888
mocoRNFL_q9	9	96106521	rs71496439	G	C	C	ADD	26461	0.0655131	0.0134594	4.86745	1.13701e-06	C	ADD	8777	0.00950001	0.023454	0.405049	0.685451	c	g	0.0516	0.0117	9.72e-06	++	76.7	4.291	1	0.03832	9	93344239
mocoRNFL_q9	9	127990148	rs537186111	A	T	T	ADD	26425	0.405614	0.0896647	4.52368	6.10393e-06	T	ADD	8780	0.195599	0.167538	1.16749	0.243045	a	t	-0.3589	0.0791	5.644e-06	--	18.1	1.221	1	0.2691	9	125227869
mocoRNFL_q9	9	133070766	rs56163132	C	A	A	ADD	26828	-0.0855148	0.018781	-4.55327	5.30501e-06	A	ADD	8911	0.0427017	0.0322727	1.32315	0.185819	a	c	-0.0531	0.0162	0.001076	-+	91.5	11.791	1	0.0005952	9	130308487
mocoRNFL_q9	10	17552725	rs575719236	A	AT	AT	ADD	26252	-0.0520204	0.0111747	-4.65519	3.25263e-06	AT	ADD	8726	0.0120776	0.0193586	0.623891	0.532716	a	at	0.036	0.0097	0.0001994	+-	87.8	8.223	1	0.004136	10	17510726
mocoRNFL_q9	10	70023053	rs10762198	A	G	A	ADD	26703	0.058772	0.00978971	6.00345	1.95661e-09	A	ADD	8882	0.0710006	0.0169713	4.18357	2.89729e-05	a	g	-0.0618	0.0085	3.084e-13	--	0	0.39	1	0.5325	10	68263296
mocoRNFL_q9	11	95929945	rs523519	C	A	A	ADD	26019	-0.0413625	0.00879524	-4.70282	2.57903e-06	A	ADD	8634	-0.0209077	0.0152473	-1.37124	0.170336	a	c	-0.0363	0.0076	1.947e-06	--	25.9	1.35	1	0.2452	11	96196781
mocoRNFL_q9	12	70456427	rs10784821	G	A	A	ADD	26812	-0.0388307	0.00861268	-4.50856	6.55464e-06	A	ADD	8904	0.0214168	0.0150609	1.42202	0.155056	a	g	-0.024	0.0075	0.001337	-+	91.7	12.059	1	0.0005155	12	70062647
mocoRNFL_q9	12	94859737	12:94859737_TA_T	TA	T	T	ADD	20847	0.0722853	0.0155829	4.63878	3.5261e-06	T	ADD	6863	0.0382309	0.0264672	1.44447	0.148654	t	ta	0.0635	0.0134	2.243e-06	++	18.7	1.229	1	0.2675	12	94465961
mocoRNFL_q9	12	124844986	rs1263991	T	C	C	ADD	26828	-0.049652	0.0109417	-4.53788	5.70704e-06	C	ADD	8911	-0.00473454	0.0190203	-0.24892	0.803428	t	c	0.0385	0.0095	4.958e-05	++	76.1	4.19	1	0.04066	12	124360440
mocoRNFL_q9	13	62985213	rs149155585	T	A	A	ADD	26594	-0.0772162	0.0173434	-4.45221	8.53375e-06	A	ADD	8825	0.00562564	0.0300519	0.187198	0.85151	a	t	-0.0565	0.015	0.0001682	-+	82.5	5.7	1	0.01696	13	62411080
mocoRNFL_q9	13	88532235	rs143627461	C	G	G	ADD	26607	-0.193233	0.0388518	-4.97359	6.6135e-07	G	ADD	8839	-0.122694	0.0690156	-1.77776	0.0754769	c	g	0.1763	0.0339	1.928e-07	++	0	0.793	1	0.3731	13	87879980
mocoRNFL_q9	16	80537760	rs4635359	A	C	C	ADD	26628	-0.049987	0.00975723	-5.12308	3.02684e-07	C	ADD	8855	-0.0336292	0.0169405	-1.98513	0.0471607	a	c	0.0459	0.0085	5.631e-08	++	0	0.7	1	0.4027	16	80503863
mocoRNFL_q9	17	9768110	rs11657503	G	A	A	ADD	23932	0.102526	0.0228987	4.47738	7.5912e-06	A	ADD	7917	-0.00327812	0.0410604	-0.0798365	0.936369	a	g	0.0774	0.02	0.0001082	+-	80.3	5.065	1	0.02442	17	9864793
mocoRNFL_q9	17	10642522	rs77853872	T	C	C	ADD	26781	-0.410032	0.0909238	-4.50962	6.522e-06	C	ADD	8900	0.121353	0.163828	0.740739	0.458871	t	c	0.2849	0.0795	0.0003389	+-	87.6	8.043	1	0.004568	17	10739205
mocoRNFL_q9	18	10765747	rs1881087	C	A	A	ADD	24478	-0.0501705	0.0102825	-4.87921	1.0718e-06	A	ADD	8132	0.0251706	0.0178162	1.41279	0.157756	a	c	-0.0313	0.0089	0.000432	-+	92.5	13.414	1	0.0002497	18	10765749
mocoRNFL_q9	21	15767203	rs79429891	T	C	C	ADD	26786	-0.153196	0.0311854	-4.91241	9.0493e-07	C	ADD	8898	-0.0329853	0.0581429	-0.567314	0.570515	t	c	0.1263	0.0275	4.282e-06	++	69.9	3.32	1	0.06846	21	14394882
