# Supplementary material for: Deep-learning-derived glaucoma-related endophenotypes enable novel genome-wide genetic and functional discovery
Source: Research Square preprint supplement (doi:10.21203/rs.3.rs-8311177/v1), 2026-01-22
Supplement: Supplementary file 3 [file SI_File_10.xlsx]

## Sheet: Sheet1
population	endophenotype		Pass_Bonferroni	FULL_NAME	VARIABLE	TYPE	NGENES	BETA	BETA_STD	SE	P
Cross-ancestry	moco_RNFL_q1		TRUE	ACEVEDO_LIVER_CANCER_WITH_H3K9ME3_DN	ACEVEDO_LIVER_CANCER_WITH_H3...3	SET	97	0.21927	0.015533	0.081554	0.0035918
Cross-ancestry	moco_RNFL_q5		TRUE	AFFAR_YY1_TARGETS_DN	AFFAR_YY1_TARGETS_DN	SET	240	0.14253	0.015823	0.053605	0.003924
Cross-ancestry	auto_GCC_q10		TRUE	ANASTASSIOU_MULTICANCER_INVASIVENESS_SIGNATURE	ANASTASSIOU_MULTICANCER_INVA...	SET	62	0.2837	0.016082	0.098099	0.0019172
Cross-ancestry	auto_RNFL_q0		TRUE	ANDERSEN_LIVER_CANCER_KRT19_UP	ANDERSEN_LIVER_CANCER_KRT19_...2	SET	34	0.36663	0.015402	0.13465	0.0032403
Cross-ancestry	auto_RNFL_q1		TRUE	ANDERSEN_LIVER_CANCER_KRT19_UP	ANDERSEN_LIVER_CANCER_KRT19_...2	SET	34	0.33835	0.014214	0.13403	0.0057998
Cross-ancestry	auto_RNFL_q7		TRUE	ASTON_MAJOR_DEPRESSIVE_DISORDER_UP	ASTON_MAJOR_DEPRESSIVE_DISOR...2	SET	45	0.31137	0.015044	0.12588	0.0066938
Cross-ancestry	auto_GCC_q10		TRUE	AUJLA_IL22_AND_IL17A_SIGNALING	AUJLA_IL22_AND_IL17A_SIGNALI...	SET	10	0.70025	0.015964	0.34339	0.020722
Cross-ancestry	auto_GCC_q3		TRUE	AZARE_NEOPLASTIC_TRANSFORMATION_BY_STAT3_DN	AZARE_NEOPLASTIC_TRANSFORMAT...1	SET	18	0.57128	0.017469	0.20478	0.0026415
Cross-ancestry	auto_GCC_q10		TRUE	AZARE_NEOPLASTIC_TRANSFORMATION_BY_STAT3_DN	AZARE_NEOPLASTIC_TRANSFORMAT...1	SET	18	0.47568	0.014546	0.20317	0.0096173
Cross-ancestry	auto_RNFL_q3		TRUE	BENPORATH_ES_WITH_H3K27ME3	BENPORATH_ES_WITH_H3K27ME3	SET	1038	0.081852	0.018496	0.026158	0.00087825
Cross-ancestry	auto_RNFL_q3		TRUE	BENPORATH_PRC2_TARGETS	BENPORATH_PRC2_TARGETS	SET	599	0.11239	0.019523	0.03477	0.00061565
Cross-ancestry	moco_RNFL_q1		TRUE	BERENJENO_TRANSFORMED_BY_RHOA_FOREVER_DN	BERENJENO_TRANSFORMED_BY_RHO...2	SET	28	0.38586	0.014712	0.12785	0.0012738
Cross-ancestry	auto_GCC_q6		TRUE	BHATI_G2M_ARREST_BY_2METHOXYESTRADIOL_DN	BHATI_G2M_ARREST_BY_2METHOXY...1	SET	118	0.18408	0.014375	0.07385	0.0063449
Cross-ancestry	auto_GCC_q8		TRUE	BIOCARTA_EEA1_PATHWAY	BIOCARTA_EEA1_PATHWAY	SET	7	1.0726	0.02046	0.29709	0.00015347
Cross-ancestry	moco_RNFL_q1		TRUE	BRACHAT_RESPONSE_TO_CISPLATIN	BRACHAT_RESPONSE_TO_CISPLATIN	SET	20	0.59023	0.019024	0.18711	0.00080591
Cross-ancestry	auto_GCC_q10		TRUE	CLASPER_LYMPHATIC_VESSELS_DURING_METASTASIS_DN	CLASPER_LYMPHATIC_VESSELS_DU...1	SET	33	0.38494	0.015932	0.13678	0.0024472
Cross-ancestry	auto_GCC_q6		TRUE	CLIMENT_BREAST_CANCER_COPY_NUMBER_DN	CLIMENT_BREAST_CANCER_COPY_N...1	SET	8	0.96677	0.019714	0.36374	0.0039362
Cross-ancestry	auto_GCC_q10		TRUE	CREIGHTON_ENDOCRINE_THERAPY_RESISTANCE_5	CREIGHTON_ENDOCRINE_THERAPY_...5	SET	455	0.11182	0.016994	0.036723	0.0011662
Cross-ancestry	auto_GCC_q6		TRUE	DAVICIONI_PAX_FOXO1_SIGNATURE_IN_ARMS_UP	DAVICIONI_PAX_FOXO1_SIGNATUR...2	SET	53	0.32652	0.017118	0.103	0.00076375
Cross-ancestry	auto_GCC_q4		TRUE	DODD_NASOPHARYNGEAL_CARCINOMA_UP	DODD_NASOPHARYNGEAL_CARCINOM...2	SET	1600	0.060899	0.016819	0.021175	0.0020168
Cross-ancestry	auto_RNFL_q1		TRUE	DUTERTRE_ESTRADIOL_RESPONSE_6HR_DN	DUTERTRE_ESTRADIOL_RESPONSE_...3	SET	89	0.26759	0.018161	0.084816	0.00080435
Cross-ancestry	auto_GCC_q6		TRUE	EHLERS_ANEUPLOIDY_UP	EHLERS_ANEUPLOIDY_UP	SET	39	0.3071	0.013815	0.12045	0.0053977
Cross-ancestry	auto_GCC_q8		TRUE	ELVIDGE_HIF1A_AND_HIF2A_TARGETS_UP	ELVIDGE_HIF1A_AND_HIF2A_TARG...2	SET	39	0.32637	0.014682	0.11706	0.0026557
Cross-ancestry	auto_GCC_q6		TRUE	ENGELMANN_CANCER_PROGENITORS_DN	ENGELMANN_CANCER_PROGENITORS...1	SET	64	0.26237	0.01511	0.09612	0.0031745
Cross-ancestry	auto_GCC_q10		TRUE	ENK_UV_RESPONSE_EPIDERMIS_UP	ENK_UV_RESPONSE_EPIDERMIS_UP	SET	281	0.11043	0.01325	0.044104	0.0061488
Cross-ancestry	auto_GCC_q8		TRUE	ENK_UV_RESPONSE_KERATINOCYTE_UP	ENK_UV_RESPONSE_KERATINOCYTE...2	SET	500	0.096975	0.015432	0.036778	0.0041897
Cross-ancestry	auto_GCC_q6		TRUE	FLECHNER_BIOPSY_KIDNEY_TRANSPLANT_OK_VS_DONOR_UP	FLECHNER_BIOPSY_KIDNEY_TRANS...2	SET	531	0.094724	0.015521	0.035033	0.0034313
Cross-ancestry	auto_GCC_q6		TRUE	FLECHNER_PBL_KIDNEY_TRANSPLANT_OK_VS_DONOR_DN	FLECHNER_PBL_KIDNEY_TRANSPLA...1	SET	39	0.49568	0.022299	0.1253	3.829e-05
Cross-ancestry	auto_GCC_q10		TRUE	GARGALOVIC_RESPONSE_TO_OXIDIZED_PHOSPHOLIPIDS_LIGHTGREEN_DN	GARGALOVIC_RESPONSE_TO_OXIDI...11	SET	8	1.062	0.021655	0.2894	0.00012197
Cross-ancestry	auto_GCC_q6		TRUE	GHANDHI_BYSTANDER_IRRADIATION_DN	GHANDHI_BYSTANDER_IRRADIATIO...1	SET	11	0.7164	0.017128	0.27386	0.0044541
Cross-ancestry	auto_RNFL_q3		TRUE	GHO_ATF5_TARGETS_DN	GHO_ATF5_TARGETS_DN	SET	16	0.50052	0.014431	0.19313	0.0047818
Cross-ancestry	moco_GCC_q8		TRUE	GNATENKO_PLATELET_SIGNATURE	GNATENKO_PLATELET_SIGNATURE	SET	35	0.29578	0.012607	0.13292	0.013038
Cross-ancestry	auto_GCC_q6		TRUE	HSIAO_HOUSEKEEPING_GENES	HSIAO_HOUSEKEEPING_GENES	SET	371	0.08235	0.011327	0.04094	0.022148
Cross-ancestry	auto_RNFL_q7		TRUE	IM_SREBF1A_TARGETS	IM_SREBF1A_TARGETS	SET	5	0.87104	0.014043	0.36365	0.0083106
Cross-ancestry	auto_RNFL_q1		TRUE	IZADPANAH_STEM_CELL_ADIPOSE_VS_BONE_DN	IZADPANAH_STEM_CELL_ADIPOSE_...1	SET	103	0.23956	0.017484	0.072719	0.00049465
Cross-ancestry	auto_GCC_q4		TRUE	IZADPANAH_STEM_CELL_ADIPOSE_VS_BONE_DN	IZADPANAH_STEM_CELL_ADIPOSE_...1	SET	103	0.21309	0.015553	0.073552	0.0018858
Cross-ancestry	auto_GCC_q8		TRUE	IZADPANAH_STEM_CELL_ADIPOSE_VS_BONE_DN	IZADPANAH_STEM_CELL_ADIPOSE_...1	SET	103	0.17179	0.012538	0.073806	0.0099742
Cross-ancestry	moco_RNFL_q5		TRUE	IZADPANAH_STEM_CELL_ADIPOSE_VS_BONE_DN	IZADPANAH_STEM_CELL_ADIPOSE_...1	SET	103	0.14417	0.010523	0.073381	0.024735
Cross-ancestry	auto_GCC_q8		TRUE	JECHLINGER_EPITHELIAL_TO_MESENCHYMAL_TRANSITION_DN	JECHLINGER_EPITHELIAL_TO_MES...1	SET	60	0.27836	0.015524	0.092766	0.0013492
Cross-ancestry	auto_GCC_q4		TRUE	JECHLINGER_EPITHELIAL_TO_MESENCHYMAL_TRANSITION_DN	JECHLINGER_EPITHELIAL_TO_MES...1	SET	60	0.26469	0.014761	0.09246	0.0021032
Cross-ancestry	auto_GCC_q4		TRUE	JEON_SMAD6_TARGETS_UP	JEON_SMAD6_TARGETS_UP	SET	24	0.39938	0.0141	0.16866	0.0089487
Cross-ancestry	moco_RNFL_q1		TRUE	JONES_TCOF1_TARGETS	JONES_TCOF1_TARGETS	SET	5	1.0698	0.017248	0.34465	0.0009564
Cross-ancestry	auto_GCC_q6		TRUE	KEGG_CALCIUM_SIGNALING_PATHWAY	KEGG_CALCIUM_SIGNALING_PATHW...	SET	167	0.2223	0.020625	0.060671	0.00012459
Cross-ancestry	moco_RNFL_q1		TRUE	KHETCHOUMIAN_TRIM24_TARGETS_DN	KHETCHOUMIAN_TRIM24_TARGETS_...1	SET	7	0.83133	0.015857	0.39419	0.017483
Cross-ancestry	moco_RNFL_q1		TRUE	KHETCHOUMIAN_TRIM24_TARGETS_UP	KHETCHOUMIAN_TRIM24_TARGETS_...2	SET	44	0.31692	0.015141	0.11428	0.0027789
Cross-ancestry	moco_RNFL_q5		TRUE	KOMMAGANI_TP63_GAMMA_TARGETS	KOMMAGANI_TP63_GAMMA_TARGETS	SET	9	0.83294	0.018014	0.25239	0.00048421
Cross-ancestry	auto_RNFL_q0		TRUE	KOYAMA_SEMA3B_TARGETS_UP	KOYAMA_SEMA3B_TARGETS_UP	SET	232	0.15461	0.016878	0.050191	0.0010358
Cross-ancestry	auto_GCC_q8		TRUE	LOPEZ_TRANSLATION_VIA_FN1_SIGNALING	LOPEZ_TRANSLATION_VIA_FN1_SI...	SET	35	0.48659	0.020739	0.15813	0.0010471
Cross-ancestry	moco_RNFL_q5		TRUE	LOPEZ_TRANSLATION_VIA_FN1_SIGNALING	LOPEZ_TRANSLATION_VIA_FN1_SI...	SET	35	0.4233	0.018042	0.15722	0.003552
Cross-ancestry	auto_GCC_q10		TRUE	MAHADEVAN_IMATINIB_RESISTANCE_DN	MAHADEVAN_IMATINIB_RESISTANC...1	SET	19	0.64513	0.020267	0.19065	0.00035846
Cross-ancestry	auto_GCC_q10		TRUE	MURAKAMI_UV_RESPONSE_24HR	MURAKAMI_UV_RESPONSE_24HR	SET	19	0.53097	0.016681	0.1761	0.0012868
Cross-ancestry	moco_RNFL_q1		TRUE	NEWMAN_ERCC6_TARGETS_DN	NEWMAN_ERCC6_TARGETS_DN	SET	36	0.38269	0.016542	0.12444	0.0010539
Cross-ancestry	auto_GCC_q4		TRUE	NIKOLSKY_BREAST_CANCER_17Q21_Q25_AMPLICON	NIKOLSKY_BREAST_CANCER_17Q21...	SET	329	0.26618	0.034515	0.081542	0.00055008
Cross-ancestry	auto_GCC_q8		TRUE	NOJIMA_SFRP2_TARGETS_UP	NOJIMA_SFRP2_TARGETS_UP	SET	31	0.31456	0.012619	0.12457	0.0057879
Cross-ancestry	auto_GCC_q3		TRUE	ONDER_CDH1_SIGNALING_VIA_CTNNB1	ONDER_CDH1_SIGNALING_VIA_CTN...	SET	79	0.24799	0.015861	0.088267	0.0024842
Cross-ancestry	auto_GCC_q6		TRUE	PID_VEGFR1_2_PATHWAY	PID_VEGFR1_2_PATHWAY	SET	69	0.35106	0.02099	0.096048	0.00012907
Cross-ancestry	auto_GCC_q6		TRUE	REACTOME_SUPPRESSION_OF_PHAGOSOMAL_MATURATION	REACTOME_SUPPRESSION_OF_PHAG...	SET	13	0.87294	0.022688	0.2166	2.8007e-05
Cross-ancestry	auto_RNFL_q3		TRUE	RHEIN_ALL_GLUCOCORTICOID_THERAPY_DN	RHEIN_ALL_GLUCOCORTICOID_THE...1	SET	339	0.10388	0.013669	0.043698	0.0087298
Cross-ancestry	moco_GCC_q8		TRUE	RICKMAN_HEAD_AND_NECK_CANCER_D	RICKMAN_HEAD_AND_NECK_CANCER...4	SET	33	0.42746	0.017692	0.13755	0.00094479
Cross-ancestry	moco_RNFL_q5		TRUE	RYAN_MANTLE_CELL_LYMPHOMA_NOTCH_DIRECT_UP	RYAN_MANTLE_CELL_LYMPHOMA_NO...	SET	147	0.14015	0.012206	0.066264	0.017221
Cross-ancestry	moco_RNFL_q5		TRUE	SEAVEY_EPITHELIOID_HEMANGIOENDOTHELIOMA	SEAVEY_EPITHELIOID_HEMANGIOE...	SET	91	0.26411	0.018125	0.076169	0.00026349
Cross-ancestry	auto_GCC_q4		TRUE	STEIN_ESTROGEN_RESPONSE_NOT_VIA_ESRRA	STEIN_ESTROGEN_RESPONSE_NOT_...	SET	17	0.79531	0.023635	0.21468	0.00010628
Cross-ancestry	auto_GCC_q8		TRUE	STEIN_ESTROGEN_RESPONSE_NOT_VIA_ESRRA	STEIN_ESTROGEN_RESPONSE_NOT_...	SET	17	0.66715	0.019826	0.21543	0.00098011
Cross-ancestry	auto_GCC_q4		TRUE	TAYLOR_METHYLATED_IN_ACUTE_LYMPHOBLASTIC_LEUKEMIA	TAYLOR_METHYLATED_IN_ACUTE_L...	SET	75	0.30404	0.018949	0.10025	0.0012142
Cross-ancestry	auto_RNFL_q7		TRUE	TCGA_GLIOBLASTOMA_COPY_NUMBER_DN	TCGA_GLIOBLASTOMA_COPY_NUMBE...1	SET	29	0.5387	0.020903	0.17796	0.0012373
Cross-ancestry	moco_RNFL_q1		TRUE	TCGA_GLIOBLASTOMA_COPY_NUMBER_DN	TCGA_GLIOBLASTOMA_COPY_NUMBE...1	SET	29	0.45663	0.017719	0.18329	0.0063695
Cross-ancestry	moco_RNFL_q1		TRUE	TIMOFEEVA_GROWTH_STRESS_VIA_STAT1_DN	TIMOFEEVA_GROWTH_STRESS_VIA_...	SET	16	0.66614	0.019206	0.23945	0.0027056
Cross-ancestry	auto_RNFL_q3		TRUE	TING_SILENCED_BY_DICER	TING_SILENCED_BY_DICER	SET	29	0.4593	0.017822	0.1522	0.0012755
Cross-ancestry	auto_RNFL_q7		TRUE	TOMLINS_PROSTATE_CANCER_DN	TOMLINS_PROSTATE_CANCER_DN	SET	39	0.3482	0.015664	0.11577	0.0013181
Cross-ancestry	auto_RNFL_q1		TRUE	TSUNODA_CISPLATIN_RESISTANCE_UP	TSUNODA_CISPLATIN_RESISTANCE...2	SET	14	0.71854	0.01938	0.2375	0.0012435
Cross-ancestry	moco_RNFL_q1		TRUE	TSUTSUMI_FBXW8_TARGETS	TSUTSUMI_FBXW8_TARGETS	SET	8	0.761	0.015518	0.27668	0.0029797
Cross-ancestry	moco_RNFL_q1		TRUE	WNT_SIGNALING	WNT_SIGNALING	SET	87	0.19218	0.012897	0.091666	0.018027
Cross-ancestry	auto_RNFL_q7		TRUE	WP_SARSCOV2_B117_VARIANT_ANTAGONISES_INNATE_IMMUNE_ACTIVATION	WP_SARSCOV2_B117_VARIANT_ANT...	SET	8	1.062	0.021656	0.27672	6.2316e-05
Cross-ancestry	auto_GCC_q3		TRUE	WU_HBX_TARGETS_1_UP	WU_HBX_TARGETS_1_UP	SET	14	0.6885	0.018569	0.23331	0.0015864
Cross-ancestry	auto_GCC_q3		TRUE	WU_HBX_TARGETS_2_UP	WU_HBX_TARGETS_2_UP	SET	22	0.50136	0.016947	0.16858	0.0014723
Cross-ancestry	auto_GCC_q8		TRUE	XIE_LT_HSC_S1PR3_OE_UP	XIE_LT_HSC_S1PR3_OE_UP	SET	28	0.42771	0.016308	0.16306	0.0043631
Cross-ancestry	auto_GCC_q4		TRUE	XIE_LT_HSC_S1PR3_OE_UP	XIE_LT_HSC_S1PR3_OE_UP	SET	28	0.40151	0.015309	0.16252	0.006753
Cross-ancestry	auto_GCC_q6		TRUE	XU_HGF_TARGETS_REPRESSED_BY_AKT1_UP	XU_HGF_TARGETS_REPRESSED_BY_...2	SET	8	0.73586	0.015005	0.25124	0.0017033
Cross-ancestry	auto_RNFL_q0		TRUE	YEMELYANOV_GR_TARGETS_DN	YEMELYANOV_GR_TARGETS_DN	SET	10	0.50074	0.011415	0.23158	0.015306
EUR	moco_RNFL_q5		TRUE	AFFAR_YY1_TARGETS_DN	AFFAR_YY1_TARGETS_DN	SET	240	0.13453	0.014935	0.055567	0.0077436
EUR	moco_RNFL_q1		TRUE	AFFAR_YY1_TARGETS_DN	AFFAR_YY1_TARGETS_DN	SET	240	0.11823	0.013125	0.057187	0.019353
EUR	autoc_GCC_q2		TRUE	AKL_HTLV1_INFECTION_DN	AKL_HTLV1_INFECTION_DN	SET	64	0.22542	0.012982	0.099321	0.011625
EUR	auto_GCC_q8		TRUE	AKL_HTLV1_INFECTION_UP	AKL_HTLV1_INFECTION_UP	SET	26	0.31214	0.011469	0.15339	0.020939
EUR	auto_RNFL_q0		TRUE	ANDERSEN_LIVER_CANCER_KRT19_UP	ANDERSEN_LIVER_CANCER_KRT19_...2	SET	34	0.377	0.015838	0.14157	0.0038773
EUR	auto_RNFL_q7		TRUE	ASTON_MAJOR_DEPRESSIVE_DISORDER_UP	ASTON_MAJOR_DEPRESSIVE_DISOR...2	SET	45	0.31662	0.015298	0.13009	0.0074738
EUR	auto_RNFL_q1		TRUE	AUNG_GASTRIC_CANCER	AUNG_GASTRIC_CANCER	SET	48	0.25816	0.012881	0.12638	0.02055
EUR	auto_RNFL_q1		TRUE	AZARE_NEOPLASTIC_TRANSFORMATION_BY_STAT3_DN	AZARE_NEOPLASTIC_TRANSFORMAT...1	SET	18	0.47478	0.014518	0.21464	0.013491
EUR	auto_RNFL_q3		TRUE	BENPORATH_ES_WITH_H3K27ME3	BENPORATH_ES_WITH_H3K27ME3	SET	1038	0.084163	0.019018	0.027107	0.00095405
EUR	auto_RNFL_q1		TRUE	BERENJENO_TRANSFORMED_BY_RHOA_FOREVER_DN	BERENJENO_TRANSFORMED_BY_RHO...2	SET	28	0.4127	0.015736	0.13113	0.00082574
EUR	auto_RNFL_q1		TRUE	BHAT_ESR1_TARGETS_VIA_AKT1_DN	BHAT_ESR1_TARGETS_VIA_AKT1_DN	SET	82	0.28117	0.018321	0.093038	0.0012574
EUR	auto_RNFL_q8		TRUE	BOYLAN_MULTIPLE_MYELOMA_C_D_UP	BOYLAN_MULTIPLE_MYELOMA_C_D_...2	SET	132	0.23992	0.019808	0.069612	0.00028483
EUR	auto_GCC_q6		TRUE	CLIMENT_BREAST_CANCER_COPY_NUMBER_DN	CLIMENT_BREAST_CANCER_COPY_N...1	SET	8	0.97767	0.019936	0.38153	0.0052014
EUR	autoc_GCC_q2		TRUE	CREIGHTON_ENDOCRINE_THERAPY_RESISTANCE_5	CREIGHTON_ENDOCRINE_THERAPY_...5	SET	455	0.11285	0.017151	0.038668	0.0017618
EUR	auto_RNFL_q7		TRUE	CUI_TCF21_TARGETS_2_DN	CUI_TCF21_TARGETS_2_DN	SET	802	0.074454	0.014884	0.029115	0.0052805
EUR	auto_RNFL_q1		TRUE	DUTERTRE_ESTRADIOL_RESPONSE_6HR_DN	DUTERTRE_ESTRADIOL_RESPONSE_...3	SET	89	0.33783	0.022928	0.089726	8.3581e-05
EUR	autoc_GCC_q2		TRUE	DUTERTRE_ESTRADIOL_RESPONSE_6HR_DN	DUTERTRE_ESTRADIOL_RESPONSE_...3	SET	89	0.24696	0.016761	0.089452	0.0028871
EUR	auto_GCC_q6		TRUE	EHLERS_ANEUPLOIDY_UP	EHLERS_ANEUPLOIDY_UP	SET	39	0.32591	0.014662	0.12634	0.0049503
EUR	moco_GCC_q3		TRUE	EHRLICH_ICF_SYNDROM_DN	EHRLICH_ICF_SYNDROM_DN	SET	12	0.60773	0.015176	0.22856	0.0039232
EUR	auto_RNFL_q6		TRUE	EHRLICH_ICF_SYNDROM_UP	EHRLICH_ICF_SYNDROM_UP	SET	11	0.71345	0.017058	0.25745	0.0027958
EUR	autoc_GCC_q2		TRUE	EINAV_INTERFERON_SIGNATURE_IN_CANCER	EINAV_INTERFERON_SIGNATURE_I...	SET	27	0.29293	0.010968	0.15444	0.028944
EUR	auto_GCC_q8		TRUE	ENK_UV_RESPONSE_KERATINOCYTE_UP	ENK_UV_RESPONSE_KERATINOCYTE...2	SET	500	0.094527	0.015042	0.038431	0.0069597
EUR	autoc_GCC_q2		TRUE	EPPERT_CE_HSC_LSC	EPPERT_CE_HSC_LSC	SET	38	0.33802	0.015011	0.13126	0.0050149
EUR	auto_RNFL_q6		TRUE	EPPERT_CE_HSC_LSC	EPPERT_CE_HSC_LSC	SET	38	0.29622	0.013154	0.131	0.011881
EUR	auto_RNFL_q8		TRUE	EPPERT_PROGENITOR	EPPERT_PROGENITOR	SET	132	0.19334	0.015962	0.067781	0.0021729
EUR	auto_GCC_q6		TRUE	FLECHNER_PBL_KIDNEY_TRANSPLANT_OK_VS_DONOR_DN	FLECHNER_PBL_KIDNEY_TRANSPLA...1	SET	39	0.40863	0.018383	0.13145	0.00094179
EUR	auto_RNFL_q7		TRUE	FLECHNER_PBL_KIDNEY_TRANSPLANT_OK_VS_DONOR_DN	FLECHNER_PBL_KIDNEY_TRANSPLA...1	SET	39	0.35764	0.016089	0.12935	0.0028505
EUR	moco_GCC_q3		TRUE	FOURNIER_ACINAR_DEVELOPMENT_EARLY_DN	FOURNIER_ACINAR_DEVELOPMENT_...1	SET	6	0.92875	0.016402	0.28771	0.00062472
EUR	autoc_GCC_q2		TRUE	FRASOR_TAMOXIFEN_RESPONSE_UP	FRASOR_TAMOXIFEN_RESPONSE_UP	SET	45	0.34323	0.016583	0.11798	0.0018152
EUR	auto_GCC_q6		TRUE	GHANDHI_BYSTANDER_IRRADIATION_DN	GHANDHI_BYSTANDER_IRRADIATIO...1	SET	11	0.78041	0.018659	0.28724	0.003299
EUR	auto_GCC_q8		TRUE	GLASS_IGF2BP1_CLIP_TARGETS_KNOCKDOWN_DN	GLASS_IGF2BP1_CLIP_TARGETS_K...	SET	114	0.1681	0.012904	0.079869	0.017665
EUR	moco_GCC_q8		TRUE	GYORFFY_DOXORUBICIN_RESISTANCE	GYORFFY_DOXORUBICIN_RESISTAN...	SET	35	0.35094	0.014958	0.14293	0.0070428
EUR	autoc_GCC_q2		TRUE	HIRSCH_CELLULAR_TRANSFORMATION_SIGNATURE_UP	HIRSCH_CELLULAR_TRANSFORMATI...2	SET	237	0.14017	0.015464	0.054668	0.0051794
EUR	moco_RNFL_q5		TRUE	IBRAHIM_NRF3_UP	IBRAHIM_NRF3_UP	SET	5	1.4212	0.022912	0.55557	0.0052692
EUR	auto_GCC_q6		TRUE	IKEDA_MIR133_TARGETS_UP	IKEDA_MIR133_TARGETS_UP	SET	41	0.30579	0.014104	0.1252	0.0073004
EUR	auto_RNFL_q7		TRUE	IM_SREBF1A_TARGETS	IM_SREBF1A_TARGETS	SET	5	0.8057	0.012989	0.37581	0.016031
EUR	auto_RNFL_q8		TRUE	IYENGAR_RESPONSE_TO_ADIPOCYTE_FACTORS	IYENGAR_RESPONSE_TO_ADIPOCYT...	SET	10	0.52511	0.011971	0.25293	0.018951
EUR	auto_RNFL_q1		TRUE	IZADPANAH_STEM_CELL_ADIPOSE_VS_BONE_DN	IZADPANAH_STEM_CELL_ADIPOSE_...1	SET	103	0.30183	0.022029	0.076928	4.3851e-05
EUR	auto_GCC_q8		TRUE	JECHLINGER_EPITHELIAL_TO_MESENCHYMAL_TRANSITION_DN	JECHLINGER_EPITHELIAL_TO_MES...1	SET	60	0.24652	0.013748	0.096941	0.0055007
EUR	auto_GCC_q8		TRUE	JEON_SMAD6_TARGETS_UP	JEON_SMAD6_TARGETS_UP	SET	24	0.41261	0.014567	0.17682	0.0098182
EUR	moco_GCC_q3		TRUE	JU_AGING_TERC_TARGETS_UP	JU_AGING_TERC_TARGETS_UP	SET	6	0.7074	0.012493	0.37346	0.029111
EUR	moco_GCC_q8		TRUE	JU_AGING_TERC_TARGETS_UP	JU_AGING_TERC_TARGETS_UP	SET	6	0.64104	0.011321	0.36817	0.040841
EUR	auto_GCC_q6		TRUE	KEGG_CALCIUM_SIGNALING_PATHWAY	KEGG_CALCIUM_SIGNALING_PATHW...	SET	167	0.22548	0.02092	0.063639	0.0001984
EUR	moco_RNFL_q1		TRUE	KHETCHOUMIAN_TRIM24_TARGETS_UP	KHETCHOUMIAN_TRIM24_TARGETS_...2	SET	44	0.3669	0.017529	0.11921	0.0010449
EUR	auto_RNFL_q8		TRUE	KOINUMA_TARGETS_OF_SMAD2_OR_SMAD3	KOINUMA_TARGETS_OF_SMAD2_OR_...	SET	809	0.097427	0.019557	0.028934	0.00038076
EUR	moco_RNFL_q5		TRUE	KOMMAGANI_TP63_GAMMA_TARGETS	KOMMAGANI_TP63_GAMMA_TARGETS	SET	9	0.87543	0.018933	0.26161	0.00041059
EUR	auto_RNFL_q1		TRUE	KOYAMA_SEMA3B_TARGETS_UP	KOYAMA_SEMA3B_TARGETS_UP	SET	232	0.16739	0.018274	0.052856	0.00077209
EUR	autoc_GCC_q2		TRUE	KUWANO_RNA_STABILIZED_BY_NO	KUWANO_RNA_STABILIZED_BY_NO	SET	7	0.98221	0.018735	0.3412	0.0019996
EUR	auto_GCC_q6		TRUE	LU_EZH2_TARGETS_UP	LU_EZH2_TARGETS_UP	SET	267	0.15174	0.017755	0.05225	0.0018443
EUR	auto_RNFL_q7		TRUE	MCCLUNG_DELTA_FOSB_TARGETS_8WK	MCCLUNG_DELTA_FOSB_TARGETS_8...	SET	46	0.35699	0.017438	0.11785	0.0012279
EUR	moco_RNFL_q1		TRUE	NEWMAN_ERCC6_TARGETS_DN	NEWMAN_ERCC6_TARGETS_DN	SET	36	0.33937	0.014669	0.12984	0.0044813
EUR	auto_RNFL_q0		TRUE	NEWMAN_ERCC6_TARGETS_DN	NEWMAN_ERCC6_TARGETS_DN	SET	36	0.32236	0.013934	0.12745	0.0057192
EUR	auto_GCC_q8		TRUE	NIKOLSKY_BREAST_CANCER_17Q21_Q25_AMPLICON	NIKOLSKY_BREAST_CANCER_17Q21...	SET	329	0.26203	0.033977	0.085493	0.0010908
EUR	auto_GCC_q8		TRUE	OISHI_CHOLANGIOMA_STEM_CELL_LIKE_UP	OISHI_CHOLANGIOMA_STEM_CELL_...2	SET	334	0.093827	0.012257	0.046394	0.021577
EUR	moco_GCC_q3		TRUE	OLSSON_E2F3_TARGETS_UP	OLSSON_E2F3_TARGETS_UP	SET	25	0.34106	0.012289	0.17106	0.023099
EUR	auto_GCC_q6		TRUE	PID_VEGFR1_2_PATHWAY	PID_VEGFR1_2_PATHWAY	SET	69	0.41997	0.02511	0.10073	1.5376e-05
EUR	auto_RNFL_q7		TRUE	QI_PLASMACYTOMA_UP	QI_PLASMACYTOMA_UP	SET	244	0.13535	0.015148	0.052313	0.0048424
EUR	auto_GCC_q8		TRUE	QUINTENS_EMBRYONIC_BRAIN_RESPONSE_TO_IR	QUINTENS_EMBRYONIC_BRAIN_RES...	SET	80	0.15165	0.0097602	0.085817	0.038618
EUR	moco_GCC_q8		TRUE	RICKMAN_HEAD_AND_NECK_CANCER_D	RICKMAN_HEAD_AND_NECK_CANCER...4	SET	33	0.49862	0.020637	0.14289	0.00024257
EUR	auto_RNFL_q3		TRUE	RYAN_MANTLE_CELL_LYMPHOMA_NOTCH_DIRECT_UP	RYAN_MANTLE_CELL_LYMPHOMA_NO...	SET	147	0.14713	0.012814	0.069446	0.017071
EUR	moco_RNFL_q5		TRUE	SEAVEY_EPITHELIOID_HEMANGIOENDOTHELIOMA	SEAVEY_EPITHELIOID_HEMANGIOE...	SET	91	0.24027	0.016489	0.078962	0.0011738
EUR	auto_RNFL_q6		TRUE	SHARMA_PILOCYTIC_ASTROCYTOMA_LOCATION_UP	SHARMA_PILOCYTIC_ASTROCYTOMA...2	SET	27	0.45538	0.01705	0.14876	0.0011048
EUR	autoc_GCC_q2		TRUE	SLEBOS_HEAD_AND_NECK_CANCER_WITH_HPV_UP	SLEBOS_HEAD_AND_NECK_CANCER_...	SET	70	0.17359	0.010454	0.10417	0.047821
EUR	auto_GCC_q8		TRUE	SNIJDERS_AMPLIFIED_IN_HEAD_AND_NECK_TUMORS	SNIJDERS_AMPLIFIED_IN_HEAD_A...	SET	37	0.24342	0.010666	0.13195	0.032544
EUR	auto_GCC_q8		TRUE	STEIN_ESTROGEN_RESPONSE_NOT_VIA_ESRRA	STEIN_ESTROGEN_RESPONSE_NOT_...	SET	17	0.71689	0.021305	0.2251	0.00072606
EUR	auto_RNFL_q3		TRUE	TANAKA_METHYLATED_IN_ESOPHAGEAL_CARCINOMA	TANAKA_METHYLATED_IN_ESOPHAG...	SET	98	0.34074	0.024261	0.1042	0.00053878
EUR	auto_RNFL_q7		TRUE	TCGA_GLIOBLASTOMA_COPY_NUMBER_DN	TCGA_GLIOBLASTOMA_COPY_NUMBE...1	SET	29	0.46242	0.017943	0.18393	0.005973
EUR	moco_RNFL_q1		TRUE	TCGA_GLIOBLASTOMA_COPY_NUMBER_DN	TCGA_GLIOBLASTOMA_COPY_NUMBE...1	SET	29	0.46527	0.018054	0.19122	0.0074891
EUR	auto_RNFL_q3		TRUE	TING_SILENCED_BY_DICER	TING_SILENCED_BY_DICER	SET	29	0.54587	0.021181	0.15771	0.00026964
EUR	auto_RNFL_q1		TRUE	TSUNODA_CISPLATIN_RESISTANCE_UP	TSUNODA_CISPLATIN_RESISTANCE...2	SET	14	0.76048	0.020511	0.25129	0.00124
EUR	moco_RNFL_q1		TRUE	TSUTSUMI_FBXW8_TARGETS	TSUTSUMI_FBXW8_TARGETS	SET	8	0.81723	0.016664	0.28864	0.0023213
EUR	auto_RNFL_q0		TRUE	UZONYI_RESPONSE_TO_LEUKOTRIENE_AND_THROMBIN	UZONYI_RESPONSE_TO_LEUKOTRIE...	SET	36	0.24366	0.010532	0.14436	0.045733
EUR	auto_RNFL_q3		TRUE	VANTVEER_BREAST_CANCER_METASTASIS_UP	VANTVEER_BREAST_CANCER_METAS...2	SET	43	0.38373	0.018124	0.12503	0.0010753
EUR	moco_GCC_q3		TRUE	VILIMAS_NOTCH1_TARGETS_UP	VILIMAS_NOTCH1_TARGETS_UP	SET	50	0.29799	0.015175	0.1146	0.0046615
EUR	moco_RNFL_q1		TRUE	WEBER_METHYLATED_LCP_IN_FIBROBLAST_UP	WEBER_METHYLATED_LCP_IN_FIBR...2	SET	13	1.0547	0.027412	0.28895	0.0001316
EUR	moco_RNFL_q1		TRUE	WNT_SIGNALING	WNT_SIGNALING	SET	87	0.24925	0.016726	0.095621	0.0045767
EUR	auto_RNFL_q7		TRUE	WP_SARSCOV2_B117_VARIANT_ANTAGONISES_INNATE_IMMUNE_ACTIVATION	WP_SARSCOV2_B117_VARIANT_ANT...	SET	8	1.301	0.026529	0.28591	2.6997e-06
EUR	auto_RNFL_q0		TRUE	XIE_ST_HSC_S1PR3_OE_UP	XIE_ST_HSC_S1PR3_OE_UP	SET	181	0.14275	0.013783	0.060828	0.0094765
EUR	autoc_GCC_q2		TRUE	XU_AKT1_TARGETS_6HR	XU_AKT1_TARGETS_6HR	SET	26	0.39411	0.014481	0.13447	0.0016934
EUR	moco_GCC_q3		TRUE	YEGNASUBRAMANIAN_PROSTATE_CANCER	YEGNASUBRAMANIAN_PROSTATE_CA...	SET	107	0.17646	0.013125	0.081918	0.015626
EUR	auto_RNFL_q0		TRUE	YEMELYANOV_GR_TARGETS_DN	YEMELYANOV_GR_TARGETS_DN	SET	10	0.53948	0.012299	0.24348	0.013364
EUR	auto_RNFL_q6		TRUE	YU_MYC_TARGETS_UP	YU_MYC_TARGETS_UP	SET	43	0.26582	0.012555	0.11405	0.0098898
