# Supplementary material for: Deep-learning-derived glaucoma-related endophenotypes enable novel genome-wide genetic and functional discovery
Source: Research Square preprint supplement (doi:10.21203/rs.3.rs-8311177/v1), 2026-01-22
Supplement: Supplementary file 4 [file SI_File_2.xlsx]

## Sheet: Sheet1
EUR meta-analysis genome-wide significant LD depedent loci
population	trait	CHROM	POS	ID	REF	ALT	A1	TEST	OBS_CT	BETA	SE	T_STAT	P	A1.repl	TEST.repl	OBS_CT.repl	BETA.repl	SE.repl	T_STAT.repl	P.repl	Allele1	Allele2	Effect	StdErr	P-value	Bonferroni_corrected_P	Direction	HetISq	HetChiSq	HetDf	HetPVal	CHROM_b38	POS_b38
EUR	autoRNFL_q6	10	70023053	rs10762198	A	G	A	ADD	26702	0.0862345	0.00977657	8.82053	1.20725e-18	A	ADD	8883	0.0923057	0.0170766	5.40541	6.63403e-08	a	g	-0.0877	0.0085	4.624e-25	9.7104e-24	--	0	0.095	1	0.7577	10	68263296
EUR	autoGCC_q3	17	79614932	17:79614932_TTAAC_T	TTAAC	T	TTAAC	ADD	26641	0.07496	0.00904797	8.28473	1.2388e-16	TTAAC	ADD	8853	0.0749376	0.0154862	4.83899	1.32711e-06	t	ttaac	0.075	0.0078	8.44e-22	1.7724e-20	++	0	0	1	0.999	17	81647906
EUR	autoGCC_q0	17	79614932	17:79614932_TTAAC_T	TTAAC	T	TTAAC	ADD	26641	0.0741041	0.00894124	8.2879	1.20632e-16	TTAAC	ADD	8853	0.0725144	0.0153384	4.72764	2.30656e-06	t	ttaac	0.0737	0.0077	1.414e-21	2.9694e-20	++	0	0.008	1	0.9287	17	81647906
EUR	autoRNFL_q3	10	70013250	rs3858146	C	T	T	ADD	26812	-0.0774748	0.00965676	-8.02286	1.07503e-15	T	ADD	8901	-0.0616381	0.0170134	-3.6229	0.000292938	t	c	-0.0736	0.0084	1.857e-18	3.8997e-17	--	0	0.655	1	0.4182	10	68253493
EUR	mocoRNFL_q1	10	70023053	rs10762198	A	G	A	ADD	26703	0.068719	0.00979171	7.01808	2.30317e-12	A	ADD	8882	0.0661908	0.0169413	3.90707	9.41172e-05	a	g	-0.0681	0.0085	9.644e-16	2.02524e-14	--	0	0.017	1	0.8972	10	68263296
EUR	autoGCC_q8	17	79614932	17:79614932_TTAAC_T	TTAAC	T	TTAAC	ADD	26641	-0.0628736	0.00900133	-6.98493	2.91704e-12	TTAAC	ADD	8853	-0.0599523	0.0156855	-3.82215	0.000133201	t	ttaac	-0.0621	0.0078	1.711e-15	3.5931e-14	--	0	0.026	1	0.8717	17	81647906
EUR	mocoRNFL_q9	10	70023053	rs10762198	A	G	A	ADD	26703	0.058772	0.00978971	6.00345	1.95661e-09	A	ADD	8882	0.0710006	0.0169713	4.18357	2.89729e-05	a	g	-0.0618	0.0085	3.084e-13	6.4764e-12	--	0	0.39	1	0.5325	10	68263296
EUR	autoRNFL_q1	8	109182244	rs7816434	T	C	C	ADD	26779	0.0641845	0.00986595	6.50566	7.8717e-11	C	ADD	8903	0.0504245	0.0171097	2.94713	0.00321574	t	c	-0.0608	0.0085	1.177e-12	2.4717e-11	--	0	0.485	1	0.486	8	108170015
EUR	mocoGCC_q3	10	70009389	rs4746749	C	T	C	ADD	26660	-0.0555125	0.0100643	-5.5158	3.50428e-08	C	ADD	8851	-0.0759735	0.017569	-4.3243	1.54697e-05	t	c	-0.0606	0.0087	4.046e-12	8.4966e-11	--	2.1	1.021	1	0.3122	10	68249632
EUR	autoRNFL_q3	14	61072875	rs10483727	T	C	T	ADD	26828	-0.0521964	0.00870857	-5.99369	2.07754e-09	T	ADD	8911	-0.0509777	0.0153796	-3.31463	0.000921323	t	c	0.0519	0.0076	7.446e-12	1.56366e-10	++	0	0.005	1	0.945	14	60606157
EUR	autoGCC_q3	17	79529750	rs72855624	G	A	A	ADD	26593	-0.0796861	0.0134328	-5.93222	3.02556e-09	A	ADD	8815	-0.0734529	0.0229293	-3.20345	0.00136274	a	g	-0.0781	0.0116	1.608e-11	3.3768e-10	--	0	0.055	1	0.8146	17	81562724
EUR	autoGCC_q4	17	79611271	rs62075722	A	G	A	ADD	26769	-0.0507367	0.00890702	-5.69626	1.23748e-08	A	ADD	8887	-0.0519334	0.0155796	-3.33343	0.00086133	a	g	0.051	0.0077	4.123e-11	8.6583e-10	++	0	0.004	1	0.9468	17	81644245
EUR	autoRNFL_q6	14	60807865	rs112115087	T	G	G	ADD	26000	0.0503683	0.00895406	5.62519	1.87213e-08	G	ADD	8648	0.0537205	0.0157291	3.41536	0.000639901	t	g	-0.0512	0.0078	4.761e-11	9.9981e-10	--	0	0.034	1	0.8531	14	60341147
EUR	autoRNFL_q3	20	14529084	rs199806394	G	A	G	ADD	26599	-0.0568396	0.00954308	-5.9561	2.61567e-09	G	ADD	8843	-0.0466516	0.0166559	-2.80092	0.00510687	a	g	-0.0543	0.0083	5.367e-11	1.12707e-09	--	0	0.282	1	0.5956	20	14548438
EUR	autoRNFL_q4	1	82379971	rs3790909	T	A	A	ADD	26517	-0.0440002	0.00891857	-4.93355	8.12369e-07	A	ADD	8791	-0.0664439	0.0154115	-4.31131	1.64061e-05	a	t	-0.0496	0.0077	1.28e-10	2.688e-09	--	37.1	1.589	1	0.2075	1	81914287
EUR	autoGCC_q6	17	79586227	17:79586227_TA_T	TA	T	TA	ADD	24805	-0.0458336	0.00911504	-5.02835	4.98167e-07	TA	ADD	8218	-0.059651	0.0157396	-3.78986	0.000151809	t	ta	-0.0493	0.0079	4.088e-10	8.5848e-09	--	0	0.577	1	0.4474	17	81619201
EUR	autoRNFL_q4	10	70023053	rs10762198	A	G	A	ADD	26702	0.0468356	0.00979589	4.78115	1.75227e-06	A	ADD	8883	0.0698829	0.0170275	4.10411	4.09502e-05	a	g	-0.0526	0.0085	5.984e-10	1.25664e-08	--	27.4	1.376	1	0.2407	10	68263296
EUR	autoGCC_q4	10	70040111	rs10762201	A	G	A	ADD	26725	-0.0554147	0.0100061	-5.53812	3.08613e-08	A	ADD	8876	-0.0448711	0.017573	-2.55341	0.0106841	a	g	0.0528	0.0087	1.232e-09	2.5872e-08	++	0	0.272	1	0.6021	10	68280354
EUR	autoGCC_q3	15	28230318	rs1800407	C	T	T	ADD	26828	0.0872961	0.0156665	5.57216	2.54019e-08	T	ADD	8911	0.067234	0.0268386	2.50513	0.0122585	t	c	0.0822	0.0135	1.239e-09	2.6019e-08	++	0	0.417	1	0.5186	15	27985172
EUR	autoRNFL_q8	10	70041583	rs4745956	C	T	C	ADD	26718	-0.0487825	0.0100227	-4.86721	1.13829e-06	C	ADD	8881	-0.0653773	0.0178473	-3.66316	0.000250575	t	c	-0.0528	0.0087	1.566e-09	3.2886e-08	--					10	68281826
EUR	autoGCC_q2	1	82379971	rs3790909	T	A	A	ADD	26495	0.0480535	0.00894822	5.37018	7.93211e-08	A	ADD	8813	0.0418572	0.0154618	2.70714	0.00679959	a	t	0.0465	0.0077	1.926e-09	4.0446e-08	++	0	0.12	1	0.7287	1	81914287
EUR	autoRNFL_q7	20	14536862	rs4814312	T	C	C	ADD	26798	-0.0517425	0.00966786	-5.35201	8.76962e-08	C	ADD	8903	-0.0420016	0.0167042	-2.51443	0.0119399	t	c	0.0493	0.0084	3.823e-09	8.0283e-08	++	0	0.255	1	0.6138	20	14556216
EUR	autoGCC_q2	14	60976537	rs33912345	C	A	C	ADD	26828	-0.0451486	0.00884761	-5.10292	3.36736e-07	C	ADD	8911	-0.0441275	0.0153346	-2.87764	0.00401616	a	c	-0.0449	0.0077	4.682e-09	9.8322e-08	--	0	0.003	1	0.954	14	60509819
EUR	autoGCC_q0	17	79529287	rs11150797	G	A	A	ADD	26542	-0.0706848	0.0133037	-5.31318	1.08596e-07	A	ADD	8805	-0.0558732	0.0227589	-2.455	0.0141077	a	g	-0.0669	0.0115	5.681e-09	1.19301e-07	--	0	0.316	1	0.5742	17	81562261
EUR	mocoGCC_q3	17	79578287	rs112364254	G	A	A	ADD	26765	-0.046984	0.00895158	-5.24868	1.54364e-07	A	ADD	8891	-0.038736	0.0156319	-2.47801	0.0132301	a	g	-0.0449	0.0078	7.202e-09	1.51242e-07	--	0	0.21	1	0.647	17	81611261
EUR	mocoRNFL_q5	10	70014638	rs61854803	T	C	C	ADD	26792	-0.0471181	0.00982628	-4.79511	1.63455e-06	C	ADD	8899	-0.0548317	0.0171646	-3.19447	0.00140578	t	c	0.049	0.0085	9.002e-09	1.89042e-07	++	0	0.152	1	0.6965	10	68254881
EUR	autoGCC_q10	16	80430159	16:80430159_CG_C	CG	C	C	ADD	26741	-0.158292	0.0354212	-4.46885	7.89634e-06	C	ADD	8876	-0.22347	0.060051	-3.72134	0.000199393	cg	c	0.1751	0.0305	9.48e-09	1.9908e-07	++	0	0.874	1	0.3499	16	80396262
EUR	autoGCC_q8	17	79529750	rs72855624	G	A	A	ADD	26593	0.0686816	0.0133629	5.13971	2.77106e-07	A	ADD	8815	0.0593003	0.0232273	2.55304	0.0106955	a	g	0.0663	0.0116	1.015e-08	2.1315e-07	++	0	0.123	1	0.7263	17	81562724
EUR	autoRNFL_q3	8	109292092	rs6469169	C	T	T	ADD	26757	-0.0515938	0.0099272	-5.19721	2.03784e-07	T	ADD	8881	-0.0414557	0.0173917	-2.38365	0.017163	t	c	-0.0491	0.0086	1.231e-08	2.5851e-07	--	0	0.256	1	0.6127	8	108279863
EUR	autoGCC_q2	14	59737100	rs35045925	G	A	A	ADD	26608	-0.0653412	0.011725	-5.57281	2.53087e-08	A	ADD	8846	-0.0343208	0.0204744	-1.67627	0.0937201	a	g	-0.0577	0.0102	1.436e-08	3.0156e-07	--	42.1	1.729	1	0.1886	14	59270382
EUR	mocoGCC_q8	1	20140340	rs3767216	A	G	G	ADD	26828	0.0454508	0.00914235	4.97146	6.68593e-07	G	ADD	8911	0.0433386	0.0159597	2.7155	0.00663038	a	g	-0.0449	0.0079	1.482e-08	3.1122e-07	--	0	0.013	1	0.9086	1	19813847
EUR	autoRNFL_q1	10	70014140	rs10823166	T	C	C	ADD	26804	0.0437684	0.00975923	4.48482	7.3277e-06	C	ADD	8902	0.0607513	0.017041	3.56501	0.000365748	t	c	-0.048	0.0085	1.483e-08	3.1143e-07	--	0	0.748	1	0.3871	10	68254383
EUR	autoGCC_q8	3	193811184	rs10933712	G	A	A	ADD	26781	0.0813894	0.0156073	5.21481	1.85368e-07	A	ADD	8898	0.0617403	0.0275635	2.23993	0.02512	a	g	0.0766	0.0136	1.685e-08	3.5385e-07	++	0	0.385	1	0.535	3	194093395
EUR	autoGCC_q6	2	145315140	2:145315140_GGTGT_G	GGTGT	G	G	ADD	23655	-0.0495555	0.00930558	-5.32535	1.01679e-07	G	ADD	7910	-0.032514	0.016008	-2.03111	0.0422773	g	ggtgt	-0.0453	0.008	1.858e-08	3.9018e-07	--	0	0.847	1	0.3574	2	144557573
EUR	mocoRNFL_q7	2	172595613	rs137902140	T	TG	T	ADD	21470	-0.0519475	0.0100689	-5.15918	2.50238e-07	T	ADD	7180	-0.0406496	0.0176969	-2.297	0.0216477	t	tg	0.0492	0.0088	1.908e-08	4.0068e-07	++	0	0.308	1	0.579	2	171739103
EUR	mocoRNFL_q3	10	12748816	rs4750249	C	T	C	ADD	26392	0.0526459	0.0103903	5.06683	4.0722e-07	C	ADD	8760	0.0445873	0.0181483	2.45683	0.0140361	t	c	0.0507	0.009	1.933e-08	4.0593e-07	++	0	0.148	1	0.7	10	12706817
EUR	autoGCC_q10	1	82479318	rs17472472	T	C	C	ADD	26687	0.0397802	0.00882623	4.50704	6.60176e-06	C	ADD	8874	0.0525246	0.0153546	3.42076	0.000627275	t	c	-0.0429	0.0077	1.997e-08	4.1937e-07	--	0	0.518	1	0.4718	1	82013634
EUR	autoGCC_q8	10	70040111	rs10762201	A	G	A	ADD	26725	-0.0499307	0.0101209	-4.93341	8.12938e-07	A	ADD	8876	-0.047266	0.017675	-2.67418	0.00750502	a	g	0.0493	0.0088	2.023e-08	4.2483e-07	++	0	0.017	1	0.8959	10	68280354
EUR	mocoRNFL_q1	14	61072658	rs28711886	G	A	G	ADD	25779	0.0397149	0.00942573	4.21346	2.52347e-05	G	ADD	8552	0.063473	0.0163891	3.87287	0.000108363	a	g	0.0456	0.0082	2.36e-08	4.956e-07	++	36.7	1.579	1	0.2089	14	60605940
EUR	autoGCC_q4	15	28230318	rs1800407	C	T	T	ADD	26828	-0.0750493	0.0153975	-4.87413	1.09911e-06	T	ADD	8911	-0.0729484	0.0270121	-2.70058	0.00693493	t	c	-0.0745	0.0134	2.52e-08	5.292e-07	--	0	0.005	1	0.9461	15	27985172
EUR	autoGCC_q8	16	8716128	rs72766456	A	G	G	ADD	26648	0.0702715	0.0135909	5.17049	2.35173e-07	G	ADD	8847	0.0496123	0.0241169	2.05716	0.0397	a	g	-0.0653	0.0118	3.499e-08	7.3479e-07	--	0	0.557	1	0.4555	16	8622271
EUR	autoRNFL_q0	2	174825725	rs62172787	A	G	G	ADD	26630	0.150471	0.0292328	5.14732	2.66118e-07	G	ADD	8865	0.100482	0.0493364	2.03667	0.041713	a	g	-0.1375	0.0251	4.589e-08	9.6369e-07	--	0	0.76	1	0.3834	2	173960997
EUR	autoRNFL_q8	14	61108825	rs35320790	C	A	C	ADD	26735	-0.0390386	0.00871291	-4.48055	7.47602e-06	C	ADD	8871	-0.0495047	0.0155719	-3.1791	0.00148241	a	c	-0.0415	0.0076	4.697e-08	9.8637e-07	--					14	60642107
EUR	mocoRNFL_q1	8	109194601	8:109194601_CA_C	CA	C	C	ADD	25122	0.0441061	0.0101878	4.32932	1.50146e-05	C	ADD	8319	0.0609996	0.0177765	3.43147	0.000603249	ca	c	-0.0483	0.0088	4.697e-08	9.8637e-07	--	0	0.68	1	0.4096	8	108182372
EUR	autoRNFL_q1	2	159748073	rs56186450	T	C	C	ADD	25745	-0.0483507	0.00957846	-5.04785	4.49843e-07	C	ADD	8588	-0.0361628	0.016644	-2.17272	0.0298289	t	c	0.0453	0.0083	4.793e-08	1.00653e-06	++	0	0.403	1	0.5256	2	158891561
Cross-ancestry meta-analysis genome-wide significant LD depedent loci
population	trait	ID	Allele1	Allele2	Effect	StdErr	P-value	Bonfferoni_corrected_P	Direction	HetISq	HetChiSq	HetDf	HetPVal	CHROM	POS
Cross-ancestry	auto_RNFL_q6_all1	rs3740587	a	g	0.0822	0.008	1.105e-24	2.3205e-23	++++++	33.3	7.494	5	0.1864	10	70020802
Cross-ancestry	auto_GCC_q3_all1	17:79614932_TTAAC_T	t	ttaac	0.0722	0.0076	2.368e-21	4.9728e-20	-+++++	0.2	5.012	5	0.4144	17	79614932
Cross-ancestry	auto_GCC_q0_all1	17:79614932_TTAAC_T	t	ttaac	0.0704	0.0075	9.928e-21	2.08488e-19	-+++++	13.3	5.764	5	0.3299	17	79614932
Cross-ancestry	auto_RNFL_q3_all1	rs3740587	a	g	-0.07	0.008	3.501e-18	7.3521e-17	-+----	23.7	6.552	5	0.2562	10	70020802
Cross-ancestry	auto_GCC_q8_all1	17:79614932_TTAAC_T	t	ttaac	-0.0599	0.0076	3.601e-15	7.5621e-14	+----+	0	3.868	5	0.5686	17	79614932
Cross-ancestry	moco_RNFL_q1_all1	rs61854803	t	c	-0.0626	0.008	4.341e-15	9.1161e-14	+----+	41.3	8.514	5	0.1301	10	70014638
Cross-ancestry	auto_RNFL_q1_all1	rs7816434	t	c	-0.0566	0.008	1.688e-12	3.5448e-11	-+----	57.9	11.887	5	0.03637	8	109182244
Cross-ancestry	moco_RNFL_q9_all1	rs10823166	t	c	-0.0559	0.008	3.333e-12	6.9993e-11	----++	33.7	7.546	5	0.1831	10	70014140
Cross-ancestry	auto_RNFL_q3_all1	rs6042789	t	g	-0.053	0.0077	5.298e-12	1.11258e-10	------	0	4.373	5	0.4971	20	14536808
Cross-ancestry	auto_GCC_q2_all1	rs12074133	a	t	-0.0498	0.0074	1.351e-11	2.8371e-10	------	3.5	5.181	5	0.3942	1	82385309
Cross-ancestry	moco_GCC_q3_all1	rs4745956	t	c	-0.0559	0.0083	1.691e-11	3.5511e-10	-----+	6.5	5.35	5	0.3746	10	70041583
Cross-ancestry	auto_RNFL_q4_all1	rs12074133	a	t	0.0492	0.0073	2.127e-11	4.4667e-10	++++++	0	4.59	5	0.468	1	82385309
Cross-ancestry	auto_GCC_q3_all1	rs72855624	a	g	-0.0732	0.011	2.32e-11	4.872e-10	-----+	0	3.594	5	0.6092	17	79529750
Cross-ancestry	auto_GCC_q4_all1	rs62075722	a	g	0.0504	0.0076	2.573e-11	5.4033e-10	++++++	0	0.428	5	0.9945	17	79611271
Cross-ancestry	moco_RNFL_q1_all1	rs4635359	a	c	0.0526	0.0081	9.815e-11	2.06115e-09	++++++	49.2	9.847	5	0.07969	16	80537760
Cross-ancestry	auto_RNFL_q6_all1	rs28711886	a	g	0.0491	0.0077	1.904e-10	3.9984e-09	+-++++	17.8	6.082	5	0.2983	14	61072658
Cross-ancestry	moco_RNFL_q9_all1	rs4635359	a	c	0.0518	0.0082	2.118e-10	4.4478e-09	++++++	61.9	13.138	5	0.02212	16	80537760
Cross-ancestry	auto_GCC_q6_all1	rs561130827	t	taa	0.0486	0.0077	2.946e-10	6.1866e-09	++++++	0	2.647	5	0.7543	17	79602383
Cross-ancestry	auto_GCC_q4_all1	rs4745956	t	c	-0.051	0.0082	6.2e-10	1.302e-08	-+---+	0	1.748	5	0.8828	10	70041583
Cross-ancestry	auto_RNFL_q7_all1	rs4814312	t	c	0.0496	0.0081	8.527e-10	1.79067e-08	++++++	0	0.812	5	0.9763	20	14536862
Cross-ancestry	moco_RNFL_q1_all1	14:60902199_GT_G	g	gt	0.0499	0.0082	8.98e-10	1.8858e-08	+-++++	19.2	6.186	5	0.2886	14	60902199
Cross-ancestry	moco_GCC_q3_all1	17:79614932_TTAAC_T	t	ttaac	-0.0465	0.0076	9.616e-10	2.01936e-08	+-----	6.3	5.334	5	0.3765	17	79614932
Cross-ancestry	auto_GCC_q3_all1	rs1800407	t	c	0.0816	0.0134	1.14e-09	2.394e-08	??+++-	0	1.678	3	0.6419	15	28230318
Cross-ancestry	auto_RNFL_q3_all1	rs28711886	a	g	-0.0466	0.0077	1.81e-09	3.801e-08	++----	43.2	8.809	5	0.1169	14	61072658
Cross-ancestry	auto_GCC_q2_all1	rs12884199	c	g	-0.0588	0.0098	1.856e-09	3.8976e-08	+-----	0	2.713	5	0.7441	14	59734872
Cross-ancestry	auto_RNFL_q4_all1	rs3740587	a	g	0.0478	0.008	1.894e-09	3.9774e-08	++++-+	31.9	7.34	5	0.1965	10	70020802
Cross-ancestry	moco_RNFL_q5_all1	10:69971810_TAG_T	t	tag	-0.0566	0.0094	2.061e-09	4.3281e-08	-----+	0	4.75	5	0.4471	10	69971810
Cross-ancestry	auto_RNFL_q4_all1	rs72725929	t	c	-0.065	0.0108	2.105e-09	4.4205e-08	------	45.8	9.219	5	0.1006	14	74536731
Cross-ancestry	auto_GCC_q10_all1	rs3790912	t	c	0.0436	0.0073	2.194e-09	4.6074e-08	+-++++	0	4.407	5	0.4924	1	82377091
Cross-ancestry	auto_GCC_q0_all1	rs72855624	a	g	-0.0648	0.0109	2.634e-09	5.5314e-08	-----+	0	2.062	5	0.8405	17	79529750
Cross-ancestry	auto_GCC_q8_all1	rs61416912	t	g	-0.075	0.0127	3.058e-09	6.4218e-08	----+-	0	4.463	5	0.4849	3	193810672
Cross-ancestry	auto_RNFL_q8_all1	10:69971810_TAG_T	t	tag	-0.0559	0.0094	3.14e-09	6.594e-08	------	0	0.802	5	0.9769	10	69971810
Cross-ancestry	moco_RNFL_q1_all1	rs141927261	g	ga	0.0661	0.0112	3.321e-09	6.9741e-08	++++++	0	1.724	5	0.8859	14	74615444
Cross-ancestry	moco_RNFL_q1_all1	8:109194601_CA_C	ca	c	-0.0498	0.0085	4.748e-09	9.9708e-08	------	0	1.112	5	0.9531	8	109194601
Cross-ancestry	auto_GCC_q8_all1	rs58935441	t	c	0.0489	0.0084	5.287e-09	1.11027e-07	+-++++	31.7	7.318	5	0.1981	7	51011995
Cross-ancestry	auto_GCC_q8_all1	rs4745956	t	c	-0.0485	0.0083	5.301e-09	1.11321e-07	------	0	0.934	5	0.9677	10	70041583
Cross-ancestry	auto_RNFL_q3_all1	rs6469169	t	c	-0.0476	0.0082	7.242e-09	1.52082e-07	----+-	27.4	6.886	5	0.2293	8	109292092
Cross-ancestry	auto_GCC_q10_all1	16:80430159_CG_C	cg	c	0.1704	0.0295	7.313e-09	1.53573e-07	??+++-	0	1.707	3	0.6354	16	80430159
Cross-ancestry	auto_GCC_q4_all1	rs4327428	a	c	-0.0632	0.0109	7.506e-09	1.57626e-07	-+----	33.2	7.488	5	0.1868	3	45809329
Cross-ancestry	moco_GCC_q8_all1	rs3767216	a	g	-0.0437	0.0076	8.66e-09	1.8186e-07	-+---+	12.3	5.703	5	0.3363	1	20140340
Cross-ancestry	auto_GCC_q0_all1	rs11377419	t	tg	0.0492	0.0086	1.047e-08	2.1987e-07	++++++	0	2.211	5	0.8192	8	74224239
Cross-ancestry	auto_GCC_q4_all1	rs56834952	a	g	0.0679	0.0119	1.139e-08	2.3919e-07	++++++	0.9	5.044	5	0.4105	4	148892092
Cross-ancestry	auto_RNFL_q1_all1	rs45569432	t	c	0.063	0.011	1.175e-08	2.4675e-07	++++++	37.9	8.049	5	0.1536	14	74666225
Cross-ancestry	auto_RNFL_q6_all1	rs7829106	t	c	0.046	0.0081	1.385e-08	2.9085e-07	++++++	0	4.015	5	0.5473	8	109294038
Cross-ancestry	auto_GCC_q8_all1	rs72855624	a	g	0.0622	0.011	1.391e-08	2.9211e-07	+++++-	0	2.887	5	0.7173	17	79529750
Cross-ancestry	auto_GCC_q2_all1	rs765853102	t	tg	-0.0434	0.0076	1.396e-08	2.9316e-07	------	0	0.887	5	0.9712	14	60964842
Cross-ancestry	auto_GCC_q0_all1	rs592381	a	g	-0.0426	0.0075	1.509e-08	3.1689e-07	------	0	3.137	5	0.6789	11	88617227
Cross-ancestry	auto_RNFL_q6_all1	1:161386627_AT_A	a	at	-0.2308	0.0408	1.6e-08	3.36e-07	------	0	4.703	5	0.4532	1	161386627
Cross-ancestry	moco_RNFL_q5_all1	14:60902199_GT_G	g	gt	-0.0459	0.0082	1.783e-08	3.7443e-07	-+----	41.1	8.49	5	0.1312	14	60902199
Cross-ancestry	auto_RNFL_q6_all1	14:61105917_AT_A	a	at	0.0564	0.01	1.833e-08	3.8493e-07	++++++	47.2	9.474	5	0.09159	14	61105917
Cross-ancestry	auto_RNFL_q4_all1	rs56834952	a	g	-0.0655	0.0116	1.882e-08	3.9522e-07	------	0	1.884	5	0.865	4	148892092
Cross-ancestry	auto_GCC_q3_all1	rs10933712	a	g	-0.0712	0.0127	1.919e-08	4.0299e-07	----+-	21.5	6.368	5	0.272	3	193811184
Cross-ancestry	moco_GCC_q8_all1	rs11728835	a	c	-0.091	0.0162	2.016e-08	4.2336e-07	------	0	3.979	5	0.5524	4	4362754
Cross-ancestry	moco_RNFL_q5_all1	rs3790905	a	c	-0.0434	0.0078	2.466e-08	5.1786e-07	------	53.7	10.789	5	0.05573	1	82382290
Cross-ancestry	auto_GCC_q10_all1	rs35045925	a	g	-0.0518	0.0093	2.91e-08	6.111e-07	------	0	3.96	5	0.5552	14	59737100
Cross-ancestry	auto_GCC_q4_all1	rs1800407	t	c	-0.0736	0.0133	2.953e-08	6.2013e-07	??---+	0	0.607	3	0.8948	15	28230318
Cross-ancestry	auto_RNFL_q1_all1	rs3740587	a	g	0.044	0.0079	3.04e-08	6.384e-07	++++-+	1.3	5.065	5	0.408	10	70020802
Cross-ancestry	auto_RNFL_q4_all1	rs7816434	t	c	-0.0444	0.008	3.125e-08	6.5625e-07	++----	0.8	5.04	5	0.4111	8	109182244
Cross-ancestry	auto_GCC_q6_all1	2:145315140_GGTGT_G	g	ggtgt	-0.0426	0.0077	3.559e-08	7.4739e-07	-+---+	0	2.897	5	0.7159	2	145315140
Cross-ancestry	moco_RNFL_q5_all1	rs45569432	t	c	-0.0613	0.0112	4.47e-08	9.387e-07	------	0	3.804	5	0.578	14	74666225
Cross-ancestry	auto_GCC_q4_all1	rs35854280	a	g	0.0432	0.0079	4.562e-08	9.5802e-07	++++++	26.2	6.775	5	0.2379	2	172575186
Cross-ancestry	auto_RNFL_q0_all1	rs62172787	a	g	-0.1375	0.0251	4.589e-08	9.6369e-07	??--??	0	0.76	1	0.3834	2	174825725
Cross-ancestry	auto_GCC_q4_all1	rs61416912	t	g	-0.0686	0.0126	4.867e-08	1.02207e-06	----+-	0	3.546	5	0.6164	3	193810672
AFR meta-analysis and ASN meta-analysis genome-wide significant LD depedent loci
Population	model_layer	phenotype	rsID	CHROM	POS	POS_b38	REF	ALT	A1	beta_s1	se_s1	p_s1	beta_s2	se_s2	p_s2	beta	se	p_meta	p_meta_bonferroni	ci.lower	ci.upper	I2	heterogeneity_p
AFR	mocoRNFL	q5	rs59502876	2	102162013	101545551	T	C	T	-0.165	0.037	1.14e-05	-0.267	0.062	2.24e-05	-0.192	0.032	2.08e-09	4.368e-08	-0.25472	-0.12928	49.1	0.16
AFR	autoGCC	q4	6:151934085_TCTTTGTTTG_T	6	151934085	151612950	TCTTTGTTTG	T	TCTTTGTTTG	0.218	0.045	1.3e-06	0.22	0.085	0.01	0.218	0.04	3.63e-08	7.623e-07	0.1396	0.2964	0	0.98
ASN	autoGCC	q2	rs10983433	9	119719068	116956789	C	T	T	-0.278	0.053	1.86e-07	-0.217	0.12	0.071	-0.268	0.048	3.26e-08	6.846e-07	-0.36208	-0.17392	0	0.64
ASN	autoGCC	q3	rs56870658	11	119030088	119159378	T	A	A	-0.185	0.038	1.18e-06	-0.191	0.068	0.00539	-0.186	0.033	1.82e-08	3.822e-07	-0.25068	-0.12132	0	0.94
AFR	autoRNFL	q6	rs12889133	14	75465089	74998386	C	T	T	-0.365	0.087	3.09e-05	-0.537	0.145	0.000234	-0.411	0.075	3.82e-08	8.022e-07	-0.558	-0.264	4	0.31
AFR	autoGCC	q2	rs8050079	16	54774483	54740571	G	T	G	0.301	0.059	3.37e-07	0.271	0.093	0.00365	0.293	0.05	3.71e-09	7.791e-08	0.195	0.391	0	0.78
ASN	mocoRNFL	q5	rs7188798	16	87005397	86971791	C	G	G	0.338	0.077	1.2e-05	0.45	0.125	0.000361	0.369	0.066	1.79e-08	3.759e-07	0.23964	0.49836	0	0.45
