# Supplementary material for: Deep-learning-derived glaucoma-related endophenotypes enable novel genome-wide genetic and functional discovery
Source: Research Square preprint supplement (doi:10.21203/rs.3.rs-8311177/v1), 2026-01-22
Supplement: Supplementary file 5 [file SI_File_4.xlsx]

## Sheet: Sheet1
ML-model_Layer	Endophenotype_sub-identifier	Discovery_GWAS_AFR	Discovery_GWAS_ASN	Discovery_GWAS_EUR	Replication_GWAS_AFR	Replication_GWAS_ASN	Replication_GWAS_EUR
AUTO_GCC	q0	1.004	1.008	1.012	1.001	1.007	1.007
AUTO_GCC	q10	1.003	1	1.012	1	1.001	1.009
AUTO_GCC	q2	1.01	1	1.005	1.002	1	1.014
AUTO_GCC	q3	1	1.009	1.019	1.006	1	1.007
AUTO_GCC	q4	1	1.001	1.035	1	1	1.015
AUTO_GCC	q6	1.012	1	1.013	1.02	1	1
AUTO_GCC	q8	1	1.004	1.022	1.003	1	1.013
AUTO_RNFL	q0	1	1	1.002	1.002	1.003	1
AUTO_RNFL	q1	1.004	1	1.02	1	1	1
AUTO_RNFL	q3	1.004	1.003	1.022	1.003	1	1.007
AUTO_RNFL	q4	1.011	1	1.012	1.006	1	1
AUTO_RNFL	q6	1.012	1.011	1.028	1.005	1	1
AUTO_RNFL	q7	1	1.007	1.01	1.001	1	1
AUTO_RNFL	q8	1	1.005	1.004	1	1	1
MOCO_GCC	q3	1.002	1.009	1.011	1.003	1.007	1.017
MOCO_GCC	q8	1	1.006	1	1	1	1.001
MOCO_RNFL	q1	1.002	1.001	1.028	1.013	1.014	1.007
MOCO_RNFL	q3	1.008	1	1	1	1	1.003
MOCO_RNFL	q5	1.006	1	1.015	1.003	1	1
MOCO_RNFL	q7	1.011	1	1	1.013	1.007	1
MOCO_RNFL	q9	1	1.004	1.017	1.002	1	1
