# Supplementary material for: Deep-learning-derived glaucoma-related endophenotypes enable novel genome-wide genetic and functional discovery
Source: Research Square preprint supplement (doi:10.21203/rs.3.rs-8311177/v1), 2026-01-22
Supplement: Supplementary file 6 [file SI_File_5.xlsx]

## Sheet: CA_reported_loci
Population	Trait	Locus	Previously-reported_locus	Associatied_trait
Cross-ancestry	autoGCC_q0	rs11377419	8:73317988	retinal layer thickness
Cross-ancestry	autoGCC_q0	rs11377419	8:73317988	retinal nerve fibre layer thickness
Cross-ancestry	autoGCC_q0	rs11377419	8:73317988	retinal layer thickness
Cross-ancestry	autoGCC_q0	rs592381	11:89296763	intraocular pressure measurement
Cross-ancestry	autoGCC_q10	rs3790912	1:81930280	retinal layer thickness
Cross-ancestry	autoGCC_q10	rs35045925	14:59252675	retinal layer thickness
Cross-ancestry	autoGCC_q10	rs35045925	14:59252675	retinal nerve fibre layer thickness
Cross-ancestry	autoGCC_q10	rs35045925	14:59252675	retinal layer thickness
Cross-ancestry	autoGCC_q10	rs35045925	14:59252675	retinal layer thickness
Cross-ancestry	autoGCC_q10	rs35045925	14:59252675	retinal layer thickness
Cross-ancestry	autoGCC_q2	rs12074133	1:81930280	retinal layer thickness
Cross-ancestry	autoGCC_q2	rs12884199	14:59252675	retinal layer thickness
Cross-ancestry	autoGCC_q2	rs12884199	14:59252675	retinal nerve fibre layer thickness
Cross-ancestry	autoGCC_q2	rs12884199	14:59252675	retinal layer thickness
Cross-ancestry	autoGCC_q2	rs12884199	14:59252675	retinal layer thickness
Cross-ancestry	autoGCC_q2	rs12884199	14:59252675	retinal layer thickness
Cross-ancestry	autoGCC_q2	rs765853102	14:60642107	glaucoma
Cross-ancestry	autoGCC_q3	rs1800407	15:27985172	macular thickness
Cross-ancestry	autoGCC_q3	rs1800407	15:27985172	retinal layer thickness
Cross-ancestry	autoGCC_q3	rs1800407	15:27985172	retinal nerve fibre layer thickness
Cross-ancestry	autoGCC_q3	rs1800407	15:27985172	retinal layer thickness
Cross-ancestry	autoGCC_q3	rs1800407	15:27985172	retinal layer thickness
Cross-ancestry	autoGCC_q3	rs1800407	15:27985172	retinal layer thickness
Cross-ancestry	autoGCC_q4	rs62075722	17:81616447	retinal layer thickness
Cross-ancestry	autoGCC_q4	rs62075722	17:81616447	retinal nerve fibre layer thickness
Cross-ancestry	autoGCC_q4	rs62075722	17:81616447	retinal layer thickness
Cross-ancestry	autoGCC_q4	rs4745956	10:68280354	retinal layer thickness
Cross-ancestry	autoGCC_q4	rs4745956	10:68280354	retinal nerve fibre layer thickness
Cross-ancestry	autoGCC_q4	rs4745956	10:68280354	retinal layer thickness
Cross-ancestry	autoGCC_q4	rs4327428	3:45772602	macular thickness
Cross-ancestry	autoGCC_q4	rs4327428	3:45772602	retinal layer thickness
Cross-ancestry	autoGCC_q4	rs4327428	3:45772602	retinal nerve fibre layer thickness
Cross-ancestry	autoGCC_q4	rs4327428	3:45772602	retinal layer thickness
Cross-ancestry	autoGCC_q4	rs4327428	3:45772602	retinal layer thickness
Cross-ancestry	autoGCC_q4	rs4327428	3:45772602	retinal layer thickness
Cross-ancestry	autoGCC_q4	rs1800407	15:27985172	macular thickness
Cross-ancestry	autoGCC_q4	rs1800407	15:27985172	retinal layer thickness
Cross-ancestry	autoGCC_q4	rs1800407	15:27985172	retinal nerve fibre layer thickness
Cross-ancestry	autoGCC_q4	rs1800407	15:27985172	retinal layer thickness
Cross-ancestry	autoGCC_q4	rs1800407	15:27985172	retinal layer thickness
Cross-ancestry	autoGCC_q4	rs1800407	15:27985172	retinal layer thickness
Cross-ancestry	autoGCC_q4	rs35854280	2:172021244	retinal layer thickness
Cross-ancestry	autoGCC_q6	rs561130827	17:81648542	macular thickness
Cross-ancestry	autoGCC_q6	rs561130827	17:81648542	intraocular pressure measurement
Cross-ancestry	autoGCC_q8	rs58935441	7:50897509	retinal layer thickness
Cross-ancestry	autoGCC_q8	rs4745956	10:68280354	retinal layer thickness
Cross-ancestry	autoGCC_q8	rs4745956	10:68280354	retinal nerve fibre layer thickness
Cross-ancestry	autoGCC_q8	rs4745956	10:68280354	retinal layer thickness
Cross-ancestry	autoRNFL_q1	rs7816434	8:108111790	retinal layer thickness
Cross-ancestry	autoRNFL_q1	rs45569432	14:74030935	retinal layer thickness
Cross-ancestry	autoRNFL_q1	rs3740587	10:68280354	retinal layer thickness
Cross-ancestry	autoRNFL_q1	rs3740587	10:68280354	retinal nerve fibre layer thickness
Cross-ancestry	autoRNFL_q1	rs3740587	10:68280354	retinal layer thickness
Cross-ancestry	autoRNFL_q3	rs3740587	10:68280354	retinal layer thickness
Cross-ancestry	autoRNFL_q3	rs3740587	10:68280354	retinal nerve fibre layer thickness
Cross-ancestry	autoRNFL_q3	rs3740587	10:68280354	retinal layer thickness
Cross-ancestry	autoRNFL_q3	rs6042789	20:14563980	retinal layer thickness
Cross-ancestry	autoRNFL_q3	rs28711886	14:60642107	glaucoma
Cross-ancestry	autoRNFL_q3	rs6469169	8:108111790	retinal layer thickness
Cross-ancestry	autoRNFL_q4	rs12074133	1:81930280	retinal layer thickness
Cross-ancestry	autoRNFL_q4	rs3740587	10:68280354	retinal layer thickness
Cross-ancestry	autoRNFL_q4	rs3740587	10:68280354	retinal nerve fibre layer thickness
Cross-ancestry	autoRNFL_q4	rs3740587	10:68280354	retinal layer thickness
Cross-ancestry	autoRNFL_q4	rs72725929	14:74030935	retinal layer thickness
Cross-ancestry	autoRNFL_q4	rs7816434	8:108111790	retinal layer thickness
Cross-ancestry	autoRNFL_q6	rs3740587	10:68280354	retinal layer thickness
Cross-ancestry	autoRNFL_q6	rs3740587	10:68280354	retinal nerve fibre layer thickness
Cross-ancestry	autoRNFL_q6	rs3740587	10:68280354	retinal layer thickness
Cross-ancestry	autoRNFL_q6	rs28711886	14:60642107	glaucoma
Cross-ancestry	autoRNFL_q6	rs7829106	8:108111790	retinal layer thickness
Cross-ancestry	autoRNFL_q7	rs4814312	20:14563980	retinal layer thickness
Cross-ancestry	mocoGCC_q3	rs4745956	10:68280354	retinal layer thickness
Cross-ancestry	mocoGCC_q3	rs4745956	10:68280354	retinal nerve fibre layer thickness
Cross-ancestry	mocoGCC_q3	rs4745956	10:68280354	retinal layer thickness
Cross-ancestry	mocoRNFL_q1	rs61854803	10:68280354	retinal layer thickness
Cross-ancestry	mocoRNFL_q1	rs61854803	10:68280354	retinal nerve fibre layer thickness
Cross-ancestry	mocoRNFL_q1	rs61854803	10:68280354	retinal layer thickness
Cross-ancestry	mocoRNFL_q1	rs4635359	16:80503863	macular thickness
Cross-ancestry	mocoRNFL_q1	rs4635359	16:80503863	retinal layer thickness
Cross-ancestry	mocoRNFL_q1	rs4635359	16:80503863	retinal layer thickness
Cross-ancestry	mocoRNFL_q5	rs3790905	1:81930280	retinal layer thickness
Cross-ancestry	mocoRNFL_q5	rs45569432	14:74030935	retinal layer thickness
Cross-ancestry	mocoRNFL_q9	rs10823166	10:68280354	retinal layer thickness
Cross-ancestry	mocoRNFL_q9	rs10823166	10:68280354	retinal nerve fibre layer thickness
Cross-ancestry	mocoRNFL_q9	rs10823166	10:68280354	retinal layer thickness
Cross-ancestry	mocoRNFL_q9	rs4635359	16:80503863	macular thickness
Cross-ancestry	mocoRNFL_q9	rs4635359	16:80503863	retinal layer thickness
Cross-ancestry	mocoRNFL_q9	rs4635359	16:80503863	retinal layer thickness
EUR	autoGCC_q10	rs17472472	1:81930280	retinal layer thickness
EUR	autoGCC_q2	rs3790909	1:81930280	retinal layer thickness
EUR	autoGCC_q2	rs33912345	14:60509819	POAG cross-ancestry
EUR	autoGCC_q2	rs33912345	14:60509819	POAG EUR
EUR	autoGCC_q2	rs33912345	14:60509819	glaucoma
EUR	autoGCC_q2	rs33912345	14:60509819	open-angle glaucoma
EUR	autoGCC_q2	rs33912345	14:60509819	open-angle glaucoma
EUR	autoGCC_q2	rs33912345	14:60509819	open-angle glaucoma
EUR	autoGCC_q2	rs33912345	14:60509819	drug use measurement, glaucoma
EUR	autoGCC_q2	rs33912345	14:60509819	glaucoma
EUR	autoGCC_q2	rs33912345	14:60509819	drug use measurement, glaucoma
EUR	autoGCC_q2	rs33912345	14:60509819	open-angle glaucoma
EUR	autoGCC_q2	rs33912345	14:60509819	open-angle glaucoma
EUR	autoGCC_q2	rs33912345	14:60509819	open-angle glaucoma
EUR	autoGCC_q2	rs33912345	14:60509819	open-angle glaucoma
EUR	autoGCC_q2	rs35045925	14:59252675	retinal layer thickness
EUR	autoGCC_q2	rs35045925	14:59252675	retinal nerve fibre layer thickness
EUR	autoGCC_q2	rs35045925	14:59252675	retinal layer thickness
EUR	autoGCC_q2	rs35045925	14:59252675	retinal layer thickness
EUR	autoGCC_q2	rs35045925	14:59252675	retinal layer thickness
EUR	autoGCC_q3	rs1800407	15:27985172	macular thickness
EUR	autoGCC_q3	rs1800407	15:27985172	retinal layer thickness
EUR	autoGCC_q3	rs1800407	15:27985172	retinal nerve fibre layer thickness
EUR	autoGCC_q3	rs1800407	15:27985172	retinal layer thickness
EUR	autoGCC_q3	rs1800407	15:27985172	retinal layer thickness
EUR	autoGCC_q3	rs1800407	15:27985172	retinal layer thickness
EUR	autoGCC_q4	rs62075722	17:81616447	retinal layer thickness
EUR	autoGCC_q4	rs62075722	17:81616447	retinal nerve fibre layer thickness
EUR	autoGCC_q4	rs62075722	17:81616447	retinal layer thickness
EUR	autoGCC_q4	rs10762201	10:68280354	retinal layer thickness
EUR	autoGCC_q4	rs10762201	10:68280354	retinal nerve fibre layer thickness
EUR	autoGCC_q4	rs10762201	10:68280354	retinal layer thickness
EUR	autoGCC_q4	rs1800407	15:27985172	macular thickness
EUR	autoGCC_q4	rs1800407	15:27985172	retinal layer thickness
EUR	autoGCC_q4	rs1800407	15:27985172	retinal nerve fibre layer thickness
EUR	autoGCC_q4	rs1800407	15:27985172	retinal layer thickness
EUR	autoGCC_q4	rs1800407	15:27985172	retinal layer thickness
EUR	autoGCC_q4	rs1800407	15:27985172	retinal layer thickness
EUR	autoGCC_q8	rs10762201	10:68280354	retinal layer thickness
EUR	autoGCC_q8	rs10762201	10:68280354	retinal nerve fibre layer thickness
EUR	autoGCC_q8	rs10762201	10:68280354	retinal layer thickness
EUR	autoRNFL_q1	rs7816434	8:108111790	retinal layer thickness
EUR	autoRNFL_q1	rs10823166	10:68280354	retinal layer thickness
EUR	autoRNFL_q1	rs10823166	10:68280354	retinal nerve fibre layer thickness
EUR	autoRNFL_q1	rs10823166	10:68280354	retinal layer thickness
EUR	autoRNFL_q1	rs56186450	2:159091962	retinal layer thickness
EUR	autoRNFL_q3	rs3858146	10:68280354	retinal layer thickness
EUR	autoRNFL_q3	rs3858146	10:68280354	retinal nerve fibre layer thickness
EUR	autoRNFL_q3	rs3858146	10:68280354	retinal layer thickness
EUR	autoRNFL_q3	rs10483727	14:60606157	open-angle glaucoma
EUR	autoRNFL_q3	rs10483727	14:60606157	open-angle glaucoma
EUR	autoRNFL_q3	rs10483727	14:60606157	open-angle glaucoma
EUR	autoRNFL_q3	rs199806394	20:14563980	retinal layer thickness
EUR	autoRNFL_q3	rs6469169	8:108111790	retinal layer thickness
EUR	autoRNFL_q4	rs3790909	1:81930280	retinal layer thickness
EUR	autoRNFL_q4	rs10762198	10:68280354	retinal layer thickness
EUR	autoRNFL_q4	rs10762198	10:68280354	retinal nerve fibre layer thickness
EUR	autoRNFL_q4	rs10762198	10:68280354	retinal layer thickness
EUR	autoRNFL_q6	rs10762198	10:68280354	retinal layer thickness
EUR	autoRNFL_q6	rs10762198	10:68280354	retinal nerve fibre layer thickness
EUR	autoRNFL_q6	rs10762198	10:68280354	retinal layer thickness
EUR	autoRNFL_q7	rs4814312	20:14563980	retinal layer thickness
EUR	autoRNFL_q8	rs4745956	10:68280354	retinal layer thickness
EUR	autoRNFL_q8	rs4745956	10:68280354	retinal nerve fibre layer thickness
EUR	autoRNFL_q8	rs4745956	10:68280354	retinal layer thickness
EUR	autoRNFL_q8	rs35320790	14:60642107	glaucoma
EUR	mocoGCC_q3	rs4746749	10:68280354	retinal layer thickness
EUR	mocoGCC_q3	rs4746749	10:68280354	retinal nerve fibre layer thickness
EUR	mocoGCC_q3	rs4746749	10:68280354	retinal layer thickness
EUR	mocoGCC_q3	rs112364254	17:81616447	retinal layer thickness
EUR	mocoGCC_q3	rs112364254	17:81616447	retinal nerve fibre layer thickness
EUR	mocoGCC_q3	rs112364254	17:81616447	retinal layer thickness
EUR	mocoRNFL_q1	rs10762198	10:68280354	retinal layer thickness
EUR	mocoRNFL_q1	rs10762198	10:68280354	retinal nerve fibre layer thickness
EUR	mocoRNFL_q1	rs10762198	10:68280354	retinal layer thickness
EUR	mocoRNFL_q1	rs28711886	14:60642107	glaucoma
EUR	mocoRNFL_q5	rs61854803	10:68280354	retinal layer thickness
EUR	mocoRNFL_q5	rs61854803	10:68280354	retinal nerve fibre layer thickness
EUR	mocoRNFL_q5	rs61854803	10:68280354	retinal layer thickness
EUR	mocoRNFL_q7	rs137902140	2:172021244	retinal layer thickness
EUR	mocoRNFL_q9	rs10762198	10:68280354	retinal layer thickness
EUR	mocoRNFL_q9	rs10762198	10:68280354	retinal nerve fibre layer thickness
EUR	mocoRNFL_q9	rs10762198	10:68280354	retinal layer thickness
