# Supplementary material for: Deep-learning-derived glaucoma-related endophenotypes enable novel genome-wide genetic and functional discovery
Source: Research Square preprint supplement (doi:10.21203/rs.3.rs-8311177/v1), 2026-01-22
Supplement: Supplementary file 7 [file SI_File_6.xlsx]

## Sheet: EUR_meta_combined_sig_genes
Trait	GENE	Symbol	P	CHR	START	STOP	NSNPS	NPARAM	N	ZSTAT
EUR_auto_GCC_q6	ENSG00000182446	NPLOC4	9.9661e-08	17	79473913	79665495	948	48	35739	5.2
EUR_auto_GCC_q6	ENSG00000185527	PDE6G	5.8707e-07	17	79567489	79680142	591	26	35739	4.86
EUR_auto_GCC_q6	ENSG00000204237	OXLD1	1.6572e-06	17	79582066	79683665	551	24	35739	4.6503
EUR_auto_GCC_q8	ENSG00000108187	PBLD	2.0984e-06	10	69992417	70142806	483	23	35739	4.6014
EUR_auto_GCC_q8	ENSG00000138347	MYPN	3.9663e-08	10	69815912	70021774	740	49	35739	5.3687
EUR_auto_GCC_q8	ENSG00000179774	ATOH7	2.9544e-08	10	69940386	70041871	457	29	35739	5.4215
EUR_auto_GCC_q8	ENSG00000182446	NPLOC4	2.8172e-13	17	79473913	79665495	948	48	35739	7.209
EUR_auto_GCC_q8	ENSG00000185298	CCDC137	6.3212e-09	17	79583394	79690934	550	23	35739	5.6908
EUR_auto_GCC_q8	ENSG00000185359	HGS	7.284e-08	17	79600356	79720168	493	32	35739	5.2579
EUR_auto_GCC_q8	ENSG00000185504	C17orf70	3.2335e-09	17	79456911	79570987	528	42	35739	5.8042
EUR_auto_GCC_q8	ENSG00000185527	PDE6G	8.8503e-10	17	79567489	79680142	591	26	35739	6.0176
EUR_auto_GCC_q8	ENSG00000186765	FSCN2	3.6276e-08	17	79445422	79554156	506	40	35739	5.3847
EUR_auto_GCC_q8	ENSG00000204237	OXLD1	2.8335e-09	17	79582066	79683665	551	24	35739	5.8263
EUR_auto_GCC_q8	ENSG00000214087	ARL16	1.3879e-08	17	79598204	79700954	501	26	35739	5.555
EUR_auto_RNFL_q1	ENSG00000104408	EIF3E	2.8608e-11	8	109163445	109497562	1097	29	35739	6.5508
EUR_auto_RNFL_q1	ENSG00000119711	ALDH6A1	1.5847e-06	14	74473553	74601196	509	23	35739	4.6595
EUR_auto_RNFL_q1	ENSG00000138347	MYPN	7.1297e-07	10	69815912	70021774	740	49	35739	4.8213
EUR_auto_RNFL_q1	ENSG00000147655	RSPO2	1.8234e-09	8	108861544	109145913	863	51	35739	5.8995
EUR_auto_RNFL_q1	ENSG00000179774	ATOH7	7.1668e-08	10	69940386	70041871	457	29	35739	5.2609
EUR_auto_RNFL_q1	ENSG00000205659	LIN52	7.7343e-07	14	74501499	74717936	842	40	35739	4.8051
EUR_auto_RNFL_q3	ENSG00000096746	HNRNPH3	7.5537e-10	10	70040931	70152948	309	17	35739	6.0432
EUR_auto_RNFL_q3	ENSG00000104408	EIF3E	6.459e-07	8	109163445	109497562	1097	29	35739	4.841
EUR_auto_RNFL_q3	ENSG00000108187	PBLD	3.5033e-13	10	69992417	70142806	483	23	35739	7.1793
EUR_auto_RNFL_q3	ENSG00000138346	DNA2	3.0186e-07	10	70123821	70281879	561	22	35739	4.99
EUR_auto_RNFL_q3	ENSG00000138347	MYPN	2.1679e-12	10	69815912	70021774	740	49	35739	6.9258
EUR_auto_RNFL_q3	ENSG00000172264	MACROD2	2.0203e-06	20	13926015	16083842	6736	422	35739	4.6093
EUR_auto_RNFL_q3	ENSG00000179008	C14orf39	1.9738e-07	14	60813187	61032261	484	19	35739	5.0715
EUR_auto_RNFL_q3	ENSG00000179774	ATOH7	9.9237e-13	10	69940386	70041871	457	29	35739	7.0356
EUR_auto_RNFL_q3	ENSG00000204130	RUFY2	3.6394e-08	10	70050864	70217051	469	24	35739	5.3841
EUR_auto_RNFL_q6	ENSG00000096746	HNRNPH3	1.0414e-12	10	70040931	70152948	309	17	35739	7.0288
EUR_auto_RNFL_q6	ENSG00000104408	EIF3E	1.0033e-07	8	109163445	109497562	1097	29	35739	5.1987
EUR_auto_RNFL_q6	ENSG00000108187	PBLD	6.8279e-14	10	69992417	70142806	483	23	35739	7.3996
EUR_auto_RNFL_q6	ENSG00000122912	SLC25A16	7.2474e-09	10	70187756	70337231	545	26	35739	5.6674
EUR_auto_RNFL_q6	ENSG00000126778	SIX1	2.5778e-06	14	61060133	61174977	200	17	35739	4.5584
EUR_auto_RNFL_q6	ENSG00000138346	DNA2	6.3302e-10	10	70123821	70281879	561	22	35739	6.0716
EUR_auto_RNFL_q6	ENSG00000138347	MYPN	1.7688e-12	10	69815912	70021774	740	49	35739	6.9545
EUR_auto_RNFL_q6	ENSG00000179008	C14orf39	1.9936e-09	14	60813187	61032261	484	19	35739	5.8847
EUR_auto_RNFL_q6	ENSG00000179774	ATOH7	1.5166e-13	10	69940386	70041871	457	29	35739	7.2929
EUR_auto_RNFL_q6	ENSG00000184302	SIX6	2.1342e-08	14	60925669	61029568	230	12	35739	5.4794
EUR_auto_RNFL_q6	ENSG00000204130	RUFY2	1.2548e-10	10	70050864	70217051	469	24	35739	6.3264
EUR_auto_RNFL_q8	ENSG00000108187	PBLD	2.1685e-07	10	69992417	70142806	483	23	35739	5.0535
EUR_auto_RNFL_q8	ENSG00000138347	MYPN	2.7764e-07	10	69815912	70021774	740	49	35739	5.0062
EUR_auto_RNFL_q8	ENSG00000179774	ATOH7	7.5201e-09	10	69940386	70041871	457	29	35739	5.6611
EUR_moco_GCC_q3	ENSG00000096746	HNRNPH3	1.0623e-07	10	70040931	70152948	309	17	35739	5.1881
EUR_moco_GCC_q3	ENSG00000108187	PBLD	1.0205e-09	10	69992417	70142806	483	23	35739	5.9945
EUR_moco_GCC_q3	ENSG00000138347	MYPN	1.007e-08	10	69815912	70021774	740	49	35739	5.6108
EUR_moco_GCC_q3	ENSG00000179774	ATOH7	2.393e-10	10	69940386	70041871	457	29	35739	6.226
EUR_moco_GCC_q3	ENSG00000204130	RUFY2	1.0617e-06	10	70050864	70217051	469	24	35739	4.7413
EUR_moco_RNFL_q1	ENSG00000096746	HNRNPH3	1.0765e-06	10	70040931	70152948	309	17	35739	4.7385
EUR_moco_RNFL_q1	ENSG00000108187	PBLD	6.5925e-10	10	69992417	70142806	483	23	35739	6.0651
EUR_moco_RNFL_q1	ENSG00000138347	MYPN	1.1503e-11	10	69815912	70021774	740	49	35739	6.6856
EUR_moco_RNFL_q1	ENSG00000179008	C14orf39	3.0565e-07	14	60813187	61032261	484	19	35739	4.9876
EUR_moco_RNFL_q1	ENSG00000179774	ATOH7	8.9595e-14	10	69940386	70041871	457	29	35739	7.3635
EUR_moco_RNFL_q5	ENSG00000108187	PBLD	1.6661e-06	10	69992417	70142806	483	23	35739	4.6492
EUR_moco_RNFL_q5	ENSG00000138347	MYPN	7.8048e-07	10	69815912	70021774	740	49	35739	4.8033
EUR_moco_RNFL_q5	ENSG00000179008	C14orf39	1.4241e-06	14	60813187	61032261	484	19	35739	4.6815
EUR_moco_RNFL_q5	ENSG00000179774	ATOH7	1.852e-08	10	69940386	70041871	457	29	35739	5.5044
