# Supplementary material for: Deep-learning-derived glaucoma-related endophenotypes enable novel genome-wide genetic and functional discovery
Source: Research Square preprint supplement (doi:10.21203/rs.3.rs-8311177/v1), 2026-01-22
Supplement: Supplementary file 8 [file SI_File_7.xlsx]

## Sheet: ECLIPSER_GTEx_Table1
ECLIPSER output Table 1 of EUR and cross-ancestry meta-analyses loci with GTEx tissues
GWAS_population	GWAS_Trait	GWAS_variant	GWAS_variant_aligned_to_REF_PANEL	GWAS_effect_allele	GWAS_other_allele	GWAS_rsID	GWAS_Odds_Ratio	GWAS_effect	ABS(GWAS_effect)	GWAS_p_value	LD_interval_start_(b38)	LD_interval_end_(b38)	LD_interval_size_(kb)	Number_variants_tested_in_defined_LD_interval_(r2_0.1_¬±_50kb)	QTL_Type	QTL_variant_ID	QTL_variant_ALT_(effect_allele)	QTL_rsID	Gene_ENS_ID	Gene_symbol	Gene_ID_intron_cluster	Tissue	QTL_pval_nominal	QTL_GWAS_p_value	QTL_slope_relative_ALT	QTL_se	GWAS_effect_relative_ALT	GWAS_se	QTL_GWAS_relative_direction_effect	eCAVIAR_prob_in_causal_set	CLPP	QTL_variant_signif_esQTL_FDR05	Pass_QC_QTL_FDR05_P1E04_GWAS_P5E02
EUR	autoRNFL_q4	chr10:68263296:A:G	chr10:68263296:A:G	a	g	10:68263296	0.948759	-0.0526	0.507797	5.984e-10	68098183	68868604	770.421	1001	eQTL	chr10_68280354_A_G_b38	a	chr10_68280354_A_G_b38	ENSG00000108187.15	PBLD		Brain_Putamen_basal_ganglia	7.36559e-18	1.011e-09	-0.507797	0.0506823	-0.0534	0.0087	SAME	0.222806	0.0169135	TRUE	TRUE
EUR	autoRNFL_q4	chr10:68263296:A:G	chr10:68263296:A:G	a	g	10:68263296	0.948759	-0.0526	0.507797	5.984e-10	68098183	68868604	770.421	1001	eQTL	chr10_68281826_C_T_b38	t	chr10_68281826_C_T_b38	ENSG00000108187.15	PBLD		Brain_Putamen_basal_ganglia	7.36559e-18	9.593e-10	-0.507797	0.0506823	0.0534	0.0087	OPPOSITE	0.222806	0.0169135	TRUE	TRUE
EUR	autoRNFL_q4	chr10:68263296:A:G	chr10:68263296:A:G	a	g	10:68263296	0.948759	-0.0526	0.502989	5.984e-10	68098183	68868604	770.421	1001	eQTL	chr10_68276805_C_T_b38	t	chr10_68276805_C_T_b38	ENSG00000108187.15	PBLD		Brain_Putamen_basal_ganglia	1.27108e-17	1.333e-09	0.502989	0.0506863	0.053	0.0087	SAME	0.170712	0.012959	TRUE	TRUE
EUR	autoRNFL_q4	chr10:68263296:A:G	chr10:68263296:A:G	a	g	10:68263296	0.948759	-0.0526	0.502989	5.984e-10	68098183	68868604	770.421	1001	eQTL	chr10_68278641_A_G_b38	a	chr10_68278641_A_G_b38	ENSG00000108187.15	PBLD		Brain_Putamen_basal_ganglia	1.27108e-17	1.77e-09	0.502989	0.0506863	-0.0526	0.0087	OPPOSITE	0.143119	0.0108644	TRUE	TRUE
EUR	autoRNFL_q4	chr10:68263296:A:G	chr10:68263296:A:G	a	g	10:68263296	0.948759	-0.0526	0.509245	5.984e-10	68098183	68868604	770.421	1001	eQTL	chr10_68284945_A_G_b38	a	chr10_68284945_A_G_b38	ENSG00000108187.15	PBLD		Brain_Putamen_basal_ganglia	4.26406e-18	2.861e-09	-0.509245	0.0503459	-0.0519	0.0087	SAME	0.134629	0.0102199	TRUE	TRUE
EUR	autoRNFL_q4	chr10:68263296:A:G	chr10:68263296:A:G	a	g	10:68263296	0.948759	-0.0526	0.381502	5.984e-10	68098183	68868604	770.421	1001	eQTL	chr10_68261045_G_A_b38	a	chr10_68261045_G_A_b38	ENSG00000179774.8	ATOH7		Artery_Aorta	2.91814e-08	7.684e-10	0.381502	0.0670683	0.0523	0.0085	SAME	0.37407	0.0309652	TRUE	TRUE
EUR	autoRNFL_q4	chr10:68263296:A:G	chr10:68263296:A:G	a	g	10:68263296	0.948759	-0.0526	0.386088	5.984e-10	68098183	68868604	770.421	1001	eQTL	chr10_68261741_A_G_b38	a	chr10_68261741_A_G_b38	ENSG00000179774.8	ATOH7		Artery_Aorta	2.61114e-08	6.633e-10	-0.386088	0.0676261	-0.0525	0.0085	SAME	0.236119	0.0195457	TRUE	TRUE
EUR	autoRNFL_q4	chr10:68263296:A:G	chr10:68263296:A:G	a	g	10:68263296	0.948759	-0.0526	0.380852	5.984e-10	68098183	68868604	770.421	1001	eQTL	chr10_68280354_A_G_b38	a	chr10_68280354_A_G_b38	ENSG00000108187.15	PBLD		Brain_Cerebellar_Hemisphere	4.50896e-07	1.011e-09	-0.380852	0.0718009	-0.0534	0.0087	SAME	0.322776	0.0106495	TRUE	TRUE
EUR	autoRNFL_q4	chr10:68263296:A:G	chr10:68263296:A:G	a	g	10:68263296	0.948759	-0.0526	0.380852	5.984e-10	68098183	68868604	770.421	1001	eQTL	chr10_68281826_C_T_b38	t	chr10_68281826_C_T_b38	ENSG00000108187.15	PBLD		Brain_Cerebellar_Hemisphere	4.50896e-07	9.593e-10	-0.380852	0.0718009	0.0534	0.0087	OPPOSITE	0.322776	0.0106495	TRUE	TRUE
EUR	autoRNFL_q4	chr10:68263296:A:G	chr10:68263296:A:G	a	g	10:68263296	0.948759	-0.0526	0.338581	5.984e-10	68098183	68868604	770.421	1001	eQTL	chr10_68232096_A_G_b38	a	chr10_68232096_A_G_b38	ENSG00000179774.8	ATOH7		Brain_Cerebellar_Hemisphere	3.99968e-06	8.842e-09	0.338581	0.0704117	-0.0498	0.0087	OPPOSITE	0.306365	0.0109644	TRUE	TRUE
EUR	autoRNFL_q4	chr10:68263296:A:G	chr10:68263296:A:G	a	g	10:68263296	0.948759	-0.0526	0.337305	5.984e-10	68098183	68868604	770.421	1001	eQTL	chr10_68261045_G_A_b38	a	chr10_68261045_G_A_b38	ENSG00000233590.1	RP11-153K11.3		Artery_Tibial	2.18951e-12	7.684e-10	0.337305	0.0468655	0.0523	0.0085	SAME	0.251654	0.0197706	TRUE	TRUE
EUR	mocoRNFL_q7	chr2:171739103:T:TG	chr2:171739103:T:TG	t	tg	2:171739103	1.05043	0.0492	0.352988	1.908e-08	171558822	172127720	568.898	520	eQTL	chr2_172030703_C_A_b38	a	chr2_172030703_C_A_b38	ENSG00000172878.13	METAP1D		Brain_Cerebellar_Hemisphere	4.02182e-06	8.241e-07	0.352988	0.0734276	-0.0379	0.0077	OPPOSITE	0.333453	0.180398	TRUE	TRUE
EUR	mocoRNFL_q7	chr2:171739103:T:TG	chr2:171739103:T:TG	t	tg	2:171739103	1.05043	0.0492	0.350549	1.908e-08	171558822	172127720	568.898	520	eQTL	chr2_172021092_T_C_b38	t	chr2_172021092_T_C_b38	ENSG00000172878.13	METAP1D		Brain_Cerebellar_Hemisphere	5.50693e-06	5.034e-07	-0.350549	0.0740604	-0.0387	0.0077	SAME	0.588416	0.318332	TRUE	TRUE
EUR	mocoRNFL_q7	chr2:171739103:T:TG	chr2:171739103:T:TG	t	tg	2:171739103	1.05043	0.0492	0.352988	1.908e-08	171558822	172127720	568.898	520	eQTL	chr2_172032858_G_C_b38	c	chr2_172032858_G_C_b38	ENSG00000172878.13	METAP1D		Brain_Cerebellar_Hemisphere	4.02182e-06	1.556e-06	0.352988	0.0734276	-0.037	0.0077	OPPOSITE	0.0764045	0.0413347	TRUE	TRUE
EUR	mocoRNFL_q7	chr2:171739103:T:TG	chr2:171739103:T:TG	t	tg	2:171739103	1.05043	0.0492	0.126418	1.908e-08	171558822	172127720	568.898	520	eQTL	chr2_172030703_C_A_b38	a	chr2_172030703_C_A_b38	ENSG00000172878.13	METAP1D		Nerve_Tibial	2.55375e-06	8.241e-07	0.126418	0.02654	-0.0379	0.0077	OPPOSITE	0.724896	0.293719	TRUE	TRUE
EUR	mocoRNFL_q7	chr2:171739103:T:TG	chr2:171739103:T:TG	t	tg	2:171739103	1.05043	0.0492	0.122052	1.908e-08	171558822	172127720	568.898	520	eQTL	chr2_172021092_T_C_b38	t	chr2_172021092_T_C_b38	ENSG00000172878.13	METAP1D		Nerve_Tibial	4.53217e-06	5.034e-07	-0.122052	0.0263011	-0.0387	0.0077	SAME	0.226938	0.0919523	TRUE	TRUE
EUR	mocoRNFL_q7	chr2:171739103:T:TG	chr2:171739103:T:TG	t	tg	2:171739103	1.05043	0.0492	0.12352	1.908e-08	171558822	172127720	568.898	520	eQTL	chr2_172032858_G_C_b38	c	chr2_172032858_G_C_b38	ENSG00000172878.13	METAP1D		Nerve_Tibial	4.40547e-06	1.556e-06	0.12352	0.0265822	-0.037	0.0077	OPPOSITE	0.0417186	0.0169038	TRUE	TRUE
EUR	mocoRNFL_q7	chr2:171739103:T:TG	chr2:171739103:T:TG	t	tg	2:171739103	1.05043	0.0492	0.186141	1.908e-08	171558822	172127720	568.898	520	eQTL	chr2_172047370_G_A_b38	a	chr2_172047370_G_A_b38	ENSG00000115840.13	SLC25A12		Brain_Anterior_cingulate_cortex_BA24	7.46149e-07	2.346e-06	-0.186141	0.0356617	-0.0365	0.0077	SAME	0.5614	0.0287125	TRUE	TRUE
EUR	mocoRNFL_q7	chr2:171739103:T:TG	chr2:171739103:T:TG	t	tg	2:171739103	1.05043	0.0492	0.186141	1.908e-08	171558822	172127720	568.898	520	eQTL	chr2_172039610_T_G_b38	t	chr2_172039610_T_G_b38	ENSG00000115840.13	SLC25A12		Brain_Anterior_cingulate_cortex_BA24	7.46149e-07	1.31e-06	0.186141	0.0356617	-0.0374	0.0077	OPPOSITE	0.435965	0.0222972	TRUE	TRUE
EUR	mocoRNFL_q7	chr2:171739103:T:TG	chr2:171739103:T:TG	t	tg	2:171739103	1.05043	0.0492	0.150391	1.908e-08	171558822	172127720	568.898	520	eQTL	chr2_172030703_C_A_b38	a	chr2_172030703_C_A_b38	ENSG00000115840.13	SLC25A12		Brain_Hippocampus	1.73613e-06	8.241e-07	-0.150391	0.0299583	-0.0379	0.0077	SAME	0.703255	0.137234	TRUE	TRUE
EUR	mocoRNFL_q7	chr2:171739103:T:TG	chr2:171739103:T:TG	t	tg	2:171739103	1.05043	0.0492	0.141325	1.908e-08	171558822	172127720	568.898	520	eQTL	chr2_172021092_T_C_b38	t	chr2_172021092_T_C_b38	ENSG00000115840.13	SLC25A12		Brain_Hippocampus	3.40942e-06	5.034e-07	0.141325	0.0290632	-0.0387	0.0077	OPPOSITE	0.109328	0.0213344	TRUE	TRUE
EUR	mocoRNFL_q7	chr2:171739103:T:TG	chr2:171739103:T:TG	t	tg	2:171739103	1.05043	0.0492	0.150391	1.908e-08	171558822	172127720	568.898	520	eQTL	chr2_172032858_G_C_b38	c	chr2_172032858_G_C_b38	ENSG00000115840.13	SLC25A12		Brain_Hippocampus	1.73613e-06	1.556e-06	-0.150391	0.0299583	-0.037	0.0077	SAME	0.159886	0.0312003	TRUE	TRUE
EUR	mocoRNFL_q5	chr10:68254881:T:C	chr10:68254881:T:C	t	c	10:68254881	1.05022	0.049	0.507797	9.002e-09	68098183	68868604	770.421	654	eQTL	chr10_68281826_C_T_b38	t	chr10_68281826_C_T_b38	ENSG00000108187.15	PBLD		Brain_Putamen_basal_ganglia	7.36559e-18	1.46e-08	-0.507797	0.0506823	-0.0498	0.0088	SAME	0.253083	0.0116407	TRUE	TRUE
EUR	mocoRNFL_q5	chr10:68254881:T:C	chr10:68254881:T:C	t	c	10:68254881	1.05022	0.049	0.507797	9.002e-09	68098183	68868604	770.421	654	eQTL	chr10_68280354_A_G_b38	a	chr10_68280354_A_G_b38	ENSG00000108187.15	PBLD		Brain_Putamen_basal_ganglia	7.36559e-18	1.614e-08	-0.507797	0.0506823	0.0497	0.0088	OPPOSITE	0.241305	0.011099	TRUE	TRUE
EUR	mocoRNFL_q5	chr10:68254881:T:C	chr10:68254881:T:C	t	c	10:68254881	1.05022	0.049	0.338581	9.002e-09	68098183	68868604	770.421	654	eQTL	chr10_68232096_A_G_b38	a	chr10_68232096_A_G_b38	ENSG00000179774.8	ATOH7		Brain_Cerebellar_Hemisphere	3.99968e-06	3.959e-08	0.338581	0.0704117	0.0479	0.0087	SAME	0.331456	0.0146007	TRUE	TRUE
EUR	mocoRNFL_q5	chr10:68254881:T:C	chr10:68254881:T:C	t	c	10:68254881	1.05022	0.049	0.423767	9.002e-09	68098183	68868604	770.421	654	eQTL	chr10_68281826_C_T_b38	t	chr10_68281826_C_T_b38	ENSG00000179774.8	ATOH7		Artery_Tibial	2.28763e-20	1.46e-08	0.423767	0.0439074	-0.0498	0.0088	OPPOSITE	0.302456	0.0146658	TRUE	TRUE
EUR	mocoRNFL_q5	chr10:68254881:T:C	chr10:68254881:T:C	t	c	10:68254881	1.05022	0.049	0.423767	9.002e-09	68098183	68868604	770.421	654	eQTL	chr10_68280354_A_G_b38	a	chr10_68280354_A_G_b38	ENSG00000179774.8	ATOH7		Artery_Tibial	2.28763e-20	1.614e-08	0.423767	0.0439074	0.0497	0.0088	SAME	0.288381	0.0139833	TRUE	TRUE
EUR	mocoGCC_q3	chr10:68249632:C:T	chr10:68249632:C:T	t	c	10:68249632	0.9412	-0.0606	0.305169	4.046e-12	68098183	68694402	596.219	1003	eQTL	chr10_68242636_A_T_b38	a	chr10_68242636_A_T_b38	ENSG00000179774.8	ATOH7		Brain_Cerebellar_Hemisphere	3.26365e-05	2.235e-11	-0.305169	0.0709861	0.0583	0.0087	OPPOSITE	0.17374	0.0161606	TRUE	TRUE
EUR	mocoGCC_q3	chr10:68249632:C:T	chr10:68249632:C:T	t	c	10:68249632	0.9412	-0.0606	0.305169	4.046e-12	68098183	68694402	596.219	1003	eQTL	chr10_68240536_A_G_b38	a	chr10_68240536_A_G_b38	ENSG00000179774.8	ATOH7		Brain_Cerebellar_Hemisphere	3.26365e-05	2.612e-11	-0.305169	0.0709861	0.0582	0.0087	OPPOSITE	0.163733	0.0152297	TRUE	TRUE
EUR	mocoGCC_q3	chr10:68249632:C:T	chr10:68249632:C:T	t	c	10:68249632	0.9412	-0.0606	0.305169	4.046e-12	68098183	68694402	596.219	1003	eQTL	chr10_68241124_C_T_b38	t	chr10_68241124_C_T_b38	ENSG00000179774.8	ATOH7		Brain_Cerebellar_Hemisphere	3.26365e-05	2.788e-11	-0.305169	0.0709861	-0.0581	0.0087	SAME	0.154319	0.0143541	TRUE	TRUE
EUR	mocoGCC_q3	chr10:68249632:C:T	chr10:68249632:C:T	t	c	10:68249632	0.9412	-0.0606	0.338581	4.046e-12	68098183	68694402	596.219	1003	eQTL	chr10_68232096_A_G_b38	a	chr10_68232096_A_G_b38	ENSG00000179774.8	ATOH7		Brain_Cerebellar_Hemisphere	3.99968e-06	7.112e-11	0.338581	0.0704117	0.0564	0.0087	SAME	0.113597	0.0105663	TRUE	TRUE
EUR	mocoGCC_q3	chr10:68249632:C:T	chr10:68249632:C:T	t	c	10:68249632	0.9412	-0.0606	0.344722	4.046e-12	68098183	68694402	596.219	1003	eQTL	chr10_68249632_C_T_b38	t	chr10_68249632_C_T_b38	ENSG00000179774.8	ATOH7		Artery_Coronary	1.80625e-05	4.046e-12	0.344722	0.0781558	-0.0606	0.0087	OPPOSITE	0.34604	0.0159495	TRUE	TRUE
EUR	mocoGCC_q3	chr10:68249632:C:T	chr10:68249632:C:T	t	c	10:68249632	0.9412	-0.0606	0.344722	4.046e-12	68098183	68694402	596.219	1003	eQTL	chr10_68249631_G_A_b38	a	chr10_68249631_G_A_b38	ENSG00000179774.8	ATOH7		Artery_Coronary	1.80625e-05	4.073e-12	0.344722	0.0781558	-0.0606	0.0087	OPPOSITE	0.34604	0.0159495	TRUE	TRUE
EUR	mocoGCC_q3	chr17:81611261:G:A	chr17:81611261:G:A	a	g	17:81611261	0.956093	-0.0449	0.899896	7.202e-09	81418853	81779444	360.591	478	eQTL	chr17_81647906_T_TTAAC_b38	t	chr17_81647906_T_TTAAC_b38	ENSG00000182612.10	TSPAN10		Brain_Cerebellum	1.07739e-26	8.826e-09	-0.899896	0.070239	-0.0447	0.0078	SAME	0.923421	1	TRUE	TRUE
EUR	mocoGCC_q3	chr17:81611261:G:A	chr17:81611261:G:A	a	g	17:81611261	0.956093	-0.0449	0.907844	7.202e-09	81418853	81779444	360.591	478	eQTL	chr17_81648542_A_G_b38	a	chr17_81648542_A_G_b38	ENSG00000182612.10	TSPAN10		Brain_Cerebellum	5.94634e-27	3.64e-08	0.907844	0.0703601	0.0427	0.0078	SAME	0.0765788	0.0829294	TRUE	TRUE
EUR	mocoGCC_q3	chr17:81611261:G:A	chr17:81611261:G:A	a	g	17:81611261	0.956093	-0.0449	0.352481	7.202e-09	81418853	81779444	360.591	478	eQTL	chr17_81647906_T_TTAAC_b38	t	chr17_81647906_T_TTAAC_b38	ENSG00000182612.10	TSPAN10		Brain_Nucleus_accumbens_basal_ganglia	5.67818e-06	8.826e-09	-0.352481	0.0750955	-0.0447	0.0078	SAME	0.914196	0.906221	TRUE	TRUE
EUR	mocoGCC_q3	chr17:81611261:G:A	chr17:81611261:G:A	a	g	17:81611261	0.956093	-0.0449	0.345183	7.202e-09	81418853	81779444	360.591	478	eQTL	chr17_81648542_A_G_b38	a	chr17_81648542_A_G_b38	ENSG00000182612.10	TSPAN10		Brain_Nucleus_accumbens_basal_ganglia	1.03007e-05	3.64e-08	0.345183	0.0757988	0.0427	0.0078	SAME	0.0702469	0.0696342	TRUE	TRUE
EUR	mocoGCC_q3	chr17:81611261:G:A	chr17:81611261:G:A	a	g	17:81611261	0.956093	-0.0449	0.897679	7.202e-09	81418853	81779444	360.591	478	eQTL	chr17_81597516_G_A_b38	a	chr17_81597516_G_A_b38	ENSG00000182612.10	TSPAN10		Brain_Cerebellar_Hemisphere	1.04962e-25	9.636e-09	-0.897679	0.0687512	-0.0445	0.0078	SAME	0.35185	0.0662125	TRUE	TRUE
EUR	mocoGCC_q3	chr17:81611261:G:A	chr17:81611261:G:A	a	g	17:81611261	0.956093	-0.0449	0.897679	7.202e-09	81418853	81779444	360.591	478	eQTL	chr17_81597904_C_G_b38	c	chr17_81597904_C_G_b38	ENSG00000182612.10	TSPAN10		Brain_Cerebellar_Hemisphere	1.04962e-25	1.009e-08	-0.897679	0.0687512	0.0445	0.0078	OPPOSITE	0.35185	0.0662125	TRUE	TRUE
EUR	mocoGCC_q3	chr17:81611261:G:A	chr17:81611261:G:A	a	g	17:81611261	0.956093	-0.0449	0.897679	7.202e-09	81418853	81779444	360.591	478	eQTL	chr17_81616447_T_C_b38	t	chr17_81616447_T_C_b38	ENSG00000182612.10	TSPAN10		Brain_Cerebellar_Hemisphere	1.04962e-25	1.177e-08	0.897679	0.0687512	0.0443	0.0078	SAME	0.0757486	0.0142546	TRUE	TRUE
EUR	mocoGCC_q3	chr17:81611261:G:A	chr17:81611261:G:A	a	g	17:81611261	0.956093	-0.0449	0.897679	7.202e-09	81418853	81779444	360.591	478	eQTL	chr17_81632415_T_C_b38	t	chr17_81632415_T_C_b38	ENSG00000182612.10	TSPAN10		Brain_Cerebellar_Hemisphere	1.04962e-25	1.121e-08	0.897679	0.0687512	0.0443	0.0078	SAME	0.0757486	0.0142546	TRUE	TRUE
EUR	mocoGCC_q3	chr17:81611261:G:A	chr17:81611261:G:A	a	g	17:81611261	0.956093	-0.0449	0.897679	7.202e-09	81418853	81779444	360.591	478	eQTL	chr17_81635037_G_T_b38	t	chr17_81635037_G_T_b38	ENSG00000182612.10	TSPAN10		Brain_Cerebellar_Hemisphere	1.04962e-25	1.255e-08	0.897679	0.0687512	-0.0442	0.0078	OPPOSITE	0.0615957	0.0115913	TRUE	TRUE
EUR	mocoGCC_q3	chr17:81611261:G:A	chr17:81611261:G:A	a	g	17:81611261	0.956093	-0.0449	0.498176	7.202e-09	81418853	81779444	360.591	478	eQTL	chr17_81611261_G_A_b38	a	chr17_81611261_G_A_b38	ENSG00000182612.10	TSPAN10		Brain_Cortex	9.66365e-10	7.202e-09	-0.498176	0.0767724	-0.0449	0.0078	SAME	0.531858	0.0781844	TRUE	TRUE
EUR	mocoGCC_q3	chr17:81611261:G:A	chr17:81611261:G:A	a	g	17:81611261	0.956093	-0.0449	0.486338	7.202e-09	81418853	81779444	360.591	478	eQTL	chr17_81597516_G_A_b38	a	chr17_81597516_G_A_b38	ENSG00000182612.10	TSPAN10		Brain_Cortex	2.54469e-09	9.636e-09	-0.486338	0.077143	-0.0445	0.0078	SAME	0.0950343	0.0139703	TRUE	TRUE
EUR	mocoGCC_q3	chr17:81611261:G:A	chr17:81611261:G:A	a	g	17:81611261	0.956093	-0.0449	0.486338	7.202e-09	81418853	81779444	360.591	478	eQTL	chr17_81597904_C_G_b38	c	chr17_81597904_C_G_b38	ENSG00000182612.10	TSPAN10		Brain_Cortex	2.54469e-09	1.009e-08	-0.486338	0.077143	0.0445	0.0078	OPPOSITE	0.0950343	0.0139703	TRUE	TRUE
EUR	autoRNFL_q3	chr10:68253493:C:T	chr10:68253493:C:T	t	c	10:68253493	0.929043	-0.0736	0.507797	1.857e-18	68098183	68868604	770.421	1158	eQTL	chr10_68280354_A_G_b38	a	chr10_68280354_A_G_b38	ENSG00000108187.15	PBLD		Brain_Putamen_basal_ganglia	7.36559e-18	3.593e-18	-0.507797	0.0506823	0.0753	0.0087	OPPOSITE	0.259252	0.0138228	TRUE	TRUE
EUR	autoRNFL_q3	chr10:68253493:C:T	chr10:68253493:C:T	t	c	10:68253493	0.929043	-0.0736	0.507797	1.857e-18	68098183	68868604	770.421	1158	eQTL	chr10_68281826_C_T_b38	t	chr10_68281826_C_T_b38	ENSG00000108187.15	PBLD		Brain_Putamen_basal_ganglia	7.36559e-18	3.928e-18	-0.507797	0.0506823	-0.0752	0.0087	SAME	0.240168	0.0128053	TRUE	TRUE
EUR	autoRNFL_q3	chr10:68253493:C:T	chr10:68253493:C:T	t	c	10:68253493	0.929043	-0.0736	0.338581	1.857e-18	68098183	68868604	770.421	1158	eQTL	chr10_68232096_A_G_b38	a	chr10_68232096_A_G_b38	ENSG00000179774.8	ATOH7		Brain_Cerebellar_Hemisphere	3.99968e-06	3.337e-18	0.338581	0.0704117	0.0747	0.0086	SAME	0.54697	0.088179	TRUE	TRUE
EUR	autoRNFL_q3	chr10:68253493:C:T	chr10:68253493:C:T	t	c	10:68253493	0.929043	-0.0736	0.305169	1.857e-18	68098183	68868604	770.421	1158	eQTL	chr10_68240536_A_G_b38	a	chr10_68240536_A_G_b38	ENSG00000179774.8	ATOH7		Brain_Cerebellar_Hemisphere	3.26365e-05	7.86e-18	-0.305169	0.0709861	0.0744	0.0087	OPPOSITE	0.100794	0.0162494	TRUE	TRUE
EUR	autoRNFL_q3	chr10:68253493:C:T	chr10:68253493:C:T	t	c	10:68253493	0.929043	-0.0736	0.305169	1.857e-18	68098183	68868604	770.421	1158	eQTL	chr10_68241124_C_T_b38	t	chr10_68241124_C_T_b38	ENSG00000179774.8	ATOH7		Brain_Cerebellar_Hemisphere	3.26365e-05	8.662e-18	-0.305169	0.0709861	-0.0743	0.0087	SAME	0.0934228	0.015061	TRUE	TRUE
EUR	autoRNFL_q3	chr10:68253493:C:T	chr10:68253493:C:T	t	c	10:68253493	0.929043	-0.0736	0.305169	1.857e-18	68098183	68868604	770.421	1158	eQTL	chr10_68242636_A_T_b38	a	chr10_68242636_A_T_b38	ENSG00000179774.8	ATOH7		Brain_Cerebellar_Hemisphere	3.26365e-05	9.761e-18	-0.305169	0.0709861	0.0742	0.0087	OPPOSITE	0.0865982	0.0139608	TRUE	TRUE
EUR	autoRNFL_q3	chr14:60606157:T:C	chr14:60606157:T:C	t	c	14:60606157	1.05327	0.0519	0.145487	7.446e-12	60270263	61166622	896.359	794	eQTL	chr14_60509819_C_A_b38	a	chr14_60509819_C_A_b38	ENSG00000126773.12	PCNX4		Artery_Tibial	7.39096e-07	3.286e-11	-0.145487	0.0290225	-0.0503	0.0076	SAME	0.35728	0.0268704	TRUE	TRUE
EUR	autoRNFL_q3	chr14:60606157:T:C	chr14:60606157:T:C	t	c	14:60606157	1.05327	0.0519	0.143707	7.446e-12	60270263	61166622	896.359	794	eQTL	chr14_60419432_T_C_b38	t	chr14_60419432_T_C_b38	ENSG00000126773.12	PCNX4		Artery_Tibial	1.0488e-06	5.165e-10	0.143707	0.0290795	0.0479	0.0077	SAME	0.148845	0.0111943	TRUE	TRUE
EUR	autoRNFL_q3	chr8:108279863:C:T	chr8:108279863:C:T	t	c	8:108279863	0.952086	-0.0491	0.196001	1.231e-08	107951768	108622515	670.747	916	eQTL	chr8_108257052_C_T_b38	t	chr8_108257052_C_T_b38	ENSG00000104412.7	EMC2		Brain_Cerebellum	4.37499e-05	0.009661	0.196001	0.0467084	0.0191	0.0074	SAME	0.177882	0.0131852	TRUE	TRUE
EUR	autoRNFL_q3	chr8:108279863:C:T	chr8:108279863:C:T	t	c	8:108279863	0.952086	-0.0491	0.196001	1.231e-08	107951768	108622515	670.747	916	eQTL	chr8_108259777_T_C_b38	t	chr8_108259777_T_C_b38	ENSG00000104412.7	EMC2		Brain_Cerebellum	4.37499e-05	0.009628	0.196001	0.0467084	-0.0191	0.0074	OPPOSITE	0.177882	0.0131852	TRUE	TRUE
EUR	autoRNFL_q3	chr8:108279863:C:T	chr8:108279863:C:T	t	c	8:108279863	0.952086	-0.0491	0.196001	1.231e-08	107951768	108622515	670.747	916	eQTL	chr8_108260956_G_A_b38	a	chr8_108260956_G_A_b38	ENSG00000104412.7	EMC2		Brain_Cerebellum	4.37499e-05	0.009832	0.196001	0.0467084	0.019	0.0074	SAME	0.169232	0.012544	TRUE	TRUE
EUR	autoRNFL_q3	chr8:108279863:C:T	chr8:108279863:C:T	t	c	8:108279863	0.952086	-0.0491	0.233057	1.231e-08	107951768	108622515	670.747	916	eQTL	chr8_108249551_G_T_b38	t	chr8_108249551_G_T_b38	ENSG00000104408.9	EIF3E		Brain_Putamen_basal_ganglia	1.28681e-07	0.008662	-0.233057	0.0417015	0.0194	0.0074	OPPOSITE	0.159878	0.010259	TRUE	TRUE
EUR	autoRNFL_q3	chr8:108279863:C:T	chr8:108279863:C:T	t	c	8:108279863	0.952086	-0.0491	0.233057	1.231e-08	107951768	108622515	670.747	916	eQTL	chr8_108239461_C_G_b38	c	chr8_108239461_C_G_b38	ENSG00000104408.9	EIF3E		Brain_Putamen_basal_ganglia	1.28681e-07	0.008859	-0.233057	0.0417015	-0.0193	0.0074	SAME	0.159225	0.0102171	TRUE	TRUE
EUR	autoRNFL_q3	chr8:108279863:C:T	chr8:108279863:C:T	t	c	8:108279863	0.952086	-0.0491	0.220814	1.231e-08	107951768	108622515	670.747	916	eQTL	chr8_108257052_C_T_b38	t	chr8_108257052_C_T_b38	ENSG00000104412.7	EMC2		Brain_Cerebellar_Hemisphere	7.70785e-05	0.009661	0.220814	0.0541416	0.0191	0.0074	SAME	0.215661	0.0149254	TRUE	TRUE
EUR	autoRNFL_q3	chr8:108279863:C:T	chr8:108279863:C:T	t	c	8:108279863	0.952086	-0.0491	0.220814	1.231e-08	107951768	108622515	670.747	916	eQTL	chr8_108259777_T_C_b38	t	chr8_108259777_T_C_b38	ENSG00000104412.7	EMC2		Brain_Cerebellar_Hemisphere	7.70785e-05	0.009628	0.220814	0.0541416	-0.0191	0.0074	OPPOSITE	0.215661	0.0149254	TRUE	TRUE
EUR	autoRNFL_q3	chr8:108279863:C:T	chr8:108279863:C:T	t	c	8:108279863	0.952086	-0.0491	0.220814	1.231e-08	107951768	108622515	670.747	916	eQTL	chr8_108260956_G_A_b38	a	chr8_108260956_G_A_b38	ENSG00000104412.7	EMC2		Brain_Cerebellar_Hemisphere	7.70785e-05	0.009832	0.220814	0.0541416	0.019	0.0074	SAME	0.205174	0.0141996	TRUE	TRUE
EUR	autoRNFL_q3	chr8:108279863:C:T	chr8:108279863:C:T	t	c	8:108279863	0.952086	-0.0491	0.621252	1.231e-08	107951768	108622515	670.747	916	sQTL	chr8_108257052_C_T_b38	t	chr8_108257052_C_T_b38	ENSG00000104408.9	EIF3E	chr8:108233672:108234998:clu_41561:ENSG00000104408.9	Brain_Spinal_cord_cervical_c-1	1.1883e-08	0.009661	0.621252	0.100042	0.0191	0.0074	SAME	0.216456	0.0145925	FALSE	TRUE
EUR	autoRNFL_q3	chr8:108279863:C:T	chr8:108279863:C:T	t	c	8:108279863	0.952086	-0.0491	0.621252	1.231e-08	107951768	108622515	670.747	916	sQTL	chr8_108259777_T_C_b38	t	chr8_108259777_T_C_b38	ENSG00000104408.9	EIF3E	chr8:108233672:108234998:clu_41561:ENSG00000104408.9	Brain_Spinal_cord_cervical_c-1	1.1883e-08	0.009628	0.621252	0.100042	-0.0191	0.0074	OPPOSITE	0.216456	0.0145925	FALSE	TRUE
EUR	autoRNFL_q3	chr8:108279863:C:T	chr8:108279863:C:T	t	c	8:108279863	0.952086	-0.0491	0.621252	1.231e-08	107951768	108622515	670.747	916	sQTL	chr8_108260956_G_A_b38	a	chr8_108260956_G_A_b38	ENSG00000104408.9	EIF3E	chr8:108233672:108234998:clu_41561:ENSG00000104408.9	Brain_Spinal_cord_cervical_c-1	1.1883e-08	0.009832	0.621252	0.100042	0.019	0.0074	SAME	0.20593	0.0138829	FALSE	TRUE
EUR	autoRNFL_q3	chr8:108279863:C:T	chr8:108279863:C:T	t	c	8:108279863	0.952086	-0.0491	0.554784	1.231e-08	107951768	108622515	670.747	916	sQTL	chr8_108249551_G_T_b38	t	chr8_108249551_G_T_b38	ENSG00000104408.9	EIF3E	chr8:108229195:108234998:clu_47884:ENSG00000104408.9	Brain_Caudate_basal_ganglia	4.2652e-08	0.008662	-0.554784	0.0966311	0.0194	0.0074	OPPOSITE	0.197223	0.0191616	FALSE	TRUE
EUR	autoRNFL_q3	chr8:108279863:C:T	chr8:108279863:C:T	t	c	8:108279863	0.952086	-0.0491	0.554784	1.231e-08	107951768	108622515	670.747	916	sQTL	chr8_108239461_C_G_b38	c	chr8_108239461_C_G_b38	ENSG00000104408.9	EIF3E	chr8:108229195:108234998:clu_47884:ENSG00000104408.9	Brain_Caudate_basal_ganglia	4.2652e-08	0.008859	-0.554784	0.0966311	-0.0193	0.0074	SAME	0.206569	0.0200696	FALSE	TRUE
EUR	autoRNFL_q3	chr8:108279863:C:T	chr8:108279863:C:T	t	c	8:108279863	0.952086	-0.0491	0.554784	1.231e-08	107951768	108622515	670.747	916	sQTL	chr8_108243503_C_T_b38	t	chr8_108243503_C_T_b38	ENSG00000104408.9	EIF3E	chr8:108229195:108234998:clu_47884:ENSG00000104408.9	Brain_Caudate_basal_ganglia	4.2652e-08	0.009085	-0.554784	0.0966311	0.0192	0.0074	OPPOSITE	0.195932	0.0190362	FALSE	TRUE
EUR	autoRNFL_q3	chr8:108279863:C:T	chr8:108279863:C:T	t	c	8:108279863	0.952086	-0.0491	0.554784	1.231e-08	107951768	108622515	670.747	916	sQTL	chr8_108242977_C_T_b38	t	chr8_108242977_C_T_b38	ENSG00000104408.9	EIF3E	chr8:108229195:108234998:clu_47884:ENSG00000104408.9	Brain_Caudate_basal_ganglia	4.2652e-08	0.009086	-0.554784	0.0966311	0.0192	0.0074	OPPOSITE	0.195932	0.0190362	FALSE	TRUE
EUR	autoRNFL_q3	chr8:108279863:C:T	chr8:108279863:C:T	t	c	8:108279863	0.952086	-0.0491	0.554784	1.231e-08	107951768	108622515	670.747	916	sQTL	chr8_108250067_T_C_b38	t	chr8_108250067_T_C_b38	ENSG00000104408.9	EIF3E	chr8:108229195:108234998:clu_47884:ENSG00000104408.9	Brain_Caudate_basal_ganglia	4.2652e-08	0.008656	-0.554784	0.0966311	-0.0194	0.0074	SAME	0.172745	0.0167834	FALSE	TRUE
EUR	autoRNFL_q3	chr8:108279863:C:T	chr8:108279863:C:T	t	c	8:108279863	0.952086	-0.0491	0.706221	1.231e-08	107951768	108622515	670.747	916	sQTL	chr8_108249551_G_T_b38	t	chr8_108249551_G_T_b38	ENSG00000104408.9	EIF3E	chr8:108233672:108234998:clu_55068:ENSG00000104408.9	Artery_Aorta	1.76216e-35	0.008662	0.706221	0.0508232	0.0194	0.0074	SAME	0.165641	0.0166998	FALSE	TRUE
EUR	autoRNFL_q3	chr8:108279863:C:T	chr8:108279863:C:T	t	c	8:108279863	0.952086	-0.0491	0.706221	1.231e-08	107951768	108622515	670.747	916	sQTL	chr8_108239461_C_G_b38	c	chr8_108239461_C_G_b38	ENSG00000104408.9	EIF3E	chr8:108233672:108234998:clu_55068:ENSG00000104408.9	Artery_Aorta	1.76216e-35	0.008859	0.706221	0.0508232	-0.0193	0.0074	OPPOSITE	0.256753	0.0258857	FALSE	TRUE
EUR	autoRNFL_q3	chr8:108279863:C:T	chr8:108279863:C:T	t	c	8:108279863	0.952086	-0.0491	0.706221	1.231e-08	107951768	108622515	670.747	916	sQTL	chr8_108243503_C_T_b38	t	chr8_108243503_C_T_b38	ENSG00000104408.9	EIF3E	chr8:108233672:108234998:clu_55068:ENSG00000104408.9	Artery_Aorta	1.76216e-35	0.009085	0.706221	0.0508232	0.0192	0.0074	SAME	0.243532	0.0245529	FALSE	TRUE
EUR	autoRNFL_q3	chr8:108279863:C:T	chr8:108279863:C:T	t	c	8:108279863	0.952086	-0.0491	0.706221	1.231e-08	107951768	108622515	670.747	916	sQTL	chr8_108242977_C_T_b38	t	chr8_108242977_C_T_b38	ENSG00000104408.9	EIF3E	chr8:108233672:108234998:clu_55068:ENSG00000104408.9	Artery_Aorta	1.76216e-35	0.009086	0.706221	0.0508232	0.0192	0.0074	SAME	0.243532	0.0245529	FALSE	TRUE
EUR	autoRNFL_q3	chr8:108279863:C:T	chr8:108279863:C:T	t	c	8:108279863	0.952086	-0.0491	0.724113	1.231e-08	107951768	108622515	670.747	916	sQTL	chr8_108257052_C_T_b38	t	chr8_108257052_C_T_b38	ENSG00000104408.9	EIF3E	chr8:108229195:108234998:clu_37439:ENSG00000104408.9	Brain_Substantia_nigra	5.92456e-07	0.009661	-0.724113	0.134552	0.0191	0.0074	OPPOSITE	0.337119	0.0201233	FALSE	TRUE
EUR	autoRNFL_q3	chr8:108279863:C:T	chr8:108279863:C:T	t	c	8:108279863	0.952086	-0.0491	0.724113	1.231e-08	107951768	108622515	670.747	916	sQTL	chr8_108259777_T_C_b38	t	chr8_108259777_T_C_b38	ENSG00000104408.9	EIF3E	chr8:108229195:108234998:clu_37439:ENSG00000104408.9	Brain_Substantia_nigra	5.92456e-07	0.009628	-0.724113	0.134552	-0.0191	0.0074	SAME	0.337119	0.0201233	FALSE	TRUE
EUR	autoRNFL_q3	chr8:108279863:C:T	chr8:108279863:C:T	t	c	8:108279863	0.952086	-0.0491	0.724113	1.231e-08	107951768	108622515	670.747	916	sQTL	chr8_108260956_G_A_b38	a	chr8_108260956_G_A_b38	ENSG00000104408.9	EIF3E	chr8:108229195:108234998:clu_37439:ENSG00000104408.9	Brain_Substantia_nigra	5.92456e-07	0.009832	-0.724113	0.134552	0.019	0.0074	OPPOSITE	0.320726	0.0191448	FALSE	TRUE
EUR	autoRNFL_q3	chr8:108279863:C:T	chr8:108279863:C:T	t	c	8:108279863	0.952086	-0.0491	0.495942	1.231e-08	107951768	108622515	670.747	916	sQTL	chr8_108257052_C_T_b38	t	chr8_108257052_C_T_b38	ENSG00000104408.9	EIF3E	chr8:108229195:108234998:clu_45838:ENSG00000104408.9	Brain_Frontal_Cortex_BA9	3.85563e-07	0.009661	-0.495942	0.0933728	0.0191	0.0074	OPPOSITE	0.231503	0.0159403	FALSE	TRUE
EUR	autoRNFL_q3	chr8:108279863:C:T	chr8:108279863:C:T	t	c	8:108279863	0.952086	-0.0491	0.495942	1.231e-08	107951768	108622515	670.747	916	sQTL	chr8_108259777_T_C_b38	t	chr8_108259777_T_C_b38	ENSG00000104408.9	EIF3E	chr8:108229195:108234998:clu_45838:ENSG00000104408.9	Brain_Frontal_Cortex_BA9	3.85563e-07	0.009628	-0.495942	0.0933728	-0.0191	0.0074	SAME	0.231503	0.0159403	FALSE	TRUE
EUR	autoRNFL_q3	chr8:108279863:C:T	chr8:108279863:C:T	t	c	8:108279863	0.952086	-0.0491	0.495942	1.231e-08	107951768	108622515	670.747	916	sQTL	chr8_108260956_G_A_b38	a	chr8_108260956_G_A_b38	ENSG00000104408.9	EIF3E	chr8:108229195:108234998:clu_45838:ENSG00000104408.9	Brain_Frontal_Cortex_BA9	3.85563e-07	0.009832	-0.495942	0.0933728	0.019	0.0074	OPPOSITE	0.220246	0.0151652	FALSE	TRUE
EUR	autoRNFL_q8	chr10:68281826:C:T	chr10:68281826:C:T	t	c	10:68281826	0.94857	-0.0528	0.507797	1.566e-09	68098183	68880887	782.704	895	eQTL	chr10_68281826_C_T_b38	t	chr10_68281826_C_T_b38	ENSG00000108187.15	PBLD		Brain_Putamen_basal_ganglia	7.36559e-18	1.566e-09	-0.507797	0.0506823	-0.0528	0.0087	SAME	0.218875	0.0229657	TRUE	TRUE
EUR	autoRNFL_q8	chr10:68281826:C:T	chr10:68281826:C:T	t	c	10:68281826	0.94857	-0.0528	0.507797	1.566e-09	68098183	68880887	782.704	895	eQTL	chr10_68280354_A_G_b38	a	chr10_68280354_A_G_b38	ENSG00000108187.15	PBLD		Brain_Putamen_basal_ganglia	7.36559e-18	1.583e-09	-0.507797	0.0506823	0.0527	0.0087	OPPOSITE	0.207236	0.0217444	TRUE	TRUE
EUR	autoRNFL_q8	chr10:68281826:C:T	chr10:68281826:C:T	t	c	10:68281826	0.94857	-0.0528	0.502989	1.566e-09	68098183	68880887	782.704	895	eQTL	chr10_68276805_C_T_b38	t	chr10_68276805_C_T_b38	ENSG00000108187.15	PBLD		Brain_Putamen_basal_ganglia	1.27108e-17	1.847e-09	0.502989	0.0506863	-0.0525	0.0087	OPPOSITE	0.179626	0.0188474	TRUE	TRUE
EUR	autoRNFL_q8	chr10:68281826:C:T	chr10:68281826:C:T	t	c	10:68281826	0.94857	-0.0528	0.502989	1.566e-09	68098183	68880887	782.704	895	eQTL	chr10_68278641_A_G_b38	a	chr10_68278641_A_G_b38	ENSG00000108187.15	PBLD		Brain_Putamen_basal_ganglia	1.27108e-17	1.974e-09	0.502989	0.0506863	0.0524	0.0087	SAME	0.170113	0.0178493	TRUE	TRUE
EUR	autoRNFL_q8	chr10:68281826:C:T	chr10:68281826:C:T	t	c	10:68281826	0.94857	-0.0528	0.502989	1.566e-09	68098183	68880887	782.704	895	eQTL	chr10_68279137_A_G_b38	a	chr10_68279137_A_G_b38	ENSG00000108187.15	PBLD		Brain_Putamen_basal_ganglia	1.27108e-17	2.286e-09	0.502989	0.0506863	0.0523	0.0088	SAME	0.117078	0.0122845	TRUE	TRUE
EUR	autoRNFL_q8	chr10:68281826:C:T	chr10:68281826:C:T	t	c	10:68281826	0.94857	-0.0528	0.509245	1.566e-09	68098183	68880887	782.704	895	eQTL	chr10_68284945_A_G_b38	a	chr10_68284945_A_G_b38	ENSG00000108187.15	PBLD		Brain_Putamen_basal_ganglia	4.26406e-18	3.968e-09	-0.509245	0.0503459	0.0514	0.0087	OPPOSITE	0.107072	0.0112346	TRUE	TRUE
EUR	autoRNFL_q8	chr10:68281826:C:T	chr10:68281826:C:T	t	c	10:68281826	0.94857	-0.0528	0.380852	1.566e-09	68098183	68880887	782.704	895	eQTL	chr10_68281826_C_T_b38	t	chr10_68281826_C_T_b38	ENSG00000108187.15	PBLD		Brain_Cerebellar_Hemisphere	4.50896e-07	1.566e-09	-0.380852	0.0718009	-0.0528	0.0087	SAME	0.32497	0.0142848	TRUE	TRUE
EUR	autoRNFL_q8	chr10:68281826:C:T	chr10:68281826:C:T	t	c	10:68281826	0.94857	-0.0528	0.380852	1.566e-09	68098183	68880887	782.704	895	eQTL	chr10_68280354_A_G_b38	a	chr10_68280354_A_G_b38	ENSG00000108187.15	PBLD		Brain_Cerebellar_Hemisphere	4.50896e-07	1.583e-09	-0.380852	0.0718009	0.0527	0.0087	OPPOSITE	0.30769	0.0135252	TRUE	TRUE
EUR	autoRNFL_q8	chr10:68281826:C:T	chr10:68281826:C:T	t	c	10:68281826	0.94857	-0.0528	0.423767	1.566e-09	68098183	68880887	782.704	895	eQTL	chr10_68281826_C_T_b38	t	chr10_68281826_C_T_b38	ENSG00000179774.8	ATOH7		Artery_Tibial	2.28763e-20	1.566e-09	0.423767	0.0439074	-0.0528	0.0087	OPPOSITE	0.281723	0.0230752	TRUE	TRUE
EUR	autoRNFL_q8	chr10:68281826:C:T	chr10:68281826:C:T	t	c	10:68281826	0.94857	-0.0528	0.334823	1.566e-09	68098183	68880887	782.704	895	eQTL	chr10_68281826_C_T_b38	t	chr10_68281826_C_T_b38	ENSG00000233590.1	RP11-153K11.3		Artery_Tibial	6.05149e-12	1.566e-09	0.334823	0.0475374	-0.0528	0.0087	OPPOSITE	0.184385	0.0100556	TRUE	TRUE
EUR	autoRNFL_q8	chr10:68281826:C:T	chr10:68281826:C:T	t	c	10:68281826	0.94857	-0.0528	0.423767	1.566e-09	68098183	68880887	782.704	895	eQTL	chr10_68280354_A_G_b38	a	chr10_68280354_A_G_b38	ENSG00000179774.8	ATOH7		Artery_Tibial	2.28763e-20	1.583e-09	0.423767	0.0439074	0.0527	0.0087	SAME	0.266742	0.0218482	TRUE	TRUE
EUR	autoRNFL_q8	chr10:68281826:C:T	chr10:68281826:C:T	t	c	10:68281826	0.94857	-0.0528	0.4424	1.566e-09	68098183	68880887	782.704	895	eQTL	chr10_68276805_C_T_b38	t	chr10_68276805_C_T_b38	ENSG00000179774.8	ATOH7		Artery_Tibial	1.06297e-21	1.847e-09	-0.4424	0.0441584	-0.0525	0.0087	SAME	0.163638	0.0134032	TRUE	TRUE
EUR	autoRNFL_q8	chr10:68281826:C:T	chr10:68281826:C:T	t	c	10:68281826	0.94857	-0.0528	0.4424	1.566e-09	68098183	68880887	782.704	895	eQTL	chr10_68278641_A_G_b38	a	chr10_68278641_A_G_b38	ENSG00000179774.8	ATOH7		Artery_Tibial	1.06297e-21	1.974e-09	-0.4424	0.0441584	0.0524	0.0087	OPPOSITE	0.154972	0.0126934	TRUE	TRUE
EUR	autoRNFL_q8	chr14:60642107:C:A	chr14:60642107:C:A	a	c	14:60642107	0.959349	-0.0415	0.11257	4.697e-08	60270263	61166622	896.359	819	eQTL	chr14_60762073_A_G_b38	a	chr14_60762073_A_G_b38	ENSG00000139974.15	SLC38A6		Artery_Tibial	0.000180613	6.167e-07	-0.11257	0.0298417	0.0375	0.0075	OPPOSITE	0.857553	0.0275433	TRUE	TRUE
EUR	autoRNFL_q8	chr14:60642107:C:A	chr14:60642107:C:A	a	c	14:60642107	0.959349	-0.0415	0.144975	4.697e-08	60270263	61166622	896.359	819	eQTL	chr14_60762073_A_G_b38	a	chr14_60762073_A_G_b38	ENSG00000100625.8	SIX4		Artery_Tibial	4.34566e-06	6.167e-07	-0.144975	0.0312177	0.0375	0.0075	OPPOSITE	0.969517	0.0575392	TRUE	TRUE
EUR	autoRNFL_q8	chr14:60642107:C:A	chr14:60642107:C:A	a	c	14:60642107	0.959349	-0.0415	0.145487	4.697e-08	60270263	61166622	896.359	810	eQTL	chr14_60509819_C_A_b38	a	chr14_60509819_C_A_b38	ENSG00000126773.12	PCNX4		Artery_Tibial	7.39096e-07	7.161e-08	-0.145487	0.0290225	-0.0412	0.0076	SAME	0.331962	0.0204743	TRUE	TRUE
EUR	autoRNFL_q8	chr14:60642107:C:A	chr14:60642107:C:A	a	c	14:60642107	0.959349	-0.0415	0.143707	4.697e-08	60270263	61166622	896.359	810	eQTL	chr14_60419432_T_C_b38	t	chr14_60419432_T_C_b38	ENSG00000126773.12	PCNX4		Artery_Tibial	1.0488e-06	1.713e-07	0.143707	0.0290795	0.0406	0.0078	SAME	0.28968	0.0178665	TRUE	TRUE
EUR	mocoRNFL_q1	chr10:68263296:A:G	chr10:68263296:A:G	a	g	10:68263296	0.934167	-0.0681	0.381502	9.644e-16	68098183	68868604	770.421	1140	eQTL	chr10_68261045_G_A_b38	a	chr10_68261045_G_A_b38	ENSG00000179774.8	ATOH7		Artery_Aorta	2.91814e-08	1.999e-15	0.381502	0.0670683	0.0674	0.0085	SAME	0.378864	0.0181474	TRUE	TRUE
EUR	mocoRNFL_q1	chr10:68263296:A:G	chr10:68263296:A:G	a	g	10:68263296	0.934167	-0.0681	0.338581	9.644e-16	68098183	68868604	770.421	1140	eQTL	chr10_68232096_A_G_b38	a	chr10_68232096_A_G_b38	ENSG00000179774.8	ATOH7		Brain_Cerebellar_Hemisphere	3.99968e-06	7.446e-15	0.338581	0.0704117	-0.0672	0.0086	OPPOSITE	0.590894	0.0942689	TRUE	TRUE
EUR	mocoRNFL_q1	chr10:68263296:A:G	chr10:68263296:A:G	a	g	10:68263296	0.934167	-0.0681	0.305169	9.644e-16	68098183	68868604	770.421	1140	eQTL	chr10_68240536_A_G_b38	a	chr10_68240536_A_G_b38	ENSG00000179774.8	ATOH7		Brain_Cerebellar_Hemisphere	3.26365e-05	2.569e-14	-0.305169	0.0709861	-0.0664	0.0087	SAME	0.0868759	0.0138598	TRUE	TRUE
EUR	mocoRNFL_q1	chr10:68263296:A:G	chr10:68263296:A:G	a	g	10:68263296	0.934167	-0.0681	0.305169	9.644e-16	68098183	68868604	770.421	1140	eQTL	chr10_68241124_C_T_b38	t	chr10_68241124_C_T_b38	ENSG00000179774.8	ATOH7		Brain_Cerebellar_Hemisphere	3.26365e-05	2.753e-14	-0.305169	0.0709861	0.0663	0.0087	OPPOSITE	0.0813508	0.0129784	TRUE	TRUE
EUR	mocoRNFL_q1	chr10:68263296:A:G	chr10:68263296:A:G	a	g	10:68263296	0.934167	-0.0681	0.305169	9.644e-16	68098183	68868604	770.421	1140	eQTL	chr10_68242636_A_T_b38	a	chr10_68242636_A_T_b38	ENSG00000179774.8	ATOH7		Brain_Cerebellar_Hemisphere	3.26365e-05	3.428e-14	-0.305169	0.0709861	-0.066	0.0087	SAME	0.0668396	0.0106633	TRUE	TRUE
EUR	mocoRNFL_q1	chr10:68263296:A:G	chr10:68263296:A:G	a	g	10:68263296	0.934167	-0.0681	0.337305	9.644e-16	68098183	68868604	770.421	1140	eQTL	chr10_68261045_G_A_b38	a	chr10_68261045_G_A_b38	ENSG00000233590.1	RP11-153K11.3		Artery_Tibial	2.18951e-12	1.999e-15	0.337305	0.0468655	0.0674	0.0085	SAME	0.389719	0.0108958	TRUE	TRUE
EUR	mocoRNFL_q1	chr14:60605940:G:A	chr14:60605940:G:A	a	g	14:60605940	1.04666	0.0456	0.143707	2.36e-08	60270263	61090338	820.075	732	eQTL	chr14_60419432_T_C_b38	t	chr14_60419432_T_C_b38	ENSG00000126773.12	PCNX4		Artery_Tibial	1.0488e-06	7.396e-08	0.143707	0.0290795	-0.0418	0.0078	OPPOSITE	0.432604	0.0136379	TRUE	TRUE
EUR	mocoRNFL_q1	chr8:108182372:CA:C	chr8:108182372:CA:C	ca	c	8:108182372	0.952848	-0.0483	0.554784	4.697e-08	107951768	108626098	674.33	893	sQTL	chr8_108239461_C_G_b38	c	chr8_108239461_C_G_b38	ENSG00000104408.9	EIF3E	chr8:108229195:108234998:clu_47884:ENSG00000104408.9	Brain_Caudate_basal_ganglia	4.2652e-08	0.007118	-0.554784	0.0966311	0.02	0.0074	OPPOSITE	0.205965	0.012121	FALSE	TRUE
EUR	mocoRNFL_q1	chr8:108182372:CA:C	chr8:108182372:CA:C	ca	c	8:108182372	0.952848	-0.0483	0.554784	4.697e-08	107951768	108626098	674.33	893	sQTL	chr8_108243503_C_T_b38	t	chr8_108243503_C_T_b38	ENSG00000104408.9	EIF3E	chr8:108229195:108234998:clu_47884:ENSG00000104408.9	Brain_Caudate_basal_ganglia	4.2652e-08	0.007118	-0.554784	0.0966311	-0.02	0.0074	SAME	0.205965	0.012121	FALSE	TRUE
EUR	mocoRNFL_q1	chr8:108182372:CA:C	chr8:108182372:CA:C	ca	c	8:108182372	0.952848	-0.0483	0.554784	4.697e-08	107951768	108626098	674.33	893	sQTL	chr8_108242977_C_T_b38	t	chr8_108242977_C_T_b38	ENSG00000104408.9	EIF3E	chr8:108229195:108234998:clu_47884:ENSG00000104408.9	Brain_Caudate_basal_ganglia	4.2652e-08	0.007189	-0.554784	0.0966311	-0.02	0.0074	SAME	0.205965	0.012121	FALSE	TRUE
EUR	mocoRNFL_q1	chr8:108182372:CA:C	chr8:108182372:CA:C	ca	c	8:108182372	0.952848	-0.0483	0.554784	4.697e-08	107951768	108626098	674.33	893	sQTL	chr8_108249551_G_T_b38	t	chr8_108249551_G_T_b38	ENSG00000104408.9	EIF3E	chr8:108229195:108234998:clu_47884:ENSG00000104408.9	Brain_Caudate_basal_ganglia	4.2652e-08	0.006963	-0.554784	0.0966311	-0.02	0.0074	SAME	0.186327	0.0109653	FALSE	TRUE
EUR	mocoRNFL_q1	chr8:108182372:CA:C	chr8:108182372:CA:C	ca	c	8:108182372	0.952848	-0.0483	0.706221	4.697e-08	107951768	108626098	674.33	893	sQTL	chr8_108239461_C_G_b38	c	chr8_108239461_C_G_b38	ENSG00000104408.9	EIF3E	chr8:108233672:108234998:clu_55068:ENSG00000104408.9	Artery_Aorta	1.76216e-35	0.007118	0.706221	0.0508232	0.02	0.0074	SAME	0.249402	0.0156246	FALSE	TRUE
EUR	mocoRNFL_q1	chr8:108182372:CA:C	chr8:108182372:CA:C	ca	c	8:108182372	0.952848	-0.0483	0.706221	4.697e-08	107951768	108626098	674.33	893	sQTL	chr8_108243503_C_T_b38	t	chr8_108243503_C_T_b38	ENSG00000104408.9	EIF3E	chr8:108233672:108234998:clu_55068:ENSG00000104408.9	Artery_Aorta	1.76216e-35	0.007118	0.706221	0.0508232	-0.02	0.0074	OPPOSITE	0.249402	0.0156246	FALSE	TRUE
EUR	mocoRNFL_q1	chr8:108182372:CA:C	chr8:108182372:CA:C	ca	c	8:108182372	0.952848	-0.0483	0.706221	4.697e-08	107951768	108626098	674.33	893	sQTL	chr8_108242977_C_T_b38	t	chr8_108242977_C_T_b38	ENSG00000104408.9	EIF3E	chr8:108233672:108234998:clu_55068:ENSG00000104408.9	Artery_Aorta	1.76216e-35	0.007189	0.706221	0.0508232	-0.02	0.0074	OPPOSITE	0.249402	0.0156246	FALSE	TRUE
EUR	autoRNFL_q6	chr10:68263296:A:G	chr10:68263296:A:G	a	g	10:68263296	0.916036	-0.0877	0.507797	4.624e-25	68098183	68868604	770.421	1235	eQTL	chr10_68281826_C_T_b38	t	chr10_68281826_C_T_b38	ENSG00000108187.15	PBLD		Brain_Putamen_basal_ganglia	7.36559e-18	8.339e-24	-0.507797	0.0506823	0.0879	0.0087	OPPOSITE	0.289079	0.0185523	TRUE	TRUE
EUR	autoRNFL_q6	chr10:68263296:A:G	chr10:68263296:A:G	a	g	10:68263296	0.916036	-0.0877	0.507797	4.624e-25	68098183	68868604	770.421	1235	eQTL	chr10_68281826_C_T_b38	t	chr10_68281826_C_T_b38	ENSG00000108187.15	PBLD		Brain_Putamen_basal_ganglia	7.36559e-18	8.339e-24	-0.507797	0.0506823	0.0879	0.0087	OPPOSITE	0.289079	0.0185523	TRUE	TRUE
EUR	autoRNFL_q6	chr10:68263296:A:G	chr10:68263296:A:G	a	g	10:68263296	0.916036	-0.0877	0.507797	4.624e-25	68098183	68868604	770.421	1235	eQTL	chr10_68280354_A_G_b38	a	chr10_68280354_A_G_b38	ENSG00000108187.15	PBLD		Brain_Putamen_basal_ganglia	7.36559e-18	7.529e-24	-0.507797	0.0506823	-0.0879	0.0087	SAME	0.289079	0.0185523	TRUE	TRUE
EUR	autoRNFL_q6	chr10:68263296:A:G	chr10:68263296:A:G	a	g	10:68263296	0.916036	-0.0877	0.507797	4.624e-25	68098183	68868604	770.421	1235	eQTL	chr10_68280354_A_G_b38	a	chr10_68280354_A_G_b38	ENSG00000108187.15	PBLD		Brain_Putamen_basal_ganglia	7.36559e-18	7.529e-24	-0.507797	0.0506823	-0.0879	0.0087	SAME	0.289079	0.0185523	TRUE	TRUE
EUR	autoRNFL_q6	chr10:68263296:A:G	chr10:68263296:A:G	a	g	10:68263296	0.916036	-0.0877	0.509245	4.624e-25	68098183	68868604	770.421	1235	eQTL	chr10_68284945_A_G_b38	a	chr10_68284945_A_G_b38	ENSG00000108187.15	PBLD		Brain_Putamen_basal_ganglia	4.26406e-18	5.516e-23	-0.509245	0.0503459	-0.0861	0.0087	SAME	0.239457	0.0153677	TRUE	TRUE
EUR	autoRNFL_q6	chr10:68263296:A:G	chr10:68263296:A:G	a	g	10:68263296	0.916036	-0.0877	0.509245	4.624e-25	68098183	68868604	770.421	1235	eQTL	chr10_68284945_A_G_b38	a	chr10_68284945_A_G_b38	ENSG00000108187.15	PBLD		Brain_Putamen_basal_ganglia	4.26406e-18	5.516e-23	-0.509245	0.0503459	-0.0861	0.0087	SAME	0.239457	0.0153677	TRUE	TRUE
EUR	autoRNFL_q6	chr10:68263296:A:G	chr10:68263296:A:G	a	g	10:68263296	0.916036	-0.0877	0.381502	4.624e-25	68098183	68868604	770.421	1235	eQTL	chr10_68261045_G_A_b38	a	chr10_68261045_G_A_b38	ENSG00000179774.8	ATOH7		Artery_Aorta	2.91814e-08	8.668e-25	0.381502	0.0670683	0.0873	0.0085	SAME	0.298968	0.0265551	TRUE	TRUE
EUR	autoRNFL_q6	chr10:68263296:A:G	chr10:68263296:A:G	a	g	10:68263296	0.916036	-0.0877	0.381502	4.624e-25	68098183	68868604	770.421	1235	eQTL	chr10_68261045_G_A_b38	a	chr10_68261045_G_A_b38	ENSG00000179774.8	ATOH7		Artery_Aorta	2.91814e-08	8.668e-25	0.381502	0.0670683	0.0873	0.0085	SAME	0.298968	0.0265551	TRUE	TRUE
EUR	autoRNFL_q6	chr10:68263296:A:G	chr10:68263296:A:G	a	g	10:68263296	0.916036	-0.0877	0.459313	4.624e-25	68098183	68868604	770.421	1235	eQTL	chr10_68284945_A_G_b38	a	chr10_68284945_A_G_b38	ENSG00000108187.15	PBLD		Brain_Amygdala	1.8199e-09	5.516e-23	-0.459313	0.0696577	-0.0861	0.0087	SAME	0.346328	0.0104164	TRUE	TRUE
EUR	autoRNFL_q6	chr10:68263296:A:G	chr10:68263296:A:G	a	g	10:68263296	0.916036	-0.0877	0.459313	4.624e-25	68098183	68868604	770.421	1235	eQTL	chr10_68284945_A_G_b38	a	chr10_68284945_A_G_b38	ENSG00000108187.15	PBLD		Brain_Amygdala	1.8199e-09	5.516e-23	-0.459313	0.0696577	-0.0861	0.0087	SAME	0.346328	0.0104164	TRUE	TRUE
EUR	autoRNFL_q6	chr10:68263296:A:G	chr10:68263296:A:G	a	g	10:68263296	0.916036	-0.0877	0.338581	4.624e-25	68098183	68868604	770.421	1235	eQTL	chr10_68232096_A_G_b38	a	chr10_68232096_A_G_b38	ENSG00000179774.8	ATOH7		Brain_Cerebellar_Hemisphere	3.99968e-06	8.592e-23	0.338581	0.0704117	-0.0851	0.0087	OPPOSITE	0.22693	0.0116865	TRUE	TRUE
EUR	autoRNFL_q6	chr10:68263296:A:G	chr10:68263296:A:G	a	g	10:68263296	0.916036	-0.0877	0.338581	4.624e-25	68098183	68868604	770.421	1235	eQTL	chr10_68232096_A_G_b38	a	chr10_68232096_A_G_b38	ENSG00000179774.8	ATOH7		Brain_Cerebellar_Hemisphere	3.99968e-06	8.592e-23	0.338581	0.0704117	-0.0851	0.0087	OPPOSITE	0.22693	0.0116865	TRUE	TRUE
EUR	autoRNFL_q6	chr10:68263296:A:G	chr10:68263296:A:G	a	g	10:68263296	0.916036	-0.0877	0.337305	4.624e-25	68098183	68868604	770.421	1235	eQTL	chr10_68261045_G_A_b38	a	chr10_68261045_G_A_b38	ENSG00000233590.1	RP11-153K11.3		Artery_Tibial	2.18951e-12	8.668e-25	0.337305	0.0468655	0.0873	0.0085	SAME	0.20001	0.010575	TRUE	TRUE
EUR	autoRNFL_q6	chr10:68263296:A:G	chr10:68263296:A:G	a	g	10:68263296	0.916036	-0.0877	0.337305	4.624e-25	68098183	68868604	770.421	1235	eQTL	chr10_68261045_G_A_b38	a	chr10_68261045_G_A_b38	ENSG00000233590.1	RP11-153K11.3		Artery_Tibial	2.18951e-12	8.668e-25	0.337305	0.0468655	0.0873	0.0085	SAME	0.20001	0.010575	TRUE	TRUE
EUR	autoRNFL_q6	chr10:68263296:A:G	chr10:68263296:A:G	a	g	10:68263296	0.916036	-0.0877	0.334823	4.624e-25	68098183	68868604	770.421	1235	eQTL	chr10_68281826_C_T_b38	t	chr10_68281826_C_T_b38	ENSG00000233590.1	RP11-153K11.3		Artery_Tibial	6.05149e-12	8.339e-24	0.334823	0.0475374	0.0879	0.0087	SAME	0.197284	0.0104309	TRUE	TRUE
EUR	autoRNFL_q6	chr10:68263296:A:G	chr10:68263296:A:G	a	g	10:68263296	0.916036	-0.0877	0.334823	4.624e-25	68098183	68868604	770.421	1235	eQTL	chr10_68281826_C_T_b38	t	chr10_68281826_C_T_b38	ENSG00000233590.1	RP11-153K11.3		Artery_Tibial	6.05149e-12	8.339e-24	0.334823	0.0475374	0.0879	0.0087	SAME	0.197284	0.0104309	TRUE	TRUE
EUR	autoRNFL_q6	chr10:68263296:A:G	chr10:68263296:A:G	a	g	10:68263296	0.916036	-0.0877	0.423767	4.624e-25	68098183	68868604	770.421	1235	eQTL	chr10_68281826_C_T_b38	t	chr10_68281826_C_T_b38	ENSG00000179774.8	ATOH7		Artery_Tibial	2.28763e-20	8.339e-24	0.423767	0.0439074	0.0879	0.0087	SAME	0.39907	0.0100313	TRUE	TRUE
EUR	autoRNFL_q6	chr10:68263296:A:G	chr10:68263296:A:G	a	g	10:68263296	0.916036	-0.0877	0.423767	4.624e-25	68098183	68868604	770.421	1235	eQTL	chr10_68281826_C_T_b38	t	chr10_68281826_C_T_b38	ENSG00000179774.8	ATOH7		Artery_Tibial	2.28763e-20	8.339e-24	0.423767	0.0439074	0.0879	0.0087	SAME	0.39907	0.0100313	TRUE	TRUE
EUR	autoRNFL_q6	chr10:68263296:A:G	chr10:68263296:A:G	a	g	10:68263296	0.916036	-0.0877	0.334823	4.624e-25	68098183	68868604	770.421	1235	eQTL	chr10_68280354_A_G_b38	a	chr10_68280354_A_G_b38	ENSG00000233590.1	RP11-153K11.3		Artery_Tibial	6.05149e-12	7.529e-24	0.334823	0.0475374	-0.0879	0.0087	OPPOSITE	0.197284	0.0104309	TRUE	TRUE
EUR	autoRNFL_q6	chr10:68263296:A:G	chr10:68263296:A:G	a	g	10:68263296	0.916036	-0.0877	0.334823	4.624e-25	68098183	68868604	770.421	1235	eQTL	chr10_68280354_A_G_b38	a	chr10_68280354_A_G_b38	ENSG00000233590.1	RP11-153K11.3		Artery_Tibial	6.05149e-12	7.529e-24	0.334823	0.0475374	-0.0879	0.0087	OPPOSITE	0.197284	0.0104309	TRUE	TRUE
EUR	autoRNFL_q6	chr10:68263296:A:G	chr10:68263296:A:G	a	g	10:68263296	0.916036	-0.0877	0.423767	4.624e-25	68098183	68868604	770.421	1235	eQTL	chr10_68280354_A_G_b38	a	chr10_68280354_A_G_b38	ENSG00000179774.8	ATOH7		Artery_Tibial	2.28763e-20	7.529e-24	0.423767	0.0439074	-0.0879	0.0087	OPPOSITE	0.39907	0.0100313	TRUE	TRUE
EUR	autoRNFL_q6	chr10:68263296:A:G	chr10:68263296:A:G	a	g	10:68263296	0.916036	-0.0877	0.423767	4.624e-25	68098183	68868604	770.421	1235	eQTL	chr10_68280354_A_G_b38	a	chr10_68280354_A_G_b38	ENSG00000179774.8	ATOH7		Artery_Tibial	2.28763e-20	7.529e-24	0.423767	0.0439074	-0.0879	0.0087	OPPOSITE	0.39907	0.0100313	TRUE	TRUE
EUR	autoRNFL_q6	chr10:68282613:C:G	chr10:68282613:C:G	c	g	10:68282613	0.927743	-0.075	0.507797	5.656e-15	68032613	68532613	500	1077	eQTL	chr10_68281826_C_T_b38	t	chr10_68281826_C_T_b38	ENSG00000108187.15	PBLD		Brain_Putamen_basal_ganglia	7.36559e-18	8.339e-24	-0.507797	0.0506823	0.0879	0.0087	OPPOSITE	0.287893	0.0185057	TRUE	TRUE
EUR	autoRNFL_q6	chr10:68282613:C:G	chr10:68282613:C:G	c	g	10:68282613	0.927743	-0.075	0.507797	5.656e-15	68032613	68532613	500	1077	eQTL	chr10_68280354_A_G_b38	a	chr10_68280354_A_G_b38	ENSG00000108187.15	PBLD		Brain_Putamen_basal_ganglia	7.36559e-18	7.529e-24	-0.507797	0.0506823	-0.0879	0.0087	SAME	0.287893	0.0185057	TRUE	TRUE
EUR	autoRNFL_q6	chr10:68282613:C:G	chr10:68282613:C:G	c	g	10:68282613	0.927743	-0.075	0.509245	5.656e-15	68032613	68532613	500	1077	eQTL	chr10_68284945_A_G_b38	a	chr10_68284945_A_G_b38	ENSG00000108187.15	PBLD		Brain_Putamen_basal_ganglia	4.26406e-18	5.516e-23	-0.509245	0.0503459	-0.0861	0.0087	SAME	0.237597	0.0152727	TRUE	TRUE
EUR	autoRNFL_q6	chr10:68282613:C:G	chr10:68282613:C:G	c	g	10:68282613	0.927743	-0.075	0.381502	5.656e-15	68032613	68532613	500	1077	eQTL	chr10_68261045_G_A_b38	a	chr10_68261045_G_A_b38	ENSG00000179774.8	ATOH7		Artery_Aorta	2.91814e-08	8.668e-25	0.381502	0.0670683	0.0873	0.0085	SAME	0.300365	0.0268285	TRUE	TRUE
EUR	autoRNFL_q6	chr10:68282613:C:G	chr10:68282613:C:G	c	g	10:68282613	0.927743	-0.075	0.459313	5.656e-15	68032613	68532613	500	1076	eQTL	chr10_68284945_A_G_b38	a	chr10_68284945_A_G_b38	ENSG00000108187.15	PBLD		Brain_Amygdala	1.8199e-09	5.516e-23	-0.459313	0.0696577	-0.0861	0.0087	SAME	0.347845	0.0104143	TRUE	TRUE
EUR	autoRNFL_q6	chr10:68282613:C:G	chr10:68282613:C:G	c	g	10:68282613	0.927743	-0.075	0.338581	5.656e-15	68032613	68532613	500	1077	eQTL	chr10_68232096_A_G_b38	a	chr10_68232096_A_G_b38	ENSG00000179774.8	ATOH7		Brain_Cerebellar_Hemisphere	3.99968e-06	8.592e-23	0.338581	0.0704117	-0.0851	0.0087	OPPOSITE	0.228931	0.0119349	TRUE	TRUE
EUR	autoRNFL_q6	chr10:68282613:C:G	chr10:68282613:C:G	c	g	10:68282613	0.927743	-0.075	0.337305	5.656e-15	68032613	68532613	500	1077	eQTL	chr10_68261045_G_A_b38	a	chr10_68261045_G_A_b38	ENSG00000233590.1	RP11-153K11.3		Artery_Tibial	2.18951e-12	8.668e-25	0.337305	0.0468655	0.0873	0.0085	SAME	0.199212	0.0105047	TRUE	TRUE
EUR	autoRNFL_q6	chr10:68282613:C:G	chr10:68282613:C:G	c	g	10:68282613	0.927743	-0.075	0.334823	5.656e-15	68032613	68532613	500	1077	eQTL	chr10_68281826_C_T_b38	t	chr10_68281826_C_T_b38	ENSG00000233590.1	RP11-153K11.3		Artery_Tibial	6.05149e-12	8.339e-24	0.334823	0.0475374	0.0879	0.0087	SAME	0.19786	0.0104334	TRUE	TRUE
EUR	autoRNFL_q6	chr10:68282613:C:G	chr10:68282613:C:G	c	g	10:68282613	0.927743	-0.075	0.334823	5.656e-15	68032613	68532613	500	1077	eQTL	chr10_68280354_A_G_b38	a	chr10_68280354_A_G_b38	ENSG00000233590.1	RP11-153K11.3		Artery_Tibial	6.05149e-12	7.529e-24	0.334823	0.0475374	-0.0879	0.0087	OPPOSITE	0.19786	0.0104334	TRUE	TRUE
EUR	autoRNFL_q6	chr10:68282614:T:G	chr10:68282614:T:G	t	g	10:68282614	0.920443	-0.0829	0.459313	2.254e-13	68032614	68532614	500	1076	eQTL	chr10_68284945_A_G_b38	a	chr10_68284945_A_G_b38	ENSG00000108187.15	PBLD		Brain_Amygdala	1.8199e-09	5.516e-23	-0.459313	0.0696577	-0.0861	0.0087	SAME	0.347845	0.0104143	TRUE	TRUE
EUR	autoRNFL_q6	chr10:68282614:T:G	chr10:68282614:T:G	t	g	10:68282614	0.920443	-0.0829	0.338581	2.254e-13	68032614	68532614	500	1077	eQTL	chr10_68232096_A_G_b38	a	chr10_68232096_A_G_b38	ENSG00000179774.8	ATOH7		Brain_Cerebellar_Hemisphere	3.99968e-06	8.592e-23	0.338581	0.0704117	-0.0851	0.0087	OPPOSITE	0.228931	0.0119349	TRUE	TRUE
EUR	autoRNFL_q6	chr10:68282614:T:G	chr10:68282614:T:G	t	g	10:68282614	0.920443	-0.0829	0.337305	2.254e-13	68032614	68532614	500	1077	eQTL	chr10_68261045_G_A_b38	a	chr10_68261045_G_A_b38	ENSG00000233590.1	RP11-153K11.3		Artery_Tibial	2.18951e-12	8.668e-25	0.337305	0.0468655	0.0873	0.0085	SAME	0.199212	0.0105047	TRUE	TRUE
EUR	autoRNFL_q6	chr10:68282614:T:G	chr10:68282614:T:G	t	g	10:68282614	0.920443	-0.0829	0.334823	2.254e-13	68032614	68532614	500	1077	eQTL	chr10_68281826_C_T_b38	t	chr10_68281826_C_T_b38	ENSG00000233590.1	RP11-153K11.3		Artery_Tibial	6.05149e-12	8.339e-24	0.334823	0.0475374	0.0879	0.0087	SAME	0.19786	0.0104334	TRUE	TRUE
EUR	autoRNFL_q6	chr10:68282614:T:G	chr10:68282614:T:G	t	g	10:68282614	0.920443	-0.0829	0.334823	2.254e-13	68032614	68532614	500	1077	eQTL	chr10_68280354_A_G_b38	a	chr10_68280354_A_G_b38	ENSG00000233590.1	RP11-153K11.3		Artery_Tibial	6.05149e-12	7.529e-24	0.334823	0.0475374	-0.0879	0.0087	OPPOSITE	0.19786	0.0104334	TRUE	TRUE
EUR	autoRNFL_q6	chr14:60341147:T:G	chr14:60341147:T:G	t	g	14:60341147	0.950089	-0.0512	0.145487	4.761e-11	60270263	61166622	896.359	720	eQTL	chr14_60509819_C_A_b38	a	chr14_60509819_C_A_b38	ENSG00000126773.12	PCNX4		Artery_Tibial	7.39096e-07	2.154e-10	-0.145487	0.0290225	0.0485	0.0076	OPPOSITE	0.347683	0.0259374	TRUE	TRUE
EUR	autoRNFL_q6	chr14:60341147:T:G	chr14:60341147:T:G	t	g	14:60341147	0.950089	-0.0512	0.145487	4.761e-11	60270263	61166622	896.359	720	eQTL	chr14_60509819_C_A_b38	a	chr14_60509819_C_A_b38	ENSG00000126773.12	PCNX4		Artery_Tibial	7.39096e-07	2.154e-10	-0.145487	0.0290225	0.0485	0.0076	OPPOSITE	0.347683	0.0259374	TRUE	TRUE
EUR	autoRNFL_q6	chr14:60341147:T:G	chr14:60341147:T:G	t	g	14:60341147	0.950089	-0.0512	0.144672	4.761e-11	60270263	61166622	896.359	720	eQTL	chr14_60537171_G_C_b38	c	chr14_60537171_G_C_b38	ENSG00000126773.12	PCNX4		Artery_Tibial	6.56723e-07	1.146e-10	-0.144672	0.0287236	0.0493	0.0076	OPPOSITE	0.176366	0.013157	TRUE	TRUE
EUR	autoRNFL_q6	chr14:60341147:T:G	chr14:60341147:T:G	t	g	14:60341147	0.950089	-0.0512	0.144672	4.761e-11	60270263	61166622	896.359	720	eQTL	chr14_60537171_G_C_b38	c	chr14_60537171_G_C_b38	ENSG00000126773.12	PCNX4		Artery_Tibial	6.56723e-07	1.146e-10	-0.144672	0.0287236	0.0493	0.0076	OPPOSITE	0.176366	0.013157	TRUE	TRUE
EUR	autoRNFL_q6	chr14:60341147:T:G	chr14:60341147:T:G	t	g	14:60341147	0.950089	-0.0512	0.143707	4.761e-11	60270263	61166622	896.359	720	eQTL	chr14_60419432_T_C_b38	t	chr14_60419432_T_C_b38	ENSG00000126773.12	PCNX4		Artery_Tibial	1.0488e-06	1.588e-09	0.143707	0.0290795	-0.0469	0.0078	OPPOSITE	0.150239	0.011208	TRUE	TRUE
EUR	autoRNFL_q6	chr14:60341147:T:G	chr14:60341147:T:G	t	g	14:60341147	0.950089	-0.0512	0.143707	4.761e-11	60270263	61166622	896.359	720	eQTL	chr14_60419432_T_C_b38	t	chr14_60419432_T_C_b38	ENSG00000126773.12	PCNX4		Artery_Tibial	1.0488e-06	1.588e-09	0.143707	0.0290795	-0.0469	0.0078	OPPOSITE	0.150239	0.011208	TRUE	TRUE
EUR	autoRNFL_q1	chr10:68254383:T:C	chr10:68254383:T:C	t	c	10:68254383	0.953134	-0.048	0.507797	1.483e-08	68098183	68868604	770.421	901	eQTL	chr10_68281826_C_T_b38	t	chr10_68281826_C_T_b38	ENSG00000108187.15	PBLD		Brain_Putamen_basal_ganglia	7.36559e-18	3.719e-08	-0.507797	0.0506823	0.0481	0.0087	OPPOSITE	0.240306	0.0104526	TRUE	TRUE
EUR	autoRNFL_q1	chr10:68254383:T:C	chr10:68254383:T:C	t	c	10:68254383	0.953134	-0.048	0.507797	1.483e-08	68098183	68868604	770.421	901	eQTL	chr10_68280354_A_G_b38	a	chr10_68280354_A_G_b38	ENSG00000108187.15	PBLD		Brain_Putamen_basal_ganglia	7.36559e-18	3.841e-08	-0.507797	0.0506823	-0.048	0.0087	SAME	0.230368	0.0100204	TRUE	TRUE
EUR	autoRNFL_q1	chr10:68254383:T:C	chr10:68254383:T:C	t	c	10:68254383	0.953134	-0.048	0.381502	1.483e-08	68098183	68868604	770.421	901	eQTL	chr10_68261045_G_A_b38	a	chr10_68261045_G_A_b38	ENSG00000179774.8	ATOH7		Artery_Aorta	2.91814e-08	2.291e-08	0.381502	0.0670683	0.0475	0.0085	SAME	0.379663	0.0221809	TRUE	TRUE
EUR	autoRNFL_q1	chr10:68254383:T:C	chr10:68254383:T:C	t	c	10:68254383	0.953134	-0.048	0.386088	1.483e-08	68098183	68868604	770.421	901	eQTL	chr10_68261741_A_G_b38	a	chr10_68261741_A_G_b38	ENSG00000179774.8	ATOH7		Artery_Aorta	2.61114e-08	2.469e-08	-0.386088	0.0676261	-0.0474	0.0085	SAME	0.213823	0.0124921	TRUE	TRUE
EUR	autoRNFL_q1	chr10:68254383:T:C	chr10:68254383:T:C	t	c	10:68254383	0.953134	-0.048	0.337305	1.483e-08	68098183	68868604	770.421	901	eQTL	chr10_68261045_G_A_b38	a	chr10_68261045_G_A_b38	ENSG00000233590.1	RP11-153K11.3		Artery_Tibial	2.18951e-12	2.291e-08	0.337305	0.0468655	0.0475	0.0085	SAME	0.276484	0.0146377	TRUE	TRUE
EUR	autoRNFL_q1	chr8:108170015:T:C	chr8:108170015:T:C	t	c	8:108170015	0.941011	-0.0608	0.194045	1.177e-12	107951768	108622515	670.747	1041	eQTL	chr8_108249551_G_T_b38	t	chr8_108249551_G_T_b38	ENSG00000104412.7	EMC2		Brain_Cerebellum	6.85656e-05	3.241e-05	0.194045	0.047529	-0.0309	0.0074	OPPOSITE	0.178172	0.0143627	TRUE	TRUE
EUR	autoRNFL_q1	chr8:108170015:T:C	chr8:108170015:T:C	t	c	8:108170015	0.941011	-0.0608	0.194045	1.177e-12	107951768	108622515	670.747	1041	eQTL	chr8_108239461_C_G_b38	c	chr8_108239461_C_G_b38	ENSG00000104412.7	EMC2		Brain_Cerebellum	6.85656e-05	3.382e-05	0.194045	0.047529	0.0308	0.0074	SAME	0.171643	0.0138363	TRUE	TRUE
EUR	autoRNFL_q1	chr8:108170015:T:C	chr8:108170015:T:C	t	c	8:108170015	0.941011	-0.0608	0.194045	1.177e-12	107951768	108622515	670.747	1041	eQTL	chr8_108242977_C_T_b38	t	chr8_108242977_C_T_b38	ENSG00000104412.7	EMC2		Brain_Cerebellum	6.85656e-05	3.395e-05	0.194045	0.047529	-0.0308	0.0074	OPPOSITE	0.171643	0.0138363	TRUE	TRUE
EUR	autoRNFL_q1	chr8:108170015:T:C	chr8:108170015:T:C	t	c	8:108170015	0.941011	-0.0608	0.194045	1.177e-12	107951768	108622515	670.747	1041	eQTL	chr8_108250067_T_C_b38	t	chr8_108250067_T_C_b38	ENSG00000104412.7	EMC2		Brain_Cerebellum	6.85656e-05	3.272e-05	0.194045	0.047529	0.0309	0.0074	SAME	0.169937	0.0136988	TRUE	TRUE
EUR	autoRNFL_q1	chr8:108170015:T:C	chr8:108170015:T:C	t	c	8:108170015	0.941011	-0.0608	0.194045	1.177e-12	107951768	108622515	670.747	1041	eQTL	chr8_108243503_C_T_b38	t	chr8_108243503_C_T_b38	ENSG00000104412.7	EMC2		Brain_Cerebellum	6.85656e-05	3.563e-05	0.194045	0.047529	-0.0307	0.0074	OPPOSITE	0.159697	0.0128734	TRUE	TRUE
EUR	autoRNFL_q1	chr8:108170015:T:C	chr8:108170015:T:C	t	c	8:108170015	0.941011	-0.0608	0.233057	1.177e-12	107951768	108622515	670.747	1041	eQTL	chr8_108249551_G_T_b38	t	chr8_108249551_G_T_b38	ENSG00000104408.9	EIF3E		Brain_Putamen_basal_ganglia	1.28681e-07	3.241e-05	-0.233057	0.0417015	-0.0309	0.0074	SAME	0.194684	0.0180164	TRUE	TRUE
EUR	autoRNFL_q1	chr8:108170015:T:C	chr8:108170015:T:C	t	c	8:108170015	0.941011	-0.0608	0.233057	1.177e-12	107951768	108622515	670.747	1041	eQTL	chr8_108239461_C_G_b38	c	chr8_108239461_C_G_b38	ENSG00000104408.9	EIF3E		Brain_Putamen_basal_ganglia	1.28681e-07	3.382e-05	-0.233057	0.0417015	0.0308	0.0074	OPPOSITE	0.19477	0.0180243	TRUE	TRUE
EUR	autoRNFL_q1	chr8:108170015:T:C	chr8:108170015:T:C	t	c	8:108170015	0.941011	-0.0608	0.233057	1.177e-12	107951768	108622515	670.747	1041	eQTL	chr8_108242977_C_T_b38	t	chr8_108242977_C_T_b38	ENSG00000104408.9	EIF3E		Brain_Putamen_basal_ganglia	1.28681e-07	3.395e-05	-0.233057	0.0417015	-0.0308	0.0074	SAME	0.19477	0.0180243	TRUE	TRUE
EUR	autoRNFL_q1	chr8:108170015:T:C	chr8:108170015:T:C	t	c	8:108170015	0.941011	-0.0608	0.233057	1.177e-12	107951768	108622515	670.747	1041	eQTL	chr8_108250067_T_C_b38	t	chr8_108250067_T_C_b38	ENSG00000104408.9	EIF3E		Brain_Putamen_basal_ganglia	1.28681e-07	3.272e-05	-0.233057	0.0417015	0.0309	0.0074	OPPOSITE	0.174646	0.016162	TRUE	TRUE
EUR	autoRNFL_q1	chr8:108170015:T:C	chr8:108170015:T:C	t	c	8:108170015	0.941011	-0.0608	0.233057	1.177e-12	107951768	108622515	670.747	1041	eQTL	chr8_108243503_C_T_b38	t	chr8_108243503_C_T_b38	ENSG00000104408.9	EIF3E		Brain_Putamen_basal_ganglia	1.28681e-07	3.563e-05	-0.233057	0.0417015	-0.0307	0.0074	SAME	0.181214	0.0167699	TRUE	TRUE
EUR	autoRNFL_q1	chr8:108170015:T:C	chr8:108170015:T:C	t	c	8:108170015	0.941011	-0.0608	0.616624	1.177e-12	107951768	108622515	670.747	1041	sQTL	chr8_108249551_G_T_b38	t	chr8_108249551_G_T_b38	ENSG00000104408.9	EIF3E	chr8:108233672:108234998:clu_41561:ENSG00000104408.9	Brain_Spinal_cord_cervical_c-1	1.79152e-08	3.241e-05	0.616624	0.100748	-0.0309	0.0074	OPPOSITE	0.165891	0.0104291	FALSE	TRUE
EUR	autoRNFL_q1	chr8:108170015:T:C	chr8:108170015:T:C	t	c	8:108170015	0.941011	-0.0608	0.616624	1.177e-12	107951768	108622515	670.747	1041	sQTL	chr8_108239461_C_G_b38	c	chr8_108239461_C_G_b38	ENSG00000104408.9	EIF3E	chr8:108233672:108234998:clu_41561:ENSG00000104408.9	Brain_Spinal_cord_cervical_c-1	1.79152e-08	3.382e-05	0.616624	0.100748	0.0308	0.0074	SAME	0.162681	0.0102273	FALSE	TRUE
EUR	autoRNFL_q1	chr8:108170015:T:C	chr8:108170015:T:C	t	c	8:108170015	0.941011	-0.0608	0.616624	1.177e-12	107951768	108622515	670.747	1041	sQTL	chr8_108242977_C_T_b38	t	chr8_108242977_C_T_b38	ENSG00000104408.9	EIF3E	chr8:108233672:108234998:clu_41561:ENSG00000104408.9	Brain_Spinal_cord_cervical_c-1	1.79152e-08	3.395e-05	0.616624	0.100748	-0.0308	0.0074	OPPOSITE	0.162681	0.0102273	FALSE	TRUE
EUR	autoRNFL_q1	chr8:108170015:T:C	chr8:108170015:T:C	t	c	8:108170015	0.941011	-0.0608	0.554784	1.177e-12	107951768	108622515	670.747	1041	sQTL	chr8_108249551_G_T_b38	t	chr8_108249551_G_T_b38	ENSG00000104408.9	EIF3E	chr8:108229195:108234998:clu_47884:ENSG00000104408.9	Brain_Caudate_basal_ganglia	4.2652e-08	3.241e-05	-0.554784	0.0966311	-0.0309	0.0074	SAME	0.201823	0.0350904	FALSE	TRUE
EUR	autoRNFL_q1	chr8:108170015:T:C	chr8:108170015:T:C	t	c	8:108170015	0.941011	-0.0608	0.554784	1.177e-12	107951768	108622515	670.747	1041	sQTL	chr8_108239461_C_G_b38	c	chr8_108239461_C_G_b38	ENSG00000104408.9	EIF3E	chr8:108229195:108234998:clu_47884:ENSG00000104408.9	Brain_Caudate_basal_ganglia	4.2652e-08	3.382e-05	-0.554784	0.0966311	0.0308	0.0074	OPPOSITE	0.211125	0.0367077	FALSE	TRUE
EUR	autoRNFL_q1	chr8:108170015:T:C	chr8:108170015:T:C	t	c	8:108170015	0.941011	-0.0608	0.554784	1.177e-12	107951768	108622515	670.747	1041	sQTL	chr8_108242977_C_T_b38	t	chr8_108242977_C_T_b38	ENSG00000104408.9	EIF3E	chr8:108229195:108234998:clu_47884:ENSG00000104408.9	Brain_Caudate_basal_ganglia	4.2652e-08	3.395e-05	-0.554784	0.0966311	-0.0308	0.0074	SAME	0.211125	0.0367077	FALSE	TRUE
EUR	autoRNFL_q1	chr8:108170015:T:C	chr8:108170015:T:C	t	c	8:108170015	0.941011	-0.0608	0.554784	1.177e-12	107951768	108622515	670.747	1041	sQTL	chr8_108250067_T_C_b38	t	chr8_108250067_T_C_b38	ENSG00000104408.9	EIF3E	chr8:108229195:108234998:clu_47884:ENSG00000104408.9	Brain_Caudate_basal_ganglia	4.2652e-08	3.272e-05	-0.554784	0.0966311	0.0309	0.0074	OPPOSITE	0.171651	0.0298444	FALSE	TRUE
EUR	autoRNFL_q1	chr8:108170015:T:C	chr8:108170015:T:C	t	c	8:108170015	0.941011	-0.0608	0.554784	1.177e-12	107951768	108622515	670.747	1041	sQTL	chr8_108243503_C_T_b38	t	chr8_108243503_C_T_b38	ENSG00000104408.9	EIF3E	chr8:108229195:108234998:clu_47884:ENSG00000104408.9	Brain_Caudate_basal_ganglia	4.2652e-08	3.563e-05	-0.554784	0.0966311	-0.0307	0.0074	SAME	0.196431	0.0341529	FALSE	TRUE
EUR	autoRNFL_q1	chr8:108170015:T:C	chr8:108170015:T:C	t	c	8:108170015	0.941011	-0.0608	0.706221	1.177e-12	107951768	108622515	670.747	1041	sQTL	chr8_108249551_G_T_b38	t	chr8_108249551_G_T_b38	ENSG00000104408.9	EIF3E	chr8:108233672:108234998:clu_55068:ENSG00000104408.9	Artery_Aorta	1.76216e-35	3.241e-05	0.706221	0.0508232	-0.0309	0.0074	OPPOSITE	0.168382	0.0319122	FALSE	TRUE
EUR	autoRNFL_q1	chr8:108170015:T:C	chr8:108170015:T:C	t	c	8:108170015	0.941011	-0.0608	0.706221	1.177e-12	107951768	108622515	670.747	1041	sQTL	chr8_108239461_C_G_b38	c	chr8_108239461_C_G_b38	ENSG00000104408.9	EIF3E	chr8:108233672:108234998:clu_55068:ENSG00000104408.9	Artery_Aorta	1.76216e-35	3.382e-05	0.706221	0.0508232	0.0308	0.0074	SAME	0.250987	0.0475676	FALSE	TRUE
EUR	autoRNFL_q1	chr8:108170015:T:C	chr8:108170015:T:C	t	c	8:108170015	0.941011	-0.0608	0.706221	1.177e-12	107951768	108622515	670.747	1041	sQTL	chr8_108242977_C_T_b38	t	chr8_108242977_C_T_b38	ENSG00000104408.9	EIF3E	chr8:108233672:108234998:clu_55068:ENSG00000104408.9	Artery_Aorta	1.76216e-35	3.395e-05	0.706221	0.0508232	-0.0308	0.0074	OPPOSITE	0.250987	0.0475676	FALSE	TRUE
EUR	autoRNFL_q1	chr8:108170015:T:C	chr8:108170015:T:C	t	c	8:108170015	0.941011	-0.0608	0.706221	1.177e-12	107951768	108622515	670.747	1041	sQTL	chr8_108250067_T_C_b38	t	chr8_108250067_T_C_b38	ENSG00000104408.9	EIF3E	chr8:108233672:108234998:clu_55068:ENSG00000104408.9	Artery_Aorta	1.76216e-35	3.272e-05	0.706221	0.0508232	0.0309	0.0074	SAME	0.092829	0.0175932	FALSE	TRUE
EUR	autoRNFL_q1	chr8:108170015:T:C	chr8:108170015:T:C	t	c	8:108170015	0.941011	-0.0608	0.706221	1.177e-12	107951768	108622515	670.747	1041	sQTL	chr8_108243503_C_T_b38	t	chr8_108243503_C_T_b38	ENSG00000104408.9	EIF3E	chr8:108233672:108234998:clu_55068:ENSG00000104408.9	Artery_Aorta	1.76216e-35	3.563e-05	0.706221	0.0508232	-0.0307	0.0074	OPPOSITE	0.233519	0.044257	FALSE	TRUE
EUR	autoRNFL_q1	chr8:108182306:CA:C	chr8:108182306:CA:C	ca	c	8:108182306	0.953992	-0.0471	0.194045	1.019e-09	107808895	108626011	817.116	1064	eQTL	chr8_108249551_G_T_b38	t	chr8_108249551_G_T_b38	ENSG00000104412.7	EMC2		Brain_Cerebellum	6.85656e-05	3.241e-05	0.194045	0.047529	-0.0309	0.0074	OPPOSITE	0.178172	0.0143626	TRUE	TRUE
EUR	autoRNFL_q1	chr8:108182306:CA:C	chr8:108182306:CA:C	ca	c	8:108182306	0.953992	-0.0471	0.194045	1.019e-09	107808895	108626011	817.116	1064	eQTL	chr8_108239461_C_G_b38	c	chr8_108239461_C_G_b38	ENSG00000104412.7	EMC2		Brain_Cerebellum	6.85656e-05	3.382e-05	0.194045	0.047529	0.0308	0.0074	SAME	0.171643	0.0138363	TRUE	TRUE
EUR	autoRNFL_q1	chr8:108182306:CA:C	chr8:108182306:CA:C	ca	c	8:108182306	0.953992	-0.0471	0.194045	1.019e-09	107808895	108626011	817.116	1064	eQTL	chr8_108242977_C_T_b38	t	chr8_108242977_C_T_b38	ENSG00000104412.7	EMC2		Brain_Cerebellum	6.85656e-05	3.395e-05	0.194045	0.047529	-0.0308	0.0074	OPPOSITE	0.171643	0.0138363	TRUE	TRUE
EUR	autoRNFL_q1	chr8:108182306:CA:C	chr8:108182306:CA:C	ca	c	8:108182306	0.953992	-0.0471	0.194045	1.019e-09	107808895	108626011	817.116	1064	eQTL	chr8_108250067_T_C_b38	t	chr8_108250067_T_C_b38	ENSG00000104412.7	EMC2		Brain_Cerebellum	6.85656e-05	3.272e-05	0.194045	0.047529	0.0309	0.0074	SAME	0.169937	0.0136987	TRUE	TRUE
EUR	autoRNFL_q1	chr8:108182306:CA:C	chr8:108182306:CA:C	ca	c	8:108182306	0.953992	-0.0471	0.194045	1.019e-09	107808895	108626011	817.116	1064	eQTL	chr8_108243503_C_T_b38	t	chr8_108243503_C_T_b38	ENSG00000104412.7	EMC2		Brain_Cerebellum	6.85656e-05	3.563e-05	0.194045	0.047529	-0.0307	0.0074	OPPOSITE	0.159697	0.0128732	TRUE	TRUE
EUR	autoRNFL_q1	chr8:108182306:CA:C	chr8:108182306:CA:C	ca	c	8:108182306	0.953992	-0.0471	0.233057	1.019e-09	107808895	108626011	817.116	1064	eQTL	chr8_108249551_G_T_b38	t	chr8_108249551_G_T_b38	ENSG00000104408.9	EIF3E		Brain_Putamen_basal_ganglia	1.28681e-07	3.241e-05	-0.233057	0.0417015	-0.0309	0.0074	SAME	0.194684	0.0180163	TRUE	TRUE
EUR	autoRNFL_q1	chr8:108182306:CA:C	chr8:108182306:CA:C	ca	c	8:108182306	0.953992	-0.0471	0.233057	1.019e-09	107808895	108626011	817.116	1064	eQTL	chr8_108239461_C_G_b38	c	chr8_108239461_C_G_b38	ENSG00000104408.9	EIF3E		Brain_Putamen_basal_ganglia	1.28681e-07	3.382e-05	-0.233057	0.0417015	0.0308	0.0074	OPPOSITE	0.19477	0.0180242	TRUE	TRUE
EUR	autoRNFL_q1	chr8:108182306:CA:C	chr8:108182306:CA:C	ca	c	8:108182306	0.953992	-0.0471	0.233057	1.019e-09	107808895	108626011	817.116	1064	eQTL	chr8_108242977_C_T_b38	t	chr8_108242977_C_T_b38	ENSG00000104408.9	EIF3E		Brain_Putamen_basal_ganglia	1.28681e-07	3.395e-05	-0.233057	0.0417015	-0.0308	0.0074	SAME	0.19477	0.0180242	TRUE	TRUE
EUR	autoRNFL_q1	chr8:108182306:CA:C	chr8:108182306:CA:C	ca	c	8:108182306	0.953992	-0.0471	0.233057	1.019e-09	107808895	108626011	817.116	1064	eQTL	chr8_108250067_T_C_b38	t	chr8_108250067_T_C_b38	ENSG00000104408.9	EIF3E		Brain_Putamen_basal_ganglia	1.28681e-07	3.272e-05	-0.233057	0.0417015	0.0309	0.0074	OPPOSITE	0.174646	0.0161619	TRUE	TRUE
EUR	autoRNFL_q1	chr8:108182306:CA:C	chr8:108182306:CA:C	ca	c	8:108182306	0.953992	-0.0471	0.233057	1.019e-09	107808895	108626011	817.116	1064	eQTL	chr8_108243503_C_T_b38	t	chr8_108243503_C_T_b38	ENSG00000104408.9	EIF3E		Brain_Putamen_basal_ganglia	1.28681e-07	3.563e-05	-0.233057	0.0417015	-0.0307	0.0074	SAME	0.181213	0.0167697	TRUE	TRUE
EUR	autoRNFL_q1	chr8:108182306:CA:C	chr8:108182306:CA:C	ca	c	8:108182306	0.953992	-0.0471	0.616624	1.019e-09	107808895	108626011	817.116	1064	sQTL	chr8_108249551_G_T_b38	t	chr8_108249551_G_T_b38	ENSG00000104408.9	EIF3E	chr8:108233672:108234998:clu_41561:ENSG00000104408.9	Brain_Spinal_cord_cervical_c-1	1.79152e-08	3.241e-05	0.616624	0.100748	-0.0309	0.0074	OPPOSITE	0.165891	0.010429	FALSE	TRUE
EUR	autoRNFL_q1	chr8:108182306:CA:C	chr8:108182306:CA:C	ca	c	8:108182306	0.953992	-0.0471	0.616624	1.019e-09	107808895	108626011	817.116	1064	sQTL	chr8_108239461_C_G_b38	c	chr8_108239461_C_G_b38	ENSG00000104408.9	EIF3E	chr8:108233672:108234998:clu_41561:ENSG00000104408.9	Brain_Spinal_cord_cervical_c-1	1.79152e-08	3.382e-05	0.616624	0.100748	0.0308	0.0074	SAME	0.162681	0.0102273	FALSE	TRUE
EUR	autoRNFL_q1	chr8:108182306:CA:C	chr8:108182306:CA:C	ca	c	8:108182306	0.953992	-0.0471	0.616624	1.019e-09	107808895	108626011	817.116	1064	sQTL	chr8_108242977_C_T_b38	t	chr8_108242977_C_T_b38	ENSG00000104408.9	EIF3E	chr8:108233672:108234998:clu_41561:ENSG00000104408.9	Brain_Spinal_cord_cervical_c-1	1.79152e-08	3.395e-05	0.616624	0.100748	-0.0308	0.0074	OPPOSITE	0.162681	0.0102273	FALSE	TRUE
EUR	autoRNFL_q1	chr8:108182306:CA:C	chr8:108182306:CA:C	ca	c	8:108182306	0.953992	-0.0471	0.554784	1.019e-09	107808895	108626011	817.116	1064	sQTL	chr8_108249551_G_T_b38	t	chr8_108249551_G_T_b38	ENSG00000104408.9	EIF3E	chr8:108229195:108234998:clu_47884:ENSG00000104408.9	Brain_Caudate_basal_ganglia	4.2652e-08	3.241e-05	-0.554784	0.0966311	-0.0309	0.0074	SAME	0.201823	0.0350902	FALSE	TRUE
EUR	autoRNFL_q1	chr8:108182306:CA:C	chr8:108182306:CA:C	ca	c	8:108182306	0.953992	-0.0471	0.554784	1.019e-09	107808895	108626011	817.116	1064	sQTL	chr8_108239461_C_G_b38	c	chr8_108239461_C_G_b38	ENSG00000104408.9	EIF3E	chr8:108229195:108234998:clu_47884:ENSG00000104408.9	Brain_Caudate_basal_ganglia	4.2652e-08	3.382e-05	-0.554784	0.0966311	0.0308	0.0074	OPPOSITE	0.211125	0.0367075	FALSE	TRUE
EUR	autoRNFL_q1	chr8:108182306:CA:C	chr8:108182306:CA:C	ca	c	8:108182306	0.953992	-0.0471	0.554784	1.019e-09	107808895	108626011	817.116	1064	sQTL	chr8_108242977_C_T_b38	t	chr8_108242977_C_T_b38	ENSG00000104408.9	EIF3E	chr8:108229195:108234998:clu_47884:ENSG00000104408.9	Brain_Caudate_basal_ganglia	4.2652e-08	3.395e-05	-0.554784	0.0966311	-0.0308	0.0074	SAME	0.211125	0.0367075	FALSE	TRUE
EUR	autoRNFL_q1	chr8:108182306:CA:C	chr8:108182306:CA:C	ca	c	8:108182306	0.953992	-0.0471	0.554784	1.019e-09	107808895	108626011	817.116	1064	sQTL	chr8_108250067_T_C_b38	t	chr8_108250067_T_C_b38	ENSG00000104408.9	EIF3E	chr8:108229195:108234998:clu_47884:ENSG00000104408.9	Brain_Caudate_basal_ganglia	4.2652e-08	3.272e-05	-0.554784	0.0966311	0.0309	0.0074	OPPOSITE	0.171651	0.0298442	FALSE	TRUE
EUR	autoRNFL_q1	chr8:108182306:CA:C	chr8:108182306:CA:C	ca	c	8:108182306	0.953992	-0.0471	0.554784	1.019e-09	107808895	108626011	817.116	1064	sQTL	chr8_108243503_C_T_b38	t	chr8_108243503_C_T_b38	ENSG00000104408.9	EIF3E	chr8:108229195:108234998:clu_47884:ENSG00000104408.9	Brain_Caudate_basal_ganglia	4.2652e-08	3.563e-05	-0.554784	0.0966311	-0.0307	0.0074	SAME	0.19643	0.0341525	FALSE	TRUE
EUR	autoRNFL_q1	chr8:108182306:CA:C	chr8:108182306:CA:C	ca	c	8:108182306	0.953992	-0.0471	0.706221	1.019e-09	107808895	108626011	817.116	1064	sQTL	chr8_108249551_G_T_b38	t	chr8_108249551_G_T_b38	ENSG00000104408.9	EIF3E	chr8:108233672:108234998:clu_55068:ENSG00000104408.9	Artery_Aorta	1.76216e-35	3.241e-05	0.706221	0.0508232	-0.0309	0.0074	OPPOSITE	0.168383	0.0319121	FALSE	TRUE
EUR	autoRNFL_q1	chr8:108182306:CA:C	chr8:108182306:CA:C	ca	c	8:108182306	0.953992	-0.0471	0.706221	1.019e-09	107808895	108626011	817.116	1064	sQTL	chr8_108239461_C_G_b38	c	chr8_108239461_C_G_b38	ENSG00000104408.9	EIF3E	chr8:108233672:108234998:clu_55068:ENSG00000104408.9	Artery_Aorta	1.76216e-35	3.382e-05	0.706221	0.0508232	0.0308	0.0074	SAME	0.250987	0.0475674	FALSE	TRUE
EUR	autoRNFL_q1	chr8:108182306:CA:C	chr8:108182306:CA:C	ca	c	8:108182306	0.953992	-0.0471	0.706221	1.019e-09	107808895	108626011	817.116	1064	sQTL	chr8_108242977_C_T_b38	t	chr8_108242977_C_T_b38	ENSG00000104408.9	EIF3E	chr8:108233672:108234998:clu_55068:ENSG00000104408.9	Artery_Aorta	1.76216e-35	3.395e-05	0.706221	0.0508232	-0.0308	0.0074	OPPOSITE	0.250987	0.0475674	FALSE	TRUE
EUR	autoRNFL_q1	chr8:108182306:CA:C	chr8:108182306:CA:C	ca	c	8:108182306	0.953992	-0.0471	0.706221	1.019e-09	107808895	108626011	817.116	1064	sQTL	chr8_108250067_T_C_b38	t	chr8_108250067_T_C_b38	ENSG00000104408.9	EIF3E	chr8:108233672:108234998:clu_55068:ENSG00000104408.9	Artery_Aorta	1.76216e-35	3.272e-05	0.706221	0.0508232	0.0309	0.0074	SAME	0.0928291	0.0175931	FALSE	TRUE
EUR	autoRNFL_q1	chr8:108182306:CA:C	chr8:108182306:CA:C	ca	c	8:108182306	0.953992	-0.0471	0.706221	1.019e-09	107808895	108626011	817.116	1064	sQTL	chr8_108243503_C_T_b38	t	chr8_108243503_C_T_b38	ENSG00000104408.9	EIF3E	chr8:108233672:108234998:clu_55068:ENSG00000104408.9	Artery_Aorta	1.76216e-35	3.563e-05	0.706221	0.0508232	-0.0307	0.0074	OPPOSITE	0.233518	0.0442565	FALSE	TRUE
EUR	autoRNFL_q1	chr8:108246284:TGGG:T	chr8:108246284:TGGG:T	t	tggg	8:108246284	1.04959	0.0484	0.194045	2.569e-09	107659964	109145959	1485.99	1168	eQTL	chr8_108249551_G_T_b38	t	chr8_108249551_G_T_b38	ENSG00000104412.7	EMC2		Brain_Cerebellum	6.85656e-05	3.241e-05	0.194045	0.047529	-0.0309	0.0074	OPPOSITE	0.177125	0.0144445	TRUE	TRUE
EUR	autoRNFL_q1	chr8:108246284:TGGG:T	chr8:108246284:TGGG:T	t	tggg	8:108246284	1.04959	0.0484	0.194045	2.569e-09	107659964	109145959	1485.99	1168	eQTL	chr8_108239461_C_G_b38	c	chr8_108239461_C_G_b38	ENSG00000104412.7	EMC2		Brain_Cerebellum	6.85656e-05	3.382e-05	0.194045	0.047529	0.0308	0.0074	SAME	0.170617	0.0139137	TRUE	TRUE
EUR	autoRNFL_q1	chr8:108246284:TGGG:T	chr8:108246284:TGGG:T	t	tggg	8:108246284	1.04959	0.0484	0.194045	2.569e-09	107659964	109145959	1485.99	1168	eQTL	chr8_108242977_C_T_b38	t	chr8_108242977_C_T_b38	ENSG00000104412.7	EMC2		Brain_Cerebellum	6.85656e-05	3.395e-05	0.194045	0.047529	-0.0308	0.0074	OPPOSITE	0.170617	0.0139137	TRUE	TRUE
EUR	autoRNFL_q1	chr8:108246284:TGGG:T	chr8:108246284:TGGG:T	t	tggg	8:108246284	1.04959	0.0484	0.194045	2.569e-09	107659964	109145959	1485.99	1168	eQTL	chr8_108250067_T_C_b38	t	chr8_108250067_T_C_b38	ENSG00000104412.7	EMC2		Brain_Cerebellum	6.85656e-05	3.272e-05	0.194045	0.047529	0.0309	0.0074	SAME	0.169275	0.0138043	TRUE	TRUE
EUR	autoRNFL_q1	chr8:108246284:TGGG:T	chr8:108246284:TGGG:T	t	tggg	8:108246284	1.04959	0.0484	0.194045	2.569e-09	107659964	109145959	1485.99	1168	eQTL	chr8_108243503_C_T_b38	t	chr8_108243503_C_T_b38	ENSG00000104412.7	EMC2		Brain_Cerebellum	6.85656e-05	3.563e-05	0.194045	0.047529	-0.0307	0.0074	OPPOSITE	0.158941	0.0129616	TRUE	TRUE
EUR	autoRNFL_q1	chr8:108246284:TGGG:T	chr8:108246284:TGGG:T	t	tggg	8:108246284	1.04959	0.0484	0.233057	2.569e-09	107659964	109145959	1485.99	1168	eQTL	chr8_108249551_G_T_b38	t	chr8_108249551_G_T_b38	ENSG00000104408.9	EIF3E		Brain_Putamen_basal_ganglia	1.28681e-07	3.241e-05	-0.233057	0.0417015	-0.0309	0.0074	SAME	0.193967	0.0176635	TRUE	TRUE
EUR	autoRNFL_q1	chr8:108246284:TGGG:T	chr8:108246284:TGGG:T	t	tggg	8:108246284	1.04959	0.0484	0.233057	2.569e-09	107659964	109145959	1485.99	1168	eQTL	chr8_108239461_C_G_b38	c	chr8_108239461_C_G_b38	ENSG00000104408.9	EIF3E		Brain_Putamen_basal_ganglia	1.28681e-07	3.382e-05	-0.233057	0.0417015	0.0308	0.0074	OPPOSITE	0.193857	0.0176534	TRUE	TRUE
EUR	autoRNFL_q1	chr8:108246284:TGGG:T	chr8:108246284:TGGG:T	t	tggg	8:108246284	1.04959	0.0484	0.233057	2.569e-09	107659964	109145959	1485.99	1168	eQTL	chr8_108242977_C_T_b38	t	chr8_108242977_C_T_b38	ENSG00000104408.9	EIF3E		Brain_Putamen_basal_ganglia	1.28681e-07	3.395e-05	-0.233057	0.0417015	-0.0308	0.0074	SAME	0.193857	0.0176534	TRUE	TRUE
EUR	autoRNFL_q1	chr8:108246284:TGGG:T	chr8:108246284:TGGG:T	t	tggg	8:108246284	1.04959	0.0484	0.233057	2.569e-09	107659964	109145959	1485.99	1168	eQTL	chr8_108250067_T_C_b38	t	chr8_108250067_T_C_b38	ENSG00000104408.9	EIF3E		Brain_Putamen_basal_ganglia	1.28681e-07	3.272e-05	-0.233057	0.0417015	0.0309	0.0074	OPPOSITE	0.174591	0.015899	TRUE	TRUE
EUR	autoRNFL_q1	chr8:108246284:TGGG:T	chr8:108246284:TGGG:T	t	tggg	8:108246284	1.04959	0.0484	0.233057	2.569e-09	107659964	109145959	1485.99	1168	eQTL	chr8_108243503_C_T_b38	t	chr8_108243503_C_T_b38	ENSG00000104408.9	EIF3E		Brain_Putamen_basal_ganglia	1.28681e-07	3.563e-05	-0.233057	0.0417015	-0.0307	0.0074	SAME	0.180591	0.0164454	TRUE	TRUE
EUR	autoGCC_q6	chr17:81619201:TA:T	chr17:81619201:TA:T	t	ta	17:81619201	0.951896	-0.0493	0.899896	4.088e-10	81418853	81779444	360.591	473	eQTL	chr17_81647906_T_TTAAC_b38	t	chr17_81647906_T_TTAAC_b38	ENSG00000182612.10	TSPAN10		Brain_Cerebellum	1.07739e-26	1.563e-09	-0.899896	0.070239	-0.0476	0.0079	SAME	0.651341	1	TRUE	TRUE
EUR	autoGCC_q6	chr17:81619201:TA:T	chr17:81619201:TA:T	t	ta	17:81619201	0.951896	-0.0493	0.907844	4.088e-10	81418853	81779444	360.591	473	eQTL	chr17_81648542_A_G_b38	a	chr17_81648542_A_G_b38	ENSG00000182612.10	TSPAN10		Brain_Cerebellum	5.94634e-27	2.136e-09	0.907844	0.0703601	0.0471	0.0079	SAME	0.348659	0.535295	TRUE	TRUE
EUR	autoGCC_q6	chr17:81619201:TA:T	chr17:81619201:TA:T	t	ta	17:81619201	0.951896	-0.0493	0.352481	4.088e-10	81418853	81779444	360.591	473	eQTL	chr17_81647906_T_TTAAC_b38	t	chr17_81647906_T_TTAAC_b38	ENSG00000182612.10	TSPAN10		Brain_Nucleus_accumbens_basal_ganglia	5.67818e-06	1.563e-09	-0.352481	0.0750955	-0.0476	0.0079	SAME	0.66205	0.920186	TRUE	TRUE
EUR	autoGCC_q6	chr17:81619201:TA:T	chr17:81619201:TA:T	t	ta	17:81619201	0.951896	-0.0493	0.345183	4.088e-10	81418853	81779444	360.591	473	eQTL	chr17_81648542_A_G_b38	a	chr17_81648542_A_G_b38	ENSG00000182612.10	TSPAN10		Brain_Nucleus_accumbens_basal_ganglia	1.03007e-05	2.136e-09	0.345183	0.0757988	0.0471	0.0079	SAME	0.332751	0.462492	TRUE	TRUE
EUR	autoGCC_q6	chr17:81619201:TA:T	chr17:81619201:TA:T	t	ta	17:81619201	0.951896	-0.0493	0.897679	4.088e-10	81418853	81779444	360.591	473	eQTL	chr17_81632415_T_C_b38	t	chr17_81632415_T_C_b38	ENSG00000182612.10	TSPAN10		Brain_Cerebellar_Hemisphere	1.04962e-25	8.382e-10	0.897679	0.0687512	0.0484	0.0079	SAME	0.478735	0.0317225	TRUE	TRUE
EUR	autoGCC_q6	chr17:81619201:TA:T	chr17:81619201:TA:T	t	ta	17:81619201	0.951896	-0.0493	0.897679	4.088e-10	81418853	81779444	360.591	473	eQTL	chr17_81635037_G_T_b38	t	chr17_81635037_G_T_b38	ENSG00000182612.10	TSPAN10		Brain_Cerebellar_Hemisphere	1.04962e-25	1.113e-09	0.897679	0.0687512	-0.048	0.0079	OPPOSITE	0.195529	0.0129563	TRUE	TRUE
EUR	autoGCC_q6	chr17:81619201:TA:T	chr17:81619201:TA:T	t	ta	17:81619201	0.951896	-0.0493	0.897679	4.088e-10	81418853	81779444	360.591	473	eQTL	chr17_81616447_T_C_b38	t	chr17_81616447_T_C_b38	ENSG00000182612.10	TSPAN10		Brain_Cerebellar_Hemisphere	1.04962e-25	1.246e-09	0.897679	0.0687512	0.0479	0.0079	SAME	0.156416	0.0103646	TRUE	TRUE
EUR	autoGCC_q6	chr17:81619201:TA:T	chr17:81619201:TA:T	t	ta	17:81619201	0.951896	-0.0493	0.486338	4.088e-10	81418853	81779444	360.591	473	eQTL	chr17_81632415_T_C_b38	t	chr17_81632415_T_C_b38	ENSG00000182612.10	TSPAN10		Brain_Cortex	2.54469e-09	8.382e-10	0.486338	0.077143	0.0484	0.0079	SAME	0.411241	0.0181513	TRUE	TRUE
EUR	autoRNFL_q7	chr20:14556216:T:C	chr20:14556216:T:C	t	c	20:14556216	1.05054	0.0493	0.127611	3.823e-09	14177203	14996199	818.996	494	eQTL	chr20_14377471_T_C_b38	t	chr20_14377471_T_C_b38	ENSG00000101247.17	NDUFAF5		Artery_Tibial	0.000100445	0.001659	-0.127611	0.0325517	0.0241	0.0077	OPPOSITE	0.839582	0.014634	TRUE	TRUE
EUR	autoGCC_q8	chr17:81562724:G:A	chr17:81562724:G:A	a	g	17:81562724	1.06855	0.0663	0.899896	1.015e-08	81413132	81772846	359.714	522	eQTL	chr17_81647906_T_TTAAC_b38	t	chr17_81647906_T_TTAAC_b38	ENSG00000182612.10	TSPAN10		Brain_Cerebellum	1.07739e-26	1.711e-15	-0.899896	0.070239	-0.0621	0.0078	SAME	0.805989	0.999997	TRUE	TRUE
EUR	autoGCC_q8	chr17:81562724:G:A	chr17:81562724:G:A	a	g	17:81562724	1.06855	0.0663	0.907844	1.015e-08	81413132	81772846	359.714	522	eQTL	chr17_81648542_A_G_b38	a	chr17_81648542_A_G_b38	ENSG00000182612.10	TSPAN10		Brain_Cerebellum	5.94634e-27	8.005e-15	0.907844	0.0703601	0.0606	0.0078	SAME	0.194011	0.240711	TRUE	TRUE
EUR	autoGCC_q8	chr17:81562724:G:A	chr17:81562724:G:A	a	g	17:81562724	1.06855	0.0663	0.352481	1.015e-08	81413132	81772846	359.714	522	eQTL	chr17_81647906_T_TTAAC_b38	t	chr17_81647906_T_TTAAC_b38	ENSG00000182612.10	TSPAN10		Brain_Nucleus_accumbens_basal_ganglia	5.67818e-06	1.711e-15	-0.352481	0.0750955	-0.0621	0.0078	SAME	0.794316	0.508428	TRUE	TRUE
EUR	autoGCC_q8	chr17:81562724:G:A	chr17:81562724:G:A	a	g	17:81562724	1.06855	0.0663	0.345183	1.015e-08	81413132	81772846	359.714	522	eQTL	chr17_81648542_A_G_b38	a	chr17_81648542_A_G_b38	ENSG00000182612.10	TSPAN10		Brain_Nucleus_accumbens_basal_ganglia	1.03007e-05	8.005e-15	0.345183	0.0757988	0.0606	0.0078	SAME	0.11717	0.0749988	TRUE	TRUE
EUR	autoGCC_q8	chr17:81562724:G:A	chr17:81562724:G:A	a	g	17:81562724	1.06855	0.0663	0.33138	1.015e-08	81413132	81772846	359.714	522	eQTL	chr17_81644245_A_G_b38	a	chr17_81644245_A_G_b38	ENSG00000182612.10	TSPAN10		Brain_Nucleus_accumbens_basal_ganglia	2.20528e-05	2.92e-15	0.33138	0.0758178	0.0616	0.0078	SAME	0.0190017	0.0121626	TRUE	TRUE
EUR	autoGCC_q8	chr17:81562724:G:A	chr17:81562724:G:A	a	g	17:81562724	1.06855	0.0663	0.33138	1.015e-08	81413132	81772846	359.714	522	eQTL	chr17_81645371_A_G_b38	a	chr17_81645371_A_G_b38	ENSG00000182612.10	TSPAN10		Brain_Nucleus_accumbens_basal_ganglia	2.20528e-05	2.997e-15	0.33138	0.0758178	0.0616	0.0078	SAME	0.0190017	0.0121626	TRUE	TRUE
EUR	autoGCC_q8	chr17:81562724:G:A	chr17:81562724:G:A	a	g	17:81562724	1.06855	0.0663	0.897679	1.015e-08	81413132	81772846	359.714	522	eQTL	chr17_81644245_A_G_b38	a	chr17_81644245_A_G_b38	ENSG00000182612.10	TSPAN10		Brain_Cerebellar_Hemisphere	1.04962e-25	2.92e-15	0.897679	0.0687512	0.0616	0.0078	SAME	0.21407	0.0230958	TRUE	TRUE
EUR	autoGCC_q8	chr17:81562724:G:A	chr17:81562724:G:A	a	g	17:81562724	1.06855	0.0663	0.897679	1.015e-08	81413132	81772846	359.714	522	eQTL	chr17_81645371_A_G_b38	a	chr17_81645371_A_G_b38	ENSG00000182612.10	TSPAN10		Brain_Cerebellar_Hemisphere	1.04962e-25	2.997e-15	0.897679	0.0687512	0.0616	0.0078	SAME	0.21407	0.0230958	TRUE	TRUE
EUR	autoGCC_q8	chr17:81562724:G:A	chr17:81562724:G:A	a	g	17:81562724	1.06855	0.0663	0.897679	1.015e-08	81413132	81772846	359.714	522	eQTL	chr17_81597516_G_A_b38	a	chr17_81597516_G_A_b38	ENSG00000182612.10	TSPAN10		Brain_Cerebellar_Hemisphere	1.04962e-25	8.757e-15	-0.897679	0.0687512	-0.0605	0.0078	SAME	0.111531	0.012033	TRUE	TRUE
EUR	autoGCC_q8	chr17:81562724:G:A	chr17:81562724:G:A	a	g	17:81562724	1.06855	0.0663	0.897679	1.015e-08	81413132	81772846	359.714	522	eQTL	chr17_81644300_G_A_b38	a	chr17_81644300_G_A_b38	ENSG00000182612.10	TSPAN10		Brain_Cerebellar_Hemisphere	1.04962e-25	4.689e-15	0.897679	0.0687512	-0.0612	0.0078	OPPOSITE	0.110508	0.0119226	TRUE	TRUE
EUR	autoGCC_q8	chr17:81562724:G:A	chr17:81562724:G:A	a	g	17:81562724	1.06855	0.0663	0.897679	1.015e-08	81413132	81772846	359.714	522	eQTL	chr17_81597904_C_G_b38	c	chr17_81597904_C_G_b38	ENSG00000182612.10	TSPAN10		Brain_Cerebellar_Hemisphere	1.04962e-25	9.678e-15	-0.897679	0.0687512	0.0604	0.0078	OPPOSITE	0.0946872	0.0102157	TRUE	TRUE
EUR	autoGCC_q8	chr17:81562724:G:A	chr17:81562724:G:A	a	g	17:81562724	1.06855	0.0663	0.486338	1.015e-08	81413132	81772846	359.714	522	eQTL	chr17_81644245_A_G_b38	a	chr17_81644245_A_G_b38	ENSG00000182612.10	TSPAN10		Brain_Cortex	2.54469e-09	2.92e-15	0.486338	0.077143	0.0616	0.0078	SAME	0.14805	0.0148009	TRUE	TRUE
EUR	autoGCC_q8	chr17:81562724:G:A	chr17:81562724:G:A	a	g	17:81562724	1.06855	0.0663	0.486338	1.015e-08	81413132	81772846	359.714	522	eQTL	chr17_81645371_A_G_b38	a	chr17_81645371_A_G_b38	ENSG00000182612.10	TSPAN10		Brain_Cortex	2.54469e-09	2.997e-15	0.486338	0.077143	0.0616	0.0078	SAME	0.14805	0.0148009	TRUE	TRUE
EUR	autoGCC_q8	chr17:81562724:G:A	chr17:81562724:G:A	a	g	17:81562724	1.06855	0.0663	0.498176	1.015e-08	81413132	81772846	359.714	522	eQTL	chr17_81611261_G_A_b38	a	chr17_81611261_G_A_b38	ENSG00000182612.10	TSPAN10		Brain_Cortex	9.66365e-10	6.037e-15	-0.498176	0.0767724	-0.0609	0.0078	SAME	0.14657	0.0146529	TRUE	TRUE
EUR	autoGCC_q8	chr17:81647906:TTAAC:T	chr17:81647906:T:TTAAC	t	ttaac	17:81647906	0.939789	-0.0621	0.899896	1.711e-15	81418853	81779444	360.591	522	eQTL	chr17_81647906_T_TTAAC_b38	t	chr17_81647906_T_TTAAC_b38	ENSG00000182612.10	TSPAN10		Brain_Cerebellum	1.07739e-26	1.711e-15	-0.899896	0.070239	-0.0621	0.0078	SAME	0.805989	0.999997	TRUE	TRUE
EUR	autoGCC_q8	chr17:81647906:TTAAC:T	chr17:81647906:T:TTAAC	t	ttaac	17:81647906	0.939789	-0.0621	0.907844	1.711e-15	81418853	81779444	360.591	522	eQTL	chr17_81648542_A_G_b38	a	chr17_81648542_A_G_b38	ENSG00000182612.10	TSPAN10		Brain_Cerebellum	5.94634e-27	8.005e-15	0.907844	0.0703601	0.0606	0.0078	SAME	0.194011	0.240711	TRUE	TRUE
EUR	autoGCC_q8	chr17:81647906:TTAAC:T	chr17:81647906:T:TTAAC	t	ttaac	17:81647906	0.939789	-0.0621	0.352481	1.711e-15	81418853	81779444	360.591	522	eQTL	chr17_81647906_T_TTAAC_b38	t	chr17_81647906_T_TTAAC_b38	ENSG00000182612.10	TSPAN10		Brain_Nucleus_accumbens_basal_ganglia	5.67818e-06	1.711e-15	-0.352481	0.0750955	-0.0621	0.0078	SAME	0.794316	0.508428	TRUE	TRUE
EUR	autoGCC_q8	chr17:81647906:TTAAC:T	chr17:81647906:T:TTAAC	t	ttaac	17:81647906	0.939789	-0.0621	0.345183	1.711e-15	81418853	81779444	360.591	522	eQTL	chr17_81648542_A_G_b38	a	chr17_81648542_A_G_b38	ENSG00000182612.10	TSPAN10		Brain_Nucleus_accumbens_basal_ganglia	1.03007e-05	8.005e-15	0.345183	0.0757988	0.0606	0.0078	SAME	0.11717	0.0749988	TRUE	TRUE
EUR	autoGCC_q8	chr17:81647906:TTAAC:T	chr17:81647906:T:TTAAC	t	ttaac	17:81647906	0.939789	-0.0621	0.33138	1.711e-15	81418853	81779444	360.591	522	eQTL	chr17_81644245_A_G_b38	a	chr17_81644245_A_G_b38	ENSG00000182612.10	TSPAN10		Brain_Nucleus_accumbens_basal_ganglia	2.20528e-05	2.92e-15	0.33138	0.0758178	0.0616	0.0078	SAME	0.0190017	0.0121626	TRUE	TRUE
EUR	autoGCC_q8	chr17:81647906:TTAAC:T	chr17:81647906:T:TTAAC	t	ttaac	17:81647906	0.939789	-0.0621	0.33138	1.711e-15	81418853	81779444	360.591	522	eQTL	chr17_81645371_A_G_b38	a	chr17_81645371_A_G_b38	ENSG00000182612.10	TSPAN10		Brain_Nucleus_accumbens_basal_ganglia	2.20528e-05	2.997e-15	0.33138	0.0758178	0.0616	0.0078	SAME	0.0190017	0.0121626	TRUE	TRUE
EUR	autoGCC_q8	chr17:81647906:TTAAC:T	chr17:81647906:T:TTAAC	t	ttaac	17:81647906	0.939789	-0.0621	0.897679	1.711e-15	81418853	81779444	360.591	522	eQTL	chr17_81644245_A_G_b38	a	chr17_81644245_A_G_b38	ENSG00000182612.10	TSPAN10		Brain_Cerebellar_Hemisphere	1.04962e-25	2.92e-15	0.897679	0.0687512	0.0616	0.0078	SAME	0.21407	0.0230958	TRUE	TRUE
EUR	autoGCC_q8	chr17:81647906:TTAAC:T	chr17:81647906:T:TTAAC	t	ttaac	17:81647906	0.939789	-0.0621	0.897679	1.711e-15	81418853	81779444	360.591	522	eQTL	chr17_81645371_A_G_b38	a	chr17_81645371_A_G_b38	ENSG00000182612.10	TSPAN10		Brain_Cerebellar_Hemisphere	1.04962e-25	2.997e-15	0.897679	0.0687512	0.0616	0.0078	SAME	0.21407	0.0230958	TRUE	TRUE
EUR	autoGCC_q8	chr17:81647906:TTAAC:T	chr17:81647906:T:TTAAC	t	ttaac	17:81647906	0.939789	-0.0621	0.897679	1.711e-15	81418853	81779444	360.591	522	eQTL	chr17_81597516_G_A_b38	a	chr17_81597516_G_A_b38	ENSG00000182612.10	TSPAN10		Brain_Cerebellar_Hemisphere	1.04962e-25	8.757e-15	-0.897679	0.0687512	-0.0605	0.0078	SAME	0.111531	0.012033	TRUE	TRUE
EUR	autoGCC_q8	chr17:81647906:TTAAC:T	chr17:81647906:T:TTAAC	t	ttaac	17:81647906	0.939789	-0.0621	0.897679	1.711e-15	81418853	81779444	360.591	522	eQTL	chr17_81644300_G_A_b38	a	chr17_81644300_G_A_b38	ENSG00000182612.10	TSPAN10		Brain_Cerebellar_Hemisphere	1.04962e-25	4.689e-15	0.897679	0.0687512	-0.0612	0.0078	OPPOSITE	0.110508	0.0119226	TRUE	TRUE
EUR	autoGCC_q8	chr17:81647906:TTAAC:T	chr17:81647906:T:TTAAC	t	ttaac	17:81647906	0.939789	-0.0621	0.897679	1.711e-15	81418853	81779444	360.591	522	eQTL	chr17_81597904_C_G_b38	c	chr17_81597904_C_G_b38	ENSG00000182612.10	TSPAN10		Brain_Cerebellar_Hemisphere	1.04962e-25	9.678e-15	-0.897679	0.0687512	0.0604	0.0078	OPPOSITE	0.0946872	0.0102157	TRUE	TRUE
EUR	autoGCC_q8	chr17:81647906:TTAAC:T	chr17:81647906:T:TTAAC	t	ttaac	17:81647906	0.939789	-0.0621	0.486338	1.711e-15	81418853	81779444	360.591	522	eQTL	chr17_81644245_A_G_b38	a	chr17_81644245_A_G_b38	ENSG00000182612.10	TSPAN10		Brain_Cortex	2.54469e-09	2.92e-15	0.486338	0.077143	0.0616	0.0078	SAME	0.14805	0.0148009	TRUE	TRUE
EUR	autoGCC_q8	chr17:81647906:TTAAC:T	chr17:81647906:T:TTAAC	t	ttaac	17:81647906	0.939789	-0.0621	0.486338	1.711e-15	81418853	81779444	360.591	522	eQTL	chr17_81645371_A_G_b38	a	chr17_81645371_A_G_b38	ENSG00000182612.10	TSPAN10		Brain_Cortex	2.54469e-09	2.997e-15	0.486338	0.077143	0.0616	0.0078	SAME	0.14805	0.0148009	TRUE	TRUE
EUR	autoGCC_q8	chr17:81647906:TTAAC:T	chr17:81647906:T:TTAAC	t	ttaac	17:81647906	0.939789	-0.0621	0.498176	1.711e-15	81418853	81779444	360.591	522	eQTL	chr17_81611261_G_A_b38	a	chr17_81611261_G_A_b38	ENSG00000182612.10	TSPAN10		Brain_Cortex	9.66365e-10	6.037e-15	-0.498176	0.0767724	-0.0609	0.0078	SAME	0.14657	0.0146529	TRUE	TRUE
EUR	autoGCC_q3	chr17:81562724:G:A	chr17:81562724:G:A	a	g	17:81562724	0.924872	-0.0781	0.899896	1.608e-11	81413132	81772846	359.714	563	eQTL	chr17_81647906_T_TTAAC_b38	t	chr17_81647906_T_TTAAC_b38	ENSG00000182612.10	TSPAN10		Brain_Cerebellum	1.07739e-26	8.44e-22	-0.899896	0.070239	0.075	0.0078	OPPOSITE	0.667581	0.99984	TRUE	TRUE
EUR	autoGCC_q3	chr17:81562724:G:A	chr17:81562724:G:A	a	g	17:81562724	0.924872	-0.0781	0.907844	1.608e-11	81413132	81772846	359.714	563	eQTL	chr17_81648542_A_G_b38	a	chr17_81648542_A_G_b38	ENSG00000182612.10	TSPAN10		Brain_Cerebellum	5.94634e-27	4.358e-21	0.907844	0.0703601	-0.0735	0.0078	OPPOSITE	0.332414	0.497859	TRUE	TRUE
EUR	autoGCC_q3	chr17:81562724:G:A	chr17:81562724:G:A	a	g	17:81562724	0.924872	-0.0781	0.352481	1.608e-11	81413132	81772846	359.714	563	eQTL	chr17_81647906_T_TTAAC_b38	t	chr17_81647906_T_TTAAC_b38	ENSG00000182612.10	TSPAN10		Brain_Nucleus_accumbens_basal_ganglia	5.67818e-06	8.44e-22	-0.352481	0.0750955	0.075	0.0078	OPPOSITE	0.717212	0.390303	TRUE	TRUE
EUR	autoGCC_q3	chr17:81562724:G:A	chr17:81562724:G:A	a	g	17:81562724	0.924872	-0.0781	0.345183	1.608e-11	81413132	81772846	359.714	563	eQTL	chr17_81648542_A_G_b38	a	chr17_81648542_A_G_b38	ENSG00000182612.10	TSPAN10		Brain_Nucleus_accumbens_basal_ganglia	1.03007e-05	4.358e-21	0.345183	0.0757988	-0.0735	0.0078	OPPOSITE	0.205361	0.111756	TRUE	TRUE
EUR	autoGCC_q3	chr17:81562724:G:A	chr17:81562724:G:A	a	g	17:81562724	0.924872	-0.0781	0.897679	1.608e-11	81413132	81772846	359.714	563	eQTL	chr17_81644245_A_G_b38	a	chr17_81644245_A_G_b38	ENSG00000182612.10	TSPAN10		Brain_Cerebellar_Hemisphere	1.04962e-25	5.587e-21	0.897679	0.0687512	-0.0735	0.0078	OPPOSITE	0.157459	0.0103733	TRUE	TRUE
EUR	autoGCC_q3	chr17:81562724:G:A	chr17:81562724:G:A	a	g	17:81562724	0.924872	-0.0781	0.473089	1.608e-11	81413132	81772846	359.714	563	eQTL	chr17_81647906_T_TTAAC_b38	t	chr17_81647906_T_TTAAC_b38	ENSG00000182612.10	TSPAN10		Brain_Cortex	7.27569e-09	8.44e-22	-0.473089	0.0775494	0.075	0.0078	OPPOSITE	0.110875	0.0107266	TRUE	TRUE
EUR	autoGCC_q3	chr17:81562724:G:A	chr17:81562724:G:A	a	g	17:81562724	0.924872	-0.0781	0.494634	1.608e-11	81413132	81772846	359.714	563	eQTL	chr17_81648542_A_G_b38	a	chr17_81648542_A_G_b38	ENSG00000182612.10	TSPAN10		Brain_Cortex	1.65811e-09	4.358e-21	0.494634	0.077451	-0.0735	0.0078	OPPOSITE	0.297248	0.0287573	TRUE	TRUE
EUR	autoGCC_q3	chr17:81646844:G:T	chr17:81646844:G:T	t	g	17:81646844	0.94535	-0.0562	0.473089	1.221e-10	81396844	81896844	500	568	eQTL	chr17_81647906_T_TTAAC_b38	t	chr17_81647906_T_TTAAC_b38	ENSG00000182612.10	TSPAN10		Brain_Cortex	7.27569e-09	8.44e-22	-0.473089	0.0775494	0.075	0.0078	OPPOSITE	0.110875	0.0107266	TRUE	TRUE
EUR	autoGCC_q3	chr17:81646844:G:T	chr17:81646844:G:T	t	g	17:81646844	0.94535	-0.0562	0.494634	1.221e-10	81396844	81896844	500	568	eQTL	chr17_81648542_A_G_b38	a	chr17_81648542_A_G_b38	ENSG00000182612.10	TSPAN10		Brain_Cortex	1.65811e-09	4.358e-21	0.494634	0.077451	-0.0735	0.0078	OPPOSITE	0.297248	0.0287573	TRUE	TRUE
EUR	autoGCC_q3	chr17:81647906:TTAAC:T	chr17:81647906:T:TTAAC	t	ttaac	17:81647906	1.07788	0.075	0.899896	8.44e-22	81418853	81779444	360.591	563	eQTL	chr17_81647906_T_TTAAC_b38	t	chr17_81647906_T_TTAAC_b38	ENSG00000182612.10	TSPAN10		Brain_Cerebellum	1.07739e-26	8.44e-22	-0.899896	0.070239	0.075	0.0078	OPPOSITE	0.667581	0.99984	TRUE	TRUE
EUR	autoGCC_q3	chr17:81647906:TTAAC:T	chr17:81647906:T:TTAAC	t	ttaac	17:81647906	1.07788	0.075	0.907844	8.44e-22	81418853	81779444	360.591	563	eQTL	chr17_81648542_A_G_b38	a	chr17_81648542_A_G_b38	ENSG00000182612.10	TSPAN10		Brain_Cerebellum	5.94634e-27	4.358e-21	0.907844	0.0703601	-0.0735	0.0078	OPPOSITE	0.332414	0.497859	TRUE	TRUE
EUR	autoGCC_q3	chr17:81647906:TTAAC:T	chr17:81647906:T:TTAAC	t	ttaac	17:81647906	1.07788	0.075	0.352481	8.44e-22	81418853	81779444	360.591	563	eQTL	chr17_81647906_T_TTAAC_b38	t	chr17_81647906_T_TTAAC_b38	ENSG00000182612.10	TSPAN10		Brain_Nucleus_accumbens_basal_ganglia	5.67818e-06	8.44e-22	-0.352481	0.0750955	0.075	0.0078	OPPOSITE	0.717212	0.390303	TRUE	TRUE
EUR	autoGCC_q3	chr17:81647906:TTAAC:T	chr17:81647906:T:TTAAC	t	ttaac	17:81647906	1.07788	0.075	0.345183	8.44e-22	81418853	81779444	360.591	563	eQTL	chr17_81648542_A_G_b38	a	chr17_81648542_A_G_b38	ENSG00000182612.10	TSPAN10		Brain_Nucleus_accumbens_basal_ganglia	1.03007e-05	4.358e-21	0.345183	0.0757988	-0.0735	0.0078	OPPOSITE	0.205361	0.111756	TRUE	TRUE
EUR	autoGCC_q3	chr17:81647906:TTAAC:T	chr17:81647906:T:TTAAC	t	ttaac	17:81647906	1.07788	0.075	0.897679	8.44e-22	81418853	81779444	360.591	563	eQTL	chr17_81644245_A_G_b38	a	chr17_81644245_A_G_b38	ENSG00000182612.10	TSPAN10		Brain_Cerebellar_Hemisphere	1.04962e-25	5.587e-21	0.897679	0.0687512	-0.0735	0.0078	OPPOSITE	0.157459	0.0103733	TRUE	TRUE
EUR	autoGCC_q3	chr17:81647906:TTAAC:T	chr17:81647906:T:TTAAC	t	ttaac	17:81647906	1.07788	0.075	0.473089	8.44e-22	81418853	81779444	360.591	563	eQTL	chr17_81647906_T_TTAAC_b38	t	chr17_81647906_T_TTAAC_b38	ENSG00000182612.10	TSPAN10		Brain_Cortex	7.27569e-09	8.44e-22	-0.473089	0.0775494	0.075	0.0078	OPPOSITE	0.110875	0.0107266	TRUE	TRUE
EUR	autoGCC_q3	chr17:81647906:TTAAC:T	chr17:81647906:T:TTAAC	t	ttaac	17:81647906	1.07788	0.075	0.494634	8.44e-22	81418853	81779444	360.591	563	eQTL	chr17_81648542_A_G_b38	a	chr17_81648542_A_G_b38	ENSG00000182612.10	TSPAN10		Brain_Cortex	1.65811e-09	4.358e-21	0.494634	0.077451	-0.0735	0.0078	OPPOSITE	0.297248	0.0287573	TRUE	TRUE
EUR	autoGCC_q2	chr14:59270382:G:A	chr14:59270382:G:A	a	g	14:59270382	0.943933	-0.0577	0.335065	1.436e-08	58935814	59617355	681.541	678	eQTL	chr14_59224912_A_G_b38	a	chr14_59224912_A_G_b38	ENSG00000100592.15	DAAM1		Brain_Cerebellum	2.14159e-07	0.0004923	-0.335065	0.061951	0.0262	0.0075	OPPOSITE	0.6109	0.0473786	TRUE	TRUE
EUR	autoGCC_q2	chr14:60509819:C:A	chr14:60509819:C:A	a	c	14:60509819	0.956093	-0.0449	0.131276	4.682e-09	60270263	61166622	896.359	900	eQTL	chr14_61153728_C_G_b38	c	chr14_61153728_C_G_b38	ENSG00000182107.6	TMEM30B		Cells_Cultured_fibroblasts	7.44134e-05	0.001921	-0.131276	0.0328017	-0.0232	0.0075	SAME	0.358391	0.0111525	TRUE	TRUE
EUR	autoGCC_q2	chr14:60509819:C:A	chr14:60509819:C:A	a	c	14:60509819	0.956093	-0.0449	0.143707	4.682e-09	60270263	61166622	896.359	795	eQTL	chr14_60419432_T_C_b38	t	chr14_60419432_T_C_b38	ENSG00000126773.12	PCNX4		Artery_Tibial	1.0488e-06	1.292e-08	0.143707	0.0290795	0.0443	0.0078	SAME	0.336341	0.0189189	TRUE	TRUE
EUR	autoGCC_q2	chr14:60509819:C:A	chr14:60509819:C:A	a	c	14:60509819	0.956093	-0.0449	0.145487	4.682e-09	60270263	61166622	896.359	795	eQTL	chr14_60509819_C_A_b38	a	chr14_60509819_C_A_b38	ENSG00000126773.12	PCNX4		Artery_Tibial	7.39096e-07	4.682e-09	-0.145487	0.0290225	-0.0449	0.0077	SAME	0.327403	0.0184162	TRUE	TRUE
EUR	mocoRNFL_q9	chr10:68263296:A:G	chr10:68263296:A:G	a	g	10:68263296	0.940071	-0.0618	0.381502	3.084e-13	68098183	68868604	770.421	964	eQTL	chr10_68261045_G_A_b38	a	chr10_68261045_G_A_b38	ENSG00000179774.8	ATOH7		Artery_Aorta	2.91814e-08	4.24e-13	0.381502	0.0670683	0.0615	0.0085	SAME	0.4878	0.0665321	TRUE	TRUE
EUR	mocoRNFL_q9	chr10:68263296:A:G	chr10:68263296:A:G	a	g	10:68263296	0.940071	-0.0618	0.386088	3.084e-13	68098183	68868604	770.421	964	eQTL	chr10_68261741_A_G_b38	a	chr10_68261741_A_G_b38	ENSG00000179774.8	ATOH7		Artery_Aorta	2.61114e-08	4.526e-13	-0.386088	0.0676261	-0.0614	0.0085	SAME	0.254194	0.0346701	TRUE	TRUE
EUR	mocoRNFL_q9	chr10:68263296:A:G	chr10:68263296:A:G	a	g	10:68263296	0.940071	-0.0618	0.378795	3.084e-13	68098183	68868604	770.421	964	eQTL	chr10_68262869_CTT_C_b38	ctt	chr10_68262869_CTT_C_b38	ENSG00000179774.8	ATOH7		Artery_Aorta	4.33309e-08	1.651e-12	0.378795	0.0674799	-0.0603	0.0085	OPPOSITE	0.111056	0.0151471	TRUE	TRUE
EUR	mocoRNFL_q9	chr10:68263296:A:G	chr10:68263296:A:G	a	g	10:68263296	0.940071	-0.0618	0.338581	3.084e-13	68098183	68868604	770.421	964	eQTL	chr10_68232096_A_G_b38	a	chr10_68232096_A_G_b38	ENSG00000179774.8	ATOH7		Brain_Cerebellar_Hemisphere	3.99968e-06	4.562e-11	0.338581	0.0704117	-0.0569	0.0086	OPPOSITE	0.269986	0.0135687	TRUE	TRUE
EUR	mocoRNFL_q9	chr10:68263296:A:G	chr10:68263296:A:G	a	g	10:68263296	0.940071	-0.0618	0.337305	3.084e-13	68098183	68868604	770.421	964	eQTL	chr10_68261045_G_A_b38	a	chr10_68261045_G_A_b38	ENSG00000233590.1	RP11-153K11.3		Artery_Tibial	2.18951e-12	4.24e-13	0.337305	0.0468655	0.0615	0.0085	SAME	0.546968	0.0434614	TRUE	TRUE
EUR	autoGCC_q0	chr17:81562261:G:A	chr17:81562261:G:A	a	g	17:81562261	0.935289	-0.0669	0.899896	5.681e-09	81413132	81772846	359.714	625	eQTL	chr17_81647906_T_TTAAC_b38	t	chr17_81647906_T_TTAAC_b38	ENSG00000182612.10	TSPAN10		Brain_Cerebellum	1.07739e-26	1.414e-21	-0.899896	0.070239	0.0737	0.0077	OPPOSITE	0.669242	0.99984	TRUE	TRUE
EUR	autoGCC_q0	chr17:81562261:G:A	chr17:81562261:G:A	a	g	17:81562261	0.935289	-0.0669	0.907844	5.681e-09	81413132	81772846	359.714	625	eQTL	chr17_81648542_A_G_b38	a	chr17_81648542_A_G_b38	ENSG00000182612.10	TSPAN10		Brain_Cerebellum	5.94634e-27	5.993e-21	0.907844	0.0703601	-0.0725	0.0077	OPPOSITE	0.330753	0.494142	TRUE	TRUE
EUR	autoGCC_q0	chr17:81562261:G:A	chr17:81562261:G:A	a	g	17:81562261	0.935289	-0.0669	0.352481	5.681e-09	81413132	81772846	359.714	625	eQTL	chr17_81647906_T_TTAAC_b38	t	chr17_81647906_T_TTAAC_b38	ENSG00000182612.10	TSPAN10		Brain_Nucleus_accumbens_basal_ganglia	5.67818e-06	1.414e-21	-0.352481	0.0750955	0.0737	0.0077	OPPOSITE	0.719109	0.3903	TRUE	TRUE
EUR	autoGCC_q0	chr17:81562261:G:A	chr17:81562261:G:A	a	g	17:81562261	0.935289	-0.0669	0.345183	5.681e-09	81413132	81772846	359.714	625	eQTL	chr17_81648542_A_G_b38	a	chr17_81648542_A_G_b38	ENSG00000182612.10	TSPAN10		Brain_Nucleus_accumbens_basal_ganglia	1.03007e-05	5.993e-21	0.345183	0.0757988	-0.0725	0.0077	OPPOSITE	0.204367	0.110921	TRUE	TRUE
EUR	autoGCC_q0	chr17:81562261:G:A	chr17:81562261:G:A	a	g	17:81562261	0.935289	-0.0669	0.473089	5.681e-09	81413132	81772846	359.714	625	eQTL	chr17_81647906_T_TTAAC_b38	t	chr17_81647906_T_TTAAC_b38	ENSG00000182612.10	TSPAN10		Brain_Cortex	7.27569e-09	1.414e-21	-0.473089	0.0775494	0.0737	0.0077	OPPOSITE	0.104722	0.0107266	TRUE	TRUE
EUR	autoGCC_q0	chr17:81562261:G:A	chr17:81562261:G:A	a	g	17:81562261	0.935289	-0.0669	0.494634	5.681e-09	81413132	81772846	359.714	625	eQTL	chr17_81648542_A_G_b38	a	chr17_81648542_A_G_b38	ENSG00000182612.10	TSPAN10		Brain_Cortex	1.65811e-09	5.993e-21	0.494634	0.077451	-0.0725	0.0077	OPPOSITE	0.278655	0.0285425	TRUE	TRUE
EUR	autoGCC_q0	chr17:81562261:G:A	chr17:81562261:G:A	a	g	17:81562261	0.935289	-0.0669	0.498176	5.681e-09	81413132	81772846	359.714	625	eQTL	chr17_81611261_G_A_b38	a	chr17_81611261_G_A_b38	ENSG00000182612.10	TSPAN10		Brain_Cortex	9.66365e-10	6.951e-21	-0.498176	0.0767724	0.0724	0.0077	OPPOSITE	0.159213	0.0163082	TRUE	TRUE
EUR	autoGCC_q0	chr17:81647906:TTAAC:T	chr17:81647906:T:TTAAC	t	ttaac	17:81647906	1.07648	0.0737	0.899896	1.414e-21	81418853	81779444	360.591	624	eQTL	chr17_81647906_T_TTAAC_b38	t	chr17_81647906_T_TTAAC_b38	ENSG00000182612.10	TSPAN10		Brain_Cerebellum	1.07739e-26	1.414e-21	-0.899896	0.070239	0.0737	0.0077	OPPOSITE	0.669242	0.99984	TRUE	TRUE
EUR	autoGCC_q0	chr17:81647906:TTAAC:T	chr17:81647906:T:TTAAC	t	ttaac	17:81647906	1.07648	0.0737	0.907844	1.414e-21	81418853	81779444	360.591	624	eQTL	chr17_81648542_A_G_b38	a	chr17_81648542_A_G_b38	ENSG00000182612.10	TSPAN10		Brain_Cerebellum	5.94634e-27	5.993e-21	0.907844	0.0703601	-0.0725	0.0077	OPPOSITE	0.330753	0.494142	TRUE	TRUE
EUR	autoGCC_q0	chr17:81647906:TTAAC:T	chr17:81647906:T:TTAAC	t	ttaac	17:81647906	1.07648	0.0737	0.352481	1.414e-21	81418853	81779444	360.591	624	eQTL	chr17_81647906_T_TTAAC_b38	t	chr17_81647906_T_TTAAC_b38	ENSG00000182612.10	TSPAN10		Brain_Nucleus_accumbens_basal_ganglia	5.67818e-06	1.414e-21	-0.352481	0.0750955	0.0737	0.0077	OPPOSITE	0.719109	0.3903	TRUE	TRUE
EUR	autoGCC_q0	chr17:81647906:TTAAC:T	chr17:81647906:T:TTAAC	t	ttaac	17:81647906	1.07648	0.0737	0.345183	1.414e-21	81418853	81779444	360.591	624	eQTL	chr17_81648542_A_G_b38	a	chr17_81648542_A_G_b38	ENSG00000182612.10	TSPAN10		Brain_Nucleus_accumbens_basal_ganglia	1.03007e-05	5.993e-21	0.345183	0.0757988	-0.0725	0.0077	OPPOSITE	0.204367	0.110921	TRUE	TRUE
EUR	autoGCC_q0	chr17:81647906:TTAAC:T	chr17:81647906:T:TTAAC	t	ttaac	17:81647906	1.07648	0.0737	0.473089	1.414e-21	81418853	81779444	360.591	624	eQTL	chr17_81647906_T_TTAAC_b38	t	chr17_81647906_T_TTAAC_b38	ENSG00000182612.10	TSPAN10		Brain_Cortex	7.27569e-09	1.414e-21	-0.473089	0.0775494	0.0737	0.0077	OPPOSITE	0.104722	0.0107266	TRUE	TRUE
EUR	autoGCC_q0	chr17:81647906:TTAAC:T	chr17:81647906:T:TTAAC	t	ttaac	17:81647906	1.07648	0.0737	0.494634	1.414e-21	81418853	81779444	360.591	624	eQTL	chr17_81648542_A_G_b38	a	chr17_81648542_A_G_b38	ENSG00000182612.10	TSPAN10		Brain_Cortex	1.65811e-09	5.993e-21	0.494634	0.077451	-0.0725	0.0077	OPPOSITE	0.278655	0.0285425	TRUE	TRUE
EUR	autoGCC_q0	chr17:81647906:TTAAC:T	chr17:81647906:T:TTAAC	t	ttaac	17:81647906	1.07648	0.0737	0.498176	1.414e-21	81418853	81779444	360.591	624	eQTL	chr17_81611261_G_A_b38	a	chr17_81611261_G_A_b38	ENSG00000182612.10	TSPAN10		Brain_Cortex	9.66365e-10	6.951e-21	-0.498176	0.0767724	0.0724	0.0077	OPPOSITE	0.159213	0.0163082	TRUE	TRUE
EUR	autoGCC_q4	chr15:27985172:C:T	chr15:27985172:C:T	t	c	15:27985172	0.928207	-0.0745	0.621763	2.52e-08	27684286	28789849	1105.56	113	eQTL	chr15_28744721_C_G_b38	c	chr15_28744721_C_G_b38	ENSG00000206149.10	HERC2P9		Brain_Putamen_basal_ganglia	2.23137e-06	0.01615	-0.621763	0.125542	0.066	0.0274	OPPOSITE	0.566409	0.0172445	TRUE	TRUE
EUR	autoGCC_q4	chr15:27985172:C:T	chr15:27985172:C:T	t	c	15:27985172	0.928207	-0.0745	0.663996	2.52e-08	27684286	28789849	1105.56	114	eQTL	chr15_28713579_A_G_b38	a	chr15_28713579_A_G_b38	ENSG00000206149.10	HERC2P9		Cells_Cultured_fibroblasts	7.63931e-15	0.01013	-0.663996	0.0822612	0.0668	0.026	OPPOSITE	0.843653	0.0345376	TRUE	TRUE
EUR	autoGCC_q4	chr15:27985172:C:T	chr15:27985172:C:T	t	c	15:27985172	0.928207	-0.0745	0.706756	2.52e-08	27684286	28789849	1105.56	114	eQTL	chr15_28713579_A_G_b38	a	chr15_28713579_A_G_b38	ENSG00000206149.10	HERC2P9		Nerve_Tibial	4.00209e-19	0.01013	-0.706756	0.0756467	0.0668	0.026	OPPOSITE	0.889784	0.0349208	TRUE	TRUE
EUR	autoGCC_q4	chr15:27985172:C:T	chr15:27985172:C:T	t	c	15:27985172	0.928207	-0.0745	0.438715	2.52e-08	27684286	28789849	1105.56	114	eQTL	chr15_28713579_A_G_b38	a	chr15_28713579_A_G_b38	ENSG00000254398.1	RP11-578F21.2		Nerve_Tibial	2.8645e-06	0.01013	-0.438715	0.0925765	0.0668	0.026	OPPOSITE	0.799796	0.0283923	TRUE	TRUE
EUR	autoGCC_q4	chr15:27985172:C:T	chr15:27985172:C:T	t	c	15:27985172	0.928207	-0.0745	0.628661	2.52e-08	27684286	28789849	1105.56	114	eQTL	chr15_28713579_A_G_b38	a	chr15_28713579_A_G_b38	ENSG00000206149.10	HERC2P9		Artery_Tibial	1.42654e-17	0.01013	-0.628661	0.0710447	0.0668	0.026	OPPOSITE	0.719835	0.0354135	TRUE	TRUE
EUR	autoGCC_q4	chr15:27985172:C:T	chr15:27985172:C:T	t	c	15:27985172	0.928207	-0.0745	0.250805	2.52e-08	27684286	28789849	1105.56	114	eQTL	chr15_28289072_A_G_b38	a	chr15_28289072_A_G_b38	ENSG00000206149.10	HERC2P9		Artery_Tibial	2.93632e-05	0.000709	0.250805	0.0594865	0.0462	0.0136	SAME	0.279904	0.0137704	TRUE	TRUE
EUR	autoGCC_q4	chr15:27985172:C:T	chr15:27985172:C:T	t	c	15:27985172	0.928207	-0.0745	1.23468	2.52e-08	27684286	28789849	1105.56	95	sQTL	chr15_28713579_A_G_b38	a	chr15_28713579_A_G_b38	ENSG00000248334.6	WHAMMP2	chr15:28746149:28747710:clu_16251:ENSG00000248334.6	Artery_Coronary	1.08384e-06	0.01013	-1.23468	0.244922	0.0668	0.026	OPPOSITE	0.686585	0.0319087	FALSE	TRUE
EUR	autoGCC_q4	chr15:27985172:C:T	chr15:27985172:C:T	t	c	15:27985172	0.928207	-0.0745	1.215	2.52e-08	27684286	28789849	1105.56	95	sQTL	chr15_28744721_C_G_b38	c	chr15_28744721_C_G_b38	ENSG00000248334.6	WHAMMP2	chr15:28746149:28747710:clu_17325:ENSG00000248334.6	Artery_Aorta	1.57777e-14	0.01615	-1.215	0.15167	0.066	0.0274	OPPOSITE	0.594108	0.0272036	FALSE	TRUE
EUR	autoGCC_q4	chr15:27985172:C:T	chr15:27985172:C:T	t	c	15:27985172	0.928207	-0.0745	0.962296	2.52e-08	27684286	28789849	1105.56	95	sQTL	chr15_28744721_C_G_b38	c	chr15_28744721_C_G_b38	ENSG00000248334.6	WHAMMP2	chr15:28746149:28747710:clu_18001:ENSG00000248334.6	Artery_Tibial	3.2492e-14	0.01615	-0.962296	0.12351	0.066	0.0274	OPPOSITE	0.924072	0.0318199	FALSE	TRUE
EUR	autoGCC_q4	chr15:27985172:C:T	chr15:27985172:C:T	t	c	15:27985172	0.928207	-0.0745	0.856381	2.52e-08	27684286	28789849	1105.56	95	sQTL	chr15_28713579_A_G_b38	a	chr15_28713579_A_G_b38	ENSG00000248334.6	WHAMMP2	chr15:28746149:28747710:clu_15565:ENSG00000248334.6	Cells_Cultured_fibroblasts	1.62022e-09	0.01013	-0.856381	0.139086	0.0668	0.026	OPPOSITE	0.405492	0.0142933	FALSE	TRUE
EUR	autoGCC_q4	chr17:81644245:A:G	chr17:81644245:A:G	a	g	17:81644245	1.05232	0.051	0.899896	4.123e-11	81418853	81779444	360.591	466	eQTL	chr17_81647906_T_TTAAC_b38	t	chr17_81647906_T_TTAAC_b38	ENSG00000182612.10	TSPAN10		Brain_Cerebellum	1.07739e-26	5.666e-11	-0.899896	0.070239	-0.0506	0.0077	SAME	0.896887	0.999999	TRUE	TRUE
EUR	autoGCC_q4	chr17:81644245:A:G	chr17:81644245:A:G	a	g	17:81644245	1.05232	0.051	0.907844	4.123e-11	81418853	81779444	360.591	466	eQTL	chr17_81648542_A_G_b38	a	chr17_81648542_A_G_b38	ENSG00000182612.10	TSPAN10		Brain_Cerebellum	5.94634e-27	1.53e-10	0.907844	0.0703601	0.0494	0.0077	SAME	0.103113	0.114968	TRUE	TRUE
EUR	autoGCC_q4	chr17:81644245:A:G	chr17:81644245:A:G	a	g	17:81644245	1.05232	0.051	0.33138	4.123e-11	81418853	81779444	360.591	466	eQTL	chr17_81644245_A_G_b38	a	chr17_81644245_A_G_b38	ENSG00000182612.10	TSPAN10		Brain_Nucleus_accumbens_basal_ganglia	2.20528e-05	4.123e-11	0.33138	0.0758178	0.051	0.0077	SAME	0.0271274	0.0177585	TRUE	TRUE
EUR	autoGCC_q4	chr17:81644245:A:G	chr17:81644245:A:G	a	g	17:81644245	1.05232	0.051	0.33138	4.123e-11	81418853	81779444	360.591	466	eQTL	chr17_81645371_A_G_b38	a	chr17_81645371_A_G_b38	ENSG00000182612.10	TSPAN10		Brain_Nucleus_accumbens_basal_ganglia	2.20528e-05	4.509e-11	0.33138	0.0758178	0.0509	0.0077	SAME	0.0233598	0.0152921	TRUE	TRUE
EUR	autoGCC_q4	chr17:81644245:A:G	chr17:81644245:A:G	a	g	17:81644245	1.05232	0.051	0.352481	4.123e-11	81418853	81779444	360.591	466	eQTL	chr17_81647906_T_TTAAC_b38	t	chr17_81647906_T_TTAAC_b38	ENSG00000182612.10	TSPAN10		Brain_Nucleus_accumbens_basal_ganglia	5.67818e-06	5.666e-11	-0.352481	0.0750955	-0.0506	0.0077	SAME	0.842905	0.551794	TRUE	TRUE
EUR	autoGCC_q4	chr17:81644245:A:G	chr17:81644245:A:G	a	g	17:81644245	1.05232	0.051	0.345183	4.123e-11	81418853	81779444	360.591	466	eQTL	chr17_81648542_A_G_b38	a	chr17_81648542_A_G_b38	ENSG00000182612.10	TSPAN10		Brain_Nucleus_accumbens_basal_ganglia	1.03007e-05	1.53e-10	0.345183	0.0757988	0.0494	0.0077	SAME	0.061824	0.0404721	TRUE	TRUE
EUR	autoGCC_q4	chr17:81644245:A:G	chr17:81644245:A:G	a	g	17:81644245	1.05232	0.051	0.897679	4.123e-11	81418853	81779444	360.591	466	eQTL	chr17_81644245_A_G_b38	a	chr17_81644245_A_G_b38	ENSG00000182612.10	TSPAN10		Brain_Cerebellar_Hemisphere	1.04962e-25	4.123e-11	0.897679	0.0687512	0.051	0.0077	SAME	0.274064	0.0362593	TRUE	TRUE
EUR	autoGCC_q4	chr17:81644245:A:G	chr17:81644245:A:G	a	g	17:81644245	1.05232	0.051	0.897679	4.123e-11	81418853	81779444	360.591	466	eQTL	chr17_81645371_A_G_b38	a	chr17_81645371_A_G_b38	ENSG00000182612.10	TSPAN10		Brain_Cerebellar_Hemisphere	1.04962e-25	4.509e-11	0.897679	0.0687512	0.0509	0.0077	SAME	0.236001	0.0312234	TRUE	TRUE
EUR	autoGCC_q4	chr17:81644245:A:G	chr17:81644245:A:G	a	g	17:81644245	1.05232	0.051	0.897679	4.123e-11	81418853	81779444	360.591	466	eQTL	chr17_81597516_G_A_b38	a	chr17_81597516_G_A_b38	ENSG00000182612.10	TSPAN10		Brain_Cerebellar_Hemisphere	1.04962e-25	1.256e-10	-0.897679	0.0687512	-0.0497	0.0077	SAME	0.128219	0.0169637	TRUE	TRUE
EUR	autoGCC_q4	chr17:81644245:A:G	chr17:81644245:A:G	a	g	17:81644245	1.05232	0.051	0.897679	4.123e-11	81418853	81779444	360.591	466	eQTL	chr17_81597904_C_G_b38	c	chr17_81597904_C_G_b38	ENSG00000182612.10	TSPAN10		Brain_Cerebellar_Hemisphere	1.04962e-25	1.356e-10	-0.897679	0.0687512	0.0496	0.0077	OPPOSITE	0.11067	0.0146419	TRUE	TRUE
EUR	autoGCC_q4	chr17:81644245:A:G	chr17:81644245:A:G	a	g	17:81644245	1.05232	0.051	0.486338	4.123e-11	81418853	81779444	360.591	466	eQTL	chr17_81644245_A_G_b38	a	chr17_81644245_A_G_b38	ENSG00000182612.10	TSPAN10		Brain_Cortex	2.54469e-09	4.123e-11	0.486338	0.077143	0.051	0.0077	SAME	0.213813	0.0228728	TRUE	TRUE
EUR	autoGCC_q4	chr17:81644245:A:G	chr17:81644245:A:G	a	g	17:81644245	1.05232	0.051	0.486338	4.123e-11	81418853	81779444	360.591	466	eQTL	chr17_81645371_A_G_b38	a	chr17_81645371_A_G_b38	ENSG00000182612.10	TSPAN10		Brain_Cortex	2.54469e-09	4.509e-11	0.486338	0.077143	0.0509	0.0077	SAME	0.184117	0.0196961	TRUE	TRUE
EUR	autoGCC_q4	chr17:81644245:A:G	chr17:81644245:A:G	a	g	17:81644245	1.05232	0.051	0.498176	4.123e-11	81418853	81779444	360.591	466	eQTL	chr17_81611261_G_A_b38	a	chr17_81611261_G_A_b38	ENSG00000182612.10	TSPAN10		Brain_Cortex	9.66365e-10	1.172e-10	-0.498176	0.0767724	-0.0498	0.0077	SAME	0.138419	0.0148074	TRUE	TRUE
EUR	autoGCC_q4	chr17:81644245:A:G	chr17:81644245:A:G	a	g	17:81644245	1.05232	0.051	0.492044	4.123e-11	81418853	81779444	360.591	466	eQTL	chr17_81639794_T_C_b38	t	chr17_81639794_T_C_b38	ENSG00000182612.10	TSPAN10		Brain_Cortex	1.34602e-09	9.561e-11	0.492044	0.0765691	0.05	0.0077	SAME	0.0952597	0.0101905	TRUE	TRUE
Cross-ancestry	autoRNFL_q4	chr10:68261045:G:A	chr10:68261100:C:G	a	g	10:68261100	1.04896	0.0478	0.507797	1.894e-09	67736409	68416974	680.565	626	eQTL	chr10_68281826_C_T_b38	t	chr10_68281826_C_T_b38	ENSG00000108187.15	PBLD		Brain_Putamen_basal_ganglia	7.36559e-18	3.27e-09	-0.507797	0.0506823	0.0483	0.0082	OPPOSITE	0.402525	0.039929	TRUE	TRUE
Cross-ancestry	autoRNFL_q4	chr10:68261045:G:A	chr10:68261100:C:G	a	g	10:68261100	1.04896	0.0478	0.507797	1.894e-09	67736409	68416974	680.565	626	eQTL	chr10_68280354_A_G_b38	a	chr10_68280354_A_G_b38	ENSG00000108187.15	PBLD		Brain_Putamen_basal_ganglia	7.36559e-18	3.815e-09	-0.507797	0.0506823	-0.0481	0.0082	SAME	0.358792	0.0355908	TRUE	TRUE
Cross-ancestry	autoRNFL_q4	chr10:68261045:G:A	chr10:68261100:C:G	a	g	10:68261100	1.04896	0.0478	0.509245	1.894e-09	67736409	68416974	680.565	626	eQTL	chr10_68284945_A_G_b38	a	chr10_68284945_A_G_b38	ENSG00000108187.15	PBLD		Brain_Putamen_basal_ganglia	4.26406e-18	6.111e-09	-0.509245	0.0503459	-0.0474	0.0081	SAME	0.20646	0.0204801	TRUE	TRUE
Cross-ancestry	autoRNFL_q4	chr10:68261045:G:A	chr10:68261100:C:G	a	g	10:68261100	1.04896	0.0478	0.381502	1.894e-09	67736409	68416974	680.565	626	eQTL	chr10_68261045_G_A_b38	a	chr10_68261045_G_A_b38	ENSG00000179774.8	ATOH7		Artery_Aorta	2.91814e-08	1.894e-09	0.381502	0.0670683	0.0478	0.008	SAME	0.778082	0.0771567	TRUE	TRUE
Cross-ancestry	autoRNFL_q4	chr10:68261045:G:A	chr10:68261100:C:G	a	g	10:68261100	1.04896	0.0478	0.378795	1.894e-09	67736409	68416974	680.565	626	eQTL	chr10_68262869_CTT_C_b38	ctt	chr10_68262869_CTT_C_b38	ENSG00000179774.8	ATOH7		Artery_Aorta	4.33309e-08	4.578e-09	0.378795	0.0674799	-0.0469	0.008	OPPOSITE	0.169777	0.0168355	TRUE	TRUE
Cross-ancestry	autoRNFL_q4	chr10:68261045:G:A	chr10:68261100:C:G	a	g	10:68261100	1.04896	0.0478	0.459313	1.894e-09	67736409	68416974	680.565	624	eQTL	chr10_68284945_A_G_b38	a	chr10_68284945_A_G_b38	ENSG00000108187.15	PBLD		Brain_Amygdala	1.8199e-09	6.111e-09	-0.459313	0.0696577	-0.0474	0.0081	SAME	0.713711	0.0102188	TRUE	TRUE
Cross-ancestry	autoRNFL_q4	chr10:68261045:G:A	chr10:68261100:C:G	a	g	10:68261100	1.04896	0.0478	0.380852	1.894e-09	67736409	68416974	680.565	626	eQTL	chr10_68281826_C_T_b38	t	chr10_68281826_C_T_b38	ENSG00000108187.15	PBLD		Brain_Cerebellar_Hemisphere	4.50896e-07	3.27e-09	-0.380852	0.0718009	0.0483	0.0082	OPPOSITE	0.361103	0.0307176	TRUE	TRUE
Cross-ancestry	autoRNFL_q4	chr10:68261045:G:A	chr10:68261100:C:G	a	g	10:68261100	1.04896	0.0478	0.380852	1.894e-09	67736409	68416974	680.565	626	eQTL	chr10_68280354_A_G_b38	a	chr10_68280354_A_G_b38	ENSG00000108187.15	PBLD		Brain_Cerebellar_Hemisphere	4.50896e-07	3.815e-09	-0.380852	0.0718009	-0.0481	0.0082	SAME	0.32187	0.0273802	TRUE	TRUE
Cross-ancestry	autoRNFL_q4	chr10:68261045:G:A	chr10:68261100:C:G	a	g	10:68261100	1.04896	0.0478	0.386207	1.894e-09	67736409	68416974	680.565	626	eQTL	chr10_68284945_A_G_b38	a	chr10_68284945_A_G_b38	ENSG00000108187.15	PBLD		Brain_Cerebellar_Hemisphere	3.47526e-07	6.111e-09	-0.386207	0.072033	-0.0474	0.0081	SAME	0.287668	0.0244708	TRUE	TRUE
Cross-ancestry	autoRNFL_q4	chr10:68261045:G:A	chr10:68261100:C:G	a	g	10:68261100	1.04896	0.0478	0.338581	1.894e-09	67736409	68416974	680.565	626	eQTL	chr10_68232096_A_G_b38	a	chr10_68232096_A_G_b38	ENSG00000179774.8	ATOH7		Brain_Cerebellar_Hemisphere	3.99968e-06	7.534e-08	0.338581	0.0704117	-0.044	0.0082	OPPOSITE	0.297167	0.0130903	TRUE	TRUE
Cross-ancestry	autoRNFL_q4	chr10:68261045:G:A	chr10:68261100:C:G	a	g	10:68261100	1.04896	0.0478	0.423767	1.894e-09	67736409	68416974	680.565	626	eQTL	chr10_68281826_C_T_b38	t	chr10_68281826_C_T_b38	ENSG00000179774.8	ATOH7		Artery_Tibial	2.28763e-20	3.27e-09	0.423767	0.0439074	0.0483	0.0082	SAME	0.487965	0.049774	TRUE	TRUE
Cross-ancestry	autoRNFL_q4	chr10:68261045:G:A	chr10:68261100:C:G	a	g	10:68261100	1.04896	0.0478	0.334823	1.894e-09	67736409	68416974	680.565	626	eQTL	chr10_68281826_C_T_b38	t	chr10_68281826_C_T_b38	ENSG00000233590.1	RP11-153K11.3		Artery_Tibial	6.05149e-12	3.27e-09	0.334823	0.0475374	0.0483	0.0082	SAME	0.134799	0.0139312	TRUE	TRUE
Cross-ancestry	autoRNFL_q4	chr10:68261045:G:A	chr10:68261100:C:G	a	g	10:68261100	1.04896	0.0478	0.423767	1.894e-09	67736409	68416974	680.565	626	eQTL	chr10_68280354_A_G_b38	a	chr10_68280354_A_G_b38	ENSG00000179774.8	ATOH7		Artery_Tibial	2.28763e-20	3.815e-09	0.423767	0.0439074	-0.0481	0.0082	OPPOSITE	0.434949	0.0443662	TRUE	TRUE
Cross-ancestry	autoRNFL_q4	chr10:68261045:G:A	chr10:68261100:C:G	a	g	10:68261100	1.04896	0.0478	0.334823	1.894e-09	67736409	68416974	680.565	626	eQTL	chr10_68280354_A_G_b38	a	chr10_68280354_A_G_b38	ENSG00000233590.1	RP11-153K11.3		Artery_Tibial	6.05149e-12	3.815e-09	0.334823	0.0475374	-0.0481	0.0082	OPPOSITE	0.120154	0.0124176	TRUE	TRUE
Cross-ancestry	autoRNFL_q4	chr10:68261045:G:A	chr10:68261100:C:G	a	g	10:68261100	1.04896	0.0478	0.340009	1.894e-09	67736409	68416974	680.565	626	eQTL	chr10_68284945_A_G_b38	a	chr10_68284945_A_G_b38	ENSG00000233590.1	RP11-153K11.3		Artery_Tibial	3.14715e-12	6.111e-09	0.340009	0.0476025	-0.0474	0.0081	OPPOSITE	0.138418	0.0143051	TRUE	TRUE
Cross-ancestry	autoRNFL_q4	chr10:68261045:G:A	chr10:68261100:C:G	a	g	10:68261100	1.04896	0.0478	0.337305	1.894e-09	67736409	68416974	680.565	626	eQTL	chr10_68261045_G_A_b38	a	chr10_68261045_G_A_b38	ENSG00000233590.1	RP11-153K11.3		Artery_Tibial	2.18951e-12	1.894e-09	0.337305	0.0468655	0.0478	0.008	SAME	0.560137	0.0578887	TRUE	TRUE
Cross-ancestry	autoRNFL_q4	chr14:74070028:C:T	chr14:74126422:A:G	t	c	14:74126422	0.937067	-0.065	0.166699	2.105e-09	73700162	74706180	1006.02	690	eQTL	chr14_74220714_C_T_b38	t	chr14_74220714_C_T_b38	ENSG00000156050.8	FAM161B		Cells_Cultured_fibroblasts	4.95168e-11	4.424e-06	-0.166699	0.0246878	0.0336	0.0073	OPPOSITE	0.695028	0.0195525	TRUE	TRUE
Cross-ancestry	autoRNFL_q4	chr14:74070028:C:T	chr14:74126422:A:G	t	c	14:74126422	0.937067	-0.065	0.178232	2.105e-09	73700162	74706180	1006.02	690	eQTL	chr14_73999038_A_T_b38	a	chr14_73999038_A_T_b38	ENSG00000187097.12	ENTPD5		Brain_Cortex	3.51192e-06	0.01462	0.178232	0.0371207	-0.0174	0.0071	OPPOSITE	0.761155	0.0119387	TRUE	TRUE
Cross-ancestry	autoRNFL_q4	chr14:74070028:C:T	chr14:74126422:A:G	t	c	14:74126422	0.937067	-0.065	0.358054	2.105e-09	73700162	74706180	1006.02	690	sQTL	chr14_74218780_C_T_b38	t	chr14_74218780_C_T_b38	ENSG00000119723.16	COQ6	chr14:73958245:73958971:clu_23566:ENSG00000119723.16	Nerve_Tibial	4.40347e-09	0.002628	0.358054	0.0599517	0.0219	0.0073	SAME	0.621455	0.0231192	FALSE	TRUE
Cross-ancestry	autoRNFL_q4	chr14:74070028:C:T	chr14:74126422:A:G	t	c	14:74126422	0.937067	-0.065	0.362808	2.105e-09	73700162	74706180	1006.02	690	sQTL	chr14_74215670_C_T_b38	t	chr14_74215670_C_T_b38	ENSG00000119723.16	COQ6	chr14:73958245:73958971:clu_23566:ENSG00000119723.16	Nerve_Tibial	2.23556e-09	0.002219	0.362808	0.0595766	0.0222	0.0072	SAME	0.319501	0.011886	FALSE	TRUE
Cross-ancestry	autoRNFL_q4	chr14:74070028:C:T	chr14:74126422:A:G	t	c	14:74126422	0.937067	-0.065	0.563873	2.105e-09	73700162	74706180	1006.02	690	sQTL	chr14_73999038_A_T_b38	a	chr14_73999038_A_T_b38	ENSG00000119725.18	ZNF410	chr14:73922206:73922493:clu_19489:ENSG00000119725.18	Brain_Cerebellum	2.48608e-08	0.01462	-0.563873	0.0967766	-0.0174	0.0071	SAME	0.935372	0.0101443	FALSE	TRUE
Cross-ancestry	autoRNFL_q4	chr14:74070028:C:T	chr14:74126422:A:G	t	c	14:74126422	0.937067	-0.065	0.562555	2.105e-09	73700162	74706180	1006.02	690	sQTL	chr14_73999038_A_T_b38	a	chr14_73999038_A_T_b38	ENSG00000119723.16	COQ6	chr14:73961570:73961737:clu_15994:ENSG00000119723.16	Brain_Hippocampus	3.04728e-08	0.01462	-0.562555	0.0958703	-0.0174	0.0071	SAME	0.887649	0.0126011	FALSE	TRUE
Cross-ancestry	autoGCC_q10	chr14:59270382:G:A	chr14:59336116:C:T	a	g	14:59336116	0.949519	-0.0518	0.639665	2.91e-08	59164061	59497831	333.77	404	eQTL	chr14_59480790_A_C_b38	a	chr14_59480790_A_C_b38	ENSG00000126790.11	L3HYPDH		Brain_Caudate_basal_ganglia	3.86796e-23	0.0007584	-0.639665	0.0544787	-0.0239	0.0071	SAME	0.507504	0.155515	TRUE	TRUE
Cross-ancestry	autoGCC_q10	chr14:59270382:G:A	chr14:59336116:C:T	a	g	14:59336116	0.949519	-0.0518	0.639665	2.91e-08	59164061	59497831	333.77	404	eQTL	chr14_59476235_T_TCAAC_b38	t	chr14_59476235_T_TCAAC_b38	ENSG00000126790.11	L3HYPDH		Brain_Caudate_basal_ganglia	3.86796e-23	0.0007694	-0.639665	0.0544787	-0.0239	0.0071	SAME	0.446591	0.136849	TRUE	TRUE
Cross-ancestry	autoGCC_q10	chr14:59270382:G:A	chr14:59336116:C:T	a	g	14:59336116	0.949519	-0.0518	0.952354	2.91e-08	59164061	59497831	333.77	404	eQTL	chr14_59480790_A_C_b38	a	chr14_59480790_A_C_b38	ENSG00000126790.11	L3HYPDH		Brain_Spinal_cord_cervical_c-1	2.60102e-27	0.0007584	-0.952354	0.0637775	-0.0239	0.0071	SAME	0.508906	0.155145	TRUE	TRUE
Cross-ancestry	autoGCC_q10	chr14:59270382:G:A	chr14:59336116:C:T	a	g	14:59336116	0.949519	-0.0518	0.952354	2.91e-08	59164061	59497831	333.77	404	eQTL	chr14_59476235_T_TCAAC_b38	t	chr14_59476235_T_TCAAC_b38	ENSG00000126790.11	L3HYPDH		Brain_Spinal_cord_cervical_c-1	2.60102e-27	0.0007694	-0.952354	0.0637775	-0.0239	0.0071	SAME	0.460684	0.140445	TRUE	TRUE
Cross-ancestry	autoGCC_q10	chr14:59270382:G:A	chr14:59336116:C:T	a	g	14:59336116	0.949519	-0.0518	0.603807	2.91e-08	59164061	59497831	333.77	404	eQTL	chr14_59480790_A_C_b38	a	chr14_59480790_A_C_b38	ENSG00000126790.11	L3HYPDH		Brain_Hypothalamus	1.90483e-16	0.0007584	-0.603807	0.0639137	-0.0239	0.0071	SAME	0.53089	0.239082	TRUE	TRUE
Cross-ancestry	autoGCC_q10	chr14:59270382:G:A	chr14:59336116:C:T	a	g	14:59336116	0.949519	-0.0518	0.603807	2.91e-08	59164061	59497831	333.77	404	eQTL	chr14_59476235_T_TCAAC_b38	t	chr14_59476235_T_TCAAC_b38	ENSG00000126790.11	L3HYPDH		Brain_Hypothalamus	1.90483e-16	0.0007694	-0.603807	0.0639137	-0.0239	0.0071	SAME	0.13801	0.0621517	TRUE	TRUE
Cross-ancestry	autoGCC_q10	chr14:59270382:G:A	chr14:59336116:C:T	a	g	14:59336116	0.949519	-0.0518	0.620387	2.91e-08	59164061	59497831	333.77	404	eQTL	chr14_59497043_G_A_b38	a	chr14_59497043_G_A_b38	ENSG00000126790.11	L3HYPDH		Brain_Hypothalamus	3.9704e-17	0.000683	-0.620387	0.0638025	0.0241	0.0071	OPPOSITE	0.161466	0.0727147	TRUE	TRUE
Cross-ancestry	autoGCC_q10	chr14:59270382:G:A	chr14:59336116:C:T	a	g	14:59336116	0.949519	-0.0518	0.620387	2.91e-08	59164061	59497831	333.77	404	eQTL	chr14_59496490_G_C_b38	c	chr14_59496490_G_C_b38	ENSG00000126790.11	L3HYPDH		Brain_Hypothalamus	3.9704e-17	0.0006914	-0.620387	0.0638025	0.024	0.0071	OPPOSITE	0.137264	0.0618156	TRUE	TRUE
Cross-ancestry	autoGCC_q10	chr14:59270382:G:A	chr14:59336116:C:T	a	g	14:59336116	0.949519	-0.0518	0.620438	2.91e-08	59164061	59497831	333.77	404	eQTL	chr14_59480790_A_C_b38	a	chr14_59480790_A_C_b38	ENSG00000126790.11	L3HYPDH		Brain_Cerebellum	7.27654e-21	0.0007584	-0.620438	0.057723	-0.0239	0.0071	SAME	0.517024	0.157857	TRUE	TRUE
Cross-ancestry	autoGCC_q10	chr14:59270382:G:A	chr14:59336116:C:T	a	g	14:59336116	0.949519	-0.0518	0.620438	2.91e-08	59164061	59497831	333.77	404	eQTL	chr14_59476235_T_TCAAC_b38	t	chr14_59476235_T_TCAAC_b38	ENSG00000126790.11	L3HYPDH		Brain_Cerebellum	7.27654e-21	0.0007694	-0.620438	0.057723	-0.0239	0.0071	SAME	0.452287	0.138091	TRUE	TRUE
Cross-ancestry	autoGCC_q10	chr14:59270382:G:A	chr14:59336116:C:T	a	g	14:59336116	0.949519	-0.0518	0.6484	2.91e-08	59164061	59497831	333.77	404	eQTL	chr14_59480790_A_C_b38	a	chr14_59480790_A_C_b38	ENSG00000126790.11	L3HYPDH		Brain_Nucleus_accumbens_basal_ganglia	1.06093e-22	0.0007584	-0.6484	0.0564784	-0.0239	0.0071	SAME	0.516465	0.157698	TRUE	TRUE
Cross-ancestry	autoGCC_q10	chr14:59270382:G:A	chr14:59336116:C:T	a	g	14:59336116	0.949519	-0.0518	0.6484	2.91e-08	59164061	59497831	333.77	404	eQTL	chr14_59476235_T_TCAAC_b38	t	chr14_59476235_T_TCAAC_b38	ENSG00000126790.11	L3HYPDH		Brain_Nucleus_accumbens_basal_ganglia	1.06093e-22	0.0007694	-0.6484	0.0564784	-0.0239	0.0071	SAME	0.452792	0.138256	TRUE	TRUE
Cross-ancestry	autoGCC_q10	chr14:59270382:G:A	chr14:59336116:C:T	a	g	14:59336116	0.949519	-0.0518	0.749303	2.91e-08	59164061	59497831	333.77	404	eQTL	chr14_59480790_A_C_b38	a	chr14_59480790_A_C_b38	ENSG00000126790.11	L3HYPDH		Brain_Putamen_basal_ganglia	6.22861e-21	0.0007584	-0.749303	0.0665842	-0.0239	0.0071	SAME	0.526096	0.169006	TRUE	TRUE
Cross-ancestry	autoGCC_q10	chr14:59270382:G:A	chr14:59336116:C:T	a	g	14:59336116	0.949519	-0.0518	0.749303	2.91e-08	59164061	59497831	333.77	404	eQTL	chr14_59476235_T_TCAAC_b38	t	chr14_59476235_T_TCAAC_b38	ENSG00000126790.11	L3HYPDH		Brain_Putamen_basal_ganglia	6.22861e-21	0.0007694	-0.749303	0.0665842	-0.0239	0.0071	SAME	0.400129	0.12854	TRUE	TRUE
Cross-ancestry	autoGCC_q10	chr14:59270382:G:A	chr14:59336116:C:T	a	g	14:59336116	0.949519	-0.0518	0.335614	2.91e-08	59164061	59497831	333.77	404	eQTL	chr14_59480790_A_C_b38	a	chr14_59480790_A_C_b38	ENSG00000151838.11	CCDC175		Artery_Aorta	1.96088e-07	0.0007584	-0.335614	0.0630801	-0.0239	0.0071	SAME	0.419325	0.0190261	TRUE	TRUE
Cross-ancestry	autoGCC_q10	chr14:59270382:G:A	chr14:59336116:C:T	a	g	14:59336116	0.949519	-0.0518	0.606166	2.91e-08	59164061	59497831	333.77	404	eQTL	chr14_59480790_A_C_b38	a	chr14_59480790_A_C_b38	ENSG00000126790.11	L3HYPDH		Artery_Aorta	1.51627e-29	0.0007584	-0.606166	0.0483619	-0.0239	0.0071	SAME	0.551181	0.17002	TRUE	TRUE
Cross-ancestry	autoGCC_q10	chr14:59270382:G:A	chr14:59336116:C:T	a	g	14:59336116	0.949519	-0.0518	0.197481	2.91e-08	59164061	59497831	333.77	404	eQTL	chr14_59480790_A_C_b38	a	chr14_59480790_A_C_b38	ENSG00000100592.15	DAAM1		Artery_Aorta	7.55409e-07	0.0007584	-0.197481	0.0391233	-0.0239	0.0071	SAME	0.465387	0.0193109	TRUE	TRUE
Cross-ancestry	autoGCC_q10	chr14:59270382:G:A	chr14:59336116:C:T	a	g	14:59336116	0.949519	-0.0518	0.245445	2.91e-08	59164061	59497831	333.77	404	eQTL	chr14_59480790_A_C_b38	a	chr14_59480790_A_C_b38	ENSG00000139970.16	RTN1		Artery_Aorta	1.73363e-05	0.0007584	-0.245445	0.056249	-0.0239	0.0071	SAME	0.233928	0.0674257	TRUE	TRUE
Cross-ancestry	autoGCC_q10	chr14:59270382:G:A	chr14:59336116:C:T	a	g	14:59336116	0.949519	-0.0518	0.601429	2.91e-08	59164061	59497831	333.77	404	eQTL	chr14_59476235_T_TCAAC_b38	t	chr14_59476235_T_TCAAC_b38	ENSG00000126790.11	L3HYPDH		Artery_Aorta	1.54104e-29	0.0007694	-0.601429	0.0479914	-0.0239	0.0071	SAME	0.412604	0.127274	TRUE	TRUE
Cross-ancestry	autoGCC_q10	chr14:59270382:G:A	chr14:59336116:C:T	a	g	14:59336116	0.949519	-0.0518	0.246629	2.91e-08	59164061	59497831	333.77	404	eQTL	chr14_59476235_T_TCAAC_b38	t	chr14_59476235_T_TCAAC_b38	ENSG00000139970.16	RTN1		Artery_Aorta	1.34523e-05	0.0007694	-0.246629	0.0557726	-0.0239	0.0071	SAME	0.268658	0.0774362	TRUE	TRUE
Cross-ancestry	autoGCC_q10	chr14:59270382:G:A	chr14:59336116:C:T	a	g	14:59336116	0.949519	-0.0518	0.245445	2.91e-08	59164061	59497831	333.77	404	eQTL	chr14_59480956_G_T_b38	t	chr14_59480956_G_T_b38	ENSG00000139970.16	RTN1		Artery_Aorta	1.73363e-05	0.0005989	-0.245445	0.056249	0.0243	0.0071	OPPOSITE	0.497386	0.143363	TRUE	TRUE
Cross-ancestry	autoGCC_q10	chr14:59270382:G:A	chr14:59336116:C:T	a	g	14:59336116	0.949519	-0.0518	0.282411	2.91e-08	59164061	59497831	333.77	404	eQTL	chr14_59480790_A_C_b38	a	chr14_59480790_A_C_b38	ENSG00000181619.11	GPR135		Cells_Cultured_fibroblasts	8.64575e-20	0.0007584	0.282411	0.0294558	-0.0239	0.0071	OPPOSITE	0.506117	0.159212	TRUE	TRUE
Cross-ancestry	autoGCC_q10	chr14:59270382:G:A	chr14:59336116:C:T	a	g	14:59336116	0.949519	-0.0518	0.339926	2.91e-08	59164061	59497831	333.77	404	eQTL	chr14_59480790_A_C_b38	a	chr14_59480790_A_C_b38	ENSG00000126790.11	L3HYPDH		Cells_Cultured_fibroblasts	5.20371e-26	0.0007584	-0.339926	0.0300627	-0.0239	0.0071	SAME	0.516588	0.157783	TRUE	TRUE
Cross-ancestry	autoGCC_q10	chr14:59270382:G:A	chr14:59336116:C:T	a	g	14:59336116	0.949519	-0.0518	0.282411	2.91e-08	59164061	59497831	333.77	404	eQTL	chr14_59476235_T_TCAAC_b38	t	chr14_59476235_T_TCAAC_b38	ENSG00000181619.11	GPR135		Cells_Cultured_fibroblasts	8.64575e-20	0.0007694	0.282411	0.0294558	-0.0239	0.0071	OPPOSITE	0.411406	0.129418	TRUE	TRUE
Cross-ancestry	autoGCC_q10	chr14:59270382:G:A	chr14:59336116:C:T	a	g	14:59336116	0.949519	-0.0518	0.339926	2.91e-08	59164061	59497831	333.77	404	eQTL	chr14_59476235_T_TCAAC_b38	t	chr14_59476235_T_TCAAC_b38	ENSG00000126790.11	L3HYPDH		Cells_Cultured_fibroblasts	5.20371e-26	0.0007694	-0.339926	0.0300627	-0.0239	0.0071	SAME	0.452425	0.138185	TRUE	TRUE
Cross-ancestry	autoGCC_q10	chr14:59270382:G:A	chr14:59336116:C:T	a	g	14:59336116	0.949519	-0.0518	0.284831	2.91e-08	59164061	59497831	333.77	404	eQTL	chr14_59480956_G_T_b38	t	chr14_59480956_G_T_b38	ENSG00000181619.11	GPR135		Cells_Cultured_fibroblasts	7.54519e-20	0.0005989	0.284831	0.0296551	0.0243	0.0071	SAME	0.0343846	0.0108165	TRUE	TRUE
Cross-ancestry	autoGCC_q10	chr14:59270382:G:A	chr14:59336116:C:T	a	g	14:59336116	0.949519	-0.0518	0.867598	2.91e-08	59164061	59497831	333.77	404	eQTL	chr14_59480790_A_C_b38	a	chr14_59480790_A_C_b38	ENSG00000126790.11	L3HYPDH		Brain_Substantia_nigra	5.70156e-18	0.0007584	-0.867598	0.0799562	-0.0239	0.0071	SAME	0.513703	0.157048	TRUE	TRUE
Cross-ancestry	autoGCC_q10	chr14:59270382:G:A	chr14:59336116:C:T	a	g	14:59336116	0.949519	-0.0518	0.867598	2.91e-08	59164061	59497831	333.77	404	eQTL	chr14_59476235_T_TCAAC_b38	t	chr14_59476235_T_TCAAC_b38	ENSG00000126790.11	L3HYPDH		Brain_Substantia_nigra	5.70156e-18	0.0007694	-0.867598	0.0799562	-0.0239	0.0071	SAME	0.450179	0.137627	TRUE	TRUE
Cross-ancestry	autoGCC_q10	chr14:59270382:G:A	chr14:59336116:C:T	a	g	14:59336116	0.949519	-0.0518	0.66454	2.91e-08	59164061	59497831	333.77	404	eQTL	chr14_59480790_A_C_b38	a	chr14_59480790_A_C_b38	ENSG00000126790.11	L3HYPDH		Brain_Amygdala	1.04078e-15	0.0007584	-0.66454	0.0701905	-0.0239	0.0071	SAME	0.509047	0.156176	TRUE	TRUE
Cross-ancestry	autoGCC_q10	chr14:59270382:G:A	chr14:59336116:C:T	a	g	14:59336116	0.949519	-0.0518	0.66454	2.91e-08	59164061	59497831	333.77	404	eQTL	chr14_59476235_T_TCAAC_b38	t	chr14_59476235_T_TCAAC_b38	ENSG00000126790.11	L3HYPDH		Brain_Amygdala	1.04078e-15	0.0007694	-0.66454	0.0701905	-0.0239	0.0071	SAME	0.442292	0.135695	TRUE	TRUE
Cross-ancestry	autoGCC_q10	chr14:59270382:G:A	chr14:59336116:C:T	a	g	14:59336116	0.949519	-0.0518	0.573243	2.91e-08	59164061	59497831	333.77	404	eQTL	chr14_59480790_A_C_b38	a	chr14_59480790_A_C_b38	ENSG00000126790.11	L3HYPDH		Brain_Cerebellar_Hemisphere	2.48602e-17	0.0007584	-0.573243	0.0587919	-0.0239	0.0071	SAME	0.510695	0.15652	TRUE	TRUE
Cross-ancestry	autoGCC_q10	chr14:59270382:G:A	chr14:59336116:C:T	a	g	14:59336116	0.949519	-0.0518	0.573243	2.91e-08	59164061	59497831	333.77	404	eQTL	chr14_59476235_T_TCAAC_b38	t	chr14_59476235_T_TCAAC_b38	ENSG00000126790.11	L3HYPDH		Brain_Cerebellar_Hemisphere	2.48602e-17	0.0007694	-0.573243	0.0587919	-0.0239	0.0071	SAME	0.444435	0.136213	TRUE	TRUE
Cross-ancestry	autoGCC_q10	chr14:59270382:G:A	chr14:59336116:C:T	a	g	14:59336116	0.949519	-0.0518	0.532009	2.91e-08	59164061	59497831	333.77	404	eQTL	chr14_59480790_A_C_b38	a	chr14_59480790_A_C_b38	ENSG00000126790.11	L3HYPDH		Artery_Coronary	3.54148e-12	0.0007584	-0.532009	0.0711049	-0.0239	0.0071	SAME	0.447814	0.202465	TRUE	TRUE
Cross-ancestry	autoGCC_q10	chr14:59270382:G:A	chr14:59336116:C:T	a	g	14:59336116	0.949519	-0.0518	0.532009	2.91e-08	59164061	59497831	333.77	404	eQTL	chr14_59476235_T_TCAAC_b38	t	chr14_59476235_T_TCAAC_b38	ENSG00000126790.11	L3HYPDH		Artery_Coronary	3.54148e-12	0.0007694	-0.532009	0.0711049	-0.0239	0.0071	SAME	0.179598	0.0811998	TRUE	TRUE
Cross-ancestry	autoGCC_q10	chr14:59270382:G:A	chr14:59336116:C:T	a	g	14:59336116	0.949519	-0.0518	0.532009	2.91e-08	59164061	59497831	333.77	404	eQTL	chr14_59480956_G_T_b38	t	chr14_59480956_G_T_b38	ENSG00000126790.11	L3HYPDH		Artery_Coronary	3.54148e-12	0.0005989	-0.532009	0.0711049	0.0243	0.0071	OPPOSITE	0.0587738	0.0265727	TRUE	TRUE
Cross-ancestry	autoGCC_q10	chr14:59270382:G:A	chr14:59336116:C:T	a	g	14:59336116	0.949519	-0.0518	0.547178	2.91e-08	59164061	59497831	333.77	404	eQTL	chr14_59497043_G_A_b38	a	chr14_59497043_G_A_b38	ENSG00000126790.11	L3HYPDH		Artery_Coronary	6.1963e-13	0.000683	-0.547178	0.0703095	0.0241	0.0071	OPPOSITE	0.168633	0.076242	TRUE	TRUE
Cross-ancestry	autoGCC_q10	chr14:59270382:G:A	chr14:59336116:C:T	a	g	14:59336116	0.949519	-0.0518	0.547178	2.91e-08	59164061	59497831	333.77	404	eQTL	chr14_59496490_G_C_b38	c	chr14_59496490_G_C_b38	ENSG00000126790.11	L3HYPDH		Artery_Coronary	6.1963e-13	0.0006914	-0.547178	0.0703095	0.024	0.0071	OPPOSITE	0.143357	0.0648142	TRUE	TRUE
Cross-ancestry	autoGCC_q10	chr14:59270382:G:A	chr14:59336116:C:T	a	g	14:59336116	0.949519	-0.0518	0.771639	2.91e-08	59164061	59497831	333.77	404	eQTL	chr14_59480790_A_C_b38	a	chr14_59480790_A_C_b38	ENSG00000126790.11	L3HYPDH		Nerve_Tibial	8.23957e-63	0.0007584	-0.771639	0.03932	-0.0239	0.0071	SAME	0.497885	0.151473	TRUE	TRUE
Cross-ancestry	autoGCC_q10	chr14:59270382:G:A	chr14:59336116:C:T	a	g	14:59336116	0.949519	-0.0518	0.175269	2.91e-08	59164061	59497831	333.77	404	eQTL	chr14_59480790_A_C_b38	a	chr14_59480790_A_C_b38	ENSG00000181619.11	GPR135		Nerve_Tibial	1.70798e-08	0.0007584	0.175269	0.0305299	-0.0239	0.0071	OPPOSITE	0.447157	0.142845	TRUE	TRUE
Cross-ancestry	autoGCC_q10	chr14:59270382:G:A	chr14:59336116:C:T	a	g	14:59336116	0.949519	-0.0518	0.0996955	2.91e-08	59164061	59497831	333.77	404	eQTL	chr14_59480790_A_C_b38	a	chr14_59480790_A_C_b38	ENSG00000050130.17	JKAMP		Nerve_Tibial	4.81485e-05	0.0007584	0.0996955	0.0242965	-0.0239	0.0071	OPPOSITE	0.301364	0.139114	TRUE	TRUE
Cross-ancestry	autoGCC_q10	chr14:59270382:G:A	chr14:59336116:C:T	a	g	14:59336116	0.949519	-0.0518	0.771639	2.91e-08	59164061	59497831	333.77	404	eQTL	chr14_59476235_T_TCAAC_b38	t	chr14_59476235_T_TCAAC_b38	ENSG00000126790.11	L3HYPDH		Nerve_Tibial	8.23957e-63	0.0007694	-0.771639	0.03932	-0.0239	0.0071	SAME	0.472103	0.143629	TRUE	TRUE
Cross-ancestry	autoGCC_q10	chr14:59270382:G:A	chr14:59336116:C:T	a	g	14:59336116	0.949519	-0.0518	0.175269	2.91e-08	59164061	59497831	333.77	404	eQTL	chr14_59476235_T_TCAAC_b38	t	chr14_59476235_T_TCAAC_b38	ENSG00000181619.11	GPR135		Nerve_Tibial	1.70798e-08	0.0007694	0.175269	0.0305299	-0.0239	0.0071	OPPOSITE	0.36127	0.115409	TRUE	TRUE
Cross-ancestry	autoGCC_q10	chr14:59270382:G:A	chr14:59336116:C:T	a	g	14:59336116	0.949519	-0.0518	0.0996955	2.91e-08	59164061	59497831	333.77	404	eQTL	chr14_59476235_T_TCAAC_b38	t	chr14_59476235_T_TCAAC_b38	ENSG00000050130.17	JKAMP		Nerve_Tibial	4.81485e-05	0.0007694	0.0996955	0.0242965	-0.0239	0.0071	OPPOSITE	0.202738	0.0935869	TRUE	TRUE
Cross-ancestry	autoGCC_q10	chr14:59270382:G:A	chr14:59336116:C:T	a	g	14:59336116	0.949519	-0.0518	0.175269	2.91e-08	59164061	59497831	333.77	404	eQTL	chr14_59480956_G_T_b38	t	chr14_59480956_G_T_b38	ENSG00000181619.11	GPR135		Nerve_Tibial	1.70798e-08	0.0005989	0.175269	0.0305299	0.0243	0.0071	SAME	0.159791	0.0510457	TRUE	TRUE
Cross-ancestry	autoGCC_q10	chr14:59270382:G:A	chr14:59336116:C:T	a	g	14:59336116	0.949519	-0.0518	0.0996955	2.91e-08	59164061	59497831	333.77	404	eQTL	chr14_59480956_G_T_b38	t	chr14_59480956_G_T_b38	ENSG00000050130.17	JKAMP		Nerve_Tibial	4.81485e-05	0.0005989	0.0996955	0.0242965	0.0243	0.0071	SAME	0.181515	0.08379	TRUE	TRUE
Cross-ancestry	autoGCC_q10	chr14:59270382:G:A	chr14:59336116:C:T	a	g	14:59336116	0.949519	-0.0518	0.111156	2.91e-08	59164061	59497831	333.77	404	eQTL	chr14_59497043_G_A_b38	a	chr14_59497043_G_A_b38	ENSG00000050130.17	JKAMP		Nerve_Tibial	5.94259e-06	0.000683	0.111156	0.024261	0.0241	0.0071	SAME	0.147874	0.0682605	TRUE	TRUE
Cross-ancestry	autoGCC_q10	chr14:59270382:G:A	chr14:59336116:C:T	a	g	14:59336116	0.949519	-0.0518	0.111156	2.91e-08	59164061	59497831	333.77	404	eQTL	chr14_59496490_G_C_b38	c	chr14_59496490_G_C_b38	ENSG00000050130.17	JKAMP		Nerve_Tibial	5.94259e-06	0.0006914	0.111156	0.024261	0.024	0.0071	SAME	0.125709	0.0580291	TRUE	TRUE
Cross-ancestry	autoGCC_q10	chr14:59270382:G:A	chr14:59336116:C:T	a	g	14:59336116	0.949519	-0.0518	0.108545	2.91e-08	59164061	59497831	333.77	404	eQTL	chr14_59487263_C_T_b38	t	chr14_59487263_C_T_b38	ENSG00000050130.17	JKAMP		Nerve_Tibial	8.28852e-06	0.0003059	0.108545	0.024076	0.0256	0.0071	SAME	0.0274588	0.0126754	TRUE	TRUE
Cross-ancestry	autoGCC_q10	chr14:59270382:G:A	chr14:59336116:C:T	a	g	14:59336116	0.949519	-0.0518	0.633824	2.91e-08	59164061	59497831	333.77	404	eQTL	chr14_59480790_A_C_b38	a	chr14_59480790_A_C_b38	ENSG00000126790.11	L3HYPDH		Brain_Frontal_Cortex_BA9	1.78582e-18	0.0007584	-0.633824	0.0621118	-0.0239	0.0071	SAME	0.552171	0.23855	TRUE	TRUE
Cross-ancestry	autoGCC_q10	chr14:59270382:G:A	chr14:59336116:C:T	a	g	14:59336116	0.949519	-0.0518	0.633824	2.91e-08	59164061	59497831	333.77	404	eQTL	chr14_59476235_T_TCAAC_b38	t	chr14_59476235_T_TCAAC_b38	ENSG00000126790.11	L3HYPDH		Brain_Frontal_Cortex_BA9	1.78582e-18	0.0007694	-0.633824	0.0621118	-0.0239	0.0071	SAME	0.150656	0.0650869	TRUE	TRUE
Cross-ancestry	autoGCC_q10	chr14:59270382:G:A	chr14:59336116:C:T	a	g	14:59336116	0.949519	-0.0518	0.642862	2.91e-08	59164061	59497831	333.77	404	eQTL	chr14_59497043_G_A_b38	a	chr14_59497043_G_A_b38	ENSG00000126790.11	L3HYPDH		Brain_Frontal_Cortex_BA9	8.33489e-19	0.000683	-0.642862	0.0621993	0.0241	0.0071	OPPOSITE	0.148008	0.063943	TRUE	TRUE
Cross-ancestry	autoGCC_q10	chr14:59270382:G:A	chr14:59336116:C:T	a	g	14:59336116	0.949519	-0.0518	0.642862	2.91e-08	59164061	59497831	333.77	404	eQTL	chr14_59496490_G_C_b38	c	chr14_59496490_G_C_b38	ENSG00000126790.11	L3HYPDH		Brain_Frontal_Cortex_BA9	8.33489e-19	0.0006914	-0.642862	0.0621993	0.024	0.0071	OPPOSITE	0.125824	0.0543587	TRUE	TRUE
Cross-ancestry	autoGCC_q10	chr14:59270382:G:A	chr14:59336116:C:T	a	g	14:59336116	0.949519	-0.0518	0.627083	2.91e-08	59164061	59497831	333.77	404	eQTL	chr14_59480790_A_C_b38	a	chr14_59480790_A_C_b38	ENSG00000126790.11	L3HYPDH		Brain_Anterior_cingulate_cortex_BA24	8.92185e-14	0.0007584	-0.627083	0.074543	-0.0239	0.0071	SAME	0.501365	0.154471	TRUE	TRUE
Cross-ancestry	autoGCC_q10	chr14:59270382:G:A	chr14:59336116:C:T	a	g	14:59336116	0.949519	-0.0518	0.627083	2.91e-08	59164061	59497831	333.77	404	eQTL	chr14_59476235_T_TCAAC_b38	t	chr14_59476235_T_TCAAC_b38	ENSG00000126790.11	L3HYPDH		Brain_Anterior_cingulate_cortex_BA24	8.92185e-14	0.0007694	-0.627083	0.074543	-0.0239	0.0071	SAME	0.4339	0.133685	TRUE	TRUE
Cross-ancestry	autoGCC_q10	chr14:59270382:G:A	chr14:59336116:C:T	a	g	14:59336116	0.949519	-0.0518	0.627083	2.91e-08	59164061	59497831	333.77	404	eQTL	chr14_59480956_G_T_b38	t	chr14_59480956_G_T_b38	ENSG00000126790.11	L3HYPDH		Brain_Anterior_cingulate_cortex_BA24	8.92185e-14	0.0005989	-0.627083	0.074543	0.0243	0.0071	OPPOSITE	0.0342321	0.0105469	TRUE	TRUE
Cross-ancestry	autoGCC_q10	chr14:59270382:G:A	chr14:59336116:C:T	a	g	14:59336116	0.949519	-0.0518	0.733497	2.91e-08	59164061	59497831	333.77	404	eQTL	chr14_59480790_A_C_b38	a	chr14_59480790_A_C_b38	ENSG00000126790.11	L3HYPDH		Brain_Cortex	8.30456e-27	0.0007584	-0.733497	0.0568092	-0.0239	0.0071	SAME	0.513204	0.15657	TRUE	TRUE
Cross-ancestry	autoGCC_q10	chr14:59270382:G:A	chr14:59336116:C:T	a	g	14:59336116	0.949519	-0.0518	0.733497	2.91e-08	59164061	59497831	333.77	404	eQTL	chr14_59476235_T_TCAAC_b38	t	chr14_59476235_T_TCAAC_b38	ENSG00000126790.11	L3HYPDH		Brain_Cortex	8.30456e-27	0.0007694	-0.733497	0.0568092	-0.0239	0.0071	SAME	0.45641	0.139243	TRUE	TRUE
Cross-ancestry	autoGCC_q10	chr14:59270382:G:A	chr14:59336116:C:T	a	g	14:59336116	0.949519	-0.0518	0.196308	2.91e-08	59164061	59497831	333.77	404	eQTL	chr14_59480790_A_C_b38	a	chr14_59480790_A_C_b38	ENSG00000100592.15	DAAM1		Artery_Tibial	1.82087e-10	0.0007584	-0.196308	0.030168	-0.0239	0.0071	SAME	0.475169	0.170326	TRUE	TRUE
Cross-ancestry	autoGCC_q10	chr14:59270382:G:A	chr14:59336116:C:T	a	g	14:59336116	0.949519	-0.0518	0.225885	2.91e-08	59164061	59497831	333.77	404	eQTL	chr14_59480790_A_C_b38	a	chr14_59480790_A_C_b38	ENSG00000151838.11	CCDC175		Artery_Tibial	9.10946e-07	0.0007584	-0.225885	0.0454444	-0.0239	0.0071	SAME	0.0293503	0.0108553	TRUE	TRUE
Cross-ancestry	autoGCC_q10	chr14:59270382:G:A	chr14:59336116:C:T	a	g	14:59336116	0.949519	-0.0518	0.676339	2.91e-08	59164061	59497831	333.77	404	eQTL	chr14_59480790_A_C_b38	a	chr14_59480790_A_C_b38	ENSG00000126790.11	L3HYPDH		Artery_Tibial	8.48773e-53	0.0007584	-0.676339	0.0392771	-0.0239	0.0071	SAME	0.505107	0.154255	TRUE	TRUE
Cross-ancestry	autoGCC_q10	chr14:59270382:G:A	chr14:59336116:C:T	a	g	14:59336116	0.949519	-0.0518	0.196308	2.91e-08	59164061	59497831	333.77	404	eQTL	chr14_59476235_T_TCAAC_b38	t	chr14_59476235_T_TCAAC_b38	ENSG00000100592.15	DAAM1		Artery_Tibial	1.82087e-10	0.0007694	-0.196308	0.030168	-0.0239	0.0071	SAME	0.304584	0.109179	TRUE	TRUE
Cross-ancestry	autoGCC_q10	chr14:59270382:G:A	chr14:59336116:C:T	a	g	14:59336116	0.949519	-0.0518	0.676339	2.91e-08	59164061	59497831	333.77	404	eQTL	chr14_59476235_T_TCAAC_b38	t	chr14_59476235_T_TCAAC_b38	ENSG00000126790.11	L3HYPDH		Artery_Tibial	8.48773e-53	0.0007694	-0.676339	0.0392771	-0.0239	0.0071	SAME	0.462417	0.141218	TRUE	TRUE
Cross-ancestry	autoGCC_q10	chr14:59270382:G:A	chr14:59336116:C:T	a	g	14:59336116	0.949519	-0.0518	0.19718	2.91e-08	59164061	59497831	333.77	404	eQTL	chr14_59480956_G_T_b38	t	chr14_59480956_G_T_b38	ENSG00000100592.15	DAAM1		Artery_Tibial	2.07045e-10	0.0005989	-0.19718	0.0303998	0.0243	0.0071	OPPOSITE	0.0728257	0.0261046	TRUE	TRUE
Cross-ancestry	autoGCC_q10	chr14:59270382:G:A	chr14:59336116:C:T	a	g	14:59336116	0.949519	-0.0518	0.238435	2.91e-08	59164061	59497831	333.77	404	eQTL	chr14_59480956_G_T_b38	t	chr14_59480956_G_T_b38	ENSG00000151838.11	CCDC175		Artery_Tibial	2.59757e-07	0.0005989	-0.238435	0.0456746	0.0243	0.0071	OPPOSITE	0.940131	0.347712	TRUE	TRUE
Cross-ancestry	autoGCC_q10	chr14:59270382:G:A	chr14:59336116:C:T	a	g	14:59336116	0.949519	-0.0518	0.203821	2.91e-08	59164061	59497831	333.77	404	eQTL	chr14_59480956_G_T_b38	t	chr14_59480956_G_T_b38	ENSG00000139970.16	RTN1		Artery_Tibial	3.5856e-07	0.0005989	-0.203821	0.0395224	0.0243	0.0071	OPPOSITE	0.81174	0.0198271	TRUE	TRUE
Cross-ancestry	autoGCC_q10	chr14:59270382:G:A	chr14:59336116:C:T	a	g	14:59336116	0.949519	-0.0518	0.202233	2.91e-08	59164061	59497831	333.77	404	eQTL	chr14_59489880_CTCTT_C_b38	ctctt	chr14_59489880_CTCTT_C_b38	ENSG00000100592.15	DAAM1		Artery_Tibial	6.10929e-11	0.0006162	-0.202233	0.0302611	-0.0242	0.0071	SAME	0.0975906	0.0349817	TRUE	TRUE
Cross-ancestry	autoGCC_q10	chr14:59270382:G:A	chr14:59336116:C:T	a	g	14:59336116	0.949519	-0.0518	0.593271	2.91e-08	59164061	59497831	333.77	404	eQTL	chr14_59480790_A_C_b38	a	chr14_59480790_A_C_b38	ENSG00000126790.11	L3HYPDH		Brain_Hippocampus	2.079e-19	0.0007584	-0.593271	0.0553554	-0.0239	0.0071	SAME	0.513491	0.157028	TRUE	TRUE
Cross-ancestry	autoGCC_q10	chr14:59270382:G:A	chr14:59336116:C:T	a	g	14:59336116	0.949519	-0.0518	0.593271	2.91e-08	59164061	59497831	333.77	404	eQTL	chr14_59476235_T_TCAAC_b38	t	chr14_59476235_T_TCAAC_b38	ENSG00000126790.11	L3HYPDH		Brain_Hippocampus	2.079e-19	0.0007694	-0.593271	0.0553554	-0.0239	0.0071	SAME	0.449463	0.137448	TRUE	TRUE
Cross-ancestry	autoGCC_q10	chr14:59270382:G:A	chr14:59336116:C:T	a	g	14:59336116	0.949519	-0.0518	0.437882	2.91e-08	59164061	59497831	333.77	404	sQTL	chr14_59480790_A_C_b38	a	chr14_59480790_A_C_b38	ENSG00000126790.11	L3HYPDH	chr14:59473090:59474439:clu_18697:ENSG00000126790.11	Artery_Coronary	2.90786e-08	0.0007584	-0.437882	0.0756272	-0.0239	0.0071	SAME	0.364365	0.162876	FALSE	TRUE
Cross-ancestry	autoGCC_q10	chr14:59270382:G:A	chr14:59336116:C:T	a	g	14:59336116	0.949519	-0.0518	0.437882	2.91e-08	59164061	59497831	333.77	404	sQTL	chr14_59476235_T_TCAAC_b38	t	chr14_59476235_T_TCAAC_b38	ENSG00000126790.11	L3HYPDH	chr14:59473090:59474439:clu_18697:ENSG00000126790.11	Artery_Coronary	2.90786e-08	0.0007694	-0.437882	0.0756272	-0.0239	0.0071	SAME	0.212234	0.0948712	FALSE	TRUE
Cross-ancestry	autoGCC_q10	chr14:59270382:G:A	chr14:59336116:C:T	a	g	14:59336116	0.949519	-0.0518	0.437882	2.91e-08	59164061	59497831	333.77	404	sQTL	chr14_59480956_G_T_b38	t	chr14_59480956_G_T_b38	ENSG00000126790.11	L3HYPDH	chr14:59473090:59474439:clu_18697:ENSG00000126790.11	Artery_Coronary	2.90786e-08	0.0005989	-0.437882	0.0756272	0.0243	0.0071	OPPOSITE	0.124775	0.0557761	FALSE	TRUE
Cross-ancestry	autoGCC_q10	chr14:59270382:G:A	chr14:59336116:C:T	a	g	14:59336116	0.949519	-0.0518	0.436035	2.91e-08	59164061	59497831	333.77	404	sQTL	chr14_59497043_G_A_b38	a	chr14_59497043_G_A_b38	ENSG00000126790.11	L3HYPDH	chr14:59473090:59474439:clu_18697:ENSG00000126790.11	Artery_Coronary	3.1616e-08	0.000683	-0.436035	0.0755244	0.0241	0.0071	OPPOSITE	0.149723	0.0669281	FALSE	TRUE
Cross-ancestry	autoGCC_q10	chr14:59270382:G:A	chr14:59336116:C:T	a	g	14:59336116	0.949519	-0.0518	0.436035	2.91e-08	59164061	59497831	333.77	404	sQTL	chr14_59496490_G_C_b38	c	chr14_59496490_G_C_b38	ENSG00000126790.11	L3HYPDH	chr14:59473090:59474439:clu_18697:ENSG00000126790.11	Artery_Coronary	3.1616e-08	0.0006914	-0.436035	0.0755244	0.024	0.0071	OPPOSITE	0.127281	0.0568964	FALSE	TRUE
Cross-ancestry	autoGCC_q10	chr14:59270382:G:A	chr14:59336116:C:T	a	g	14:59336116	0.949519	-0.0518	0.572414	2.91e-08	59164061	59497831	333.77	404	sQTL	chr14_59480790_A_C_b38	a	chr14_59480790_A_C_b38	ENSG00000126790.11	L3HYPDH	chr14:59461173:59475869:clu_18329:ENSG00000126790.11	Brain_Cerebellar_Hemisphere	6.3689e-08	0.0007584	0.572414	0.100546	-0.0239	0.0071	OPPOSITE	0.440744	0.140287	FALSE	TRUE
Cross-ancestry	autoGCC_q10	chr14:59270382:G:A	chr14:59336116:C:T	a	g	14:59336116	0.949519	-0.0518	0.513463	2.91e-08	59164061	59497831	333.77	404	sQTL	chr14_59480790_A_C_b38	a	chr14_59480790_A_C_b38	ENSG00000151838.11	CCDC175	chr14:59525434:59527095:clu_18341:ENSG00000151838.11	Brain_Cerebellar_Hemisphere	1.82265e-06	0.0007584	0.513463	0.103355	-0.0239	0.0071	OPPOSITE	0.316787	0.150449	FALSE	TRUE
Cross-ancestry	autoGCC_q10	chr14:59270382:G:A	chr14:59336116:C:T	a	g	14:59336116	0.949519	-0.0518	0.677763	2.91e-08	59164061	59497831	333.77	404	sQTL	chr14_59480790_A_C_b38	a	chr14_59480790_A_C_b38	ENSG00000181619.11	GPR135	chr14:59455760:59456438:clu_18327:ENSG00000181619.11	Brain_Cerebellar_Hemisphere	2.55303e-09	0.0007584	-0.677763	0.1069	-0.0239	0.0071	SAME	0.391323	0.161923	FALSE	TRUE
Cross-ancestry	autoGCC_q10	chr14:59270382:G:A	chr14:59336116:C:T	a	g	14:59336116	0.949519	-0.0518	0.572414	2.91e-08	59164061	59497831	333.77	404	sQTL	chr14_59476235_T_TCAAC_b38	t	chr14_59476235_T_TCAAC_b38	ENSG00000126790.11	L3HYPDH	chr14:59461173:59475869:clu_18329:ENSG00000126790.11	Brain_Cerebellar_Hemisphere	6.3689e-08	0.0007694	0.572414	0.100546	-0.0239	0.0071	OPPOSITE	0.374302	0.119139	FALSE	TRUE
Cross-ancestry	autoGCC_q10	chr14:59270382:G:A	chr14:59336116:C:T	a	g	14:59336116	0.949519	-0.0518	0.513463	2.91e-08	59164061	59497831	333.77	404	sQTL	chr14_59476235_T_TCAAC_b38	t	chr14_59476235_T_TCAAC_b38	ENSG00000151838.11	CCDC175	chr14:59525434:59527095:clu_18341:ENSG00000151838.11	Brain_Cerebellar_Hemisphere	1.82265e-06	0.0007694	0.513463	0.103355	-0.0239	0.0071	OPPOSITE	0.197639	0.0938633	FALSE	TRUE
Cross-ancestry	autoGCC_q10	chr14:59270382:G:A	chr14:59336116:C:T	a	g	14:59336116	0.949519	-0.0518	0.677763	2.91e-08	59164061	59497831	333.77	404	sQTL	chr14_59476235_T_TCAAC_b38	t	chr14_59476235_T_TCAAC_b38	ENSG00000181619.11	GPR135	chr14:59455760:59456438:clu_18327:ENSG00000181619.11	Brain_Cerebellar_Hemisphere	2.55303e-09	0.0007694	-0.677763	0.1069	-0.0239	0.0071	SAME	0.249169	0.103102	FALSE	TRUE
Cross-ancestry	autoGCC_q10	chr14:59270382:G:A	chr14:59336116:C:T	a	g	14:59336116	0.949519	-0.0518	0.572414	2.91e-08	59164061	59497831	333.77	404	sQTL	chr14_59480956_G_T_b38	t	chr14_59480956_G_T_b38	ENSG00000126790.11	L3HYPDH	chr14:59461173:59475869:clu_18329:ENSG00000126790.11	Brain_Cerebellar_Hemisphere	6.3689e-08	0.0005989	0.572414	0.100546	0.0243	0.0071	SAME	0.15349	0.0488552	FALSE	TRUE
Cross-ancestry	autoGCC_q10	chr14:59270382:G:A	chr14:59336116:C:T	a	g	14:59336116	0.949519	-0.0518	0.513463	2.91e-08	59164061	59497831	333.77	404	sQTL	chr14_59480956_G_T_b38	t	chr14_59480956_G_T_b38	ENSG00000151838.11	CCDC175	chr14:59525434:59527095:clu_18341:ENSG00000151838.11	Brain_Cerebellar_Hemisphere	1.82265e-06	0.0005989	0.513463	0.103355	0.0243	0.0071	SAME	0.152722	0.0725312	FALSE	TRUE
Cross-ancestry	autoGCC_q10	chr14:59270382:G:A	chr14:59336116:C:T	a	g	14:59336116	0.949519	-0.0518	0.677763	2.91e-08	59164061	59497831	333.77	404	sQTL	chr14_59480956_G_T_b38	t	chr14_59480956_G_T_b38	ENSG00000181619.11	GPR135	chr14:59455760:59456438:clu_18327:ENSG00000181619.11	Brain_Cerebellar_Hemisphere	2.55303e-09	0.0005989	-0.677763	0.1069	0.0243	0.0071	OPPOSITE	0.108213	0.0447765	FALSE	TRUE
Cross-ancestry	autoGCC_q10	chr14:59270382:G:A	chr14:59336116:C:T	a	g	14:59336116	0.949519	-0.0518	0.516223	2.91e-08	59164061	59497831	333.77	404	sQTL	chr14_59497043_G_A_b38	a	chr14_59497043_G_A_b38	ENSG00000151838.11	CCDC175	chr14:59525434:59527095:clu_18341:ENSG00000151838.11	Brain_Cerebellar_Hemisphere	2.20893e-06	0.000683	0.516223	0.10483	0.0241	0.0071	SAME	0.0796999	0.0378513	FALSE	TRUE
Cross-ancestry	autoGCC_q10	chr14:59270382:G:A	chr14:59336116:C:T	a	g	14:59336116	0.949519	-0.0518	0.675741	2.91e-08	59164061	59497831	333.77	404	sQTL	chr14_59497043_G_A_b38	a	chr14_59497043_G_A_b38	ENSG00000181619.11	GPR135	chr14:59455760:59456438:clu_18327:ENSG00000181619.11	Brain_Cerebellar_Hemisphere	4.85265e-09	0.000683	-0.675741	0.108745	0.0241	0.0071	OPPOSITE	0.0844947	0.0349625	FALSE	TRUE
Cross-ancestry	autoGCC_q10	chr14:59270382:G:A	chr14:59336116:C:T	a	g	14:59336116	0.949519	-0.0518	0.516223	2.91e-08	59164061	59497831	333.77	404	sQTL	chr14_59496490_G_C_b38	c	chr14_59496490_G_C_b38	ENSG00000151838.11	CCDC175	chr14:59525434:59527095:clu_18341:ENSG00000151838.11	Brain_Cerebellar_Hemisphere	2.20893e-06	0.0006914	0.516223	0.10483	0.024	0.0071	SAME	0.0677539	0.0321778	FALSE	TRUE
Cross-ancestry	autoGCC_q10	chr14:59270382:G:A	chr14:59336116:C:T	a	g	14:59336116	0.949519	-0.0518	0.675741	2.91e-08	59164061	59497831	333.77	404	sQTL	chr14_59496490_G_C_b38	c	chr14_59496490_G_C_b38	ENSG00000181619.11	GPR135	chr14:59455760:59456438:clu_18327:ENSG00000181619.11	Brain_Cerebellar_Hemisphere	4.85265e-09	0.0006914	-0.675741	0.108745	0.024	0.0071	OPPOSITE	0.0718299	0.029722	FALSE	TRUE
Cross-ancestry	autoGCC_q10	chr14:59270382:G:A	chr14:59336116:C:T	a	g	14:59336116	0.949519	-0.0518	0.518499	2.91e-08	59164061	59497831	333.77	404	sQTL	chr14_59489880_CTCTT_C_b38	ctctt	chr14_59489880_CTCTT_C_b38	ENSG00000151838.11	CCDC175	chr14:59525434:59527095:clu_18341:ENSG00000151838.11	Brain_Cerebellar_Hemisphere	1.59501e-06	0.0006162	0.518499	0.10374	-0.0242	0.0071	OPPOSITE	0.127269	0.0604427	FALSE	TRUE
Cross-ancestry	autoGCC_q10	chr14:59270382:G:A	chr14:59336116:C:T	a	g	14:59336116	0.949519	-0.0518	0.670237	2.91e-08	59164061	59497831	333.77	404	sQTL	chr14_59489880_CTCTT_C_b38	ctctt	chr14_59489880_CTCTT_C_b38	ENSG00000181619.11	GPR135	chr14:59455760:59456438:clu_18327:ENSG00000181619.11	Brain_Cerebellar_Hemisphere	4.81918e-09	0.0006162	-0.670237	0.107836	-0.0242	0.0071	SAME	0.0273324	0.0113097	FALSE	TRUE
Cross-ancestry	autoGCC_q10	chr14:59270382:G:A	chr14:59336116:C:T	a	g	14:59336116	0.949519	-0.0518	0.517138	2.91e-08	59164061	59497831	333.77	404	sQTL	chr14_59487263_C_T_b38	t	chr14_59487263_C_T_b38	ENSG00000151838.11	CCDC175	chr14:59525434:59527095:clu_18341:ENSG00000151838.11	Brain_Cerebellar_Hemisphere	1.747e-06	0.0003059	0.517138	0.103895	0.0256	0.0071	SAME	0.0581287	0.0276066	FALSE	TRUE
Cross-ancestry	autoGCC_q10	chr14:59270382:G:A	chr14:59336116:C:T	a	g	14:59336116	0.949519	-0.0518	0.680157	2.91e-08	59164061	59497831	333.77	404	sQTL	chr14_59487263_C_T_b38	t	chr14_59487263_C_T_b38	ENSG00000181619.11	GPR135	chr14:59455760:59456438:clu_18327:ENSG00000181619.11	Brain_Cerebellar_Hemisphere	2.76603e-09	0.0003059	-0.680157	0.107543	0.0256	0.0071	OPPOSITE	0.0580886	0.0240361	FALSE	TRUE
Cross-ancestry	autoGCC_q10	chr14:59270382:G:A	chr14:59336116:C:T	a	g	14:59336116	0.949519	-0.0518	0.520233	2.91e-08	59164061	59497831	333.77	404	sQTL	chr14_59480790_A_C_b38	a	chr14_59480790_A_C_b38	ENSG00000126790.11	L3HYPDH	chr14:59461173:59475869:clu_23215:ENSG00000126790.11	Nerve_Tibial	9.89423e-22	0.0007584	0.520233	0.0518502	-0.0239	0.0071	OPPOSITE	0.534679	0.177809	FALSE	TRUE
Cross-ancestry	autoGCC_q10	chr14:59270382:G:A	chr14:59336116:C:T	a	g	14:59336116	0.949519	-0.0518	0.520233	2.91e-08	59164061	59497831	333.77	404	sQTL	chr14_59476235_T_TCAAC_b38	t	chr14_59476235_T_TCAAC_b38	ENSG00000126790.11	L3HYPDH	chr14:59461173:59475869:clu_23215:ENSG00000126790.11	Nerve_Tibial	9.89423e-22	0.0007694	0.520233	0.0518502	-0.0239	0.0071	OPPOSITE	0.353315	0.117496	FALSE	TRUE
Cross-ancestry	autoGCC_q10	chr14:59270382:G:A	chr14:59336116:C:T	a	g	14:59336116	0.949519	-0.0518	0.523647	2.91e-08	59164061	59497831	333.77	404	sQTL	chr14_59489880_CTCTT_C_b38	ctctt	chr14_59489880_CTCTT_C_b38	ENSG00000126790.11	L3HYPDH	chr14:59461173:59475869:clu_23215:ENSG00000126790.11	Nerve_Tibial	5.71011e-22	0.0006162	0.523647	0.0518551	-0.0242	0.0071	OPPOSITE	0.0699629	0.0232663	FALSE	TRUE
Cross-ancestry	autoGCC_q10	chr14:59270382:G:A	chr14:59336116:C:T	a	g	14:59336116	0.949519	-0.0518	0.560431	2.91e-08	59164061	59497831	333.77	404	sQTL	chr14_59480790_A_C_b38	a	chr14_59480790_A_C_b38	ENSG00000151838.11	CCDC175	chr14:59525434:59527095:clu_19197:ENSG00000151838.11	Brain_Cerebellum	1.64202e-09	0.0007584	0.560431	0.0882623	-0.0239	0.0071	OPPOSITE	0.416895	0.197409	FALSE	TRUE
Cross-ancestry	autoGCC_q10	chr14:59270382:G:A	chr14:59336116:C:T	a	g	14:59336116	0.949519	-0.0518	0.560431	2.91e-08	59164061	59497831	333.77	404	sQTL	chr14_59476235_T_TCAAC_b38	t	chr14_59476235_T_TCAAC_b38	ENSG00000151838.11	CCDC175	chr14:59525434:59527095:clu_19197:ENSG00000151838.11	Brain_Cerebellum	1.64202e-09	0.0007694	0.560431	0.0882623	-0.0239	0.0071	OPPOSITE	0.217239	0.102867	FALSE	TRUE
Cross-ancestry	autoGCC_q10	chr14:59270382:G:A	chr14:59336116:C:T	a	g	14:59336116	0.949519	-0.0518	0.54523	2.91e-08	59164061	59497831	333.77	404	sQTL	chr14_59497043_G_A_b38	a	chr14_59497043_G_A_b38	ENSG00000151838.11	CCDC175	chr14:59525434:59527095:clu_19197:ENSG00000151838.11	Brain_Cerebellum	8.2536e-09	0.000683	0.54523	0.0902376	0.0241	0.0071	SAME	0.110977	0.05255	FALSE	TRUE
Cross-ancestry	autoGCC_q10	chr14:59270382:G:A	chr14:59336116:C:T	a	g	14:59336116	0.949519	-0.0518	0.54523	2.91e-08	59164061	59497831	333.77	404	sQTL	chr14_59496490_G_C_b38	c	chr14_59496490_G_C_b38	ENSG00000151838.11	CCDC175	chr14:59525434:59527095:clu_19197:ENSG00000151838.11	Brain_Cerebellum	8.2536e-09	0.0006914	0.54523	0.0902376	0.024	0.0071	SAME	0.0943425	0.0446734	FALSE	TRUE
Cross-ancestry	autoGCC_q10	chr14:59270382:G:A	chr14:59336116:C:T	a	g	14:59336116	0.949519	-0.0518	0.543127	2.91e-08	59164061	59497831	333.77	404	sQTL	chr14_59489880_CTCTT_C_b38	ctctt	chr14_59489880_CTCTT_C_b38	ENSG00000151838.11	CCDC175	chr14:59525434:59527095:clu_19197:ENSG00000151838.11	Brain_Cerebellum	7.11748e-09	0.0006162	0.543127	0.0894661	-0.0242	0.0071	OPPOSITE	0.0650617	0.0308082	FALSE	TRUE
Cross-ancestry	autoGCC_q10	chr14:59270382:G:A	chr14:59336116:C:T	a	g	14:59336116	0.949519	-0.0518	0.549916	2.91e-08	59164061	59497831	333.77	404	sQTL	chr14_59487263_C_T_b38	t	chr14_59487263_C_T_b38	ENSG00000151838.11	CCDC175	chr14:59525434:59527095:clu_19197:ENSG00000151838.11	Brain_Cerebellum	4.49808e-09	0.0003059	0.549916	0.0892891	0.0256	0.0071	SAME	0.0917336	0.043438	FALSE	TRUE
Cross-ancestry	autoGCC_q10	chr14:59270382:G:A	chr14:59336116:C:T	a	g	14:59336116	0.949519	-0.0518	0.4847	2.91e-08	59164061	59497831	333.77	404	sQTL	chr14_59480790_A_C_b38	a	chr14_59480790_A_C_b38	ENSG00000050130.17	JKAMP	chr14:59484593:59486681:clu_19992:ENSG00000050130.17	Artery_Aorta	5.08133e-12	0.0007584	0.4847	0.0678657	-0.0239	0.0071	OPPOSITE	0.448566	0.205853	FALSE	TRUE
Cross-ancestry	autoGCC_q10	chr14:59270382:G:A	chr14:59336116:C:T	a	g	14:59336116	0.949519	-0.0518	0.414521	2.91e-08	59164061	59497831	333.77	404	sQTL	chr14_59480790_A_C_b38	a	chr14_59480790_A_C_b38	ENSG00000126790.11	L3HYPDH	chr14:59473090:59474439:clu_19985:ENSG00000126790.11	Artery_Aorta	2.10436e-12	0.0007584	-0.414521	0.056945	-0.0239	0.0071	SAME	0.572393	0.252492	FALSE	TRUE
Cross-ancestry	autoGCC_q10	chr14:59270382:G:A	chr14:59336116:C:T	a	g	14:59336116	0.949519	-0.0518	0.678486	2.91e-08	59164061	59497831	333.77	404	sQTL	chr14_59480790_A_C_b38	a	chr14_59480790_A_C_b38	ENSG00000181619.11	GPR135	chr14:59455760:59456438:clu_19983:ENSG00000181619.11	Artery_Aorta	1.96849e-19	0.0007584	-0.678486	0.0710256	-0.0239	0.0071	SAME	0.812655	0.265829	FALSE	TRUE
Cross-ancestry	autoGCC_q10	chr14:59270382:G:A	chr14:59336116:C:T	a	g	14:59336116	0.949519	-0.0518	0.480939	2.91e-08	59164061	59497831	333.77	404	sQTL	chr14_59476235_T_TCAAC_b38	t	chr14_59476235_T_TCAAC_b38	ENSG00000050130.17	JKAMP	chr14:59484593:59486681:clu_19992:ENSG00000050130.17	Artery_Aorta	5.32676e-12	0.0007694	0.480939	0.067409	-0.0239	0.0071	OPPOSITE	0.160587	0.0736955	FALSE	TRUE
Cross-ancestry	autoGCC_q10	chr14:59270382:G:A	chr14:59336116:C:T	a	g	14:59336116	0.949519	-0.0518	0.408373	2.91e-08	59164061	59497831	333.77	404	sQTL	chr14_59476235_T_TCAAC_b38	t	chr14_59476235_T_TCAAC_b38	ENSG00000126790.11	L3HYPDH	chr14:59473090:59474439:clu_19985:ENSG00000126790.11	Artery_Aorta	3.23816e-12	0.0007694	-0.408373	0.0566207	-0.0239	0.0071	SAME	0.0507629	0.0223923	FALSE	TRUE
Cross-ancestry	autoGCC_q10	chr14:59270382:G:A	chr14:59336116:C:T	a	g	14:59336116	0.949519	-0.0518	0.671852	2.91e-08	59164061	59497831	333.77	404	sQTL	chr14_59476235_T_TCAAC_b38	t	chr14_59476235_T_TCAAC_b38	ENSG00000181619.11	GPR135	chr14:59455760:59456438:clu_19983:ENSG00000181619.11	Artery_Aorta	2.58055e-19	0.0007694	-0.671852	0.0705908	-0.0239	0.0071	SAME	0.117981	0.0385929	FALSE	TRUE
Cross-ancestry	autoGCC_q10	chr14:59270382:G:A	chr14:59336116:C:T	a	g	14:59336116	0.949519	-0.0518	0.4847	2.91e-08	59164061	59497831	333.77	404	sQTL	chr14_59480956_G_T_b38	t	chr14_59480956_G_T_b38	ENSG00000050130.17	JKAMP	chr14:59484593:59486681:clu_19992:ENSG00000050130.17	Artery_Aorta	5.08133e-12	0.0005989	0.4847	0.0678657	0.0243	0.0071	SAME	0.0722251	0.0331451	FALSE	TRUE
Cross-ancestry	autoGCC_q10	chr14:59270382:G:A	chr14:59336116:C:T	a	g	14:59336116	0.949519	-0.0518	0.414521	2.91e-08	59164061	59497831	333.77	404	sQTL	chr14_59480956_G_T_b38	t	chr14_59480956_G_T_b38	ENSG00000126790.11	L3HYPDH	chr14:59473090:59474439:clu_19985:ENSG00000126790.11	Artery_Aorta	2.10436e-12	0.0005989	-0.414521	0.056945	0.0243	0.0071	OPPOSITE	0.111416	0.0491475	FALSE	TRUE
Cross-ancestry	autoGCC_q10	chr14:59270382:G:A	chr14:59336116:C:T	a	g	14:59336116	0.949519	-0.0518	0.504149	2.91e-08	59164061	59497831	333.77	404	sQTL	chr14_59497043_G_A_b38	a	chr14_59497043_G_A_b38	ENSG00000050130.17	JKAMP	chr14:59484593:59486681:clu_19992:ENSG00000050130.17	Artery_Aorta	8.66309e-13	0.000683	0.504149	0.0679839	0.0241	0.0071	SAME	0.163012	0.0748086	FALSE	TRUE
Cross-ancestry	autoGCC_q10	chr14:59270382:G:A	chr14:59336116:C:T	a	g	14:59336116	0.949519	-0.0518	0.415915	2.91e-08	59164061	59497831	333.77	404	sQTL	chr14_59497043_G_A_b38	a	chr14_59497043_G_A_b38	ENSG00000126790.11	L3HYPDH	chr14:59473090:59474439:clu_19985:ENSG00000126790.11	Artery_Aorta	2.49688e-12	0.000683	-0.415915	0.0573452	0.0241	0.0071	OPPOSITE	0.134808	0.0594662	FALSE	TRUE
Cross-ancestry	autoGCC_q10	chr14:59270382:G:A	chr14:59336116:C:T	a	g	14:59336116	0.949519	-0.0518	0.504149	2.91e-08	59164061	59497831	333.77	404	sQTL	chr14_59496490_G_C_b38	c	chr14_59496490_G_C_b38	ENSG00000050130.17	JKAMP	chr14:59484593:59486681:clu_19992:ENSG00000050130.17	Artery_Aorta	8.66309e-13	0.0006914	0.504149	0.0679839	0.024	0.0071	SAME	0.138579	0.0635957	FALSE	TRUE
Cross-ancestry	autoGCC_q10	chr14:59270382:G:A	chr14:59336116:C:T	a	g	14:59336116	0.949519	-0.0518	0.415915	2.91e-08	59164061	59497831	333.77	404	sQTL	chr14_59496490_G_C_b38	c	chr14_59496490_G_C_b38	ENSG00000126790.11	L3HYPDH	chr14:59473090:59474439:clu_19985:ENSG00000126790.11	Artery_Aorta	2.49688e-12	0.0006914	-0.415915	0.0573452	0.024	0.0071	OPPOSITE	0.114602	0.0505529	FALSE	TRUE
Cross-ancestry	autoGCC_q10	chr14:59270382:G:A	chr14:59336116:C:T	a	g	14:59336116	0.949519	-0.0518	0.702605	2.91e-08	59164061	59497831	333.77	404	sQTL	chr14_59478818_A_G_b38	a	chr14_59478818_A_G_b38	ENSG00000181619.11	GPR135	chr14:59455760:59456438:clu_19983:ENSG00000181619.11	Artery_Aorta	6.90055e-21	0.001195	-0.702605	0.0703884	-0.0229	0.0071	SAME	0.0368614	0.0120578	FALSE	TRUE
Cross-ancestry	autoGCC_q10	chr14:59270382:G:A	chr14:59336116:C:T	a	g	14:59336116	0.949519	-0.0518	0.459937	2.91e-08	59164061	59497831	333.77	404	sQTL	chr14_59480790_A_C_b38	a	chr14_59480790_A_C_b38	ENSG00000126790.11	L3HYPDH	chr14:59461173:59475869:clu_20757:ENSG00000126790.11	Artery_Tibial	3.19687e-18	0.0007584	0.459937	0.0510364	-0.0239	0.0071	OPPOSITE	0.52486	0.233758	FALSE	TRUE
Cross-ancestry	autoGCC_q10	chr14:59270382:G:A	chr14:59336116:C:T	a	g	14:59336116	0.949519	-0.0518	0.393162	2.91e-08	59164061	59497831	333.77	404	sQTL	chr14_59480790_A_C_b38	a	chr14_59480790_A_C_b38	ENSG00000050130.17	JKAMP	chr14:59484593:59486681:clu_20765:ENSG00000050130.17	Artery_Tibial	8.38554e-13	0.0007584	0.393162	0.0536735	-0.0239	0.0071	OPPOSITE	0.434737	0.210386	FALSE	TRUE
Cross-ancestry	autoGCC_q10	chr14:59270382:G:A	chr14:59336116:C:T	a	g	14:59336116	0.949519	-0.0518	0.297583	2.91e-08	59164061	59497831	333.77	404	sQTL	chr14_59480790_A_C_b38	a	chr14_59480790_A_C_b38	ENSG00000139970.16	RTN1	chr14:59607492:59630446:clu_20772:ENSG00000139970.16	Artery_Tibial	1.12522e-07	0.0007584	-0.297583	0.0553623	-0.0239	0.0071	SAME	0.21039	0.0964484	FALSE	TRUE
Cross-ancestry	autoGCC_q10	chr14:59270382:G:A	chr14:59336116:C:T	a	g	14:59336116	0.949519	-0.0518	0.459937	2.91e-08	59164061	59497831	333.77	404	sQTL	chr14_59476235_T_TCAAC_b38	t	chr14_59476235_T_TCAAC_b38	ENSG00000126790.11	L3HYPDH	chr14:59461173:59475869:clu_20757:ENSG00000126790.11	Artery_Tibial	3.19687e-18	0.0007694	0.459937	0.0510364	-0.0239	0.0071	OPPOSITE	0.159408	0.0709959	FALSE	TRUE
Cross-ancestry	autoGCC_q10	chr14:59270382:G:A	chr14:59336116:C:T	a	g	14:59336116	0.949519	-0.0518	0.393162	2.91e-08	59164061	59497831	333.77	404	sQTL	chr14_59476235_T_TCAAC_b38	t	chr14_59476235_T_TCAAC_b38	ENSG00000050130.17	JKAMP	chr14:59484593:59486681:clu_20765:ENSG00000050130.17	Artery_Tibial	8.38554e-13	0.0007694	0.393162	0.0536735	-0.0239	0.0071	OPPOSITE	0.189774	0.091839	FALSE	TRUE
Cross-ancestry	autoGCC_q10	chr14:59270382:G:A	chr14:59336116:C:T	a	g	14:59336116	0.949519	-0.0518	0.297583	2.91e-08	59164061	59497831	333.77	404	sQTL	chr14_59476235_T_TCAAC_b38	t	chr14_59476235_T_TCAAC_b38	ENSG00000139970.16	RTN1	chr14:59607492:59630446:clu_20772:ENSG00000139970.16	Artery_Tibial	1.12522e-07	0.0007694	-0.297583	0.0553623	-0.0239	0.0071	SAME	0.133222	0.0610726	FALSE	TRUE
Cross-ancestry	autoGCC_q10	chr14:59270382:G:A	chr14:59336116:C:T	a	g	14:59336116	0.949519	-0.0518	0.304215	2.91e-08	59164061	59497831	333.77	404	sQTL	chr14_59480956_G_T_b38	t	chr14_59480956_G_T_b38	ENSG00000139970.16	RTN1	chr14:59607492:59630446:clu_20772:ENSG00000139970.16	Artery_Tibial	7.19434e-08	0.0005989	-0.304215	0.0557233	0.0243	0.0071	OPPOSITE	0.405498	0.185891	FALSE	TRUE
Cross-ancestry	autoGCC_q10	chr14:59270382:G:A	chr14:59336116:C:T	a	g	14:59336116	0.949519	-0.0518	0.464709	2.91e-08	59164061	59497831	333.77	404	sQTL	chr14_59497043_G_A_b38	a	chr14_59497043_G_A_b38	ENSG00000126790.11	L3HYPDH	chr14:59461173:59475869:clu_20757:ENSG00000126790.11	Artery_Tibial	2.07678e-18	0.000683	0.464709	0.0512584	0.0241	0.0071	SAME	0.161991	0.0721462	FALSE	TRUE
Cross-ancestry	autoGCC_q10	chr14:59270382:G:A	chr14:59336116:C:T	a	g	14:59336116	0.949519	-0.0518	0.399147	2.91e-08	59164061	59497831	333.77	404	sQTL	chr14_59497043_G_A_b38	a	chr14_59497043_G_A_b38	ENSG00000050130.17	JKAMP	chr14:59484593:59486681:clu_20765:ENSG00000050130.17	Artery_Tibial	4.8264e-13	0.000683	0.399147	0.0538958	0.0241	0.0071	SAME	0.0250266	0.0121113	FALSE	TRUE
Cross-ancestry	autoGCC_q10	chr14:59270382:G:A	chr14:59336116:C:T	a	g	14:59336116	0.949519	-0.0518	0.288091	2.91e-08	59164061	59497831	333.77	404	sQTL	chr14_59497043_G_A_b38	a	chr14_59497043_G_A_b38	ENSG00000139970.16	RTN1	chr14:59607492:59630446:clu_20772:ENSG00000139970.16	Artery_Tibial	3.30533e-07	0.000683	-0.288091	0.0557495	0.0241	0.0071	OPPOSITE	0.0426512	0.0195524	FALSE	TRUE
Cross-ancestry	autoGCC_q10	chr14:59270382:G:A	chr14:59336116:C:T	a	g	14:59336116	0.949519	-0.0518	0.464709	2.91e-08	59164061	59497831	333.77	404	sQTL	chr14_59496490_G_C_b38	c	chr14_59496490_G_C_b38	ENSG00000126790.11	L3HYPDH	chr14:59461173:59475869:clu_20757:ENSG00000126790.11	Artery_Tibial	2.07678e-18	0.0006914	0.464709	0.0512584	0.024	0.0071	SAME	0.13771	0.0613324	FALSE	TRUE
Cross-ancestry	autoGCC_q10	chr14:59270382:G:A	chr14:59336116:C:T	a	g	14:59336116	0.949519	-0.0518	0.399147	2.91e-08	59164061	59497831	333.77	404	sQTL	chr14_59496490_G_C_b38	c	chr14_59496490_G_C_b38	ENSG00000050130.17	JKAMP	chr14:59484593:59486681:clu_20765:ENSG00000050130.17	Artery_Tibial	4.8264e-13	0.0006914	0.399147	0.0538958	0.024	0.0071	SAME	0.0212754	0.010296	FALSE	TRUE
Cross-ancestry	autoGCC_q10	chr14:59270382:G:A	chr14:59336116:C:T	a	g	14:59336116	0.949519	-0.0518	0.288091	2.91e-08	59164061	59497831	333.77	404	sQTL	chr14_59496490_G_C_b38	c	chr14_59496490_G_C_b38	ENSG00000139970.16	RTN1	chr14:59607492:59630446:clu_20772:ENSG00000139970.16	Artery_Tibial	3.30533e-07	0.0006914	-0.288091	0.0557495	0.024	0.0071	OPPOSITE	0.0362583	0.0166217	FALSE	TRUE
Cross-ancestry	autoGCC_q10	chr14:59270382:G:A	chr14:59336116:C:T	a	g	14:59336116	0.949519	-0.0518	0.405735	2.91e-08	59164061	59497831	333.77	404	sQTL	chr14_59489880_CTCTT_C_b38	ctctt	chr14_59489880_CTCTT_C_b38	ENSG00000050130.17	JKAMP	chr14:59484593:59486681:clu_20765:ENSG00000050130.17	Artery_Tibial	1.82953e-13	0.0006162	0.405735	0.0537666	-0.0242	0.0071	OPPOSITE	0.181724	0.0879433	FALSE	TRUE
Cross-ancestry	autoGCC_q10	chr14:59270382:G:A	chr14:59336116:C:T	a	g	14:59336116	0.949519	-0.0518	0.293859	2.91e-08	59164061	59497831	333.77	404	sQTL	chr14_59489880_CTCTT_C_b38	ctctt	chr14_59489880_CTCTT_C_b38	ENSG00000139970.16	RTN1	chr14:59607492:59630446:clu_20772:ENSG00000139970.16	Artery_Tibial	1.85242e-07	0.0006162	-0.293859	0.0556551	-0.0242	0.0071	SAME	0.135786	0.0622478	FALSE	TRUE
Cross-ancestry	autoGCC_q10	chr14:59270382:G:A	chr14:59336116:C:T	a	g	14:59336116	0.949519	-0.0518	0.41174	2.91e-08	59164061	59497831	333.77	404	sQTL	chr14_59487263_C_T_b38	t	chr14_59487263_C_T_b38	ENSG00000050130.17	JKAMP	chr14:59484593:59486681:clu_20765:ENSG00000050130.17	Artery_Tibial	9.10082e-14	0.0003059	0.41174	0.0538506	0.0256	0.0071	SAME	0.14311	0.0692563	FALSE	TRUE
Cross-ancestry	autoGCC_q10	chr14:59270382:G:A	chr14:59336116:C:T	a	g	14:59336116	0.949519	-0.0518	0.292258	2.91e-08	59164061	59497831	333.77	404	sQTL	chr14_59487263_C_T_b38	t	chr14_59487263_C_T_b38	ENSG00000139970.16	RTN1	chr14:59607492:59630446:clu_20772:ENSG00000139970.16	Artery_Tibial	2.34505e-07	0.0003059	-0.292258	0.0558334	0.0256	0.0071	OPPOSITE	0.0301142	0.0138051	FALSE	TRUE
Cross-ancestry	autoGCC_q10	chr14:59270382:G:A	chr14:59336116:C:T	a	g	14:59336116	0.949519	-0.0518	0.551298	2.91e-08	59164061	59497831	333.77	404	sQTL	chr14_59480790_A_C_b38	a	chr14_59480790_A_C_b38	ENSG00000050130.17	JKAMP	chr14:59484593:59486681:clu_18002:ENSG00000050130.17	Cells_Cultured_fibroblasts	7.1916e-20	0.0007584	0.551298	0.05766	-0.0239	0.0071	OPPOSITE	0.545112	0.240974	FALSE	TRUE
Cross-ancestry	autoGCC_q10	chr14:59270382:G:A	chr14:59336116:C:T	a	g	14:59336116	0.949519	-0.0518	0.393594	2.91e-08	59164061	59497831	333.77	404	sQTL	chr14_59480790_A_C_b38	a	chr14_59480790_A_C_b38	ENSG00000126790.11	L3HYPDH	chr14:59473090:59475869:clu_18000:ENSG00000126790.11	Cells_Cultured_fibroblasts	3.6076e-19	0.0007584	0.393594	0.0420525	-0.0239	0.0071	OPPOSITE	0.468393	0.201227	FALSE	TRUE
Cross-ancestry	autoGCC_q10	chr14:59270382:G:A	chr14:59336116:C:T	a	g	14:59336116	0.949519	-0.0518	0.551298	2.91e-08	59164061	59497831	333.77	404	sQTL	chr14_59476235_T_TCAAC_b38	t	chr14_59476235_T_TCAAC_b38	ENSG00000050130.17	JKAMP	chr14:59484593:59486681:clu_18002:ENSG00000050130.17	Cells_Cultured_fibroblasts	7.1916e-20	0.0007694	0.551298	0.05766	-0.0239	0.0071	OPPOSITE	0.148442	0.0656209	FALSE	TRUE
Cross-ancestry	autoGCC_q10	chr14:59270382:G:A	chr14:59336116:C:T	a	g	14:59336116	0.949519	-0.0518	0.393594	2.91e-08	59164061	59497831	333.77	404	sQTL	chr14_59476235_T_TCAAC_b38	t	chr14_59476235_T_TCAAC_b38	ENSG00000126790.11	L3HYPDH	chr14:59473090:59475869:clu_18000:ENSG00000126790.11	Cells_Cultured_fibroblasts	3.6076e-19	0.0007694	0.393594	0.0420525	-0.0239	0.0071	OPPOSITE	0.167279	0.0718649	FALSE	TRUE
Cross-ancestry	autoGCC_q10	chr14:59270382:G:A	chr14:59336116:C:T	a	g	14:59336116	0.949519	-0.0518	0.397821	2.91e-08	59164061	59497831	333.77	404	sQTL	chr14_59480956_G_T_b38	t	chr14_59480956_G_T_b38	ENSG00000126790.11	L3HYPDH	chr14:59473090:59475869:clu_18000:ENSG00000126790.11	Cells_Cultured_fibroblasts	2.428e-19	0.0005989	0.397821	0.0422793	0.0243	0.0071	SAME	0.0965206	0.0414664	FALSE	TRUE
Cross-ancestry	autoGCC_q10	chr14:59270382:G:A	chr14:59336116:C:T	a	g	14:59336116	0.949519	-0.0518	0.549517	2.91e-08	59164061	59497831	333.77	404	sQTL	chr14_59497043_G_A_b38	a	chr14_59497043_G_A_b38	ENSG00000050130.17	JKAMP	chr14:59484593:59486681:clu_18002:ENSG00000050130.17	Cells_Cultured_fibroblasts	6.42339e-20	0.000683	0.549517	0.0573895	0.0241	0.0071	SAME	0.12551	0.0554836	FALSE	TRUE
Cross-ancestry	autoGCC_q10	chr14:59270382:G:A	chr14:59336116:C:T	a	g	14:59336116	0.949519	-0.0518	0.393578	2.91e-08	59164061	59497831	333.77	404	sQTL	chr14_59497043_G_A_b38	a	chr14_59497043_G_A_b38	ENSG00000126790.11	L3HYPDH	chr14:59473090:59475869:clu_18000:ENSG00000126790.11	Cells_Cultured_fibroblasts	2.43447e-19	0.000683	0.393578	0.0418299	0.0241	0.0071	SAME	0.141513	0.0607958	FALSE	TRUE
Cross-ancestry	autoGCC_q10	chr14:59270382:G:A	chr14:59336116:C:T	a	g	14:59336116	0.949519	-0.0518	0.549517	2.91e-08	59164061	59497831	333.77	404	sQTL	chr14_59496490_G_C_b38	c	chr14_59496490_G_C_b38	ENSG00000050130.17	JKAMP	chr14:59484593:59486681:clu_18002:ENSG00000050130.17	Cells_Cultured_fibroblasts	6.42339e-20	0.0006914	0.549517	0.0573895	0.024	0.0071	SAME	0.106698	0.0471672	FALSE	TRUE
Cross-ancestry	autoGCC_q10	chr14:59270382:G:A	chr14:59336116:C:T	a	g	14:59336116	0.949519	-0.0518	0.393578	2.91e-08	59164061	59497831	333.77	404	sQTL	chr14_59496490_G_C_b38	c	chr14_59496490_G_C_b38	ENSG00000126790.11	L3HYPDH	chr14:59473090:59475869:clu_18000:ENSG00000126790.11	Cells_Cultured_fibroblasts	2.43447e-19	0.0006914	0.393578	0.0418299	0.024	0.0071	SAME	0.120302	0.0516833	FALSE	TRUE
Cross-ancestry	autoGCC_q10	chr14:59270382:G:A	chr14:59336116:C:T	a	g	14:59336116	0.949519	-0.0518	0.551042	2.91e-08	59164061	59497831	333.77	404	sQTL	chr14_59489880_CTCTT_C_b38	ctctt	chr14_59489880_CTCTT_C_b38	ENSG00000050130.17	JKAMP	chr14:59484593:59486681:clu_18002:ENSG00000050130.17	Cells_Cultured_fibroblasts	3.99074e-20	0.0006162	0.551042	0.0571969	-0.0242	0.0071	OPPOSITE	0.0691147	0.0305531	FALSE	TRUE
Cross-ancestry	mocoRNFL_q5	chr10:68212053:TAG:T	chr10:68212011:A:G	t	tag	10:68212011	0.944972	-0.0566	0.409621	2.061e-09	67947672	68343078	395.406	461	eQTL	chr10_68232096_A_G_b38	a	chr10_68232096_A_G_b38	ENSG00000179774.8	ATOH7		Brain_Cerebellum	2.15058e-06	2.803e-08	0.409621	0.0834555	0.0459	0.0083	SAME	0.459588	0.0154437	TRUE	TRUE
Cross-ancestry	mocoRNFL_q5	chr10:68212053:TAG:T	chr10:68212011:A:G	t	tag	10:68212011	0.944972	-0.0566	0.252381	2.061e-09	67947672	68343078	395.406	461	eQTL	chr10_68212053_TAG_T_b38	t	chr10_68212053_TAG_T_b38	ENSG00000108176.14	DNAJC12		Brain_Cerebellum	9.11984e-05	2.061e-09	-0.252381	0.062948	-0.0566	0.0094	SAME	0.249778	0.0158649	TRUE	TRUE
Cross-ancestry	mocoRNFL_q5	chr10:68212053:TAG:T	chr10:68212011:A:G	t	tag	10:68212011	0.944972	-0.0566	0.507797	2.061e-09	67947672	68343078	395.406	461	eQTL	chr10_68281826_C_T_b38	t	chr10_68281826_C_T_b38	ENSG00000108187.15	PBLD		Brain_Putamen_basal_ganglia	7.36559e-18	1.883e-08	-0.507797	0.0506823	-0.0465	0.0083	SAME	0.41428	0.0100986	TRUE	TRUE
Cross-ancestry	mocoRNFL_q5	chr10:68212053:TAG:T	chr10:68212011:A:G	t	tag	10:68212011	0.944972	-0.0566	0.325683	2.061e-09	67947672	68343078	395.406	461	eQTL	chr10_68281826_C_T_b38	t	chr10_68281826_C_T_b38	ENSG00000108187.15	PBLD		Artery_Aorta	2.87821e-18	1.883e-08	-0.325683	0.0351199	-0.0465	0.0083	SAME	0.437296	0.0106028	TRUE	TRUE
Cross-ancestry	mocoRNFL_q5	chr10:68212053:TAG:T	chr10:68212011:A:G	t	tag	10:68212011	0.944972	-0.0566	0.304738	2.061e-09	67947672	68343078	395.406	461	eQTL	chr10_68212053_TAG_T_b38	t	chr10_68212053_TAG_T_b38	ENSG00000179774.8	ATOH7		Cells_Cultured_fibroblasts	4.20621e-05	2.061e-09	0.304738	0.0736021	-0.0566	0.0094	OPPOSITE	0.262683	0.0167674	TRUE	TRUE
Cross-ancestry	mocoRNFL_q5	chr10:68212053:TAG:T	chr10:68212011:A:G	t	tag	10:68212011	0.944972	-0.0566	0.306192	2.061e-09	67947672	68343078	395.406	461	eQTL	chr10_68215276_C_T_b38	t	chr10_68215276_C_T_b38	ENSG00000179774.8	ATOH7		Cells_Cultured_fibroblasts	5.00847e-05	1.267e-08	-0.306192	0.0747091	-0.0538	0.0095	SAME	0.167538	0.0106942	TRUE	TRUE
Cross-ancestry	mocoRNFL_q5	chr10:68212053:TAG:T	chr10:68212011:A:G	t	tag	10:68212011	0.944972	-0.0566	0.459313	2.061e-09	67947672	68343078	395.406	459	eQTL	chr10_68284945_A_G_b38	a	chr10_68284945_A_G_b38	ENSG00000108187.15	PBLD		Brain_Amygdala	1.8199e-09	3.254e-08	-0.459313	0.0696577	0.0456	0.0082	OPPOSITE	0.350237	0.0102699	TRUE	TRUE
Cross-ancestry	mocoRNFL_q5	chr10:68212053:TAG:T	chr10:68212011:A:G	t	tag	10:68212011	0.944972	-0.0566	0.423767	2.061e-09	67947672	68343078	395.406	461	eQTL	chr10_68281826_C_T_b38	t	chr10_68281826_C_T_b38	ENSG00000179774.8	ATOH7		Artery_Tibial	2.28763e-20	1.883e-08	0.423767	0.0439074	-0.0465	0.0083	OPPOSITE	0.454014	0.0111638	TRUE	TRUE
Cross-ancestry	mocoRNFL_q5	chr10:68212053:TAG:T	chr10:68212011:A:G	t	tag	10:68212011	0.944972	-0.0566	0.423767	2.061e-09	67947672	68343078	395.406	461	eQTL	chr10_68280354_A_G_b38	a	chr10_68280354_A_G_b38	ENSG00000179774.8	ATOH7		Artery_Tibial	2.28763e-20	2.091e-08	0.423767	0.0439074	0.0463	0.0083	SAME	0.410296	0.0100888	TRUE	TRUE
Cross-ancestry	mocoRNFL_q5	chr10:68212053:TAG:T	chr10:68212011:A:G	t	tag	10:68212011	0.944972	-0.0566	0.335485	2.061e-09	67947672	68343078	395.406	461	eQTL	chr10_68212053_TAG_T_b38	t	chr10_68212053_TAG_T_b38	ENSG00000108187.15	PBLD		Brain_Hippocampus	3.75981e-06	2.061e-09	-0.335485	0.0693208	-0.0566	0.0094	SAME	0.199815	0.0116693	TRUE	TRUE
Cross-ancestry	mocoRNFL_q5	chr14:74199522:T:C	chr14:74126422:A:G	t	c	14:74126422	0.940541	-0.0613	0.178232	4.47e-08	73700162	74706180	1006.02	856	eQTL	chr14_73999038_A_T_b38	a	chr14_73999038_A_T_b38	ENSG00000187097.12	ENTPD5		Brain_Cortex	3.51192e-06	0.000482	0.178232	0.0371207	0.0251	0.0072	SAME	0.745347	0.0115032	TRUE	TRUE
Cross-ancestry	mocoRNFL_q5	chr14:74199522:T:C	chr14:74126422:A:G	t	c	14:74126422	0.940541	-0.0613	0.562555	4.47e-08	73700162	74706180	1006.02	856	sQTL	chr14_73999038_A_T_b38	a	chr14_73999038_A_T_b38	ENSG00000119723.16	COQ6	chr14:73961570:73961737:clu_15994:ENSG00000119723.16	Brain_Hippocampus	3.04728e-08	0.000482	-0.562555	0.0958703	0.0251	0.0072	OPPOSITE	0.972293	0.0870931	FALSE	TRUE
Cross-ancestry	mocoGCC_q3	chr10:68281826:C:T	chr10:68282506:A:G	t	c	10:68282506	0.945634	-0.0559	0.509245	1.691e-11	68156426	68422247	265.821	926	eQTL	chr10_68284945_A_G_b38	a	chr10_68284945_A_G_b38	ENSG00000108187.15	PBLD		Brain_Putamen_basal_ganglia	4.26406e-18	3.767e-11	-0.509245	0.0503459	0.0549	0.0083	OPPOSITE	0.317393	0.0191347	TRUE	TRUE
Cross-ancestry	mocoGCC_q3	chr10:68281826:C:T	chr10:68282506:A:G	t	c	10:68282506	0.945634	-0.0559	0.507797	1.691e-11	68156426	68422247	265.821	926	eQTL	chr10_68280354_A_G_b38	a	chr10_68280354_A_G_b38	ENSG00000108187.15	PBLD		Brain_Putamen_basal_ganglia	7.36559e-18	1.764e-11	-0.507797	0.0506823	0.0559	0.0083	OPPOSITE	0.280001	0.0168805	TRUE	TRUE
Cross-ancestry	mocoGCC_q3	chr10:68281826:C:T	chr10:68282506:A:G	t	c	10:68282506	0.945634	-0.0559	0.507797	1.691e-11	68156426	68422247	265.821	926	eQTL	chr10_68281826_C_T_b38	t	chr10_68281826_C_T_b38	ENSG00000108187.15	PBLD		Brain_Putamen_basal_ganglia	7.36559e-18	1.691e-11	-0.507797	0.0506823	-0.0559	0.0083	SAME	0.280001	0.0168805	TRUE	TRUE
Cross-ancestry	mocoGCC_q3	chr10:68281826:C:T	chr10:68282506:A:G	t	c	10:68282506	0.945634	-0.0559	0.459313	1.691e-11	68156426	68422247	265.821	926	eQTL	chr10_68284945_A_G_b38	a	chr10_68284945_A_G_b38	ENSG00000108187.15	PBLD		Brain_Amygdala	1.8199e-09	3.767e-11	-0.459313	0.0696577	0.0549	0.0083	OPPOSITE	0.504014	0.0148083	TRUE	TRUE
Cross-ancestry	mocoGCC_q3	chr10:68281826:C:T	chr10:68282506:A:G	t	c	10:68282506	0.945634	-0.0559	0.305169	1.691e-11	68156426	68422247	265.821	926	eQTL	chr10_68242636_A_T_b38	a	chr10_68242636_A_T_b38	ENSG00000179774.8	ATOH7		Brain_Cerebellar_Hemisphere	3.26365e-05	3.275e-11	-0.305169	0.0709861	0.0552	0.0083	OPPOSITE	0.208084	0.0188773	TRUE	TRUE
Cross-ancestry	mocoGCC_q3	chr10:68281826:C:T	chr10:68282506:A:G	t	c	10:68282506	0.945634	-0.0559	0.305169	1.691e-11	68156426	68422247	265.821	926	eQTL	chr10_68240536_A_G_b38	a	chr10_68240536_A_G_b38	ENSG00000179774.8	ATOH7		Brain_Cerebellar_Hemisphere	3.26365e-05	3.649e-11	-0.305169	0.0709861	0.0551	0.0083	OPPOSITE	0.199977	0.0181419	TRUE	TRUE
Cross-ancestry	mocoGCC_q3	chr10:68281826:C:T	chr10:68282506:A:G	t	c	10:68282506	0.945634	-0.0559	0.305169	1.691e-11	68156426	68422247	265.821	926	eQTL	chr10_68241124_C_T_b38	t	chr10_68241124_C_T_b38	ENSG00000179774.8	ATOH7		Brain_Cerebellar_Hemisphere	3.26365e-05	4.074e-11	-0.305169	0.0709861	-0.0549	0.0083	SAME	0.18477	0.0167623	TRUE	TRUE
Cross-ancestry	mocoGCC_q3	chr10:68281826:C:T	chr10:68282506:A:G	t	c	10:68282506	0.945634	-0.0559	0.338581	1.691e-11	68156426	68422247	265.821	926	eQTL	chr10_68232096_A_G_b38	a	chr10_68232096_A_G_b38	ENSG00000179774.8	ATOH7		Brain_Cerebellar_Hemisphere	3.99968e-06	2.199e-10	0.338581	0.0704117	0.0527	0.0083	SAME	0.112409	0.0101977	TRUE	TRUE
Cross-ancestry	mocoGCC_q3	chr10:68281826:C:T	chr10:68282506:A:G	t	c	10:68282506	0.945634	-0.0559	0.380852	1.691e-11	68156426	68422247	265.821	926	eQTL	chr10_68280354_A_G_b38	a	chr10_68280354_A_G_b38	ENSG00000108187.15	PBLD		Brain_Cerebellar_Hemisphere	4.50896e-07	1.764e-11	-0.380852	0.0718009	0.0559	0.0083	OPPOSITE	0.335642	0.010131	TRUE	TRUE
Cross-ancestry	mocoGCC_q3	chr10:68281826:C:T	chr10:68282506:A:G	t	c	10:68282506	0.945634	-0.0559	0.380852	1.691e-11	68156426	68422247	265.821	926	eQTL	chr10_68281826_C_T_b38	t	chr10_68281826_C_T_b38	ENSG00000108187.15	PBLD		Brain_Cerebellar_Hemisphere	4.50896e-07	1.691e-11	-0.380852	0.0718009	-0.0559	0.0083	SAME	0.335642	0.010131	TRUE	TRUE
Cross-ancestry	mocoGCC_q3	chr10:68281826:C:T	chr10:68282506:A:G	t	c	10:68282506	0.945634	-0.0559	0.340009	1.691e-11	68156426	68422247	265.821	926	eQTL	chr10_68284945_A_G_b38	a	chr10_68284945_A_G_b38	ENSG00000233590.1	RP11-153K11.3		Artery_Tibial	3.14715e-12	3.767e-11	0.340009	0.0476025	0.0549	0.0083	SAME	0.326509	0.0115642	TRUE	TRUE
Cross-ancestry	autoRNFL_q3	chr10:68261045:G:A	chr10:68261100:C:G	a	g	10:68261100	0.932394	-0.07	0.507797	3.501e-18	67736409	68416974	680.565	726	eQTL	chr10_68280354_A_G_b38	a	chr10_68280354_A_G_b38	ENSG00000108187.15	PBLD		Brain_Putamen_basal_ganglia	7.36559e-18	6.71e-18	-0.507797	0.0506823	0.0712	0.0083	OPPOSITE	0.397027	0.0101401	TRUE	TRUE
Cross-ancestry	autoRNFL_q3	chr10:68261045:G:A	chr10:68261100:C:G	a	g	10:68261100	0.932394	-0.07	0.423767	3.501e-18	67736409	68416974	680.565	726	eQTL	chr10_68280354_A_G_b38	a	chr10_68280354_A_G_b38	ENSG00000179774.8	ATOH7		Artery_Tibial	2.28763e-20	6.71e-18	0.423767	0.0439074	0.0712	0.0083	SAME	0.453147	0.0131477	TRUE	TRUE
Cross-ancestry	autoRNFL_q3	chr10:68261045:G:A	chr10:68261100:C:G	a	g	10:68261100	0.932394	-0.07	0.423767	3.501e-18	67736409	68416974	680.565	726	eQTL	chr10_68281826_C_T_b38	t	chr10_68281826_C_T_b38	ENSG00000179774.8	ATOH7		Artery_Tibial	2.28763e-20	7.814e-18	0.423767	0.0439074	-0.0711	0.0083	OPPOSITE	0.413594	0.0120001	TRUE	TRUE
Cross-ancestry	autoRNFL_q3	chr8:108279863:C:T	chr8:108279912:A:G	t	c	8:108279912	0.953515	-0.0476	0.621252	7.242e-09	108136563	108441555	304.992	997	sQTL	chr8_108257052_C_T_b38	t	chr8_108257052_C_T_b38	ENSG00000104408.9	EIF3E	chr8:108233672:108234998:clu_41561:ENSG00000104408.9	Brain_Spinal_cord_cervical_c-1	1.1883e-08	0.0135	0.621252	0.100042	0.0177	0.0072	SAME	0.212345	0.011146	FALSE	TRUE
Cross-ancestry	autoRNFL_q3	chr8:108279863:C:T	chr8:108279912:A:G	t	c	8:108279912	0.953515	-0.0476	0.621252	7.242e-09	108136563	108441555	304.992	997	sQTL	chr8_108259777_T_C_b38	t	chr8_108259777_T_C_b38	ENSG00000104408.9	EIF3E	chr8:108233672:108234998:clu_41561:ENSG00000104408.9	Brain_Spinal_cord_cervical_c-1	1.1883e-08	0.01372	0.621252	0.100042	-0.0177	0.0072	OPPOSITE	0.212345	0.011146	FALSE	TRUE
Cross-ancestry	autoRNFL_q3	chr8:108279863:C:T	chr8:108279912:A:G	t	c	8:108279912	0.953515	-0.0476	0.621252	7.242e-09	108136563	108441555	304.992	997	sQTL	chr8_108260956_G_A_b38	a	chr8_108260956_G_A_b38	ENSG00000104408.9	EIF3E	chr8:108233672:108234998:clu_41561:ENSG00000104408.9	Brain_Spinal_cord_cervical_c-1	1.1883e-08	0.01401	0.621252	0.100042	0.0176	0.0072	SAME	0.202765	0.0106431	FALSE	TRUE
Cross-ancestry	autoRNFL_q3	chr8:108279863:C:T	chr8:108279912:A:G	t	c	8:108279912	0.953515	-0.0476	0.554784	7.242e-09	108136563	108441555	304.992	997	sQTL	chr8_108242977_C_T_b38	t	chr8_108242977_C_T_b38	ENSG00000104408.9	EIF3E	chr8:108229195:108234998:clu_47884:ENSG00000104408.9	Brain_Caudate_basal_ganglia	4.2652e-08	0.01158	-0.554784	0.0966311	0.0181	0.0072	OPPOSITE	0.204905	0.0154286	FALSE	TRUE
Cross-ancestry	autoRNFL_q3	chr8:108279863:C:T	chr8:108279912:A:G	t	c	8:108279912	0.953515	-0.0476	0.554784	7.242e-09	108136563	108441555	304.992	997	sQTL	chr8_108239461_C_G_b38	c	chr8_108239461_C_G_b38	ENSG00000104408.9	EIF3E	chr8:108229195:108234998:clu_47884:ENSG00000104408.9	Brain_Caudate_basal_ganglia	4.2652e-08	0.01168	-0.554784	0.0966311	-0.0181	0.0072	SAME	0.204905	0.0154286	FALSE	TRUE
Cross-ancestry	autoRNFL_q3	chr8:108279863:C:T	chr8:108279912:A:G	t	c	8:108279912	0.953515	-0.0476	0.554784	7.242e-09	108136563	108441555	304.992	997	sQTL	chr8_108243503_C_T_b38	t	chr8_108243503_C_T_b38	ENSG00000104408.9	EIF3E	chr8:108229195:108234998:clu_47884:ENSG00000104408.9	Brain_Caudate_basal_ganglia	4.2652e-08	0.01196	-0.554784	0.0966311	0.018	0.0072	OPPOSITE	0.195042	0.0146859	FALSE	TRUE
Cross-ancestry	autoRNFL_q3	chr8:108279863:C:T	chr8:108279912:A:G	t	c	8:108279912	0.953515	-0.0476	0.554784	7.242e-09	108136563	108441555	304.992	997	sQTL	chr8_108249551_G_T_b38	t	chr8_108249551_G_T_b38	ENSG00000104408.9	EIF3E	chr8:108229195:108234998:clu_47884:ENSG00000104408.9	Brain_Caudate_basal_ganglia	4.2652e-08	0.01148	-0.554784	0.0966311	0.0181	0.0072	OPPOSITE	0.186828	0.0140674	FALSE	TRUE
Cross-ancestry	autoRNFL_q3	chr8:108279863:C:T	chr8:108279912:A:G	t	c	8:108279912	0.953515	-0.0476	0.554784	7.242e-09	108136563	108441555	304.992	997	sQTL	chr8_108250067_T_C_b38	t	chr8_108250067_T_C_b38	ENSG00000104408.9	EIF3E	chr8:108229195:108234998:clu_47884:ENSG00000104408.9	Brain_Caudate_basal_ganglia	4.2652e-08	0.0111	-0.554784	0.0966311	-0.0182	0.0072	SAME	0.174301	0.0131242	FALSE	TRUE
Cross-ancestry	autoRNFL_q3	chr8:108279863:C:T	chr8:108279912:A:G	t	c	8:108279912	0.953515	-0.0476	0.706221	7.242e-09	108136563	108441555	304.992	997	sQTL	chr8_108242977_C_T_b38	t	chr8_108242977_C_T_b38	ENSG00000104408.9	EIF3E	chr8:108233672:108234998:clu_55068:ENSG00000104408.9	Artery_Aorta	1.76216e-35	0.01158	0.706221	0.0508232	0.0181	0.0072	SAME	0.253631	0.0199158	FALSE	TRUE
Cross-ancestry	autoRNFL_q3	chr8:108279863:C:T	chr8:108279912:A:G	t	c	8:108279912	0.953515	-0.0476	0.706221	7.242e-09	108136563	108441555	304.992	997	sQTL	chr8_108239461_C_G_b38	c	chr8_108239461_C_G_b38	ENSG00000104408.9	EIF3E	chr8:108233672:108234998:clu_55068:ENSG00000104408.9	Artery_Aorta	1.76216e-35	0.01168	0.706221	0.0508232	-0.0181	0.0072	OPPOSITE	0.253631	0.0199158	FALSE	TRUE
Cross-ancestry	autoRNFL_q3	chr8:108279863:C:T	chr8:108279912:A:G	t	c	8:108279912	0.953515	-0.0476	0.706221	7.242e-09	108136563	108441555	304.992	997	sQTL	chr8_108243503_C_T_b38	t	chr8_108243503_C_T_b38	ENSG00000104408.9	EIF3E	chr8:108233672:108234998:clu_55068:ENSG00000104408.9	Artery_Aorta	1.76216e-35	0.01196	0.706221	0.0508232	0.018	0.0072	SAME	0.241422	0.0189571	FALSE	TRUE
Cross-ancestry	autoRNFL_q3	chr8:108279863:C:T	chr8:108279912:A:G	t	c	8:108279912	0.953515	-0.0476	0.706221	7.242e-09	108136563	108441555	304.992	997	sQTL	chr8_108249551_G_T_b38	t	chr8_108249551_G_T_b38	ENSG00000104408.9	EIF3E	chr8:108233672:108234998:clu_55068:ENSG00000104408.9	Artery_Aorta	1.76216e-35	0.01148	0.706221	0.0508232	0.0181	0.0072	SAME	0.157838	0.0123939	FALSE	TRUE
Cross-ancestry	autoRNFL_q3	chr8:108279863:C:T	chr8:108279912:A:G	t	c	8:108279912	0.953515	-0.0476	0.724113	7.242e-09	108136563	108441555	304.992	996	sQTL	chr8_108257052_C_T_b38	t	chr8_108257052_C_T_b38	ENSG00000104408.9	EIF3E	chr8:108229195:108234998:clu_37439:ENSG00000104408.9	Brain_Substantia_nigra	5.92456e-07	0.0135	-0.724113	0.134552	0.0177	0.0072	OPPOSITE	0.335537	0.0155815	FALSE	TRUE
Cross-ancestry	autoRNFL_q3	chr8:108279863:C:T	chr8:108279912:A:G	t	c	8:108279912	0.953515	-0.0476	0.724113	7.242e-09	108136563	108441555	304.992	996	sQTL	chr8_108259777_T_C_b38	t	chr8_108259777_T_C_b38	ENSG00000104408.9	EIF3E	chr8:108229195:108234998:clu_37439:ENSG00000104408.9	Brain_Substantia_nigra	5.92456e-07	0.01372	-0.724113	0.134552	-0.0177	0.0072	SAME	0.335537	0.0155815	FALSE	TRUE
Cross-ancestry	autoRNFL_q3	chr8:108279863:C:T	chr8:108279912:A:G	t	c	8:108279912	0.953515	-0.0476	0.724113	7.242e-09	108136563	108441555	304.992	996	sQTL	chr8_108260956_G_A_b38	a	chr8_108260956_G_A_b38	ENSG00000104408.9	EIF3E	chr8:108229195:108234998:clu_37439:ENSG00000104408.9	Brain_Substantia_nigra	5.92456e-07	0.01401	-0.724113	0.134552	0.0176	0.0072	OPPOSITE	0.320398	0.0148785	FALSE	TRUE
Cross-ancestry	autoRNFL_q3	chr8:108279863:C:T	chr8:108279912:A:G	t	c	8:108279912	0.953515	-0.0476	0.495942	7.242e-09	108136563	108441555	304.992	997	sQTL	chr8_108257052_C_T_b38	t	chr8_108257052_C_T_b38	ENSG00000104408.9	EIF3E	chr8:108229195:108234998:clu_45838:ENSG00000104408.9	Brain_Frontal_Cortex_BA9	3.85563e-07	0.0135	-0.495942	0.0933728	0.0177	0.0072	OPPOSITE	0.226946	0.0122195	FALSE	TRUE
Cross-ancestry	autoRNFL_q3	chr8:108279863:C:T	chr8:108279912:A:G	t	c	8:108279912	0.953515	-0.0476	0.495942	7.242e-09	108136563	108441555	304.992	997	sQTL	chr8_108259777_T_C_b38	t	chr8_108259777_T_C_b38	ENSG00000104408.9	EIF3E	chr8:108229195:108234998:clu_45838:ENSG00000104408.9	Brain_Frontal_Cortex_BA9	3.85563e-07	0.01372	-0.495942	0.0933728	-0.0177	0.0072	SAME	0.226946	0.0122195	FALSE	TRUE
Cross-ancestry	autoRNFL_q3	chr8:108279863:C:T	chr8:108279912:A:G	t	c	8:108279912	0.953515	-0.0476	0.495942	7.242e-09	108136563	108441555	304.992	997	sQTL	chr8_108260956_G_A_b38	a	chr8_108260956_G_A_b38	ENSG00000104408.9	EIF3E	chr8:108229195:108234998:clu_45838:ENSG00000104408.9	Brain_Frontal_Cortex_BA9	3.85563e-07	0.01401	-0.495942	0.0933728	0.0176	0.0072	OPPOSITE	0.216707	0.0116682	FALSE	TRUE
Cross-ancestry	mocoRNFL_q1	chr10:68254881:T:C	chr10:68254831:A:G	t	c	10:68254831	0.939319	-0.0626	0.381502	4.341e-15	68033346	68563436	530.09	879	eQTL	chr10_68261045_G_A_b38	a	chr10_68261045_G_A_b38	ENSG00000179774.8	ATOH7		Artery_Aorta	2.91814e-08	1.294e-14	0.381502	0.0670683	0.0619	0.008	SAME	0.373251	0.04935	TRUE	TRUE
Cross-ancestry	mocoRNFL_q1	chr10:68254881:T:C	chr10:68254831:A:G	t	c	10:68254831	0.939319	-0.0626	0.376291	4.341e-15	68033346	68563436	530.09	879	eQTL	chr10_68254881_T_C_b38	t	chr10_68254881_T_C_b38	ENSG00000179774.8	ATOH7		Artery_Aorta	4.77917e-08	4.341e-15	-0.376291	0.0672574	-0.0626	0.008	SAME	0.112291	0.0148467	TRUE	TRUE
Cross-ancestry	mocoRNFL_q1	chr10:68254881:T:C	chr10:68254831:A:G	t	c	10:68254831	0.939319	-0.0626	0.376291	4.341e-15	68033346	68563436	530.09	879	eQTL	chr10_68254383_T_C_b38	t	chr10_68254383_T_C_b38	ENSG00000179774.8	ATOH7		Artery_Aorta	4.77917e-08	4.457e-15	-0.376291	0.0672574	-0.0625	0.008	SAME	0.104749	0.0138496	TRUE	TRUE
Cross-ancestry	mocoRNFL_q1	chr10:68254881:T:C	chr10:68254831:A:G	t	c	10:68254831	0.939319	-0.0626	0.386088	4.341e-15	68033346	68563436	530.09	879	eQTL	chr10_68261741_A_G_b38	a	chr10_68261741_A_G_b38	ENSG00000179774.8	ATOH7		Artery_Aorta	2.61114e-08	1.007e-14	-0.386088	0.0676261	-0.062	0.008	SAME	0.214343	0.0283397	TRUE	TRUE
Cross-ancestry	mocoRNFL_q1	chr10:68254881:T:C	chr10:68254831:A:G	t	c	10:68254831	0.939319	-0.0626	0.379046	4.341e-15	68033346	68563436	530.09	879	eQTL	chr10_68252081_A_G_b38	a	chr10_68252081_A_G_b38	ENSG00000179774.8	ATOH7		Artery_Aorta	3.92526e-08	4.574e-15	-0.379046	0.0672996	-0.0624	0.008	SAME	0.124106	0.0164088	TRUE	TRUE
Cross-ancestry	mocoRNFL_q1	chr10:68254881:T:C	chr10:68254831:A:G	t	c	10:68254831	0.939319	-0.0626	0.338581	4.341e-15	68033346	68563436	530.09	879	eQTL	chr10_68232096_A_G_b38	a	chr10_68232096_A_G_b38	ENSG00000179774.8	ATOH7		Brain_Cerebellar_Hemisphere	3.99968e-06	7.316e-13	0.338581	0.0704117	-0.0591	0.0082	OPPOSITE	0.375316	0.0174195	TRUE	TRUE
Cross-ancestry	mocoRNFL_q1	chr10:68254881:T:C	chr10:68254831:A:G	t	c	10:68254831	0.939319	-0.0626	0.337305	4.341e-15	68033346	68563436	530.09	879	eQTL	chr10_68261045_G_A_b38	a	chr10_68261045_G_A_b38	ENSG00000233590.1	RP11-153K11.3		Artery_Tibial	2.18951e-12	1.294e-14	0.337305	0.0468655	0.0619	0.008	SAME	0.355537	0.0328818	TRUE	TRUE
Cross-ancestry	mocoRNFL_q1	chr10:68254881:T:C	chr10:68254831:A:G	t	c	10:68254831	0.939319	-0.0626	0.343614	4.341e-15	68033346	68563436	530.09	879	eQTL	chr10_68254881_T_C_b38	t	chr10_68254881_T_C_b38	ENSG00000233590.1	RP11-153K11.3		Artery_Tibial	6.5475e-13	4.341e-15	-0.343614	0.0465802	-0.0626	0.008	SAME	0.191458	0.0177069	TRUE	TRUE
Cross-ancestry	mocoRNFL_q1	chr10:68254881:T:C	chr10:68254831:A:G	t	c	10:68254831	0.939319	-0.0626	0.343614	4.341e-15	68033346	68563436	530.09	879	eQTL	chr10_68254383_T_C_b38	t	chr10_68254383_T_C_b38	ENSG00000233590.1	RP11-153K11.3		Artery_Tibial	6.5475e-13	4.457e-15	-0.343614	0.0465802	-0.0625	0.008	SAME	0.1786	0.0165178	TRUE	TRUE
Cross-ancestry	autoRNFL_q6	chr10:68261045:G:A	chr10:68261100:C:G	a	g	10:68261100	1.08567	0.0822	0.507797	1.105e-24	67736409	68416974	680.565	827	eQTL	chr10_68280354_A_G_b38	a	chr10_68280354_A_G_b38	ENSG00000108187.15	PBLD		Brain_Putamen_basal_ganglia	7.36559e-18	9.385e-24	-0.507797	0.0506823	-0.0827	0.0082	SAME	0.331316	0.0389881	TRUE	TRUE
Cross-ancestry	autoRNFL_q6	chr10:68261045:G:A	chr10:68261100:C:G	a	g	10:68261100	1.08567	0.0822	0.507797	1.105e-24	67736409	68416974	680.565	827	eQTL	chr10_68281826_C_T_b38	t	chr10_68281826_C_T_b38	ENSG00000108187.15	PBLD		Brain_Putamen_basal_ganglia	7.36559e-18	9.939e-24	-0.507797	0.0506823	0.0827	0.0082	OPPOSITE	0.331316	0.0389881	TRUE	TRUE
Cross-ancestry	autoRNFL_q6	chr10:68261045:G:A	chr10:68261100:C:G	a	g	10:68261100	1.08567	0.0822	0.509245	1.105e-24	67736409	68416974	680.565	827	eQTL	chr10_68284945_A_G_b38	a	chr10_68284945_A_G_b38	ENSG00000108187.15	PBLD		Brain_Putamen_basal_ganglia	4.26406e-18	2.666e-23	-0.509245	0.0503459	-0.0817	0.0082	SAME	0.297091	0.0349605	TRUE	TRUE
Cross-ancestry	autoRNFL_q6	chr10:68261045:G:A	chr10:68261100:C:G	a	g	10:68261100	1.08567	0.0822	0.381502	1.105e-24	67736409	68416974	680.565	827	eQTL	chr10_68261045_G_A_b38	a	chr10_68261045_G_A_b38	ENSG00000179774.8	ATOH7		Artery_Aorta	2.91814e-08	1.105e-24	0.381502	0.0670683	0.0822	0.008	SAME	0.622112	0.0918996	TRUE	TRUE
Cross-ancestry	autoRNFL_q6	chr10:68261045:G:A	chr10:68261100:C:G	a	g	10:68261100	1.08567	0.0822	0.44808	1.105e-24	67736409	68416974	680.565	825	eQTL	chr10_68280354_A_G_b38	a	chr10_68280354_A_G_b38	ENSG00000108187.15	PBLD		Brain_Amygdala	4.78123e-09	9.385e-24	-0.44808	0.0701293	-0.0827	0.0082	SAME	0.250973	0.0146785	TRUE	TRUE
Cross-ancestry	autoRNFL_q6	chr10:68261045:G:A	chr10:68261100:C:G	a	g	10:68261100	1.08567	0.0822	0.44808	1.105e-24	67736409	68416974	680.565	825	eQTL	chr10_68281826_C_T_b38	t	chr10_68281826_C_T_b38	ENSG00000108187.15	PBLD		Brain_Amygdala	4.78123e-09	9.939e-24	-0.44808	0.0701293	0.0827	0.0082	OPPOSITE	0.250973	0.0146785	TRUE	TRUE
Cross-ancestry	autoRNFL_q6	chr10:68261045:G:A	chr10:68261100:C:G	a	g	10:68261100	1.08567	0.0822	0.459313	1.105e-24	67736409	68416974	680.565	825	eQTL	chr10_68284945_A_G_b38	a	chr10_68284945_A_G_b38	ENSG00000108187.15	PBLD		Brain_Amygdala	1.8199e-09	2.666e-23	-0.459313	0.0696577	-0.0817	0.0082	SAME	0.469512	0.0274601	TRUE	TRUE
Cross-ancestry	autoRNFL_q6	chr10:68261045:G:A	chr10:68261100:C:G	a	g	10:68261100	1.08567	0.0822	0.380852	1.105e-24	67736409	68416974	680.565	827	eQTL	chr10_68280354_A_G_b38	a	chr10_68280354_A_G_b38	ENSG00000108187.15	PBLD		Brain_Cerebellar_Hemisphere	4.50896e-07	9.385e-24	-0.380852	0.0718009	-0.0827	0.0082	SAME	0.367872	0.0238579	TRUE	TRUE
Cross-ancestry	autoRNFL_q6	chr10:68261045:G:A	chr10:68261100:C:G	a	g	10:68261100	1.08567	0.0822	0.380852	1.105e-24	67736409	68416974	680.565	827	eQTL	chr10_68281826_C_T_b38	t	chr10_68281826_C_T_b38	ENSG00000108187.15	PBLD		Brain_Cerebellar_Hemisphere	4.50896e-07	9.939e-24	-0.380852	0.0718009	0.0827	0.0082	OPPOSITE	0.367872	0.0238579	TRUE	TRUE
Cross-ancestry	autoRNFL_q6	chr10:68261045:G:A	chr10:68261100:C:G	a	g	10:68261100	1.08567	0.0822	0.386207	1.105e-24	67736409	68416974	680.565	827	eQTL	chr10_68284945_A_G_b38	a	chr10_68284945_A_G_b38	ENSG00000108187.15	PBLD		Brain_Cerebellar_Hemisphere	3.47526e-07	2.666e-23	-0.386207	0.072033	-0.0817	0.0082	SAME	0.252154	0.0163531	TRUE	TRUE
Cross-ancestry	autoRNFL_q6	chr10:68261045:G:A	chr10:68261100:C:G	a	g	10:68261100	1.08567	0.0822	0.337305	1.105e-24	67736409	68416974	680.565	827	eQTL	chr10_68261045_G_A_b38	a	chr10_68261045_G_A_b38	ENSG00000233590.1	RP11-153K11.3		Artery_Tibial	2.18951e-12	1.105e-24	0.337305	0.0468655	0.0822	0.008	SAME	0.234635	0.0236332	TRUE	TRUE
Cross-ancestry	autoRNFL_q6	chr10:68261045:G:A	chr10:68261100:C:G	a	g	10:68261100	1.08567	0.0822	0.334823	1.105e-24	67736409	68416974	680.565	827	eQTL	chr10_68280354_A_G_b38	a	chr10_68280354_A_G_b38	ENSG00000233590.1	RP11-153K11.3		Artery_Tibial	6.05149e-12	9.385e-24	0.334823	0.0475374	-0.0827	0.0082	OPPOSITE	0.222536	0.0224145	TRUE	TRUE
Cross-ancestry	autoRNFL_q6	chr10:68261045:G:A	chr10:68261100:C:G	a	g	10:68261100	1.08567	0.0822	0.423767	1.105e-24	67736409	68416974	680.565	827	eQTL	chr10_68280354_A_G_b38	a	chr10_68280354_A_G_b38	ENSG00000179774.8	ATOH7		Artery_Tibial	2.28763e-20	9.385e-24	0.423767	0.0439074	-0.0827	0.0082	OPPOSITE	0.410181	0.0112222	TRUE	TRUE
Cross-ancestry	autoRNFL_q6	chr10:68261045:G:A	chr10:68261100:C:G	a	g	10:68261100	1.08567	0.0822	0.334823	1.105e-24	67736409	68416974	680.565	827	eQTL	chr10_68281826_C_T_b38	t	chr10_68281826_C_T_b38	ENSG00000233590.1	RP11-153K11.3		Artery_Tibial	6.05149e-12	9.939e-24	0.334823	0.0475374	0.0827	0.0082	SAME	0.222536	0.0224145	TRUE	TRUE
Cross-ancestry	autoRNFL_q6	chr10:68261045:G:A	chr10:68261100:C:G	a	g	10:68261100	1.08567	0.0822	0.423767	1.105e-24	67736409	68416974	680.565	827	eQTL	chr10_68281826_C_T_b38	t	chr10_68281826_C_T_b38	ENSG00000179774.8	ATOH7		Artery_Tibial	2.28763e-20	9.939e-24	0.423767	0.0439074	0.0827	0.0082	SAME	0.410181	0.0112222	TRUE	TRUE
Cross-ancestry	autoRNFL_q6	chr10:68261045:G:A	chr10:68261100:C:G	a	g	10:68261100	1.08567	0.0822	0.340009	1.105e-24	67736409	68416974	680.565	827	eQTL	chr10_68284945_A_G_b38	a	chr10_68284945_A_G_b38	ENSG00000233590.1	RP11-153K11.3		Artery_Tibial	3.14715e-12	2.666e-23	0.340009	0.0476025	-0.0817	0.0082	OPPOSITE	0.213845	0.0215392	TRUE	TRUE
Cross-ancestry	autoRNFL_q1	chr10:68261045:G:A	chr10:68261100:C:G	a	g	10:68261100	1.04498	0.044	0.381502	3.04e-08	67736409	68416974	680.565	597	eQTL	chr10_68261045_G_A_b38	a	chr10_68261045_G_A_b38	ENSG00000179774.8	ATOH7		Artery_Aorta	2.91814e-08	3.04e-08	0.381502	0.0670683	0.044	0.0079	SAME	0.847785	0.0483244	TRUE	TRUE
Cross-ancestry	autoRNFL_q1	chr10:68261045:G:A	chr10:68261100:C:G	a	g	10:68261100	1.04498	0.044	0.338581	3.04e-08	67736409	68416974	680.565	597	eQTL	chr10_68232096_A_G_b38	a	chr10_68232096_A_G_b38	ENSG00000179774.8	ATOH7		Brain_Cerebellar_Hemisphere	3.99968e-06	4.701e-07	0.338581	0.0704117	-0.0412	0.0082	OPPOSITE	0.210445	0.0112326	TRUE	TRUE
Cross-ancestry	autoRNFL_q1	chr10:68261045:G:A	chr10:68261100:C:G	a	g	10:68261100	1.04498	0.044	0.337305	3.04e-08	67736409	68416974	680.565	597	eQTL	chr10_68261045_G_A_b38	a	chr10_68261045_G_A_b38	ENSG00000233590.1	RP11-153K11.3		Artery_Tibial	2.18951e-12	3.04e-08	0.337305	0.0468655	0.044	0.0079	SAME	0.842633	0.03671	TRUE	TRUE
Cross-ancestry	autoRNFL_q1	chr14:74199522:T:C	chr14:74126422:A:G	t	c	14:74126422	1.06503	0.063	0.562555	1.175e-08	73700162	74706180	1006.02	852	sQTL	chr14_73999038_A_T_b38	a	chr14_73999038_A_T_b38	ENSG00000119723.16	COQ6	chr14:73961570:73961737:clu_15994:ENSG00000119723.16	Brain_Hippocampus	3.04728e-08	0.002148	-0.562555	0.0958703	-0.0218	0.0071	SAME	0.948698	0.0277778	FALSE	TRUE
Cross-ancestry	autoRNFL_q1	chr8:108170015:T:C	chr8:108169744:C:T	t	c	8:108169744	0.944972	-0.0566	0.0921375	1.688e-12	107871017	108235425	364.408	448	eQTL	chr8_108145590_T_A_b38	a	chr8_108145590_T_A_b38	ENSG00000104408.9	EIF3E		Artery_Aorta	1.88749e-05	1.767e-09	-0.0921375	0.0212113	-0.0434	0.0072	SAME	0.657315	0.0125133	TRUE	TRUE
Cross-ancestry	autoRNFL_q1	chr8:108170015:T:C	chr8:108169744:C:T	t	c	8:108169744	0.944972	-0.0566	0.187546	1.688e-12	107871017	108235425	364.408	448	eQTL	chr8_108145590_T_A_b38	a	chr8_108145590_T_A_b38	ENSG00000147655.10	RSPO2		Brain_Cortex	4.52691e-06	1.767e-09	0.187546	0.0395399	-0.0434	0.0072	OPPOSITE	0.679385	0.0126872	TRUE	TRUE
Cross-ancestry	autoGCC_q8	chr10:68281826:C:T	chr10:68282506:A:G	t	c	10:68282506	0.952657	-0.0485	0.507797	5.301e-09	68156426	68422247	265.821	926	eQTL	chr10_68281826_C_T_b38	t	chr10_68281826_C_T_b38	ENSG00000108187.15	PBLD		Brain_Putamen_basal_ganglia	7.36559e-18	5.301e-09	-0.507797	0.0506823	-0.0485	0.0083	SAME	0.32554	0.025041	TRUE	TRUE
Cross-ancestry	autoGCC_q8	chr10:68281826:C:T	chr10:68282506:A:G	t	c	10:68282506	0.952657	-0.0485	0.507797	5.301e-09	68156426	68422247	265.821	926	eQTL	chr10_68280354_A_G_b38	a	chr10_68280354_A_G_b38	ENSG00000108187.15	PBLD		Brain_Putamen_basal_ganglia	7.36559e-18	5.435e-09	-0.507797	0.0506823	0.0484	0.0083	OPPOSITE	0.313313	0.0241005	TRUE	TRUE
Cross-ancestry	autoGCC_q8	chr10:68281826:C:T	chr10:68282506:A:G	t	c	10:68282506	0.952657	-0.0485	0.509245	5.301e-09	68156426	68422247	265.821	926	eQTL	chr10_68284945_A_G_b38	a	chr10_68284945_A_G_b38	ENSG00000108187.15	PBLD		Brain_Putamen_basal_ganglia	4.26406e-18	1.189e-08	-0.509245	0.0503459	0.0472	0.0083	OPPOSITE	0.325733	0.0250558	TRUE	TRUE
Cross-ancestry	autoGCC_q8	chr10:68281826:C:T	chr10:68282506:A:G	t	c	10:68282506	0.952657	-0.0485	0.459313	5.301e-09	68156426	68422247	265.821	926	eQTL	chr10_68284945_A_G_b38	a	chr10_68284945_A_G_b38	ENSG00000108187.15	PBLD		Brain_Amygdala	1.8199e-09	1.189e-08	-0.459313	0.0696577	0.0472	0.0083	OPPOSITE	0.485377	0.0193906	TRUE	TRUE
Cross-ancestry	autoGCC_q8	chr10:68281826:C:T	chr10:68282506:A:G	t	c	10:68282506	0.952657	-0.0485	0.380852	5.301e-09	68156426	68422247	265.821	926	eQTL	chr10_68281826_C_T_b38	t	chr10_68281826_C_T_b38	ENSG00000108187.15	PBLD		Brain_Cerebellar_Hemisphere	4.50896e-07	5.301e-09	-0.380852	0.0718009	-0.0485	0.0083	SAME	0.35883	0.0150286	TRUE	TRUE
Cross-ancestry	autoGCC_q8	chr10:68281826:C:T	chr10:68282506:A:G	t	c	10:68282506	0.952657	-0.0485	0.380852	5.301e-09	68156426	68422247	265.821	926	eQTL	chr10_68280354_A_G_b38	a	chr10_68280354_A_G_b38	ENSG00000108187.15	PBLD		Brain_Cerebellar_Hemisphere	4.50896e-07	5.435e-09	-0.380852	0.0718009	0.0484	0.0083	OPPOSITE	0.345353	0.0144641	TRUE	TRUE
Cross-ancestry	autoGCC_q8	chr10:68281826:C:T	chr10:68282506:A:G	t	c	10:68282506	0.952657	-0.0485	0.386207	5.301e-09	68156426	68422247	265.821	926	eQTL	chr10_68284945_A_G_b38	a	chr10_68284945_A_G_b38	ENSG00000108187.15	PBLD		Brain_Cerebellar_Hemisphere	3.47526e-07	1.189e-08	-0.386207	0.072033	0.0472	0.0083	OPPOSITE	0.269156	0.0112728	TRUE	TRUE
Cross-ancestry	autoGCC_q8	chr10:68281826:C:T	chr10:68282506:A:G	t	c	10:68282506	0.952657	-0.0485	0.334823	5.301e-09	68156426	68422247	265.821	926	eQTL	chr10_68281826_C_T_b38	t	chr10_68281826_C_T_b38	ENSG00000233590.1	RP11-153K11.3		Artery_Tibial	6.05149e-12	5.301e-09	0.334823	0.0475374	-0.0485	0.0083	OPPOSITE	0.301693	0.0145038	TRUE	TRUE
Cross-ancestry	autoGCC_q8	chr10:68281826:C:T	chr10:68282506:A:G	t	c	10:68282506	0.952657	-0.0485	0.334823	5.301e-09	68156426	68422247	265.821	926	eQTL	chr10_68280354_A_G_b38	a	chr10_68280354_A_G_b38	ENSG00000233590.1	RP11-153K11.3		Artery_Tibial	6.05149e-12	5.435e-09	0.334823	0.0475374	0.0484	0.0083	SAME	0.290362	0.0139591	TRUE	TRUE
Cross-ancestry	autoGCC_q8	chr10:68281826:C:T	chr10:68282506:A:G	t	c	10:68282506	0.952657	-0.0485	0.340009	5.301e-09	68156426	68422247	265.821	926	eQTL	chr10_68284945_A_G_b38	a	chr10_68284945_A_G_b38	ENSG00000233590.1	RP11-153K11.3		Artery_Tibial	3.14715e-12	1.189e-08	0.340009	0.0476025	0.0472	0.0083	SAME	0.31498	0.0151426	TRUE	TRUE
Cross-ancestry	autoGCC_q8	chr17:81562724:G:A	chr17:81145076:C:G	a	g	17:81145076	1.06418	0.0622	0.268831	1.391e-08	81064316	81195076	130.76	548	eQTL	chr17_81130962_C_T_b38	t	chr17_81130962_C_T_b38	ENSG00000279187.1	RP11-455O6.5		Artery_Aorta	8.66763e-05	0.01702	-0.268831	0.0676046	0.0175	0.0073	OPPOSITE	0.232413	0.0426839	TRUE	TRUE
Cross-ancestry	autoGCC_q8	chr17:81562724:G:A	chr17:81145076:C:G	a	g	17:81145076	1.06418	0.0622	0.139833	1.391e-08	81064316	81195076	130.76	548	eQTL	chr17_81128393_TAGG_T_b38	t	chr17_81128393_TAGG_T_b38	ENSG00000262877.4	RP11-1055B8.4		Artery_Tibial	0.000121431	0.04824	-0.139833	0.0361055	-0.0142	0.0072	SAME	0.606361	0.106659	TRUE	TRUE
Cross-ancestry	autoGCC_q3	chr17:81562724:G:A	chr17:81145076:C:G	a	g	17:81145076	0.929415	-0.0732	0.268831	2.32e-11	81064316	81195076	130.76	548	eQTL	chr17_81130962_C_T_b38	t	chr17_81130962_C_T_b38	ENSG00000279187.1	RP11-455O6.5		Artery_Aorta	8.66763e-05	0.01565	-0.268831	0.0676046	-0.0177	0.0073	SAME	0.339643	0.0585899	TRUE	TRUE
Cross-ancestry	autoGCC_q3	chr17:81562724:G:A	chr17:81145076:C:G	a	g	17:81145076	0.929415	-0.0732	0.139833	2.32e-11	81064316	81195076	130.76	548	eQTL	chr17_81128393_TAGG_T_b38	t	chr17_81128393_TAGG_T_b38	ENSG00000262877.4	RP11-1055B8.4		Artery_Tibial	0.000121431	0.04205	-0.139833	0.0361055	0.0146	0.0072	OPPOSITE	0.628001	0.0965567	TRUE	TRUE
Cross-ancestry	autoGCC_q2	chr14:59268154:G:C	chr14:59268292:A:G	c	g	14:59268292	0.942895	-0.0588	0.335065	1.856e-09	59169037	59497360	328.323	356	eQTL	chr14_59224912_A_G_b38	a	chr14_59224912_A_G_b38	ENSG00000100592.15	DAAM1		Brain_Cerebellum	2.14159e-07	6.768e-05	-0.335065	0.061951	0.0283	0.0071	OPPOSITE	0.879653	0.0218615	TRUE	TRUE
Cross-ancestry	autoGCC_q0	chr17:81562724:G:A	chr17:81145076:C:G	a	g	17:81145076	0.937255	-0.0648	0.268831	2.634e-09	81064316	81195076	130.76	548	eQTL	chr17_81130962_C_T_b38	t	chr17_81130962_C_T_b38	ENSG00000279187.1	RP11-455O6.5		Artery_Aorta	8.66763e-05	0.02629	-0.268831	0.0676046	-0.0161	0.0073	SAME	0.235244	0.0410041	TRUE	TRUE
Cross-ancestry	autoGCC_q0	chr17:81562724:G:A	chr17:81145076:C:G	a	g	17:81145076	0.937255	-0.0648	0.139833	2.634e-09	81064316	81195076	130.76	548	eQTL	chr17_81128393_TAGG_T_b38	t	chr17_81128393_TAGG_T_b38	ENSG00000262877.4	RP11-1055B8.4		Artery_Tibial	0.000121431	0.0348	-0.139833	0.0361055	0.015	0.0071	OPPOSITE	0.552187	0.0892784	TRUE	TRUE
Cross-ancestry	autoGCC_q4	chr10:68281826:C:T	chr10:68282506:A:G	t	c	10:68282506	0.950279	-0.051	0.509245	6.2e-10	68156426	68422247	265.821	926	eQTL	chr10_68284945_A_G_b38	a	chr10_68284945_A_G_b38	ENSG00000108187.15	PBLD		Brain_Putamen_basal_ganglia	4.26406e-18	1.517e-09	-0.509245	0.0503459	0.0497	0.0082	OPPOSITE	0.312284	0.0274384	TRUE	TRUE
Cross-ancestry	autoGCC_q4	chr10:68281826:C:T	chr10:68282506:A:G	t	c	10:68282506	0.950279	-0.051	0.507797	6.2e-10	68156426	68422247	265.821	926	eQTL	chr10_68281826_C_T_b38	t	chr10_68281826_C_T_b38	ENSG00000108187.15	PBLD		Brain_Putamen_basal_ganglia	7.36559e-18	6.2e-10	-0.507797	0.0506823	-0.051	0.0082	SAME	0.311347	0.0273561	TRUE	TRUE
Cross-ancestry	autoGCC_q4	chr10:68281826:C:T	chr10:68282506:A:G	t	c	10:68282506	0.950279	-0.051	0.507797	6.2e-10	68156426	68422247	265.821	926	eQTL	chr10_68280354_A_G_b38	a	chr10_68280354_A_G_b38	ENSG00000108187.15	PBLD		Brain_Putamen_basal_ganglia	7.36559e-18	6.245e-10	-0.507797	0.0506823	0.0509	0.0082	OPPOSITE	0.29957	0.0263213	TRUE	TRUE
Cross-ancestry	autoGCC_q4	chr10:68281826:C:T	chr10:68282506:A:G	t	c	10:68282506	0.950279	-0.051	0.381502	6.2e-10	68156426	68422247	265.821	926	eQTL	chr10_68261045_G_A_b38	a	chr10_68261045_G_A_b38	ENSG00000179774.8	ATOH7		Artery_Aorta	2.91814e-08	7.724e-09	0.381502	0.0670683	-0.0463	0.008	OPPOSITE	0.276643	0.0103751	TRUE	TRUE
Cross-ancestry	autoGCC_q4	chr10:68281826:C:T	chr10:68282506:A:G	t	c	10:68282506	0.950279	-0.051	0.459313	6.2e-10	68156426	68422247	265.821	926	eQTL	chr10_68284945_A_G_b38	a	chr10_68284945_A_G_b38	ENSG00000108187.15	PBLD		Brain_Amygdala	1.8199e-09	1.517e-09	-0.459313	0.0696577	0.0497	0.0082	OPPOSITE	0.481447	0.0212345	TRUE	TRUE
Cross-ancestry	autoGCC_q4	chr10:68281826:C:T	chr10:68282506:A:G	t	c	10:68282506	0.950279	-0.051	0.44808	6.2e-10	68156426	68422247	265.821	926	eQTL	chr10_68281826_C_T_b38	t	chr10_68281826_C_T_b38	ENSG00000108187.15	PBLD		Brain_Amygdala	4.78123e-09	6.2e-10	-0.44808	0.0701293	-0.051	0.0082	SAME	0.24397	0.0107604	TRUE	TRUE
Cross-ancestry	autoGCC_q4	chr10:68281826:C:T	chr10:68282506:A:G	t	c	10:68282506	0.950279	-0.051	0.44808	6.2e-10	68156426	68422247	265.821	926	eQTL	chr10_68280354_A_G_b38	a	chr10_68280354_A_G_b38	ENSG00000108187.15	PBLD		Brain_Amygdala	4.78123e-09	6.245e-10	-0.44808	0.0701293	0.0509	0.0082	OPPOSITE	0.234742	0.0103534	TRUE	TRUE
Cross-ancestry	autoGCC_q4	chr10:68281826:C:T	chr10:68282506:A:G	t	c	10:68282506	0.950279	-0.051	0.386207	6.2e-10	68156426	68422247	265.821	926	eQTL	chr10_68284945_A_G_b38	a	chr10_68284945_A_G_b38	ENSG00000108187.15	PBLD		Brain_Cerebellar_Hemisphere	3.47526e-07	1.517e-09	-0.386207	0.072033	0.0497	0.0082	OPPOSITE	0.266586	0.0123448	TRUE	TRUE
Cross-ancestry	autoGCC_q4	chr10:68281826:C:T	chr10:68282506:A:G	t	c	10:68282506	0.950279	-0.051	0.380852	6.2e-10	68156426	68422247	265.821	926	eQTL	chr10_68281826_C_T_b38	t	chr10_68281826_C_T_b38	ENSG00000108187.15	PBLD		Brain_Cerebellar_Hemisphere	4.50896e-07	6.2e-10	-0.380852	0.0718009	-0.051	0.0082	SAME	0.354548	0.016418	TRUE	TRUE
Cross-ancestry	autoGCC_q4	chr10:68281826:C:T	chr10:68282506:A:G	t	c	10:68282506	0.950279	-0.051	0.380852	6.2e-10	68156426	68422247	265.821	926	eQTL	chr10_68280354_A_G_b38	a	chr10_68280354_A_G_b38	ENSG00000108187.15	PBLD		Brain_Cerebellar_Hemisphere	4.50896e-07	6.245e-10	-0.380852	0.0718009	0.0509	0.0082	OPPOSITE	0.341137	0.015797	TRUE	TRUE
Cross-ancestry	autoGCC_q4	chr10:68281826:C:T	chr10:68282506:A:G	t	c	10:68282506	0.950279	-0.051	0.340009	6.2e-10	68156426	68422247	265.821	926	eQTL	chr10_68284945_A_G_b38	a	chr10_68284945_A_G_b38	ENSG00000233590.1	RP11-153K11.3		Artery_Tibial	3.14715e-12	1.517e-09	0.340009	0.0476025	0.0497	0.0082	SAME	0.305988	0.0165825	TRUE	TRUE
Cross-ancestry	autoGCC_q4	chr10:68281826:C:T	chr10:68282506:A:G	t	c	10:68282506	0.950279	-0.051	0.334823	6.2e-10	68156426	68422247	265.821	926	eQTL	chr10_68281826_C_T_b38	t	chr10_68281826_C_T_b38	ENSG00000233590.1	RP11-153K11.3		Artery_Tibial	6.05149e-12	6.2e-10	0.334823	0.0475374	-0.051	0.0082	OPPOSITE	0.292375	0.0158448	TRUE	TRUE
Cross-ancestry	autoGCC_q4	chr10:68281826:C:T	chr10:68282506:A:G	t	c	10:68282506	0.950279	-0.051	0.334823	6.2e-10	68156426	68422247	265.821	926	eQTL	chr10_68280354_A_G_b38	a	chr10_68280354_A_G_b38	ENSG00000233590.1	RP11-153K11.3		Artery_Tibial	6.05149e-12	6.245e-10	0.334823	0.0475374	0.0509	0.0082	SAME	0.281316	0.0152454	TRUE	TRUE
Cross-ancestry	autoGCC_q4	chr17:81644245:A:G	chr17:81145076:C:G	a	g	17:81145076	1.05169	0.0504	0.268831	2.573e-11	81064316	81195076	130.76	548	eQTL	chr17_81130962_C_T_b38	t	chr17_81130962_C_T_b38	ENSG00000279187.1	RP11-455O6.5		Artery_Aorta	8.66763e-05	0.01124	-0.268831	0.0676046	0.0184	0.0073	OPPOSITE	0.38522	0.0285594	TRUE	TRUE
Cross-ancestry	autoGCC_q4	chr17:81644245:A:G	chr17:81145076:C:G	a	g	17:81145076	1.05169	0.0504	0.139833	2.573e-11	81064316	81195076	130.76	548	eQTL	chr17_81128393_TAGG_T_b38	t	chr17_81128393_TAGG_T_b38	ENSG00000262877.4	RP11-1055B8.4		Artery_Tibial	0.000121431	0.08725	-0.139833	0.0361055	-0.0122	0.0071	SAME	0.670297	0.0455078	TRUE	FALSE

## Sheet: ECLIPSER_GTEx_Table2
ECLIPSER output Table 2 of EUR and cross-ancestry meta-analyses loci with GTEx tissues
Population	GWAS_Loci	Effect allele	Other Allele	P-VALUE	GWAS_effect	CHR_x	BP_Build38_x	GWAS_OR	GWAS_Trait	GWAS_variant(aligned to GTEx)	LD_interval_start(b38)	LD_interval_end(b38)	LD_interval_size(kb)	CHR_y	BP_Build38_y	# eQTL-tissue pairs (eCAVIAR)	CHR	BP_Build38	# eGenes tested (eCAVIAR)	# significant eQTL-tissue pairs (eCAVIAR)	# significant eGenes (eCAVIAR)	List_of_colocalizing_eGenes(eCAVIAR)	# sQTL-tissue pairs (eCAVIAR)	# sGenes tested (eCAVIAR)	# significant sQTL-tissue pairs (eCAVIAR)	# significant sGenes (eCAVIAR)	List_of_colocalizing_sGenes(eCAVIAR)	# significant sGenes by intron cluster (eCAVIAR)	List_of_colocalizing_sGenes_by_intron_cluster(eCAVIAR)	# e/sGenes tested (eCAVIAR)	# significantly colocalizing e/sGenes (eCAVIAR)	List_of_significantly_colocalizing_e/sGenes(eCAVIAR)	List_of_significantly_colocalizing_e/sGenes_by_CLPP(eCAVIAR)	List_of_significantly_colocalizing_e/sGenes_by_direction_of_effect(eCAVIAR)	List_of_significantly_colocalizing_e/sGenes_by_CLPP_and_direction_of_effect(eCAVIAR)
EUR	chr10:68263296:A:G	a	g	5.984e-10	-0.0526	chr10	68263296	0.948759	autoRNFL_q4	chr10:68263296:A:G	68098183	68868604	770.421	10	68263296	5	10	68263296	3	5	3	PBLD,ATOH7,RP11-153K11.3	0	0	0	0		0		3	3	ATOH7 (e), PBLD (e), RP11-153K11.3 (e)	ATOH7 (e,max_CLPP=0.03), PBLD (e,max_CLPP=0.02), RP11-153K11.3 (e,max_CLPP=0.02)	ATOH7 (e[1+,1-]), PBLD (e[2+]), RP11-153K11.3 (e[1+])	ATOH7 (e[1+,1-],max_CLPP=0.03), PBLD (e[2+],max_CLPP=0.02), RP11-153K11.3 (e[1+],max_CLPP=0.02)
EUR	chr2:171739103:T:TG	t	tg	1.908e-08	0.0492	chr2	171739103	1.05043	mocoRNFL_q7	chr2:171739103:T:TG	171558822	172127720	568.898	2	171739103	4	2	171739103	2	4	2	METAP1D,SLC25A12	0	0	0	0		0		2	2	METAP1D (e), SLC25A12 (e)	METAP1D (e,max_CLPP=0.18), SLC25A12 (e,max_CLPP=0.03)	METAP1D (e[1+,1-]), SLC25A12 (e[2+])	METAP1D (e[1+,1-],max_CLPP=0.32), SLC25A12 (e[2+],max_CLPP=0.14)
EUR	chr10:68254881:T:C	t	c	9.002e-09	0.049	chr10	68254881	1.05022	mocoRNFL_q5	chr10:68254881:T:C	68098183	68868604	770.421	10	68254881	3	10	68254881	2	3	2	PBLD,ATOH7	0	0	0	0		0		2	2	ATOH7 (e), PBLD (e)	ATOH7 (e,max_CLPP=0.01), PBLD (e,max_CLPP=0.01)	ATOH7 (e[1+,1-]), PBLD (e[1+])	ATOH7 (e[1+,1-],max_CLPP=0.01), PBLD (e[1+],max_CLPP=0.01)
EUR	chr10:68249632:C:T	t	c	4.046e-12	-0.0606	chr10	68249632	0.9412	mocoGCC_q3	chr10:68249632:C:T	68098183	68694402	596.219	10	68249632	2	10	68249632	1	2	1	ATOH7	0	0	0	0		0		1	1	ATOH7 (e)	ATOH7 (e,max_CLPP=0.02)	ATOH7 (e[2-])	ATOH7 (e[2-],max_CLPP=0.02)
EUR	chr17:81611261:G:A	a	g	7.202e-09	-0.0449	chr17	81611261	0.956093	mocoGCC_q3	chr17:81611261:G:A	81418853	81779444	360.591	17	81611261	4	17	81611261	1	4	1	TSPAN10	0	0	0	0		0		1	1	TSPAN10 (e)	TSPAN10 (e,max_CLPP=1.0)	TSPAN10 (e[4+])	TSPAN10 (e[4+],max_CLPP=1.0)
EUR	chr8:108279863:C:T	t	c	1.231e-08	-0.0491	chr8	108279863	0.952086	autoRNFL_q3	chr8:108279863:C:T	107951768	108622515	670.747	8	108279863	3	8	108279863	2	3	2	EMC2,EIF3E	5	1	5	1	EIF3E	2	EIF3E-chr8:108233672:108234998,EIF3E-chr8:108229195:108234998	2	2	EIF3E (e,s), EMC2 (e)	EIF3E (e,max_CLPP=0.01;s,max_CLPP=0.01), EMC2 (e,max_CLPP=0.01)	EIF3E (e[1-];s[2+,3-]), EMC2 (e[2+])	EIF3E (s[2+,3-],max_CLPP=0.03;e[1-],max_CLPP=0.01), EMC2 (e[2+],max_CLPP=0.01)
EUR	chr10:68253493:C:T	t	c	1.857e-18	-0.0736	chr10	68253493	0.929043	autoRNFL_q3	chr10:68253493:C:T	68098183	68868604	770.421	10	68253493	2	10	68253493	2	2	2	PBLD,ATOH7	0	0	0	0		0		2	2	ATOH7 (e), PBLD (e)	ATOH7 (e,max_CLPP=0.09), PBLD (e,max_CLPP=0.01)	ATOH7 (e[1+]), PBLD (e[1-])	ATOH7 (e[1+],max_CLPP=0.09), PBLD (e[1-],max_CLPP=0.01)
EUR	chr14:60606157:T:C	t	c	7.446e-12	0.0519	chr14	60606157	1.05327	autoRNFL_q3	chr14:60606157:T:C	60270263	61166622	896.359	14	60606157	1	14	60606157	1	1	1	PCNX4	0	0	0	0		0		1	1	PCNX4 (e)	PCNX4 (e,max_CLPP=0.03)	PCNX4 (e[1+])	PCNX4 (e[1+],max_CLPP=0.03)
EUR	chr10:68281826:C:T	t	c	1.566e-09	-0.0528	chr10	68281826	0.94857	autoRNFL_q8	chr10:68281826:C:T	68098183	68880887	782.704	10	68281826	4	10	68281826	3	4	3	PBLD,ATOH7,RP11-153K11.3	0	0	0	0		0		3	3	ATOH7 (e), PBLD (e), RP11-153K11.3 (e)	ATOH7 (e,max_CLPP=0.02), PBLD (e,max_CLPP=0.02), RP11-153K11.3 (e,max_CLPP=0.01)	ATOH7 (e[1-]), PBLD (e[2+]), RP11-153K11.3 (e[1-])	ATOH7 (e[1-],max_CLPP=0.02), PBLD (e[2+],max_CLPP=0.02), RP11-153K11.3 (e[1-],max_CLPP=0.01)
EUR	chr14:60642107:C:A	a	c	4.697e-08	-0.0415	chr14	60642107	0.959349	autoRNFL_q8	chr14:60642107:C:A	60270263	61166622	896.359	14	60642107	3	14	60642107	3	3	3	SLC38A6,SIX4,PCNX4	0	0	0	0		0		3	3	PCNX4 (e), SIX4 (e), SLC38A6 (e)	PCNX4 (e,max_CLPP=0.02), SIX4 (e,max_CLPP=0.06), SLC38A6 (e,max_CLPP=0.03)	PCNX4 (e[1+]), SIX4 (e[1-]), SLC38A6 (e[1-])	PCNX4 (e[1+],max_CLPP=0.02), SIX4 (e[1-],max_CLPP=0.06), SLC38A6 (e[1-],max_CLPP=0.03)
EUR	chr10:68263296:A:G	a	g	9.644e-16	-0.0681	chr10	68263296	0.934167	mocoRNFL_q1	chr10:68263296:A:G	68098183	68868604	770.421	10	68263296	3	10	68263296	2	3	2	ATOH7,RP11-153K11.3	0	0	0	0		0		2	2	ATOH7 (e), RP11-153K11.3 (e)	ATOH7 (e,max_CLPP=0.02), RP11-153K11.3 (e,max_CLPP=0.01)	ATOH7 (e[1+,1-]), RP11-153K11.3 (e[1+])	ATOH7 (e[1+,1-],max_CLPP=0.09), RP11-153K11.3 (e[1+],max_CLPP=0.01)
EUR	chr14:60605940:G:A	a	g	2.36e-08	0.0456	chr14	60605940	1.04666	mocoRNFL_q1	chr14:60605940:G:A	60270263	61090338	820.075	14	60605940	1	14	60605940	1	1	1	PCNX4	0	0	0	0		0		1	1	PCNX4 (e)	PCNX4 (e,max_CLPP=0.01)	PCNX4 (e[1-])	PCNX4 (e[1-],max_CLPP=0.01)
EUR	chr8:108182372:CA:C	ca	c	4.697e-08	-0.0483	chr8	108182372	0.952848	mocoRNFL_q1	chr8:108182372:CA:C	107951768	108626098	674.33	8	108182372	0			0	0	0		2	1	2	1	EIF3E	2	EIF3E-chr8:108229195:108234998,EIF3E-chr8:108233672:108234998	1	1	EIF3E (s)	EIF3E (s,max_CLPP=0.01)	EIF3E (s[1+,1-])	EIF3E (s[1+,1-],max_CLPP=0.02)
EUR	chr10:68263296:A:G	a	g	4.624e-25	-0.0877	chr10	68263296	0.916036	autoRNFL_q6	chr10:68263296:A:G	68098183	68868604	770.421	10	68263296	6	10	68263296	3	6	3	PBLD,ATOH7,RP11-153K11.3	0	0	0	0		0		3	3	ATOH7 (e), PBLD (e), RP11-153K11.3 (e)	ATOH7 (e,max_CLPP=0.03), PBLD (e,max_CLPP=0.02), RP11-153K11.3 (e,max_CLPP=0.01)	ATOH7 (e[2+,1-]), PBLD (e[1+,1-]), RP11-153K11.3 (e[1+])	ATOH7 (e[2+,1-],max_CLPP=0.03), PBLD (e[1+,1-],max_CLPP=0.02), RP11-153K11.3 (e[1+],max_CLPP=0.01)
EUR	chr10:68282613:C:G	c	g	5.656e-15	-0.075	chr10	68282613	0.927743	autoRNFL_q6	chr10:68282613:C:G	68032613	68532613	500	10	68282613	5	10	68282613	3	5	3	PBLD,ATOH7,RP11-153K11.3	0	0	0	0		0		3	3	ATOH7 (e), PBLD (e), RP11-153K11.3 (e)	ATOH7 (e,max_CLPP=0.03), PBLD (e,max_CLPP=0.02), RP11-153K11.3 (e,max_CLPP=0.01)	ATOH7 (e[1+,1-]), PBLD (e[1+,1-]), RP11-153K11.3 (e[1+])	ATOH7 (e[1+,1-],max_CLPP=0.03), PBLD (e[1+,1-],max_CLPP=0.02), RP11-153K11.3 (e[1+],max_CLPP=0.01)
EUR	chr10:68282614:T:G	t	g	2.254e-13	-0.0829	chr10	68282614	0.920443	autoRNFL_q6	chr10:68282614:T:G	68032614	68532614	500	10	68282614	3	10	68282614	3	3	3	PBLD,ATOH7,RP11-153K11.3	0	0	0	0		0		3	3	ATOH7 (e), PBLD (e), RP11-153K11.3 (e)	ATOH7 (e,max_CLPP=0.01), PBLD (e,max_CLPP=0.01), RP11-153K11.3 (e,max_CLPP=0.01)	ATOH7 (e[1-]), PBLD (e[1+]), RP11-153K11.3 (e[1+])	ATOH7 (e[1-],max_CLPP=0.01), PBLD (e[1+],max_CLPP=0.01), RP11-153K11.3 (e[1+],max_CLPP=0.01)
EUR	chr14:60341147:T:G	t	g	4.761e-11	-0.0512	chr14	60341147	0.950089	autoRNFL_q6	chr14:60341147:T:G	60270263	61166622	896.359	14	60341147	1	14	60341147	1	1	1	PCNX4	0	0	0	0		0		1	1	PCNX4 (e)	PCNX4 (e,max_CLPP=0.03)	PCNX4 (e[1-])	PCNX4 (e[1-],max_CLPP=0.03)
EUR	chr8:108170015:T:C	t	c	1.177e-12	-0.0608	chr8	108170015	0.941011	autoRNFL_q1	chr8:108170015:T:C	107951768	108622515	670.747	8	108170015	2	8	108170015	2	2	2	EMC2,EIF3E	3	1	3	1	EIF3E	2	EIF3E-chr8:108233672:108234998,EIF3E-chr8:108229195:108234998	2	2	EIF3E (e,s), EMC2 (e)	EIF3E (e,max_CLPP=0.02;s,max_CLPP=0.01), EMC2 (e,max_CLPP=0.01)	EIF3E (e[1-];s[1+,2-]), EMC2 (e[1-])	EIF3E (s[1+,2-],max_CLPP=0.05;e[1-],max_CLPP=0.02), EMC2 (e[1-],max_CLPP=0.01)
EUR	chr8:108182306:CA:C	ca	c	1.019e-09	-0.0471	chr8	108182306	0.953992	autoRNFL_q1	chr8:108182306:CA:C	107808895	108626011	817.116	8	108182306	2	8	108182306	2	2	2	EMC2,EIF3E	3	1	3	1	EIF3E	2	EIF3E-chr8:108233672:108234998,EIF3E-chr8:108229195:108234998	2	2	EIF3E (e,s), EMC2 (e)	EIF3E (e,max_CLPP=0.02;s,max_CLPP=0.01), EMC2 (e,max_CLPP=0.01)	EIF3E (e[1-];s[1+,2-]), EMC2 (e[1-])	EIF3E (s[1+,2-],max_CLPP=0.05;e[1-],max_CLPP=0.02), EMC2 (e[1-],max_CLPP=0.01)
EUR	chr8:108246284:TGGG:T	t	tggg	2.569e-09	0.0484	chr8	108246284	1.04959	autoRNFL_q1	chr8:108246284:TGGG:T	107659964	109145959	1485.99	8	108246284	2	8	108246284	2	2	2	EMC2,EIF3E	0	0	0	0		0		2	2	EIF3E (e), EMC2 (e)	EIF3E (e,max_CLPP=0.02), EMC2 (e,max_CLPP=0.01)	EIF3E (e[1+]), EMC2 (e[1-])	EIF3E (e[1+],max_CLPP=0.02), EMC2 (e[1-],max_CLPP=0.01)
EUR	chr10:68254383:T:C	t	c	1.483e-08	-0.048	chr10	68254383	0.953134	autoRNFL_q1	chr10:68254383:T:C	68098183	68868604	770.421	10	68254383	3	10	68254383	3	3	3	PBLD,ATOH7,RP11-153K11.3	0	0	0	0		0		3	3	ATOH7 (e), PBLD (e), RP11-153K11.3 (e)	ATOH7 (e,max_CLPP=0.02), PBLD (e,max_CLPP=0.01), RP11-153K11.3 (e,max_CLPP=0.01)	ATOH7 (e[1+]), PBLD (e[1-]), RP11-153K11.3 (e[1+])	ATOH7 (e[1+],max_CLPP=0.02), PBLD (e[1-],max_CLPP=0.01), RP11-153K11.3 (e[1+],max_CLPP=0.01)
EUR	chr17:81619201:TA:T	t	ta	4.088e-10	-0.0493	chr17	81619201	0.951896	autoGCC_q6	chr17:81619201:TA:T	81418853	81779444	360.591	17	81619201	4	17	81619201	1	4	1	TSPAN10	0	0	0	0		0		1	1	TSPAN10 (e)	TSPAN10 (e,max_CLPP=1.0)	TSPAN10 (e[4+])	TSPAN10 (e[4+],max_CLPP=1.0)
EUR	chr20:14556216:T:C	t	c	3.823e-09	0.0493	chr20	14556216	1.05054	autoRNFL_q7	chr20:14556216:T:C	14177203	14996199	818.996	20	14556216	1	20	14556216	1	1	1	NDUFAF5	0	0	0	0		0		1	1	NDUFAF5 (e)	NDUFAF5 (e,max_CLPP=0.01)	NDUFAF5 (e[1-])	NDUFAF5 (e[1-],max_CLPP=0.01)
EUR	chr17:81562724:G:A	a	g	1.015e-08	0.0663	chr17	81562724	1.06855	autoGCC_q8	chr17:81562724:G:A	81413132	81772846	359.714	17	81562724	4	17	81562724	1	4	1	TSPAN10	0	0	0	0		0		1	1	TSPAN10 (e)	TSPAN10 (e,max_CLPP=1.0)	TSPAN10 (e[4+])	TSPAN10 (e[4+],max_CLPP=1.0)
EUR	chr17:81647906:TTAAC:T	t	ttaac	1.711e-15	-0.0621	chr17	81647906	0.939789	autoGCC_q8	chr17:81647906:T:TTAAC	81418853	81779444	360.591	17	81647906	4	17	81647906	1	4	1	TSPAN10	0	0	0	0		0		1	1	TSPAN10 (e)	TSPAN10 (e,max_CLPP=1.0)	TSPAN10 (e[4+])	TSPAN10 (e[4+],max_CLPP=1.0)
EUR	chr17:81562724:G:A	a	g	1.608e-11	-0.0781	chr17	81562724	0.924872	autoGCC_q3	chr17:81562724:G:A	81413132	81772846	359.714	17	81562724	4	17	81562724	1	4	1	TSPAN10	0	0	0	0		0		1	1	TSPAN10 (e)	TSPAN10 (e,max_CLPP=1.0)	TSPAN10 (e[4-])	TSPAN10 (e[4-],max_CLPP=1.0)
EUR	chr17:81646844:G:T	t	g	1.221e-10	-0.0562	chr17	81646844	0.94535	autoGCC_q3	chr17:81646844:G:T	81396844	81896844	500	17	81646844	1	17	81646844	1	1	1	TSPAN10	0	0	0	0		0		1	1	TSPAN10 (e)	TSPAN10 (e,max_CLPP=0.01)	TSPAN10 (e[1-])	TSPAN10 (e[1-],max_CLPP=0.03)
EUR	chr17:81647906:TTAAC:T	t	ttaac	8.44e-22	0.075	chr17	81647906	1.07788	autoGCC_q3	chr17:81647906:T:TTAAC	81418853	81779444	360.591	17	81647906	4	17	81647906	1	4	1	TSPAN10	0	0	0	0		0		1	1	TSPAN10 (e)	TSPAN10 (e,max_CLPP=1.0)	TSPAN10 (e[4-])	TSPAN10 (e[4-],max_CLPP=1.0)
EUR	chr14:59270382:G:A	a	g	1.436e-08	-0.0577	chr14	59270382	0.943933	autoGCC_q2	chr14:59270382:G:A	58935814	59617355	681.541	14	59270382	1	14	59270382	1	1	1	DAAM1	0	0	0	0		0		1	1	DAAM1 (e)	DAAM1 (e,max_CLPP=0.05)	DAAM1 (e[1-])	DAAM1 (e[1-],max_CLPP=0.05)
EUR	chr14:60509819:C:A	a	c	4.682e-09	-0.0449	chr14	60509819	0.956093	autoGCC_q2	chr14:60509819:C:A	60270263	61166622	896.359	14	60509819	2	14	60509819	2	2	2	TMEM30B,PCNX4	0	0	0	0		0		2	2	PCNX4 (e), TMEM30B (e)	PCNX4 (e,max_CLPP=0.02), TMEM30B (e,max_CLPP=0.01)	PCNX4 (e[1+]), TMEM30B (e[1+])	PCNX4 (e[1+],max_CLPP=0.02), TMEM30B (e[1+],max_CLPP=0.01)
EUR	chr10:68263296:A:G	a	g	3.084e-13	-0.0618	chr10	68263296	0.940071	mocoRNFL_q9	chr10:68263296:A:G	68098183	68868604	770.421	10	68263296	3	10	68263296	2	3	2	ATOH7,RP11-153K11.3	0	0	0	0		0		2	2	ATOH7 (e), RP11-153K11.3 (e)	ATOH7 (e,max_CLPP=0.07), RP11-153K11.3 (e,max_CLPP=0.04)	ATOH7 (e[1+,1-]), RP11-153K11.3 (e[1+])	ATOH7 (e[1+,1-],max_CLPP=0.07), RP11-153K11.3 (e[1+],max_CLPP=0.04)
EUR	chr17:81562261:G:A	a	g	5.681e-09	-0.0669	chr17	81562261	0.935289	autoGCC_q0	chr17:81562261:G:A	81413132	81772846	359.714	17	81562261	3	17	81562261	1	3	1	TSPAN10	0	0	0	0		0		1	1	TSPAN10 (e)	TSPAN10 (e,max_CLPP=1.0)	TSPAN10 (e[3-])	TSPAN10 (e[3-],max_CLPP=1.0)
EUR	chr17:81647906:TTAAC:T	t	ttaac	1.414e-21	0.0737	chr17	81647906	1.07648	autoGCC_q0	chr17:81647906:T:TTAAC	81418853	81779444	360.591	17	81647906	3	17	81647906	1	3	1	TSPAN10	0	0	0	0		0		1	1	TSPAN10 (e)	TSPAN10 (e,max_CLPP=1.0)	TSPAN10 (e[3-])	TSPAN10 (e[3-],max_CLPP=1.0)
EUR	chr15:27985172:C:T	t	c	2.52e-08	-0.0745	chr15	27985172	0.928207	autoGCC_q4	chr15:27985172:C:T	27684286	28789849	1105.56	15	27985172	5	15	27985172	2	5	2	HERC2P9,RP11-578F21.2	4	1	4	1	WHAMMP2	1	WHAMMP2-chr15:28746149:28747710	3	3	HERC2P9 (e), RP11-578F21.2 (e), WHAMMP2 (s)	HERC2P9 (e,max_CLPP=0.02), RP11-578F21.2 (e,max_CLPP=0.03), WHAMMP2 (s,max_CLPP=0.03)	HERC2P9 (e[4-]), RP11-578F21.2 (e[1-]), WHAMMP2 (s[4-])	HERC2P9 (e[4-],max_CLPP=0.04), RP11-578F21.2 (e[1-],max_CLPP=0.03), WHAMMP2 (s[4-],max_CLPP=0.03)
EUR	chr17:81644245:A:G	a	g	4.123e-11	0.051	chr17	81644245	1.05232	autoGCC_q4	chr17:81644245:A:G	81418853	81779444	360.591	17	81644245	4	17	81644245	1	4	1	TSPAN10	0	0	0	0		0		1	1	TSPAN10 (e)	TSPAN10 (e,max_CLPP=1.0)	TSPAN10 (e[4+])	TSPAN10 (e[4+],max_CLPP=1.0)
Cross-ancestry	chr10:68212053:TAG:T	t	tag	2.061e-09	-0.0566	chr10	68212053	0.944972	mocoRNFL_q5	chr10:68212011:A:G	67947672	68343078	395.406	10	68212053	8	10	68212053	3	8	3	ATOH7,DNAJC12,PBLD	0	0	0	0		0		3	3	ATOH7 (e), DNAJC12 (e), PBLD (e)	ATOH7 (e,max_CLPP=0.02), DNAJC12 (e,max_CLPP=0.02), PBLD (e,max_CLPP=0.01)	ATOH7 (e[1+,2-]), DNAJC12 (e[1+]), PBLD (e[3+,1-])	ATOH7 (e[1+,2-],max_CLPP=0.02), DNAJC12 (e[1+],max_CLPP=0.02), PBLD (e[3+,1-],max_CLPP=0.01)
Cross-ancestry	chr10:68254881:T:C	t	c	4.341e-15	-0.0626	chr10	68254881	0.939319	mocoRNFL_q1	chr10:68254831:A:G	68033346	68563436	530.09	10	68254881	3	10	68254881	2	3	2	ATOH7,RP11-153K11.3	0	0	0	0		0		2	2	ATOH7 (e), RP11-153K11.3 (e)	ATOH7 (e,max_CLPP=0.05), RP11-153K11.3 (e,max_CLPP=0.03)	ATOH7 (e[1+,1-]), RP11-153K11.3 (e[1+])	ATOH7 (e[1+,1-],max_CLPP=0.05), RP11-153K11.3 (e[1+],max_CLPP=0.03)
Cross-ancestry	chr10:68261045:G:A	a	g	1.894e-09	0.0478	chr10	68261045	1.04896	autoRNFL_q4	chr10:68261100:C:G	67736409	68416974	680.565	10	68261045	7	10	68261045	3	7	3	PBLD,ATOH7,RP11-153K11.3	0	0	0	0		0		3	3	ATOH7 (e), PBLD (e), RP11-153K11.3 (e)	ATOH7 (e,max_CLPP=0.08), PBLD (e,max_CLPP=0.04), RP11-153K11.3 (e,max_CLPP=0.01)	ATOH7 (e[2+,1-]), PBLD (e[1+,2-]), RP11-153K11.3 (e[1+])	ATOH7 (e[2+,1-],max_CLPP=0.08), PBLD (e[1+,2-],max_CLPP=0.04), RP11-153K11.3 (e[1+],max_CLPP=0.06)
Cross-ancestry	chr10:68261045:G:A	a	g	3.501e-18	-0.07	chr10	68261045	0.932394	autoRNFL_q3	chr10:68261100:C:G	67736409	68416974	680.565	10	68261045	2	10	68261045	2	2	2	PBLD,ATOH7	0	0	0	0		0		2	2	ATOH7 (e), PBLD (e)	ATOH7 (e,max_CLPP=0.01), PBLD (e,max_CLPP=0.01)	ATOH7 (e[1+]), PBLD (e[1-])	ATOH7 (e[1+],max_CLPP=0.01), PBLD (e[1-],max_CLPP=0.01)
Cross-ancestry	chr10:68261045:G:A	a	g	1.105e-24	0.0822	chr10	68261045	1.08567	autoRNFL_q6	chr10:68261100:C:G	67736409	68416974	680.565	10	68261045	6	10	68261045	3	6	3	PBLD,ATOH7,RP11-153K11.3	0	0	0	0		0		3	3	ATOH7 (e), PBLD (e), RP11-153K11.3 (e)	ATOH7 (e,max_CLPP=0.09), PBLD (e,max_CLPP=0.04), RP11-153K11.3 (e,max_CLPP=0.02)	ATOH7 (e[1+,1-]), PBLD (e[3+]), RP11-153K11.3 (e[1+])	ATOH7 (e[1+,1-],max_CLPP=0.09), PBLD (e[3+],max_CLPP=0.04), RP11-153K11.3 (e[1+],max_CLPP=0.02)
Cross-ancestry	chr10:68261045:G:A	a	g	3.04e-08	0.044	chr10	68261045	1.04498	autoRNFL_q1	chr10:68261100:C:G	67736409	68416974	680.565	10	68261045	3	10	68261045	2	3	2	ATOH7,RP11-153K11.3	0	0	0	0		0		2	2	ATOH7 (e), RP11-153K11.3 (e)	ATOH7 (e,max_CLPP=0.05), RP11-153K11.3 (e,max_CLPP=0.04)	ATOH7 (e[1+,1-]), RP11-153K11.3 (e[1+])	ATOH7 (e[1+,1-],max_CLPP=0.05), RP11-153K11.3 (e[1+],max_CLPP=0.04)
Cross-ancestry	chr10:68281826:C:T	t	c	1.691e-11	-0.0559	chr10	68281826	0.945634	mocoGCC_q3	chr10:68282506:A:G	68156426	68422247	265.821	10	68281826	5	10	68281826	3	5	3	PBLD,ATOH7,RP11-153K11.3	0	0	0	0		0		3	3	ATOH7 (e), PBLD (e), RP11-153K11.3 (e)	ATOH7 (e,max_CLPP=0.02), PBLD (e,max_CLPP=0.02), RP11-153K11.3 (e,max_CLPP=0.01)	ATOH7 (e[1-]), PBLD (e[3-]), RP11-153K11.3 (e[1+])	ATOH7 (e[1-],max_CLPP=0.02), PBLD (e[3-],max_CLPP=0.02), RP11-153K11.3 (e[1+],max_CLPP=0.01)
Cross-ancestry	chr10:68281826:C:T	t	c	5.301e-09	-0.0485	chr10	68281826	0.952657	autoGCC_q8	chr10:68282506:A:G	68156426	68422247	265.821	10	68281826	4	10	68281826	2	4	2	PBLD,RP11-153K11.3	0	0	0	0		0		2	2	PBLD (e), RP11-153K11.3 (e)	PBLD (e,max_CLPP=0.03), RP11-153K11.3 (e,max_CLPP=0.01)	PBLD (e[1+,2-]), RP11-153K11.3 (e[1+])	PBLD (e[1+,2-],max_CLPP=0.03), RP11-153K11.3 (e[1+],max_CLPP=0.02)
Cross-ancestry	chr10:68281826:C:T	t	c	6.2e-10	-0.051	chr10	68281826	0.950279	autoGCC_q4	chr10:68282506:A:G	68156426	68422247	265.821	10	68281826	5	10	68281826	3	5	3	PBLD,ATOH7,RP11-153K11.3	0	0	0	0		0		3	3	ATOH7 (e), PBLD (e), RP11-153K11.3 (e)	ATOH7 (e,max_CLPP=0.01), PBLD (e,max_CLPP=0.03), RP11-153K11.3 (e,max_CLPP=0.02)	ATOH7 (e[1-]), PBLD (e[1+,2-]), RP11-153K11.3 (e[1+])	ATOH7 (e[1-],max_CLPP=0.01), PBLD (e[1+,2-],max_CLPP=0.03), RP11-153K11.3 (e[1+],max_CLPP=0.02)
Cross-ancestry	chr14:59268154:G:C	c	g	1.856e-09	-0.0588	chr14	59268154	0.942895	autoGCC_q2	chr14:59268292:A:G	59169037	59497360	328.323	14	59268154	1	14	59268154	1	1	1	DAAM1	0	0	0	0		0		1	1	DAAM1 (e)	DAAM1 (e,max_CLPP=0.02)	DAAM1 (e[1-])	DAAM1 (e[1-],max_CLPP=0.02)
Cross-ancestry	chr14:59270382:G:A	a	g	2.91e-08	-0.0518	chr14	59270382	0.949519	autoGCC_q10	chr14:59336116:C:T	59164061	59497831	333.77	14	59270382	27	14	59270382	6	27	6	L3HYPDH,CCDC175,DAAM1,RTN1,GPR135,JKAMP	14	5	14	5	L3HYPDH,CCDC175,GPR135,JKAMP,RTN1	7	L3HYPDH-chr14:59473090:59474439,L3HYPDH-chr14:59461173:59475869,CCDC175-chr14:59525434:59527095,GPR135-chr14:59455760:59456438,JKAMP-chr14:59484593:59486681,RTN1-chr14:59607492:59630446,L3HYPDH-chr14:59473090:59475869	6	6	CCDC175 (e,s), DAAM1 (e), GPR135 (e,s), JKAMP (e,s), L3HYPDH (e,s), RTN1 (e,s)	CCDC175 (e,max_CLPP=0.02;s,max_CLPP=0.15), DAAM1 (e,max_CLPP=0.02), GPR135 (e,max_CLPP=0.16;s,max_CLPP=0.16), JKAMP (e,max_CLPP=0.14;s,max_CLPP=0.21), L3HYPDH (e,max_CLPP=0.16;s,max_CLPP=0.16), RTN1 (e,max_CLPP=0.07;s,max_CLPP=0.1)	CCDC175 (e[1+,1-];s[2-]), DAAM1 (e[2+]), GPR135 (e[2-];s[2+]), JKAMP (e[1-];s[3-]), L3HYPDH (e[18+];s[2+,4-]), RTN1 (e[2-];s[1-])	CCDC175 (e[1+,1-],max_CLPP=0.35;s[2-],max_CLPP=0.2), DAAM1 (e[2+],max_CLPP=0.17), GPR135 (s[2+],max_CLPP=0.27;e[2-],max_CLPP=0.16), JKAMP (s[3-],max_CLPP=0.24;e[1-],max_CLPP=0.14), L3HYPDH (s[2+,4-],max_CLPP=0.25;e[18+],max_CLPP=0.24), RTN1 (s[1-],max_CLPP=0.19;e[2-],max_CLPP=0.14)
Cross-ancestry	chr14:74070028:C:T	t	c	2.105e-09	-0.065	chr14	74070028	0.937067	autoRNFL_q4	chr14:74126422:A:G	73700162	74706180	1006.02	14	74070028	2	14	74070028	2	2	2	FAM161B,ENTPD5	3	2	3	2	COQ6,ZNF410	3	COQ6-chr14:73958245:73958971,ZNF410-chr14:73922206:73922493,COQ6-chr14:73961570:73961737	4	4	COQ6 (s), ENTPD5 (e), FAM161B (e), ZNF410 (s)	COQ6 (s,max_CLPP=0.02), ENTPD5 (e,max_CLPP=0.01), FAM161B (e,max_CLPP=0.02), ZNF410 (s,max_CLPP=0.01)	COQ6 (s[2+]), ENTPD5 (e[1-]), FAM161B (e[1-]), ZNF410 (s[1+])	COQ6 (s[2+],max_CLPP=0.02), ENTPD5 (e[1-],max_CLPP=0.01), FAM161B (e[1-],max_CLPP=0.02), ZNF410 (s[1+],max_CLPP=0.01)
Cross-ancestry	chr14:74199522:T:C	t	c	4.47e-08	-0.0613	chr14	74199522	0.940541	mocoRNFL_q5	chr14:74126422:A:G	73700162	74706180	1006.02	14	74199522	1	14	74199522	1	1	1	ENTPD5	1	1	1	1	COQ6	1	COQ6-chr14:73961570:73961737	2	2	COQ6 (s), ENTPD5 (e)	COQ6 (s,max_CLPP=0.09), ENTPD5 (e,max_CLPP=0.01)	COQ6 (s[1-]), ENTPD5 (e[1+])	COQ6 (s[1-],max_CLPP=0.09), ENTPD5 (e[1+],max_CLPP=0.01)
Cross-ancestry	chr14:74199522:T:C	t	c	1.175e-08	0.063	chr14	74199522	1.06503	autoRNFL_q1	chr14:74126422:A:G	73700162	74706180	1006.02	14	74199522	0			0	0	0		1	1	1	1	COQ6	1	COQ6-chr14:73961570:73961737	1	1	COQ6 (s)	COQ6 (s,max_CLPP=0.03)	COQ6 (s[1+])	COQ6 (s[1+],max_CLPP=0.03)
Cross-ancestry	chr17:81562724:G:A	a	g	1.391e-08	0.0622	chr17	81562724	1.06418	autoGCC_q8	chr17:81145076:C:G	81064316	81195076	130.76	17	81562724	2	17	81562724	2	2	2	RP11-455O6.5,RP11-1055B8.4	0	0	0	0		0		2	2	RP11-1055B8.4 (e), RP11-455O6.5 (e)	RP11-1055B8.4 (e,max_CLPP=0.11), RP11-455O6.5 (e,max_CLPP=0.04)	RP11-1055B8.4 (e[1+]), RP11-455O6.5 (e[1-])	RP11-1055B8.4 (e[1+],max_CLPP=0.11), RP11-455O6.5 (e[1-],max_CLPP=0.04)
Cross-ancestry	chr17:81562724:G:A	a	g	2.32e-11	-0.0732	chr17	81562724	0.929415	autoGCC_q3	chr17:81145076:C:G	81064316	81195076	130.76	17	81562724	2	17	81562724	2	2	2	RP11-455O6.5,RP11-1055B8.4	0	0	0	0		0		2	2	RP11-1055B8.4 (e), RP11-455O6.5 (e)	RP11-1055B8.4 (e,max_CLPP=0.1), RP11-455O6.5 (e,max_CLPP=0.06)	RP11-1055B8.4 (e[1-]), RP11-455O6.5 (e[1+])	RP11-1055B8.4 (e[1-],max_CLPP=0.1), RP11-455O6.5 (e[1+],max_CLPP=0.06)
Cross-ancestry	chr17:81562724:G:A	a	g	2.634e-09	-0.0648	chr17	81562724	0.937255	autoGCC_q0	chr17:81145076:C:G	81064316	81195076	130.76	17	81562724	2	17	81562724	2	2	2	RP11-455O6.5,RP11-1055B8.4	0	0	0	0		0		2	2	RP11-1055B8.4 (e), RP11-455O6.5 (e)	RP11-1055B8.4 (e,max_CLPP=0.09), RP11-455O6.5 (e,max_CLPP=0.04)	RP11-1055B8.4 (e[1-]), RP11-455O6.5 (e[1+])	RP11-1055B8.4 (e[1-],max_CLPP=0.09), RP11-455O6.5 (e[1+],max_CLPP=0.04)
Cross-ancestry	chr17:81644245:A:G	a	g	2.573e-11	0.0504	chr17	81644245	1.05169	autoGCC_q4	chr17:81145076:C:G	81064316	81195076	130.76	17	81644245	2	17	81644245	2	1	1	RP11-455O6.5	0	0	0	0		0		2	1	RP11-455O6.5 (e)	RP11-455O6.5 (e,max_CLPP=0.03)	RP11-455O6.5 (e[1-])	RP11-455O6.5 (e[1-],max_CLPP=0.03)
Cross-ancestry	chr8:108170015:T:C	t	c	1.688e-12	-0.0566	chr8	108170015	0.944972	autoRNFL_q1	chr8:108169744:C:T	107871017	108235425	364.408	8	108170015	2	8	108170015	2	2	2	EIF3E,RSPO2	0	0	0	0		0		2	2	EIF3E (e), RSPO2 (e)	EIF3E (e,max_CLPP=0.01), RSPO2 (e,max_CLPP=0.01)	EIF3E (e[1+]), RSPO2 (e[1-])	EIF3E (e[1+],max_CLPP=0.01), RSPO2 (e[1-],max_CLPP=0.01)
Cross-ancestry	chr8:108279863:C:T	t	c	7.242e-09	-0.0476	chr8	108279863	0.953515	autoRNFL_q3	chr8:108279912:A:G	108136563	108441555	304.992	8	108279863	0			0	0	0		5	1	5	1	EIF3E	2	EIF3E-chr8:108233672:108234998,EIF3E-chr8:108229195:108234998	1	1	EIF3E (s)	EIF3E (s,max_CLPP=0.01)	EIF3E (s[2+,3-])	EIF3E (s[2+,3-],max_CLPP=0.02)

## Sheet: ECLIPSER_retina_Table1
ECLIPSER output Table 1 of EUR and cross-ancestry meta-analyses loci with retina eQTL
population	eCAVIAR_prob in causal set	CLPP	GWAS_variant	QTL_Type	GWAS_variant(aligned to GTEx)	Tissue	gene	trait	Number variants tested in defined LD interval (r2 0.1 ¬± 50kb)	num_variants_z_score_file	gene_id	qtl_Variant_id	var_chr	var_pos	effect_allele	baseline_allele	QTL_pval_nominal	QTL_slope_relative_ALT	QTL_se	Gene_id_intron_cluster	ID	GWAS_beta_relative_ALT	SEBETA_GC	P	QTL_variant_signif_esQTL	QC_name_QTL_FDR05_P1E04_GWAS_P5E02	Effect allele	Other Allele	GWAS_p_value	GWAS_effect	GWAS_OR	GWAS_Trait	LD_interval_start(b38)	LD_interval_end(b38)	LD_interval_size(kb)	ABS_GWAS_effect	ABS(GWAS_effect)	Qtl_gwas_relative_effect	tmp	Gene_symbol
EUR	0.859978	0.0163217	chr10:68263296:A:G	eQTL	chr10:68263296:A:G	Retina	ENSG00000138347	autoRNFL_q4	443	443	ENSG00000138347	10:68437482:A:T	chr10	68437482	T	A	0.00434825	-0.0796429	0.0277702	ENSG00000138347	chr10:68437482:A:T	0.0154	0.0077	0.04613	FALSE	FALSE	a	g	5.984e-10	-0.0526	0.948759	autoRNFL_q4	68098183	68868604	770.421	0.0526	0.0796429	OPPOSITE	ENSG00000138347	MYPN
EUR	0.982893	0.0356412	chr10:68263296:A:G	eQTL	chr10:68263296:A:G	Retina	ENSG00000122912	autoRNFL_q4	443	443	ENSG00000122912	10:68437482:A:T	chr10	68437482	T	A	1.10477e-06	-0.0647485	0.0130869	ENSG00000122912	chr10:68437482:A:T	0.0154	0.0077	0.04613	FALSE	TRUE	a	g	5.984e-10	-0.0526	0.948759	autoRNFL_q4	68098183	68868604	770.421	0.0526	0.0647485	OPPOSITE	ENSG00000122912	SLC25A16
EUR	0.125688	0.0114045	chr17:81611261:G:A	eQTL	chr17:81611261:G:A	Retina	ENSG00000182612	mocoGCC_q3	552	552	ENSG00000182612	17:81603041:C:T	chr17	81603041	C	T	0.00223379	-0.0504404	0.016393	ENSG00000182612	chr17:81603041:C:T	-0.0268	0.0074	0.0002959	FALSE	FALSE	a	g	7.202e-09	-0.0449	0.956093	mocoGCC_q3	81418853	81779444	360.591	0.0449	0.0504404	SAME	ENSG00000182612	TSPAN10
EUR	0.117618	0.0106723	chr17:81611261:G:A	eQTL	chr17:81611261:G:A	Retina	ENSG00000182612	mocoGCC_q3	552	552	ENSG00000182612	17:81617163:C:T	chr17	81617163	T	C	0.00227233	-0.0503482	0.0163909	ENSG00000182612	chr17:81617163:C:T	-0.0267	0.0074	0.0003055	FALSE	FALSE	a	g	7.202e-09	-0.0449	0.956093	mocoGCC_q3	81418853	81779444	360.591	0.0449	0.0503482	SAME	ENSG00000182612	TSPAN10
EUR	0.112242	0.0101845	chr17:81611261:G:A	eQTL	chr17:81611261:G:A	Retina	ENSG00000182612	mocoGCC_q3	552	552	ENSG00000182612	17:81599293:A:T	chr17	81599293	A	T	0.00219479	-0.0505322	0.0163943	ENSG00000182612	chr17:81599293:A:T	0.0266	0.0074	0.0003369	FALSE	FALSE	a	g	7.202e-09	-0.0449	0.956093	mocoGCC_q3	81418853	81779444	360.591	0.0449	0.0505322	OPPOSITE	ENSG00000182612	TSPAN10
EUR	0.148324	0.0137146	chr17:81611261:G:A	eQTL	chr17:81611261:G:A	Retina	ENSG00000275902	mocoGCC_q3	552	552	ENSG00000275902	17:81599293:A:T	chr17	81599293	A	T	8.36452e-06	-0.0665882	0.0147522	ENSG00000275902	chr17:81599293:A:T	0.0266	0.0074	0.0003369	FALSE	TRUE	a	g	7.202e-09	-0.0449	0.956093	mocoGCC_q3	81418853	81779444	360.591	0.0449	0.0665882	OPPOSITE	ENSG00000275902	RP13-1032I1.11
EUR	0.127225	0.0117636	chr17:81611261:G:A	eQTL	chr17:81611261:G:A	Retina	ENSG00000275902	mocoGCC_q3	552	552	ENSG00000275902	17:81603041:C:T	chr17	81603041	C	T	9.71088e-06	-0.0661122	0.0147557	ENSG00000275902	chr17:81603041:C:T	-0.0268	0.0074	0.0002959	FALSE	TRUE	a	g	7.202e-09	-0.0449	0.956093	mocoGCC_q3	81418853	81779444	360.591	0.0449	0.0661122	SAME	ENSG00000275902	RP13-1032I1.11
EUR	0.125231	0.0115793	chr17:81611261:G:A	eQTL	chr17:81611261:G:A	Retina	ENSG00000275902	mocoGCC_q3	552	552	ENSG00000275902	17:81617163:C:T	chr17	81617163	T	C	9.73091e-06	-0.0660944	0.0147533	ENSG00000275902	chr17:81617163:C:T	-0.0267	0.0074	0.0003055	FALSE	TRUE	a	g	7.202e-09	-0.0449	0.956093	mocoGCC_q3	81418853	81779444	360.591	0.0449	0.0660944	SAME	ENSG00000275902	RP13-1032I1.11
EUR	0.24417	0.0163075	chr17:81611261:G:A	eQTL	chr17:81611261:G:A	Retina	ENSG00000182446	mocoGCC_q3	552	552	ENSG00000182446	17:81559543:C:G	chr17	81559543	C	G	0.200835	-0.00976763	0.00762341	ENSG00000182446	chr17:81559543:C:G	0.0293	0.0076	0.0001171	FALSE	FALSE	a	g	7.202e-09	-0.0449	0.956093	mocoGCC_q3	81418853	81779444	360.591	0.0449	0.00976763	OPPOSITE	ENSG00000182446	NPLOC4
EUR	0.994381	0.0116667	chr10:68253493:C:T	eQTL	chr10:68253493:C:T	Retina	ENSG00000122912	autoRNFL_q3	516	516	ENSG00000122912	10:68437482:A:T	chr10	68437482	T	A	1.10477e-06	-0.0647485	0.0130869	ENSG00000122912	chr10:68437482:A:T	-0.0151	0.0076	0.04761	FALSE	TRUE	t	c	1.857e-18	-0.0736	0.929043	autoRNFL_q3	68098183	68868604	770.421	0.0736	0.0647485	SAME	ENSG00000122912	SLC25A16
EUR	0.965357	0.0740457	chr10:68263296:A:G	eQTL	chr10:68263296:A:G	Retina	ENSG00000138347	mocoRNFL_q1	498	498	ENSG00000138347	10:68437482:A:T	chr10	68437482	T	A	0.00434825	-0.0796429	0.0277702	ENSG00000138347	chr10:68437482:A:T	0.0218	0.0077	0.004667	FALSE	FALSE	a	g	9.644e-16	-0.0681	0.934167	mocoRNFL_q1	68098183	68868604	770.421	0.0681	0.0796429	OPPOSITE	ENSG00000138347	MYPN
EUR	0.992525	0.068725	chr10:68263296:A:G	eQTL	chr10:68263296:A:G	Retina	ENSG00000138346	mocoRNFL_q1	498	498	ENSG00000138346	10:68437482:A:T	chr10	68437482	T	A	0.00034728	0.0707999	0.0196231	ENSG00000138346	chr10:68437482:A:T	0.0218	0.0077	0.004667	FALSE	FALSE	a	g	9.644e-16	-0.0681	0.934167	mocoRNFL_q1	68098183	68868604	770.421	0.0681	0.0707999	SAME	ENSG00000138346	DNA2
EUR	0.997779	0.171449	chr10:68263296:A:G	eQTL	chr10:68263296:A:G	Retina	ENSG00000122912	mocoRNFL_q1	498	498	ENSG00000122912	10:68437482:A:T	chr10	68437482	T	A	1.10477e-06	-0.0647485	0.0130869	ENSG00000122912	chr10:68437482:A:T	0.0218	0.0077	0.004667	FALSE	TRUE	a	g	9.644e-16	-0.0681	0.934167	mocoRNFL_q1	68098183	68868604	770.421	0.0681	0.0647485	OPPOSITE	ENSG00000122912	SLC25A16
EUR	0.999968	0.624424	chr10:68263296:A:G	eQTL	chr10:68263296:A:G	Retina	ENSG00000122912	autoRNFL_q6	550	550	ENSG00000122912	10:68437482:A:T	chr10	68437482	T	A	1.10477e-06	-0.0647485	0.0130869	ENSG00000122912	chr10:68437482:A:T	0.0242	0.0077	0.001739	FALSE	TRUE	a	g	4.624e-25	-0.0877	0.916036	autoRNFL_q6	68098183	68868604	770.421	0.0877	0.0647485	OPPOSITE	ENSG00000122912	SLC25A16
EUR	0.167075	0.0157809	chr17:81619201:TA:T	eQTL	chr17:81619201:TA:T	Retina	ENSG00000182612	autoGCC_q6	552	552	ENSG00000182612	17:81625626:A:G	chr17	81625626	G	A	0.00227233	-0.0503482	0.0163909	ENSG00000182612	chr17:81625626:A:G	0.038	0.0075	4.288e-07	FALSE	FALSE	t	ta	4.088e-10	-0.0493	0.951896	autoGCC_q6	81418853	81779444	360.591	0.0493	0.0503482	OPPOSITE	ENSG00000182612	TSPAN10
EUR	0.140966	0.0133148	chr17:81619201:TA:T	eQTL	chr17:81619201:TA:T	Retina	ENSG00000182612	autoGCC_q6	552	552	ENSG00000182612	17:81630557:A:C	chr17	81630557	C	A	0.00226988	-0.0503538	0.016391	ENSG00000182612	chr17:81630557:A:C	0.0379	0.0075	4.442e-07	FALSE	FALSE	t	ta	4.088e-10	-0.0493	0.951896	autoGCC_q6	81418853	81779444	360.591	0.0493	0.0503538	OPPOSITE	ENSG00000182612	TSPAN10
EUR	0.118525	0.0111952	chr17:81619201:TA:T	eQTL	chr17:81619201:TA:T	Retina	ENSG00000182612	autoGCC_q6	552	552	ENSG00000182612	17:81624787:C:T	chr17	81624787	T	C	0.00229097	-0.0503183	0.0163945	ENSG00000182612	chr17:81624787:C:T	-0.0378	0.0075	4.898e-07	FALSE	FALSE	t	ta	4.088e-10	-0.0493	0.951896	autoGCC_q6	81418853	81779444	360.591	0.0493	0.0503183	SAME	ENSG00000182612	TSPAN10
EUR	0.113844	0.010753	chr17:81619201:TA:T	eQTL	chr17:81619201:TA:T	Retina	ENSG00000182612	autoGCC_q6	552	552	ENSG00000182612	17:81640574:A:G	chr17	81640574	G	A	0.00224602	-0.0504132	0.0163931	ENSG00000182612	chr17:81640574:A:G	0.0377	0.0075	5.431e-07	FALSE	FALSE	t	ta	4.088e-10	-0.0493	0.951896	autoGCC_q6	81418853	81779444	360.591	0.0493	0.0504132	OPPOSITE	ENSG00000182612	TSPAN10
EUR	0.107087	0.0101148	chr17:81619201:TA:T	eQTL	chr17:81619201:TA:T	Retina	ENSG00000182612	autoGCC_q6	552	552	ENSG00000182612	17:81634830:A:G	chr17	81634830	G	A	0.00225978	-0.0503792	0.016392	ENSG00000182612	chr17:81634830:A:G	0.0377	0.0075	5.385e-07	FALSE	FALSE	t	ta	4.088e-10	-0.0493	0.951896	autoGCC_q6	81418853	81779444	360.591	0.0493	0.0503792	OPPOSITE	ENSG00000182612	TSPAN10
EUR	0.167808	0.0171633	chr17:81619201:TA:T	eQTL	chr17:81619201:TA:T	Retina	ENSG00000275902	autoGCC_q6	552	552	ENSG00000275902	17:81625626:A:G	chr17	81625626	G	A	9.73091e-06	-0.0660944	0.0147533	ENSG00000275902	chr17:81625626:A:G	0.038	0.0075	4.288e-07	FALSE	TRUE	t	ta	4.088e-10	-0.0493	0.951896	autoGCC_q6	81418853	81779444	360.591	0.0493	0.0660944	OPPOSITE	ENSG00000275902	RP13-1032I1.11
EUR	0.140991	0.0144205	chr17:81619201:TA:T	eQTL	chr17:81619201:TA:T	Retina	ENSG00000275902	autoGCC_q6	552	552	ENSG00000275902	17:81630557:A:C	chr17	81630557	C	A	9.73869e-06	-0.0660924	0.0147534	ENSG00000275902	chr17:81630557:A:C	0.0379	0.0075	4.442e-07	FALSE	TRUE	t	ta	4.088e-10	-0.0493	0.951896	autoGCC_q6	81418853	81779444	360.591	0.0493	0.0660924	OPPOSITE	ENSG00000275902	RP13-1032I1.11
EUR	0.122574	0.0125368	chr17:81619201:TA:T	eQTL	chr17:81619201:TA:T	Retina	ENSG00000275902	autoGCC_q6	552	552	ENSG00000275902	17:81624787:C:T	chr17	81624787	T	C	9.67084e-06	-0.0661273	0.014756	ENSG00000275902	chr17:81624787:C:T	-0.0378	0.0075	4.898e-07	FALSE	TRUE	t	ta	4.088e-10	-0.0493	0.951896	autoGCC_q6	81418853	81779444	360.591	0.0493	0.0661273	SAME	ENSG00000275902	RP13-1032I1.11
EUR	0.111627	0.0114171	chr17:81619201:TA:T	eQTL	chr17:81619201:TA:T	Retina	ENSG00000275902	autoGCC_q6	552	552	ENSG00000275902	17:81640574:A:G	chr17	81640574	G	A	9.84335e-06	-0.0660689	0.014756	ENSG00000275902	chr17:81640574:A:G	0.0377	0.0075	5.431e-07	FALSE	TRUE	t	ta	4.088e-10	-0.0493	0.951896	autoGCC_q6	81418853	81779444	360.591	0.0493	0.0660689	OPPOSITE	ENSG00000275902	RP13-1032I1.11
EUR	0.105658	0.0108066	chr17:81619201:TA:T	eQTL	chr17:81619201:TA:T	Retina	ENSG00000275902	autoGCC_q6	552	552	ENSG00000275902	17:81634830:A:G	chr17	81634830	G	A	9.78492e-06	-0.0660822	0.0147546	ENSG00000275902	chr17:81634830:A:G	0.0377	0.0075	5.385e-07	FALSE	TRUE	t	ta	4.088e-10	-0.0493	0.951896	autoGCC_q6	81418853	81779444	360.591	0.0493	0.0660822	OPPOSITE	ENSG00000275902	RP13-1032I1.11
EUR	0.102109	0.0104437	chr17:81619201:TA:T	eQTL	chr17:81619201:TA:T	Retina	ENSG00000275902	autoGCC_q6	552	552	ENSG00000275902	17:81617163:C:T	chr17	81617163	T	C	9.73091e-06	-0.0660944	0.0147533	ENSG00000275902	chr17:81617163:C:T	-0.0377	0.0075	5.264e-07	FALSE	TRUE	t	ta	4.088e-10	-0.0493	0.951896	autoGCC_q6	81418853	81779444	360.591	0.0493	0.0660944	SAME	ENSG00000275902	RP13-1032I1.11
EUR	0.213093	0.0217976	chr17:81562724:G:A	eQTL	chr17:81562724:G:A	Retina	ENSG00000275902	autoGCC_q8	558	558	ENSG00000275902	17:81640574:A:G	chr17	81640574	G	A	9.84335e-06	-0.0660689	0.014756	ENSG00000275902	chr17:81640574:A:G	0.0437	0.0074	4.399e-09	FALSE	TRUE	a	g	1.015e-08	0.0663	1.06855	autoGCC_q8	81413132	81772846	359.714	0.0663	0.0660689	OPPOSITE	ENSG00000275902	RP13-1032I1.11
EUR	0.13867	0.0141848	chr17:81562724:G:A	eQTL	chr17:81562724:G:A	Retina	ENSG00000275902	autoGCC_q8	558	558	ENSG00000275902	17:81617163:C:T	chr17	81617163	T	C	9.73091e-06	-0.0660944	0.0147533	ENSG00000275902	chr17:81617163:C:T	-0.0438	0.0074	4.049e-09	FALSE	TRUE	a	g	1.015e-08	0.0663	1.06855	autoGCC_q8	81413132	81772846	359.714	0.0663	0.0660944	SAME	ENSG00000275902	RP13-1032I1.11
EUR	0.124995	0.012786	chr17:81562724:G:A	eQTL	chr17:81562724:G:A	Retina	ENSG00000275902	autoGCC_q8	558	558	ENSG00000275902	17:81625626:A:G	chr17	81625626	G	A	9.73091e-06	-0.0660944	0.0147533	ENSG00000275902	chr17:81625626:A:G	0.0437	0.0074	4.532e-09	FALSE	TRUE	a	g	1.015e-08	0.0663	1.06855	autoGCC_q8	81413132	81772846	359.714	0.0663	0.0660944	OPPOSITE	ENSG00000275902	RP13-1032I1.11
EUR	0.123715	0.012655	chr17:81562724:G:A	eQTL	chr17:81562724:G:A	Retina	ENSG00000275902	autoGCC_q8	558	558	ENSG00000275902	17:81624787:C:T	chr17	81624787	T	C	9.67084e-06	-0.0661273	0.014756	ENSG00000275902	chr17:81624787:C:T	-0.0437	0.0074	4.457e-09	FALSE	TRUE	a	g	1.015e-08	0.0663	1.06855	autoGCC_q8	81413132	81772846	359.714	0.0663	0.0661273	SAME	ENSG00000275902	RP13-1032I1.11
EUR	0.121644	0.0124432	chr17:81562724:G:A	eQTL	chr17:81562724:G:A	Retina	ENSG00000275902	autoGCC_q8	558	558	ENSG00000275902	17:81634830:A:G	chr17	81634830	G	A	9.78492e-06	-0.0660822	0.0147546	ENSG00000275902	chr17:81634830:A:G	0.0436	0.0074	4.721e-09	FALSE	TRUE	a	g	1.015e-08	0.0663	1.06855	autoGCC_q8	81413132	81772846	359.714	0.0663	0.0660822	OPPOSITE	ENSG00000275902	RP13-1032I1.11
EUR	0.101637	0.0103966	chr17:81562724:G:A	eQTL	chr17:81562724:G:A	Retina	ENSG00000275902	autoGCC_q8	558	558	ENSG00000275902	17:81630557:A:C	chr17	81630557	C	A	9.73869e-06	-0.0660924	0.0147534	ENSG00000275902	chr17:81630557:A:C	0.0436	0.0074	4.916e-09	FALSE	TRUE	a	g	1.015e-08	0.0663	1.06855	autoGCC_q8	81413132	81772846	359.714	0.0663	0.0660924	OPPOSITE	ENSG00000275902	RP13-1032I1.11
EUR	0.203314	0.0106915	chr17:81562724:G:A	eQTL	chr17:81562724:G:A	Retina	ENSG00000182446	autoGCC_q8	558	558	ENSG00000182446	17:81640574:A:G	chr17	81640574	G	A	0.348123	-0.00696047	0.00741004	ENSG00000182446	chr17:81640574:A:G	0.0437	0.0074	4.399e-09	FALSE	FALSE	a	g	1.015e-08	0.0663	1.06855	autoGCC_q8	81413132	81772846	359.714	0.0663	0.00696047	OPPOSITE	ENSG00000182446	NPLOC4
EUR	0.2155	0.0205298	chr17:81562724:G:A	eQTL	chr17:81562724:G:A	Retina	ENSG00000182612	autoGCC_q8	558	558	ENSG00000182612	17:81640574:A:G	chr17	81640574	G	A	0.00224602	-0.0504132	0.0163931	ENSG00000182612	chr17:81640574:A:G	0.0437	0.0074	4.399e-09	FALSE	FALSE	a	g	1.015e-08	0.0663	1.06855	autoGCC_q8	81413132	81772846	359.714	0.0663	0.0504132	OPPOSITE	ENSG00000182612	TSPAN10
EUR	0.137234	0.0130737	chr17:81562724:G:A	eQTL	chr17:81562724:G:A	Retina	ENSG00000182612	autoGCC_q8	558	558	ENSG00000182612	17:81617163:C:T	chr17	81617163	T	C	0.00227233	-0.0503482	0.0163909	ENSG00000182612	chr17:81617163:C:T	-0.0438	0.0074	4.049e-09	FALSE	FALSE	a	g	1.015e-08	0.0663	1.06855	autoGCC_q8	81413132	81772846	359.714	0.0663	0.0503482	SAME	ENSG00000182612	TSPAN10
EUR	0.123403	0.0117561	chr17:81562724:G:A	eQTL	chr17:81562724:G:A	Retina	ENSG00000182612	autoGCC_q8	558	558	ENSG00000182612	17:81625626:A:G	chr17	81625626	G	A	0.00227233	-0.0503482	0.0163909	ENSG00000182612	chr17:81625626:A:G	0.0437	0.0074	4.532e-09	FALSE	FALSE	a	g	1.015e-08	0.0663	1.06855	autoGCC_q8	81413132	81772846	359.714	0.0663	0.0503482	OPPOSITE	ENSG00000182612	TSPAN10
EUR	0.122254	0.0116466	chr17:81562724:G:A	eQTL	chr17:81562724:G:A	Retina	ENSG00000182612	autoGCC_q8	558	558	ENSG00000182612	17:81634830:A:G	chr17	81634830	G	A	0.00225978	-0.0503792	0.016392	ENSG00000182612	chr17:81634830:A:G	0.0436	0.0074	4.721e-09	FALSE	FALSE	a	g	1.015e-08	0.0663	1.06855	autoGCC_q8	81413132	81772846	359.714	0.0663	0.0503792	OPPOSITE	ENSG00000182612	TSPAN10
EUR	0.118623	0.0113007	chr17:81562724:G:A	eQTL	chr17:81562724:G:A	Retina	ENSG00000182612	autoGCC_q8	558	558	ENSG00000182612	17:81624787:C:T	chr17	81624787	T	C	0.00229097	-0.0503183	0.0163945	ENSG00000182612	chr17:81624787:C:T	-0.0437	0.0074	4.457e-09	FALSE	FALSE	a	g	1.015e-08	0.0663	1.06855	autoGCC_q8	81413132	81772846	359.714	0.0663	0.0503183	SAME	ENSG00000182612	TSPAN10
EUR	0.213093	0.0217976	chr17:81647906:TTAAC:T	eQTL	chr17:81647906:T:TTAAC	Retina	ENSG00000275902	autoGCC_q8	552	552	ENSG00000275902	17:81640574:A:G	chr17	81640574	G	A	9.84335e-06	-0.0660689	0.014756	ENSG00000275902	chr17:81640574:A:G	0.0437	0.0074	4.399e-09	FALSE	TRUE	t	ttaac	1.711e-15	-0.0621	0.939789	autoGCC_q8	81418853	81779444	360.591	0.0621	0.0660689	OPPOSITE	ENSG00000275902	RP13-1032I1.11
EUR	0.13867	0.0141848	chr17:81647906:TTAAC:T	eQTL	chr17:81647906:T:TTAAC	Retina	ENSG00000275902	autoGCC_q8	552	552	ENSG00000275902	17:81617163:C:T	chr17	81617163	T	C	9.73091e-06	-0.0660944	0.0147533	ENSG00000275902	chr17:81617163:C:T	-0.0438	0.0074	4.049e-09	FALSE	TRUE	t	ttaac	1.711e-15	-0.0621	0.939789	autoGCC_q8	81418853	81779444	360.591	0.0621	0.0660944	SAME	ENSG00000275902	RP13-1032I1.11
EUR	0.124995	0.012786	chr17:81647906:TTAAC:T	eQTL	chr17:81647906:T:TTAAC	Retina	ENSG00000275902	autoGCC_q8	552	552	ENSG00000275902	17:81625626:A:G	chr17	81625626	G	A	9.73091e-06	-0.0660944	0.0147533	ENSG00000275902	chr17:81625626:A:G	0.0437	0.0074	4.532e-09	FALSE	TRUE	t	ttaac	1.711e-15	-0.0621	0.939789	autoGCC_q8	81418853	81779444	360.591	0.0621	0.0660944	OPPOSITE	ENSG00000275902	RP13-1032I1.11
EUR	0.123715	0.012655	chr17:81647906:TTAAC:T	eQTL	chr17:81647906:T:TTAAC	Retina	ENSG00000275902	autoGCC_q8	552	552	ENSG00000275902	17:81624787:C:T	chr17	81624787	T	C	9.67084e-06	-0.0661273	0.014756	ENSG00000275902	chr17:81624787:C:T	-0.0437	0.0074	4.457e-09	FALSE	TRUE	t	ttaac	1.711e-15	-0.0621	0.939789	autoGCC_q8	81418853	81779444	360.591	0.0621	0.0661273	SAME	ENSG00000275902	RP13-1032I1.11
EUR	0.121644	0.0124432	chr17:81647906:TTAAC:T	eQTL	chr17:81647906:T:TTAAC	Retina	ENSG00000275902	autoGCC_q8	552	552	ENSG00000275902	17:81634830:A:G	chr17	81634830	G	A	9.78492e-06	-0.0660822	0.0147546	ENSG00000275902	chr17:81634830:A:G	0.0436	0.0074	4.721e-09	FALSE	TRUE	t	ttaac	1.711e-15	-0.0621	0.939789	autoGCC_q8	81418853	81779444	360.591	0.0621	0.0660822	OPPOSITE	ENSG00000275902	RP13-1032I1.11
EUR	0.101637	0.0103966	chr17:81647906:TTAAC:T	eQTL	chr17:81647906:T:TTAAC	Retina	ENSG00000275902	autoGCC_q8	552	552	ENSG00000275902	17:81630557:A:C	chr17	81630557	C	A	9.73869e-06	-0.0660924	0.0147534	ENSG00000275902	chr17:81630557:A:C	0.0436	0.0074	4.916e-09	FALSE	TRUE	t	ttaac	1.711e-15	-0.0621	0.939789	autoGCC_q8	81418853	81779444	360.591	0.0621	0.0660924	OPPOSITE	ENSG00000275902	RP13-1032I1.11
EUR	0.203314	0.0106919	chr17:81647906:TTAAC:T	eQTL	chr17:81647906:T:TTAAC	Retina	ENSG00000182446	autoGCC_q8	552	552	ENSG00000182446	17:81640574:A:G	chr17	81640574	G	A	0.348123	-0.00696047	0.00741004	ENSG00000182446	chr17:81640574:A:G	0.0437	0.0074	4.399e-09	FALSE	FALSE	t	ttaac	1.711e-15	-0.0621	0.939789	autoGCC_q8	81418853	81779444	360.591	0.0621	0.00696047	OPPOSITE	ENSG00000182446	NPLOC4
EUR	0.2155	0.0205298	chr17:81647906:TTAAC:T	eQTL	chr17:81647906:T:TTAAC	Retina	ENSG00000182612	autoGCC_q8	552	552	ENSG00000182612	17:81640574:A:G	chr17	81640574	G	A	0.00224602	-0.0504132	0.0163931	ENSG00000182612	chr17:81640574:A:G	0.0437	0.0074	4.399e-09	FALSE	FALSE	t	ttaac	1.711e-15	-0.0621	0.939789	autoGCC_q8	81418853	81779444	360.591	0.0621	0.0504132	OPPOSITE	ENSG00000182612	TSPAN10
EUR	0.137234	0.0130737	chr17:81647906:TTAAC:T	eQTL	chr17:81647906:T:TTAAC	Retina	ENSG00000182612	autoGCC_q8	552	552	ENSG00000182612	17:81617163:C:T	chr17	81617163	T	C	0.00227233	-0.0503482	0.0163909	ENSG00000182612	chr17:81617163:C:T	-0.0438	0.0074	4.049e-09	FALSE	FALSE	t	ttaac	1.711e-15	-0.0621	0.939789	autoGCC_q8	81418853	81779444	360.591	0.0621	0.0503482	SAME	ENSG00000182612	TSPAN10
EUR	0.123403	0.0117561	chr17:81647906:TTAAC:T	eQTL	chr17:81647906:T:TTAAC	Retina	ENSG00000182612	autoGCC_q8	552	552	ENSG00000182612	17:81625626:A:G	chr17	81625626	G	A	0.00227233	-0.0503482	0.0163909	ENSG00000182612	chr17:81625626:A:G	0.0437	0.0074	4.532e-09	FALSE	FALSE	t	ttaac	1.711e-15	-0.0621	0.939789	autoGCC_q8	81418853	81779444	360.591	0.0621	0.0503482	OPPOSITE	ENSG00000182612	TSPAN10
EUR	0.122254	0.0116466	chr17:81647906:TTAAC:T	eQTL	chr17:81647906:T:TTAAC	Retina	ENSG00000182612	autoGCC_q8	552	552	ENSG00000182612	17:81634830:A:G	chr17	81634830	G	A	0.00225978	-0.0503792	0.016392	ENSG00000182612	chr17:81634830:A:G	0.0436	0.0074	4.721e-09	FALSE	FALSE	t	ttaac	1.711e-15	-0.0621	0.939789	autoGCC_q8	81418853	81779444	360.591	0.0621	0.0503792	OPPOSITE	ENSG00000182612	TSPAN10
EUR	0.118623	0.0113007	chr17:81647906:TTAAC:T	eQTL	chr17:81647906:T:TTAAC	Retina	ENSG00000182612	autoGCC_q8	552	552	ENSG00000182612	17:81624787:C:T	chr17	81624787	T	C	0.00229097	-0.0503183	0.0163945	ENSG00000182612	chr17:81624787:C:T	-0.0437	0.0074	4.457e-09	FALSE	FALSE	t	ttaac	1.711e-15	-0.0621	0.939789	autoGCC_q8	81418853	81779444	360.591	0.0621	0.0503183	SAME	ENSG00000182612	TSPAN10
EUR	0.313479	0.0303259	chr17:81562724:G:A	eQTL	chr17:81562724:G:A	Retina	ENSG00000182612	autoGCC_q3	558	558	ENSG00000182612	17:81640574:A:G	chr17	81640574	G	A	0.00224602	-0.0504132	0.0163931	ENSG00000182612	chr17:81640574:A:G	-0.0559	0.0075	6.565e-14	FALSE	FALSE	a	g	1.608e-11	-0.0781	0.924872	autoGCC_q3	81413132	81772846	359.714	0.0781	0.0504132	SAME	ENSG00000182612	TSPAN10
EUR	0.185523	0.0179475	chr17:81562724:G:A	eQTL	chr17:81562724:G:A	Retina	ENSG00000182612	autoGCC_q3	558	558	ENSG00000182612	17:81634830:A:G	chr17	81634830	G	A	0.00225978	-0.0503792	0.016392	ENSG00000182612	chr17:81634830:A:G	-0.0559	0.0075	6.355e-14	FALSE	FALSE	a	g	1.608e-11	-0.0781	0.924872	autoGCC_q3	81413132	81772846	359.714	0.0781	0.0503792	SAME	ENSG00000182612	TSPAN10
EUR	0.111689	0.0108048	chr17:81562724:G:A	eQTL	chr17:81562724:G:A	Retina	ENSG00000182612	autoGCC_q3	558	558	ENSG00000182612	17:81625626:A:G	chr17	81625626	G	A	0.00227233	-0.0503482	0.0163909	ENSG00000182612	chr17:81625626:A:G	-0.0558	0.0075	7.016e-14	FALSE	FALSE	a	g	1.608e-11	-0.0781	0.924872	autoGCC_q3	81413132	81772846	359.714	0.0781	0.0503482	SAME	ENSG00000182612	TSPAN10
EUR	0.110613	0.0107007	chr17:81562724:G:A	eQTL	chr17:81562724:G:A	Retina	ENSG00000182612	autoGCC_q3	558	558	ENSG00000182612	17:81630557:A:C	chr17	81630557	C	A	0.00226988	-0.0503538	0.016391	ENSG00000182612	chr17:81630557:A:C	-0.0558	0.0075	7.266e-14	FALSE	FALSE	a	g	1.608e-11	-0.0781	0.924872	autoGCC_q3	81413132	81772846	359.714	0.0781	0.0503538	SAME	ENSG00000182612	TSPAN10
EUR	0.106384	0.0102916	chr17:81562724:G:A	eQTL	chr17:81562724:G:A	Retina	ENSG00000182612	autoGCC_q3	558	558	ENSG00000182612	17:81624787:C:T	chr17	81624787	T	C	0.00229097	-0.0503183	0.0163945	ENSG00000182612	chr17:81624787:C:T	0.0558	0.0075	7.33e-14	FALSE	FALSE	a	g	1.608e-11	-0.0781	0.924872	autoGCC_q3	81413132	81772846	359.714	0.0781	0.0503183	OPPOSITE	ENSG00000182612	TSPAN10
EUR	0.309241	0.0321988	chr17:81562724:G:A	eQTL	chr17:81562724:G:A	Retina	ENSG00000275902	autoGCC_q3	558	558	ENSG00000275902	17:81640574:A:G	chr17	81640574	G	A	9.84335e-06	-0.0660689	0.014756	ENSG00000275902	chr17:81640574:A:G	-0.0559	0.0075	6.565e-14	FALSE	TRUE	a	g	1.608e-11	-0.0781	0.924872	autoGCC_q3	81413132	81772846	359.714	0.0781	0.0660689	SAME	ENSG00000275902	RP13-1032I1.11
EUR	0.184159	0.0191751	chr17:81562724:G:A	eQTL	chr17:81562724:G:A	Retina	ENSG00000275902	autoGCC_q3	558	558	ENSG00000275902	17:81634830:A:G	chr17	81634830	G	A	9.78492e-06	-0.0660822	0.0147546	ENSG00000275902	chr17:81634830:A:G	-0.0559	0.0075	6.355e-14	FALSE	TRUE	a	g	1.608e-11	-0.0781	0.924872	autoGCC_q3	81413132	81772846	359.714	0.0781	0.0660822	SAME	ENSG00000275902	RP13-1032I1.11
EUR	0.112861	0.0117513	chr17:81562724:G:A	eQTL	chr17:81562724:G:A	Retina	ENSG00000275902	autoGCC_q3	558	558	ENSG00000275902	17:81625626:A:G	chr17	81625626	G	A	9.73091e-06	-0.0660944	0.0147533	ENSG00000275902	chr17:81625626:A:G	-0.0558	0.0075	7.016e-14	FALSE	TRUE	a	g	1.608e-11	-0.0781	0.924872	autoGCC_q3	81413132	81772846	359.714	0.0781	0.0660944	SAME	ENSG00000275902	RP13-1032I1.11
EUR	0.111305	0.0115893	chr17:81562724:G:A	eQTL	chr17:81562724:G:A	Retina	ENSG00000275902	autoGCC_q3	558	558	ENSG00000275902	17:81630557:A:C	chr17	81630557	C	A	9.73869e-06	-0.0660924	0.0147534	ENSG00000275902	chr17:81630557:A:C	-0.0558	0.0075	7.266e-14	FALSE	TRUE	a	g	1.608e-11	-0.0781	0.924872	autoGCC_q3	81413132	81772846	359.714	0.0781	0.0660924	SAME	ENSG00000275902	RP13-1032I1.11
EUR	0.110687	0.011525	chr17:81562724:G:A	eQTL	chr17:81562724:G:A	Retina	ENSG00000275902	autoGCC_q3	558	558	ENSG00000275902	17:81624787:C:T	chr17	81624787	T	C	9.67084e-06	-0.0661273	0.014756	ENSG00000275902	chr17:81624787:C:T	0.0558	0.0075	7.33e-14	FALSE	TRUE	a	g	1.608e-11	-0.0781	0.924872	autoGCC_q3	81413132	81772846	359.714	0.0781	0.0661273	OPPOSITE	ENSG00000275902	RP13-1032I1.11
EUR	0.0984963	0.0102556	chr17:81562724:G:A	eQTL	chr17:81562724:G:A	Retina	ENSG00000275902	autoGCC_q3	558	558	ENSG00000275902	17:81617163:C:T	chr17	81617163	T	C	9.73091e-06	-0.0660944	0.0147533	ENSG00000275902	chr17:81617163:C:T	0.0558	0.0075	7.307e-14	FALSE	TRUE	a	g	1.608e-11	-0.0781	0.924872	autoGCC_q3	81413132	81772846	359.714	0.0781	0.0660944	OPPOSITE	ENSG00000275902	RP13-1032I1.11
EUR	0.299451	0.0157931	chr17:81562724:G:A	eQTL	chr17:81562724:G:A	Retina	ENSG00000182446	autoGCC_q3	558	558	ENSG00000182446	17:81640574:A:G	chr17	81640574	G	A	0.348123	-0.00696047	0.00741004	ENSG00000182446	chr17:81640574:A:G	-0.0559	0.0075	6.565e-14	FALSE	FALSE	a	g	1.608e-11	-0.0781	0.924872	autoGCC_q3	81413132	81772846	359.714	0.0781	0.00696047	SAME	ENSG00000182446	NPLOC4
EUR	0.313479	0.0303259	chr17:81647906:TTAAC:T	eQTL	chr17:81647906:T:TTAAC	Retina	ENSG00000182612	autoGCC_q3	552	552	ENSG00000182612	17:81640574:A:G	chr17	81640574	G	A	0.00224602	-0.0504132	0.0163931	ENSG00000182612	chr17:81640574:A:G	-0.0559	0.0075	6.565e-14	FALSE	FALSE	t	ttaac	8.44e-22	0.075	1.07788	autoGCC_q3	81418853	81779444	360.591	0.075	0.0504132	SAME	ENSG00000182612	TSPAN10
EUR	0.185523	0.0179475	chr17:81647906:TTAAC:T	eQTL	chr17:81647906:T:TTAAC	Retina	ENSG00000182612	autoGCC_q3	552	552	ENSG00000182612	17:81634830:A:G	chr17	81634830	G	A	0.00225978	-0.0503792	0.016392	ENSG00000182612	chr17:81634830:A:G	-0.0559	0.0075	6.355e-14	FALSE	FALSE	t	ttaac	8.44e-22	0.075	1.07788	autoGCC_q3	81418853	81779444	360.591	0.075	0.0503792	SAME	ENSG00000182612	TSPAN10
EUR	0.111689	0.0108048	chr17:81647906:TTAAC:T	eQTL	chr17:81647906:T:TTAAC	Retina	ENSG00000182612	autoGCC_q3	552	552	ENSG00000182612	17:81625626:A:G	chr17	81625626	G	A	0.00227233	-0.0503482	0.0163909	ENSG00000182612	chr17:81625626:A:G	-0.0558	0.0075	7.016e-14	FALSE	FALSE	t	ttaac	8.44e-22	0.075	1.07788	autoGCC_q3	81418853	81779444	360.591	0.075	0.0503482	SAME	ENSG00000182612	TSPAN10
EUR	0.110613	0.0107007	chr17:81647906:TTAAC:T	eQTL	chr17:81647906:T:TTAAC	Retina	ENSG00000182612	autoGCC_q3	552	552	ENSG00000182612	17:81630557:A:C	chr17	81630557	C	A	0.00226988	-0.0503538	0.016391	ENSG00000182612	chr17:81630557:A:C	-0.0558	0.0075	7.266e-14	FALSE	FALSE	t	ttaac	8.44e-22	0.075	1.07788	autoGCC_q3	81418853	81779444	360.591	0.075	0.0503538	SAME	ENSG00000182612	TSPAN10
EUR	0.106384	0.0102916	chr17:81647906:TTAAC:T	eQTL	chr17:81647906:T:TTAAC	Retina	ENSG00000182612	autoGCC_q3	552	552	ENSG00000182612	17:81624787:C:T	chr17	81624787	T	C	0.00229097	-0.0503183	0.0163945	ENSG00000182612	chr17:81624787:C:T	0.0558	0.0075	7.33e-14	FALSE	FALSE	t	ttaac	8.44e-22	0.075	1.07788	autoGCC_q3	81418853	81779444	360.591	0.075	0.0503183	OPPOSITE	ENSG00000182612	TSPAN10
EUR	0.309241	0.0321988	chr17:81647906:TTAAC:T	eQTL	chr17:81647906:T:TTAAC	Retina	ENSG00000275902	autoGCC_q3	552	552	ENSG00000275902	17:81640574:A:G	chr17	81640574	G	A	9.84335e-06	-0.0660689	0.014756	ENSG00000275902	chr17:81640574:A:G	-0.0559	0.0075	6.565e-14	FALSE	TRUE	t	ttaac	8.44e-22	0.075	1.07788	autoGCC_q3	81418853	81779444	360.591	0.075	0.0660689	SAME	ENSG00000275902	RP13-1032I1.11
EUR	0.184159	0.0191751	chr17:81647906:TTAAC:T	eQTL	chr17:81647906:T:TTAAC	Retina	ENSG00000275902	autoGCC_q3	552	552	ENSG00000275902	17:81634830:A:G	chr17	81634830	G	A	9.78492e-06	-0.0660822	0.0147546	ENSG00000275902	chr17:81634830:A:G	-0.0559	0.0075	6.355e-14	FALSE	TRUE	t	ttaac	8.44e-22	0.075	1.07788	autoGCC_q3	81418853	81779444	360.591	0.075	0.0660822	SAME	ENSG00000275902	RP13-1032I1.11
EUR	0.112861	0.0117513	chr17:81647906:TTAAC:T	eQTL	chr17:81647906:T:TTAAC	Retina	ENSG00000275902	autoGCC_q3	552	552	ENSG00000275902	17:81625626:A:G	chr17	81625626	G	A	9.73091e-06	-0.0660944	0.0147533	ENSG00000275902	chr17:81625626:A:G	-0.0558	0.0075	7.016e-14	FALSE	TRUE	t	ttaac	8.44e-22	0.075	1.07788	autoGCC_q3	81418853	81779444	360.591	0.075	0.0660944	SAME	ENSG00000275902	RP13-1032I1.11
EUR	0.111305	0.0115893	chr17:81647906:TTAAC:T	eQTL	chr17:81647906:T:TTAAC	Retina	ENSG00000275902	autoGCC_q3	552	552	ENSG00000275902	17:81630557:A:C	chr17	81630557	C	A	9.73869e-06	-0.0660924	0.0147534	ENSG00000275902	chr17:81630557:A:C	-0.0558	0.0075	7.266e-14	FALSE	TRUE	t	ttaac	8.44e-22	0.075	1.07788	autoGCC_q3	81418853	81779444	360.591	0.075	0.0660924	SAME	ENSG00000275902	RP13-1032I1.11
EUR	0.110687	0.011525	chr17:81647906:TTAAC:T	eQTL	chr17:81647906:T:TTAAC	Retina	ENSG00000275902	autoGCC_q3	552	552	ENSG00000275902	17:81624787:C:T	chr17	81624787	T	C	9.67084e-06	-0.0661273	0.014756	ENSG00000275902	chr17:81624787:C:T	0.0558	0.0075	7.33e-14	FALSE	TRUE	t	ttaac	8.44e-22	0.075	1.07788	autoGCC_q3	81418853	81779444	360.591	0.075	0.0661273	OPPOSITE	ENSG00000275902	RP13-1032I1.11
EUR	0.0984963	0.0102556	chr17:81647906:TTAAC:T	eQTL	chr17:81647906:T:TTAAC	Retina	ENSG00000275902	autoGCC_q3	552	552	ENSG00000275902	17:81617163:C:T	chr17	81617163	T	C	9.73091e-06	-0.0660944	0.0147533	ENSG00000275902	chr17:81617163:C:T	0.0558	0.0075	7.307e-14	FALSE	TRUE	t	ttaac	8.44e-22	0.075	1.07788	autoGCC_q3	81418853	81779444	360.591	0.075	0.0660944	OPPOSITE	ENSG00000275902	RP13-1032I1.11
EUR	0.299451	0.0157938	chr17:81647906:TTAAC:T	eQTL	chr17:81647906:T:TTAAC	Retina	ENSG00000182446	autoGCC_q3	552	552	ENSG00000182446	17:81640574:A:G	chr17	81640574	G	A	0.348123	-0.00696047	0.00741004	ENSG00000182446	chr17:81640574:A:G	-0.0559	0.0075	6.565e-14	FALSE	FALSE	t	ttaac	8.44e-22	0.075	1.07788	autoGCC_q3	81418853	81779444	360.591	0.075	0.00696047	SAME	ENSG00000182446	NPLOC4
EUR	0.533008	0.320714	chr14:59270382:G:A	eQTL	chr14:59270382:G:A	Retina	ENSG00000126790	autoGCC_q2	281	281	ENSG00000126790	14:59439312:C:T	chr14	59439312	C	T	3.6883e-25	-0.180382	0.0162537	ENSG00000126790	chr14:59439312:C:T	-0.0183	0.0075	0.01436	FALSE	TRUE	a	g	1.436e-08	-0.0577	0.943933	autoGCC_q2	58935814	59617355	681.541	0.0577	0.180382	SAME	ENSG00000126790	L3HYPDH
EUR	0.296995	0.178704	chr14:59270382:G:A	eQTL	chr14:59270382:G:A	Retina	ENSG00000126790	autoGCC_q2	281	281	ENSG00000126790	14:59436386:A:C	chr14	59436386	A	C	3.70779e-25	-0.180369	0.0162535	ENSG00000126790	chr14:59436386:A:C	0.0179	0.0075	0.01664	FALSE	TRUE	a	g	1.436e-08	-0.0577	0.943933	autoGCC_q2	58935814	59617355	681.541	0.0577	0.180369	OPPOSITE	ENSG00000126790	L3HYPDH
EUR	0.0424449	0.0255393	chr14:59270382:G:A	eQTL	chr14:59270382:G:A	Retina	ENSG00000126790	autoGCC_q2	281	281	ENSG00000126790	14:59422005:C:G	chr14	59422005	G	C	6.4589e-25	0.178596	0.0161882	ENSG00000126790	chr14:59422005:C:G	0.0184	0.0075	0.01365	FALSE	TRUE	a	g	1.436e-08	-0.0577	0.943933	autoGCC_q2	58935814	59617355	681.541	0.0577	0.178596	SAME	ENSG00000126790	L3HYPDH
EUR	0.0419269	0.0252276	chr14:59270382:G:A	eQTL	chr14:59270382:G:A	Retina	ENSG00000126790	autoGCC_q2	281	281	ENSG00000126790	14:59422528:A:T	chr14	59422528	T	A	6.4589e-25	0.178596	0.0161882	ENSG00000126790	chr14:59422528:A:T	0.0184	0.0075	0.01369	FALSE	TRUE	a	g	1.436e-08	-0.0577	0.943933	autoGCC_q2	58935814	59617355	681.541	0.0577	0.178596	SAME	ENSG00000126790	L3HYPDH
EUR	0.0317672	0.0191145	chr14:59270382:G:A	eQTL	chr14:59270382:G:A	Retina	ENSG00000126790	autoGCC_q2	281	281	ENSG00000126790	14:59420444:A:T	chr14	59420444	T	A	6.45693e-25	0.178596	0.0161882	ENSG00000126790	chr14:59420444:A:T	0.018	0.0075	0.01622	FALSE	TRUE	a	g	1.436e-08	-0.0577	0.943933	autoGCC_q2	58935814	59617355	681.541	0.0577	0.178596	SAME	ENSG00000126790	L3HYPDH
EUR	0.0283242	0.0170429	chr14:59270382:G:A	eQTL	chr14:59270382:G:A	Retina	ENSG00000126790	autoGCC_q2	281	281	ENSG00000126790	14:59423166:C:G	chr14	59423166	G	C	6.4589e-25	0.178596	0.0161882	ENSG00000126790	chr14:59423166:C:G	0.0181	0.0075	0.01544	FALSE	TRUE	a	g	1.436e-08	-0.0577	0.943933	autoGCC_q2	58935814	59617355	681.541	0.0577	0.178596	SAME	ENSG00000126790	L3HYPDH
EUR	0.0251645	0.0151416	chr14:59270382:G:A	eQTL	chr14:59270382:G:A	Retina	ENSG00000126790	autoGCC_q2	281	281	ENSG00000126790	14:59426546:A:G	chr14	59426546	A	G	1.19398e-24	-0.17815	0.0162539	ENSG00000126790	chr14:59426546:A:G	0.0183	0.0075	0.01459	FALSE	TRUE	a	g	1.436e-08	-0.0577	0.943933	autoGCC_q2	58935814	59617355	681.541	0.0577	0.17815	OPPOSITE	ENSG00000126790	L3HYPDH
EUR	0.608356	0.299246	chr14:59270382:G:A	eQTL	chr14:59270382:G:A	Retina	ENSG00000151838	autoGCC_q2	281	281	ENSG00000151838	14:59439312:C:T	chr14	59439312	C	T	0.00842573	-0.0583971	0.0220573	ENSG00000151838	chr14:59439312:C:T	-0.0183	0.0075	0.01436	FALSE	FALSE	a	g	1.436e-08	-0.0577	0.943933	autoGCC_q2	58935814	59617355	681.541	0.0577	0.0583971	SAME	ENSG00000151838	CCDC175
EUR	0.391565	0.192608	chr14:59270382:G:A	eQTL	chr14:59270382:G:A	Retina	ENSG00000151838	autoGCC_q2	281	281	ENSG00000151838	14:59436386:A:C	chr14	59436386	A	C	0.00842437	-0.0583966	0.0220566	ENSG00000151838	chr14:59436386:A:C	0.0179	0.0075	0.01664	FALSE	FALSE	a	g	1.436e-08	-0.0577	0.943933	autoGCC_q2	58935814	59617355	681.541	0.0577	0.0583966	OPPOSITE	ENSG00000151838	CCDC175
EUR	0.626868	0.312647	chr14:59270382:G:A	eQTL	chr14:59270382:G:A	Retina	ENSG00000181619	autoGCC_q2	281	281	ENSG00000181619	14:59439312:C:T	chr14	59439312	C	T	1.21754e-08	-0.0801926	0.0137851	ENSG00000181619	chr14:59439312:C:T	-0.0183	0.0075	0.01436	FALSE	TRUE	a	g	1.436e-08	-0.0577	0.943933	autoGCC_q2	58935814	59617355	681.541	0.0577	0.0801926	SAME	ENSG00000181619	GPR135
EUR	0.36879	0.183932	chr14:59270382:G:A	eQTL	chr14:59270382:G:A	Retina	ENSG00000181619	autoGCC_q2	281	281	ENSG00000181619	14:59436386:A:C	chr14	59436386	A	C	1.22004e-08	-0.0801856	0.0137848	ENSG00000181619	chr14:59436386:A:C	0.0179	0.0075	0.01664	FALSE	TRUE	a	g	1.436e-08	-0.0577	0.943933	autoGCC_q2	58935814	59617355	681.541	0.0577	0.0801856	OPPOSITE	ENSG00000181619	GPR135
EUR	0.992804	0.0758934	chr10:68263296:A:G	eQTL	chr10:68263296:A:G	Retina	ENSG00000122912	mocoRNFL_q9	421	421	ENSG00000122912	10:68437482:A:T	chr10	68437482	T	A	1.10477e-06	-0.0647485	0.0130869	ENSG00000122912	chr10:68437482:A:T	0.0159	0.0077	0.03895	FALSE	TRUE	a	g	3.084e-13	-0.0618	0.940071	mocoRNFL_q9	68098183	68868604	770.421	0.0618	0.0647485	OPPOSITE	ENSG00000122912	SLC25A16
EUR	0.988812	0.0612228	chr10:68263296:A:G	eQTL	chr10:68263296:A:G	Retina	ENSG00000138346	mocoRNFL_q9	421	421	ENSG00000138346	10:68437482:A:T	chr10	68437482	T	A	0.00034728	0.0707999	0.0196231	ENSG00000138346	chr10:68437482:A:T	0.0159	0.0077	0.03895	FALSE	FALSE	a	g	3.084e-13	-0.0618	0.940071	mocoRNFL_q9	68098183	68868604	770.421	0.0618	0.0707999	SAME	ENSG00000138346	DNA2
EUR	0.911045	0.0269521	chr10:68263296:A:G	eQTL	chr10:68263296:A:G	Retina	ENSG00000138347	mocoRNFL_q9	421	421	ENSG00000138347	10:68437482:A:T	chr10	68437482	T	A	0.00434825	-0.0796429	0.0277702	ENSG00000138347	chr10:68437482:A:T	0.0159	0.0077	0.03895	FALSE	FALSE	a	g	3.084e-13	-0.0618	0.940071	mocoRNFL_q9	68098183	68868604	770.421	0.0618	0.0796429	OPPOSITE	ENSG00000138347	MYPN
EUR	0.288015	0.0277339	chr17:81562261:G:A	eQTL	chr17:81562261:G:A	Retina	ENSG00000182612	autoGCC_q0	558	558	ENSG00000182612	17:81634830:A:G	chr17	81634830	G	A	0.00225978	-0.0503792	0.016392	ENSG00000182612	chr17:81634830:A:G	-0.055	0.0074	8.848e-14	FALSE	FALSE	a	g	5.681e-09	-0.0669	0.935289	autoGCC_q0	81413132	81772846	359.714	0.0669	0.0503792	SAME	ENSG00000182612	TSPAN10
EUR	0.231235	0.0222664	chr17:81562261:G:A	eQTL	chr17:81562261:G:A	Retina	ENSG00000182612	autoGCC_q0	558	558	ENSG00000182612	17:81640574:A:G	chr17	81640574	G	A	0.00224602	-0.0504132	0.0163931	ENSG00000182612	chr17:81640574:A:G	-0.0547	0.0074	1.201e-13	FALSE	FALSE	a	g	5.681e-09	-0.0669	0.935289	autoGCC_q0	81413132	81772846	359.714	0.0669	0.0504132	SAME	ENSG00000182612	TSPAN10
EUR	0.137173	0.0132088	chr17:81562261:G:A	eQTL	chr17:81562261:G:A	Retina	ENSG00000182612	autoGCC_q0	558	558	ENSG00000182612	17:81630557:A:C	chr17	81630557	C	A	0.00226988	-0.0503538	0.016391	ENSG00000182612	chr17:81630557:A:C	-0.0548	0.0074	9.865e-14	FALSE	FALSE	a	g	5.681e-09	-0.0669	0.935289	autoGCC_q0	81413132	81772846	359.714	0.0669	0.0503538	SAME	ENSG00000182612	TSPAN10
EUR	0.108914	0.0104877	chr17:81562261:G:A	eQTL	chr17:81562261:G:A	Retina	ENSG00000182612	autoGCC_q0	558	558	ENSG00000182612	17:81625626:A:G	chr17	81625626	G	A	0.00227233	-0.0503482	0.0163909	ENSG00000182612	chr17:81625626:A:G	-0.0547	0.0074	1.154e-13	FALSE	FALSE	a	g	5.681e-09	-0.0669	0.935289	autoGCC_q0	81413132	81772846	359.714	0.0669	0.0503482	SAME	ENSG00000182612	TSPAN10
EUR	0.285394	0.0150144	chr17:81562261:G:A	eQTL	chr17:81562261:G:A	Retina	ENSG00000182446	autoGCC_q0	558	558	ENSG00000182446	17:81634830:A:G	chr17	81634830	G	A	0.349325	-0.00694257	0.00740946	ENSG00000182446	chr17:81634830:A:G	-0.055	0.0074	8.848e-14	FALSE	FALSE	a	g	5.681e-09	-0.0669	0.935289	autoGCC_q0	81413132	81772846	359.714	0.0669	0.00694257	SAME	ENSG00000182446	NPLOC4
EUR	0.220414	0.0115959	chr17:81562261:G:A	eQTL	chr17:81562261:G:A	Retina	ENSG00000182446	autoGCC_q0	558	558	ENSG00000182446	17:81640574:A:G	chr17	81640574	G	A	0.348123	-0.00696047	0.00741004	ENSG00000182446	chr17:81640574:A:G	-0.0547	0.0074	1.201e-13	FALSE	FALSE	a	g	5.681e-09	-0.0669	0.935289	autoGCC_q0	81413132	81772846	359.714	0.0669	0.00696047	SAME	ENSG00000182446	NPLOC4
EUR	0.286136	0.0296308	chr17:81562261:G:A	eQTL	chr17:81562261:G:A	Retina	ENSG00000275902	autoGCC_q0	558	558	ENSG00000275902	17:81634830:A:G	chr17	81634830	G	A	9.78492e-06	-0.0660822	0.0147546	ENSG00000275902	chr17:81634830:A:G	-0.055	0.0074	8.848e-14	FALSE	TRUE	a	g	5.681e-09	-0.0669	0.935289	autoGCC_q0	81413132	81772846	359.714	0.0669	0.0660822	SAME	ENSG00000275902	RP13-1032I1.11
EUR	0.228299	0.0236415	chr17:81562261:G:A	eQTL	chr17:81562261:G:A	Retina	ENSG00000275902	autoGCC_q0	558	558	ENSG00000275902	17:81640574:A:G	chr17	81640574	G	A	9.84335e-06	-0.0660689	0.014756	ENSG00000275902	chr17:81640574:A:G	-0.0547	0.0074	1.201e-13	FALSE	TRUE	a	g	5.681e-09	-0.0669	0.935289	autoGCC_q0	81413132	81772846	359.714	0.0669	0.0660689	SAME	ENSG00000275902	RP13-1032I1.11
EUR	0.138146	0.0143057	chr17:81562261:G:A	eQTL	chr17:81562261:G:A	Retina	ENSG00000275902	autoGCC_q0	558	558	ENSG00000275902	17:81630557:A:C	chr17	81630557	C	A	9.73869e-06	-0.0660924	0.0147534	ENSG00000275902	chr17:81630557:A:C	-0.0548	0.0074	9.865e-14	FALSE	TRUE	a	g	5.681e-09	-0.0669	0.935289	autoGCC_q0	81413132	81772846	359.714	0.0669	0.0660924	SAME	ENSG00000275902	RP13-1032I1.11
EUR	0.110148	0.0114064	chr17:81562261:G:A	eQTL	chr17:81562261:G:A	Retina	ENSG00000275902	autoGCC_q0	558	558	ENSG00000275902	17:81625626:A:G	chr17	81625626	G	A	9.73091e-06	-0.0660944	0.0147533	ENSG00000275902	chr17:81625626:A:G	-0.0547	0.0074	1.154e-13	FALSE	TRUE	a	g	5.681e-09	-0.0669	0.935289	autoGCC_q0	81413132	81772846	359.714	0.0669	0.0660944	SAME	ENSG00000275902	RP13-1032I1.11
EUR	0.0968252	0.0100267	chr17:81562261:G:A	eQTL	chr17:81562261:G:A	Retina	ENSG00000275902	autoGCC_q0	558	558	ENSG00000275902	17:81617163:C:T	chr17	81617163	T	C	9.73091e-06	-0.0660944	0.0147533	ENSG00000275902	chr17:81617163:C:T	0.0547	0.0074	1.174e-13	FALSE	TRUE	a	g	5.681e-09	-0.0669	0.935289	autoGCC_q0	81413132	81772846	359.714	0.0669	0.0660944	OPPOSITE	ENSG00000275902	RP13-1032I1.11
EUR	0.288015	0.0277339	chr17:81647906:TTAAC:T	eQTL	chr17:81647906:T:TTAAC	Retina	ENSG00000182612	autoGCC_q0	552	552	ENSG00000182612	17:81634830:A:G	chr17	81634830	G	A	0.00225978	-0.0503792	0.016392	ENSG00000182612	chr17:81634830:A:G	-0.055	0.0074	8.848e-14	FALSE	FALSE	t	ttaac	1.414e-21	0.0737	1.07648	autoGCC_q0	81418853	81779444	360.591	0.0737	0.0503792	SAME	ENSG00000182612	TSPAN10
EUR	0.231235	0.0222664	chr17:81647906:TTAAC:T	eQTL	chr17:81647906:T:TTAAC	Retina	ENSG00000182612	autoGCC_q0	552	552	ENSG00000182612	17:81640574:A:G	chr17	81640574	G	A	0.00224602	-0.0504132	0.0163931	ENSG00000182612	chr17:81640574:A:G	-0.0547	0.0074	1.201e-13	FALSE	FALSE	t	ttaac	1.414e-21	0.0737	1.07648	autoGCC_q0	81418853	81779444	360.591	0.0737	0.0504132	SAME	ENSG00000182612	TSPAN10
EUR	0.137173	0.0132088	chr17:81647906:TTAAC:T	eQTL	chr17:81647906:T:TTAAC	Retina	ENSG00000182612	autoGCC_q0	552	552	ENSG00000182612	17:81630557:A:C	chr17	81630557	C	A	0.00226988	-0.0503538	0.016391	ENSG00000182612	chr17:81630557:A:C	-0.0548	0.0074	9.865e-14	FALSE	FALSE	t	ttaac	1.414e-21	0.0737	1.07648	autoGCC_q0	81418853	81779444	360.591	0.0737	0.0503538	SAME	ENSG00000182612	TSPAN10
EUR	0.108914	0.0104877	chr17:81647906:TTAAC:T	eQTL	chr17:81647906:T:TTAAC	Retina	ENSG00000182612	autoGCC_q0	552	552	ENSG00000182612	17:81625626:A:G	chr17	81625626	G	A	0.00227233	-0.0503482	0.0163909	ENSG00000182612	chr17:81625626:A:G	-0.0547	0.0074	1.154e-13	FALSE	FALSE	t	ttaac	1.414e-21	0.0737	1.07648	autoGCC_q0	81418853	81779444	360.591	0.0737	0.0503482	SAME	ENSG00000182612	TSPAN10
EUR	0.285394	0.015015	chr17:81647906:TTAAC:T	eQTL	chr17:81647906:T:TTAAC	Retina	ENSG00000182446	autoGCC_q0	552	552	ENSG00000182446	17:81634830:A:G	chr17	81634830	G	A	0.349325	-0.00694257	0.00740946	ENSG00000182446	chr17:81634830:A:G	-0.055	0.0074	8.848e-14	FALSE	FALSE	t	ttaac	1.414e-21	0.0737	1.07648	autoGCC_q0	81418853	81779444	360.591	0.0737	0.00694257	SAME	ENSG00000182446	NPLOC4
EUR	0.220414	0.0115963	chr17:81647906:TTAAC:T	eQTL	chr17:81647906:T:TTAAC	Retina	ENSG00000182446	autoGCC_q0	552	552	ENSG00000182446	17:81640574:A:G	chr17	81640574	G	A	0.348123	-0.00696047	0.00741004	ENSG00000182446	chr17:81640574:A:G	-0.0547	0.0074	1.201e-13	FALSE	FALSE	t	ttaac	1.414e-21	0.0737	1.07648	autoGCC_q0	81418853	81779444	360.591	0.0737	0.00696047	SAME	ENSG00000182446	NPLOC4
EUR	0.286136	0.0296308	chr17:81647906:TTAAC:T	eQTL	chr17:81647906:T:TTAAC	Retina	ENSG00000275902	autoGCC_q0	552	552	ENSG00000275902	17:81634830:A:G	chr17	81634830	G	A	9.78492e-06	-0.0660822	0.0147546	ENSG00000275902	chr17:81634830:A:G	-0.055	0.0074	8.848e-14	FALSE	TRUE	t	ttaac	1.414e-21	0.0737	1.07648	autoGCC_q0	81418853	81779444	360.591	0.0737	0.0660822	SAME	ENSG00000275902	RP13-1032I1.11
EUR	0.228299	0.0236415	chr17:81647906:TTAAC:T	eQTL	chr17:81647906:T:TTAAC	Retina	ENSG00000275902	autoGCC_q0	552	552	ENSG00000275902	17:81640574:A:G	chr17	81640574	G	A	9.84335e-06	-0.0660689	0.014756	ENSG00000275902	chr17:81640574:A:G	-0.0547	0.0074	1.201e-13	FALSE	TRUE	t	ttaac	1.414e-21	0.0737	1.07648	autoGCC_q0	81418853	81779444	360.591	0.0737	0.0660689	SAME	ENSG00000275902	RP13-1032I1.11
EUR	0.138146	0.0143057	chr17:81647906:TTAAC:T	eQTL	chr17:81647906:T:TTAAC	Retina	ENSG00000275902	autoGCC_q0	552	552	ENSG00000275902	17:81630557:A:C	chr17	81630557	C	A	9.73869e-06	-0.0660924	0.0147534	ENSG00000275902	chr17:81630557:A:C	-0.0548	0.0074	9.865e-14	FALSE	TRUE	t	ttaac	1.414e-21	0.0737	1.07648	autoGCC_q0	81418853	81779444	360.591	0.0737	0.0660924	SAME	ENSG00000275902	RP13-1032I1.11
EUR	0.110148	0.0114064	chr17:81647906:TTAAC:T	eQTL	chr17:81647906:T:TTAAC	Retina	ENSG00000275902	autoGCC_q0	552	552	ENSG00000275902	17:81625626:A:G	chr17	81625626	G	A	9.73091e-06	-0.0660944	0.0147533	ENSG00000275902	chr17:81625626:A:G	-0.0547	0.0074	1.154e-13	FALSE	TRUE	t	ttaac	1.414e-21	0.0737	1.07648	autoGCC_q0	81418853	81779444	360.591	0.0737	0.0660944	SAME	ENSG00000275902	RP13-1032I1.11
EUR	0.0968252	0.0100267	chr17:81647906:TTAAC:T	eQTL	chr17:81647906:T:TTAAC	Retina	ENSG00000275902	autoGCC_q0	552	552	ENSG00000275902	17:81617163:C:T	chr17	81617163	T	C	9.73091e-06	-0.0660944	0.0147533	ENSG00000275902	chr17:81617163:C:T	0.0547	0.0074	1.174e-13	FALSE	TRUE	t	ttaac	1.414e-21	0.0737	1.07648	autoGCC_q0	81418853	81779444	360.591	0.0737	0.0660944	OPPOSITE	ENSG00000275902	RP13-1032I1.11
EUR	0.905889	0.0127012	chr15:27985172:C:T	eQTL	chr15:27985172:C:T	Retina	ENSG00000206149	autoGCC_q4	582	582	ENSG00000206149	15:28713579:A:G	chr15	28713579	G	A	4.32019e-20	-0.318275	0.0328578	ENSG00000206149	chr15:28713579:A:G	0.0668	0.026	0.01013	FALSE	TRUE	t	c	2.52e-08	-0.0745	0.928207	autoGCC_q4	27684286	28789849	1105.56	0.0745	0.318275	OPPOSITE	ENSG00000206149	HERC2P9
EUR	0.202978	0.0193996	chr17:81644245:A:G	eQTL	chr17:81644245:A:G	Retina	ENSG00000182612	autoGCC_q4	552	552	ENSG00000182612	17:81640574:A:G	chr17	81640574	G	A	0.00224602	-0.0504132	0.0163931	ENSG00000182612	chr17:81640574:A:G	0.0344	0.0074	3.196e-06	FALSE	FALSE	a	g	4.123e-11	0.051	1.05232	autoGCC_q4	81418853	81779444	360.591	0.051	0.0504132	OPPOSITE	ENSG00000182612	TSPAN10
EUR	0.132543	0.0126678	chr17:81644245:A:G	eQTL	chr17:81644245:A:G	Retina	ENSG00000182612	autoGCC_q4	552	552	ENSG00000182612	17:81624787:C:T	chr17	81624787	T	C	0.00229097	-0.0503183	0.0163945	ENSG00000182612	chr17:81624787:C:T	-0.0344	0.0074	3.161e-06	FALSE	FALSE	a	g	4.123e-11	0.051	1.05232	autoGCC_q4	81418853	81779444	360.591	0.051	0.0503183	SAME	ENSG00000182612	TSPAN10
EUR	0.11725	0.0112061	chr17:81644245:A:G	eQTL	chr17:81644245:A:G	Retina	ENSG00000182612	autoGCC_q4	552	552	ENSG00000182612	17:81625626:A:G	chr17	81625626	G	A	0.00227233	-0.0503482	0.0163909	ENSG00000182612	chr17:81625626:A:G	0.0343	0.0074	3.372e-06	FALSE	FALSE	a	g	4.123e-11	0.051	1.05232	autoGCC_q4	81418853	81779444	360.591	0.051	0.0503482	OPPOSITE	ENSG00000182612	TSPAN10
EUR	0.110428	0.0105541	chr17:81644245:A:G	eQTL	chr17:81644245:A:G	Retina	ENSG00000182612	autoGCC_q4	552	552	ENSG00000182612	17:81617163:C:T	chr17	81617163	T	C	0.00227233	-0.0503482	0.0163909	ENSG00000182612	chr17:81617163:C:T	-0.0343	0.0074	3.363e-06	FALSE	FALSE	a	g	4.123e-11	0.051	1.05232	autoGCC_q4	81418853	81779444	360.591	0.051	0.0503482	SAME	ENSG00000182612	TSPAN10
EUR	0.192071	0.0101033	chr17:81644245:A:G	eQTL	chr17:81644245:A:G	Retina	ENSG00000182446	autoGCC_q4	552	552	ENSG00000182446	17:81640574:A:G	chr17	81640574	G	A	0.348123	-0.00696047	0.00741004	ENSG00000182446	chr17:81640574:A:G	0.0344	0.0074	3.196e-06	FALSE	FALSE	a	g	4.123e-11	0.051	1.05232	autoGCC_q4	81418853	81779444	360.591	0.051	0.00696047	OPPOSITE	ENSG00000182446	NPLOC4
EUR	0.199582	0.0205976	chr17:81644245:A:G	eQTL	chr17:81644245:A:G	Retina	ENSG00000275902	autoGCC_q4	552	552	ENSG00000275902	17:81640574:A:G	chr17	81640574	G	A	9.84335e-06	-0.0660689	0.014756	ENSG00000275902	chr17:81640574:A:G	0.0344	0.0074	3.196e-06	FALSE	TRUE	a	g	4.123e-11	0.051	1.05232	autoGCC_q4	81418853	81779444	360.591	0.051	0.0660689	OPPOSITE	ENSG00000275902	RP13-1032I1.11
EUR	0.137455	0.0141859	chr17:81644245:A:G	eQTL	chr17:81644245:A:G	Retina	ENSG00000275902	autoGCC_q4	552	552	ENSG00000275902	17:81624787:C:T	chr17	81624787	T	C	9.67084e-06	-0.0661273	0.014756	ENSG00000275902	chr17:81624787:C:T	-0.0344	0.0074	3.161e-06	FALSE	TRUE	a	g	4.123e-11	0.051	1.05232	autoGCC_q4	81418853	81779444	360.591	0.051	0.0661273	SAME	ENSG00000275902	RP13-1032I1.11
EUR	0.118094	0.0121878	chr17:81644245:A:G	eQTL	chr17:81644245:A:G	Retina	ENSG00000275902	autoGCC_q4	552	552	ENSG00000275902	17:81625626:A:G	chr17	81625626	G	A	9.73091e-06	-0.0660944	0.0147533	ENSG00000275902	chr17:81625626:A:G	0.0343	0.0074	3.372e-06	FALSE	TRUE	a	g	4.123e-11	0.051	1.05232	autoGCC_q4	81418853	81779444	360.591	0.051	0.0660944	OPPOSITE	ENSG00000275902	RP13-1032I1.11
EUR	0.110956	0.011451	chr17:81644245:A:G	eQTL	chr17:81644245:A:G	Retina	ENSG00000275902	autoGCC_q4	552	552	ENSG00000275902	17:81617163:C:T	chr17	81617163	T	C	9.73091e-06	-0.0660944	0.0147533	ENSG00000275902	chr17:81617163:C:T	-0.0343	0.0074	3.363e-06	FALSE	TRUE	a	g	4.123e-11	0.051	1.05232	autoGCC_q4	81418853	81779444	360.591	0.051	0.0660944	SAME	ENSG00000275902	RP13-1032I1.11
Cross-ancestry	0.296745	0.0210013	chr10:68261045:G:A	eQTL	chr10:68261100:C:G	Retina	ENSG00000138347	autoRNFL_q4	554	554	ENSG00000138347	10:68238298:A:C	chr10	68238298	A	C	0.000733817	-0.105297	0.0309451	ENSG00000138347	chr10:68238298:A:C	-0.0435	0.0082	1.333e-07	FALSE	FALSE	a	g	1.894e-09	0.0478	1.04896	autoRNFL_q4	67736409	68416974	680.565	0.0478	0.105297	SAME	ENSG00000138347	MYPN
Cross-ancestry	0.286981	0.0203102	chr10:68261045:G:A	eQTL	chr10:68261100:C:G	Retina	ENSG00000138347	autoRNFL_q4	554	554	ENSG00000138347	10:68240536:A:G	chr10	68240536	G	A	0.000722337	-0.105382	0.0309296	ENSG00000138347	chr10:68240536:A:G	-0.0438	0.0082	8.166e-08	FALSE	FALSE	a	g	1.894e-09	0.0478	1.04896	autoRNFL_q4	67736409	68416974	680.565	0.0478	0.105382	SAME	ENSG00000138347	MYPN
Cross-ancestry	0.2307	0.0163272	chr10:68261045:G:A	eQTL	chr10:68261100:C:G	Retina	ENSG00000138347	autoRNFL_q4	554	554	ENSG00000138347	10:68242636:A:T	chr10	68242636	T	A	0.000741928	-0.105295	0.0309724	ENSG00000138347	chr10:68242636:A:T	-0.0435	0.0082	9.968e-08	FALSE	FALSE	a	g	1.894e-09	0.0478	1.04896	autoRNFL_q4	67736409	68416974	680.565	0.0478	0.105295	SAME	ENSG00000138347	MYPN
Cross-ancestry	0.996007	0.0437187	chr14:74070028:C:T	eQTL	chr14:74126422:A:G	Retina	ENSG00000140043	autoRNFL_q4	633	633	ENSG00000140043	14:74008147:A:T	chr14	74008147	T	A	1.00065e-36	-0.221929	0.0158133	ENSG00000140043	chr14:74008147:A:T	-0.0247	0.0074	0.0008305	FALSE	TRUE	t	c	2.105e-09	-0.065	0.937067	autoRNFL_q4	73700162	74706180	1006.02	0.065	0.221929	SAME	ENSG00000140043	PTGR2
Cross-ancestry	0.756704	0.0126574	chr14:74070028:C:T	eQTL	chr14:74126422:A:G	Retina	ENSG00000258653	autoRNFL_q4	634	634	ENSG00000258653	14:74008147:A:T	chr14	74008147	T	A	8.81857e-11	-0.207848	0.0311953	ENSG00000258653	chr14:74008147:A:T	-0.0247	0.0074	0.0008305	FALSE	TRUE	t	c	2.105e-09	-0.065	0.937067	autoRNFL_q4	73700162	74706180	1006.02	0.065	0.207848	SAME	ENSG00000258653	RP5-1021I20.4
Cross-ancestry	0.494375	0.057681	chr14:59270382:G:A	eQTL	chr14:59336116:C:T	Retina	ENSG00000126790	autoGCC_q10	982	982	ENSG00000126790	14:59478818:A:G	chr14	59478818	G	A	1.08176e-32	-0.205312	0.0157422	ENSG00000126790	chr14:59478818:A:G	-0.0229	0.0071	0.001195	FALSE	TRUE	a	g	2.91e-08	-0.0518	0.949519	autoGCC_q10	59164061	59497831	333.77	0.0518	0.205312	SAME	ENSG00000126790	L3HYPDH
Cross-ancestry	0.196562	0.0229338	chr14:59270382:G:A	eQTL	chr14:59336116:C:T	Retina	ENSG00000126790	autoGCC_q10	982	982	ENSG00000126790	14:59482730:G:C	chr14	59482730	C	G	6.10646e-36	-0.218329	0.0157716	ENSG00000126790	chr14:59482730:G:C	0.0219	0.0071	0.002177	FALSE	TRUE	a	g	2.91e-08	-0.0518	0.949519	autoGCC_q10	59164061	59497831	333.77	0.0518	0.218329	OPPOSITE	ENSG00000126790	L3HYPDH
Cross-ancestry	0.166852	0.0194674	chr14:59270382:G:A	eQTL	chr14:59336116:C:T	Retina	ENSG00000126790	autoGCC_q10	982	982	ENSG00000126790	14:59476750:G:T	chr14	59476750	T	G	5.73422e-36	-0.218407	0.0157697	ENSG00000126790	chr14:59476750:G:T	0.0216	0.0071	0.002516	FALSE	TRUE	a	g	2.91e-08	-0.0518	0.949519	autoGCC_q10	59164061	59497831	333.77	0.0518	0.218407	OPPOSITE	ENSG00000126790	L3HYPDH
Cross-ancestry	0.0867971	0.010127	chr14:59270382:G:A	eQTL	chr14:59336116:C:T	Retina	ENSG00000126790	autoGCC_q10	982	982	ENSG00000126790	14:59483699:T:G	chr14	59483699	G	T	6.16813e-36	-0.218311	0.0157715	ENSG00000126790	chr14:59483699:T:G	-0.022	0.0071	0.002097	FALSE	TRUE	a	g	2.91e-08	-0.0518	0.949519	autoGCC_q10	59164061	59497831	333.77	0.0518	0.218311	SAME	ENSG00000126790	L3HYPDH
Cross-ancestry	0.407083	0.0273314	chr10:68212053:TAG:T	eQTL	chr10:68212011:A:G	Retina	ENSG00000138347	mocoRNFL_q5	408	408	ENSG00000138347	10:68238298:A:C	chr10	68238298	A	C	0.000733817	-0.105297	0.0309451	ENSG00000138347	chr10:68238298:A:C	0.0462	0.0083	3.143e-08	FALSE	FALSE	t	tag	2.061e-09	-0.0566	0.944972	mocoRNFL_q5	67947672	68343078	395.406	0.0566	0.105297	OPPOSITE	ENSG00000138347	MYPN
Cross-ancestry	0.213877	0.0143596	chr10:68212053:TAG:T	eQTL	chr10:68212011:A:G	Retina	ENSG00000138347	mocoRNFL_q5	408	408	ENSG00000138347	10:68240536:A:G	chr10	68240536	G	A	0.000722337	-0.105382	0.0309296	ENSG00000138347	chr10:68240536:A:G	0.0455	0.0083	3.771e-08	FALSE	FALSE	t	tag	2.061e-09	-0.0566	0.944972	mocoRNFL_q5	67947672	68343078	395.406	0.0566	0.105382	OPPOSITE	ENSG00000138347	MYPN
Cross-ancestry	0.160727	0.0107912	chr10:68212053:TAG:T	eQTL	chr10:68212011:A:G	Retina	ENSG00000138347	mocoRNFL_q5	408	408	ENSG00000138347	10:68236698:A:G	chr10	68236698	A	G	0.0007433	-0.105203	0.0309502	ENSG00000138347	chr10:68236698:A:G	0.0464	0.0083	2.682e-08	FALSE	FALSE	t	tag	2.061e-09	-0.0566	0.944972	mocoRNFL_q5	67947672	68343078	395.406	0.0566	0.105203	OPPOSITE	ENSG00000138347	MYPN
Cross-ancestry	0.799523	0.598753	chr14:74199522:T:C	eQTL	chr14:74126422:A:G	Retina	ENSG00000140043	mocoRNFL_q5	497	497	ENSG00000140043	14:74008147:A:T	chr14	74008147	T	A	1.00065e-36	-0.221929	0.0158133	ENSG00000140043	chr14:74008147:A:T	0.0286	0.0075	0.0001352	FALSE	TRUE	t	c	4.47e-08	-0.0613	0.940541	mocoRNFL_q5	73700162	74706180	1006.02	0.0613	0.221929	OPPOSITE	ENSG00000140043	PTGR2
Cross-ancestry	0.200185	0.149916	chr14:74199522:T:C	eQTL	chr14:74126422:A:G	Retina	ENSG00000140043	mocoRNFL_q5	497	497	ENSG00000140043	14:74034747:C:G	chr14	74034747	G	C	3.80035e-44	-0.248966	0.0157535	ENSG00000140043	chr14:74034747:C:G	0.0288	0.0079	0.0002595	FALSE	TRUE	t	c	4.47e-08	-0.0613	0.940541	mocoRNFL_q5	73700162	74706180	1006.02	0.0613	0.248966	OPPOSITE	ENSG00000140043	PTGR2
Cross-ancestry	0.221434	0.0177217	chr10:68281826:C:T	eQTL	chr10:68282506:A:G	Retina	ENSG00000138347	mocoGCC_q3	822	822	ENSG00000138347	10:68242636:A:T	chr10	68242636	T	A	0.000741928	-0.105295	0.0309724	ENSG00000138347	chr10:68242636:A:T	0.0552	0.0083	3.275e-11	FALSE	FALSE	t	c	1.691e-11	-0.0559	0.945634	mocoGCC_q3	68156426	68422247	265.821	0.0559	0.105295	OPPOSITE	ENSG00000138347	MYPN
Cross-ancestry	0.218442	0.0174823	chr10:68281826:C:T	eQTL	chr10:68282506:A:G	Retina	ENSG00000138347	mocoGCC_q3	822	822	ENSG00000138347	10:68240536:A:G	chr10	68240536	G	A	0.000722337	-0.105382	0.0309296	ENSG00000138347	chr10:68240536:A:G	0.0551	0.0083	3.649e-11	FALSE	FALSE	t	c	1.691e-11	-0.0559	0.945634	mocoGCC_q3	68156426	68422247	265.821	0.0559	0.105382	OPPOSITE	ENSG00000138347	MYPN
Cross-ancestry	0.156797	0.0125487	chr10:68281826:C:T	eQTL	chr10:68282506:A:G	Retina	ENSG00000138347	mocoGCC_q3	822	822	ENSG00000138347	10:68238298:A:C	chr10	68238298	A	C	0.000733817	-0.105297	0.0309451	ENSG00000138347	chr10:68238298:A:C	0.0549	0.0084	5.28e-11	FALSE	FALSE	t	c	1.691e-11	-0.0559	0.945634	mocoGCC_q3	68156426	68422247	265.821	0.0559	0.105297	OPPOSITE	ENSG00000138347	MYPN
Cross-ancestry	0.137759	0.011025	chr10:68281826:C:T	eQTL	chr10:68282506:A:G	Retina	ENSG00000138347	mocoGCC_q3	822	822	ENSG00000138347	10:68236698:A:G	chr10	68236698	A	G	0.0007433	-0.105203	0.0309502	ENSG00000138347	chr10:68236698:A:G	0.0551	0.0084	4.622e-11	FALSE	FALSE	t	c	1.691e-11	-0.0559	0.945634	mocoGCC_q3	68156426	68422247	265.821	0.0559	0.105203	OPPOSITE	ENSG00000138347	MYPN
Cross-ancestry	0.751391	0.0446989	chr8:108279863:C:T	eQTL	chr8:108279912:A:G	Retina	ENSG00000147655	autoRNFL_q3	898	898	ENSG00000147655	8:108201271:C:A	chr8	108201271	A	C	0.00330687	0.112755	0.0381538	ENSG00000147655	chr8:108201271:C:A	-0.0324	0.0079	3.984e-05	FALSE	FALSE	t	c	7.242e-09	-0.0476	0.953515	autoRNFL_q3	108136563	108441555	304.992	0.0476	0.112755	OPPOSITE	ENSG00000147655	RSPO2
Cross-ancestry	0.132054	0.0131532	chr8:108281809:C:T	eQTL	chr8:108282069:C:CA	Retina	ENSG00000147655	autoRNFL_q6	813	813	ENSG00000147655	8:108107899:G:A	chr8	108107899	A	G	0.00167376	0.116792	0.0369125	ENSG00000147655	chr8:108107899:G:A	0.0299	0.0071	2.74e-05	FALSE	FALSE	t	c	1.385e-08	0.046	1.04707	autoRNFL_q6	108050495	108439150	388.655	0.046	0.116792	SAME	ENSG00000147655	RSPO2
Cross-ancestry	0.481464	0.0186069	chr10:68261045:G:A	eQTL	chr10:68261100:C:G	Retina	ENSG00000138347	autoRNFL_q6	734	734	ENSG00000138347	10:68242636:A:T	chr10	68242636	T	A	0.000741928	-0.105295	0.0309724	ENSG00000138347	chr10:68242636:A:T	-0.0781	0.0082	2.861e-21	FALSE	FALSE	a	g	1.105e-24	0.0822	1.08567	autoRNFL_q6	67736409	68416974	680.565	0.0822	0.105295	SAME	ENSG00000138347	MYPN
Cross-ancestry	0.294227	0.042282	chr8:108170015:T:C	eQTL	chr8:108169744:C:T	Retina	ENSG00000147655	autoRNFL_q1	946	946	ENSG00000147655	8:108107899:G:A	chr8	108107899	A	G	0.00167376	0.116792	0.0369125	ENSG00000147655	chr8:108107899:G:A	0.0413	0.007	4.794e-09	FALSE	FALSE	t	c	1.688e-12	-0.0566	0.944972	autoRNFL_q1	107871017	108235425	364.408	0.0566	0.116792	SAME	ENSG00000147655	RSPO2
Cross-ancestry	0.0910077	0.0130783	chr8:108170015:T:C	eQTL	chr8:108169744:C:T	Retina	ENSG00000147655	autoRNFL_q1	946	946	ENSG00000147655	8:108093057:T:C	chr8	108093057	C	T	0.00174741	0.116346	0.0369216	ENSG00000147655	chr8:108093057:T:C	-0.0409	0.007	6.815e-09	FALSE	FALSE	t	c	1.688e-12	-0.0566	0.944972	autoRNFL_q1	107871017	108235425	364.408	0.0566	0.116346	OPPOSITE	ENSG00000147655	RSPO2
Cross-ancestry	0.0903218	0.0129797	chr8:108170015:T:C	eQTL	chr8:108169744:C:T	Retina	ENSG00000147655	autoRNFL_q1	946	946	ENSG00000147655	8:108102894:T:C	chr8	108102894	C	T	0.00167324	0.116795	0.0369125	ENSG00000147655	chr8:108102894:T:C	-0.0408	0.007	7.197e-09	FALSE	FALSE	t	c	1.688e-12	-0.0566	0.944972	autoRNFL_q1	107871017	108235425	364.408	0.0566	0.116795	OPPOSITE	ENSG00000147655	RSPO2
Cross-ancestry	0.45532	0.028442	chr10:68261045:G:A	eQTL	chr10:68261100:C:G	Retina	ENSG00000138347	autoRNFL_q1	536	536	ENSG00000138347	10:68238298:A:C	chr10	68238298	A	C	0.000733817	-0.105297	0.0309451	ENSG00000138347	chr10:68238298:A:C	-0.0425	0.0082	2.545e-07	FALSE	FALSE	a	g	3.04e-08	0.044	1.04498	autoRNFL_q1	67736409	68416974	680.565	0.044	0.105297	SAME	ENSG00000138347	MYPN
Cross-ancestry	0.185032	0.0115582	chr10:68261045:G:A	eQTL	chr10:68261100:C:G	Retina	ENSG00000138347	autoRNFL_q1	536	536	ENSG00000138347	10:68236698:A:G	chr10	68236698	A	G	0.0007433	-0.105203	0.0309502	ENSG00000138347	chr10:68236698:A:G	-0.0421	0.0082	3.26e-07	FALSE	FALSE	a	g	3.04e-08	0.044	1.04498	autoRNFL_q1	67736409	68416974	680.565	0.044	0.105203	SAME	ENSG00000138347	MYPN
Cross-ancestry	0.857419	0.0585847	chr14:74199522:T:C	eQTL	chr14:74126422:A:G	Retina	ENSG00000205659	autoRNFL_q1	795	795	ENSG00000205659	14:74042674:C:T	chr14	74042674	T	C	1.98436e-12	0.0627787	0.00864552	ENSG00000205659	chr14:74042674:C:T	-0.0193	0.0074	0.009646	FALSE	TRUE	t	c	1.175e-08	0.063	1.06503	autoRNFL_q1	73700162	74706180	1006.02	0.063	0.0627787	OPPOSITE	ENSG00000205659	LIN52
Cross-ancestry	0.857215	0.0585847	chr14:74199522:T:C	eQTL	chr14:74126422:A:G	Retina	ENSG00000119636	autoRNFL_q1	795	795	ENSG00000119636	14:74042674:C:T	chr14	74042674	T	C	8.32274e-20	0.0727101	0.00757107	ENSG00000119636	chr14:74042674:C:T	-0.0193	0.0074	0.009646	FALSE	TRUE	t	c	1.175e-08	0.063	1.06503	autoRNFL_q1	73700162	74706180	1006.02	0.063	0.0727101	OPPOSITE	ENSG00000119636	BBOF1
Cross-ancestry	0.731582	0.0100829	chr10:68281826:C:T	eQTL	chr10:68282506:A:G	Retina	ENSG00000138347	autoGCC_q8	822	822	ENSG00000138347	10:68192084:G:C	chr10	68192084	G	C	1.46271e-05	-0.113911	0.0259604	ENSG00000138347	chr10:68192084:G:C	-0.0291	0.0071	4.734e-05	FALSE	TRUE	t	c	5.301e-09	-0.0485	0.952657	autoGCC_q8	68156426	68422247	265.821	0.0485	0.113911	SAME	ENSG00000138347	MYPN
Cross-ancestry	0.895367	0.0157175	chr14:59268154:G:C	eQTL	chr14:59268292:A:G	Retina	ENSG00000126790	autoGCC_q2	975	975	ENSG00000126790	14:59478818:A:G	chr14	59478818	G	A	1.08176e-32	-0.205312	0.0157422	ENSG00000126790	chr14:59478818:A:G	-0.0188	0.0071	0.008559	FALSE	TRUE	c	g	1.856e-09	-0.0588	0.942895	autoGCC_q2	59169037	59497360	328.323	0.0588	0.205312	SAME	ENSG00000126790	L3HYPDH
Cross-ancestry	0.466698	0.0524357	chr14:60498124:TG:T	eQTL	chr14:60498085:C:T	Retina	ENSG00000258670	autoGCC_q2	467	467	ENSG00000258670	14:60449455:T:C	chr14	60449455	C	T	2.03843e-11	0.151851	0.0220122	ENSG00000258670	chr14:60449455:T:C	0.0428	0.0076	2.118e-08	FALSE	TRUE	t	tg	1.396e-08	-0.0434	0.957528	autoGCC_q2	59846141	60865307	1019.17	0.0434	0.151851	SAME	ENSG00000258670	RP11-1042B17.3
Cross-ancestry	0.40412	0.0454047	chr14:60498124:TG:T	eQTL	chr14:60498085:C:T	Retina	ENSG00000258670	autoGCC_q2	467	467	ENSG00000258670	14:60450295:A:G	chr14	60450295	G	A	2.01656e-11	0.151887	0.022012	ENSG00000258670	chr14:60450295:A:G	0.0428	0.0076	2.174e-08	FALSE	TRUE	t	tg	1.396e-08	-0.0434	0.957528	autoGCC_q2	59846141	60865307	1019.17	0.0434	0.151887	SAME	ENSG00000258670	RP11-1042B17.3
Cross-ancestry	0.715993	0.0100105	chr10:68281826:C:T	eQTL	chr10:68282506:A:G	Retina	ENSG00000138347	autoGCC_q4	822	822	ENSG00000138347	10:68192084:G:C	chr10	68192084	G	C	1.46271e-05	-0.113911	0.0259604	ENSG00000138347	chr10:68192084:G:C	-0.0275	0.0071	0.0001054	FALSE	TRUE	t	c	6.2e-10	-0.051	0.950279	autoGCC_q4	68156426	68422247	265.821	0.051	0.113911	SAME	ENSG00000138347	MYPN

## Sheet: ECLIPSER_retina_Table2
ECLIPSER output Table 2 of EUR and cross-ancestry meta-analyses loci with retina eQTLs
population	GWAS_Loci	Effect allele	Other Allele	P-VALUE	GWAS_effect	CHR_x	BP_Build38_x	GWAS_OR	GWAS_Trait	GWAS_variant(aligned to GTEx)	LD_interval_start(b38)	LD_interval_end(b38)	LD_interval_size(kb)	CHR_y	BP_Build38_y	# eQTL-tissue pairs (eCAVIAR)	CHR	BP_Build38	# eGenes tested (eCAVIAR)	# significant eQTL-tissue pairs (eCAVIAR)	# significant eGenes (eCAVIAR)	List_of_colocalizing_eGenes(eCAVIAR)	# sQTL-tissue pairs (eCAVIAR)	# sGenes tested (eCAVIAR)	# significant sQTL-tissue pairs (eCAVIAR)	# significant sGenes (eCAVIAR)	List_of_colocalizing_sGenes(eCAVIAR)	# significant sGenes by intron cluster (eCAVIAR)	List_of_colocalizing_sGenes_by_intron_cluster(eCAVIAR)	# e/sGenes tested (eCAVIAR)	# significantly colocalizing e/sGenes (eCAVIAR)	List_of_significantly_colocalizing_e/sGenes(eCAVIAR)	List_of_significantly_colocalizing_e/sGenes_by_CLPP(eCAVIAR)	List_of_significantly_colocalizing_e/sGenes_by_direction_of_effect(eCAVIAR)	List_of_significantly_colocalizing_e/sGenes_by_CLPP_and_direction_of_effect(eCAVIAR)	Gene_symbol	Tissues
EUR	chr10:68263296:A:G	a	g	5.984e-10	-0.0526	chr10	68263296	0.948759	autoRNFL_q4	chr10:68263296:A:G	68098183	68868604	770.421	10	68263296	2	10	68263296	2	1	1	SLC25A16	0	0	0	0		0		2	1	SLC25A16 (e)	SLC25A16 (e,max_CLPP=0.04)	SLC25A16 (e[1-])	SLC25A16 (e[1-],max_CLPP=0.04)	SLC25A16	Retina
EUR	chr17:81611261:G:A	a	g	7.202e-09	-0.0449	chr17	81611261	0.956093	mocoGCC_q3	chr17:81611261:G:A	81418853	81779444	360.591	17	81611261	3	17	81611261	3	1	1	RP13-1032I1.11	0	0	0	0		0		3	1	RP13-1032I1.11 (e)	RP13-1032I1.11 (e,max_CLPP=0.01)	RP13-1032I1.11 (e[1-])	RP13-1032I1.11 (e[1-],max_CLPP=0.01)	RP13-1032I1.11	Retina
EUR	chr10:68253493:C:T	t	c	1.857e-18	-0.0736	chr10	68253493	0.929043	autoRNFL_q3	chr10:68253493:C:T	68098183	68868604	770.421	10	68253493	1	10	68253493	1	1	1	SLC25A16	0	0	0	0		0		1	1	SLC25A16 (e)	SLC25A16 (e,max_CLPP=0.01)	SLC25A16 (e[1+])	SLC25A16 (e[1+],max_CLPP=0.01)	SLC25A16	Retina
EUR	chr10:68263296:A:G	a	g	9.644e-16	-0.0681	chr10	68263296	0.934167	mocoRNFL_q1	chr10:68263296:A:G	68098183	68868604	770.421	10	68263296	3	10	68263296	3	1	1	SLC25A16	0	0	0	0		0		3	1	SLC25A16 (e)	SLC25A16 (e,max_CLPP=0.17)	SLC25A16 (e[1-])	SLC25A16 (e[1-],max_CLPP=0.17)	SLC25A16	Retina
EUR	chr10:68263296:A:G	a	g	4.624e-25	-0.0877	chr10	68263296	0.916036	autoRNFL_q6	chr10:68263296:A:G	68098183	68868604	770.421	10	68263296	1	10	68263296	1	1	1	SLC25A16	0	0	0	0		0		1	1	SLC25A16 (e)	SLC25A16 (e,max_CLPP=0.62)	SLC25A16 (e[1-])	SLC25A16 (e[1-],max_CLPP=0.62)	SLC25A16	Retina
EUR	chr17:81619201:TA:T	t	ta	4.088e-10	-0.0493	chr17	81619201	0.951896	autoGCC_q6	chr17:81619201:TA:T	81418853	81779444	360.591	17	81619201	2	17	81619201	2	1	1	RP13-1032I1.11	0	0	0	0		0		2	1	RP13-1032I1.11 (e)	RP13-1032I1.11 (e,max_CLPP=0.02)	RP13-1032I1.11 (e[1-])	RP13-1032I1.11 (e[1-],max_CLPP=0.02)	RP13-1032I1.11	Retina
EUR	chr17:81562724:G:A	a	g	1.015e-08	0.0663	chr17	81562724	1.06855	autoGCC_q8	chr17:81562724:G:A	81413132	81772846	359.714	17	81562724	3	17	81562724	3	1	1	RP13-1032I1.11	0	0	0	0		0		3	1	RP13-1032I1.11 (e)	RP13-1032I1.11 (e,max_CLPP=0.02)	RP13-1032I1.11 (e[1-])	RP13-1032I1.11 (e[1-],max_CLPP=0.02)	RP13-1032I1.11	Retina
EUR	chr17:81647906:TTAAC:T	t	ttaac	1.711e-15	-0.0621	chr17	81647906	0.939789	autoGCC_q8	chr17:81647906:T:TTAAC	81418853	81779444	360.591	17	81647906	3	17	81647906	3	1	1	RP13-1032I1.11	0	0	0	0		0		3	1	RP13-1032I1.11 (e)	RP13-1032I1.11 (e,max_CLPP=0.02)	RP13-1032I1.11 (e[1-])	RP13-1032I1.11 (e[1-],max_CLPP=0.02)	RP13-1032I1.11	Retina
EUR	chr17:81562724:G:A	a	g	1.608e-11	-0.0781	chr17	81562724	0.924872	autoGCC_q3	chr17:81562724:G:A	81413132	81772846	359.714	17	81562724	3	17	81562724	3	1	1	RP13-1032I1.11	0	0	0	0		0		3	1	RP13-1032I1.11 (e)	RP13-1032I1.11 (e,max_CLPP=0.03)	RP13-1032I1.11 (e[1+])	RP13-1032I1.11 (e[1+],max_CLPP=0.03)	RP13-1032I1.11	Retina
EUR	chr17:81647906:TTAAC:T	t	ttaac	8.44e-22	0.075	chr17	81647906	1.07788	autoGCC_q3	chr17:81647906:T:TTAAC	81418853	81779444	360.591	17	81647906	3	17	81647906	3	1	1	RP13-1032I1.11	0	0	0	0		0		3	1	RP13-1032I1.11 (e)	RP13-1032I1.11 (e,max_CLPP=0.03)	RP13-1032I1.11 (e[1+])	RP13-1032I1.11 (e[1+],max_CLPP=0.03)	RP13-1032I1.11	Retina
EUR	chr14:59270382:G:A	a	g	1.436e-08	-0.0577	chr14	59270382	0.943933	autoGCC_q2	chr14:59270382:G:A	58935814	59617355	681.541	14	59270382	3	14	59270382	3	2	2	L3HYPDH,GPR135	0	0	0	0		0		3	2	GPR135 (e), L3HYPDH (e)	GPR135 (e,max_CLPP=0.31), L3HYPDH (e,max_CLPP=0.32)	GPR135 (e[1+]), L3HYPDH (e[1+])	GPR135 (e[1+],max_CLPP=0.31), L3HYPDH (e[1+],max_CLPP=0.32)	GPR135	Retina
EUR	chr14:59270382:G:A	a	g	1.436e-08	-0.0577	chr14	59270382	0.943933	autoGCC_q2	chr14:59270382:G:A	58935814	59617355	681.541	14	59270382	3	14	59270382	3	2	2	L3HYPDH,GPR135	0	0	0	0		0		3	2	GPR135 (e), L3HYPDH (e)	GPR135 (e,max_CLPP=0.31), L3HYPDH (e,max_CLPP=0.32)	GPR135 (e[1+]), L3HYPDH (e[1+])	GPR135 (e[1+],max_CLPP=0.31), L3HYPDH (e[1+],max_CLPP=0.32)	L3HYPDH	Retina
EUR	chr10:68263296:A:G	a	g	3.084e-13	-0.0618	chr10	68263296	0.940071	mocoRNFL_q9	chr10:68263296:A:G	68098183	68868604	770.421	10	68263296	3	10	68263296	3	1	1	SLC25A16	0	0	0	0		0		3	1	SLC25A16 (e)	SLC25A16 (e,max_CLPP=0.08)	SLC25A16 (e[1-])	SLC25A16 (e[1-],max_CLPP=0.08)	SLC25A16	Retina
EUR	chr17:81562261:G:A	a	g	5.681e-09	-0.0669	chr17	81562261	0.935289	autoGCC_q0	chr17:81562261:G:A	81413132	81772846	359.714	17	81562261	3	17	81562261	3	1	1	RP13-1032I1.11	0	0	0	0		0		3	1	RP13-1032I1.11 (e)	RP13-1032I1.11 (e,max_CLPP=0.03)	RP13-1032I1.11 (e[1+])	RP13-1032I1.11 (e[1+],max_CLPP=0.03)	RP13-1032I1.11	Retina
EUR	chr17:81647906:TTAAC:T	t	ttaac	1.414e-21	0.0737	chr17	81647906	1.07648	autoGCC_q0	chr17:81647906:T:TTAAC	81418853	81779444	360.591	17	81647906	3	17	81647906	3	1	1	RP13-1032I1.11	0	0	0	0		0		3	1	RP13-1032I1.11 (e)	RP13-1032I1.11 (e,max_CLPP=0.03)	RP13-1032I1.11 (e[1+])	RP13-1032I1.11 (e[1+],max_CLPP=0.03)	RP13-1032I1.11	Retina
EUR	chr15:27985172:C:T	t	c	2.52e-08	-0.0745	chr15	27985172	0.928207	autoGCC_q4	chr15:27985172:C:T	27684286	28789849	1105.56	15	27985172	1	15	27985172	1	1	1	HERC2P9	0	0	0	0		0		1	1	HERC2P9 (e)	HERC2P9 (e,max_CLPP=0.01)	HERC2P9 (e[1-])	HERC2P9 (e[1-],max_CLPP=0.01)	HERC2P9	Retina
EUR	chr17:81644245:A:G	a	g	4.123e-11	0.051	chr17	81644245	1.05232	autoGCC_q4	chr17:81644245:A:G	81418853	81779444	360.591	17	81644245	3	17	81644245	3	1	1	RP13-1032I1.11	0	0	0	0		0		3	1	RP13-1032I1.11 (e)	RP13-1032I1.11 (e,max_CLPP=0.02)	RP13-1032I1.11 (e[1-])	RP13-1032I1.11 (e[1-],max_CLPP=0.02)	RP13-1032I1.11	Retina
Cross-ancestry	chr14:74070028:C:T	t	c	2.105e-09	-0.065	chr14	74070028	0.937067	autoRNFL_q4	chr14:74126422:A:G	73700162	74706180	1006.02	14	74070028	2	14	74070028	2	2	2	PTGR2,RP5-1021I20.4	0	0	0	0		0		2	2	PTGR2 (e), RP5-1021I20.4 (e)	PTGR2 (e,max_CLPP=0.04), RP5-1021I20.4 (e,max_CLPP=0.01)	PTGR2 (e[1+]), RP5-1021I20.4 (e[1+])	PTGR2 (e[1+],max_CLPP=0.04), RP5-1021I20.4 (e[1+],max_CLPP=0.01)	PTGR2	Retina
Cross-ancestry	chr14:74070028:C:T	t	c	2.105e-09	-0.065	chr14	74070028	0.937067	autoRNFL_q4	chr14:74126422:A:G	73700162	74706180	1006.02	14	74070028	2	14	74070028	2	2	2	PTGR2,RP5-1021I20.4	0	0	0	0		0		2	2	PTGR2 (e), RP5-1021I20.4 (e)	PTGR2 (e,max_CLPP=0.04), RP5-1021I20.4 (e,max_CLPP=0.01)	PTGR2 (e[1+]), RP5-1021I20.4 (e[1+])	PTGR2 (e[1+],max_CLPP=0.04), RP5-1021I20.4 (e[1+],max_CLPP=0.01)	RP5-1021I20.4	Retina
Cross-ancestry	chr14:59270382:G:A	a	g	2.91e-08	-0.0518	chr14	59270382	0.949519	autoGCC_q10	chr14:59336116:C:T	59164061	59497831	333.77	14	59270382	1	14	59270382	1	1	1	L3HYPDH	0	0	0	0		0		1	1	L3HYPDH (e)	L3HYPDH (e,max_CLPP=0.06)	L3HYPDH (e[1+])	L3HYPDH (e[1+],max_CLPP=0.06)	L3HYPDH	Retina
Cross-ancestry	chr14:74199522:T:C	t	c	4.47e-08	-0.0613	chr14	74199522	0.940541	mocoRNFL_q5	chr14:74126422:A:G	73700162	74706180	1006.02	14	74199522	1	14	74199522	1	1	1	PTGR2	0	0	0	0		0		1	1	PTGR2 (e)	PTGR2 (e,max_CLPP=0.6)	PTGR2 (e[1-])	PTGR2 (e[1-],max_CLPP=0.6)	PTGR2	Retina
Cross-ancestry	chr14:74199522:T:C	t	c	1.175e-08	0.063	chr14	74199522	1.06503	autoRNFL_q1	chr14:74126422:A:G	73700162	74706180	1006.02	14	74199522	2	14	74199522	2	2	2	LIN52,BBOF1	0	0	0	0		0		2	2	BBOF1 (e), LIN52 (e)	BBOF1 (e,max_CLPP=0.06), LIN52 (e,max_CLPP=0.06)	BBOF1 (e[1-]), LIN52 (e[1-])	BBOF1 (e[1-],max_CLPP=0.06), LIN52 (e[1-],max_CLPP=0.06)	BBOF1	Retina
Cross-ancestry	chr14:74199522:T:C	t	c	1.175e-08	0.063	chr14	74199522	1.06503	autoRNFL_q1	chr14:74126422:A:G	73700162	74706180	1006.02	14	74199522	2	14	74199522	2	2	2	LIN52,BBOF1	0	0	0	0		0		2	2	BBOF1 (e), LIN52 (e)	BBOF1 (e,max_CLPP=0.06), LIN52 (e,max_CLPP=0.06)	BBOF1 (e[1-]), LIN52 (e[1-])	BBOF1 (e[1-],max_CLPP=0.06), LIN52 (e[1-],max_CLPP=0.06)	LIN52	Retina
Cross-ancestry	chr10:68281826:C:T	t	c	5.301e-09	-0.0485	chr10	68281826	0.952657	autoGCC_q8	chr10:68282506:A:G	68156426	68422247	265.821	10	68281826	1	10	68281826	1	1	1	MYPN	0	0	0	0		0		1	1	MYPN (e)	MYPN (e,max_CLPP=0.01)	MYPN (e[1+])	MYPN (e[1+],max_CLPP=0.01)	MYPN	Retina
Cross-ancestry	chr14:59268154:G:C	c	g	1.856e-09	-0.0588	chr14	59268154	0.942895	autoGCC_q2	chr14:59268292:A:G	59169037	59497360	328.323	14	59268154	1	14	59268154	1	1	1	L3HYPDH	0	0	0	0		0		1	1	L3HYPDH (e)	L3HYPDH (e,max_CLPP=0.02)	L3HYPDH (e[1+])	L3HYPDH (e[1+],max_CLPP=0.02)	L3HYPDH	Retina
Cross-ancestry	chr14:60498124:TG:T	t	tg	1.396e-08	-0.0434	chr14	60498124	0.957528	autoGCC_q2	chr14:60498085:C:T	59846141	60865307	1019.17	14	60498124	1	14	60498124	1	1	1	RP11-1042B17.3	0	0	0	0		0		1	1	RP11-1042B17.3 (e)	RP11-1042B17.3 (e,max_CLPP=0.05)	RP11-1042B17.3 (e[1+])	RP11-1042B17.3 (e[1+],max_CLPP=0.05)	RP11-1042B17.3	Retina
Cross-ancestry	chr10:68281826:C:T	t	c	6.2e-10	-0.051	chr10	68281826	0.950279	autoGCC_q4	chr10:68282506:A:G	68156426	68422247	265.821	10	68281826	1	10	68281826	1	1	1	MYPN	0	0	0	0		0		1	1	MYPN (e)	MYPN (e,max_CLPP=0.01)	MYPN (e[1+])	MYPN (e[1+],max_CLPP=0.01)	MYPN	Retina
