# Supplementary material for: Deep-learning-derived glaucoma-related endophenotypes enable novel genome-wide genetic and functional discovery
Source: Research Square preprint supplement (doi:10.21203/rs.3.rs-8311177/v1), 2026-01-22
Supplement: Supplementary file 9 [file SI_File_8.xlsx]

## Sheet: ECLIPSER_CA_5e-8_GWAS_enrichmen
GWAS	Tissue	Cell type	Cell type description	Enrichment p-value	BH adj. Enrichment p-value (tissue-wide)	BH adj. Enrichment P-value (Experiment-wide)	Fold-enrichment	Fold-enrichment lower 95% CI	Fold-enrichment upper 95% CI	Average GWAS locus set statistic	Fraction of GWAS loci >95% percentile of null loci	Leading edge genes	Num of leading edge genes	Leading edge genes source	Leading edge GWAS loci	Num of leading edge GWAS loci
GCC	Retina	RPE	retinal pigment epithelium	0.000268	0.00402	0.054136	9.24873	3.38301	15.3948	0.5	0.5	SLC6A20;OCA2;NPLOC4	3	o;o;se	chr3_45767837_C_A_b38,chr3_45772602_G_A_b38,chr3_45771022_G_A_b38;chr15_27985172_C_T_b38;chr17_81562724_G_A_b38	3
GCC	AnteriorSegment	Iris_Sphincter	iris Sphincter muscle cells	0.000665	0.025935	0.067165	7.25005	2.65665	12.0513	0.416667	0.5	NR3C2;OCA2;SLC25A12,DYNC1I2	4	e;o;e,seo	chr4_147970941_G_A_b38;chr15_27985172_C_T_b38;chr2_171928495_T_A_b38,chr2_171812205_T_G_b38,chr2_172046366_A_G_b38,chr2_171718676_G_A_b38,chr2_171707412_G_A_b38,chr2_171693120_T_A_b38,chr2_171707511_A_T_b38	3
GCC	Macula	RPE	retinal pigment epithelium	0.003417	0.037587	0.133522	4.73997	1.73791	7.83677	0.5	0.5	SLC6A20;NPLOC4;OCA2	3	o;se;o	chr3_45767837_C_A_b38,chr3_45772602_G_A_b38,chr3_45771022_G_A_b38;chr17_81562724_G_A_b38;chr15_27985172_C_T_b38	3
GCC	AnteriorSegment	CB_NPCE	ciliary body non-pigmented ciliary epithelium	0.003947	0.0769665	0.133522	7.204	1.94961	14.2806	0.333333	0.333333	SLC6A20;OCA2	2	o;o	chr3_45767837_C_A_b38,chr3_45772602_G_A_b38,chr3_45771022_G_A_b38;chr15_27985172_C_T_b38	2
GCC	OpticNerveHead	17-Fibro	fibroblasts, cluster 17	0.003956	0.075792	0.133522	7.18469	1.94918	14.2292	0.333333	0.333333	NR3C2;SLC6A20	2	e;o	chr4_147970941_G_A_b38;chr3_45767837_C_A_b38,chr3_45772602_G_A_b38,chr3_45771022_G_A_b38	2
RNFL	OpticNerveHead	17-Fibro	fibroblasts, cluster 17	0.003966	0.142776	0.133522	7.17914	1.94323	14.2277	0.333333	0.333333	RSPO2;NR3C2	2	eo;e	chr8_108102236_T_C_b38,chr8_108094573_G_A_b38,chr8_108281809_C_T_b38,chr8_108279863_C_T_b38;chr4_147970941_G_A_b38	2
GCC	OpticNerveHead	3-Melanocyte	melanocytes, cluster 3	0.005487	0.075792	0.141759	6.42237	1.74043	12.7075	0.333333	0.333333	OCA2;NPLOC4	2	o;se	chr15_27985172_C_T_b38;chr17_81562724_G_A_b38	2
GCC	Retina	Other_RGC	all the retinal ganglion cells (RGCs) other than the ON- and OFF-MGC	0.005655	0.0424125	0.141759	6.34662	1.72204	12.5288	0.291667	0.333333	NPLOC4;SLC25A12,DYNC1I2	3	se;e,seo	chr17_81562724_G_A_b38;chr2_171928495_T_A_b38,chr2_171812205_T_G_b38,chr2_172046366_A_G_b38,chr2_171718676_G_A_b38,chr2_171707412_G_A_b38,chr2_171693120_T_A_b38,chr2_171707511_A_T_b38	2
GCC	OpticNerveHead	14-Melanocyte	melanocytes, cluster 14	0.006316	0.075792	0.141759	6.09292	1.65056	12.0403	0.375	0.333333	OCA2;NPLOC4	2	o;se	chr15_27985172_C_T_b38;chr17_81562724_G_A_b38	2
RNFL	AnteriorSegment	Goblet	goblet cells	0.008476	0.210242	0.171215	5.29194	1.47656	9.87361	0.4	0.4	NR3C2;SLC25A16	2	e;e	chr4_147970941_G_A_b38;chr10_68279137_A_G_b38,chr10_68241124_C_T_b38,chr10_68238298_A_C_b38,chr10_68281826_C_T_b38,chr10_68241883_T_C_b38,chr10_68235910_T_C_b38,chr10_68252081_A_G_b38,chr10_68280354_A_G_b38,chr10_68261045_G_A_b38	2
GCC	OpticNerveHead	22-Fibro	fibroblasts, cluster 22	0.013484	0.121356	0.202029	4.59535	1.24876	9.03969	0.333333	0.333333	SLC6A20;NR3C2	2	o;e	chr3_45767837_C_A_b38,chr3_45772602_G_A_b38,chr3_45771022_G_A_b38;chr4_147970941_G_A_b38	2
RNFL	OpticNerveHead	12-Astro	astrocytes, cluster 12	0.013543	0.165444	0.202029	4.59147	1.25104	9.04887	0.25	0.333333	NR3C2;C14orf39	2	e;o	chr4_147970941_G_A_b38;chr14_60605940_G_A_b38	2
RNFL	OpticNerveHead	22-Fibro	fibroblasts, cluster 22	0.013787	0.165444	0.202029	4.5898	1.24267	9.0351	0.333333	0.333333	NR3C2;RSPO2	2	e;eo	chr4_147970941_G_A_b38;chr8_108102236_T_C_b38,chr8_108094573_G_A_b38,chr8_108281809_C_T_b38,chr8_108279863_C_T_b38	2
GCC	AnteriorSegment	Goblet	goblet cells	0.014002	0.182026	0.202029	4.56675	1.23782	8.9993	0.375	0.333333	NR3C2;SLC25A16	2	e;e	chr4_147970941_G_A_b38;chr10_68279137_A_G_b38,chr10_68281826_C_T_b38,chr10_68252081_A_G_b38,chr10_68280354_A_G_b38,chr10_68261045_G_A_b38	2
GCC	OpticNerveHead	30-Immune	immune cells, cluster 30	0.018066	0.130075	0.230354	4.15233	1.12639	8.16609	0.333333	0.333333	NPLOC4;NR3C2	2	se;e	chr17_81562724_G_A_b38;chr4_147970941_G_A_b38	2
RNFL	AnteriorSegment	CB_NPCE	ciliary body non-pigmented ciliary epithelium	0.033494	0.210242	0.230354	5.23612	0.854791	12.8609	0.2	0.2	C14orf39	1	o	chr14_60605940_G_A_b38	1
RNFL	AnteriorSegment	Iris_Fibro	iris fibroblasts	0.034627	0.210242	0.230354	5.17668	0.840045	12.7386	0.2	0.2	RSPO2	1	eo	chr8_108102236_T_C_b38,chr8_108094573_G_A_b38,chr8_108281809_C_T_b38,chr8_108279863_C_T_b38	1
RNFL	AnteriorSegment	Ciliary_Fibro	ciliary fibroblasts	0.038392	0.210242	0.230354	4.8609	0.79561	11.9535	0.2	0.2	RSPO2	1	eo	chr8_108102236_T_C_b38,chr8_108094573_G_A_b38,chr8_108281809_C_T_b38,chr8_108279863_C_T_b38	1
RNFL	AnteriorSegment	K_Fibro	corneal fibroblasts	0.039266	0.210242	0.230354	4.81766	0.785071	11.8454	0.2	0.2	NR3C2	1	e	chr4_147970941_G_A_b38	1
RNFL	Macula	H2	horizontal cells cluster 2	0.040013	0.440143	0.230354	4.76155	0.77475	11.7202	0.2	0.2	NR3C2	1	e	chr4_147970941_G_A_b38	1
RNFL	AnteriorSegment	Iris_PPE	iris posterior pigmented epithelium	0.041375	0.210242	0.230354	4.66497	0.762951	11.4503	0.2	0.2	C14orf39	1	o	chr14_60605940_G_A_b38	1
RNFL	AnteriorSegment	TM_Fibro	trabecular meshwork fibroblasts	0.042874	0.210242	0.230354	4.58683	0.747525	11.2281	0.2	0.2	RSPO2	1	eo	chr8_108102236_T_C_b38,chr8_108094573_G_A_b38,chr8_108281809_C_T_b38,chr8_108279863_C_T_b38	1
RNFL	AnteriorSegment	K_Endo	corneal endothelium	0.044152	0.210242	0.230354	4.5183	0.73513	11.0993	0.2	0.2	NR3C2	1	e	chr4_147970941_G_A_b38	1
GCC	Retina	Both_AC	amacrine cells with both glycinergic and GABAergic markers	0.045496	0.13133	0.230354	4.52558	0.723822	11.6071	0.166667	0.166667	OCA2	1	o	chr15_27985172_C_T_b38	1
GCC	AnteriorSegment	Lens_Fiber	lens fiber	0.045663	0.203284	0.230354	4.52313	0.720313	11.6134	0.166667	0.166667	NPLOC4	1	se	chr17_81562724_G_A_b38	1
GCC	OpticNerveHead	31-Fibro	fibroblasts, cluster 31	0.046465	0.1772	0.230354	4.47856	0.717115	11.4882	0.166667	0.166667	SLC6A20	1	o	chr3_45767837_C_A_b38,chr3_45772602_G_A_b38,chr3_45771022_G_A_b38	1
GCC	AnteriorSegment	Uveal_Melanocyte	uveal melanocytes	0.047538	0.203284	0.230354	4.40783	0.706706	11.3178	0.166667	0.166667	OCA2	1	o	chr15_27985172_C_T_b38	1
GCC	OpticNerveHead	6-Astro	astrocytes, cluster 6	0.047577	0.1772	0.230354	4.40504	0.70647	11.2892	0.166667	0.166667	NR3C2	1	e	chr4_147970941_G_A_b38	1
GCC	Retina	ON_MGC	ON-midget ganglion cells	0.047669	0.13133	0.230354	4.41291	0.703458	11.2839	0.291667	0.166667	NPLOC4	1	se	chr17_81562724_G_A_b38	1
RNFL	OpticNerveHead	8-Astro	astrocytes, cluster 8	0.047864	0.189715	0.230354	4.3907	0.705226	11.236	0.291667	0.166667	NR3C2	1	e	chr4_147970941_G_A_b38	1
RNFL	OpticNerveHead	6-Astro	astrocytes, cluster 6	0.047889	0.189715	0.230354	4.40436	0.702618	11.299	0.291667	0.166667	NR3C2	1	e	chr4_147970941_G_A_b38	1
GCC	OpticNerveHead	8-Astro	astrocytes, cluster 8	0.048162	0.1772	0.230354	4.38314	0.699945	11.2314	0.166667	0.166667	NR3C2	1	e	chr4_147970941_G_A_b38	1
RNFL	Retina	Astrocyte	astrocyte	0.048481	0.360582	0.230354	4.34755	0.697793	11.1552	0.0833333	0.166667	C14orf39	1	o	chr14_60605940_G_A_b38	1
GCC	Retina	OFF_MGC	OFF-midget ganglion cells	0.049426	0.13133	0.230354	4.3137	0.693737	11.0492	0.291667	0.166667	NPLOC4	1	se	chr17_81562724_G_A_b38	1
RNFL	OpticNerveHead	1-Astro	astrocytes, cluster 1	0.05199	0.189715	0.230354	4.19266	0.672594	10.7319	0.291667	0.166667	NR3C2	1	e	chr4_147970941_G_A_b38	1
RNFL	Retina	Gly_AC	glycinergic amacrine cells	0.052286	0.360582	0.230354	4.18709	0.670751	10.7391	0.166667	0.166667	NR3C2	1	e	chr4_147970941_G_A_b38	1
GCC	Retina	Gly_AC	glycinergic amacrine cells	0.052532	0.13133	0.230354	4.1931	0.669773	10.7325	0.166667	0.166667	NR3C2	1	e	chr4_147970941_G_A_b38	1
GCC	OpticNerveHead	1-Astro	astrocytes, cluster 1	0.052557	0.1772	0.230354	4.1875	0.665305	10.7315	0.208333	0.166667	NR3C2	1	e	chr4_147970941_G_A_b38	1
GCC	AnteriorSegment	K_Fibro	corneal fibroblasts	0.052662	0.203284	0.230354	4.15844	0.668468	10.6585	0.166667	0.166667	NR3C2	1	e	chr4_147970941_G_A_b38	1
GCC	Macula	H2	horizontal cells cluster 2	0.054358	0.298969	0.230354	4.11404	0.655253	10.5672	0.166667	0.166667	NR3C2	1	e	chr4_147970941_G_A_b38	1
RNFL	OpticNerveHead	28-Fibro	fibroblasts, cluster 28	0.054384	0.189715	0.230354	4.10244	0.658537	10.5224	0.166667	0.166667	RSPO2	1	eo	chr8_108102236_T_C_b38,chr8_108094573_G_A_b38,chr8_108281809_C_T_b38,chr8_108279863_C_T_b38	1
GCC	OpticNerveHead	28-Fibro	fibroblasts, cluster 28	0.054496	0.1772	0.230354	4.10271	0.656364	10.4992	0.166667	0.166667	NPLOC4	1	se	chr17_81562724_G_A_b38	1
GCC	OpticNerveHead	11-Astro	astrocytes, cluster 11	0.05513	0.1772	0.230354	4.0637	0.653197	10.4133	0.166667	0.166667	NR3C2	1	e	chr4_147970941_G_A_b38	1
RNFL	OpticNerveHead	11-Astro	astrocytes, cluster 11	0.055267	0.189715	0.230354	4.06746	0.651676	10.4073	0.25	0.166667	NR3C2	1	e	chr4_147970941_G_A_b38	1
GCC	AnteriorSegment	CB_PCE	ciliary body pigmented ciliary epithelium	0.055446	0.203284	0.230354	4.04603	0.649328	10.3856	0.166667	0.166667	OCA2	1	o	chr15_27985172_C_T_b38	1
GCC	AnteriorSegment	Iris_PPE	iris posterior pigmented epithelium	0.055806	0.203284	0.230354	4.02957	0.648232	10.3062	0.208333	0.166667	OCA2	1	o	chr15_27985172_C_T_b38	1
RNFL	AnteriorSegment	Ciliary_Muscle	ciliary muscle	0.057222	0.210242	0.230354	3.91282	0.642316	9.60071	0.2	0.2	NR3C2	1	e	chr4_147970941_G_A_b38	1
RNFL	AnteriorSegment	Vasc_Endo2	vascular endothelium cluster 2	0.057821	0.210242	0.230354	3.88554	0.636111	9.50779	0.2	0.2	NR3C2	1	e	chr4_147970941_G_A_b38	1
GCC	AnteriorSegment	TM_Fibro	trabecular meshwork fibroblasts	0.058058	0.203284	0.230354	3.94919	0.631588	10.1419	0.166667	0.166667	SLC6A20	1	o	chr3_45767837_C_A_b38,chr3_45772602_G_A_b38,chr3_45771022_G_A_b38	1
GCC	AnteriorSegment	K_Endo	corneal endothelium	0.059082	0.203284	0.230354	3.9056	0.625523	9.99854	0.208333	0.166667	NR3C2	1	e	chr4_147970941_G_A_b38	1
RNFL	OpticNerveHead	5-Fibro	fibroblasts, cluster 5	0.059283	0.189715	0.230354	3.88913	0.624217	9.94341	0.166667	0.166667	RSPO2	1	eo	chr8_108102236_T_C_b38,chr8_108094573_G_A_b38,chr8_108281809_C_T_b38,chr8_108279863_C_T_b38	1
RNFL	AnteriorSegment	Iris_Sphincter	iris Sphincter muscle cells	0.059299	0.210242	0.230354	3.84112	0.626044	9.40692	0.2	0.2	NR3C2	1	e	chr4_147970941_G_A_b38	1
RNFL	OpticNerveHead	10-Fibro	fibroblasts, cluster 10	0.062998	0.189715	0.232	3.76212	0.603579	9.64494	0.166667	0.166667	RSPO2	1	eo	chr8_108102236_T_C_b38,chr8_108094573_G_A_b38,chr8_108281809_C_T_b38,chr8_108279863_C_T_b38	1
GCC	OpticNerveHead	20-vEndo	vascular endothelium, cluster 20	0.064179	0.1772	0.232	3.72743	0.59852	9.51984	0.166667	0.166667	NR3C2	1	e	chr4_147970941_G_A_b38	1
RNFL	OpticNerveHead	20-vEndo	vascular endothelium, cluster 20	0.064769	0.189715	0.232	3.72103	0.595185	9.51856	0.166667	0.166667	NR3C2	1	e	chr4_147970941_G_A_b38	1
RNFL	OpticNerveHead	18-vEndo	vascular endothelium, cluster 18	0.066734	0.189715	0.232	3.64737	0.585128	9.34602	0.166667	0.166667	NR3C2	1	e	chr4_147970941_G_A_b38	1
GCC	OpticNerveHead	18-vEndo	vascular endothelium, cluster 18	0.066878	0.1772	0.232	3.65343	0.586328	9.33342	0.166667	0.166667	NR3C2	1	e	chr4_147970941_G_A_b38	1
RNFL	AnteriorSegment	Vasc_Endo1	vascular endothelium cluster 1	0.067436	0.219167	0.232	3.57457	0.584006	8.74883	0.2	0.2	NR3C2	1	e	chr4_147970941_G_A_b38	1
RNFL	OpticNerveHead	23-vEndo	vascular endothelium, cluster 23	0.068605	0.189715	0.232	3.59628	0.578524	9.18141	0.166667	0.166667	NR3C2	1	e	chr4_147970941_G_A_b38	1
GCC	OpticNerveHead	23-vEndo	vascular endothelium, cluster 23	0.068911	0.1772	0.232	3.5961	0.57505	9.18591	0.166667	0.166667	NR3C2	1	e	chr4_147970941_G_A_b38	1
RNFL	OpticNerveHead	21-vEndo	vascular endothelium, cluster 21	0.073778	0.189715	0.235725	3.4499	0.553352	8.81555	0.166667	0.166667	NR3C2	1	e	chr4_147970941_G_A_b38	1
GCC	OpticNerveHead	21-vEndo	vascular endothelium, cluster 21	0.074116	0.177878	0.235725	3.45027	0.55348	8.82576	0.166667	0.166667	NR3C2	1	e	chr4_147970941_G_A_b38	1
GCC	AnteriorSegment	Ciliary_Muscle	ciliary muscle	0.077007	0.203284	0.235725	3.38121	0.54179	8.65756	0.208333	0.166667	NR3C2	1	e	chr4_147970941_G_A_b38	1
GCC	AnteriorSegment	Conj_Melanocyte	conjunctival melanocytes	0.077512	0.203284	0.235725	3.35841	0.536802	8.58676	0.166667	0.166667	OCA2	1	o	chr15_27985172_C_T_b38	1
GCC	AnteriorSegment	Iris_APE	iris anterior pigmented epithelium	0.077903	0.203284	0.235725	3.34605	0.538534	8.54912	0.166667	0.166667	NPLOC4	1	se	chr17_81562724_G_A_b38	1
GCC	AnteriorSegment	Vasc_Endo2	vascular endothelium cluster 2	0.077955	0.203284	0.235725	3.35826	0.539339	8.5828	0.166667	0.166667	NR3C2	1	e	chr4_147970941_G_A_b38	1
GCC	AnteriorSegment	Lens_EarlyFiber	lens early fiber	0.078186	0.203284	0.235725	3.34755	0.533964	8.5511	0.166667	0.166667	NPLOC4	1	se	chr17_81562724_G_A_b38	1
RNFL	AnteriorSegment	Lymphocyte	lymphocytes	0.084617	0.253851	0.251362	3.14689	0.514538	7.68109	0.2	0.2	NR3C2	1	e	chr4_147970941_G_A_b38	1
GCC	AnteriorSegment	K_Epi-Wing1	corneal wing epithelium cluster 1	0.086666	0.204193	0.253718	3.15801	0.507388	8.06329	0.166667	0.166667	SLC6A20	1	o	chr3_45767837_C_A_b38,chr3_45772602_G_A_b38,chr3_45771022_G_A_b38	1
GCC	AnteriorSegment	Vasc_Endo1	vascular endothelium cluster 1	0.089192	0.204193	0.257383	3.09154	0.496559	7.89145	0.166667	0.166667	NR3C2	1	e	chr4_147970941_G_A_b38	1
GCC	AnteriorSegment	K_Epi-Superficial	corneal superficial epithelium	0.094243	0.204193	0.268128	3.0085	0.481824	7.68359	0.166667	0.166667	SLC6A20	1	o	chr3_45767837_C_A_b38,chr3_45772602_G_A_b38,chr3_45771022_G_A_b38	1
RNFL	AnteriorSegment	Conj_Epi-Superficial	conjunctival superficial epithelium	0.096821	0.269716	0.271637	2.90938	0.476854	7.10066	0.2	0.2	NR3C2	1	e	chr4_147970941_G_A_b38	1
RNFL	Macula	mlCones	M-cone and L-cone photoreceptors	0.098661	0.502548	0.273007	2.87288	0.473221	7.03398	0.2	0.2	NR3C2	1	e	chr4_147970941_G_A_b38	1
GCC	OpticNerveHead	12-Astro	astrocytes, cluster 12	0.100867	0.226951	0.27534	2.8815	0.463878	7.35585	0.208333	0.166667	NR3C2	1	e	chr4_147970941_G_A_b38	1
GCC	AnteriorSegment	Lymphocyte	lymphocytes	0.112456	0.230831	0.297276	2.71545	0.435375	6.94269	0.166667	0.166667	NR3C2	1	e	chr4_147970941_G_A_b38	1
GCC	OpticNerveHead	7-Immune	immune cells, cluster 7	0.112468	0.238168	0.297276	2.7044	0.434492	6.89499	0.166667	0.166667	NR3C2	1	e	chr4_147970941_G_A_b38	1
RNFL	OpticNerveHead	7-Immune	immune cells, cluster 7	0.113318	0.271019	0.297276	2.70373	0.434015	6.89028	0.166667	0.166667	NR3C2	1	e	chr4_147970941_G_A_b38	1
RNFL	OpticNerveHead	30-Immune	immune cells, cluster 30	0.120453	0.271019	0.311942	2.60954	0.417581	6.66026	0.166667	0.166667	NR3C2	1	e	chr4_147970941_G_A_b38	1
GCC	AnteriorSegment	Conj_Epi-Superficial	conjunctival superficial epithelium	0.127872	0.24935	0.326964	2.51109	0.40311	6.40863	0.166667	0.166667	NR3C2	1	e	chr4_147970941_G_A_b38	1
GCC	Macula	mlCones	M-cone and L-cone photoreceptors	0.1306	0.478867	0.329765	2.48517	0.397277	6.35375	0.166667	0.166667	NR3C2	1	e	chr4_147970941_G_A_b38	1
GCC	OpticNerveHead	24-Immune	immune cells, cluster 24	0.137961	0.275922	0.344051	2.39607	0.383983	6.11062	0.166667	0.166667	NPLOC4	1	se	chr17_81562724_G_A_b38	1
RNFL	AnteriorSegment	Pericyte1	pericytes cluster 1	0.266887	0.398303	0.454227	2.16283	0.0830591	9.19629	0	0		1			1
RNFL	AnteriorSegment	Lens_Fiber	lens fiber	0.266946	0.398303	0.454227	2.15929	0.0837968	9.17292	0	0		1			1
RNFL	AnteriorSegment	Pericyte2	pericytes cluster 2	0.268981	0.398303	0.454227	2.14896	0.0828888	9.12623	0	0		1			1
RNFL	AnteriorSegment	Uveal_Melanocyte	uveal melanocytes	0.27403	0.398303	0.454227	2.1034	0.0819538	8.93739	0	0		1			1
RNFL	AnteriorSegment	K_Conj_Epi-Superficial	corneal conjunctival superficial epithelium	0.291374	0.398303	0.454227	1.95987	0.0757268	8.33184	0	0		1			1
RNFL	AnteriorSegment	CB_PCE	ciliary body pigmented ciliary epithelium	0.294143	0.398303	0.454227	1.93431	0.0749145	8.19725	0	0		1			1
RNFL	Retina	Cone	cone photoreceptors	0.304107	0.360582	0.454227	1.8691	0.0718152	8.17901	0	0		1			1
GCC	AnteriorSegment	Pericyte1	pericytes cluster 1	0.304409	0.437503	0.454227	1.86936	0.0715538	8.17734	0	0		1			1
RNFL	Retina	Both_AC	amacrine cells with both glycinergic and GABAergic markers	0.304493	0.360582	0.454227	1.86652	0.0712451	8.17858	0	0		1			1
GCC	OpticNerveHead	29-Fibro	fibroblasts, cluster 29	0.304677	0.431845	0.454227	1.8645	0.0718791	8.15275	0	0		1			1
GCC	Retina	Cone	cone photoreceptors	0.304768	0.360249	0.454227	1.87058	0.0711164	8.18383	0	0		1			1
GCC	AnteriorSegment	Pericyte2	pericytes cluster 2	0.305195	0.437503	0.454227	1.85902	0.0715856	8.13957	0	0		1			1
RNFL	OpticNerveHead	29-Fibro	fibroblasts, cluster 29	0.305749	0.445659	0.454227	1.85814	0.0715307	8.16778	0	0		1			1
RNFL	OpticNerveHead	31-Fibro	fibroblasts, cluster 31	0.306093	0.445659	0.454227	1.85084	0.0709232	8.11419	0	0		1			1
RNFL	OpticNerveHead	33-OPC	oligodendrocyte precursor cells, cluster 33	0.306193	0.445659	0.454227	1.85277	0.071023	8.10649	0	0		1			1
GCC	OpticNerveHead	33-OPC	oligodendrocyte precursor cells, cluster 33	0.306894	0.431845	0.454227	1.85268	0.0711392	8.10965	0	0		1			1
GCC	AnteriorSegment	Iris_Fibro	iris fibroblasts	0.307356	0.437503	0.454227	1.84434	0.0707852	8.09287	0	0		1			1
RNFL	Retina	OFFBC	ON-bipolar cells	0.308726	0.360582	0.454227	1.83704	0.0701071	8.04348	0	0		1			1
GCC	OpticNerveHead	34-ACTA2	vascular smooth muscle cells (mural cells), cluster 34	0.308764	0.431845	0.454227	1.83734	0.0699621	8.03064	0	0		1			1
RNFL	OpticNerveHead	34-ACTA2	vascular smooth muscle cells (mural cells), cluster 34	0.308843	0.445659	0.454227	1.83212	0.070419	8.01364	0	0		1			1
GCC	Retina	OFFBC	ON-bipolar cells	0.309956	0.360249	0.454227	1.83315	0.0698407	8.04237	0	0		1			1
RNFL	Retina	ON_MGC	ON-midget ganglion cells	0.31084	0.360582	0.454227	1.8216	0.0707306	7.95286	0.125	0		1			1
GCC	Retina	Astrocyte	astrocyte	0.313917	0.360249	0.454227	1.80047	0.0687906	7.87268	0	0		1			1
RNFL	OpticNerveHead	15-Schwann	nonmyelinating Schwann cells, cluster 15	0.314593	0.445659	0.454227	1.79463	0.0692124	7.85091	0	0		1			1
RNFL	Retina	HC	horizontal cells	0.315081	0.360582	0.454227	1.7914	0.0688624	7.82378	0	0		1			1
GCC	OpticNerveHead	15-Schwann	nonmyelinating Schwann cells, cluster 15	0.315383	0.431845	0.454227	1.79096	0.0686595	7.83433	0	0		1			1
GCC	Retina	HC	horizontal cells	0.315528	0.360249	0.454227	1.79032	0.0677794	7.84641	0	0		1			1
RNFL	Retina	OFF_MGC	OFF-midget ganglion cells	0.317054	0.360582	0.454227	1.78249	0.0676457	7.80396	0.125	0		1			1
RNFL	AnteriorSegment	Mast	mast cells	0.317524	0.398303	0.454227	1.7667	0.069247	7.48289	0	0		1			1
RNFL	AnteriorSegment	K_Epi-Wing2	corneal wing epithelium cluster 2	0.319426	0.398303	0.454227	1.76291	0.0679691	7.46313	0	0		1			1
RNFL	AnteriorSegment	Schwann	Schwann cells	0.319602	0.398303	0.454227	1.75587	0.0662607	7.44032	0	0		1			1
GCC	OpticNerveHead	2-Oligo	oligodendrocytes, cluster 2	0.322042	0.431845	0.454227	1.74633	0.066682	7.63951	0.0416667	0		1			1
RNFL	OpticNerveHead	2-Oligo	oligodendrocytes, cluster 2	0.322271	0.445659	0.454227	1.74691	0.0666804	7.6468	0	0		1			1
RNFL	Retina	RPE	retinal pigment epithelium	0.322337	0.360582	0.454227	1.74362	0.0670762	7.64255	0	0		1			1
RNFL	AnteriorSegment	Scleral_Fibro	scleral fibroblasts	0.323613	0.398303	0.454227	1.72809	0.0667916	7.31051	0	0		1			1
GCC	AnteriorSegment	Ciliary_Fibro	ciliary fibroblasts	0.32395	0.437503	0.454227	1.73785	0.0664835	7.60763	0	0		1			1
RNFL	Retina	GABA_AC	GABAergic amacrine cells	0.330504	0.360582	0.454227	1.69319	0.0648827	7.41592	0	0		1			1
GCC	Retina	GABA_AC	GABAergic amacrine cells	0.330909	0.360249	0.454227	1.69013	0.0647048	7.38285	0	0		1			1
GCC	AnteriorSegment	K_Conj_Epi-Superficial	corneal conjunctival superficial epithelium	0.33103	0.437503	0.454227	1.68972	0.0645844	7.42127	0	0		1			1
GCC	OpticNerveHead	32-Fibro	fibroblasts, cluster 32	0.332107	0.431845	0.454227	1.68355	0.0648314	7.37468	0	0		1			1
RNFL	OpticNerveHead	32-Fibro	fibroblasts, cluster 32	0.332353	0.445659	0.454227	1.68274	0.0638319	7.38501	0	0		1			1
GCC	OpticNerveHead	35-MyeSchwann	myelinating Schwann cells, cluster 35	0.335334	0.431845	0.454227	1.66517	0.0638348	7.28509	0	0		1			1
RNFL	OpticNerveHead	3-Melanocyte	melanocytes, cluster 3	0.335546	0.445659	0.454227	1.66398	0.0635268	7.28705	0	0		1			1
RNFL	AnteriorSegment	K_Epi-Basal	corneal basal epithelium	0.335686	0.398303	0.454227	1.65587	0.0634746	7.02579	0	0		1			1
RNFL	OpticNerveHead	35-MyeSchwann	myelinating Schwann cells, cluster 35	0.335691	0.445659	0.454227	1.66362	0.0635688	7.28957	0	0		1			1
RNFL	OpticNerveHead	0-Oligo	oligodendrocytes, cluster 0	0.336343	0.445659	0.454227	1.65302	0.0633637	7.21852	0	0		1			1
GCC	Retina	ONBC	ON-bipolar cells	0.337204	0.360249	0.454227	1.65339	0.0633593	7.24484	0	0		1			1
RNFL	Retina	ONBC	ON-bipolar cells	0.337205	0.360582	0.454227	1.65358	0.0634245	7.23696	0	0		1			1
GCC	OpticNerveHead	0-Oligo	oligodendrocytes, cluster 0	0.337873	0.431845	0.454227	1.64912	0.0631272	7.21751	0.0416667	0		1			1
RNFL	Retina	Other_RGC	all the retinal ganglion cells (RGCs) other than the ON- and OFF-MGC	0.339208	0.360582	0.454227	1.64079	0.0628501	7.19357	0.0416667	0		1			1
RNFL	Macula	RGCs	retinal ganglion cells	0.340035	0.502548	0.454227	1.6302	0.062397	6.90276	0.1	0		1			1
RNFL	AnteriorSegment	Conj_Melanocyte	conjunctival melanocytes	0.345309	0.398303	0.454227	1.60151	0.0615817	6.7897	0	0		1			1
RNFL	AnteriorSegment	Lens_EarlyFiber	lens early fiber	0.345692	0.398303	0.454227	1.60016	0.0614709	6.77367	0	0		1			1
RNFL	AnteriorSegment	Iris_APE	iris anterior pigmented epithelium	0.345701	0.398303	0.454227	1.60151	0.0616579	6.76146	0	0		1			1
GCC	OpticNerveHead	5-Fibro	fibroblasts, cluster 5	0.345729	0.431845	0.454227	1.60086	0.0614958	7.01767	0	0		1			1
RNFL	AnteriorSegment	Conj_Epi-Basal	conjunctival basal epithelium	0.346091	0.398303	0.454227	1.59523	0.0615112	6.75077	0	0		1			1
RNFL	AnteriorSegment	FibroX	fibroblast X (derived from corneoscleral wedge)	0.349293	0.398303	0.454227	1.57592	0.0608168	6.65445	0	0		1			1
RNFL	OpticNerveHead	14-Melanocyte	melanocytes, cluster 14	0.349815	0.445659	0.454227	1.57892	0.0605574	6.9063	0	0		1			1
RNFL	Macula	H1	horizontal cells cluster 1	0.350285	0.502548	0.454227	1.57316	0.0609831	6.66379	0	0		1			1
RNFL	Retina	Rod	rod photoreceptors	0.351686	0.360582	0.454227	1.56901	0.0596032	6.86338	0	0		1			1
GCC	Retina	Rod	rod photoreceptors	0.351834	0.360249	0.454227	1.56796	0.0597789	6.86961	0	0		1			1
RNFL	AnteriorSegment	Schlemm_Endo	Schlemm's canal endothelium	0.353467	0.398303	0.454227	1.55587	0.0600167	6.59493	0	0		1			1
GCC	OpticNerveHead	10-Fibro	fibroblasts, cluster 10	0.354454	0.431845	0.454227	1.55329	0.059517	6.78039	0	0		1			1
RNFL	AnteriorSegment	Lymphatic_Endo	lymphatic endothelium	0.355481	0.398303	0.454227	1.54626	0.0593532	6.55477	0	0		1			1
GCC	OpticNerveHead	16-vEndo	vascular endothelium, cluster 16	0.357408	0.431845	0.454227	1.54181	0.0593232	6.7485	0	0		1			1
RNFL	OpticNerveHead	16-vEndo	vascular endothelium, cluster 16	0.357717	0.445659	0.454227	1.5378	0.0591813	6.7378	0	0		1			1
RNFL	Macula	BCs	biopolar cells	0.357757	0.502548	0.454227	1.53502	0.058937	6.52531	0	0		1			1
RNFL	Retina	Microglia	microglia	0.358197	0.360582	0.454227	1.53727	0.0590323	6.72235	0	0		1			1
GCC	Retina	Microglia	microglia	0.358342	0.360249	0.454227	1.53668	0.0591937	6.73025	0	0		1			1
GCC	OpticNerveHead	13-OPC	oligodendrocyte precursor cells, cluster 13	0.359871	0.431845	0.454227	1.52802	0.058345	6.66294	0.0416667	0		1			1
GCC	AnteriorSegment	Mast	mast cells	0.359935	0.437503	0.454227	1.52479	0.0582286	6.67941	0	0		1			1
GCC	Retina	MG	M√ºller Glia	0.360249	0.360249	0.454227	1.52666	0.0578862	6.65579	0	0		1			1
RNFL	Retina	MG	M√ºller Glia	0.360582	0.360582	0.454227	1.52348	0.0581919	6.67608	0	0		1			1
RNFL	OpticNerveHead	13-OPC	oligodendrocyte precursor cells, cluster 13	0.361888	0.445659	0.454227	1.51949	0.0580985	6.66805	0.0833333	0		1			1
GCC	AnteriorSegment	Schwann	Schwann cells	0.36206	0.437503	0.454227	1.5172	0.0588814	6.63433	0	0		1			1
RNFL	AnteriorSegment	Lens_GerminativeEpi	lens germinative epithelium	0.36219	0.398303	0.454227	1.51041	0.0593432	6.40195	0	0		1			1
GCC	AnteriorSegment	K_Epi-Wing2	corneal wing epithelium cluster 2	0.362279	0.437503	0.454227	1.51935	0.0580465	6.65909	0	0		1			1
RNFL	AnteriorSegment	K_Epi-Wing1	corneal wing epithelium cluster 1	0.362758	0.398303	0.454227	1.50932	0.0581446	6.39213	0	0		1			1
RNFL	AnteriorSegment	Lens_EquatorEpi	lens equator epithelium	0.363179	0.398303	0.454227	1.50508	0.0579608	6.3748	0	0		1			1
GCC	AnteriorSegment	Scleral_Fibro	scleral fibroblasts	0.366356	0.437503	0.454227	1.49431	0.05648	6.53151	0	0		1			1
RNFL	AnteriorSegment	Lens_AnteriorEpi	lens anterior epithelium	0.369328	0.398303	0.454227	1.47815	0.0565256	6.25703	0	0		1			1
RNFL	OpticNerveHead	27-vEndo	vascular endothelium, cluster 27	0.377418	0.445659	0.454227	1.44057	0.0552217	6.29718	0	0		1			1
GCC	OpticNerveHead	27-vEndo	vascular endothelium, cluster 27	0.37751	0.432431	0.454227	1.43949	0.0548282	6.2952	0	0		1			1
RNFL	AnteriorSegment	K_Epi-Superficial	corneal superficial epithelium	0.377877	0.398303	0.454227	1.43524	0.0554173	6.06352	0	0		1			1
GCC	AnteriorSegment	K_Epi-Basal	corneal basal epithelium	0.378326	0.437503	0.454227	1.43626	0.0553175	6.26998	0	0		1			1
RNFL	OpticNerveHead	9-Immune	immune cells, cluster 9	0.383762	0.445659	0.454227	1.40904	0.0540337	6.16058	0	0		1			1
GCC	Macula	RGCs	retinal ganglion cells	0.383979	0.557655	0.454227	1.41062	0.0542572	6.17602	0.0555556	0		1			1
GCC	OpticNerveHead	9-Immune	immune cells, cluster 9	0.384383	0.432431	0.454227	1.40972	0.0539489	6.15846	0	0		1			1
RNFL	Macula	sCones	S-cone photoreceptors	0.385326	0.502548	0.454227	1.40251	0.0541796	5.93816	0.1	0		1			1
GCC	AnteriorSegment	Conj_Epi-Basal	conjunctival basal epithelium	0.390731	0.437503	0.454227	1.37984	0.0532738	6.04573	0	0		1			1
GCC	Macula	H1	horizontal cells cluster 1	0.395698	0.557655	0.454227	1.35897	0.051873	5.95912	0	0		1			1
GCC	AnteriorSegment	FibroX	fibroblast X (derived from corneoscleral wedge)	0.395876	0.437503	0.454227	1.3575	0.0519263	5.93718	0	0		1			1
GCC	AnteriorSegment	Schlemm_Endo	Schlemm's canal endothelium	0.3986	0.437503	0.454227	1.34611	0.0517293	5.87392	0	0		1			1
GCC	AnteriorSegment	Lymphatic_Endo	lymphatic endothelium	0.4011	0.437503	0.454227	1.33436	0.0509581	5.84532	0	0		1			1
RNFL	AnteriorSegment	Conj_Epi-Wing	conjunctival wing epithelium	0.401614	0.408035	0.454227	1.33126	0.0512077	5.62624	0	0		1			1
GCC	Macula	BCs	biopolar cells	0.401876	0.557655	0.454227	1.33302	0.0505573	5.82331	0	0		1			1
RNFL	OpticNerveHead	19-ACTA2	vascular smooth muscle cells (mural cells), cluster 19	0.403207	0.453608	0.454227	1.32505	0.0511115	5.78387	0	0		1			1
GCC	OpticNerveHead	19-ACTA2	vascular smooth muscle cells (mural cells), cluster 19	0.403455	0.440133	0.454227	1.32687	0.0506417	5.78871	0	0		1			1
GCC	AnteriorSegment	Lens_GerminativeEpi	lens germinative epithelium	0.408008	0.437503	0.454227	1.30791	0.0503866	5.71211	0	0		1			1
RNFL	AnteriorSegment	M√∏		0.408035	0.408035	0.454227	1.30489	0.0504869	5.53329	0	0		1			1
GCC	AnteriorSegment	Lens_EquatorEpi	lens equator epithelium	0.409254	0.437503	0.454227	1.30279	0.0496787	5.67977	0	0		1			1
GCC	AnteriorSegment	Lens_AnteriorEpi	lens anterior epithelium	0.415067	0.437503	0.458161	1.27846	0.0492432	5.59694	0	0		1			1
GCC	OpticNerveHead	26-ACTA2	pericytes (mural cells), cluster 26	0.428523	0.44979	0.468402	1.227	0.0467996	5.35814	0	0		1			1
RNFL	OpticNerveHead	26-ACTA2	pericytes (mural cells), cluster 26	0.429261	0.464037	0.468402	1.22551	0.0473617	5.35227	0	0		1			1
GCC	Macula	sCones	S-cone photoreceptors	0.433298	0.557655	0.468402	1.21082	0.0456099	5.30649	0	0		1			1
RNFL	Macula	Rods	rod photoreceptor cells	0.435185	0.502548	0.468402	1.20184	0.0462102	5.08933	0.1	0		1			1
GCC	OpticNerveHead	4-Immune	immune cells, cluster 4	0.437296	0.44979	0.468402	1.19673	0.0455869	5.19237	0	0		1			1
RNFL	OpticNerveHead	4-Immune	immune cells, cluster 4	0.438257	0.464037	0.468402	1.19257	0.0450658	5.20264	0	0		1			1
RNFL	Macula	ACs	amacrine cells	0.440614	0.502548	0.468442	1.18107	0.0456829	5.00087	0	0		1			1
GCC	AnteriorSegment	Conj_Epi-Wing	conjunctival wing epithelium	0.450605	0.457521	0.476556	1.14948	0.0438665	5.02461	0	0		1			1
GCC	AnteriorSegment	M√∏		0.457521	0.457521	0.48135	1.12597	0.0432135	4.93071	0	0		1			1
GCC	OpticNerveHead	25-Immune	immune cells, cluster 25	0.469886	0.469886	0.490027	1.08803	0.0417144	4.74612	0	0		1			1
RNFL	OpticNerveHead	25-Immune	immune cells, cluster 25	0.47062	0.484066	0.490027	1.08577	0.0416927	4.75328	0	0		1			1
RNFL	Macula	Astrocyte	astrocyte	0.480799	0.502548	0.498058	1.05464	0.0409641	4.45274	0.1	0		1			1
GCC	Macula	Rods	rod photoreceptor cells	0.485977	0.557655	0.500703	1.03925	0.0396707	4.53027	0	0		1			1
RNFL	Macula	RPE	retinal pigment epithelium	0.488309	0.502548	0.500703	1.03267	0.0399812	4.37998	0	0		1			1
GCC	Macula	ACs	amacrine cells	0.491677	0.557655	0.50161	1.02323	0.039231	4.44523	0	0		1			1
RNFL	Macula	Muller	M√ºller Glia	0.502548	0.502548	0.508905	0.993321	0.0382615	4.19444	0	0		1			1
RNFL	OpticNerveHead	24-Immune	immune cells, cluster 24	0.503866	0.503866	0.508905	0.989438	0.0380606	4.30787	0	0		1			1
GCC	Macula	Astrocyte	astrocyte	0.535402	0.557655	0.538066	0.909318	0.0346317	3.96263	0.0555556	0		1			1
GCC	Macula	Muller	M√ºller Glia	0.557655	0.557655	0.557655	0.856507	0.0330619	3.74043	0	0		1			1

## Sheet: ECLIPSER_EUR_5e-8_GWAS_enrichme
GWAS	Tissue	Cell type	Cell type description	Enrichment p-value	BH adj. Enrichment p-value (tissue-wide)	BH adj. Enrichment P-value (Experiment-wide)	Fold-enrichment	Fold-enrichment lower 95% CI	Fold-enrichment upper 95% CI	Average GWAS locus set statistic	Fraction of GWAS loci >95% percentile of null loci	Leading edge genes	Num of leading edge genes	Leading edge genes source	Leading edge GWAS loci	Num of leading edge GWAS loci
GCC	Retina	RPE	retinal pigment epithelium	0.000637	0.009555	0.054742	11.3416	3.57213	17.6926	0.5	0.666667	OCA2;NPLOC4	2	o;seo	chr15_27985172_C_T_b38;chr17_81605227_G_A_b38,chr17_81559795_C_T_b38,chr17_81616447_T_C_b38,chr17_81648542_A_G_b38,chr17_81644300_G_A_b38,chr17_81639794_T_C_b38,chr17_81582224_G_A_b38,chr17_81562261_G_A_b38,chr17_81635037_G_T_b38,chr17_81597904_C_G_b38,chr17_81590017_C_A_b38,chr17_81563967_G_T_b38,chr17_81645371_A_G_b38,chr17_81562724_G_A_b38,chr17_81618466_A_G_b38,chr17_81587245_G_A_b38,chr17_81…	2
GCC	OpticNerveHead	3-Melanocyte	melanocytes, cluster 3	0.000714	0.014634	0.054742	10.8212	3.4136	16.88	0.666667	0.666667	OCA2;NPLOC4,TSPAN10	3	o;seo,eo	chr15_27985172_C_T_b38;chr17_81605227_G_A_b38,chr17_81559795_C_T_b38,chr17_81616447_T_C_b38,chr17_81648542_A_G_b38,chr17_81644300_G_A_b38,chr17_81639794_T_C_b38,chr17_81582224_G_A_b38,chr17_81562261_G_A_b38,chr17_81635037_G_T_b38,chr17_81597904_C_G_b38,chr17_81590017_C_A_b38,chr17_81563967_G_T_b38,chr17_81645371_A_G_b38,chr17_81562724_G_A_b38,chr17_81618466_A_G_b38,chr17_81587245_G_A_b38,chr17_81…	2
GCC	OpticNerveHead	14-Melanocyte	melanocytes, cluster 14	0.000813	0.014634	0.054742	10.268	3.23824	15.9949	0.666667	0.666667	OCA2;NPLOC4,TSPAN10	3	o;seo,eo	chr15_27985172_C_T_b38;chr17_81605227_G_A_b38,chr17_81559795_C_T_b38,chr17_81616447_T_C_b38,chr17_81648542_A_G_b38,chr17_81644300_G_A_b38,chr17_81639794_T_C_b38,chr17_81582224_G_A_b38,chr17_81562261_G_A_b38,chr17_81635037_G_T_b38,chr17_81597904_C_G_b38,chr17_81590017_C_A_b38,chr17_81563967_G_T_b38,chr17_81645371_A_G_b38,chr17_81562724_G_A_b38,chr17_81618466_A_G_b38,chr17_81587245_G_A_b38,chr17_81…	2
GCC	Macula	RPE	retinal pigment epithelium	0.001163	0.012793	0.0587315	7.50312	2.76367	9.77012	1	1	NPLOC4,TSPAN10;OCA2	3	seo,eo;o	chr17_81605227_G_A_b38,chr17_81559795_C_T_b38,chr17_81616447_T_C_b38,chr17_81648542_A_G_b38,chr17_81644300_G_A_b38,chr17_81639794_T_C_b38,chr17_81582224_G_A_b38,chr17_81562261_G_A_b38,chr17_81635037_G_T_b38,chr17_81597904_C_G_b38,chr17_81590017_C_A_b38,chr17_81563967_G_T_b38,chr17_81645371_A_G_b38,chr17_81562724_G_A_b38,chr17_81618466_A_G_b38,chr17_81587245_G_A_b38,chr17_81611261_G_A_b38,chr17_81…	2
GCC	Retina	Both_AC	amacrine cells with both glycinergic and GABAergic markers	0.013986	0.092425	0.237034	7.63883	1.34853	16.1863	0.333333	0.333333	OCA2	1	o	chr15_27985172_C_T_b38	1
GCC	AnteriorSegment	CB_NPCE	ciliary body non-pigmented ciliary epithelium	0.014311	0.111735	0.237034	7.63813	1.33398	16.2369	0.333333	0.333333	OCA2	1	o	chr15_27985172_C_T_b38	1
RNFL	AnteriorSegment	CB_NPCE	ciliary body non-pigmented ciliary epithelium	0.014461	0.146445	0.237034	7.6291	1.32821	16.213	0.333333	0.333333	C14orf39	1	eo	chr14_60606157_T_C_b38,chr14_60490561_C_T_b38,chr14_60628456_G_C_b38,chr14_60340258_C_T_b38,chr14_60331291_T_G_b38,chr14_60555173_A_G_b38,chr14_60329930_T_C_b38,chr14_60380283_C_T_b38,chr14_60558899_A_G_b38,chr14_60341147_T_G_b38,chr14_60537171_G_C_b38,chr14_60509819_C_A_b38,chr14_60419432_T_C_b38,chr14_60624683_G_A_b38,chr14_60325385_A_G_b38,chr14_60642107_C_A_b38	1
GCC	AnteriorSegment	Lens_Fiber	lens fiber	0.014463	0.111735	0.237034	7.64201	1.32962	16.2327	0.5	0.333333	METTL22	1	e	chr16_8622271_A_G_b38	1
RNFL	AnteriorSegment	Iris_Fibro	iris fibroblasts	0.014856	0.146445	0.237034	7.55586	1.31505	16.0697	0.333333	0.333333	RSPO2	1	eo	chr8_108279863_C_T_b38,chr8_108102236_T_C_b38,chr8_108094573_G_A_b38,chr8_108170015_T_C_b38	1
GCC	AnteriorSegment	Uveal_Melanocyte	uveal melanocytes	0.015124	0.111735	0.237034	7.44385	1.30234	15.8163	0.5	0.333333	OCA2	1	o	chr15_27985172_C_T_b38	1
RNFL	AnteriorSegment	Ciliary_Fibro	ciliary fibroblasts	0.016448	0.146445	0.237034	7.09601	1.23938	15.0599	0.333333	0.333333	RSPO2	1	eo	chr8_108279863_C_T_b38,chr8_108102236_T_C_b38,chr8_108094573_G_A_b38,chr8_108170015_T_C_b38	1
GCC	AnteriorSegment	CB_PCE	ciliary body pigmented ciliary epithelium	0.017606	0.111735	0.237034	6.83468	1.20137	14.4796	0.333333	0.333333	OCA2	1	o	chr15_27985172_C_T_b38	1
RNFL	AnteriorSegment	Iris_PPE	iris posterior pigmented epithelium	0.017883	0.146445	0.237034	6.79399	1.18837	14.4171	0.333333	0.333333	C14orf39	1	eo	chr14_60606157_T_C_b38,chr14_60490561_C_T_b38,chr14_60628456_G_C_b38,chr14_60340258_C_T_b38,chr14_60331291_T_G_b38,chr14_60555173_A_G_b38,chr14_60329930_T_C_b38,chr14_60380283_C_T_b38,chr14_60558899_A_G_b38,chr14_60341147_T_G_b38,chr14_60537171_G_C_b38,chr14_60509819_C_A_b38,chr14_60419432_T_C_b38,chr14_60624683_G_A_b38,chr14_60325385_A_G_b38,chr14_60642107_C_A_b38	1
GCC	AnteriorSegment	Iris_PPE	iris posterior pigmented epithelium	0.017921	0.111735	0.237034	6.8049	1.19002	14.449	0.5	0.333333	OCA2	1	o	chr15_27985172_C_T_b38	1
GCC	Retina	Other_RGC	all the retinal ganglion cells (RGCs) other than the ON- and OFF-MGC	0.018485	0.092425	0.237034	6.725	1.17158	14.2269	0.166667	0.333333	NPLOC4	1	seo	chr17_81605227_G_A_b38,chr17_81559795_C_T_b38,chr17_81616447_T_C_b38,chr17_81648542_A_G_b38,chr17_81644300_G_A_b38,chr17_81639794_T_C_b38,chr17_81582224_G_A_b38,chr17_81562261_G_A_b38,chr17_81635037_G_T_b38,chr17_81597904_C_G_b38,chr17_81590017_C_A_b38,chr17_81563967_G_T_b38,chr17_81645371_A_G_b38,chr17_81562724_G_A_b38,chr17_81618466_A_G_b38,chr17_81587245_G_A_b38,chr17_81611261_G_A_b38,chr17_81…	1
RNFL	AnteriorSegment	TM_Fibro	trabecular meshwork fibroblasts	0.018775	0.146445	0.237034	6.68127	1.16344	14.1569	0.333333	0.333333	RSPO2	1	eo	chr8_108279863_C_T_b38,chr8_108102236_T_C_b38,chr8_108094573_G_A_b38,chr8_108170015_T_C_b38	1
RNFL	OpticNerveHead	17-Fibro	fibroblasts, cluster 17	0.023373	0.29556	0.248027	6.19573	1.03647	14.3359	0.25	0.25	RSPO2	1	eo	chr8_108279863_C_T_b38,chr8_108102236_T_C_b38,chr8_108094573_G_A_b38,chr8_108170015_T_C_b38	1
GCC	AnteriorSegment	Conj_Melanocyte	conjunctival melanocytes	0.025477	0.111735	0.248027	5.67079	0.990024	11.9937	0.333333	0.333333	OCA2	1	o	chr15_27985172_C_T_b38	1
GCC	AnteriorSegment	Iris_APE	iris anterior pigmented epithelium	0.025535	0.111735	0.248027	5.64487	0.989421	11.9267	0.333333	0.333333	NPLOC4,TSPAN10	2	seo,eo	chr17_81605227_G_A_b38,chr17_81559795_C_T_b38,chr17_81616447_T_C_b38,chr17_81648542_A_G_b38,chr17_81644300_G_A_b38,chr17_81639794_T_C_b38,chr17_81582224_G_A_b38,chr17_81562261_G_A_b38,chr17_81635037_G_T_b38,chr17_81597904_C_G_b38,chr17_81590017_C_A_b38,chr17_81563967_G_T_b38,chr17_81645371_A_G_b38,chr17_81562724_G_A_b38,chr17_81618466_A_G_b38,chr17_81587245_G_A_b38,chr17_81611261_G_A_b38,chr17_81…	1
GCC	AnteriorSegment	Lens_EarlyFiber	lens early fiber	0.025573	0.111735	0.248027	5.64585	0.988781	11.9563	0.166667	0.333333	NPLOC4	1	seo	chr17_81605227_G_A_b38,chr17_81559795_C_T_b38,chr17_81616447_T_C_b38,chr17_81648542_A_G_b38,chr17_81644300_G_A_b38,chr17_81639794_T_C_b38,chr17_81582224_G_A_b38,chr17_81562261_G_A_b38,chr17_81635037_G_T_b38,chr17_81597904_C_G_b38,chr17_81590017_C_A_b38,chr17_81563967_G_T_b38,chr17_81645371_A_G_b38,chr17_81562724_G_A_b38,chr17_81618466_A_G_b38,chr17_81587245_G_A_b38,chr17_81611261_G_A_b38,chr17_81…	1
GCC	AnteriorSegment	Iris_Sphincter	iris Sphincter muscle cells	0.025785	0.111735	0.248027	5.6028	0.9838	11.8466	0.333333	0.333333	OCA2	1	o	chr15_27985172_C_T_b38	1
RNFL	OpticNerveHead	28-Fibro	fibroblasts, cluster 28	0.027962	0.29556	0.256742	5.6337	0.942134	13.0241	0.25	0.25	RSPO2	1	eo	chr8_108279863_C_T_b38,chr8_108102236_T_C_b38,chr8_108094573_G_A_b38,chr8_108170015_T_C_b38	1
RNFL	OpticNerveHead	5-Fibro	fibroblasts, cluster 5	0.030752	0.29556	0.270083	5.33125	0.896157	12.3292	0.25	0.25	RSPO2	1	eo	chr8_108279863_C_T_b38,chr8_108102236_T_C_b38,chr8_108094573_G_A_b38,chr8_108170015_T_C_b38	1
RNFL	OpticNerveHead	10-Fibro	fibroblasts, cluster 10	0.03284	0.29556	0.276403	5.16811	0.864445	11.945	0.25	0.25	RSPO2	1	eo	chr8_108279863_C_T_b38,chr8_108102236_T_C_b38,chr8_108094573_G_A_b38,chr8_108170015_T_C_b38	1
RNFL	AnteriorSegment	Goblet	goblet cells	0.034371	0.223411	0.277718	4.84273	0.842936	10.2258	0.333333	0.333333	SLC25A16	1	e	chr10_68238298_A_C_b38,chr10_68252081_A_G_b38,chr10_68253493_C_T_b38,chr10_68254383_T_C_b38,chr10_68241124_C_T_b38,chr10_68279137_A_G_b38,chr10_68241883_T_C_b38,chr10_68280354_A_G_b38,chr10_68254881_T_C_b38,chr10_68235910_T_C_b38	1
RNFL	OpticNerveHead	22-Fibro	fibroblasts, cluster 22	0.053542	0.322158	0.326681	3.95511	0.666265	9.11848	0.25	0.25	RSPO2	1	eo	chr8_108279863_C_T_b38,chr8_108102236_T_C_b38,chr8_108094573_G_A_b38,chr8_108170015_T_C_b38	1
RNFL	OpticNerveHead	12-Astro	astrocytes, cluster 12	0.053693	0.322158	0.326681	3.95399	0.66329	9.10554	0.125	0.25	C14orf39	1	eo	chr14_60606157_T_C_b38,chr14_60490561_C_T_b38,chr14_60628456_G_C_b38,chr14_60340258_C_T_b38,chr14_60331291_T_G_b38,chr14_60555173_A_G_b38,chr14_60329930_T_C_b38,chr14_60380283_C_T_b38,chr14_60558899_A_G_b38,chr14_60341147_T_G_b38,chr14_60537171_G_C_b38,chr14_60509819_C_A_b38,chr14_60419432_T_C_b38,chr14_60624683_G_A_b38,chr14_60325385_A_G_b38,chr14_60642107_C_A_b38	1
GCC	Macula	H2	horizontal cells cluster 2	0.158207	0.294621	0.326681	3.71414	0.151831	12.8758	0	0		1			1
GCC	Retina	Cone	cone photoreceptors	0.187069	0.224833	0.326681	3.1424	0.125489	12.0074	0	0		1			1
GCC	AnteriorSegment	Pericyte1	pericytes cluster 1	0.187369	0.303742	0.326681	3.14399	0.124914	12.0535	0	0		1			1
GCC	OpticNerveHead	17-Fibro	fibroblasts, cluster 17	0.18742	0.315647	0.326681	3.14876	0.124114	11.9857	0	0		1			1
GCC	OpticNerveHead	29-Fibro	fibroblasts, cluster 29	0.187504	0.315647	0.326681	3.13634	0.125502	11.9938	0	0		1			1
GCC	Macula	RGCs	retinal ganglion cells	0.187635	0.294621	0.326681	3.08679	0.125737	10.6558	0	0		1			1
RNFL	AnteriorSegment	Pericyte1	pericytes cluster 1	0.187636	0.302756	0.326681	3.15322	0.124248	12.033	0	0		1			1
RNFL	AnteriorSegment	Lens_Fiber	lens fiber	0.187655	0.302756	0.326681	3.15342	0.124794	12.0448	0	0		1			1
GCC	AnteriorSegment	Pericyte2	pericytes cluster 2	0.188269	0.303742	0.326681	3.13693	0.123157	11.9763	0	0		1			1
RNFL	AnteriorSegment	Pericyte2	pericytes cluster 2	0.188622	0.302756	0.326681	3.13698	0.123198	11.9824	0	0		1			1
GCC	AnteriorSegment	Iris_Fibro	iris fibroblasts	0.18889	0.303742	0.326681	3.12028	0.123975	11.9233	0	0		1			1
GCC	OpticNerveHead	33-OPC	oligodendrocyte precursor cells, cluster 33	0.188923	0.315647	0.326681	3.12427	0.124679	11.9386	0	0		1			1
GCC	OpticNerveHead	31-Fibro	fibroblasts, cluster 31	0.188939	0.315647	0.326681	3.12407	0.123775	11.9341	0	0		1			1
GCC	Retina	OFFBC	ON-bipolar cells	0.190055	0.224833	0.326681	3.09696	0.123936	11.8083	0	0		1			1
GCC	OpticNerveHead	34-ACTA2	vascular smooth muscle cells (mural cells), cluster 34	0.190578	0.315647	0.326681	3.08947	0.123057	11.8302	0	0		1			1
GCC	Retina	ON_MGC	ON-midget ganglion cells	0.191376	0.224833	0.326681	3.07424	0.121567	11.7155	0.166667	0		1			1
GCC	OpticNerveHead	6-Astro	astrocytes, cluster 6	0.191813	0.315647	0.326681	3.07484	0.122717	11.7076	0	0		1			1
RNFL	AnteriorSegment	Uveal_Melanocyte	uveal melanocytes	0.192118	0.302756	0.326681	3.06707	0.121208	11.7548	0	0		1			1
GCC	OpticNerveHead	8-Astro	astrocytes, cluster 8	0.192622	0.315647	0.326681	3.05147	0.122562	11.6682	0	0		1			1
GCC	Retina	Astrocyte	astrocyte	0.194125	0.224833	0.326681	3.02899	0.120002	11.5524	0	0		1			1
GCC	Macula	H1	horizontal cells cluster 1	0.194492	0.294621	0.326681	2.97551	0.120477	10.2911	0	0		1			1
GCC	OpticNerveHead	15-Schwann	nonmyelinating Schwann cells, cluster 15	0.195134	0.315647	0.326681	3.02061	0.120071	11.5472	0	0		1			1
GCC	Retina	OFF_MGC	OFF-midget ganglion cells	0.195198	0.224833	0.326681	3.00981	0.118593	11.4794	0.166667	0		1			1
GCC	Retina	HC	horizontal cells	0.19566	0.224833	0.326681	3.01287	0.118775	11.5138	0	0		1			1
GCC	Macula	BCs	biopolar cells	0.198548	0.294621	0.326681	2.90575	0.118993	10.0807	0	0		1			1
GCC	OpticNerveHead	2-Oligo	oligodendrocytes, cluster 2	0.19992	0.315647	0.326681	2.93982	0.116862	11.2535	0	0		1			1
GCC	AnteriorSegment	Ciliary_Fibro	ciliary fibroblasts	0.200319	0.303742	0.326681	2.92523	0.115636	11.1884	0	0		1			1
GCC	Retina	Gly_AC	glycinergic amacrine cells	0.20037	0.224833	0.326681	2.91861	0.116073	11.148	0	0		1			1
GCC	OpticNerveHead	1-Astro	astrocytes, cluster 1	0.201318	0.315647	0.326681	2.91993	0.113976	11.1522	0	0		1			1
GCC	AnteriorSegment	K_Fibro	corneal fibroblasts	0.201616	0.303742	0.326681	2.90182	0.116449	11.083	0	0		1			1
RNFL	AnteriorSegment	K_Fibro	corneal fibroblasts	0.202211	0.302756	0.326681	2.89526	0.11507	11.0624	0	0		1			1
RNFL	Macula	H2	horizontal cells cluster 2	0.204924	0.372792	0.326681	2.86691	0.113386	10.9323	0	0		1			1
GCC	OpticNerveHead	28-Fibro	fibroblasts, cluster 28	0.204993	0.315647	0.326681	2.85181	0.113544	10.8816	0.166667	0		1			1
GCC	AnteriorSegment	K_Conj_Epi-Superficial	corneal conjunctival superficial epithelium	0.205229	0.303742	0.326681	2.86038	0.113038	10.9128	0	0		1			1
GCC	Retina	GABA_AC	GABAergic amacrine cells	0.205343	0.224833	0.326681	2.8512	0.113159	10.8898	0	0		1			1
GCC	OpticNerveHead	32-Fibro	fibroblasts, cluster 32	0.205434	0.315647	0.326681	2.85131	0.111898	10.8818	0	0		1			1
RNFL	AnteriorSegment	K_Conj_Epi-Superficial	corneal conjunctival superficial epithelium	0.20576	0.302756	0.326681	2.86006	0.1124	10.9263	0	0		1			1
GCC	OpticNerveHead	11-Astro	astrocytes, cluster 11	0.206531	0.315647	0.326681	2.82731	0.113391	10.7937	0	0		1			1
RNFL	AnteriorSegment	CB_PCE	ciliary body pigmented ciliary epithelium	0.207401	0.302756	0.326681	2.82053	0.112284	10.7697	0	0		1			1
GCC	OpticNerveHead	35-MyeSchwann	myelinating Schwann cells, cluster 35	0.2082	0.315647	0.326681	2.81079	0.11204	10.7251	0	0		1			1
GCC	Retina	ONBC	ON-bipolar cells	0.208821	0.224833	0.326681	2.7933	0.108782	10.6799	0	0		1			1
GCC	OpticNerveHead	0-Oligo	oligodendrocytes, cluster 0	0.209543	0.315647	0.326681	2.7864	0.110855	10.639	0	0		1			1
GCC	AnteriorSegment	TM_Fibro	trabecular meshwork fibroblasts	0.211824	0.303742	0.326681	2.75607	0.109156	10.5326	0	0		1			1
GCC	AnteriorSegment	K_Endo	corneal endothelium	0.214367	0.303742	0.326681	2.7155	0.109084	10.357	0	0		1			1
RNFL	AnteriorSegment	K_Endo	corneal endothelium	0.214775	0.302756	0.326681	2.71913	0.108008	10.3697	0	0		1			1
GCC	OpticNerveHead	5-Fibro	fibroblasts, cluster 5	0.215804	0.315647	0.326681	2.70305	0.107888	10.3413	0	0		1			1
GCC	Macula	sCones	S-cone photoreceptors	0.215826	0.294621	0.326681	2.65033	0.109195	9.18387	0	0		1			1
GCC	Retina	Rod	rod photoreceptors	0.218897	0.224833	0.326681	2.65259	0.105616	10.1141	0	0		1			1
GCC	OpticNerveHead	10-Fibro	fibroblasts, cluster 10	0.222067	0.315647	0.326681	2.62156	0.104452	10.0158	0	0		1			1
GCC	Retina	Microglia	microglia	0.223419	0.224833	0.326681	2.59424	0.102429	9.87649	0	0		1			1
GCC	OpticNerveHead	16-vEndo	vascular endothelium, cluster 16	0.223858	0.315647	0.326681	2.59962	0.102395	9.90975	0	0		1			1
GCC	OpticNerveHead	20-vEndo	vascular endothelium, cluster 20	0.224048	0.315647	0.326681	2.58705	0.102047	9.90578	0	0		1			1
GCC	Retina	MG	M√ºller Glia	0.224833	0.224833	0.326681	2.57546	0.102323	9.80452	0	0		1			1
GCC	AnteriorSegment	Mast	mast cells	0.22528	0.303742	0.326681	2.57547	0.101989	9.81078	0	0		1			1
GCC	AnteriorSegment	K_Epi-Wing2	corneal wing epithelium cluster 2	0.225397	0.303742	0.326681	2.57657	0.101841	9.79213	0	0		1			1
GCC	AnteriorSegment	Schwann	Schwann cells	0.225876	0.303742	0.326681	2.56306	0.100759	9.77295	0	0		1			1
GCC	OpticNerveHead	13-OPC	oligodendrocyte precursor cells, cluster 13	0.225892	0.315647	0.326681	2.56819	0.101679	9.80877	0	0		1			1
RNFL	AnteriorSegment	K_Epi-Wing2	corneal wing epithelium cluster 2	0.225932	0.302756	0.326681	2.57542	0.101924	9.81166	0	0		1			1
RNFL	AnteriorSegment	Mast	mast cells	0.2266	0.302756	0.326681	2.56471	0.101357	9.82626	0	0		1			1
RNFL	AnteriorSegment	Schwann	Schwann cells	0.227377	0.302756	0.326681	2.55698	0.101984	9.75677	0	0		1			1
RNFL	Retina	Both_AC	amacrine cells with both glycinergic and GABAergic markers	0.227467	0.273743	0.326681	2.56811	0.0996626	10.4134	0	0		1			1
GCC	OpticNerveHead	18-vEndo	vascular endothelium, cluster 18	0.227926	0.315647	0.326681	2.54157	0.100308	9.6819	0	0		1			1
RNFL	Retina	Cone	cone photoreceptors	0.228075	0.273743	0.326681	2.56572	0.0990353	10.4114	0	0		1			1
RNFL	OpticNerveHead	29-Fibro	fibroblasts, cluster 29	0.228838	0.362654	0.326681	2.55517	0.0995525	10.3735	0	0		1			1
GCC	AnteriorSegment	Scleral_Fibro	scleral fibroblasts	0.22924	0.303742	0.326681	2.52633	0.0999211	9.61504	0	0		1			1
RNFL	OpticNerveHead	33-OPC	oligodendrocyte precursor cells, cluster 33	0.229684	0.362654	0.326681	2.54929	0.100287	10.3327	0	0		1			1
RNFL	OpticNerveHead	31-Fibro	fibroblasts, cluster 31	0.23013	0.362654	0.326681	2.54821	0.0987132	10.3326	0	0		1			1
RNFL	AnteriorSegment	Scleral_Fibro	scleral fibroblasts	0.230363	0.302756	0.326681	2.51705	0.0988413	9.61848	0	0		1			1
GCC	OpticNerveHead	23-vEndo	vascular endothelium, cluster 23	0.231071	0.315647	0.326681	2.50363	0.0986699	9.52712	0	0		1			1
RNFL	Retina	OFFBC	ON-bipolar cells	0.231732	0.273743	0.326681	2.51881	0.0988627	10.2393	0	0		1			1
RNFL	OpticNerveHead	34-ACTA2	vascular smooth muscle cells (mural cells), cluster 34	0.232232	0.362654	0.326681	2.51633	0.0983626	10.2545	0	0		1			1
RNFL	Retina	ON_MGC	ON-midget ganglion cells	0.234079	0.273743	0.326681	2.49819	0.0968568	10.138	0.145833	0		1			1
RNFL	OpticNerveHead	6-Astro	astrocytes, cluster 6	0.234358	0.362654	0.326681	2.48711	0.0967239	10.1329	0.125	0		1			1
RNFL	OpticNerveHead	8-Astro	astrocytes, cluster 8	0.235484	0.362654	0.326681	2.4841	0.0966773	10.0777	0.125	0		1			1
RNFL	Retina	Astrocyte	astrocyte	0.236321	0.273743	0.326681	2.46903	0.0966588	10.0325	0.0833333	0		1			1
RNFL	OpticNerveHead	15-Schwann	nonmyelinating Schwann cells, cluster 15	0.236996	0.362654	0.326681	2.45759	0.0954611	10.0221	0	0		1			1
RNFL	Retina	HC	horizontal cells	0.237061	0.273743	0.326681	2.45687	0.0961124	9.96948	0	0		1			1
GCC	OpticNerveHead	27-vEndo	vascular endothelium, cluster 27	0.237339	0.315647	0.326681	2.43312	0.0961914	9.27477	0	0		1			1
RNFL	Retina	OFF_MGC	OFF-midget ganglion cells	0.237711	0.273743	0.326681	2.45216	0.0954363	9.93261	0.145833	0		1			1
GCC	AnteriorSegment	K_Epi-Basal	corneal basal epithelium	0.237805	0.303742	0.326681	2.42496	0.0955562	9.23751	0	0		1			1
RNFL	AnteriorSegment	K_Epi-Basal	corneal basal epithelium	0.238278	0.302756	0.326681	2.4215	0.0963183	9.23184	0	0		1			1
GCC	OpticNerveHead	21-vEndo	vascular endothelium, cluster 21	0.239509	0.315647	0.326681	2.40812	0.0955865	9.15873	0	0		1			1
GCC	OpticNerveHead	9-Immune	immune cells, cluster 9	0.242318	0.315647	0.326681	2.37826	0.0932153	9.06978	0	0		1			1
RNFL	OpticNerveHead	2-Oligo	oligodendrocytes, cluster 2	0.242616	0.362654	0.326681	2.3928	0.0943483	9.7324	0	0		1			1
RNFL	Macula	RGCs	retinal ganglion cells	0.242747	0.372792	0.326681	2.37486	0.0940155	9.07799	0.166667	0		1			1
RNFL	Retina	RPE	retinal pigment epithelium	0.243026	0.273743	0.326681	2.39427	0.0931695	9.72987	0	0		1			1
GCC	AnteriorSegment	Ciliary_Muscle	ciliary muscle	0.244112	0.303742	0.326681	2.35461	0.0937818	8.99519	0	0		1			1
RNFL	AnteriorSegment	Ciliary_Muscle	ciliary muscle	0.244199	0.302756	0.326681	2.35654	0.0932769	8.98678	0	0		1			1
RNFL	OpticNerveHead	1-Astro	astrocytes, cluster 1	0.24434	0.362654	0.326681	2.37919	0.0929581	9.67053	0.125	0		1			1
RNFL	Retina	Gly_AC	glycinergic amacrine cells	0.244854	0.273743	0.326681	2.3745	0.0918076	9.64096	0	0		1			1
RNFL	AnteriorSegment	Conj_Melanocyte	conjunctival melanocytes	0.245091	0.302756	0.326681	2.34111	0.0924723	8.90952	0	0		1			1
GCC	AnteriorSegment	Vasc_Endo2	vascular endothelium cluster 2	0.245702	0.303742	0.326681	2.3406	0.0925206	8.91879	0	0		1			1
RNFL	AnteriorSegment	Vasc_Endo2	vascular endothelium cluster 2	0.246312	0.302756	0.326681	2.33716	0.0924327	8.92305	0	0		1			1
RNFL	AnteriorSegment	Lens_EarlyFiber	lens early fiber	0.246396	0.302756	0.326681	2.33282	0.0923712	8.89999	0	0		1			1
RNFL	AnteriorSegment	Iris_APE	iris anterior pigmented epithelium	0.246504	0.302756	0.326681	2.32909	0.0925761	8.87448	0	0		1			1
RNFL	AnteriorSegment	Conj_Epi-Basal	conjunctival basal epithelium	0.246511	0.302756	0.326681	2.32684	0.0920649	8.86444	0	0		1			1
GCC	AnteriorSegment	Conj_Epi-Basal	conjunctival basal epithelium	0.246695	0.303742	0.326681	2.33089	0.0928203	8.88173	0	0		1			1
GCC	Macula	Rods	rod photoreceptor cells	0.248152	0.294621	0.326681	2.27631	0.0915934	7.85516	0	0		1			1
RNFL	AnteriorSegment	Iris_Sphincter	iris Sphincter muscle cells	0.248923	0.302756	0.326681	2.31121	0.091124	8.81514	0	0		1			1
RNFL	AnteriorSegment	FibroX	fibroblast X (derived from corneoscleral wedge)	0.249956	0.302756	0.326681	2.29238	0.091114	8.73937	0	0		1			1
GCC	AnteriorSegment	FibroX	fibroblast X (derived from corneoscleral wedge)	0.250083	0.303742	0.326681	2.29615	0.091078	8.75666	0	0		1			1
RNFL	Retina	GABA_AC	GABAergic amacrine cells	0.250567	0.273743	0.326681	2.31529	0.0896973	9.41115	0	0		1			1
RNFL	Macula	H1	horizontal cells cluster 1	0.250746	0.372792	0.326681	2.28686	0.0917388	8.75661	0	0		1			1
RNFL	OpticNerveHead	32-Fibro	fibroblasts, cluster 32	0.250926	0.362654	0.326681	2.31127	0.0902193	9.40328	0	0		1			1
GCC	Macula	mlCones	M-cone and L-cone photoreceptors	0.250966	0.294621	0.326681	2.24401	0.0905078	7.74285	0	0		1			1
RNFL	OpticNerveHead	11-Astro	astrocytes, cluster 11	0.2512	0.362654	0.326681	2.30708	0.0893647	9.36548	0.125	0		1			1
GCC	AnteriorSegment	Schlemm_Endo	Schlemm's canal endothelium	0.251879	0.303742	0.326681	2.27057	0.0898518	8.64279	0	0		1			1
RNFL	AnteriorSegment	Schlemm_Endo	Schlemm's canal endothelium	0.25283	0.302756	0.326681	2.26788	0.0905589	8.63954	0	0		1			1
RNFL	OpticNerveHead	3-Melanocyte	melanocytes, cluster 3	0.253187	0.362654	0.326681	2.28109	0.0882801	9.26102	0	0		1			1
GCC	Macula	ACs	amacrine cells	0.253211	0.294621	0.326681	2.22848	0.0909645	7.70031	0	0		1			1
RNFL	OpticNerveHead	35-MyeSchwann	myelinating Schwann cells, cluster 35	0.253316	0.362654	0.326681	2.28417	0.0899277	9.27297	0	0		1			1
RNFL	Retina	ONBC	ON-bipolar cells	0.253836	0.273743	0.326681	2.27509	0.0889613	9.21244	0	0		1			1
RNFL	OpticNerveHead	0-Oligo	oligodendrocytes, cluster 0	0.254027	0.362654	0.326681	2.27444	0.0890046	9.20777	0	0		1			1
RNFL	AnteriorSegment	Lymphatic_Endo	lymphatic endothelium	0.25428	0.302756	0.326681	2.25375	0.0887626	8.60082	0	0		1			1
RNFL	Macula	BCs	biopolar cells	0.254624	0.372792	0.326681	2.24531	0.0896056	8.56537	0	0		1			1
RNFL	Retina	Other_RGC	all the retinal ganglion cells (RGCs) other than the ON- and OFF-MGC	0.254728	0.273743	0.326681	2.25737	0.0877433	9.12957	0.0625	0		1			1
GCC	AnteriorSegment	Lymphatic_Endo	lymphatic endothelium	0.254828	0.303742	0.326681	2.24882	0.0890341	8.58022	0	0		1			1
GCC	OpticNerveHead	19-ACTA2	vascular smooth muscle cells (mural cells), cluster 19	0.256333	0.315647	0.326681	2.23497	0.0879637	8.51466	0	0		1			1
GCC	AnteriorSegment	Lens_GerminativeEpi	lens germinative epithelium	0.258449	0.303742	0.326681	2.20662	0.0883031	8.40823	0	0		1			1
RNFL	AnteriorSegment	Lens_GerminativeEpi	lens germinative epithelium	0.258768	0.302756	0.326681	2.2076	0.0869341	8.41262	0	0		1			1
RNFL	AnteriorSegment	K_Epi-Wing1	corneal wing epithelium cluster 1	0.25935	0.302756	0.326681	2.19961	0.0876933	8.36986	0	0		1			1
GCC	AnteriorSegment	K_Epi-Wing1	corneal wing epithelium cluster 1	0.259685	0.303742	0.326681	2.19765	0.0861424	8.39229	0	0		1			1
RNFL	AnteriorSegment	Lens_EquatorEpi	lens equator epithelium	0.259875	0.302756	0.326681	2.19704	0.086981	8.37382	0	0		1			1
GCC	AnteriorSegment	Lens_EquatorEpi	lens equator epithelium	0.26076	0.303742	0.326681	2.19397	0.0862168	8.37984	0	0		1			1
RNFL	AnteriorSegment	Lens_AnteriorEpi	lens anterior epithelium	0.263603	0.302756	0.326681	2.15773	0.0857379	8.22083	0	0		1			1
GCC	AnteriorSegment	Vasc_Endo1	vascular endothelium cluster 1	0.263892	0.303742	0.326681	2.15142	0.0853477	8.17911	0	0		1			1
GCC	AnteriorSegment	Lens_AnteriorEpi	lens anterior epithelium	0.264548	0.303742	0.326681	2.15552	0.0858002	8.21665	0	0		1			1
RNFL	OpticNerveHead	14-Melanocyte	melanocytes, cluster 14	0.265109	0.362654	0.326681	2.16648	0.0844601	8.77498	0	0		1			1
RNFL	AnteriorSegment	Vasc_Endo1	vascular endothelium cluster 1	0.265372	0.302756	0.326681	2.15047	0.0852624	8.20087	0	0		1			1
RNFL	Retina	Rod	rod photoreceptors	0.266183	0.273743	0.326681	2.15545	0.0835961	8.73986	0	0		1			1
RNFL	OpticNerveHead	16-vEndo	vascular endothelium, cluster 16	0.270951	0.362654	0.326681	2.11251	0.0825635	8.59828	0	0		1			1
RNFL	Retina	Microglia	microglia	0.271209	0.273743	0.326681	2.11473	0.0825071	8.55739	0	0		1			1
RNFL	OpticNerveHead	20-vEndo	vascular endothelium, cluster 20	0.271547	0.362654	0.326681	2.1065	0.081883	8.54704	0	0		1			1
RNFL	AnteriorSegment	K_Epi-Superficial	corneal superficial epithelium	0.271704	0.302756	0.326681	2.08953	0.0828219	7.96502	0	0		1			1
GCC	AnteriorSegment	K_Epi-Superficial	corneal superficial epithelium	0.272102	0.303742	0.326681	2.09245	0.0834169	7.97632	0	0		1			1
RNFL	Retina	MG	M√ºller Glia	0.273743	0.273743	0.326681	2.09941	0.0819194	8.4948	0	0		1			1
GCC	OpticNerveHead	26-ACTA2	pericytes (mural cells), cluster 26	0.273758	0.315647	0.326681	2.06851	0.0824006	7.86863	0	0		1			1
RNFL	OpticNerveHead	13-OPC	oligodendrocyte precursor cells, cluster 13	0.274197	0.362654	0.326681	2.08681	0.0803073	8.48747	0.125	0		1			1
RNFL	OpticNerveHead	18-vEndo	vascular endothelium, cluster 18	0.276434	0.362654	0.326681	2.06915	0.0809297	8.38386	0	0		1			1
RNFL	Macula	sCones	S-cone photoreceptors	0.276539	0.372792	0.326681	2.04157	0.0802231	7.78999	0.166667	0		1			1
RNFL	OpticNerveHead	23-vEndo	vascular endothelium, cluster 23	0.279297	0.362654	0.326681	2.04437	0.0792121	8.25537	0	0		1			1
GCC	Macula	Astrocyte	astrocyte	0.27965	0.294621	0.326681	1.98967	0.0818713	6.86019	0	0		1			1
GCC	OpticNerveHead	4-Immune	immune cells, cluster 4	0.281488	0.315647	0.326681	2.01109	0.0797973	7.65968	0	0		1			1
GCC	OpticNerveHead	22-Fibro	fibroblasts, cluster 22	0.281717	0.315647	0.326681	2.00431	0.079697	7.64131	0	0		1			1
GCC	OpticNerveHead	12-Astro	astrocytes, cluster 12	0.282245	0.315647	0.326681	2.00564	0.0788469	7.63849	0	0		1			1
GCC	AnteriorSegment	Goblet	goblet cells	0.282991	0.303742	0.326681	1.99606	0.0785193	7.62414	0	0		1			1
RNFL	OpticNerveHead	27-vEndo	vascular endothelium, cluster 27	0.286765	0.362654	0.326681	1.97873	0.0773731	8.01759	0	0		1			1
GCC	AnteriorSegment	Conj_Epi-Wing	conjunctival wing epithelium	0.289184	0.303742	0.326681	1.94418	0.0769478	7.39827	0	0		1			1
RNFL	AnteriorSegment	Conj_Epi-Wing	conjunctival wing epithelium	0.289355	0.303542	0.326681	1.94392	0.0762073	7.39753	0	0		1			1
RNFL	OpticNerveHead	21-vEndo	vascular endothelium, cluster 21	0.2902	0.362654	0.326681	1.95564	0.07632	7.93828	0	0		1			1
RNFL	OpticNerveHead	9-Immune	immune cells, cluster 9	0.292138	0.362654	0.326681	1.93412	0.0756407	7.85727	0	0		1			1
GCC	AnteriorSegment	M√∏		0.294244	0.303742	0.326681	1.90531	0.0754995	7.24606	0	0		1			1
RNFL	AnteriorSegment	M√∏		0.294301	0.303542	0.326681	1.90484	0.0756846	7.25602	0	0		1			1
GCC	Macula	Muller	M√ºller Glia	0.294621	0.294621	0.326681	1.87646	0.076303	6.46497	0	0		1			1
RNFL	AnteriorSegment	Lymphocyte	lymphocytes	0.295759	0.303542	0.326681	1.89217	0.0743165	7.19416	0	0		1			1
GCC	AnteriorSegment	Lymphocyte	lymphocytes	0.295954	0.303742	0.326681	1.89432	0.0749228	7.21788	0	0		1			1
GCC	OpticNerveHead	7-Immune	immune cells, cluster 7	0.297917	0.315647	0.327061	1.88093	0.074114	7.1672	0	0		1			1
GCC	OpticNerveHead	25-Immune	immune cells, cluster 25	0.304788	0.315647	0.332796	1.83446	0.0718988	6.9761	0	0		1			1
GCC	OpticNerveHead	30-Immune	immune cells, cluster 30	0.306879	0.315647	0.333277	1.81878	0.0720473	6.9159	0.166667	0		1			1
RNFL	OpticNerveHead	19-ACTA2	vascular smooth muscle cells (mural cells), cluster 19	0.309148	0.370978	0.333946	1.81379	0.0713701	7.36704	0	0		1			1
RNFL	Macula	Rods	rod photoreceptor cells	0.31671	0.372792	0.337722	1.755	0.0698699	6.68572	0	0		1			1
RNFL	AnteriorSegment	Conj_Epi-Superficial	conjunctival superficial epithelium	0.317326	0.317326	0.337722	1.74879	0.0690727	6.65092	0	0		1			1
GCC	AnteriorSegment	Conj_Epi-Superficial	conjunctival superficial epithelium	0.317659	0.317659	0.337722	1.74794	0.0694319	6.65848	0	0		1			1
RNFL	Macula	mlCones	M-cone and L-cone photoreceptors	0.320067	0.372792	0.338248	1.73119	0.0689231	6.60491	0	0		1			1
RNFL	Macula	ACs	amacrine cells	0.321503	0.372792	0.338248	1.72196	0.0683575	6.55101	0	0		1			1
GCC	OpticNerveHead	24-Immune	immune cells, cluster 24	0.329794	0.329794	0.343804	1.66906	0.0660083	6.34566	0.166667	0		1			1
RNFL	OpticNerveHead	26-ACTA2	pericytes (mural cells), cluster 26	0.330188	0.378477	0.343804	1.68418	0.065499	6.82549	0	0		1			1
RNFL	OpticNerveHead	4-Immune	immune cells, cluster 4	0.337444	0.378477	0.349557	1.63902	0.0641255	6.63671	0	0		1			1
RNFL	Macula	Astrocyte	astrocyte	0.354183	0.372792	0.365025	1.53663	0.0605836	5.84527	0.166667	0		1			1
RNFL	OpticNerveHead	7-Immune	immune cells, cluster 7	0.356092	0.378477	0.36513	1.5345	0.0597099	6.21112	0	0		1			1
RNFL	Macula	RPE	retinal pigment epithelium	0.359915	0.372792	0.367186	1.50805	0.0598219	5.74105	0	0		1			1
RNFL	OpticNerveHead	25-Immune	immune cells, cluster 25	0.364545	0.378477	0.370041	1.49325	0.0577905	6.04063	0	0		1			1
RNFL	OpticNerveHead	30-Immune	immune cells, cluster 30	0.367964	0.378477	0.371644	1.47722	0.0579076	5.99754	0	0		1			1
RNFL	Macula	Muller	M√ºller Glia	0.372792	0.372792	0.374647	1.44489	0.0574982	5.50481	0	0		1			1
RNFL	OpticNerveHead	24-Immune	immune cells, cluster 24	0.393558	0.393558	0.393558	1.36143	0.0527729	5.49826	0	0		1			1
