# Supplementary material for: Deep-learning-derived glaucoma-related endophenotypes enable novel genome-wide genetic and functional discovery
Source: Research Square preprint supplement (doi:10.21203/rs.3.rs-8311177/v1), 2026-01-22
Supplement: Supplementary file 10 [file SI_File_9.xlsx]

## Sheet: SI_Table_21
Gene	Population	Exposure	Outcome	bxy	se	p	nsnp
SLC25A12	EUR	Artery_Tibial	auto_GCC_q0_EUR	-0.0899728	0.0354846	0.0112271	1
SLC25A12	EUR	Artery_Tibial	auto_GCC_q10_EUR	0.0657011	0.0349503	0.0601294	1
SLC25A12	EUR	Artery_Tibial	auto_GCC_q2_EUR	0.102527	0.0362232	0.00464851	1
SLC25A12	EUR	Artery_Tibial	auto_GCC_q3_EUR	-0.0966685	0.0360624	0.00734921	1
SLC25A12	EUR	Artery_Tibial	auto_GCC_q4_EUR	0.157348	0.0377505	3.07152e-05	1
SLC25A12	EUR	Artery_Tibial	auto_GCC_q6_EUR	-0.0602609	0.0356769	0.0912054	1
SLC25A12	EUR	Artery_Tibial	auto_GCC_q8_EUR	0.149397	0.0378115	7.77942e-05	1
SLC25A12	EUR	Artery_Tibial	auto_RNFL_q0_EUR	0.0251087	0.0348383	0.471081	1
SLC25A12	EUR	Artery_Tibial	auto_RNFL_q1_EUR	-0.132239	0.0371697	0.000374092	1
SLC25A12	EUR	Artery_Tibial	auto_RNFL_q3_EUR	0.144375	0.0372306	0.000105381	1
SLC25A12	EUR	Artery_Tibial	auto_RNFL_q4_EUR	-0.0929022	0.0359636	0.00978815	1
SLC25A12	EUR	Artery_Tibial	auto_RNFL_q6_EUR	-0.116755	0.0366495	0.0014439	1
SLC25A12	EUR	Artery_Tibial	auto_RNFL_q7_EUR	0.0887174	0.0358583	0.0133567	1
SLC25A12	EUR	Artery_Tibial	auto_RNFL_q8_EUR	0.123033	0.0368535	0.000842543	1
SLC25A12	EUR	Artery_Tibial	moco_GCC_q3_EUR	0.139353	0.0374276	0.000196655	1
SLC25A12	EUR	Artery_Tibial	moco_GCC_q8_EUR	-0.0368261	0.0349419	0.291918	1
SLC25A12	EUR	Artery_Tibial	moco_RNFL_q1_EUR	-0.128891	0.0370524	0.000503991	1
SLC25A12	EUR	Artery_Tibial	moco_RNFL_q3_EUR	0.0878804	0.0358377	0.0141995	1
SLC25A12	EUR	Artery_Tibial	moco_RNFL_q5_EUR	0.141446	0.0375057	0.000162392	1
SLC25A12	EUR	Artery_Tibial	moco_RNFL_q7_EUR	-0.134332	0.0372443	0.000310036	1
SLC25A12	EUR	Artery_Tibial	moco_RNFL_q9_EUR	-0.0728152	0.0354998	0.0402526	1
SLC25A12	EUR	Brain_Caudate_basal_ganglia	auto_GCC_q0_EUR	-0.104538	0.0471615	0.026651	1
SLC25A12	EUR	Brain_Caudate_basal_ganglia	auto_GCC_q10_EUR	0.0956963	0.046618	0.0400944	1
SLC25A12	EUR	Brain_Caudate_basal_ganglia	auto_GCC_q2_EUR	0.130542	0.0489918	0.00770868	1
SLC25A12	EUR	Brain_Caudate_basal_ganglia	auto_GCC_q3_EUR	-0.12014	0.0486913	0.0136102	1
SLC25A12	EUR	Brain_Caudate_basal_ganglia	auto_GCC_q4_EUR	0.208035	0.0561744	0.000212743	1
SLC25A12	EUR	Brain_Caudate_basal_ganglia	auto_GCC_q6_EUR	-0.0634508	0.0455106	0.163257	1
SLC25A12	EUR	Brain_Caudate_basal_ganglia	auto_GCC_q8_EUR	0.192433	0.0549672	0.000463748	1
SLC25A12	EUR	Brain_Caudate_basal_ganglia	auto_RNFL_q0_EUR	0.0265245	0.04393	0.545983	1
SLC25A12	EUR	Brain_Caudate_basal_ganglia	auto_RNFL_q1_EUR	-0.164348	0.0518382	0.00152229	1
SLC25A12	EUR	Brain_Caudate_basal_ganglia	auto_RNFL_q3_EUR	0.188792	0.0541823	0.000493264	1
SLC25A12	EUR	Brain_Caudate_basal_ganglia	auto_RNFL_q4_EUR	-0.122741	0.0484078	0.0112268	1
SLC25A12	EUR	Brain_Caudate_basal_ganglia	auto_RNFL_q6_EUR	-0.147185	0.0503316	0.00345225	1
SLC25A12	EUR	Brain_Caudate_basal_ganglia	auto_RNFL_q7_EUR	0.107138	0.0478097	0.0250306	1
SLC25A12	EUR	Brain_Caudate_basal_ganglia	auto_RNFL_q8_EUR	0.150826	0.0506409	0.0028982	1
SLC25A12	EUR	Brain_Caudate_basal_ganglia	moco_GCC_q3_EUR	0.164868	0.0518858	0.00148541	1
SLC25A12	EUR	Brain_Caudate_basal_ganglia	moco_GCC_q8_EUR	-0.0442075	0.0448505	0.324298	1
SLC25A12	EUR	Brain_Caudate_basal_ganglia	moco_RNFL_q1_EUR	-0.169029	0.0522698	0.00122165	1
SLC25A12	EUR	Brain_Caudate_basal_ganglia	moco_RNFL_q3_EUR	0.120661	0.0487283	0.0132793	1
SLC25A12	EUR	Brain_Caudate_basal_ganglia	moco_RNFL_q5_EUR	0.195033	0.0552304	0.000413578	1
SLC25A12	EUR	Brain_Caudate_basal_ganglia	moco_RNFL_q7_EUR	-0.169549	0.0527533	0.00130902	1
SLC25A12	EUR	Brain_Caudate_basal_ganglia	moco_RNFL_q9_EUR	-0.0910155	0.0463474	0.049557	1
SLC25A12	EUR	Brain_Cerebellar_Hemisphere	auto_GCC_q0_EUR	-0.0574655	0.0247713	0.0203495	1
SLC25A12	EUR	Brain_Cerebellar_Hemisphere	auto_GCC_q10_EUR	0.047497	0.0245489	0.0530163	1
SLC25A12	EUR	Brain_Cerebellar_Hemisphere	auto_GCC_q2_EUR	0.0724183	0.025459	0.004448	1
SLC25A12	EUR	Brain_Cerebellar_Hemisphere	auto_GCC_q3_EUR	-0.0633294	0.0252037	0.0119811	1
SLC25A12	EUR	Brain_Cerebellar_Hemisphere	auto_GCC_q4_EUR	0.107308	0.026452	4.97674e-05	1
SLC25A12	EUR	Brain_Cerebellar_Hemisphere	auto_GCC_q6_EUR	-0.0401672	0.0249891	0.107969	1
SLC25A12	EUR	Brain_Cerebellar_Hemisphere	auto_GCC_q8_EUR	0.100271	0.0264306	0.000148383	1
SLC25A12	EUR	Brain_Cerebellar_Hemisphere	auto_RNFL_q0_EUR	0.0205234	0.0244459	0.401164	1
SLC25A12	EUR	Brain_Cerebellar_Hemisphere	auto_RNFL_q1_EUR	-0.0920621	0.0258427	0.000367472	1
SLC25A12	EUR	Brain_Cerebellar_Hemisphere	auto_RNFL_q3_EUR	0.0955804	0.0259762	0.00023366	1
SLC25A12	EUR	Brain_Cerebellar_Hemisphere	auto_RNFL_q4_EUR	-0.062743	0.0249052	0.0117597	1
SLC25A12	EUR	Brain_Cerebellar_Hemisphere	auto_RNFL_q6_EUR	-0.0741775	0.0252325	0.00328469	1
SLC25A12	EUR	Brain_Cerebellar_Hemisphere	auto_RNFL_q7_EUR	0.0630362	0.025196	0.0123552	1
SLC25A12	EUR	Brain_Cerebellar_Hemisphere	auto_RNFL_q8_EUR	0.0838528	0.0255481	0.00103019	1
SLC25A12	EUR	Brain_Cerebellar_Hemisphere	moco_GCC_q3_EUR	0.0926485	0.0258646	0.000340905	1
SLC25A12	EUR	Brain_Cerebellar_Hemisphere	moco_GCC_q8_EUR	-0.0272668	0.0245149	0.266029	1
SLC25A12	EUR	Brain_Cerebellar_Hemisphere	moco_RNFL_q1_EUR	-0.0864915	0.0256402	0.000742781	1
SLC25A12	EUR	Brain_Cerebellar_Hemisphere	moco_RNFL_q3_EUR	0.0603975	0.0251282	0.0162356	1
SLC25A12	EUR	Brain_Cerebellar_Hemisphere	moco_RNFL_q5_EUR	0.094994	0.0262255	0.000292106	1
SLC25A12	EUR	Brain_Cerebellar_Hemisphere	moco_RNFL_q7_EUR	-0.0952872	0.0262366	0.00028141	1
SLC25A12	EUR	Brain_Cerebellar_Hemisphere	moco_RNFL_q9_EUR	-0.0466174	0.0245313	0.0573901	1
SLC25A12	EUR	Brain_Cerebellum	auto_GCC_q0_EUR	-0.0589036	0.0239603	0.0139565	1
SLC25A12	EUR	Brain_Cerebellum	auto_GCC_q10_EUR	0.0450937	0.023621	0.056256	1
SLC25A12	EUR	Brain_Cerebellum	auto_GCC_q2_EUR	0.0696133	0.0245494	0.00457343	1
SLC25A12	EUR	Brain_Cerebellum	auto_GCC_q3_EUR	-0.0622856	0.0243272	0.0104572	1
SLC25A12	EUR	Brain_Cerebellum	auto_GCC_q4_EUR	0.104843	0.0256643	4.40463e-05	1
SLC25A12	EUR	Brain_Cerebellum	auto_GCC_q6_EUR	-0.0425571	0.0241211	0.0776789	1
SLC25A12	EUR	Brain_Cerebellum	auto_GCC_q8_EUR	0.0992061	0.0256677	0.000111085	1
SLC25A12	EUR	Brain_Cerebellum	auto_RNFL_q0_EUR	0.0208558	0.0235179	0.375183	1
SLC25A12	EUR	Brain_Cerebellum	auto_RNFL_q1_EUR	-0.0921602	0.0253708	0.000280654	1
SLC25A12	EUR	Brain_Cerebellum	auto_RNFL_q3_EUR	0.0977969	0.0253497	0.000114359	1
SLC25A12	EUR	Brain_Cerebellum	auto_RNFL_q4_EUR	-0.0656677	0.0244269	0.00718105	1
SLC25A12	EUR	Brain_Cerebellum	auto_RNFL_q6_EUR	-0.0797594	0.024894	0.00135551	1
SLC25A12	EUR	Brain_Cerebellum	auto_RNFL_q7_EUR	0.0574944	0.0241942	0.0174839	1
SLC25A12	EUR	Brain_Cerebellum	auto_RNFL_q8_EUR	0.0786321	0.0248537	0.00155722	1
SLC25A12	EUR	Brain_Cerebellum	moco_GCC_q3_EUR	0.0938512	0.0254404	0.000225079	1
SLC25A12	EUR	Brain_Cerebellum	moco_GCC_q8_EUR	-0.0245197	0.0235576	0.29795	1
SLC25A12	EUR	Brain_Cerebellum	moco_RNFL_q1_EUR	-0.0887782	0.0249738	0.000378196	1
SLC25A12	EUR	Brain_Cerebellum	moco_RNFL_q3_EUR	0.0580581	0.0242093	0.0164772	1
SLC25A12	EUR	Brain_Cerebellum	moco_RNFL_q5_EUR	0.0952604	0.0254992	0.000187104	1
SLC25A12	EUR	Brain_Cerebellum	moco_RNFL_q7_EUR	-0.0935694	0.0254287	0.000233531	1
SLC25A12	EUR	Brain_Cerebellum	moco_RNFL_q9_EUR	-0.0504485	0.0237425	0.0336013	1
SLC25A12	EUR	Brain_Cortex	auto_GCC_q0_EUR	-0.0745333	0.0341121	0.0288924	1
SLC25A12	EUR	Brain_Cortex	auto_GCC_q10_EUR	0.0654631	0.033718	0.0521993	1
SLC25A12	EUR	Brain_Cortex	auto_GCC_q2_EUR	0.0974059	0.0356663	0.00631352	1
SLC25A12	EUR	Brain_Cortex	auto_GCC_q3_EUR	-0.0796599	0.0347266	0.0217953	1
SLC25A12	EUR	Brain_Cortex	auto_GCC_q4_EUR	0.139208	0.0381397	0.000262296	1
SLC25A12	EUR	Brain_Cortex	auto_GCC_q6_EUR	-0.0571816	0.0341637	0.0941787	1
SLC25A12	EUR	Brain_Cortex	auto_GCC_q8_EUR	0.128954	0.0377149	0.000628079	1
SLC25A12	EUR	Brain_Cortex	auto_RNFL_q0_EUR	0.0272106	0.0329839	0.409392	1
SLC25A12	EUR	Brain_Cortex	auto_RNFL_q1_EUR	-0.126588	0.0375458	0.000747406	1
SLC25A12	EUR	Brain_Cortex	auto_RNFL_q3_EUR	0.136053	0.0378992	0.000330861	1
SLC25A12	EUR	Brain_Cortex	auto_RNFL_q4_EUR	-0.087547	0.035124	0.0126844	1
SLC25A12	EUR	Brain_Cortex	auto_RNFL_q6_EUR	-0.109237	0.0363806	0.00267677	1
SLC25A12	EUR	Brain_Cortex	auto_RNFL_q7_EUR	0.0851809	0.0350013	0.0149476	1
SLC25A12	EUR	Brain_Cortex	auto_RNFL_q8_EUR	0.112391	0.0365823	0.00212423	1
SLC25A12	EUR	Brain_Cortex	moco_GCC_q3_EUR	0.12856	0.0376865	0.000646543	1
SLC25A12	EUR	Brain_Cortex	moco_GCC_q8_EUR	-0.0268162	0.0329771	0.416117	1
SLC25A12	EUR	Brain_Cortex	moco_RNFL_q1_EUR	-0.11949	0.0370529	0.00126039	1
SLC25A12	EUR	Brain_Cortex	moco_RNFL_q3_EUR	0.0847865	0.0349812	0.0153601	1
SLC25A12	EUR	Brain_Cortex	moco_RNFL_q5_EUR	0.132109	0.0379441	0.000498269	1
SLC25A12	EUR	Brain_Cortex	moco_RNFL_q7_EUR	-0.121856	0.0372147	0.00105886	1
SLC25A12	EUR	Brain_Cortex	moco_RNFL_q9_EUR	-0.0694067	0.0342602	0.0427783	1
SLC25A12	EUR	Brain_Nucleus_accumbens_basal_ganglia	auto_GCC_q0_EUR	-0.0969029	0.0425074	0.0226271	1
SLC25A12	EUR	Brain_Nucleus_accumbens_basal_ganglia	auto_GCC_q10_EUR	0.0792408	0.041427	0.0557761	1
SLC25A12	EUR	Brain_Nucleus_accumbens_basal_ganglia	auto_GCC_q2_EUR	0.121248	0.0447133	0.00669434	1
SLC25A12	EUR	Brain_Nucleus_accumbens_basal_ganglia	auto_GCC_q3_EUR	-0.104063	0.0434329	0.0165772	1
SLC25A12	EUR	Brain_Nucleus_accumbens_basal_ganglia	auto_GCC_q4_EUR	0.177098	0.0494708	0.000343776	1
SLC25A12	EUR	Brain_Nucleus_accumbens_basal_ganglia	auto_GCC_q6_EUR	-0.0744673	0.0420769	0.076762	1
SLC25A12	EUR	Brain_Nucleus_accumbens_basal_ganglia	auto_GCC_q8_EUR	0.168029	0.0489256	0.00059393	1
SLC25A12	EUR	Brain_Nucleus_accumbens_basal_ganglia	auto_RNFL_q0_EUR	0.0324601	0.0400186	0.417294	1
SLC25A12	EUR	Brain_Nucleus_accumbens_basal_ganglia	auto_RNFL_q1_EUR	-0.154663	0.0476235	0.00116377	1
SLC25A12	EUR	Brain_Nucleus_accumbens_basal_ganglia	auto_RNFL_q3_EUR	0.16421	0.0481574	0.00064997	1
SLC25A12	EUR	Brain_Nucleus_accumbens_basal_ganglia	auto_RNFL_q4_EUR	-0.109314	0.0438073	0.0125836	1
SLC25A12	EUR	Brain_Nucleus_accumbens_basal_ganglia	auto_RNFL_q6_EUR	-0.136046	0.0459375	0.00306099	1
SLC25A12	EUR	Brain_Nucleus_accumbens_basal_ganglia	auto_RNFL_q7_EUR	0.0964256	0.042916	0.0246501	1
SLC25A12	EUR	Brain_Nucleus_accumbens_basal_ganglia	auto_RNFL_q8_EUR	0.134614	0.0458144	0.00330073	1
SLC25A12	EUR	Brain_Nucleus_accumbens_basal_ganglia	moco_GCC_q3_EUR	0.157527	0.0478964	0.00100576	1
SLC25A12	EUR	Brain_Nucleus_accumbens_basal_ganglia	moco_GCC_q8_EUR	-0.0410525	0.040248	0.307734	1
SLC25A12	EUR	Brain_Nucleus_accumbens_basal_ganglia	moco_RNFL_q1_EUR	-0.150367	0.0472208	0.0014509	1
SLC25A12	EUR	Brain_Nucleus_accumbens_basal_ganglia	moco_RNFL_q3_EUR	0.0945162	0.0427921	0.0271933	1
SLC25A12	EUR	Brain_Nucleus_accumbens_basal_ganglia	moco_RNFL_q5_EUR	0.161823	0.048312	0.000809458	1
SLC25A12	EUR	Brain_Nucleus_accumbens_basal_ganglia	moco_RNFL_q7_EUR	-0.158004	0.0479422	0.000981679	1
SLC25A12	EUR	Brain_Nucleus_accumbens_basal_ganglia	moco_RNFL_q9_EUR	-0.0854464	0.0422325	0.0430486	1
SLC25A12	EUR	Nerve_Tibial	auto_GCC_q0_EUR	0.0060567	0.0330383	0.854544	1
SLC25A12	EUR	Nerve_Tibial	auto_GCC_q10_EUR	0.00211984	0.0327232	0.948348	1
SLC25A12	EUR	Nerve_Tibial	auto_GCC_q2_EUR	-0.0202899	0.0334841	0.544543	1
SLC25A12	EUR	Nerve_Tibial	auto_GCC_q3_EUR	-0.0130219	0.0333917	0.696556	1
SLC25A12	EUR	Nerve_Tibial	auto_GCC_q4_EUR	0.00484536	0.0330332	0.883384	1
SLC25A12	EUR	Nerve_Tibial	auto_GCC_q6_EUR	-0.00211984	0.0336312	0.949741	1
SLC25A12	EUR	Nerve_Tibial	auto_GCC_q8_EUR	0.00060567	0.033327	0.9855	1
SLC25A12	EUR	Nerve_Tibial	auto_RNFL_q0_EUR	0.0735889	0.0350546	0.0357935	1
SLC25A12	EUR	Nerve_Tibial	auto_RNFL_q1_EUR	-0.0675322	0.034742	0.0519172	1
SLC25A12	EUR	Nerve_Tibial	auto_RNFL_q3_EUR	-0.00545103	0.032733	0.86774	1
SLC25A12	EUR	Nerve_Tibial	auto_RNFL_q4_EUR	-0.0517848	0.0340447	0.12824	1
SLC25A12	EUR	Nerve_Tibial	auto_RNFL_q6_EUR	-0.0230154	0.0332282	0.488531	1
SLC25A12	EUR	Nerve_Tibial	auto_RNFL_q7_EUR	-0.0115077	0.0333775	0.730264	1
SLC25A12	EUR	Nerve_Tibial	auto_RNFL_q8_EUR	-0.0342203	0.0334736	0.306636	1
SLC25A12	EUR	Nerve_Tibial	moco_GCC_q3_EUR	-0.0299806	0.0333697	0.368951	1
SLC25A12	EUR	Nerve_Tibial	moco_GCC_q8_EUR	0.029375	0.0336557	0.382767	1
SLC25A12	EUR	Nerve_Tibial	moco_RNFL_q1_EUR	-0.0442139	0.0337712	0.19046	1
SLC25A12	EUR	Nerve_Tibial	moco_RNFL_q3_EUR	0.00484536	0.0333358	0.884435	1
SLC25A12	EUR	Nerve_Tibial	moco_RNFL_q5_EUR	0.0405799	0.0339516	0.231998	1
SLC25A12	EUR	Nerve_Tibial	moco_RNFL_q7_EUR	-0.0578415	0.0345844	0.0944307	1
SLC25A12	EUR	Nerve_Tibial	moco_RNFL_q9_EUR	-0.0502706	0.0339868	0.139108	1
NPLOC4	Cross-ancestry	Artery_Aorta	auto_GCC_q0_all	0.140603	0.0307473	4.8112e-06	1
NPLOC4	Cross-ancestry	Artery_Aorta	auto_GCC_q10_all	0.0442749	0.0254372	0.0817611	1
NPLOC4	Cross-ancestry	Artery_Aorta	auto_GCC_q2_all	0.0266248	0.0253603	0.293782	1
NPLOC4	Cross-ancestry	Artery_Aorta	auto_GCC_q3_all	0.145389	0.0310808	2.89988e-06	1
NPLOC4	Cross-ancestry	Artery_Aorta	auto_GCC_q4_all	-0.108294	0.0287099	0.000161934	1
NPLOC4	Cross-ancestry	Artery_Aorta	auto_GCC_q6_all	-0.0568394	0.0263867	0.031233	1
NPLOC4	Cross-ancestry	Artery_Aorta	auto_GCC_q8_all	-0.129534	0.0300059	1.58193e-05	1
NPLOC4	Cross-ancestry	Artery_Aorta	auto_RNFL_q0_all	0.0305138	0.0254262	0.230104	1
NPLOC4	Cross-ancestry	Artery_Aorta	auto_RNFL_q1_all	-0.0119662	0.0251917	0.634784	1
NPLOC4	Cross-ancestry	Artery_Aorta	auto_RNFL_q3_all	-0.0293172	0.025701	0.253993	1
NPLOC4	Cross-ancestry	Artery_Aorta	auto_RNFL_q4_all	0.0317104	0.0254483	0.212737	1
NPLOC4	Cross-ancestry	Artery_Aorta	auto_RNFL_q6_all	0.0694039	0.0268357	0.00970247	1
NPLOC4	Cross-ancestry	Artery_Aorta	auto_RNFL_q7_all	0.0457707	0.0260605	0.0790331	1
NPLOC4	Cross-ancestry	Artery_Aorta	auto_RNFL_q8_all	-0.0394884	0.0259052	0.127423	1
NPLOC4	Cross-ancestry	Artery_Aorta	moco_GCC_q3_all	-0.0795752	0.0272577	0.00350739	1
NPLOC4	Cross-ancestry	Artery_Aorta	moco_GCC_q8_all	-0.0367961	0.0261398	0.159231	1
NPLOC4	Cross-ancestry	Artery_Aorta	moco_RNFL_q1_all	0.0287189	0.0256908	0.263624	1
NPLOC4	Cross-ancestry	Artery_Aorta	moco_RNFL_q3_all	-0.0353003	0.025814	0.171473	1
NPLOC4	Cross-ancestry	Artery_Aorta	moco_RNFL_q5_all	-0.0406851	0.0259331	0.116684	1
NPLOC4	Cross-ancestry	Artery_Aorta	moco_RNFL_q7_all	-0.00448732	0.0254538	0.860064	1
NPLOC4	Cross-ancestry	Artery_Aorta	moco_RNFL_q9_all	0.0577369	0.0264161	0.0288395	1
NPLOC4	Cross-ancestry	Artery_Tibial	auto_GCC_q0_all	0.197842	0.0409354	1.34482e-06	1
NPLOC4	Cross-ancestry	Artery_Tibial	auto_GCC_q10_all	0.0574112	0.0352064	0.102953	1
NPLOC4	Cross-ancestry	Artery_Tibial	auto_GCC_q2_all	0.0441942	0.035414	0.212056	1
NPLOC4	Cross-ancestry	Artery_Tibial	auto_GCC_q3_all	0.212711	0.0417148	3.4115e-07	1
NPLOC4	Cross-ancestry	Artery_Tibial	auto_GCC_q4_all	-0.161082	0.0391982	3.96648e-05	1
NPLOC4	Cross-ancestry	Artery_Tibial	auto_GCC_q6_all	-0.0888015	0.0366868	0.0154978	1
NPLOC4	Cross-ancestry	Artery_Tibial	auto_GCC_q8_all	-0.187929	0.0404396	3.36556e-06	1
NPLOC4	Cross-ancestry	Artery_Tibial	auto_RNFL_q0_all	0.0297382	0.0352544	0.398932	1
NPLOC4	Cross-ancestry	Artery_Tibial	auto_RNFL_q1_all	-0.00206515	0.0351225	0.953113	1
NPLOC4	Cross-ancestry	Artery_Tibial	auto_RNFL_q3_all	-0.04089	0.0357821	0.253142	1
NPLOC4	Cross-ancestry	Artery_Tibial	auto_RNFL_q4_all	0.0603024	0.0356639	0.0908645	1
NPLOC4	Cross-ancestry	Artery_Tibial	auto_RNFL_q6_all	0.10491	0.0371328	0.00472425	1
NPLOC4	Cross-ancestry	Artery_Tibial	auto_RNFL_q7_all	0.0660848	0.0361773	0.0677455	1
NPLOC4	Cross-ancestry	Artery_Tibial	auto_RNFL_q8_all	-0.0598894	0.0360633	0.0967785	1
NPLOC4	Cross-ancestry	Artery_Tibial	moco_GCC_q3_all	-0.103671	0.037096	0.00519552	1
NPLOC4	Cross-ancestry	Artery_Tibial	moco_GCC_q8_all	-0.0499767	0.0363123	0.168728	1
NPLOC4	Cross-ancestry	Artery_Tibial	moco_RNFL_q1_all	0.0479115	0.0358739	0.181695	1
NPLOC4	Cross-ancestry	Artery_Tibial	moco_RNFL_q3_all	-0.0503897	0.0363183	0.165305	1
NPLOC4	Cross-ancestry	Artery_Tibial	moco_RNFL_q5_all	-0.0648458	0.0361536	0.072874	1
NPLOC4	Cross-ancestry	Artery_Tibial	moco_RNFL_q7_all	0.00454333	0.0355377	0.898271	1
NPLOC4	Cross-ancestry	Artery_Tibial	moco_RNFL_q9_all	0.0838451	0.0365635	0.0218401	1
NPLOC4	Cross-ancestry	Brain_Cerebellar_Hemisphere	auto_GCC_q0_all	0.0923765	0.0217064	2.08369e-05	1
NPLOC4	Cross-ancestry	Brain_Cerebellar_Hemisphere	auto_GCC_q10_all	0.0366126	0.0171368	0.0326397	1
NPLOC4	Cross-ancestry	Brain_Cerebellar_Hemisphere	auto_GCC_q2_all	0.0302289	0.0168376	0.0726019	1
NPLOC4	Cross-ancestry	Brain_Cerebellar_Hemisphere	auto_GCC_q3_all	0.0953806	0.0220138	1.47249e-05	1
NPLOC4	Cross-ancestry	Brain_Cerebellar_Hemisphere	auto_GCC_q4_all	-0.0660905	0.019285	0.000610183	1
NPLOC4	Cross-ancestry	Brain_Cerebellar_Hemisphere	auto_GCC_q6_all	-0.0461882	0.0180231	0.0103854	1
NPLOC4	Cross-ancestry	Brain_Cerebellar_Hemisphere	auto_GCC_q8_all	-0.0809233	0.0205881	8.47412e-05	1
NPLOC4	Cross-ancestry	Brain_Cerebellar_Hemisphere	auto_RNFL_q0_all	0.0223431	0.0167249	0.181577	1
NPLOC4	Cross-ancestry	Brain_Cerebellar_Hemisphere	auto_RNFL_q1_all	-0.00995113	0.0162508	0.540309	1
NPLOC4	Cross-ancestry	Brain_Cerebellar_Hemisphere	auto_RNFL_q3_all	-0.0189635	0.0166252	0.254017	1
NPLOC4	Cross-ancestry	Brain_Cerebellar_Hemisphere	auto_RNFL_q4_all	0.0199023	0.0164672	0.226816	1
NPLOC4	Cross-ancestry	Brain_Cerebellar_Hemisphere	auto_RNFL_q6_all	0.0435596	0.017693	0.0138174	1
NPLOC4	Cross-ancestry	Brain_Cerebellar_Hemisphere	auto_RNFL_q7_all	0.0298534	0.0171824	0.0823091	1
NPLOC4	Cross-ancestry	Brain_Cerebellar_Hemisphere	auto_RNFL_q8_all	-0.0257227	0.0168403	0.126648	1
NPLOC4	Cross-ancestry	Brain_Cerebellar_Hemisphere	moco_GCC_q3_all	-0.0454372	0.0178051	0.0107132	1
NPLOC4	Cross-ancestry	Brain_Cerebellar_Hemisphere	moco_GCC_q8_all	-0.0214043	0.0168794	0.204772	1
NPLOC4	Cross-ancestry	Brain_Cerebellar_Hemisphere	moco_RNFL_q1_all	0.0191512	0.0166303	0.249492	1
NPLOC4	Cross-ancestry	Brain_Cerebellar_Hemisphere	moco_RNFL_q3_all	-0.0225309	0.0169143	0.182841	1
NPLOC4	Cross-ancestry	Brain_Cerebellar_Hemisphere	moco_RNFL_q5_all	-0.0285391	0.016948	0.0921977	1
NPLOC4	Cross-ancestry	Brain_Cerebellar_Hemisphere	moco_RNFL_q7_all	-0.00150206	0.0165545	0.927704	1
NPLOC4	Cross-ancestry	Brain_Cerebellar_Hemisphere	moco_RNFL_q9_all	0.0336085	0.0171681	0.050275	1
NPLOC4	Cross-ancestry	Brain_Cerebellum	auto_GCC_q0_all	0.0847057	0.0186036	5.28406e-06	1
NPLOC4	Cross-ancestry	Brain_Cerebellum	auto_GCC_q10_all	0.0245806	0.0152065	0.105997	1
NPLOC4	Cross-ancestry	Brain_Cerebellum	auto_GCC_q2_all	0.0189217	0.0152518	0.214746	1
NPLOC4	Cross-ancestry	Brain_Cerebellum	auto_GCC_q3_all	0.0910719	0.0190747	1.8017e-06	1
NPLOC4	Cross-ancestry	Brain_Cerebellum	auto_GCC_q4_all	-0.0689671	0.0175423	8.44268e-05	1
NPLOC4	Cross-ancestry	Brain_Cerebellum	auto_GCC_q6_all	-0.0380203	0.0159755	0.0173165	1
NPLOC4	Cross-ancestry	Brain_Cerebellum	auto_GCC_q8_all	-0.0804616	0.0183024	1.10141e-05	1
NPLOC4	Cross-ancestry	Brain_Cerebellum	auto_RNFL_q0_all	0.0127324	0.0151496	0.40066	1
NPLOC4	Cross-ancestry	Brain_Cerebellum	auto_RNFL_q1_all	-0.000884194	0.0150649	0.953197	1
NPLOC4	Cross-ancestry	Brain_Cerebellum	auto_RNFL_q3_all	-0.017507	0.0153996	0.255602	1
NPLOC4	Cross-ancestry	Brain_Cerebellum	auto_RNFL_q4_all	0.0258185	0.0154115	0.0938799	1
NPLOC4	Cross-ancestry	Brain_Cerebellum	auto_RNFL_q6_all	0.044917	0.016257	0.00572829	1
NPLOC4	Cross-ancestry	Brain_Cerebellum	auto_RNFL_q7_all	0.0282942	0.015652	0.0706526	1
NPLOC4	Cross-ancestry	Brain_Cerebellum	auto_RNFL_q8_all	-0.0256416	0.0155793	0.0997901	1
NPLOC4	Cross-ancestry	Brain_Cerebellum	moco_GCC_q3_all	-0.0443865	0.0162338	0.00625322	1
NPLOC4	Cross-ancestry	Brain_Cerebellum	moco_GCC_q8_all	-0.0213975	0.0156512	0.171579	1
NPLOC4	Cross-ancestry	Brain_Cerebellum	moco_RNFL_q1_all	0.0205133	0.0154584	0.184508	1
NPLOC4	Cross-ancestry	Brain_Cerebellum	moco_RNFL_q3_all	-0.0215743	0.015655	0.16817	1
NPLOC4	Cross-ancestry	Brain_Cerebellum	moco_RNFL_q5_all	-0.0277637	0.0156369	0.0758122	1
NPLOC4	Cross-ancestry	Brain_Cerebellum	moco_RNFL_q7_all	0.00194523	0.0152429	0.898454	1
NPLOC4	Cross-ancestry	Brain_Cerebellum	moco_RNFL_q9_all	0.0358983	0.0158974	0.0239382	1
NPLOC4	Cross-ancestry	Brain_Cortex	auto_GCC_q0_all	0.163552	0.039229	3.05726e-05	1
NPLOC4	Cross-ancestry	Brain_Cortex	auto_GCC_q10_all	0.0648224	0.0304711	0.033392	1
NPLOC4	Cross-ancestry	Brain_Cortex	auto_GCC_q2_all	0.05352	0.02989	0.073363	1
NPLOC4	Cross-ancestry	Brain_Cortex	auto_GCC_q3_all	0.168871	0.0398156	2.2221e-05	1
NPLOC4	Cross-ancestry	Brain_Cortex	auto_GCC_q4_all	-0.117013	0.0345902	0.000717445	1
NPLOC4	Cross-ancestry	Brain_Cortex	auto_GCC_q6_all	-0.0817759	0.0321267	0.0109146	1
NPLOC4	Cross-ancestry	Brain_Cortex	auto_GCC_q8_all	-0.143274	0.0370911	0.00011211	1
NPLOC4	Cross-ancestry	Brain_Cortex	auto_RNFL_q0_all	0.0395583	0.0296386	0.181979	1
NPLOC4	Cross-ancestry	Brain_Cortex	auto_RNFL_q1_all	-0.0176184	0.0287478	0.539968	1
NPLOC4	Cross-ancestry	Brain_Cortex	auto_RNFL_q3_all	-0.0335747	0.0294444	0.254172	1
NPLOC4	Cross-ancestry	Brain_Cortex	auto_RNFL_q4_all	0.0352368	0.0291694	0.227046	1
NPLOC4	Cross-ancestry	Brain_Cortex	auto_RNFL_q6_all	0.077122	0.0315181	0.0144087	1
NPLOC4	Cross-ancestry	Brain_Cortex	auto_RNFL_q7_all	0.0528552	0.0304961	0.0830641	1
NPLOC4	Cross-ancestry	Brain_Cortex	auto_RNFL_q8_all	-0.0455419	0.0298631	0.127253	1
NPLOC4	Cross-ancestry	Brain_Cortex	moco_GCC_q3_all	-0.0804462	0.0317353	0.0112475	1
NPLOC4	Cross-ancestry	Brain_Cortex	moco_GCC_q8_all	-0.0378962	0.0299067	0.205103	1
NPLOC4	Cross-ancestry	Brain_Cortex	moco_RNFL_q1_all	0.0339071	0.0294544	0.249661	1
NPLOC4	Cross-ancestry	Brain_Cortex	moco_RNFL_q3_all	-0.0398907	0.0299747	0.18325	1
NPLOC4	Cross-ancestry	Brain_Cortex	moco_RNFL_q5_all	-0.0505282	0.0300727	0.0929177	1
NPLOC4	Cross-ancestry	Brain_Cortex	moco_RNFL_q7_all	-0.00265938	0.0292734	0.927615	1
NPLOC4	Cross-ancestry	Brain_Cortex	moco_RNFL_q9_all	0.0595036	0.0305003	0.0510663	1
NPLOC4	Cross-ancestry	Brain_Hippocampus	auto_GCC_q0_all	0.145353	0.0378238	0.000121588	1
NPLOC4	Cross-ancestry	Brain_Hippocampus	auto_GCC_q10_all	0.0454824	0.0279859	0.104122	1
NPLOC4	Cross-ancestry	Brain_Hippocampus	auto_GCC_q2_all	0.027035	0.027184	0.31997	1
NPLOC4	Cross-ancestry	Brain_Hippocampus	auto_GCC_q3_all	0.151396	0.0385998	8.7745e-05	1
NPLOC4	Cross-ancestry	Brain_Hippocampus	auto_GCC_q4_all	-0.112593	0.0339288	0.000904995	1
NPLOC4	Cross-ancestry	Brain_Hippocampus	auto_GCC_q6_all	-0.0566145	0.0289465	0.0504845	1
NPLOC4	Cross-ancestry	Brain_Hippocampus	auto_GCC_q8_all	-0.134539	0.0364765	0.00022569	1
NPLOC4	Cross-ancestry	Brain_Hippocampus	auto_RNFL_q0_all	0.032124	0.0276771	0.245776	1
NPLOC4	Cross-ancestry	Brain_Hippocampus	auto_RNFL_q1_all	-0.0139946	0.0268565	0.602306	1
NPLOC4	Cross-ancestry	Brain_Hippocampus	auto_RNFL_q3_all	-0.0279892	0.0275282	0.309274	1
NPLOC4	Cross-ancestry	Brain_Hippocampus	auto_RNFL_q4_all	0.0318059	0.0273542	0.244934	1
NPLOC4	Cross-ancestry	Brain_Hippocampus	auto_RNFL_q6_all	0.0702911	0.0299216	0.0188149	1
NPLOC4	Cross-ancestry	Brain_Hippocampus	auto_RNFL_q7_all	0.0492992	0.0285004	0.0836712	1
NPLOC4	Cross-ancestry	Brain_Hippocampus	auto_RNFL_q8_all	-0.0410296	0.0280636	0.143736	1
NPLOC4	Cross-ancestry	Brain_Hippocampus	moco_GCC_q3_all	-0.0865121	0.0312957	0.00570373	1
NPLOC4	Cross-ancestry	Brain_Hippocampus	moco_GCC_q8_all	-0.0384851	0.028252	0.173132	1
NPLOC4	Cross-ancestry	Brain_Hippocampus	moco_RNFL_q1_all	0.0349865	0.0277916	0.208072	1
NPLOC4	Cross-ancestry	Brain_Hippocampus	moco_RNFL_q3_all	-0.0302156	0.0279175	0.279111	1
NPLOC4	Cross-ancestry	Brain_Hippocampus	moco_RNFL_q5_all	-0.0403935	0.0280331	0.149607	1
NPLOC4	Cross-ancestry	Brain_Hippocampus	moco_RNFL_q7_all	-0.00572506	0.0273911	0.834439	1
NPLOC4	Cross-ancestry	Brain_Hippocampus	moco_RNFL_q9_all	0.0671105	0.029679	0.0237465	1
NPLOC4	Cross-ancestry	Cells_Cultured_fibroblasts	auto_GCC_q0_all	0.240991	0.0537879	7.45068e-06	1
NPLOC4	Cross-ancestry	Cells_Cultured_fibroblasts	auto_GCC_q10_all	0.0759357	0.0452857	0.0935786	1
NPLOC4	Cross-ancestry	Cells_Cultured_fibroblasts	auto_GCC_q2_all	0.0458778	0.0446668	0.304367	1
NPLOC4	Cross-ancestry	Cells_Cultured_fibroblasts	auto_GCC_q3_all	0.25101	0.0544801	4.07801e-06	1
NPLOC4	Cross-ancestry	Cells_Cultured_fibroblasts	auto_GCC_q4_all	-0.185621	0.0503387	0.000226525	1
NPLOC4	Cross-ancestry	Cells_Cultured_fibroblasts	auto_GCC_q6_all	-0.0943924	0.0463205	0.0415689	1
NPLOC4	Cross-ancestry	Cells_Cultured_fibroblasts	auto_GCC_q8_all	-0.221479	0.052497	2.45507e-05	1
NPLOC4	Cross-ancestry	Cells_Cultured_fibroblasts	auto_RNFL_q0_all	0.0511512	0.0452758	0.258574	1
NPLOC4	Cross-ancestry	Cells_Cultured_fibroblasts	auto_RNFL_q1_all	-0.0221479	0.0443912	0.617832	1
NPLOC4	Cross-ancestry	Cells_Cultured_fibroblasts	auto_RNFL_q3_all	-0.0453505	0.0451817	0.315506	1
NPLOC4	Cross-ancestry	Cells_Cultured_fibroblasts	auto_RNFL_q4_all	0.0537878	0.0448008	0.229906	1
NPLOC4	Cross-ancestry	Cells_Cultured_fibroblasts	auto_RNFL_q6_all	0.114958	0.0470218	0.0144938	1
NPLOC4	Cross-ancestry	Cells_Cultured_fibroblasts	auto_RNFL_q7_all	0.0833184	0.0465104	0.0732303	1
NPLOC4	Cross-ancestry	Cells_Cultured_fibroblasts	auto_RNFL_q8_all	-0.0680258	0.0456122	0.135858	1
NPLOC4	Cross-ancestry	Cells_Cultured_fibroblasts	moco_GCC_q3_all	-0.140798	0.0480784	0.003406	1
NPLOC4	Cross-ancestry	Cells_Cultured_fibroblasts	moco_GCC_q8_all	-0.0632798	0.0460277	0.169188	1
NPLOC4	Cross-ancestry	Cells_Cultured_fibroblasts	moco_RNFL_q1_all	0.0590611	0.045422	0.193506	1
NPLOC4	Cross-ancestry	Cells_Cultured_fibroblasts	moco_RNFL_q3_all	-0.0527332	0.0458252	0.249837	1
NPLOC4	Cross-ancestry	Cells_Cultured_fibroblasts	moco_RNFL_q5_all	-0.0690804	0.0456363	0.130098	1
NPLOC4	Cross-ancestry	Cells_Cultured_fibroblasts	moco_RNFL_q7_all	-0.00527332	0.0453662	0.907463	1
NPLOC4	Cross-ancestry	Cells_Cultured_fibroblasts	moco_RNFL_q9_all	0.109685	0.0468299	0.0191704	1
NPLOC4	Cross-ancestry	Nerve_Tibial	auto_GCC_q0_all	-0.0196073	0.0290063	0.499062	2
NPLOC4	Cross-ancestry	Nerve_Tibial	auto_GCC_q10_all	0.00990563	0.0212332	0.640846	3
NPLOC4	Cross-ancestry	Nerve_Tibial	auto_GCC_q2_all	-0.00171815	0.0216276	0.936681	3
NPLOC4	Cross-ancestry	Nerve_Tibial	auto_GCC_q3_all	-0.02154	0.0293803	0.463472	2
NPLOC4	Cross-ancestry	Nerve_Tibial	auto_GCC_q4_all	-0.0610952	0.0216715	0.00481508	3
NPLOC4	Cross-ancestry	Nerve_Tibial	auto_GCC_q6_all	-0.00862813	0.0218912	0.69348	3
NPLOC4	Cross-ancestry	Nerve_Tibial	auto_GCC_q8_all	0.0262381	0.0294373	0.372756	2
NPLOC4	Cross-ancestry	Nerve_Tibial	auto_RNFL_q0_all	0.00501716	0.0214566	0.815118	3
NPLOC4	Cross-ancestry	Nerve_Tibial	auto_RNFL_q1_all	0.00809529	0.0214319	0.705637	3
NPLOC4	Cross-ancestry	Nerve_Tibial	auto_RNFL_q3_all	-0.0219171	0.0217057	0.312621	3
NPLOC4	Cross-ancestry	Nerve_Tibial	auto_RNFL_q4_all	0.0203489	0.021399	0.341641	3
NPLOC4	Cross-ancestry	Nerve_Tibial	auto_RNFL_q6_all	0.0541288	0.0221488	0.0145305	3
NPLOC4	Cross-ancestry	Nerve_Tibial	auto_RNFL_q7_all	0.0222943	0.021685	0.303904	3
NPLOC4	Cross-ancestry	Nerve_Tibial	auto_RNFL_q8_all	0.000291053	0.0220209	0.989455	3
NPLOC4	Cross-ancestry	Nerve_Tibial	moco_GCC_q3_all	-0.0350695	0.0216935	0.105968	3
NPLOC4	Cross-ancestry	Nerve_Tibial	moco_GCC_q8_all	0.00506655	0.0218415	0.816562	3
NPLOC4	Cross-ancestry	Nerve_Tibial	moco_RNFL_q1_all	0.0209165	0.0215907	0.332658	3
NPLOC4	Cross-ancestry	Nerve_Tibial	moco_RNFL_q3_all	-0.0240625	0.0218367	0.270493	3
NPLOC4	Cross-ancestry	Nerve_Tibial	moco_RNFL_q5_all	-0.0295315	0.0216214	0.171988	3
NPLOC4	Cross-ancestry	Nerve_Tibial	moco_RNFL_q7_all	0.0250221	0.021681	0.248458	3
NPLOC4	Cross-ancestry	Nerve_Tibial	moco_RNFL_q9_all	0.049862	0.0219033	0.0228187	3
DYNC1I2	EUR	Artery_Aorta	auto_GCC_q0_EUR	0.105424	0.0435445	0.0154755	1
DYNC1I2	EUR	Artery_Aorta	auto_GCC_q10_EUR	-0.080707	0.0426596	0.0585065	1
DYNC1I2	EUR	Artery_Aorta	auto_GCC_q2_EUR	-0.124591	0.0448464	0.00546646	1
DYNC1I2	EUR	Artery_Aorta	auto_GCC_q3_EUR	0.111477	0.0442704	0.0117996	1
DYNC1I2	EUR	Artery_Aorta	auto_GCC_q4_EUR	-0.187644	0.0479129	8.9898e-05	1
DYNC1I2	EUR	Artery_Aorta	auto_GCC_q6_EUR	0.0761672	0.0435029	0.0799714	1
DYNC1I2	EUR	Artery_Aorta	auto_GCC_q8_EUR	-0.177555	0.0477131	0.000198188	1
DYNC1I2	EUR	Artery_Aorta	auto_RNFL_q0_EUR	-0.037327	0.0421536	0.375887	1
DYNC1I2	EUR	Artery_Aorta	auto_RNFL_q1_EUR	0.164945	0.0469566	0.000443566	1
DYNC1I2	EUR	Artery_Aorta	auto_RNFL_q3_EUR	-0.175033	0.0471149	0.000203177	1
DYNC1I2	EUR	Artery_Aorta	auto_RNFL_q4_EUR	0.11753	0.0445292	0.0083058	1
DYNC1I2	EUR	Artery_Aorta	auto_RNFL_q6_EUR	0.14275	0.0457351	0.00180086	1
DYNC1I2	EUR	Artery_Aorta	auto_RNFL_q7_EUR	-0.102901	0.0439248	0.0191463	1
DYNC1I2	EUR	Artery_Aorta	auto_RNFL_q8_EUR	-0.140733	0.0456313	0.00204147	1
DYNC1I2	EUR	Artery_Aorta	moco_GCC_q3_EUR	-0.167971	0.0471342	0.000365684	1
DYNC1I2	EUR	Artery_Aorta	moco_GCC_q8_EUR	0.0438844	0.0422582	0.299045	1
DYNC1I2	EUR	Artery_Aorta	moco_RNFL_q1_EUR	0.158892	0.0461567	0.000576484	1
DYNC1I2	EUR	Artery_Aorta	moco_RNFL_q3_EUR	-0.10391	0.0439642	0.0181022	1
DYNC1I2	EUR	Artery_Aorta	moco_RNFL_q5_EUR	-0.170494	0.0472841	0.00031128	1
DYNC1I2	EUR	Artery_Aorta	moco_RNFL_q7_EUR	0.167467	0.0471044	0.000377649	1
DYNC1I2	EUR	Artery_Aorta	moco_RNFL_q9_EUR	0.0902909	0.0429769	0.0356481	1
DYNC1I2	EUR	Brain_Cerebellar_Hemisphere	auto_GCC_q0_EUR	0.0575529	0.0236511	0.0149573	1
DYNC1I2	EUR	Brain_Cerebellar_Hemisphere	auto_GCC_q10_EUR	-0.0440597	0.0232229	0.0577948	1
DYNC1I2	EUR	Brain_Cerebellar_Hemisphere	auto_GCC_q2_EUR	-0.0677417	0.0243018	0.00531134	1
DYNC1I2	EUR	Brain_Cerebellar_Hemisphere	auto_GCC_q3_EUR	0.0611328	0.0240439	0.0110047	1
DYNC1I2	EUR	Brain_Cerebellar_Hemisphere	auto_GCC_q4_EUR	-0.102439	0.0257781	7.07174e-05	1
DYNC1I2	EUR	Brain_Cerebellar_Hemisphere	auto_GCC_q6_EUR	0.0404798	0.0236653	0.0871714	1
DYNC1I2	EUR	Brain_Cerebellar_Hemisphere	auto_GCC_q8_EUR	-0.0972066	0.0257242	0.000157581	1
DYNC1I2	EUR	Brain_Cerebellar_Hemisphere	auto_RNFL_q0_EUR	-0.0214791	0.023025	0.350892	1
DYNC1I2	EUR	Brain_Cerebellar_Hemisphere	auto_RNFL_q1_EUR	0.0903223	0.0253541	0.000367436	1
DYNC1I2	EUR	Brain_Cerebellar_Hemisphere	auto_RNFL_q3_EUR	-0.0944529	0.0253277	0.000192065	1
DYNC1I2	EUR	Brain_Cerebellar_Hemisphere	auto_RNFL_q4_EUR	0.0644372	0.0241699	0.00767563	1
DYNC1I2	EUR	Brain_Cerebellar_Hemisphere	auto_RNFL_q6_EUR	0.0773798	0.0247195	0.00174622	1
DYNC1I2	EUR	Brain_Cerebellar_Hemisphere	auto_RNFL_q7_EUR	-0.0559007	0.0238567	0.01912	1
DYNC1I2	EUR	Brain_Cerebellar_Hemisphere	auto_RNFL_q8_EUR	-0.0762783	0.0246693	0.00198795	1
DYNC1I2	EUR	Brain_Cerebellar_Hemisphere	moco_GCC_q3_EUR	-0.090873	0.0253829	0.000343479	1
DYNC1I2	EUR	Brain_Cerebellar_Hemisphere	moco_GCC_q8_EUR	0.0247836	0.0230735	0.282772	1
DYNC1I2	EUR	Brain_Cerebellar_Hemisphere	moco_RNFL_q1_EUR	0.0861917	0.0248927	0.000535115	1
DYNC1I2	EUR	Brain_Cerebellar_Hemisphere	moco_RNFL_q3_EUR	-0.0570022	0.0238949	0.017054	1
DYNC1I2	EUR	Brain_Cerebellar_Hemisphere	moco_RNFL_q5_EUR	-0.0925253	0.0254701	0.000280476	1
DYNC1I2	EUR	Brain_Cerebellar_Hemisphere	moco_RNFL_q7_EUR	0.0911484	0.0253974	0.000332085	1
DYNC1I2	EUR	Brain_Cerebellar_Hemisphere	moco_RNFL_q9_EUR	0.0481902	0.0233427	0.0389733	1
DYNC1I2	EUR	Brain_Cerebellum	auto_GCC_q0_EUR	0.0608324	0.0236767	0.0101907	1
DYNC1I2	EUR	Brain_Cerebellum	auto_GCC_q10_EUR	-0.0332325	0.0228939	0.146617	1
DYNC1I2	EUR	Brain_Cerebellum	auto_GCC_q2_EUR	-0.0470324	0.0235044	0.0453914	1
DYNC1I2	EUR	Brain_Cerebellum	auto_GCC_q3_EUR	0.0625222	0.0240059	0.00920222	1
DYNC1I2	EUR	Brain_Cerebellum	auto_GCC_q4_EUR	-0.0929384	0.025098	0.000213053	1
DYNC1I2	EUR	Brain_Cerebellum	auto_GCC_q6_EUR	0.0157714	0.0231908	0.496461	1
DYNC1I2	EUR	Brain_Cerebellum	auto_GCC_q8_EUR	-0.0850527	0.0249594	0.000655273	1
DYNC1I2	EUR	Brain_Cerebellum	auto_RNFL_q0_EUR	0.00168979	0.0228349	0.94101	1
DYNC1I2	EUR	Brain_Cerebellum	auto_RNFL_q1_EUR	0.066465	0.0241542	0.00592875	1
DYNC1I2	EUR	Brain_Cerebellum	auto_RNFL_q3_EUR	-0.0935016	0.0251274	0.000198354	1
DYNC1I2	EUR	Brain_Cerebellum	auto_RNFL_q4_EUR	0.0568895	0.0235387	0.0156553	1
DYNC1I2	EUR	Brain_Cerebellum	auto_RNFL_q6_EUR	0.0827996	0.0248528	0.000863479	1
DYNC1I2	EUR	Brain_Cerebellum	auto_RNFL_q7_EUR	-0.0419631	0.0233692	0.0725492	1
DYNC1I2	EUR	Brain_Cerebellum	auto_RNFL_q8_EUR	-0.0833629	0.0248792	0.000806069	1
DYNC1I2	EUR	Brain_Cerebellum	moco_GCC_q3_EUR	-0.0873057	0.0248124	0.000433776	1
DYNC1I2	EUR	Brain_Cerebellum	moco_GCC_q8_EUR	-0.00253468	0.022836	0.91162	1
DYNC1I2	EUR	Brain_Cerebellum	moco_RNFL_q1_EUR	0.0892772	0.0249107	0.000338519	1
DYNC1I2	EUR	Brain_Cerebellum	moco_RNFL_q3_EUR	-0.0487222	0.0235527	0.0385788	1
DYNC1I2	EUR	Brain_Cerebellum	moco_RNFL_q5_EUR	-0.0937833	0.0253948	0.000221616	1
DYNC1I2	EUR	Brain_Cerebellum	moco_RNFL_q7_EUR	0.080265	0.0247358	0.00117494	1
DYNC1I2	EUR	Brain_Cerebellum	moco_RNFL_q9_EUR	0.0492855	0.0232966	0.0343819	1
DYNC1I2	EUR	Cells_Cultured_fibroblasts	auto_GCC_q0_EUR	0.0903483	0.0359864	0.0120518	1
DYNC1I2	EUR	Cells_Cultured_fibroblasts	auto_GCC_q10_EUR	-0.0691662	0.0357702	0.0531589	1
DYNC1I2	EUR	Cells_Cultured_fibroblasts	auto_GCC_q2_EUR	-0.106775	0.0366159	0.00354447	1
DYNC1I2	EUR	Cells_Cultured_fibroblasts	auto_GCC_q3_EUR	0.0955358	0.036473	0.00880965	1
DYNC1I2	EUR	Cells_Cultured_fibroblasts	auto_GCC_q4_EUR	-0.160811	0.0370983	1.45937e-05	1
DYNC1I2	EUR	Cells_Cultured_fibroblasts	auto_GCC_q6_EUR	0.0652756	0.0365943	0.0744623	1
DYNC1I2	EUR	Cells_Cultured_fibroblasts	auto_GCC_q8_EUR	-0.152166	0.0373456	4.61085e-05	1
DYNC1I2	EUR	Cells_Cultured_fibroblasts	auto_RNFL_q0_EUR	-0.0319893	0.0359593	0.373681	1
DYNC1I2	EUR	Cells_Cultured_fibroblasts	auto_RNFL_q1_EUR	0.141358	0.0371501	0.000141768	1
DYNC1I2	EUR	Cells_Cultured_fibroblasts	auto_RNFL_q3_EUR	-0.150004	0.0368898	4.77713e-05	1
DYNC1I2	EUR	Cells_Cultured_fibroblasts	auto_RNFL_q4_EUR	0.100723	0.0365371	0.00583805	1
DYNC1I2	EUR	Cells_Cultured_fibroblasts	auto_RNFL_q6_EUR	0.122338	0.0368388	0.000897299	1
DYNC1I2	EUR	Cells_Cultured_fibroblasts	auto_RNFL_q7_EUR	-0.0881869	0.0363879	0.0153709	1
DYNC1I2	EUR	Cells_Cultured_fibroblasts	auto_RNFL_q8_EUR	-0.120608	0.0368126	0.00105183	1
DYNC1I2	EUR	Cells_Cultured_fibroblasts	moco_GCC_q3_EUR	-0.143952	0.0371958	0.000108782	1
DYNC1I2	EUR	Cells_Cultured_fibroblasts	moco_GCC_q8_EUR	0.0376091	0.0359842	0.295951	1
DYNC1I2	EUR	Cells_Cultured_fibroblasts	moco_RNFL_q1_EUR	0.136171	0.0366426	0.000202252	1
DYNC1I2	EUR	Cells_Cultured_fibroblasts	moco_RNFL_q3_EUR	-0.0890514	0.0363976	0.0144199	1
DYNC1I2	EUR	Cells_Cultured_fibroblasts	moco_RNFL_q5_EUR	-0.146114	0.0372345	8.70371e-05	1
DYNC1I2	EUR	Cells_Cultured_fibroblasts	moco_RNFL_q7_EUR	0.14352	0.0371881	0.000113715	1
DYNC1I2	EUR	Cells_Cultured_fibroblasts	moco_RNFL_q9_EUR	0.0773796	0.0358473	0.0308821	1
SLC25A12	Cross-ancestry	Artery_Aorta	auto_GCC_q0_all	-0.0576809	0.0201951	0.00428769	1
SLC25A12	Cross-ancestry	Artery_Aorta	auto_GCC_q10_all	0.0362635	0.0193924	0.0614862	1
SLC25A12	Cross-ancestry	Artery_Aorta	auto_GCC_q2_all	0.056464	0.0201567	0.00509036	1
SLC25A12	Cross-ancestry	Artery_Aorta	auto_GCC_q3_all	-0.0649823	0.0206704	0.00166805	1
SLC25A12	Cross-ancestry	Artery_Aorta	auto_GCC_q4_all	0.0983253	0.0218786	6.98555e-06	1
SLC25A12	Cross-ancestry	Artery_Aorta	auto_GCC_q6_all	-0.0265284	0.0196966	0.178029	1
SLC25A12	Cross-ancestry	Artery_Aorta	auto_GCC_q8_all	0.0927276	0.0216039	1.76932e-05	1
SLC25A12	Cross-ancestry	Artery_Aorta	auto_RNFL_q0_all	0.00511097	0.0192605	0.790732	1
SLC25A12	Cross-ancestry	Artery_Aorta	auto_RNFL_q1_all	-0.0754476	0.0206147	0.000252314	1
SLC25A12	Cross-ancestry	Artery_Aorta	auto_RNFL_q3_all	0.092971	0.0216155	1.69941e-05	1
SLC25A12	Cross-ancestry	Artery_Aorta	auto_RNFL_q4_all	-0.0498928	0.0197278	0.0114366	1
SLC25A12	Cross-ancestry	Artery_Aorta	auto_RNFL_q6_all	-0.0732572	0.0207515	0.000415231	1
SLC25A12	Cross-ancestry	Artery_Aorta	auto_RNFL_q7_all	0.0554905	0.0203591	0.00641863	1
SLC25A12	Cross-ancestry	Artery_Aorta	auto_RNFL_q8_all	0.0749609	0.0208194	0.000317564	1
SLC25A12	Cross-ancestry	Artery_Aorta	moco_GCC_q3_all	0.080802	0.0212845	0.000146877	1
SLC25A12	Cross-ancestry	Artery_Aorta	moco_GCC_q8_all	-0.0209306	0.0196211	0.286089	1
SLC25A12	Cross-ancestry	Artery_Aorta	moco_RNFL_q1_all	-0.0679029	0.0205471	0.000950629	1
SLC25A12	Cross-ancestry	Artery_Aorta	moco_RNFL_q3_all	0.0552471	0.0203517	0.00663511	1
SLC25A12	Cross-ancestry	Artery_Aorta	moco_RNFL_q5_all	0.0783682	0.0209591	0.000184675	1
SLC25A12	Cross-ancestry	Artery_Aorta	moco_RNFL_q7_all	-0.0749609	0.0210443	0.00036798	1
SLC25A12	Cross-ancestry	Artery_Aorta	moco_RNFL_q9_all	-0.0355334	0.0196158	0.0700689	1
SLC25A12	Cross-ancestry	Artery_Tibial	auto_GCC_q0_all	-0.102109	0.034609	0.00317413	1
SLC25A12	Cross-ancestry	Artery_Tibial	auto_GCC_q10_all	0.0606794	0.0332133	0.0677059	1
SLC25A12	Cross-ancestry	Artery_Tibial	auto_GCC_q2_all	0.0937391	0.0339701	0.00578963	1
SLC25A12	Cross-ancestry	Artery_Tibial	auto_GCC_q3_all	-0.115082	0.035012	0.00101292	1
SLC25A12	Cross-ancestry	Artery_Tibial	auto_GCC_q4_all	0.171158	0.0372249	4.26712e-06	1
SLC25A12	Cross-ancestry	Artery_Tibial	auto_GCC_q6_all	-0.0405924	0.0333221	0.223154	1
SLC25A12	Cross-ancestry	Artery_Tibial	auto_GCC_q8_all	0.160696	0.0367576	1.23244e-05	1
SLC25A12	Cross-ancestry	Artery_Tibial	auto_RNFL_q0_all	0.00544022	0.0330794	0.869369	1
SLC25A12	Cross-ancestry	Artery_Tibial	auto_RNFL_q1_all	-0.12638	0.0350074	0.000306074	1
SLC25A12	Cross-ancestry	Artery_Tibial	auto_RNFL_q3_all	0.160696	0.0367576	1.23244e-05	1
SLC25A12	Cross-ancestry	Artery_Tibial	auto_RNFL_q4_all	-0.0836957	0.0337078	0.013029	1
SLC25A12	Cross-ancestry	Artery_Tibial	auto_RNFL_q6_all	-0.122614	0.0352658	0.000507323	1
SLC25A12	Cross-ancestry	Artery_Tibial	auto_RNFL_q7_all	0.0995978	0.0345361	0.00392809	1
SLC25A12	Cross-ancestry	Artery_Tibial	auto_RNFL_q8_all	0.133913	0.0356727	0.000174078	1
SLC25A12	Cross-ancestry	Artery_Tibial	moco_GCC_q3_all	0.140609	0.0359283	9.0935e-05	1
SLC25A12	Cross-ancestry	Artery_Tibial	moco_GCC_q8_all	-0.037663	0.0337034	0.263787	1
SLC25A12	Cross-ancestry	Artery_Tibial	moco_RNFL_q1_all	-0.115918	0.0350395	0.000938909	1
SLC25A12	Cross-ancestry	Artery_Tibial	moco_RNFL_q3_all	0.0975055	0.034878	0.00518015	1
SLC25A12	Cross-ancestry	Artery_Tibial	moco_RNFL_q5_all	0.133913	0.0356727	0.000174078	1
SLC25A12	Cross-ancestry	Artery_Tibial	moco_RNFL_q7_all	-0.125543	0.0353683	0.000385804	1
SLC25A12	Cross-ancestry	Artery_Tibial	moco_RNFL_q9_all	-0.0619348	0.0336475	0.0656659	1
SLC25A12	Cross-ancestry	Brain_Caudate_basal_ganglia	auto_GCC_q0_all	-0.11806	0.046189	0.0105876	1
SLC25A12	Cross-ancestry	Brain_Caudate_basal_ganglia	auto_GCC_q10_all	0.0889351	0.0437818	0.0422221	1
SLC25A12	Cross-ancestry	Brain_Caudate_basal_ganglia	auto_GCC_q2_all	0.12014	0.0463432	0.00953063	1
SLC25A12	Cross-ancestry	Brain_Caudate_basal_ganglia	auto_GCC_q3_all	-0.143544	0.0486714	0.0031854	1
SLC25A12	Cross-ancestry	Brain_Caudate_basal_ganglia	auto_GCC_q4_all	0.223638	0.0563207	7.16336e-05	1
SLC25A12	Cross-ancestry	Brain_Caudate_basal_ganglia	auto_GCC_q6_all	-0.0400468	0.0426834	0.348126	1
SLC25A12	Cross-ancestry	Brain_Caudate_basal_ganglia	auto_GCC_q8_all	0.205955	0.0547437	0.000168448	1
SLC25A12	Cross-ancestry	Brain_Caudate_basal_ganglia	auto_RNFL_q0_all	-0.00104018	0.0416195	0.980061	1
SLC25A12	Cross-ancestry	Brain_Caudate_basal_ganglia	auto_RNFL_q1_all	-0.155506	0.0488399	0.00145253	1
SLC25A12	Cross-ancestry	Brain_Caudate_basal_ganglia	auto_RNFL_q3_all	0.208035	0.0545722	0.000137783	1
SLC25A12	Cross-ancestry	Brain_Caudate_basal_ganglia	auto_RNFL_q4_all	-0.107138	0.04494	0.0171243	1
SLC25A12	Cross-ancestry	Brain_Caudate_basal_ganglia	auto_RNFL_q6_all	-0.157587	0.0494681	0.00144443	1
SLC25A12	Cross-ancestry	Brain_Caudate_basal_ganglia	auto_RNFL_q7_all	0.1191	0.0467341	0.0108197	1
SLC25A12	Cross-ancestry	Brain_Caudate_basal_ganglia	auto_RNFL_q8_all	0.163828	0.0504816	0.00117329	1
SLC25A12	Cross-ancestry	Brain_Caudate_basal_ganglia	moco_GCC_q3_all	0.167468	0.0508244	0.000984073	1
SLC25A12	Cross-ancestry	Brain_Caudate_basal_ganglia	moco_GCC_q8_all	-0.0436874	0.042786	0.307223	1
SLC25A12	Cross-ancestry	Brain_Caudate_basal_ganglia	moco_RNFL_q1_all	-0.150826	0.0488576	0.00202156	1
SLC25A12	Cross-ancestry	Brain_Caudate_basal_ganglia	moco_RNFL_q3_all	0.139904	0.0483652	0.00382005	1
SLC25A12	Cross-ancestry	Brain_Caudate_basal_ganglia	moco_RNFL_q5_all	0.189832	0.0526271	0.000309617	1
SLC25A12	Cross-ancestry	Brain_Caudate_basal_ganglia	moco_RNFL_q7_all	-0.157587	0.0499064	0.00159047	1
SLC25A12	Cross-ancestry	Brain_Caudate_basal_ganglia	moco_RNFL_q9_all	-0.0712521	0.043839	0.104096	1
SLC25A12	Cross-ancestry	Brain_Cerebellar_Hemisphere	auto_GCC_q0_all	-0.0662613	0.0238749	0.00551418	1
SLC25A12	Cross-ancestry	Brain_Cerebellar_Hemisphere	auto_GCC_q10_all	0.0439787	0.0230421	0.0563104	1
SLC25A12	Cross-ancestry	Brain_Cerebellar_Hemisphere	auto_GCC_q2_all	0.061277	0.0237349	0.00983087	1
SLC25A12	Cross-ancestry	Brain_Cerebellar_Hemisphere	auto_GCC_q3_all	-0.0771094	0.024491	0.00164124	1
SLC25A12	Cross-ancestry	Brain_Cerebellar_Hemisphere	auto_GCC_q4_all	0.117277	0.0258488	5.70516e-06	1
SLC25A12	Cross-ancestry	Brain_Cerebellar_Hemisphere	auto_GCC_q6_all	-0.0202302	0.023276	0.384769	1
SLC25A12	Cross-ancestry	Brain_Cerebellar_Hemisphere	auto_GCC_q8_all	0.107015	0.0256423	3.00124e-05	1
SLC25A12	Cross-ancestry	Brain_Cerebellar_Hemisphere	auto_RNFL_q0_all	0.00527745	0.0228972	0.817715	1
SLC25A12	Cross-ancestry	Brain_Cerebellar_Hemisphere	auto_RNFL_q1_all	-0.0847323	0.0244795	0.000537454	1
SLC25A12	Cross-ancestry	Brain_Cerebellar_Hemisphere	auto_RNFL_q3_all	0.105549	0.0255785	3.68382e-05	1
SLC25A12	Cross-ancestry	Brain_Cerebellar_Hemisphere	auto_RNFL_q4_all	-0.0559996	0.0235979	0.0176406	1
SLC25A12	Cross-ancestry	Brain_Cerebellar_Hemisphere	auto_RNFL_q6_all	-0.0785753	0.0245398	0.00136499	1
SLC25A12	Cross-ancestry	Brain_Cerebellar_Hemisphere	auto_RNFL_q7_all	0.0689	0.0242331	0.00446611	1
SLC25A12	Cross-ancestry	Brain_Cerebellar_Hemisphere	auto_RNFL_q8_all	0.0914758	0.0250039	0.000253742	1
SLC25A12	Cross-ancestry	Brain_Cerebellar_Hemisphere	moco_GCC_q3_all	0.0935281	0.0250834	0.000192482	1
SLC25A12	Cross-ancestry	Brain_Cerebellar_Hemisphere	moco_GCC_q8_all	-0.0211098	0.0235759	0.370575	1
SLC25A12	Cross-ancestry	Brain_Cerebellar_Hemisphere	moco_RNFL_q1_all	-0.0756434	0.024443	0.00197025	1
SLC25A12	Cross-ancestry	Brain_Cerebellar_Hemisphere	moco_RNFL_q3_all	0.0686068	0.0242244	0.00462385	1
SLC25A12	Cross-ancestry	Brain_Cerebellar_Hemisphere	moco_RNFL_q5_all	0.0914758	0.0250039	0.000253742	1
SLC25A12	Cross-ancestry	Brain_Cerebellar_Hemisphere	moco_RNFL_q7_all	-0.0876643	0.0248604	0.000421473	1
SLC25A12	Cross-ancestry	Brain_Cerebellar_Hemisphere	moco_RNFL_q9_all	-0.0384081	0.0235148	0.102394	1
SLC25A12	Cross-ancestry	Brain_Cerebellum	auto_GCC_q0_all	-0.0696133	0.0234777	0.00302605	1
SLC25A12	Cross-ancestry	Brain_Cerebellum	auto_GCC_q10_all	0.0436845	0.022488	0.0520685	1
SLC25A12	Cross-ancestry	Brain_Cerebellum	auto_GCC_q2_all	0.0608765	0.0229329	0.0079415	1
SLC25A12	Cross-ancestry	Brain_Cerebellum	auto_GCC_q3_all	-0.0811686	0.0238912	0.000680228	1
SLC25A12	Cross-ancestry	Brain_Cerebellum	auto_GCC_q4_all	0.119498	0.0256369	3.14392e-06	1
SLC25A12	Cross-ancestry	Brain_Cerebellum	auto_GCC_q6_all	-0.0214195	0.0224028	0.339019	1
SLC25A12	Cross-ancestry	Brain_Cerebellum	auto_GCC_q8_all	0.111325	0.0252199	1.01395e-05	1
SLC25A12	Cross-ancestry	Brain_Cerebellum	auto_RNFL_q0_all	0.00507304	0.0222939	0.819994	1
SLC25A12	Cross-ancestry	Brain_Cerebellum	auto_RNFL_q1_all	-0.0882145	0.023911	0.000224881	1
SLC25A12	Cross-ancestry	Brain_Cerebellum	auto_RNFL_q3_all	0.109352	0.0251227	1.34454e-05	1
SLC25A12	Cross-ancestry	Brain_Cerebellum	auto_RNFL_q4_all	-0.0605946	0.0229245	0.00821206	1
SLC25A12	Cross-ancestry	Brain_Cerebellum	auto_RNFL_q6_all	-0.0876508	0.0241473	0.000283593	1
SLC25A12	Cross-ancestry	Brain_Cerebellum	auto_RNFL_q7_all	0.0648221	0.0235922	0.00600321	1
SLC25A12	Cross-ancestry	Brain_Cerebellum	auto_RNFL_q8_all	0.0893418	0.0242168	0.000224921	1
SLC25A12	Cross-ancestry	Brain_Cerebellum	moco_GCC_q3_all	0.0952604	0.0244691	9.89758e-05	1
SLC25A12	Cross-ancestry	Brain_Cerebellum	moco_GCC_q8_all	-0.0202922	0.0226713	0.370756	1
SLC25A12	Cross-ancestry	Brain_Cerebellum	moco_RNFL_q1_all	-0.0828596	0.0239564	0.000542643	1
SLC25A12	Cross-ancestry	Brain_Cerebellum	moco_RNFL_q3_all	0.070177	0.0237638	0.00314597	1
SLC25A12	Cross-ancestry	Brain_Cerebellum	moco_RNFL_q5_all	0.0975151	0.0245687	7.21531e-05	1
SLC25A12	Cross-ancestry	Brain_Cerebellum	moco_RNFL_q7_all	-0.0899055	0.0244994	0.000242833	1
SLC25A12	Cross-ancestry	Brain_Cerebellum	moco_RNFL_q9_all	-0.0448118	0.0227882	0.049247	1
SLC25A12	Cross-ancestry	Brain_Cortex	auto_GCC_q0_all	-0.093068	0.0339693	0.00614828	1
SLC25A12	Cross-ancestry	Brain_Cortex	auto_GCC_q10_all	0.0599421	0.0319812	0.0608906	1
SLC25A12	Cross-ancestry	Brain_Cortex	auto_GCC_q2_all	0.0895188	0.0337679	0.00802536	1
SLC25A12	Cross-ancestry	Brain_Cortex	auto_GCC_q3_all	-0.105293	0.0350669	0.00267657	1
SLC25A12	Cross-ancestry	Brain_Cortex	auto_GCC_q4_all	0.158925	0.038772	4.14981e-05	1
SLC25A12	Cross-ancestry	Brain_Cortex	auto_GCC_q6_all	-0.0323372	0.0319111	0.310892	1
SLC25A12	Cross-ancestry	Brain_Cortex	auto_GCC_q8_all	0.148672	0.0382309	0.000100743	1
SLC25A12	Cross-ancestry	Brain_Cortex	auto_RNFL_q0_all	-0.00118307	0.0311706	0.969724	1
SLC25A12	Cross-ancestry	Brain_Cortex	auto_RNFL_q1_all	-0.117124	0.0351559	0.000863633	1
SLC25A12	Cross-ancestry	Brain_Cortex	auto_RNFL_q3_all	0.157348	0.0386363	4.65026e-05	1
SLC25A12	Cross-ancestry	Brain_Cortex	auto_RNFL_q4_all	-0.0768994	0.032736	0.0188201	1
SLC25A12	Cross-ancestry	Brain_Cortex	auto_RNFL_q6_all	-0.121462	0.035807	0.00069354	1
SLC25A12	Cross-ancestry	Brain_Cortex	auto_RNFL_q7_all	0.093068	0.0343314	0.00671058	1
SLC25A12	Cross-ancestry	Brain_Cortex	auto_RNFL_q8_all	0.125405	0.036092	0.000511625	1
SLC25A12	Cross-ancestry	Brain_Cortex	moco_GCC_q3_all	0.134475	0.0371077	0.000290171	1
SLC25A12	Cross-ancestry	Brain_Cortex	moco_GCC_q8_all	-0.0256331	0.0317827	0.419947	1
SLC25A12	Cross-ancestry	Brain_Cortex	moco_RNFL_q1_all	-0.115941	0.0354196	0.00106283	1
SLC25A12	Cross-ancestry	Brain_Cortex	moco_RNFL_q3_all	0.0958285	0.0344908	0.00546315	1
SLC25A12	Cross-ancestry	Brain_Cortex	moco_RNFL_q5_all	0.132109	0.036592	0.000305809	1
SLC25A12	Cross-ancestry	Brain_Cortex	moco_RNFL_q7_all	-0.115152	0.0357133	0.00126262	1
SLC25A12	Cross-ancestry	Brain_Cortex	moco_RNFL_q9_all	-0.0615195	0.032423	0.0577745	1
SLC25A12	Cross-ancestry	Brain_Nucleus_accumbens_basal_ganglia	auto_GCC_q0_all	-0.113133	0.0423814	0.00759859	1
SLC25A12	Cross-ancestry	Brain_Nucleus_accumbens_basal_ganglia	auto_GCC_q10_all	0.0711258	0.0391765	0.0694437	1
SLC25A12	Cross-ancestry	Brain_Nucleus_accumbens_basal_ganglia	auto_GCC_q2_all	0.110746	0.0421972	0.00867785	1
SLC25A12	Cross-ancestry	Brain_Nucleus_accumbens_basal_ganglia	auto_GCC_q3_all	-0.127454	0.043964	0.00374301	1
SLC25A12	Cross-ancestry	Brain_Nucleus_accumbens_basal_ganglia	auto_GCC_q4_all	0.192851	0.0500715	0.00011739	1
SLC25A12	Cross-ancestry	Brain_Nucleus_accumbens_basal_ganglia	auto_GCC_q6_all	-0.0520316	0.0392207	0.184628	1
SLC25A12	Cross-ancestry	Brain_Nucleus_accumbens_basal_ganglia	auto_GCC_q8_all	0.181872	0.0488594	0.000197374	1
SLC25A12	Cross-ancestry	Brain_Nucleus_accumbens_basal_ganglia	auto_RNFL_q0_all	0.0100244	0.037763	0.790658	1
SLC25A12	Cross-ancestry	Brain_Nucleus_accumbens_basal_ganglia	auto_RNFL_q1_all	-0.14798	0.0450068	0.00100923	1
SLC25A12	Cross-ancestry	Brain_Nucleus_accumbens_basal_ganglia	auto_RNFL_q3_all	0.182349	0.0489112	0.000192876	1
SLC25A12	Cross-ancestry	Brain_Nucleus_accumbens_basal_ganglia	auto_RNFL_q4_all	-0.0978576	0.0408223	0.0165227	1
SLC25A12	Cross-ancestry	Brain_Nucleus_accumbens_basal_ganglia	auto_RNFL_q6_all	-0.143684	0.0449985	0.00140767	1
SLC25A12	Cross-ancestry	Brain_Nucleus_accumbens_basal_ganglia	auto_RNFL_q7_all	0.108837	0.0424808	0.0104064	1
SLC25A12	Cross-ancestry	Brain_Nucleus_accumbens_basal_ganglia	auto_RNFL_q8_all	0.147025	0.045312	0.00117564	1
SLC25A12	Cross-ancestry	Brain_Nucleus_accumbens_basal_ganglia	moco_GCC_q3_all	0.158482	0.0468127	0.000710641	1
SLC25A12	Cross-ancestry	Brain_Nucleus_accumbens_basal_ganglia	moco_GCC_q8_all	-0.0410525	0.0388391	0.290516	1
SLC25A12	Cross-ancestry	Brain_Nucleus_accumbens_basal_ganglia	moco_RNFL_q1_all	-0.133182	0.0440468	0.00249749	1
SLC25A12	Cross-ancestry	Brain_Nucleus_accumbens_basal_ganglia	moco_RNFL_q3_all	0.108359	0.0424452	0.0106822	1
SLC25A12	Cross-ancestry	Brain_Nucleus_accumbens_basal_ganglia	moco_RNFL_q5_all	0.153708	0.0459539	0.000823325	1
SLC25A12	Cross-ancestry	Brain_Nucleus_accumbens_basal_ganglia	moco_RNFL_q7_all	-0.147025	0.0457101	0.00129778	1
SLC25A12	Cross-ancestry	Brain_Nucleus_accumbens_basal_ganglia	moco_RNFL_q9_all	-0.0696937	0.0395562	0.0780878	1
SLC25A12	Cross-ancestry	Nerve_Tibial	auto_GCC_q0_all	0.0142332	0.030687	0.642777	1
SLC25A12	Cross-ancestry	Nerve_Tibial	auto_GCC_q10_all	0.00333118	0.030002	0.911591	1
SLC25A12	Cross-ancestry	Nerve_Tibial	auto_GCC_q2_all	-0.0127191	0.0303681	0.67534	1
SLC25A12	Cross-ancestry	Nerve_Tibial	auto_GCC_q3_all	0.00242268	0.0309078	0.937522	1
SLC25A12	Cross-ancestry	Nerve_Tibial	auto_GCC_q4_all	-0.00272551	0.0306058	0.92904	1
SLC25A12	Cross-ancestry	Nerve_Tibial	auto_GCC_q6_all	-0.00969071	0.0309441	0.754153	1
SLC25A12	Cross-ancestry	Nerve_Tibial	auto_GCC_q8_all	-0.00423969	0.0309128	0.890912	1
SLC25A12	Cross-ancestry	Nerve_Tibial	auto_RNFL_q0_all	0.075103	0.0328709	0.0223254	1
SLC25A12	Cross-ancestry	Nerve_Tibial	auto_RNFL_q1_all	-0.0699548	0.0322956	0.0303049	1
SLC25A12	Cross-ancestry	Nerve_Tibial	auto_RNFL_q3_all	-0.00211984	0.0309072	0.945318	1
SLC25A12	Cross-ancestry	Nerve_Tibial	auto_RNFL_q4_all	-0.0523904	0.0314349	0.0955871	1
SLC25A12	Cross-ancestry	Nerve_Tibial	auto_RNFL_q6_all	-0.0230154	0.0308228	0.455243	1
SLC25A12	Cross-ancestry	Nerve_Tibial	auto_RNFL_q7_all	-0.00575386	0.030919	0.852371	1
SLC25A12	Cross-ancestry	Nerve_Tibial	auto_RNFL_q8_all	-0.0287693	0.0312453	0.357177	1
SLC25A12	Cross-ancestry	Nerve_Tibial	moco_GCC_q3_all	-0.0308892	0.0315958	0.328255	1
SLC25A12	Cross-ancestry	Nerve_Tibial	moco_GCC_q8_all	0.0266495	0.0314971	0.397501	1
SLC25A12	Cross-ancestry	Nerve_Tibial	moco_RNFL_q1_all	-0.05875	0.0320098	0.0664501	1
SLC25A12	Cross-ancestry	Nerve_Tibial	moco_RNFL_q3_all	-0.00817654	0.0312353	0.793497	1
SLC25A12	Cross-ancestry	Nerve_Tibial	moco_RNFL_q5_all	0.0448196	0.031724	0.157716	1
SLC25A12	Cross-ancestry	Nerve_Tibial	moco_RNFL_q7_all	-0.0681378	0.0327666	0.0375722	1
SLC25A12	Cross-ancestry	Nerve_Tibial	moco_RNFL_q9_all	-0.0572358	0.0322298	0.0757551	1
ATOH7	Cross-ancestry	Artery_Aorta	auto_GCC_q0_all	-0.0236251	0.0202513	0.243375	1
ATOH7	Cross-ancestry	Artery_Aorta	auto_GCC_q10_all	0.0597313	0.0220381	0.00672099	1
ATOH7	Cross-ancestry	Artery_Aorta	auto_GCC_q2_all	0.0809047	0.0240402	0.000764354	1
ATOH7	Cross-ancestry	Artery_Aorta	auto_GCC_q3_all	-0.0372206	0.0210284	0.0767243	1
ATOH7	Cross-ancestry	Artery_Aorta	auto_GCC_q4_all	0.0826877	0.0242097	0.000636683	1
ATOH7	Cross-ancestry	Artery_Aorta	auto_GCC_q6_all	-0.0392265	0.0211303	0.0633955	1
ATOH7	Cross-ancestry	Artery_Aorta	auto_GCC_q8_all	0.0726582	0.0234804	0.001972	1
ATOH7	Cross-ancestry	Artery_Aorta	auto_RNFL_q0_all	-0.00468044	0.0198768	0.813842	1
ATOH7	Cross-ancestry	Artery_Aorta	auto_RNFL_q1_all	-0.0722125	0.0230616	0.0017404	1
ATOH7	Cross-ancestry	Artery_Aorta	auto_RNFL_q3_all	0.125035	0.0290094	1.6315e-05	1
ATOH7	Cross-ancestry	Artery_Aorta	auto_RNFL_q4_all	-0.0786759	0.0236468	0.000877457	1
ATOH7	Cross-ancestry	Artery_Aorta	auto_RNFL_q6_all	-0.142642	0.0310604	4.38179e-06	1
ATOH7	Cross-ancestry	Artery_Aorta	auto_RNFL_q7_all	0.012704	0.0201962	0.529329	1
ATOH7	Cross-ancestry	Artery_Aorta	auto_RNFL_q8_all	0.0809047	0.0242244	0.000838398	1
ATOH7	Cross-ancestry	Artery_Aorta	moco_GCC_q3_all	0.0965062	0.025776	0.000181089	1
ATOH7	Cross-ancestry	Artery_Aorta	moco_GCC_q8_all	0.00980663	0.0203728	0.630261	1
ATOH7	Cross-ancestry	Artery_Aorta	moco_RNFL_q1_all	-0.113222	0.0274549	3.72459e-05	1
ATOH7	Cross-ancestry	Artery_Aorta	moco_RNFL_q3_all	0.0300885	0.020706	0.146187	1
ATOH7	Cross-ancestry	Artery_Aorta	moco_RNFL_q5_all	0.0826877	0.0242097	0.000636683	1
ATOH7	Cross-ancestry	Artery_Aorta	moco_RNFL_q7_all	-0.0670863	0.023011	0.00355233	1
ATOH7	Cross-ancestry	Artery_Aorta	moco_RNFL_q9_all	-0.102301	0.0263949	0.000106281	1
ATOH7	Cross-ancestry	Artery_Tibial	auto_GCC_q0_all	-0.0200591	0.0163518	0.219929	1
ATOH7	Cross-ancestry	Artery_Tibial	auto_GCC_q10_all	0.0486889	0.0166157	0.00338647	1
ATOH7	Cross-ancestry	Artery_Tibial	auto_GCC_q2_all	0.0652832	0.0172042	0.000147873	1
ATOH7	Cross-ancestry	Artery_Tibial	auto_GCC_q3_all	-0.0315475	0.0166652	0.0583556	1
ATOH7	Cross-ancestry	Artery_Tibial	auto_GCC_q4_all	0.0682009	0.0172878	7.97938e-05	1
ATOH7	Cross-ancestry	Artery_Tibial	auto_GCC_q6_all	-0.0310004	0.0166576	0.0627386	1
ATOH7	Cross-ancestry	Artery_Tibial	auto_GCC_q8_all	0.0598125	0.0172298	0.000517622	1
ATOH7	Cross-ancestry	Artery_Tibial	auto_RNFL_q0_all	-0.00510595	0.0162663	0.7536	1
ATOH7	Cross-ancestry	Artery_Tibial	auto_RNFL_q1_all	-0.0587184	0.0168542	0.00049417	1
ATOH7	Cross-ancestry	Artery_Tibial	auto_RNFL_q3_all	0.103943	0.0187194	2.81361e-08	1
ATOH7	Cross-ancestry	Artery_Tibial	auto_RNFL_q4_all	-0.0641891	0.0170014	0.000159678	1
ATOH7	Cross-ancestry	Artery_Tibial	auto_RNFL_q6_all	-0.117984	0.0191718	7.55325e-10	1
ATOH7	Cross-ancestry	Artery_Tibial	auto_RNFL_q7_all	0.011306	0.0164712	0.492453	1
ATOH7	Cross-ancestry	Artery_Tibial	auto_RNFL_q8_all	0.0671068	0.0174277	0.000117839	1
ATOH7	Cross-ancestry	Artery_Tibial	moco_GCC_q3_all	0.0796893	0.0178161	7.71715e-06	1
ATOH7	Cross-ancestry	Artery_Tibial	moco_GCC_q8_all	0.00820599	0.0166394	0.621896	1
ATOH7	Cross-ancestry	Artery_Tibial	moco_RNFL_q1_all	-0.0933659	0.0181383	2.64077e-07	1
ATOH7	Cross-ancestry	Artery_Tibial	moco_RNFL_q3_all	0.024618	0.0165784	0.13756	1
ATOH7	Cross-ancestry	Artery_Tibial	moco_RNFL_q5_all	0.0680185	0.0172825	8.29605e-05	1
ATOH7	Cross-ancestry	Artery_Tibial	moco_RNFL_q7_all	-0.0547066	0.0171035	0.00138119	1
ATOH7	Cross-ancestry	Artery_Tibial	moco_RNFL_q9_all	-0.0842481	0.0179708	2.75825e-06	1
ATOH7	Cross-ancestry	Nerve_Tibial	auto_GCC_q0_all	-0.0288526	0.024653	0.241861	1
ATOH7	Cross-ancestry	Nerve_Tibial	auto_GCC_q10_all	0.072948	0.0264953	0.00590072	1
ATOH7	Cross-ancestry	Nerve_Tibial	auto_GCC_q2_all	0.0988064	0.0286586	0.000565369	1
ATOH7	Cross-ancestry	Nerve_Tibial	auto_GCC_q3_all	-0.0454564	0.0255056	0.0747146	1
ATOH7	Cross-ancestry	Nerve_Tibial	auto_GCC_q4_all	0.100984	0.0288395	0.000462505	1
ATOH7	Cross-ancestry	Nerve_Tibial	auto_GCC_q6_all	-0.0479061	0.0256126	0.0614264	1
ATOH7	Cross-ancestry	Nerve_Tibial	auto_GCC_q8_all	0.0887353	0.0280965	0.00158728	1
ATOH7	Cross-ancestry	Nerve_Tibial	auto_RNFL_q0_all	-0.00571607	0.024262	0.813745	1
ATOH7	Cross-ancestry	Nerve_Tibial	auto_RNFL_q1_all	-0.0881909	0.0275814	0.00138635	1
ATOH7	Cross-ancestry	Nerve_Tibial	auto_RNFL_q3_all	0.152701	0.0340398	7.25901e-06	1
ATOH7	Cross-ancestry	Nerve_Tibial	auto_RNFL_q4_all	-0.0960845	0.0282049	0.000657631	1
ATOH7	Cross-ancestry	Nerve_Tibial	auto_RNFL_q6_all	-0.174204	0.0362428	1.5353e-06	1
ATOH7	Cross-ancestry	Nerve_Tibial	auto_RNFL_q7_all	0.0155151	0.024635	0.528827	1
ATOH7	Cross-ancestry	Nerve_Tibial	auto_RNFL_q8_all	0.0988064	0.0288891	0.000625744	1
ATOH7	Cross-ancestry	Nerve_Tibial	moco_GCC_q3_all	0.11786	0.0305499	0.00011434	1
ATOH7	Cross-ancestry	Nerve_Tibial	moco_GCC_q8_all	0.0119765	0.0248589	0.629962	1
ATOH7	Cross-ancestry	Nerve_Tibial	moco_RNFL_q1_all	-0.138275	0.0323275	1.89173e-05	1
ATOH7	Cross-ancestry	Nerve_Tibial	moco_RNFL_q3_all	0.0367462	0.0251677	0.144276	1
ATOH7	Cross-ancestry	Nerve_Tibial	moco_RNFL_q5_all	0.100984	0.0288395	0.000462505	1
ATOH7	Cross-ancestry	Nerve_Tibial	moco_RNFL_q7_all	-0.0819304	0.0275978	0.00299039	1
ATOH7	Cross-ancestry	Nerve_Tibial	moco_RNFL_q9_all	-0.124937	0.0312151	6.26891e-05	1
LIN52	Cross-ancestry	retina	auto_GCC_q0_all	-0.159067	0.0856646	0.063332	3
LIN52	Cross-ancestry	retina	auto_GCC_q10_all	0.012888	0.0826983	0.876157	3
LIN52	Cross-ancestry	retina	auto_GCC_q2_all	0.0710041	0.0839855	0.39787	3
LIN52	Cross-ancestry	retina	auto_GCC_q3_all	-0.136435	0.0857619	0.111641	3
LIN52	Cross-ancestry	retina	auto_GCC_q4_all	0.19019	0.0850877	0.0254029	3
LIN52	Cross-ancestry	retina	auto_GCC_q6_all	-0.0118578	0.0847162	0.888683	3
LIN52	Cross-ancestry	retina	auto_GCC_q8_all	0.183801	0.0863192	0.0332283	3
LIN52	Cross-ancestry	retina	auto_RNFL_q0_all	0.21026	0.0858367	0.0143043	3
LIN52	Cross-ancestry	retina	auto_RNFL_q1_all	-0.184887	0.0837829	0.0273321	3
LIN52	Cross-ancestry	retina	auto_RNFL_q3_all	-0.0105253	0.0833187	0.899474	3
LIN52	Cross-ancestry	retina	auto_RNFL_q4_all	-0.323645	0.0872115	0.000206415	3
LIN52	Cross-ancestry	retina	auto_RNFL_q6_all	-0.151461	0.0838339	0.0708113	3
LIN52	Cross-ancestry	retina	auto_RNFL_q7_all	-0.152283	0.0852662	0.074103	3
LIN52	Cross-ancestry	retina	auto_RNFL_q8_all	0.0504961	0.0839481	0.547497	3
LIN52	Cross-ancestry	retina	moco_GCC_q3_all	0.214626	0.0871916	0.0138341	3
LIN52	Cross-ancestry	retina	moco_GCC_q8_all	-0.109189	0.084776	0.197757	3
LIN52	Cross-ancestry	retina	moco_RNFL_q1_all	-0.15418	0.0860024	0.0730145	3
LIN52	Cross-ancestry	retina	moco_RNFL_q3_all	0.114982	0.0846213	0.174215	3
LIN52	Cross-ancestry	retina	moco_RNFL_q5_all	0.132689	0.0846592	0.117036	3
LIN52	Cross-ancestry	retina	moco_RNFL_q7_all	-0.0618844	0.0845846	0.464396	3
LIN52	Cross-ancestry	retina	moco_RNFL_q9_all	-0.110453	0.0849729	0.193647	3
LIN52	Cross-ancestry	Artery_Aorta	auto_GCC_q0_all	0.0336057	0.0303277	0.267824	1
LIN52	Cross-ancestry	Artery_Aorta	auto_GCC_q10_all	0.00553506	0.0296763	0.852041	1
LIN52	Cross-ancestry	Artery_Aorta	auto_GCC_q2_all	0.00395362	0.0300678	0.895388	1
LIN52	Cross-ancestry	Artery_Aorta	auto_GCC_q3_all	0.0253031	0.030607	0.408402	1
LIN52	Cross-ancestry	Artery_Aorta	auto_GCC_q4_all	-0.0253031	0.0302138	0.402329	1
LIN52	Cross-ancestry	Artery_Aorta	auto_GCC_q6_all	0.00672115	0.0304697	0.825416	1
LIN52	Cross-ancestry	Artery_Aorta	auto_GCC_q8_all	-0.018582	0.0305391	0.542878	1
LIN52	Cross-ancestry	Artery_Aorta	auto_RNFL_q0_all	-0.0727465	0.0312801	0.0200372	1
LIN52	Cross-ancestry	Artery_Aorta	auto_RNFL_q1_all	0.0751187	0.031359	0.0166003	1
LIN52	Cross-ancestry	Artery_Aorta	auto_RNFL_q3_all	0.00197681	0.0304602	0.948255	1
LIN52	Cross-ancestry	Artery_Aorta	auto_RNFL_q4_all	0.0873749	0.0318034	0.00600802	1
LIN52	Cross-ancestry	Artery_Aorta	auto_RNFL_q6_all	0.0446759	0.0305284	0.143353	1
LIN52	Cross-ancestry	Artery_Aorta	auto_RNFL_q7_all	0.028466	0.0306462	0.352961	1
LIN52	Cross-ancestry	Artery_Aorta	auto_RNFL_q8_all	0.00237217	0.0304606	0.937926	1
LIN52	Cross-ancestry	Artery_Aorta	moco_GCC_q3_all	-0.0379547	0.0307908	0.217701	1
LIN52	Cross-ancestry	Artery_Aorta	moco_GCC_q8_all	0.00869796	0.0304768	0.775341	1
LIN52	Cross-ancestry	Artery_Aorta	moco_RNFL_q1_all	0.084212	0.0316829	0.00786148	1
LIN52	Cross-ancestry	Artery_Aorta	moco_RNFL_q3_all	0.00553506	0.0304664	0.855836	1
LIN52	Cross-ancestry	Artery_Aorta	moco_RNFL_q5_all	-0.0375594	0.0307839	0.222429	1
LIN52	Cross-ancestry	Artery_Aorta	moco_RNFL_q7_all	0.0569321	0.0312002	0.0680411	1
LIN52	Cross-ancestry	Artery_Aorta	moco_RNFL_q9_all	0.0802584	0.0319149	0.0119111	1
LIN52	Cross-ancestry	Artery_Coronary	auto_GCC_q0_all	0.0328382	0.0299183	0.272382	1
LIN52	Cross-ancestry	Artery_Coronary	auto_GCC_q10_all	0.00540864	0.0290071	0.852085	1
LIN52	Cross-ancestry	Artery_Coronary	auto_GCC_q2_all	0.00386332	0.0293858	0.895404	1
LIN52	Cross-ancestry	Artery_Coronary	auto_GCC_q3_all	0.0247252	0.0300678	0.410897	1
LIN52	Cross-ancestry	Artery_Coronary	auto_GCC_q4_all	-0.0247252	0.0296856	0.4049	1
LIN52	Cross-ancestry	Artery_Coronary	auto_GCC_q6_all	0.00656764	0.0297858	0.825485	1
LIN52	Cross-ancestry	Artery_Coronary	auto_GCC_q8_all	-0.0181576	0.0299284	0.544049	1
LIN52	Cross-ancestry	Artery_Coronary	auto_RNFL_q0_all	-0.071085	0.03183	0.0255312	1
LIN52	Cross-ancestry	Artery_Coronary	auto_RNFL_q1_all	0.073403	0.0319859	0.0217414	1
LIN52	Cross-ancestry	Artery_Coronary	auto_RNFL_q3_all	0.00193166	0.0297662	0.948258	1
LIN52	Cross-ancestry	Artery_Coronary	auto_RNFL_q4_all	0.0853793	0.0328569	0.00936258	1
LIN52	Cross-ancestry	Artery_Coronary	auto_RNFL_q6_all	0.0436555	0.0303262	0.150001	1
LIN52	Cross-ancestry	Artery_Coronary	auto_RNFL_q7_all	0.0278159	0.0301479	0.356191	1
LIN52	Cross-ancestry	Artery_Coronary	auto_RNFL_q8_all	0.00231799	0.029767	0.937931	1
LIN52	Cross-ancestry	Artery_Coronary	moco_GCC_q3_all	-0.0370878	0.0304428	0.223118	1
LIN52	Cross-ancestry	Artery_Coronary	moco_GCC_q8_all	0.00849929	0.0298004	0.775485	1
LIN52	Cross-ancestry	Artery_Coronary	moco_RNFL_q1_all	0.0822886	0.0326218	0.0116523	1
LIN52	Cross-ancestry	Artery_Coronary	moco_RNFL_q3_all	0.00540864	0.0297789	0.855876	1
LIN52	Cross-ancestry	Artery_Coronary	moco_RNFL_q5_all	-0.0367015	0.0304289	0.227764	1
LIN52	Cross-ancestry	Artery_Coronary	moco_RNFL_q7_all	0.0556317	0.0312703	0.0752296	1
LIN52	Cross-ancestry	Artery_Coronary	moco_RNFL_q9_all	0.0784253	0.0326891	0.0164343	1
LIN52	Cross-ancestry	Brain_Anterior_cingulate_cortex_BA24	auto_GCC_q0_all	0.0192885	0.0175902	0.272839	1
LIN52	Cross-ancestry	Brain_Anterior_cingulate_cortex_BA24	auto_GCC_q10_all	0.00317692	0.0170573	0.852249	1
LIN52	Cross-ancestry	Brain_Anterior_cingulate_cortex_BA24	auto_GCC_q2_all	0.00226923	0.0172795	0.895518	1
LIN52	Cross-ancestry	Brain_Anterior_cingulate_cortex_BA24	auto_GCC_q3_all	0.0145231	0.0176787	0.41136	1
LIN52	Cross-ancestry	Brain_Anterior_cingulate_cortex_BA24	auto_GCC_q4_all	-0.0145231	0.0174544	0.405377	1
LIN52	Cross-ancestry	Brain_Anterior_cingulate_cortex_BA24	auto_GCC_q6_all	0.00385769	0.0175142	0.825668	1
LIN52	Cross-ancestry	Brain_Anterior_cingulate_cortex_BA24	auto_GCC_q8_all	-0.0106654	0.0175973	0.544462	1
LIN52	Cross-ancestry	Brain_Anterior_cingulate_cortex_BA24	auto_RNFL_q0_all	-0.0417538	0.0187056	0.0256045	1
LIN52	Cross-ancestry	Brain_Anterior_cingulate_cortex_BA24	auto_RNFL_q1_all	0.0431154	0.0187966	0.0218025	1
LIN52	Cross-ancestry	Brain_Anterior_cingulate_cortex_BA24	auto_RNFL_q3_all	0.00113462	0.0175028	0.948313	1
LIN52	Cross-ancestry	Brain_Anterior_cingulate_cortex_BA24	auto_RNFL_q4_all	0.05015	0.0193049	0.00938281	1
LIN52	Cross-ancestry	Brain_Anterior_cingulate_cortex_BA24	auto_RNFL_q6_all	0.0256423	0.0178281	0.150347	1
LIN52	Cross-ancestry	Brain_Anterior_cingulate_cortex_BA24	auto_RNFL_q7_all	0.0163385	0.0177254	0.356656	1
LIN52	Cross-ancestry	Brain_Anterior_cingulate_cortex_BA24	auto_RNFL_q8_all	0.00136154	0.0175032	0.937997	1
LIN52	Cross-ancestry	Brain_Anterior_cingulate_cortex_BA24	moco_GCC_q3_all	-0.0217846	0.0178975	0.223532	1
LIN52	Cross-ancestry	Brain_Anterior_cingulate_cortex_BA24	moco_GCC_q8_all	0.00499231	0.0175227	0.775717	1
LIN52	Cross-ancestry	Brain_Anterior_cingulate_cortex_BA24	moco_RNFL_q1_all	0.0483346	0.0191677	0.0116801	1
LIN52	Cross-ancestry	Brain_Anterior_cingulate_cortex_BA24	moco_RNFL_q3_all	0.00317692	0.0175102	0.856028	1
LIN52	Cross-ancestry	Brain_Anterior_cingulate_cortex_BA24	moco_RNFL_q5_all	-0.0215577	0.0178893	0.228181	1
LIN52	Cross-ancestry	Brain_Anterior_cingulate_cortex_BA24	moco_RNFL_q7_all	0.0326769	0.0183802	0.0754316	1
LIN52	Cross-ancestry	Brain_Anterior_cingulate_cortex_BA24	moco_RNFL_q9_all	0.0460654	0.0192082	0.0164754	1
LIN52	Cross-ancestry	Brain_Caudate_basal_ganglia	auto_GCC_q0_all	-0.0149557	0.0195093	0.443323	1
LIN52	Cross-ancestry	Brain_Caudate_basal_ganglia	auto_GCC_q10_all	-0.00696214	0.0191394	0.716037	1
LIN52	Cross-ancestry	Brain_Caudate_basal_ganglia	auto_GCC_q2_all	-0.000773571	0.0193655	0.968136	1
LIN52	Cross-ancestry	Brain_Caudate_basal_ganglia	auto_GCC_q3_all	-0.00670428	0.0196513	0.732982	1
LIN52	Cross-ancestry	Brain_Caudate_basal_ganglia	auto_GCC_q4_all	0.00489928	0.0193806	0.800428	1
LIN52	Cross-ancestry	Brain_Caudate_basal_ganglia	auto_GCC_q6_all	-0.00979856	0.0196838	0.618627	1
LIN52	Cross-ancestry	Brain_Caudate_basal_ganglia	auto_GCC_q8_all	0.00309428	0.0196287	0.87474	1
LIN52	Cross-ancestry	Brain_Caudate_basal_ganglia	auto_RNFL_q0_all	0.0443514	0.0205984	0.0313072	1
LIN52	Cross-ancestry	Brain_Caudate_basal_ganglia	auto_RNFL_q1_all	-0.0363578	0.0202022	0.0719087	1
LIN52	Cross-ancestry	Brain_Caudate_basal_ganglia	auto_RNFL_q3_all	-0.0131507	0.0197327	0.505129	1
LIN52	Cross-ancestry	Brain_Caudate_basal_ganglia	auto_RNFL_q4_all	-0.0500242	0.0209215	0.0168005	1
LIN52	Cross-ancestry	Brain_Caudate_basal_ganglia	auto_RNFL_q6_all	-0.0185657	0.0195868	0.343197	1
LIN52	Cross-ancestry	Brain_Caudate_basal_ganglia	auto_RNFL_q7_all	-0.0193393	0.01986	0.330165	1
LIN52	Cross-ancestry	Brain_Caudate_basal_ganglia	auto_RNFL_q8_all	0.00206286	0.0196253	0.916287	1
LIN52	Cross-ancestry	Brain_Caudate_basal_ganglia	moco_GCC_q3_all	0.0185657	0.0198415	0.349427	1
LIN52	Cross-ancestry	Brain_Caudate_basal_ganglia	moco_GCC_q8_all	-0.0118614	0.0197122	0.547355	1
LIN52	Cross-ancestry	Brain_Caudate_basal_ganglia	moco_RNFL_q1_all	-0.0495085	0.0208907	0.0177939	1
LIN52	Cross-ancestry	Brain_Caudate_basal_ganglia	moco_RNFL_q3_all	-0.00747785	0.0196583	0.703655	1
LIN52	Cross-ancestry	Brain_Caudate_basal_ganglia	moco_RNFL_q5_all	0.0177921	0.0198237	0.369443	1
LIN52	Cross-ancestry	Brain_Caudate_basal_ganglia	moco_RNFL_q7_all	-0.0239807	0.0199864	0.230198	1
LIN52	Cross-ancestry	Brain_Caudate_basal_ganglia	moco_RNFL_q9_all	-0.0435778	0.0207998	0.0361611	1
LIN52	Cross-ancestry	Brain_Cerebellar_Hemisphere	auto_GCC_q0_all	-0.0369673	0.0150309	0.0139164	1
LIN52	Cross-ancestry	Brain_Cerebellar_Hemisphere	auto_GCC_q10_all	-0.000140028	0.0140385	0.992042	1
LIN52	Cross-ancestry	Brain_Cerebellar_Hemisphere	auto_GCC_q2_all	0.00420083	0.014329	0.769393	1
LIN52	Cross-ancestry	Brain_Cerebellar_Hemisphere	auto_GCC_q3_all	-0.0442488	0.0155142	0.00434242	1
LIN52	Cross-ancestry	Brain_Cerebellar_Hemisphere	auto_GCC_q4_all	0.0417283	0.0152564	0.00623564	1
LIN52	Cross-ancestry	Brain_Cerebellar_Hemisphere	auto_GCC_q6_all	-0.00294058	0.0144629	0.838886	1
LIN52	Cross-ancestry	Brain_Cerebellar_Hemisphere	auto_GCC_q8_all	0.0385076	0.0152325	0.0114717	1
LIN52	Cross-ancestry	Brain_Cerebellar_Hemisphere	auto_RNFL_q0_all	0.0284256	0.0146884	0.0529596	1
LIN52	Cross-ancestry	Brain_Cerebellar_Hemisphere	auto_RNFL_q1_all	-0.045229	0.0154372	0.00339109	1
LIN52	Cross-ancestry	Brain_Cerebellar_Hemisphere	auto_RNFL_q3_all	0.0210042	0.0144589	0.146313	1
LIN52	Cross-ancestry	Brain_Cerebellar_Hemisphere	auto_RNFL_q4_all	-0.0478895	0.0155828	0.00211757	1
LIN52	Cross-ancestry	Brain_Cerebellar_Hemisphere	auto_RNFL_q6_all	-0.0448089	0.0155434	0.00394138	1
LIN52	Cross-ancestry	Brain_Cerebellar_Hemisphere	auto_RNFL_q7_all	0.010082	0.0143824	0.483304	1
LIN52	Cross-ancestry	Brain_Cerebellar_Hemisphere	auto_RNFL_q8_all	0.025205	0.0147166	0.0867702	1
LIN52	Cross-ancestry	Brain_Cerebellar_Hemisphere	moco_GCC_q3_all	0.025065	0.0147123	0.0884415	1
LIN52	Cross-ancestry	Brain_Cerebellar_Hemisphere	moco_GCC_q8_all	-0.0207241	0.0145886	0.155443	1
LIN52	Cross-ancestry	Brain_Cerebellar_Hemisphere	moco_RNFL_q1_all	-0.0341668	0.0149097	0.0219295	1
LIN52	Cross-ancestry	Brain_Cerebellar_Hemisphere	moco_RNFL_q3_all	0.0383676	0.0152261	0.0117399	1
LIN52	Cross-ancestry	Brain_Cerebellar_Hemisphere	moco_RNFL_q5_all	0.0439687	0.0154996	0.00455744	1
LIN52	Cross-ancestry	Brain_Cerebellar_Hemisphere	moco_RNFL_q7_all	-0.0341668	0.0150426	0.0231263	1
LIN52	Cross-ancestry	Brain_Cerebellar_Hemisphere	moco_RNFL_q9_all	-0.0141428	0.0144446	0.327526	1
LIN52	Cross-ancestry	Brain_Cortex	auto_GCC_q0_all	-0.015235	0.0195423	0.435631	1
LIN52	Cross-ancestry	Brain_Cortex	auto_GCC_q10_all	0.0103288	0.0192045	0.590691	1
LIN52	Cross-ancestry	Brain_Cortex	auto_GCC_q2_all	0.0142021	0.0195227	0.46694	1
LIN52	Cross-ancestry	Brain_Cortex	auto_GCC_q3_all	-0.0121364	0.0197443	0.538768	1
LIN52	Cross-ancestry	Brain_Cortex	auto_GCC_q4_all	0.0183337	0.0196091	0.349811	1
LIN52	Cross-ancestry	Brain_Cortex	auto_GCC_q6_all	-0.0185919	0.0198702	0.349446	1
LIN52	Cross-ancestry	Brain_Cortex	auto_GCC_q8_all	0.0113617	0.0197327	0.564763	1
LIN52	Cross-ancestry	Brain_Cortex	auto_RNFL_q0_all	0.0521605	0.0210832	0.0133599	1
LIN52	Cross-ancestry	Brain_Cortex	auto_RNFL_q1_all	-0.0498365	0.0207028	0.0160736	1
LIN52	Cross-ancestry	Brain_Cortex	auto_RNFL_q3_all	-0.0116199	0.0194797	0.550832	1
LIN52	Cross-ancestry	Brain_Cortex	auto_RNFL_q4_all	-0.0596489	0.0213455	0.00519878	1
LIN52	Cross-ancestry	Brain_Cortex	auto_RNFL_q6_all	-0.0201412	0.0196537	0.305455	1
LIN52	Cross-ancestry	Brain_Cortex	auto_RNFL_q7_all	-0.0149768	0.0197933	0.449253	1
LIN52	Cross-ancestry	Brain_Cortex	auto_RNFL_q8_all	0.00438975	0.0196625	0.823338	1
LIN52	Cross-ancestry	Brain_Cortex	moco_GCC_q3_all	0.0229816	0.0199854	0.250177	1
LIN52	Cross-ancestry	Brain_Cortex	moco_GCC_q8_all	-0.0103288	0.0197184	0.600406	1
LIN52	Cross-ancestry	Brain_Cortex	moco_RNFL_q1_all	-0.0397659	0.0203922	0.0511692	1
LIN52	Cross-ancestry	Brain_Cortex	moco_RNFL_q3_all	0.00852127	0.0196966	0.665287	1
LIN52	Cross-ancestry	Brain_Cortex	moco_RNFL_q5_all	0.0211741	0.0199351	0.288168	1
LIN52	Cross-ancestry	Brain_Cortex	moco_RNFL_q7_all	-0.0296954	0.0202068	0.141677	1
LIN52	Cross-ancestry	Brain_Cortex	moco_RNFL_q9_all	-0.0377002	0.0205398	0.0664363	1
LIN52	Cross-ancestry	Brain_Frontal_Cortex_BA9	auto_GCC_q0_all	0.0200646	0.0181788	0.269708	1
LIN52	Cross-ancestry	Brain_Frontal_Cortex_BA9	auto_GCC_q10_all	0.00330476	0.0177381	0.852203	1
LIN52	Cross-ancestry	Brain_Frontal_Cortex_BA9	auto_GCC_q2_all	0.00236054	0.0179709	0.895496	1
LIN52	Cross-ancestry	Brain_Frontal_Cortex_BA9	auto_GCC_q3_all	0.0151075	0.018322	0.409624	1
LIN52	Cross-ancestry	Brain_Frontal_Cortex_BA9	auto_GCC_q4_all	-0.0151075	0.0180878	0.403589	1
LIN52	Cross-ancestry	Brain_Frontal_Cortex_BA9	auto_GCC_q6_all	0.00401293	0.0182121	0.825603	1
LIN52	Cross-ancestry	Brain_Frontal_Cortex_BA9	auto_GCC_q8_all	-0.0110946	0.0182676	0.543628	1
LIN52	Cross-ancestry	Brain_Frontal_Cortex_BA9	auto_RNFL_q0_all	-0.043434	0.0189358	0.0218047	1
LIN52	Cross-ancestry	Brain_Frontal_Cortex_BA9	auto_RNFL_q1_all	0.0448504	0.0189982	0.0182371	1
LIN52	Cross-ancestry	Brain_Frontal_Cortex_BA9	auto_RNFL_q3_all	0.00118027	0.0182044	0.948306	1
LIN52	Cross-ancestry	Brain_Frontal_Cortex_BA9	auto_RNFL_q4_all	0.052168	0.0193487	0.00701348	1
LIN52	Cross-ancestry	Brain_Frontal_Cortex_BA9	auto_RNFL_q6_all	0.0266742	0.018339	0.145807	1
LIN52	Cross-ancestry	Brain_Frontal_Cortex_BA9	auto_RNFL_q7_all	0.0169959	0.0183533	0.354424	1
LIN52	Cross-ancestry	Brain_Frontal_Cortex_BA9	auto_RNFL_q8_all	0.00141633	0.0182047	0.937987	1
LIN52	Cross-ancestry	Brain_Frontal_Cortex_BA9	moco_GCC_q3_all	-0.0226612	0.0184688	0.219822	1
LIN52	Cross-ancestry	Brain_Frontal_Cortex_BA9	moco_GCC_q8_all	0.0051932	0.0182177	0.775596	1
LIN52	Cross-ancestry	Brain_Frontal_Cortex_BA9	moco_RNFL_q1_all	0.0502796	0.0192538	0.00901699	1
LIN52	Cross-ancestry	Brain_Frontal_Cortex_BA9	moco_RNFL_q3_all	0.00330476	0.0182094	0.855985	1
LIN52	Cross-ancestry	Brain_Frontal_Cortex_BA9	moco_RNFL_q5_all	-0.0224252	0.0184633	0.224527	1
LIN52	Cross-ancestry	Brain_Frontal_Cortex_BA9	moco_RNFL_q7_all	0.0339918	0.0187949	0.0705185	1
LIN52	Cross-ancestry	Brain_Frontal_Cortex_BA9	moco_RNFL_q9_all	0.0479191	0.019361	0.0133223	1
LIN52	Cross-ancestry	Brain_Hypothalamus	auto_GCC_q0_all	0.0353613	0.0322592	0.273008	1
LIN52	Cross-ancestry	Brain_Hypothalamus	auto_GCC_q10_all	0.00582421	0.0312345	0.852079	1
LIN52	Cross-ancestry	Brain_Hypothalamus	auto_GCC_q2_all	0.00416015	0.0316417	0.895398	1
LIN52	Cross-ancestry	Brain_Hypothalamus	auto_GCC_q3_all	0.026625	0.0324007	0.411225	1
LIN52	Cross-ancestry	Brain_Hypothalamus	auto_GCC_q4_all	-0.026625	0.0319895	0.405237	1
LIN52	Cross-ancestry	Brain_Hypothalamus	auto_GCC_q6_all	0.00707225	0.0320737	0.825482	1
LIN52	Cross-ancestry	Brain_Hypothalamus	auto_GCC_q8_all	-0.0195527	0.032239	0.544188	1
LIN52	Cross-ancestry	Brain_Hypothalamus	auto_RNFL_q0_all	-0.0765467	0.0344693	0.0263696	1
LIN52	Cross-ancestry	Brain_Hypothalamus	auto_RNFL_q1_all	0.0790428	0.034649	0.0225342	1
LIN52	Cross-ancestry	Brain_Hypothalamus	auto_RNFL_q3_all	0.00208007	0.0320509	0.948254	1
LIN52	Cross-ancestry	Brain_Hypothalamus	auto_RNFL_q4_all	0.0919393	0.0356527	0.00991587	1
LIN52	Cross-ancestry	Brain_Hypothalamus	auto_RNFL_q6_all	0.0470097	0.0327316	0.15094	1
LIN52	Cross-ancestry	Brain_Hypothalamus	auto_RNFL_q7_all	0.0299531	0.0324935	0.356624	1
LIN52	Cross-ancestry	Brain_Hypothalamus	auto_RNFL_q8_all	0.00249609	0.0320519	0.937926	1
LIN52	Cross-ancestry	Brain_Hypothalamus	moco_GCC_q3_all	-0.0399374	0.0328353	0.223873	1
LIN52	Cross-ancestry	Brain_Hypothalamus	moco_GCC_q8_all	0.00915233	0.0320905	0.775488	1
LIN52	Cross-ancestry	Brain_Hypothalamus	moco_RNFL_q1_all	0.0886112	0.035382	0.0122654	1
LIN52	Cross-ancestry	Brain_Hypothalamus	moco_RNFL_q3_all	0.00582421	0.0320657	0.85587	1
LIN52	Cross-ancestry	Brain_Hypothalamus	moco_RNFL_q5_all	-0.0395214	0.0328192	0.228506	1
LIN52	Cross-ancestry	Brain_Hypothalamus	moco_RNFL_q7_all	0.0599061	0.0337928	0.0762704	1
LIN52	Cross-ancestry	Brain_Hypothalamus	moco_RNFL_q9_all	0.084451	0.0354306	0.017146	1
LIN52	Cross-ancestry	Cells_Cultured_fibroblasts	auto_GCC_q0_all	0.0399216	0.0349495	0.253344	1
LIN52	Cross-ancestry	Cells_Cultured_fibroblasts	auto_GCC_q10_all	0.00408289	0.0340437	0.904538	1
LIN52	Cross-ancestry	Cells_Cultured_fibroblasts	auto_GCC_q2_all	0.00635116	0.0345039	0.853958	1
LIN52	Cross-ancestry	Cells_Cultured_fibroblasts	auto_GCC_q3_all	0.0322095	0.0347906	0.354545	1
LIN52	Cross-ancestry	Cells_Cultured_fibroblasts	auto_GCC_q4_all	-0.0331168	0.0348076	0.341389	1
LIN52	Cross-ancestry	Cells_Cultured_fibroblasts	auto_GCC_q6_all	0.00181462	0.0344932	0.958044	1
LIN52	Cross-ancestry	Cells_Cultured_fibroblasts	auto_GCC_q8_all	-0.0240437	0.0346588	0.487854	1
LIN52	Cross-ancestry	Cells_Cultured_fibroblasts	auto_RNFL_q0_all	-0.0875553	0.0366394	0.0168646	1
LIN52	Cross-ancestry	Cells_Cultured_fibroblasts	auto_RNFL_q1_all	0.0907309	0.0363683	0.0126035	1
LIN52	Cross-ancestry	Cells_Cultured_fibroblasts	auto_RNFL_q3_all	0.000453655	0.0344923	0.989506	1
LIN52	Cross-ancestry	Cells_Cultured_fibroblasts	auto_RNFL_q4_all	0.10298	0.0370125	0.00539763	1
LIN52	Cross-ancestry	Cells_Cultured_fibroblasts	auto_RNFL_q6_all	0.0562532	0.0353944	0.111987	1
LIN52	Cross-ancestry	Cells_Cultured_fibroblasts	auto_RNFL_q7_all	0.0340241	0.0352742	0.334765	1
LIN52	Cross-ancestry	Cells_Cultured_fibroblasts	auto_RNFL_q8_all	0.00317558	0.0344952	0.926651	1
LIN52	Cross-ancestry	Cells_Cultured_fibroblasts	moco_GCC_q3_all	-0.048541	0.0356111	0.172854	1
LIN52	Cross-ancestry	Cells_Cultured_fibroblasts	moco_GCC_q8_all	0.00725847	0.0349607	0.835527	1
LIN52	Cross-ancestry	Cells_Cultured_fibroblasts	moco_RNFL_q1_all	0.100258	0.0372824	0.00716364	1
LIN52	Cross-ancestry	Cells_Cultured_fibroblasts	moco_RNFL_q3_all	0.00635116	0.0349572	0.855831	1
LIN52	Cross-ancestry	Cells_Cultured_fibroblasts	moco_RNFL_q5_all	-0.0480874	0.0351538	0.171338	1
LIN52	Cross-ancestry	Cells_Cultured_fibroblasts	moco_RNFL_q7_all	0.0703165	0.0363279	0.0529158	1
LIN52	Cross-ancestry	Cells_Cultured_fibroblasts	moco_RNFL_q9_all	0.0984431	0.037186	0.00811331	1
SLC25A16	EUR	retina	auto_GCC_q0_EUR	0.015514	0.0518692	0.764866	3
SLC25A16	EUR	retina	auto_GCC_q10_EUR	-0.126884	0.0524345	0.0155271	3
SLC25A16	EUR	retina	auto_GCC_q2_EUR	-0.0979562	0.0526224	0.0626747	3
SLC25A16	EUR	retina	auto_GCC_q3_EUR	0.0612107	0.0538361	0.255546	3
SLC25A16	EUR	retina	auto_GCC_q4_EUR	-0.107003	0.0533984	0.0450851	3
SLC25A16	EUR	retina	auto_GCC_q6_EUR	0.0203841	0.0534133	0.702736	3
SLC25A16	EUR	retina	auto_GCC_q8_EUR	-0.0559606	0.0534451	0.295068	3
SLC25A16	EUR	retina	auto_RNFL_q0_EUR	0.0208708	0.0538069	0.698102	3
SLC25A16	EUR	retina	auto_RNFL_q1_EUR	0.0550887	0.0524008	0.293123	3
SLC25A16	EUR	retina	auto_RNFL_q3_EUR	-0.110408	0.0567024	0.0515177	3
SLC25A16	EUR	retina	auto_RNFL_q4_EUR	0.097407	0.0526334	0.064217	3
SLC25A16	EUR	retina	auto_RNFL_q6_EUR	0.170374	0.0581865	0.00341073	3
SLC25A16	EUR	retina	auto_RNFL_q7_EUR	0.0487593	0.0524354	0.352427	3
SLC25A16	EUR	retina	auto_RNFL_q8_EUR	-0.0737067	0.053502	0.168313	3
SLC25A16	EUR	retina	moco_GCC_q3_EUR	-0.125808	0.0531663	0.0179661	3
SLC25A16	EUR	retina	moco_GCC_q8_EUR	-0.0504213	0.0523852	0.335793	3
SLC25A16	EUR	retina	moco_RNFL_q1_EUR	0.0964266	0.0534142	0.071034	3
SLC25A16	EUR	retina	moco_RNFL_q3_EUR	-0.0241855	0.0527792	0.64678	3
SLC25A16	EUR	retina	moco_RNFL_q5_EUR	-0.0746117	0.0528844	0.15829	3
SLC25A16	EUR	retina	moco_RNFL_q7_EUR	0.156396	0.0601122	0.00927531	3
SLC25A16	EUR	retina	moco_RNFL_q9_EUR	0.0928558	0.0543456	0.0875219	3
SLC25A16	EUR	Artery_Aorta	auto_GCC_q0_EUR	-0.012468	0.0288596	0.665724	1
SLC25A16	EUR	Artery_Aorta	auto_GCC_q10_EUR	-0.0898558	0.0306764	0.00339892	1
SLC25A16	EUR	Artery_Aorta	auto_GCC_q2_EUR	-0.0840517	0.0306543	0.00610807	1
SLC25A16	EUR	Artery_Aorta	auto_GCC_q3_EUR	0.00967347	0.0292743	0.741066	1
SLC25A16	EUR	Artery_Aorta	auto_GCC_q4_EUR	-0.0655646	0.029824	0.0279218	1
SLC25A16	EUR	Artery_Aorta	auto_GCC_q6_EUR	0.0277306	0.029645	0.349571	1
SLC25A16	EUR	Artery_Aorta	auto_GCC_q8_EUR	-0.0367592	0.0293537	0.210467	1
SLC25A16	EUR	Artery_Aorta	auto_RNFL_q0_EUR	-0.0111782	0.029067	0.700558	1
SLC25A16	EUR	Artery_Aorta	auto_RNFL_q1_EUR	0.0518068	0.0296622	0.0807137	1
SLC25A16	EUR	Artery_Aorta	auto_RNFL_q3_EUR	-0.0599755	0.0296629	0.0431864	1
SLC25A16	EUR	Artery_Aorta	auto_RNFL_q4_EUR	0.0647047	0.0300062	0.0310541	1
SLC25A16	EUR	Artery_Aorta	auto_RNFL_q6_EUR	0.0825469	0.0305984	0.00698088	1
SLC25A16	EUR	Artery_Aorta	auto_RNFL_q7_EUR	0.0135429	0.0290807	0.641431	1
SLC25A16	EUR	Artery_Aorta	auto_RNFL_q8_EUR	-0.0427782	0.0294649	0.146547	1
SLC25A16	EUR	Artery_Aorta	moco_GCC_q3_EUR	-0.0655646	0.0300317	0.0290225	1
SLC25A16	EUR	Artery_Aorta	moco_GCC_q8_EUR	-0.012468	0.0290742	0.668043	1
SLC25A16	EUR	Artery_Aorta	moco_RNFL_q1_EUR	0.0509469	0.0294314	0.0834448	1
SLC25A16	EUR	Artery_Aorta	moco_RNFL_q3_EUR	-0.0176272	0.0293249	0.547773	1
SLC25A16	EUR	Artery_Aorta	moco_RNFL_q5_EUR	-0.0339646	0.0295206	0.249921	1
SLC25A16	EUR	Artery_Aorta	moco_RNFL_q7_EUR	0.0537415	0.0299192	0.0724593	1
SLC25A16	EUR	Artery_Aorta	moco_RNFL_q9_EUR	0.0462177	0.0293246	0.115009	1
SLC25A16	EUR	Artery_Tibial	auto_GCC_q0_EUR	0.00949782	0.0483852	0.844379	1
SLC25A16	EUR	Artery_Tibial	auto_GCC_q10_EUR	-0.103181	0.0509317	0.0427782	1
SLC25A16	EUR	Artery_Tibial	auto_GCC_q2_EUR	-0.0802998	0.0503527	0.110769	1
SLC25A16	EUR	Artery_Tibial	auto_GCC_q3_EUR	0.0431719	0.0496776	0.384824	1
SLC25A16	EUR	Artery_Tibial	auto_GCC_q4_EUR	-0.0798681	0.0499179	0.109601	1
SLC25A16	EUR	Artery_Tibial	auto_GCC_q6_EUR	0.00777095	0.0496724	0.875683	1
SLC25A16	EUR	Artery_Tibial	auto_GCC_q8_EUR	-0.035401	0.0495302	0.474773	1
SLC25A16	EUR	Artery_Tibial	auto_RNFL_q0_EUR	0.000431719	0.0487946	0.992941	1
SLC25A16	EUR	Artery_Tibial	auto_RNFL_q1_EUR	0.0410133	0.0492057	0.404559	1
SLC25A16	EUR	Artery_Tibial	auto_RNFL_q3_EUR	-0.0669165	0.0494596	0.176071	1
SLC25A16	EUR	Artery_Tibial	auto_RNFL_q4_EUR	0.0820267	0.0504193	0.10376	1
SLC25A16	EUR	Artery_Tibial	auto_RNFL_q6_EUR	0.112247	0.0517954	0.0302255	1
SLC25A16	EUR	Artery_Tibial	auto_RNFL_q7_EUR	0.0436036	0.0496867	0.380176	1
SLC25A16	EUR	Artery_Tibial	auto_RNFL_q8_EUR	-0.0496477	0.049396	0.31485	1
SLC25A16	EUR	Artery_Tibial	moco_GCC_q3_EUR	-0.101454	0.0512592	0.0477895	1
SLC25A16	EUR	Artery_Tibial	moco_GCC_q8_EUR	-0.0418768	0.0492232	0.394906	1
SLC25A16	EUR	Artery_Tibial	moco_RNFL_q1_EUR	0.0656213	0.0498405	0.187964	1
SLC25A16	EUR	Artery_Tibial	moco_RNFL_q3_EUR	-0.0220177	0.049344	0.655447	1
SLC25A16	EUR	Artery_Tibial	moco_RNFL_q5_EUR	-0.0531015	0.0499076	0.287331	1
SLC25A16	EUR	Artery_Tibial	moco_RNFL_q7_EUR	0.0945465	0.0513554	0.0656181	1
SLC25A16	EUR	Artery_Tibial	moco_RNFL_q9_EUR	0.063031	0.0497603	0.205265	1
SLC25A16	EUR	Brain_Anterior_cingulate_cortex_BA24	auto_GCC_q0_EUR	0.00511336	0.0179966	0.776311	1
SLC25A16	EUR	Brain_Anterior_cingulate_cortex_BA24	auto_GCC_q10_EUR	-0.0491753	0.01944	0.0114195	1
SLC25A16	EUR	Brain_Anterior_cingulate_cortex_BA24	auto_GCC_q2_EUR	-0.0548327	0.0199994	0.00611198	1
SLC25A16	EUR	Brain_Anterior_cingulate_cortex_BA24	auto_GCC_q3_EUR	0.0162105	0.0183703	0.377546	1
SLC25A16	EUR	Brain_Anterior_cingulate_cortex_BA24	auto_GCC_q4_EUR	-0.0455851	0.019328	0.0183486	1
SLC25A16	EUR	Brain_Anterior_cingulate_cortex_BA24	auto_GCC_q6_EUR	0.0250228	0.0187145	0.181196	1
SLC25A16	EUR	Brain_Anterior_cingulate_cortex_BA24	auto_GCC_q8_EUR	-0.0367727	0.0190749	0.0538794	1
SLC25A16	EUR	Brain_Anterior_cingulate_cortex_BA24	auto_RNFL_q0_EUR	-0.00728926	0.0181232	0.687532	1
SLC25A16	EUR	Brain_Anterior_cingulate_cortex_BA24	auto_RNFL_q1_EUR	0.0366639	0.0189662	0.0532218	1
SLC25A16	EUR	Brain_Anterior_cingulate_cortex_BA24	auto_RNFL_q3_EUR	-0.0439532	0.0191347	0.0216165	1
SLC25A16	EUR	Brain_Anterior_cingulate_cortex_BA24	auto_RNFL_q4_EUR	0.0360111	0.0189359	0.0572053	1
SLC25A16	EUR	Brain_Anterior_cingulate_cortex_BA24	auto_RNFL_q6_EUR	0.0437356	0.0193258	0.0236316	1
SLC25A16	EUR	Brain_Anterior_cingulate_cortex_BA24	auto_RNFL_q7_EUR	-0.00935637	0.0182544	0.608264	1
SLC25A16	EUR	Brain_Anterior_cingulate_cortex_BA24	auto_RNFL_q8_EUR	-0.0291571	0.0186481	0.117925	1
SLC25A16	EUR	Brain_Anterior_cingulate_cortex_BA24	moco_GCC_q3_EUR	-0.0275251	0.0185879	0.138658	1
SLC25A16	EUR	Brain_Anterior_cingulate_cortex_BA24	moco_GCC_q8_EUR	0.00718047	0.0181221	0.691938	1
SLC25A16	EUR	Brain_Anterior_cingulate_cortex_BA24	moco_RNFL_q1_EUR	0.0258932	0.018531	0.162327	1
SLC25A16	EUR	Brain_Anterior_cingulate_cortex_BA24	moco_RNFL_q3_EUR	-0.0204535	0.0184726	0.268192	1
SLC25A16	EUR	Brain_Anterior_cingulate_cortex_BA24	moco_RNFL_q5_EUR	-0.0271987	0.0186821	0.145427	1
SLC25A16	EUR	Brain_Anterior_cingulate_cortex_BA24	moco_RNFL_q7_EUR	0.035576	0.0190199	0.0614196	1
SLC25A16	EUR	Brain_Anterior_cingulate_cortex_BA24	moco_RNFL_q9_EUR	0.0256756	0.0184177	0.163295	1
SLC25A16	EUR	Brain_Caudate_basal_ganglia	auto_GCC_q0_EUR	0.00690892	0.0141283	0.624833	1
SLC25A16	EUR	Brain_Caudate_basal_ganglia	auto_GCC_q10_EUR	-0.0433727	0.0148435	0.00347789	1
SLC25A16	EUR	Brain_Caudate_basal_ganglia	auto_GCC_q2_EUR	-0.0545037	0.0153707	0.000391202	1
SLC25A16	EUR	Brain_Caudate_basal_ganglia	auto_GCC_q3_EUR	0.0143296	0.0143181	0.316921	1
SLC25A16	EUR	Brain_Caudate_basal_ganglia	auto_GCC_q4_EUR	-0.0447801	0.0148906	0.00263611	1
SLC25A16	EUR	Brain_Caudate_basal_ganglia	auto_GCC_q6_EUR	0.0221341	0.0145559	0.128353	1
SLC25A16	EUR	Brain_Caudate_basal_ganglia	auto_GCC_q8_EUR	-0.031474	0.0146247	0.0313888	1
SLC25A16	EUR	Brain_Caudate_basal_ganglia	auto_RNFL_q0_EUR	0.00524566	0.0142478	0.712743	1
SLC25A16	EUR	Brain_Caudate_basal_ganglia	auto_RNFL_q1_EUR	0.0365917	0.0146356	0.0124129	1
SLC25A16	EUR	Brain_Caudate_basal_ganglia	auto_RNFL_q3_EUR	-0.0577023	0.0153849	0.000176435	1
SLC25A16	EUR	Brain_Caudate_basal_ganglia	auto_RNFL_q4_EUR	0.0423491	0.01481	0.00424326	1
SLC25A16	EUR	Brain_Caudate_basal_ganglia	auto_RNFL_q6_EUR	0.0713922	0.0160209	8.34262e-06	1
SLC25A16	EUR	Brain_Caudate_basal_ganglia	auto_RNFL_q7_EUR	0.000895601	0.0142372	0.949841	1
SLC25A16	EUR	Brain_Caudate_basal_ganglia	auto_RNFL_q8_EUR	-0.0376152	0.0147877	0.0109692	1
SLC25A16	EUR	Brain_Caudate_basal_ganglia	moco_GCC_q3_EUR	-0.0522007	0.0151613	0.000575224	1
SLC25A16	EUR	Brain_Caudate_basal_ganglia	moco_GCC_q8_EUR	-0.0194473	0.0143862	0.176436	1
SLC25A16	EUR	Brain_Caudate_basal_ganglia	moco_RNFL_q1_EUR	0.0455477	0.0149169	0.00226245	1
SLC25A16	EUR	Brain_Caudate_basal_ganglia	moco_RNFL_q3_EUR	-0.00985161	0.0142753	0.490121	1
SLC25A16	EUR	Brain_Caudate_basal_ganglia	moco_RNFL_q5_EUR	-0.0230297	0.0144458	0.110887	1
SLC25A16	EUR	Brain_Caudate_basal_ganglia	moco_RNFL_q7_EUR	0.0282754	0.0145507	0.0519878	1
SLC25A16	EUR	Brain_Caudate_basal_ganglia	moco_RNFL_q9_EUR	0.0409418	0.0147653	0.00555685	1
SLC25A16	EUR	Brain_Cerebellar_Hemisphere	auto_GCC_q0_EUR	-0.00313283	0.0131601	0.811839	1
SLC25A16	EUR	Brain_Cerebellar_Hemisphere	auto_GCC_q10_EUR	-0.0393562	0.0136735	0.00399846	1
SLC25A16	EUR	Brain_Cerebellar_Hemisphere	auto_GCC_q2_EUR	-0.0377898	0.0137281	0.00591008	1
SLC25A16	EUR	Brain_Cerebellar_Hemisphere	auto_GCC_q3_EUR	0.00665727	0.0133669	0.618454	1
SLC25A16	EUR	Brain_Cerebellar_Hemisphere	auto_GCC_q4_EUR	-0.0301535	0.0134625	0.0251031	1
SLC25A16	EUR	Brain_Cerebellar_Hemisphere	auto_GCC_q6_EUR	0.0139019	0.0135138	0.303611	1
SLC25A16	EUR	Brain_Cerebellar_Hemisphere	auto_GCC_q8_EUR	-0.0181117	0.0133647	0.175358	1
SLC25A16	EUR	Brain_Cerebellar_Hemisphere	auto_RNFL_q0_EUR	-0.00450345	0.0132613	0.734162	1
SLC25A16	EUR	Brain_Cerebellar_Hemisphere	auto_RNFL_q1_EUR	0.0232025	0.013435	0.0841627	1
SLC25A16	EUR	Brain_Cerebellar_Hemisphere	auto_RNFL_q3_EUR	-0.0272165	0.0134064	0.042345	1
SLC25A16	EUR	Brain_Cerebellar_Hemisphere	auto_RNFL_q4_EUR	0.0307409	0.0135697	0.0234879	1
SLC25A16	EUR	Brain_Cerebellar_Hemisphere	auto_RNFL_q6_EUR	0.0379856	0.013733	0.00567455	1
SLC25A16	EUR	Brain_Cerebellar_Hemisphere	auto_RNFL_q7_EUR	0.00685307	0.0132703	0.605559	1
SLC25A16	EUR	Brain_Cerebellar_Hemisphere	auto_RNFL_q8_EUR	-0.0218319	0.0134144	0.103631	1
SLC25A16	EUR	Brain_Cerebellar_Hemisphere	moco_GCC_q3_EUR	-0.0309367	0.0135737	0.0226573	1
SLC25A16	EUR	Brain_Cerebellar_Hemisphere	moco_GCC_q8_EUR	-0.00186012	0.0132556	0.888401	1
SLC25A16	EUR	Brain_Cerebellar_Hemisphere	moco_RNFL_q1_EUR	0.0230067	0.0134319	0.0867423	1
SLC25A16	EUR	Brain_Cerebellar_Hemisphere	moco_RNFL_q3_EUR	-0.0093985	0.0133816	0.482465	1
SLC25A16	EUR	Brain_Cerebellar_Hemisphere	moco_RNFL_q5_EUR	-0.0162516	0.0134403	0.226598	1
SLC25A16	EUR	Brain_Cerebellar_Hemisphere	moco_RNFL_q7_EUR	0.026727	0.0135893	0.049211	1
SLC25A16	EUR	Brain_Cerebellar_Hemisphere	moco_RNFL_q9_EUR	0.0175243	0.0133577	0.189546	1
SLC25A16	EUR	Brain_Cerebellum	auto_GCC_q0_EUR	-0.00350046	0.0146964	0.811737	1
SLC25A16	EUR	Brain_Cerebellum	auto_GCC_q10_EUR	-0.0439746	0.0153304	0.00412475	1
SLC25A16	EUR	Brain_Cerebellum	auto_GCC_q2_EUR	-0.0422243	0.0153865	0.00606504	1
SLC25A16	EUR	Brain_Cerebellum	auto_GCC_q3_EUR	0.00743848	0.0149289	0.618301	1
SLC25A16	EUR	Brain_Cerebellum	auto_GCC_q4_EUR	-0.0336919	0.0150701	0.0253728	1
SLC25A16	EUR	Brain_Cerebellum	auto_GCC_q6_EUR	0.0155333	0.015099	0.303592	1
SLC25A16	EUR	Brain_Cerebellum	auto_GCC_q8_EUR	-0.020237	0.0149378	0.175497	1
SLC25A16	EUR	Brain_Cerebellum	auto_RNFL_q0_EUR	-0.00503191	0.0148099	0.734031	1
SLC25A16	EUR	Brain_Cerebellum	auto_RNFL_q1_EUR	0.0259253	0.0150246	0.0844342	1
SLC25A16	EUR	Brain_Cerebellum	auto_RNFL_q3_EUR	-0.0304103	0.0150008	0.0426377	1
SLC25A16	EUR	Brain_Cerebellum	auto_RNFL_q4_EUR	0.0343483	0.0151911	0.0237544	1
SLC25A16	EUR	Brain_Cerebellum	auto_RNFL_q6_EUR	0.0424431	0.0153925	0.0058264	1
SLC25A16	EUR	Brain_Cerebellum	auto_RNFL_q7_EUR	0.00765726	0.014821	0.605401	1
SLC25A16	EUR	Brain_Cerebellum	auto_RNFL_q8_EUR	-0.0243938	0.0149992	0.103877	1
SLC25A16	EUR	Brain_Cerebellum	moco_GCC_q3_EUR	-0.0345671	0.015196	0.0229213	1
SLC25A16	EUR	Brain_Cerebellum	moco_GCC_q8_EUR	-0.0020784	0.0148028	0.88834	1
SLC25A16	EUR	Brain_Cerebellum	moco_RNFL_q1_EUR	0.0257065	0.0150209	0.0870108	1
SLC25A16	EUR	Brain_Cerebellum	moco_RNFL_q3_EUR	-0.0105014	0.0149471	0.482324	1
SLC25A16	EUR	Brain_Cerebellum	moco_RNFL_q5_EUR	-0.0181586	0.0150197	0.226667	1
SLC25A16	EUR	Brain_Cerebellum	moco_RNFL_q7_EUR	0.0298633	0.0152039	0.0495087	1
SLC25A16	EUR	Brain_Cerebellum	moco_RNFL_q9_EUR	0.0195807	0.0149292	0.189663	1
SLC25A16	EUR	Brain_Cortex	auto_GCC_q0_EUR	0.00205444	0.0217679	0.924808	1
SLC25A16	EUR	Brain_Cortex	auto_GCC_q10_EUR	-0.0515323	0.0228588	0.0241728	1
SLC25A16	EUR	Brain_Cortex	auto_GCC_q2_EUR	-0.0494778	0.0230873	0.0321072	1
SLC25A16	EUR	Brain_Cortex	auto_GCC_q3_EUR	0.0140387	0.022202	0.52718	1
SLC25A16	EUR	Brain_Cortex	auto_GCC_q4_EUR	-0.0443417	0.0227014	0.0507891	1
SLC25A16	EUR	Brain_Cortex	auto_GCC_q6_EUR	0.0135251	0.0223656	0.545361	1
SLC25A16	EUR	Brain_Cortex	auto_GCC_q8_EUR	-0.0313303	0.0224053	0.16201	1
SLC25A16	EUR	Brain_Cortex	auto_RNFL_q0_EUR	-0.00599212	0.0219542	0.784901	1
SLC25A16	EUR	Brain_Cortex	auto_RNFL_q1_EUR	0.0374936	0.0226047	0.0971831	1
SLC25A16	EUR	Brain_Cortex	auto_RNFL_q3_EUR	-0.0477658	0.0228479	0.0365643	1
SLC25A16	EUR	Brain_Cortex	auto_RNFL_q4_EUR	0.0489642	0.0229015	0.0325142	1
SLC25A16	EUR	Brain_Cortex	auto_RNFL_q6_EUR	0.0614621	0.0236887	0.00947095	1
SLC25A16	EUR	Brain_Cortex	auto_RNFL_q7_EUR	0.0145523	0.0220388	0.509058	1
SLC25A16	EUR	Brain_Cortex	auto_RNFL_q8_EUR	-0.0267078	0.0222782	0.230595	1
SLC25A16	EUR	Brain_Cortex	moco_GCC_q3_EUR	-0.0419449	0.0227696	0.0654536	1
SLC25A16	EUR	Brain_Cortex	moco_GCC_q8_EUR	0	0.0219369	1	1
SLC25A16	EUR	Brain_Cortex	moco_RNFL_q1_EUR	0.046225	0.0227808	0.0424459	1
SLC25A16	EUR	Brain_Cortex	moco_RNFL_q3_EUR	-0.0106146	0.0221617	0.631966	1
SLC25A16	EUR	Brain_Cortex	moco_RNFL_q5_EUR	-0.0335559	0.0224733	0.1354	1
SLC25A16	EUR	Brain_Cortex	moco_RNFL_q7_EUR	0.0374936	0.0226047	0.0971831	1
SLC25A16	EUR	Brain_Cortex	moco_RNFL_q9_EUR	0.0434857	0.0226664	0.055046	1
SLC25A16	EUR	Brain_Frontal_Cortex_BA9	auto_GCC_q0_EUR	-0.0139396	0.0243398	0.566842	1
SLC25A16	EUR	Brain_Frontal_Cortex_BA9	auto_GCC_q10_EUR	-0.0754911	0.0258296	0.00347063	1
SLC25A16	EUR	Brain_Frontal_Cortex_BA9	auto_GCC_q2_EUR	-0.0691549	0.0259005	0.00758457	1
SLC25A16	EUR	Brain_Frontal_Cortex_BA9	auto_GCC_q3_EUR	0.00452585	0.0244664	0.853243	1
SLC25A16	EUR	Brain_Frontal_Cortex_BA9	auto_GCC_q4_EUR	-0.0515946	0.0250969	0.0398003	1
SLC25A16	EUR	Brain_Frontal_Cortex_BA9	auto_GCC_q6_EUR	0.0224482	0.0247955	0.365289	1
SLC25A16	EUR	Brain_Frontal_Cortex_BA9	auto_GCC_q8_EUR	-0.0262499	0.0246727	0.287364	1
SLC25A16	EUR	Brain_Frontal_Cortex_BA9	auto_RNFL_q0_EUR	-0.0101379	0.0244919	0.678926	1
SLC25A16	EUR	Brain_Frontal_Cortex_BA9	auto_RNFL_q1_EUR	0.0414567	0.0248102	0.0947305	1
SLC25A16	EUR	Brain_Frontal_Cortex_BA9	auto_RNFL_q3_EUR	-0.0459826	0.0247548	0.0632365	1
SLC25A16	EUR	Brain_Frontal_Cortex_BA9	auto_RNFL_q4_EUR	0.0517757	0.0251026	0.0391541	1
SLC25A16	EUR	Brain_Frontal_Cortex_BA9	auto_RNFL_q6_EUR	0.0651722	0.0257433	0.0113539	1
SLC25A16	EUR	Brain_Frontal_Cortex_BA9	auto_RNFL_q7_EUR	0.0114051	0.0245003	0.641567	1
SLC25A16	EUR	Brain_Frontal_Cortex_BA9	auto_RNFL_q8_EUR	-0.0338533	0.0248128	0.172458	1
SLC25A16	EUR	Brain_Frontal_Cortex_BA9	moco_GCC_q3_EUR	-0.0523188	0.0251196	0.037271	1
SLC25A16	EUR	Brain_Frontal_Cortex_BA9	moco_GCC_q8_EUR	-0.010681	0.0244954	0.662807	1
SLC25A16	EUR	Brain_Frontal_Cortex_BA9	moco_RNFL_q1_EUR	0.0385602	0.0247392	0.119076	1
SLC25A16	EUR	Brain_Frontal_Cortex_BA9	moco_RNFL_q3_EUR	-0.0137586	0.0245186	0.574697	1
SLC25A16	EUR	Brain_Frontal_Cortex_BA9	moco_RNFL_q5_EUR	-0.026612	0.0246786	0.280882	1
SLC25A16	EUR	Brain_Frontal_Cortex_BA9	moco_RNFL_q7_EUR	0.042905	0.0250243	0.0864306	1
SLC25A16	EUR	Brain_Frontal_Cortex_BA9	moco_RNFL_q9_EUR	0.0331292	0.0246196	0.178418	1
SLC25A16	EUR	Brain_Hypothalamus	auto_GCC_q0_EUR	-0.00963671	0.0168335	0.567002	1
SLC25A16	EUR	Brain_Hypothalamus	auto_GCC_q10_EUR	-0.0521884	0.0176336	0.00308035	1
SLC25A16	EUR	Brain_Hypothalamus	auto_GCC_q2_EUR	-0.0478081	0.0177215	0.00698101	1
SLC25A16	EUR	Brain_Hypothalamus	auto_GCC_q3_EUR	0.0031288	0.0169286	0.853367	1
SLC25A16	EUR	Brain_Hypothalamus	auto_GCC_q4_EUR	-0.0356683	0.0172512	0.038679	1
SLC25A16	EUR	Brain_Hypothalamus	auto_GCC_q6_EUR	0.0155189	0.0171351	0.365107	1
SLC25A16	EUR	Brain_Hypothalamus	auto_GCC_q8_EUR	-0.018147	0.0170421	0.286951	1
SLC25A16	EUR	Brain_Hypothalamus	auto_RNFL_q0_EUR	-0.00700852	0.0169426	0.679121	1
SLC25A16	EUR	Brain_Hypothalamus	auto_RNFL_q1_EUR	0.0286598	0.0170927	0.093596	1
SLC25A16	EUR	Brain_Hypothalamus	auto_RNFL_q3_EUR	-0.0317886	0.0170371	0.0620626	1
SLC25A16	EUR	Brain_Hypothalamus	auto_RNFL_q4_EUR	0.0357935	0.0172543	0.0380362	1
SLC25A16	EUR	Brain_Hypothalamus	auto_RNFL_q6_EUR	0.0450547	0.0176342	0.0106198	1
SLC25A16	EUR	Brain_Hypothalamus	auto_RNFL_q7_EUR	0.00788458	0.0169473	0.641758	1
SLC25A16	EUR	Brain_Hypothalamus	auto_RNFL_q8_EUR	-0.0234034	0.0171193	0.171601	1
SLC25A16	EUR	Brain_Hypothalamus	moco_GCC_q3_EUR	-0.0361689	0.0172638	0.0361641	1
SLC25A16	EUR	Brain_Hypothalamus	moco_GCC_q8_EUR	-0.00738397	0.0169445	0.663001	1
SLC25A16	EUR	Brain_Hypothalamus	moco_RNFL_q1_EUR	0.0266574	0.0170536	0.118016	1
SLC25A16	EUR	Brain_Hypothalamus	moco_RNFL_q3_EUR	-0.00951156	0.0169573	0.574858	1
SLC25A16	EUR	Brain_Hypothalamus	moco_RNFL_q5_EUR	-0.0183974	0.0170454	0.280447	1
SLC25A16	EUR	Brain_Hypothalamus	moco_RNFL_q7_EUR	0.029661	0.017236	0.085273	1
SLC25A16	EUR	Brain_Hypothalamus	moco_RNFL_q9_EUR	0.0229028	0.0169876	0.177591	1
SLC25A16	EUR	Brain_Nucleus_accumbens_basal_ganglia	auto_GCC_q0_EUR	-0.00846631	0.0172556	0.62368	1
SLC25A16	EUR	Brain_Nucleus_accumbens_basal_ganglia	auto_GCC_q10_EUR	-0.0528503	0.0184999	0.0042794	1
SLC25A16	EUR	Brain_Nucleus_accumbens_basal_ganglia	auto_GCC_q2_EUR	-0.0493868	0.0185662	0.0078132	1
SLC25A16	EUR	Brain_Nucleus_accumbens_basal_ganglia	auto_GCC_q3_EUR	0.00436143	0.0173562	0.80159	1
SLC25A16	EUR	Brain_Nucleus_accumbens_basal_ganglia	auto_GCC_q4_EUR	-0.0366874	0.0179065	0.0404792	1
SLC25A16	EUR	Brain_Nucleus_accumbens_basal_ganglia	auto_GCC_q6_EUR	0.0169326	0.0177481	0.340057	1
SLC25A16	EUR	Brain_Nucleus_accumbens_basal_ganglia	auto_GCC_q8_EUR	-0.0194982	0.017542	0.266348	1
SLC25A16	EUR	Brain_Nucleus_accumbens_basal_ganglia	auto_RNFL_q0_EUR	-0.00602904	0.0173651	0.728447	1
SLC25A16	EUR	Brain_Nucleus_accumbens_basal_ganglia	auto_RNFL_q1_EUR	0.0289907	0.0177761	0.102916	1
SLC25A16	EUR	Brain_Nucleus_accumbens_basal_ganglia	auto_RNFL_q3_EUR	-0.0336087	0.0176738	0.057222	1
SLC25A16	EUR	Brain_Nucleus_accumbens_basal_ganglia	auto_RNFL_q4_EUR	0.0364308	0.0178971	0.0417938	1
SLC25A16	EUR	Brain_Nucleus_accumbens_basal_ganglia	auto_RNFL_q6_EUR	0.0470778	0.0184582	0.0107563	1
SLC25A16	EUR	Brain_Nucleus_accumbens_basal_ganglia	auto_RNFL_q7_EUR	0.00782493	0.017378	0.65251	1
SLC25A16	EUR	Brain_Nucleus_accumbens_basal_ganglia	auto_RNFL_q8_EUR	-0.024501	0.0176544	0.165193	1
SLC25A16	EUR	Brain_Nucleus_accumbens_basal_ganglia	moco_GCC_q3_EUR	-0.0387398	0.017984	0.0312304	1
SLC25A16	EUR	Brain_Nucleus_accumbens_basal_ganglia	moco_GCC_q8_EUR	-0.00718354	0.017373	0.679249	1
SLC25A16	EUR	Brain_Nucleus_accumbens_basal_ganglia	moco_RNFL_q1_EUR	0.0270666	0.0175962	0.123999	1
SLC25A16	EUR	Brain_Nucleus_accumbens_basal_ganglia	moco_RNFL_q3_EUR	-0.0103905	0.0174021	0.550453	1
SLC25A16	EUR	Brain_Nucleus_accumbens_basal_ganglia	moco_RNFL_q5_EUR	-0.0180871	0.0175149	0.301757	1
SLC25A16	EUR	Brain_Nucleus_accumbens_basal_ganglia	moco_RNFL_q7_EUR	0.0301452	0.0178106	0.0905422	1
SLC25A16	EUR	Brain_Nucleus_accumbens_basal_ganglia	moco_RNFL_q9_EUR	0.0238596	0.0175127	0.173065	1
SLC25A16	EUR	Brain_Putamen_basal_ganglia	auto_GCC_q0_EUR	-0.00292515	0.0135572	0.829171	1
SLC25A16	EUR	Brain_Putamen_basal_ganglia	auto_GCC_q10_EUR	-0.0407504	0.0143084	0.0043993	1
SLC25A16	EUR	Brain_Putamen_basal_ganglia	auto_GCC_q2_EUR	-0.03954	0.0143609	0.00589951	1
SLC25A16	EUR	Brain_Putamen_basal_ganglia	auto_GCC_q3_EUR	0.00716158	0.013778	0.603213	1
SLC25A16	EUR	Brain_Putamen_basal_ganglia	auto_GCC_q4_EUR	-0.0317732	0.0140171	0.023406	1
SLC25A16	EUR	Brain_Putamen_basal_ganglia	auto_GCC_q6_EUR	0.0146258	0.0139524	0.294519	1
SLC25A16	EUR	Brain_Putamen_basal_ganglia	auto_GCC_q8_EUR	-0.0193665	0.0138267	0.161315	1
SLC25A16	EUR	Brain_Putamen_basal_ganglia	auto_RNFL_q0_EUR	-0.0046399	0.0136637	0.734175	1
SLC25A16	EUR	Brain_Putamen_basal_ganglia	auto_RNFL_q1_EUR	0.0239056	0.0139164	0.0858335	1
SLC25A16	EUR	Brain_Putamen_basal_ganglia	auto_RNFL_q3_EUR	-0.0278394	0.0139107	0.0453613	1
SLC25A16	EUR	Brain_Putamen_basal_ganglia	auto_RNFL_q4_EUR	0.031975	0.0141202	0.0235443	1
SLC25A16	EUR	Brain_Putamen_basal_ganglia	auto_RNFL_q6_EUR	0.0394391	0.0143574	0.00601498	1
SLC25A16	EUR	Brain_Putamen_basal_ganglia	auto_RNFL_q7_EUR	0.00796852	0.0136832	0.560325	1
SLC25A16	EUR	Brain_Putamen_basal_ganglia	auto_RNFL_q8_EUR	-0.0226952	0.0138907	0.102293	1
SLC25A16	EUR	Brain_Putamen_basal_ganglia	moco_GCC_q3_EUR	-0.0314706	0.0141058	0.0256787	1
SLC25A16	EUR	Brain_Putamen_basal_ganglia	moco_GCC_q8_EUR	-0.00191648	0.0136555	0.888387	1
SLC25A16	EUR	Brain_Putamen_basal_ganglia	moco_RNFL_q1_EUR	0.0239056	0.0138177	0.0836185	1
SLC25A16	EUR	Brain_Putamen_basal_ganglia	moco_RNFL_q3_EUR	-0.00917893	0.0137931	0.505749	1
SLC25A16	EUR	Brain_Putamen_basal_ganglia	moco_RNFL_q5_EUR	-0.0166431	0.0138814	0.230546	1
SLC25A16	EUR	Brain_Putamen_basal_ganglia	moco_RNFL_q7_EUR	0.0270325	0.0140869	0.0549876	1
SLC25A16	EUR	Brain_Putamen_basal_ganglia	moco_RNFL_q9_EUR	0.0180553	0.0137047	0.187688	1
SLC25A16	EUR	Brain_Spinal_cord_cervical_c-1	auto_GCC_q0_EUR	-0.0040228	0.0168911	0.811756	1
SLC25A16	EUR	Brain_Spinal_cord_cervical_c-1	auto_GCC_q10_EUR	-0.0505365	0.0192342	0.00860317	1
SLC25A16	EUR	Brain_Spinal_cord_cervical_c-1	auto_GCC_q2_EUR	-0.0485251	0.0191718	0.0113717	1
SLC25A16	EUR	Brain_Spinal_cord_cervical_c-1	auto_GCC_q3_EUR	0.00854846	0.0171971	0.619129	1
SLC25A16	EUR	Brain_Spinal_cord_cervical_c-1	auto_GCC_q4_EUR	-0.0387195	0.0182968	0.034329	1
SLC25A16	EUR	Brain_Spinal_cord_cervical_c-1	auto_GCC_q6_EUR	0.0178512	0.017557	0.309269	1
SLC25A16	EUR	Brain_Spinal_cord_cervical_c-1	auto_GCC_q8_EUR	-0.0232568	0.0175232	0.184441	1
SLC25A16	EUR	Brain_Spinal_cord_cervical_c-1	auto_RNFL_q0_EUR	-0.00578278	0.0170334	0.734236	1
SLC25A16	EUR	Brain_Spinal_cord_cervical_c-1	auto_RNFL_q1_EUR	0.0297939	0.0178502	0.0950957	1
SLC25A16	EUR	Brain_Spinal_cord_cervical_c-1	auto_RNFL_q3_EUR	-0.0349481	0.0180418	0.0527379	1
SLC25A16	EUR	Brain_Spinal_cord_cervical_c-1	auto_RNFL_q4_EUR	0.0394738	0.018466	0.0325453	1
SLC25A16	EUR	Brain_Spinal_cord_cervical_c-1	auto_RNFL_q6_EUR	0.0487765	0.0191931	0.0110423	1
SLC25A16	EUR	Brain_Spinal_cord_cervical_c-1	auto_RNFL_q7_EUR	0.00879988	0.0170764	0.606327	1
SLC25A16	EUR	Brain_Spinal_cord_cervical_c-1	auto_RNFL_q8_EUR	-0.0280339	0.0177548	0.114349	1
SLC25A16	EUR	Brain_Spinal_cord_cervical_c-1	moco_GCC_q3_EUR	-0.0397252	0.018484	0.0316208	1
SLC25A16	EUR	Brain_Spinal_cord_cervical_c-1	moco_GCC_q8_EUR	-0.00238854	0.0170062	0.888304	1
SLC25A16	EUR	Brain_Spinal_cord_cervical_c-1	moco_RNFL_q1_EUR	0.0295425	0.0178362	0.0976575	1
SLC25A16	EUR	Brain_Spinal_cord_cervical_c-1	moco_RNFL_q3_EUR	-0.0120684	0.0172674	0.484606	1
SLC25A16	EUR	Brain_Spinal_cord_cervical_c-1	moco_RNFL_q5_EUR	-0.0208683	0.0175451	0.234278	1
SLC25A16	EUR	Brain_Spinal_cord_cervical_c-1	moco_RNFL_q7_EUR	0.0343195	0.018237	0.0598549	1
SLC25A16	EUR	Brain_Spinal_cord_cervical_c-1	moco_RNFL_q9_EUR	0.0225026	0.0174903	0.198243	1
SLC25A16	EUR	Brain_Substantia_nigra	auto_GCC_q0_EUR	-0.00642416	0.0233101	0.782859	1
SLC25A16	EUR	Brain_Substantia_nigra	auto_GCC_q10_EUR	-0.0704921	0.025888	0.0064699	1
SLC25A16	EUR	Brain_Substantia_nigra	auto_GCC_q2_EUR	-0.0680613	0.0258772	0.00853433	1
SLC25A16	EUR	Brain_Substantia_nigra	auto_GCC_q3_EUR	0.0107648	0.0236973	0.64964	1
SLC25A16	EUR	Brain_Substantia_nigra	auto_GCC_q4_EUR	-0.0534768	0.0248173	0.0311764	1
SLC25A16	EUR	Brain_Substantia_nigra	auto_GCC_q6_EUR	0.0253494	0.0241526	0.293924	1
SLC25A16	EUR	Brain_Substantia_nigra	auto_GCC_q8_EUR	-0.0317735	0.0241777	0.18879	1
SLC25A16	EUR	Brain_Substantia_nigra	auto_RNFL_q0_EUR	-0.00833404	0.0234989	0.722847	1
SLC25A16	EUR	Brain_Substantia_nigra	auto_RNFL_q1_EUR	0.0409757	0.0243644	0.0926097	1
SLC25A16	EUR	Brain_Substantia_nigra	auto_RNFL_q3_EUR	-0.0475735	0.0245061	0.0522228	1
SLC25A16	EUR	Brain_Substantia_nigra	auto_RNFL_q4_EUR	0.055213	0.0250772	0.027685	1
SLC25A16	EUR	Brain_Substantia_nigra	auto_RNFL_q6_EUR	0.0678877	0.0258655	0.00867389	1
SLC25A16	EUR	Brain_Substantia_nigra	auto_RNFL_q7_EUR	0.0145846	0.0235772	0.536188	1
SLC25A16	EUR	Brain_Substantia_nigra	auto_RNFL_q8_EUR	-0.0376768	0.0242269	0.119907	1
SLC25A16	EUR	Brain_Substantia_nigra	moco_GCC_q3_EUR	-0.055213	0.0250772	0.027685	1
SLC25A16	EUR	Brain_Substantia_nigra	moco_GCC_q8_EUR	-0.00312527	0.0234662	0.89405	1
SLC25A16	EUR	Brain_Substantia_nigra	moco_RNFL_q1_EUR	0.0408021	0.0243569	0.0938991	1
SLC25A16	EUR	Brain_Substantia_nigra	moco_RNFL_q3_EUR	-0.0166681	0.0237851	0.483441	1
SLC25A16	EUR	Brain_Substantia_nigra	moco_RNFL_q5_EUR	-0.0281274	0.0240612	0.242406	1
SLC25A16	EUR	Brain_Substantia_nigra	moco_RNFL_q7_EUR	0.0472262	0.0248189	0.0570627	1
SLC25A16	EUR	Brain_Substantia_nigra	moco_RNFL_q9_EUR	0.032468	0.0240321	0.176686	1
SLC25A16	EUR	Cells_Cultured_fibroblasts	auto_GCC_q0_EUR	-0.0188144	0.0299822	0.530318	1
SLC25A16	EUR	Cells_Cultured_fibroblasts	auto_GCC_q10_EUR	-0.100135	0.0316758	0.00157102	1
SLC25A16	EUR	Cells_Cultured_fibroblasts	auto_GCC_q2_EUR	-0.0871736	0.0316073	0.00581521	1
SLC25A16	EUR	Cells_Cultured_fibroblasts	auto_GCC_q3_EUR	0.00794387	0.0303412	0.793462	1
SLC25A16	EUR	Cells_Cultured_fibroblasts	auto_GCC_q4_EUR	-0.0662686	0.030785	0.0313481	1
SLC25A16	EUR	Cells_Cultured_fibroblasts	auto_GCC_q6_EUR	0.0401375	0.0308547	0.193308	1
SLC25A16	EUR	Cells_Cultured_fibroblasts	auto_GCC_q8_EUR	-0.0351203	0.0303661	0.247451	1
SLC25A16	EUR	Cells_Cultured_fibroblasts	auto_RNFL_q0_EUR	-0.021323	0.0302108	0.480307	1
SLC25A16	EUR	Cells_Cultured_fibroblasts	auto_RNFL_q1_EUR	0.0562343	0.0307475	0.0674136	1
SLC25A16	EUR	Cells_Cultured_fibroblasts	auto_RNFL_q3_EUR	-0.0541438	0.0302923	0.0738762	1
SLC25A16	EUR	Cells_Cultured_fibroblasts	auto_RNFL_q4_EUR	0.076303	0.0310645	0.0140386	1
SLC25A16	EUR	Cells_Cultured_fibroblasts	auto_RNFL_q6_EUR	0.0788116	0.0313408	0.0119147	1
SLC25A16	EUR	Cells_Cultured_fibroblasts	auto_RNFL_q7_EUR	0.0198597	0.0301987	0.510774	1
SLC25A16	EUR	Cells_Cultured_fibroblasts	auto_RNFL_q8_EUR	-0.0528895	0.0306757	0.0846807	1
SLC25A16	EUR	Cells_Cultured_fibroblasts	moco_GCC_q3_EUR	-0.0850831	0.0313389	0.00662886	1
SLC25A16	EUR	Cells_Cultured_fibroblasts	moco_GCC_q8_EUR	-0.00794387	0.0301324	0.792063	1
SLC25A16	EUR	Cells_Cultured_fibroblasts	moco_RNFL_q1_EUR	0.0495447	0.0304025	0.103181	1
SLC25A16	EUR	Cells_Cultured_fibroblasts	moco_RNFL_q3_EUR	-0.0261312	0.0304644	0.391024	1
SLC25A16	EUR	Cells_Cultured_fibroblasts	moco_RNFL_q5_EUR	-0.0328207	0.0305425	0.282557	1
SLC25A16	EUR	Cells_Cultured_fibroblasts	moco_RNFL_q7_EUR	0.0543528	0.0309115	0.0786906	1
SLC25A16	EUR	Cells_Cultured_fibroblasts	moco_RNFL_q9_EUR	0.0317755	0.030114	0.291346	1
SLC25A16	EUR	Nerve_Tibial	auto_GCC_q0_EUR	-0.0258458	0.044135	0.558139	1
SLC25A16	EUR	Nerve_Tibial	auto_GCC_q10_EUR	-0.142152	0.0489715	0.00369904	1
SLC25A16	EUR	Nerve_Tibial	auto_GCC_q2_EUR	-0.12826	0.0486104	0.00832677	1
SLC25A16	EUR	Nerve_Tibial	auto_GCC_q3_EUR	0.0122768	0.0443139	0.781749	1
SLC25A16	EUR	Nerve_Tibial	auto_GCC_q4_EUR	-0.0982141	0.0465597	0.0349082	1
SLC25A16	EUR	Nerve_Tibial	auto_GCC_q6_EUR	0.0449071	0.0454647	0.323283	1
SLC25A16	EUR	Nerve_Tibial	auto_GCC_q8_EUR	-0.0542762	0.0450798	0.228589	1
SLC25A16	EUR	Nerve_Tibial	auto_RNFL_q0_EUR	-0.0284304	0.0444953	0.522854	1
SLC25A16	EUR	Nerve_Tibial	auto_RNFL_q1_EUR	0.0775374	0.0459052	0.091205	1
SLC25A16	EUR	Nerve_Tibial	auto_RNFL_q3_EUR	-0.0772143	0.045269	0.0880683	1
SLC25A16	EUR	Nerve_Tibial	auto_RNFL_q4_EUR	0.104029	0.0468681	0.0264444	1
SLC25A16	EUR	Nerve_Tibial	auto_RNFL_q6_EUR	0.11566	0.0478298	0.0155994	1
SLC25A16	EUR	Nerve_Tibial	auto_RNFL_q7_EUR	0.0290765	0.0445055	0.513547	1
SLC25A16	EUR	Nerve_Tibial	auto_RNFL_q8_EUR	-0.0655837	0.0454465	0.148993	1
SLC25A16	EUR	Nerve_Tibial	moco_GCC_q3_EUR	-0.104029	0.0468681	0.0264444	1
SLC25A16	EUR	Nerve_Tibial	moco_GCC_q8_EUR	-0.00549223	0.0442806	0.901289	1
SLC25A16	EUR	Nerve_Tibial	moco_RNFL_q1_EUR	0.0558916	0.0448113	0.2123	1
SLC25A16	EUR	Nerve_Tibial	moco_RNFL_q3_EUR	-0.0377995	0.0449859	0.400767	1
SLC25A16	EUR	Nerve_Tibial	moco_RNFL_q5_EUR	-0.0452302	0.0448346	0.31306	1
SLC25A16	EUR	Nerve_Tibial	moco_RNFL_q7_EUR	0.0746298	0.0460994	0.105472	1
SLC25A16	EUR	Nerve_Tibial	moco_RNFL_q9_EUR	0.0436148	0.0444762	0.326774	1
TSPAN10	Cross-ancestry	retina	auto_GCC_q0_all	0.510302	0.117286	1.35561e-05	1
TSPAN10	Cross-ancestry	retina	auto_GCC_q10_all	0.260891	0.087891	0.00299409	1
TSPAN10	Cross-ancestry	retina	auto_GCC_q2_all	0.274457	0.090025	0.00229852	1
TSPAN10	Cross-ancestry	retina	auto_GCC_q3_all	0.539522	0.121872	9.55679e-06	1
TSPAN10	Cross-ancestry	retina	auto_GCC_q4_all	-0.299502	0.0924307	0.00119408	1
TSPAN10	Cross-ancestry	retina	auto_GCC_q6_all	-0.361073	0.0997268	0.0002939	1
TSPAN10	Cross-ancestry	retina	auto_GCC_q8_all	-0.414294	0.105856	9.08725e-05	1
TSPAN10	Cross-ancestry	retina	auto_RNFL_q0_all	0.112705	0.078691	0.152074	1
TSPAN10	Cross-ancestry	retina	auto_RNFL_q1_all	0.0354811	0.0753985	0.63794	1
TSPAN10	Cross-ancestry	retina	auto_RNFL_q3_all	-0.178449	0.0823211	0.0301799	1
TSPAN10	Cross-ancestry	retina	auto_RNFL_q4_all	0.0271326	0.0752926	0.718576	1
TSPAN10	Cross-ancestry	retina	auto_RNFL_q6_all	0.164883	0.0814527	0.0429415	1
TSPAN10	Cross-ancestry	retina	auto_RNFL_q7_all	-0.0469603	0.0776648	0.545409	1
TSPAN10	Cross-ancestry	retina	auto_RNFL_q8_all	-0.211843	0.0847038	0.0123847	1
TSPAN10	Cross-ancestry	retina	moco_GCC_q3_all	-0.169057	0.0826873	0.0409006	1
TSPAN10	Cross-ancestry	retina	moco_GCC_q8_all	-0.050091	0.0777245	0.519272	1
TSPAN10	Cross-ancestry	retina	moco_RNFL_q1_all	0.164883	0.0814527	0.0429415	1
TSPAN10	Cross-ancestry	retina	moco_RNFL_q3_all	-0.156534	0.081931	0.0560606	1
TSPAN10	Cross-ancestry	retina	moco_RNFL_q5_all	-0.216017	0.0850251	0.0110653	1
TSPAN10	Cross-ancestry	retina	moco_RNFL_q7_all	0.0761801	0.078369	0.331016	1
TSPAN10	Cross-ancestry	retina	moco_RNFL_q9_all	0.0146099	0.0762294	0.848011	1
TSPAN10	Cross-ancestry	Artery_Coronary	auto_GCC_q0_all	-0.122251	0.0252143	1.24399e-06	1
TSPAN10	Cross-ancestry	Artery_Coronary	auto_GCC_q10_all	-0.0564802	0.0196262	0.00400469	1
TSPAN10	Cross-ancestry	Artery_Coronary	auto_GCC_q2_all	-0.0564802	0.0196262	0.00400469	1
TSPAN10	Cross-ancestry	Artery_Coronary	auto_GCC_q3_all	-0.128364	0.0258315	6.72038e-07	1
TSPAN10	Cross-ancestry	Artery_Coronary	auto_GCC_q4_all	0.0748179	0.0210594	0.000381285	1
TSPAN10	Cross-ancestry	Artery_Coronary	auto_GCC_q6_all	0.0765294	0.0211855	0.000303437	1
TSPAN10	Cross-ancestry	Artery_Coronary	auto_GCC_q8_all	0.104892	0.0235512	8.43724e-06	1
TSPAN10	Cross-ancestry	Artery_Coronary	auto_RNFL_q0_all	-0.0286068	0.0185795	0.123633	1
TSPAN10	Cross-ancestry	Artery_Coronary	auto_RNFL_q1_all	-0.00929111	0.0179263	0.604252	1
TSPAN10	Cross-ancestry	Artery_Coronary	auto_RNFL_q3_all	0.042788	0.0191317	0.0253189	1
TSPAN10	Cross-ancestry	Artery_Coronary	auto_RNFL_q4_all	-0.00366754	0.0178844	0.837518	1
TSPAN10	Cross-ancestry	Artery_Coronary	auto_RNFL_q6_all	-0.0435215	0.0191657	0.0231587	1
TSPAN10	Cross-ancestry	Artery_Coronary	auto_RNFL_q7_all	0.0107581	0.0184297	0.559395	1
TSPAN10	Cross-ancestry	Artery_Coronary	auto_RNFL_q8_all	0.0476781	0.019368	0.0138283	1
TSPAN10	Cross-ancestry	Artery_Coronary	moco_GCC_q3_all	0.044255	0.0192002	0.0211706	1
TSPAN10	Cross-ancestry	Artery_Coronary	moco_GCC_q8_all	0.00489006	0.0183784	0.79018	1
TSPAN10	Cross-ancestry	Artery_Coronary	moco_RNFL_q1_all	-0.0410765	0.0190544	0.0311029	1
TSPAN10	Cross-ancestry	Artery_Coronary	moco_RNFL_q3_all	0.0391205	0.0192028	0.0416278	1
TSPAN10	Cross-ancestry	Artery_Coronary	moco_RNFL_q5_all	0.0491451	0.0194433	0.0114841	1
TSPAN10	Cross-ancestry	Artery_Coronary	moco_RNFL_q7_all	-0.0244503	0.018457	0.185265	1
TSPAN10	Cross-ancestry	Artery_Coronary	moco_RNFL_q9_all	-0.0080686	0.0181577	0.656781	1
TSPAN10	Cross-ancestry	Artery_Tibial	auto_GCC_q0_all	0.116741	0.0203254	9.26936e-09	1
TSPAN10	Cross-ancestry	Artery_Tibial	auto_GCC_q10_all	0.0570519	0.0181795	0.00169959	1
TSPAN10	Cross-ancestry	Artery_Tibial	auto_GCC_q2_all	0.0618462	0.0185207	0.000839923	1
TSPAN10	Cross-ancestry	Artery_Tibial	auto_GCC_q3_all	0.124651	0.0208648	2.31165e-09	1
TSPAN10	Cross-ancestry	Artery_Tibial	auto_GCC_q4_all	-0.064483	0.0185849	0.00052116	1
TSPAN10	Cross-ancestry	Artery_Tibial	auto_GCC_q6_all	-0.0822219	0.0193021	2.04671e-05	1
TSPAN10	Cross-ancestry	Artery_Tibial	auto_GCC_q8_all	-0.0927693	0.019641	2.32119e-06	1
TSPAN10	Cross-ancestry	Artery_Tibial	auto_RNFL_q0_all	0.0256494	0.0178989	0.151854	1
TSPAN10	Cross-ancestry	Artery_Tibial	auto_RNFL_q1_all	0.00383542	0.0175307	0.826819	1
TSPAN10	Cross-ancestry	Artery_Tibial	auto_RNFL_q3_all	-0.0328408	0.0179827	0.0678139	1
TSPAN10	Cross-ancestry	Artery_Tibial	auto_RNFL_q4_all	-0.00119857	0.017528	0.945483	1
TSPAN10	Cross-ancestry	Artery_Tibial	auto_RNFL_q6_all	0.0290054	0.0179355	0.105834	1
TSPAN10	Cross-ancestry	Artery_Tibial	auto_RNFL_q7_all	-0.013424	0.0180421	0.456854	1
TSPAN10	Cross-ancestry	Artery_Tibial	auto_RNFL_q8_all	-0.0438676	0.0183845	0.017027	1
TSPAN10	Cross-ancestry	Artery_Tibial	moco_GCC_q3_all	-0.0278068	0.0181592	0.125701	1
TSPAN10	Cross-ancestry	Artery_Tibial	moco_GCC_q8_all	0.000719142	0.0180064	0.968143	1
TSPAN10	Cross-ancestry	Artery_Tibial	moco_RNFL_q1_all	0.0237317	0.01788	0.184417	1
TSPAN10	Cross-ancestry	Artery_Tibial	moco_RNFL_q3_all	-0.0297245	0.0181809	0.102064	1
TSPAN10	Cross-ancestry	Artery_Tibial	moco_RNFL_q5_all	-0.0330805	0.0179859	0.0658784	1
TSPAN10	Cross-ancestry	Artery_Tibial	moco_RNFL_q7_all	0.0110268	0.0180305	0.540824	1
TSPAN10	Cross-ancestry	Artery_Tibial	moco_RNFL_q9_all	0.00287657	0.0177687	0.871393	1
TSPAN10	Cross-ancestry	Brain_Frontal_Cortex_BA9	auto_GCC_q0_all	-0.0238439	0.0169065	0.158441	1
TSPAN10	Cross-ancestry	Brain_Frontal_Cortex_BA9	auto_GCC_q10_all	-0.000139438	0.0163449	0.993193	1
TSPAN10	Cross-ancestry	Brain_Frontal_Cortex_BA9	auto_GCC_q2_all	0.00725076	0.0165363	0.661042	1
TSPAN10	Cross-ancestry	Brain_Frontal_Cortex_BA9	auto_GCC_q3_all	-0.0172903	0.016916	0.306722	1
TSPAN10	Cross-ancestry	Brain_Frontal_Cortex_BA9	auto_GCC_q4_all	0.0228678	0.0168622	0.175049	1
TSPAN10	Cross-ancestry	Brain_Frontal_Cortex_BA9	auto_GCC_q6_all	0.00474088	0.0166454	0.775785	1
TSPAN10	Cross-ancestry	Brain_Frontal_Cortex_BA9	auto_GCC_q8_all	0.0185452	0.0168232	0.270306	1
TSPAN10	Cross-ancestry	Brain_Frontal_Cortex_BA9	auto_RNFL_q0_all	0.00250988	0.0164903	0.879026	1
TSPAN10	Cross-ancestry	Brain_Frontal_Cortex_BA9	auto_RNFL_q1_all	-0.00264932	0.016491	0.872367	1
TSPAN10	Cross-ancestry	Brain_Frontal_Cortex_BA9	auto_RNFL_q3_all	0.00209157	0.0163492	0.898204	1
TSPAN10	Cross-ancestry	Brain_Frontal_Cortex_BA9	auto_RNFL_q4_all	-0.026772	0.0171834	0.119229	1
TSPAN10	Cross-ancestry	Brain_Frontal_Cortex_BA9	auto_RNFL_q6_all	-0.0249594	0.0170935	0.144245	1
TSPAN10	Cross-ancestry	Brain_Frontal_Cortex_BA9	auto_RNFL_q7_all	-0.0220312	0.0170961	0.197514	1
TSPAN10	Cross-ancestry	Brain_Frontal_Cortex_BA9	auto_RNFL_q8_all	0.000418313	0.0164842	0.979755	1
TSPAN10	Cross-ancestry	Brain_Frontal_Cortex_BA9	moco_GCC_q3_all	0.0276087	0.0172268	0.109011	1
TSPAN10	Cross-ancestry	Brain_Frontal_Cortex_BA9	moco_GCC_q8_all	0.0234255	0.0170221	0.168764	1
TSPAN10	Cross-ancestry	Brain_Frontal_Cortex_BA9	moco_RNFL_q1_all	-0.0185452	0.0168232	0.270306	1
TSPAN10	Cross-ancestry	Brain_Frontal_Cortex_BA9	moco_RNFL_q3_all	-0.00697189	0.0166712	0.675801	1
TSPAN10	Cross-ancestry	Brain_Frontal_Cortex_BA9	moco_RNFL_q5_all	0.00641414	0.0166638	0.700301	1
TSPAN10	Cross-ancestry	Brain_Frontal_Cortex_BA9	moco_RNFL_q7_all	0.00822683	0.0166899	0.622068	1
TSPAN10	Cross-ancestry	Brain_Frontal_Cortex_BA9	moco_RNFL_q9_all	-0.0341622	0.0176086	0.0523689	1
SLC25A16	Cross-ancestry	retina	auto_GCC_q0_all	0.0270117	0.031976	0.398251	9
SLC25A16	Cross-ancestry	retina	auto_GCC_q10_all	-0.169387	0.0331397	3.19939e-07	9
SLC25A16	Cross-ancestry	retina	auto_GCC_q2_all	-0.19248	0.0337635	1.19219e-08	9
SLC25A16	Cross-ancestry	retina	auto_GCC_q3_all	0.0677512	0.0322757	0.0358046	9
SLC25A16	Cross-ancestry	retina	auto_GCC_q4_all	-0.180986	0.0331599	4.81609e-08	9
SLC25A16	Cross-ancestry	retina	auto_GCC_q6_all	0.0830867	0.0327372	0.0111492	9
SLC25A16	Cross-ancestry	retina	auto_GCC_q8_all	-0.138713	0.0328764	2.4514e-05	9
SLC25A16	Cross-ancestry	retina	auto_RNFL_q0_all	-0.0164445	0.0318711	0.605875	9
SLC25A16	Cross-ancestry	retina	auto_RNFL_q1_all	0.147376	0.0329153	7.55429e-06	9
SLC25A16	Cross-ancestry	retina	auto_RNFL_q3_all	-0.17933	0.0337925	1.11562e-07	8
SLC25A16	Cross-ancestry	retina	auto_RNFL_q4_all	0.183688	0.0330231	2.661e-08	9
SLC25A16	Cross-ancestry	retina	auto_RNFL_q6_all	0.270155	0.0338155	1.35935e-15	9
SLC25A16	Cross-ancestry	retina	auto_RNFL_q7_all	-0.00541763	0.0323682	0.867075	9
SLC25A16	Cross-ancestry	retina	auto_RNFL_q8_all	-0.143931	0.032483	9.38112e-06	9
SLC25A16	Cross-ancestry	retina	moco_GCC_q3_all	-0.146372	0.0333258	1.12238e-05	8
SLC25A16	Cross-ancestry	retina	moco_GCC_q8_all	-0.0363518	0.0324993	0.263336	9
SLC25A16	Cross-ancestry	retina	moco_RNFL_q1_all	0.0924009	0.035397	0.00904312	7
SLC25A16	Cross-ancestry	retina	moco_RNFL_q3_all	-0.0690498	0.0326028	0.0341825	9
SLC25A16	Cross-ancestry	retina	moco_RNFL_q5_all	-0.122359	0.0331082	0.000219272	8
SLC25A16	Cross-ancestry	retina	moco_RNFL_q7_all	0.171187	0.0333609	2.87648e-07	9
SLC25A16	Cross-ancestry	retina	moco_RNFL_q9_all	0.172114	0.0334288	2.62334e-07	9
SLC25A16	Cross-ancestry	Artery_Aorta	auto_GCC_q0_all	-0.0163374	0.0271713	0.547658	1
SLC25A16	Cross-ancestry	Artery_Aorta	auto_GCC_q10_all	-0.0842666	0.0286362	0.00325405	1
SLC25A16	Cross-ancestry	Artery_Aorta	auto_GCC_q2_all	-0.0795374	0.028654	0.00550676	1
SLC25A16	Cross-ancestry	Artery_Aorta	auto_GCC_q3_all	0.00537415	0.0273262	0.844089	1
SLC25A16	Cross-ancestry	Artery_Aorta	auto_GCC_q4_all	-0.0642748	0.028333	0.0232957	1
SLC25A16	Cross-ancestry	Artery_Aorta	auto_GCC_q6_all	0.0227864	0.0276623	0.41009	1
SLC25A16	Cross-ancestry	Artery_Aorta	auto_GCC_q8_all	-0.0371891	0.0278748	0.182155	1
SLC25A16	Cross-ancestry	Artery_Aorta	auto_RNFL_q0_all	-0.00580408	0.0273274	0.831802	1
SLC25A16	Cross-ancestry	Artery_Aorta	auto_RNFL_q1_all	0.037834	0.0274625	0.168308	1
SLC25A16	Cross-ancestry	Artery_Aorta	auto_RNFL_q3_all	-0.0526667	0.0282135	0.0619406	1
SLC25A16	Cross-ancestry	Artery_Aorta	auto_RNFL_q4_all	0.0606204	0.0280149	0.0304747	1
SLC25A16	Cross-ancestry	Artery_Aorta	auto_RNFL_q6_all	0.0831918	0.0289976	0.00411881	1
SLC25A16	Cross-ancestry	Artery_Aorta	auto_RNFL_q7_all	0.0238612	0.0276747	0.388575	1
SLC25A16	Cross-ancestry	Artery_Aorta	auto_RNFL_q8_all	-0.0406286	0.0279403	0.145912	1
SLC25A16	Cross-ancestry	Artery_Aorta	moco_GCC_q3_all	-0.0578258	0.0283511	0.041387	1
SLC25A16	Cross-ancestry	Artery_Aorta	moco_GCC_q8_all	-0.0133279	0.0275778	0.628895	1
SLC25A16	Cross-ancestry	Artery_Aorta	moco_RNFL_q1_all	0.0346095	0.0276168	0.210131	1
SLC25A16	Cross-ancestry	Artery_Aorta	moco_RNFL_q3_all	-0.0163374	0.0278142	0.556951	1
SLC25A16	Cross-ancestry	Artery_Aorta	moco_RNFL_q5_all	-0.025151	0.0276903	0.363721	1
SLC25A16	Cross-ancestry	Artery_Aorta	moco_RNFL_q7_all	0.0475075	0.0280881	0.0907651	1
SLC25A16	Cross-ancestry	Artery_Aorta	moco_RNFL_q9_all	0.0414884	0.0279575	0.137814	1
SLC25A16	Cross-ancestry	Artery_Tibial	auto_GCC_q0_all	-0.00863439	0.0449298	0.847605	1
SLC25A16	Cross-ancestry	Artery_Tibial	auto_GCC_q10_all	-0.0828901	0.0458773	0.0707967	1
SLC25A16	Cross-ancestry	Artery_Tibial	auto_GCC_q2_all	-0.0764143	0.0460241	0.0968519	1
SLC25A16	Cross-ancestry	Artery_Tibial	auto_GCC_q3_all	0.0103613	0.0453699	0.819356	1
SLC25A16	Cross-ancestry	Artery_Tibial	auto_GCC_q4_all	-0.0539649	0.0456801	0.237458	1
SLC25A16	Cross-ancestry	Artery_Tibial	auto_GCC_q6_all	0.0198591	0.045015	0.659093	1
SLC25A16	Cross-ancestry	Artery_Tibial	auto_GCC_q8_all	-0.0198591	0.0454456	0.662122	1
SLC25A16	Cross-ancestry	Artery_Tibial	auto_RNFL_q0_all	0.0112247	0.0445122	0.800909	1
SLC25A16	Cross-ancestry	Artery_Tibial	auto_RNFL_q1_all	0.0181322	0.0445668	0.684115	1
SLC25A16	Cross-ancestry	Artery_Tibial	auto_RNFL_q3_all	-0.0565552	0.0461789	0.220688	1
SLC25A16	Cross-ancestry	Artery_Tibial	auto_RNFL_q4_all	0.0699385	0.0457767	0.126558	1
SLC25A16	Cross-ancestry	Artery_Tibial	auto_RNFL_q6_all	0.112679	0.0481777	0.0193449	1
SLC25A16	Cross-ancestry	Artery_Tibial	auto_RNFL_q7_all	0.0526698	0.0460686	0.252919	1
SLC25A16	Cross-ancestry	Artery_Tibial	auto_RNFL_q8_all	-0.0332424	0.0456326	0.46632	1
SLC25A16	Cross-ancestry	Artery_Tibial	moco_GCC_q3_all	-0.0811632	0.0470498	0.0845183	1
SLC25A16	Cross-ancestry	Artery_Tibial	moco_GCC_q8_all	-0.0168371	0.0458473	0.713439	1
SLC25A16	Cross-ancestry	Artery_Tibial	moco_RNFL_q1_all	0.0410133	0.0453564	0.365865	1
SLC25A16	Cross-ancestry	Artery_Tibial	moco_RNFL_q3_all	-0.0228811	0.0454797	0.614889	1
SLC25A16	Cross-ancestry	Artery_Tibial	moco_RNFL_q5_all	-0.0379913	0.0452933	0.40159	1
SLC25A16	Cross-ancestry	Artery_Tibial	moco_RNFL_q7_all	0.0872073	0.0473082	0.0652723	1
SLC25A16	Cross-ancestry	Artery_Tibial	moco_RNFL_q9_all	0.0470574	0.0459229	0.305502	1
SLC25A16	Cross-ancestry	Brain_Anterior_cingulate_cortex_BA24	auto_GCC_q0_all	0.000108795	0.0174359	0.995021	1
SLC25A16	Cross-ancestry	Brain_Anterior_cingulate_cortex_BA24	auto_GCC_q10_all	-0.0546151	0.0192995	0.00465678	1
SLC25A16	Cross-ancestry	Brain_Anterior_cingulate_cortex_BA24	auto_GCC_q2_all	-0.0613604	0.0199748	0.0021271	1
SLC25A16	Cross-ancestry	Brain_Anterior_cingulate_cortex_BA24	auto_GCC_q3_all	0.0133818	0.0177755	0.451558	1
SLC25A16	Cross-ancestry	Brain_Anterior_cingulate_cortex_BA24	auto_GCC_q4_all	-0.0474346	0.0189342	0.0122368	1
SLC25A16	Cross-ancestry	Brain_Anterior_cingulate_cortex_BA24	auto_GCC_q6_all	0.0267636	0.0182435	0.142372	1
SLC25A16	Cross-ancestry	Brain_Anterior_cingulate_cortex_BA24	auto_GCC_q8_all	-0.0378607	0.0186104	0.0419134	1
SLC25A16	Cross-ancestry	Brain_Anterior_cingulate_cortex_BA24	auto_RNFL_q0_all	-0.0117499	0.0176395	0.505341	1
SLC25A16	Cross-ancestry	Brain_Anterior_cingulate_cortex_BA24	auto_RNFL_q1_all	0.0390574	0.018465	0.0344114	1
SLC25A16	Cross-ancestry	Brain_Anterior_cingulate_cortex_BA24	auto_RNFL_q3_all	-0.0416685	0.0187045	0.025899	1
SLC25A16	Cross-ancestry	Brain_Anterior_cingulate_cortex_BA24	auto_RNFL_q4_all	0.0421037	0.0186264	0.0237945	1
SLC25A16	Cross-ancestry	Brain_Anterior_cingulate_cortex_BA24	auto_RNFL_q6_all	0.042974	0.0187759	0.0220919	1
SLC25A16	Cross-ancestry	Brain_Anterior_cingulate_cortex_BA24	auto_RNFL_q7_all	-0.0109883	0.0177358	0.53555	1
SLC25A16	Cross-ancestry	Brain_Anterior_cingulate_cortex_BA24	auto_RNFL_q8_all	-0.0336177	0.0183079	0.0663228	1
SLC25A16	Cross-ancestry	Brain_Anterior_cingulate_cortex_BA24	moco_GCC_q3_all	-0.0286131	0.0181008	0.113931	1
SLC25A16	Cross-ancestry	Brain_Anterior_cingulate_cortex_BA24	moco_GCC_q8_all	0.0113147	0.0177407	0.523617	1
SLC25A16	Cross-ancestry	Brain_Anterior_cingulate_cortex_BA24	moco_RNFL_q1_all	0.0226294	0.0178945	0.206014	1
SLC25A16	Cross-ancestry	Brain_Anterior_cingulate_cortex_BA24	moco_RNFL_q3_all	-0.0291571	0.018227	0.109672	1
SLC25A16	Cross-ancestry	Brain_Anterior_cingulate_cortex_BA24	moco_RNFL_q5_all	-0.0330737	0.0183882	0.0720757	1
SLC25A16	Cross-ancestry	Brain_Anterior_cingulate_cortex_BA24	moco_RNFL_q7_all	0.039275	0.0186813	0.0355207	1
SLC25A16	Cross-ancestry	Brain_Anterior_cingulate_cortex_BA24	moco_RNFL_q9_all	0.0172984	0.0177498	0.329775	1
SLC25A16	Cross-ancestry	Brain_Caudate_basal_ganglia	auto_GCC_q0_all	0.00473389	0.0132256	0.720393	1
SLC25A16	Cross-ancestry	Brain_Caudate_basal_ganglia	auto_GCC_q10_all	-0.0355682	0.0135011	0.00842727	1
SLC25A16	Cross-ancestry	Brain_Caudate_basal_ganglia	auto_GCC_q2_all	-0.0486183	0.0140719	0.000550326	1
SLC25A16	Cross-ancestry	Brain_Caudate_basal_ganglia	auto_GCC_q3_all	0.0113869	0.0133984	0.395396	1
SLC25A16	Cross-ancestry	Brain_Caudate_basal_ganglia	auto_GCC_q4_all	-0.0420932	0.013953	0.00255469	1
SLC25A16	Cross-ancestry	Brain_Caudate_basal_ganglia	auto_GCC_q6_all	0.0231577	0.0134433	0.0849585	1
SLC25A16	Cross-ancestry	Brain_Caudate_basal_ganglia	auto_GCC_q8_all	-0.0300666	0.0137211	0.028432	1
SLC25A16	Cross-ancestry	Brain_Caudate_basal_ganglia	auto_RNFL_q0_all	0.00716481	0.0132379	0.588347	1
SLC25A16	Cross-ancestry	Brain_Caudate_basal_ganglia	auto_RNFL_q1_all	0.0290431	0.0134477	0.0307951	1
SLC25A16	Cross-ancestry	Brain_Caudate_basal_ganglia	auto_RNFL_q3_all	-0.0523287	0.0144567	0.000294967	1
SLC25A16	Cross-ancestry	Brain_Caudate_basal_ganglia	auto_RNFL_q4_all	0.035824	0.0136312	0.00858669	1
SLC25A16	Cross-ancestry	Brain_Caudate_basal_ganglia	auto_RNFL_q6_all	0.0661465	0.0149703	9.93734e-06	1
SLC25A16	Cross-ancestry	Brain_Caudate_basal_ganglia	auto_RNFL_q7_all	0.00191915	0.0133452	0.885652	1
SLC25A16	Cross-ancestry	Brain_Caudate_basal_ganglia	auto_RNFL_q8_all	-0.0332652	0.0138042	0.0159621	1
SLC25A16	Cross-ancestry	Brain_Caudate_basal_ganglia	moco_GCC_q3_all	-0.0433727	0.0141177	0.00212479	1
SLC25A16	Cross-ancestry	Brain_Caudate_basal_ganglia	moco_GCC_q8_all	-0.0199591	0.0136373	0.143311	1
SLC25A16	Cross-ancestry	Brain_Caudate_basal_ganglia	moco_RNFL_q1_all	0.0356961	0.01375	0.00942946	1
SLC25A16	Cross-ancestry	Brain_Caudate_basal_ganglia	moco_RNFL_q3_all	-0.0116428	0.0134009	0.384951	1
SLC25A16	Cross-ancestry	Brain_Caudate_basal_ganglia	moco_RNFL_q5_all	-0.0227739	0.0134359	0.0900761	1
SLC25A16	Cross-ancestry	Brain_Caudate_basal_ganglia	moco_RNFL_q7_all	0.0262283	0.0136318	0.0543477	1
SLC25A16	Cross-ancestry	Brain_Caudate_basal_ganglia	moco_RNFL_q9_all	0.033649	0.0138147	0.0148617	1
SLC25A16	Cross-ancestry	Brain_Cerebellar_Hemisphere	auto_GCC_q0_all	-0.00440555	0.012383	0.72201	1
SLC25A16	Cross-ancestry	Brain_Cerebellar_Hemisphere	auto_GCC_q10_all	-0.0391604	0.0128252	0.00226264	1
SLC25A16	Cross-ancestry	Brain_Cerebellar_Hemisphere	auto_GCC_q2_all	-0.0379856	0.0128872	0.00320308	1
SLC25A16	Cross-ancestry	Brain_Cerebellar_Hemisphere	auto_GCC_q3_all	0.00606986	0.0124868	0.626894	1
SLC25A16	Cross-ancestry	Brain_Cerebellar_Hemisphere	auto_GCC_q4_all	-0.0308388	0.0127152	0.0152939	1
SLC25A16	Cross-ancestry	Brain_Cerebellar_Hemisphere	auto_GCC_q6_all	0.0124334	0.0125289	0.321013	1
SLC25A16	Cross-ancestry	Brain_Cerebellar_Hemisphere	auto_GCC_q8_all	-0.0199718	0.0126159	0.113406	1
SLC25A16	Cross-ancestry	Brain_Cerebellar_Hemisphere	auto_RNFL_q0_all	-0.00489505	0.0123847	0.692657	1
SLC25A16	Cross-ancestry	Brain_Cerebellar_Hemisphere	auto_RNFL_q1_all	0.0211466	0.0125367	0.091645	1
SLC25A16	Cross-ancestry	Brain_Cerebellar_Hemisphere	auto_RNFL_q3_all	-0.0238878	0.0126767	0.0595113	1
SLC25A16	Cross-ancestry	Brain_Cerebellar_Hemisphere	auto_RNFL_q4_all	0.0309367	0.0127174	0.0149894	1
SLC25A16	Cross-ancestry	Brain_Cerebellar_Hemisphere	auto_RNFL_q6_all	0.0390625	0.0130095	0.00267674	1
SLC25A16	Cross-ancestry	Brain_Cerebellar_Hemisphere	auto_RNFL_q7_all	0.0105733	0.0126109	0.401791	1
SLC25A16	Cross-ancestry	Brain_Cerebellar_Hemisphere	auto_RNFL_q8_all	-0.0205592	0.0126243	0.10341	1
SLC25A16	Cross-ancestry	Brain_Cerebellar_Hemisphere	moco_GCC_q3_all	-0.0269228	0.012731	0.0344516	1
SLC25A16	Cross-ancestry	Brain_Cerebellar_Hemisphere	moco_GCC_q8_all	-0.00215382	0.0125728	0.863982	1
SLC25A16	Cross-ancestry	Brain_Cerebellar_Hemisphere	moco_RNFL_q1_all	0.016839	0.0125749	0.18054	1
SLC25A16	Cross-ancestry	Brain_Cerebellar_Hemisphere	moco_RNFL_q3_all	-0.0121397	0.0126235	0.336213	1
SLC25A16	Cross-ancestry	Brain_Cerebellar_Hemisphere	moco_RNFL_q5_all	-0.0167411	0.0125737	0.183047	1
SLC25A16	Cross-ancestry	Brain_Cerebellar_Hemisphere	moco_RNFL_q7_all	0.0269228	0.0128266	0.0358187	1
SLC25A16	Cross-ancestry	Brain_Cerebellar_Hemisphere	moco_RNFL_q9_all	0.0149789	0.0126508	0.236403	1
SLC25A16	Cross-ancestry	Brain_Cerebellum	auto_GCC_q0_all	-0.00492252	0.013828	0.721853	1
SLC25A16	Cross-ancestry	Brain_Cerebellum	auto_GCC_q10_all	-0.0437558	0.0143853	0.00235248	1
SLC25A16	Cross-ancestry	Brain_Cerebellum	auto_GCC_q2_all	-0.0424431	0.0144506	0.00331278	1
SLC25A16	Cross-ancestry	Brain_Cerebellum	auto_GCC_q3_all	0.00678215	0.0139448	0.626713	1
SLC25A16	Cross-ancestry	Brain_Cerebellum	auto_GCC_q4_all	-0.0344577	0.0142385	0.0155193	1
SLC25A16	Cross-ancestry	Brain_Cerebellum	auto_GCC_q6_all	0.0138925	0.0139969	0.320934	1
SLC25A16	Cross-ancestry	Brain_Cerebellum	auto_GCC_q8_all	-0.0223154	0.0141044	0.113612	1
SLC25A16	Cross-ancestry	Brain_Cerebellum	auto_RNFL_q0_all	-0.00546947	0.01383	0.69249	1
SLC25A16	Cross-ancestry	Brain_Cerebellum	auto_RNFL_q1_all	0.0236281	0.014018	0.0918811	1
SLC25A16	Cross-ancestry	Brain_Cerebellum	auto_RNFL_q3_all	-0.026691	0.0141795	0.0597863	1
SLC25A16	Cross-ancestry	Brain_Cerebellum	auto_RNFL_q4_all	0.0345671	0.0142412	0.0152132	1
SLC25A16	Cross-ancestry	Brain_Cerebellum	auto_RNFL_q6_all	0.0436464	0.0145902	0.0027762	1
SLC25A16	Cross-ancestry	Brain_Cerebellum	auto_RNFL_q7_all	0.0118141	0.0140867	0.401655	1
SLC25A16	Cross-ancestry	Brain_Cerebellum	auto_RNFL_q8_all	-0.0229718	0.0141148	0.103632	1
SLC25A16	Cross-ancestry	Brain_Cerebellum	moco_GCC_q3_all	-0.0300821	0.0142466	0.034727	1
SLC25A16	Cross-ancestry	Brain_Cerebellum	moco_GCC_q8_all	-0.00240657	0.0140396	0.863899	1
SLC25A16	Cross-ancestry	Brain_Cerebellum	moco_RNFL_q1_all	0.018815	0.0140537	0.18064	1
SLC25A16	Cross-ancestry	Brain_Cerebellum	moco_RNFL_q3_all	-0.0135643	0.0141023	0.336125	1
SLC25A16	Cross-ancestry	Brain_Cerebellum	moco_RNFL_q5_all	-0.0187056	0.0140523	0.183142	1
SLC25A16	Cross-ancestry	Brain_Cerebellum	moco_RNFL_q7_all	0.0300821	0.0143533	0.036097	1
SLC25A16	Cross-ancestry	Brain_Cerebellum	moco_RNFL_q9_all	0.0167366	0.014136	0.236426	1
SLC25A16	Cross-ancestry	Brain_Cortex	auto_GCC_q0_all	-0.00410889	0.0207484	0.843018	1
SLC25A16	Cross-ancestry	Brain_Cortex	auto_GCC_q10_all	-0.0518747	0.0217487	0.0170707	1
SLC25A16	Cross-ancestry	Brain_Cortex	auto_GCC_q2_all	-0.0508475	0.0220192	0.0209305	1
SLC25A16	Cross-ancestry	Brain_Cortex	auto_GCC_q3_all	0.00821777	0.0207742	0.692418	1
SLC25A16	Cross-ancestry	Brain_Cortex	auto_GCC_q4_all	-0.0446841	0.0217344	0.0397907	1
SLC25A16	Cross-ancestry	Brain_Cortex	auto_GCC_q6_all	0.0097586	0.0209589	0.641497	1
SLC25A16	Cross-ancestry	Brain_Cortex	auto_GCC_q8_all	-0.0315015	0.0214069	0.141141	1
SLC25A16	Cross-ancestry	Brain_Cortex	auto_RNFL_q0_all	-0.00273926	0.0207436	0.894942	1
SLC25A16	Cross-ancestry	Brain_Cortex	auto_RNFL_q1_all	0.0289334	0.0209949	0.168168	1
SLC25A16	Cross-ancestry	Brain_Cortex	auto_RNFL_q3_all	-0.0439993	0.0217048	0.0426455	1
SLC25A16	Cross-ancestry	Brain_Cortex	auto_RNFL_q4_all	0.0467386	0.0216632	0.0309662	1
SLC25A16	Cross-ancestry	Brain_Cortex	auto_RNFL_q6_all	0.0623181	0.0226343	0.00590044	1
SLC25A16	Cross-ancestry	Brain_Cortex	auto_RNFL_q7_all	0.019346	0.0210993	0.359193	1
SLC25A16	Cross-ancestry	Brain_Cortex	auto_RNFL_q8_all	-0.0291046	0.021335	0.172514	1
SLC25A16	Cross-ancestry	Brain_Cortex	moco_GCC_q3_all	-0.0417737	0.0217758	0.0550658	1
SLC25A16	Cross-ancestry	Brain_Cortex	moco_GCC_q8_all	-0.00599212	0.0209289	0.774642	1
SLC25A16	Cross-ancestry	Brain_Cortex	moco_RNFL_q1_all	0.0332135	0.021295	0.118835	1
SLC25A16	Cross-ancestry	Brain_Cortex	moco_RNFL_q3_all	-0.0107858	0.0209695	0.607003	1
SLC25A16	Cross-ancestry	Brain_Cortex	moco_RNFL_q5_all	-0.026879	0.0212731	0.206404	1
SLC25A16	Cross-ancestry	Brain_Cortex	moco_RNFL_q7_all	0.0328711	0.0214505	0.125419	1
SLC25A16	Cross-ancestry	Brain_Cortex	moco_RNFL_q9_all	0.039548	0.0216876	0.0682234	1
SLC25A16	Cross-ancestry	Brain_Frontal_Cortex_BA9	auto_GCC_q0_all	-0.0175603	0.0225743	0.436635	1
SLC25A16	Cross-ancestry	Brain_Frontal_Cortex_BA9	auto_GCC_q10_all	-0.0648101	0.0235055	0.0058294	1
SLC25A16	Cross-ancestry	Brain_Frontal_Cortex_BA9	auto_GCC_q2_all	-0.0633618	0.0236162	0.00729687	1
SLC25A16	Cross-ancestry	Brain_Frontal_Cortex_BA9	auto_GCC_q3_all	-0.000905169	0.0224707	0.967868	1
SLC25A16	Cross-ancestry	Brain_Frontal_Cortex_BA9	auto_GCC_q4_all	-0.0463447	0.0231841	0.0456097	1
SLC25A16	Cross-ancestry	Brain_Frontal_Cortex_BA9	auto_GCC_q6_all	0.0258878	0.0226955	0.254012	1
SLC25A16	Cross-ancestry	Brain_Frontal_Cortex_BA9	auto_GCC_q8_all	-0.0242585	0.0228475	0.288345	1
SLC25A16	Cross-ancestry	Brain_Frontal_Cortex_BA9	auto_RNFL_q0_all	-0.00579308	0.022301	0.795043	1
SLC25A16	Cross-ancestry	Brain_Frontal_Cortex_BA9	auto_RNFL_q1_all	0.0302326	0.0224201	0.17751	1
SLC25A16	Cross-ancestry	Brain_Frontal_Cortex_BA9	auto_RNFL_q3_all	-0.0400085	0.0231811	0.0843634	1
SLC25A16	Cross-ancestry	Brain_Frontal_Cortex_BA9	auto_RNFL_q4_all	0.0461636	0.0230033	0.0447682	1
SLC25A16	Cross-ancestry	Brain_Frontal_Cortex_BA9	auto_RNFL_q6_all	0.0631808	0.0237797	0.00788565	1
SLC25A16	Cross-ancestry	Brain_Frontal_Cortex_BA9	auto_RNFL_q7_all	0.0124913	0.0227035	0.582186	1
SLC25A16	Cross-ancestry	Brain_Frontal_Cortex_BA9	auto_RNFL_q8_all	-0.0305947	0.0229626	0.182738	1
SLC25A16	Cross-ancestry	Brain_Frontal_Cortex_BA9	moco_GCC_q3_all	-0.0416378	0.0232246	0.0729994	1
SLC25A16	Cross-ancestry	Brain_Frontal_Cortex_BA9	moco_GCC_q8_all	-0.0124913	0.0228839	0.585165	1
SLC25A16	Cross-ancestry	Brain_Frontal_Cortex_BA9	moco_RNFL_q1_all	0.0182844	0.022583	0.418139	1
SLC25A16	Cross-ancestry	Brain_Frontal_Cortex_BA9	moco_RNFL_q3_all	-0.0228103	0.0230044	0.321411	1
SLC25A16	Cross-ancestry	Brain_Frontal_Cortex_BA9	moco_RNFL_q5_all	-0.0231723	0.022651	0.3063	1
SLC25A16	Cross-ancestry	Brain_Frontal_Cortex_BA9	moco_RNFL_q7_all	0.0394654	0.0231669	0.0884707	1
SLC25A16	Cross-ancestry	Brain_Frontal_Cortex_BA9	moco_RNFL_q9_all	0.0206379	0.0227935	0.365239	1
SLC25A16	Cross-ancestry	Brain_Hypothalamus	auto_GCC_q0_all	-0.0121397	0.0156081	0.436697	1
SLC25A16	Cross-ancestry	Brain_Hypothalamus	auto_GCC_q10_all	-0.0448044	0.0160737	0.00531254	1
SLC25A16	Cross-ancestry	Brain_Hypothalamus	auto_GCC_q2_all	-0.0438032	0.0161595	0.00671449	1
SLC25A16	Cross-ancestry	Brain_Hypothalamus	auto_GCC_q3_all	-0.00062576	0.0155512	0.967903	1
SLC25A16	Cross-ancestry	Brain_Hypothalamus	auto_GCC_q4_all	-0.0320389	0.0159445	0.0444942	1
SLC25A16	Cross-ancestry	Brain_Hypothalamus	auto_GCC_q6_all	0.0178967	0.0156749	0.253559	1
SLC25A16	Cross-ancestry	Brain_Hypothalamus	auto_GCC_q8_all	-0.0167704	0.0157839	0.288008	1
SLC25A16	Cross-ancestry	Brain_Hypothalamus	auto_RNFL_q0_all	-0.00400487	0.0154324	0.795242	1
SLC25A16	Cross-ancestry	Brain_Hypothalamus	auto_RNFL_q1_all	0.0209004	0.0154726	0.17676	1
SLC25A16	Cross-ancestry	Brain_Hypothalamus	auto_RNFL_q3_all	-0.0276586	0.0159678	0.0832467	1
SLC25A16	Cross-ancestry	Brain_Hypothalamus	auto_RNFL_q4_all	0.0319138	0.0158196	0.0436589	1
SLC25A16	Cross-ancestry	Brain_Hypothalamus	auto_RNFL_q6_all	0.0436781	0.0162747	0.00727898	1
SLC25A16	Cross-ancestry	Brain_Hypothalamus	auto_RNFL_q7_all	0.00863549	0.0157046	0.582409	1
SLC25A16	Cross-ancestry	Brain_Hypothalamus	auto_RNFL_q8_all	-0.0211507	0.0158473	0.181988	1
SLC25A16	Cross-ancestry	Brain_Hypothalamus	moco_GCC_q3_all	-0.028785	0.0159918	0.0718632	1
SLC25A16	Cross-ancestry	Brain_Hypothalamus	moco_GCC_q8_all	-0.00863549	0.0158293	0.585383	1
SLC25A16	Cross-ancestry	Brain_Hypothalamus	moco_RNFL_q1_all	0.0126404	0.0156129	0.418165	1
SLC25A16	Cross-ancestry	Brain_Hypothalamus	moco_RNFL_q3_all	-0.0157692	0.0158955	0.321174	1
SLC25A16	Cross-ancestry	Brain_Hypothalamus	moco_RNFL_q5_all	-0.0160195	0.0156503	0.306031	1
SLC25A16	Cross-ancestry	Brain_Hypothalamus	moco_RNFL_q7_all	0.0272831	0.01596	0.0873634	1
SLC25A16	Cross-ancestry	Brain_Hypothalamus	moco_RNFL_q9_all	0.0142673	0.0157541	0.365134	1
SLC25A16	Cross-ancestry	Brain_Nucleus_accumbens_basal_ganglia	auto_GCC_q0_all	-0.0102622	0.015997	0.521194	1
SLC25A16	Cross-ancestry	Brain_Nucleus_accumbens_basal_ganglia	auto_GCC_q10_all	-0.0451537	0.0168089	0.00722495	1
SLC25A16	Cross-ancestry	Brain_Nucleus_accumbens_basal_ganglia	auto_GCC_q2_all	-0.0456668	0.0169531	0.00706614	1
SLC25A16	Cross-ancestry	Brain_Nucleus_accumbens_basal_ganglia	auto_GCC_q3_all	0.0011545	0.0159386	0.942256	1
SLC25A16	Cross-ancestry	Brain_Nucleus_accumbens_basal_ganglia	auto_GCC_q4_all	-0.0336087	0.0165621	0.0424322	1
SLC25A16	Cross-ancestry	Brain_Nucleus_accumbens_basal_ganglia	auto_GCC_q6_all	0.0187285	0.0161343	0.245726	1
SLC25A16	Cross-ancestry	Brain_Nucleus_accumbens_basal_ganglia	auto_GCC_q8_all	-0.0187285	0.0162607	0.249418	1
SLC25A16	Cross-ancestry	Brain_Nucleus_accumbens_basal_ganglia	auto_RNFL_q0_all	-0.00256555	0.0158135	0.871119	1
SLC25A16	Cross-ancestry	Brain_Nucleus_accumbens_basal_ganglia	auto_RNFL_q1_all	0.0210375	0.0159332	0.186716	1
SLC25A16	Cross-ancestry	Brain_Nucleus_accumbens_basal_ganglia	auto_RNFL_q3_all	-0.0301452	0.016566	0.0688048	1
SLC25A16	Cross-ancestry	Brain_Nucleus_accumbens_basal_ganglia	auto_RNFL_q4_all	0.0329673	0.0164156	0.044612	1
SLC25A16	Cross-ancestry	Brain_Nucleus_accumbens_basal_ganglia	auto_RNFL_q6_all	0.046693	0.0171224	0.0063909	1
SLC25A16	Cross-ancestry	Brain_Nucleus_accumbens_basal_ganglia	auto_RNFL_q7_all	0.00872287	0.016236	0.591092	1
SLC25A16	Cross-ancestry	Brain_Nucleus_accumbens_basal_ganglia	auto_RNFL_q8_all	-0.0228334	0.0163547	0.162673	1
SLC25A16	Cross-ancestry	Brain_Nucleus_accumbens_basal_ganglia	moco_GCC_q3_all	-0.0319411	0.0166264	0.0547179	1
SLC25A16	Cross-ancestry	Brain_Nucleus_accumbens_basal_ganglia	moco_GCC_q8_all	-0.00859459	0.0162348	0.596532	1
SLC25A16	Cross-ancestry	Brain_Nucleus_accumbens_basal_ganglia	moco_RNFL_q1_all	0.0132126	0.0160359	0.409974	1
SLC25A16	Cross-ancestry	Brain_Nucleus_accumbens_basal_ganglia	moco_RNFL_q3_all	-0.0164195	0.0163427	0.315041	1
SLC25A16	Cross-ancestry	Brain_Nucleus_accumbens_basal_ganglia	moco_RNFL_q5_all	-0.0155216	0.016073	0.334198	1
SLC25A16	Cross-ancestry	Brain_Nucleus_accumbens_basal_ganglia	moco_RNFL_q7_all	0.0284776	0.016513	0.0846066	1
SLC25A16	Cross-ancestry	Brain_Nucleus_accumbens_basal_ganglia	moco_RNFL_q9_all	0.0157781	0.0162044	0.330209	1
SLC25A16	Cross-ancestry	Brain_Putamen_basal_ganglia	auto_GCC_q0_all	-0.00544684	0.0125624	0.664592	1
SLC25A16	Cross-ancestry	Brain_Putamen_basal_ganglia	auto_GCC_q10_all	-0.0356062	0.0129806	0.00608766	1
SLC25A16	Cross-ancestry	Brain_Putamen_basal_ganglia	auto_GCC_q2_all	-0.0356062	0.0130763	0.00647009	1
SLC25A16	Cross-ancestry	Brain_Putamen_basal_ganglia	auto_GCC_q3_all	0.00403469	0.0126562	0.749884	1
SLC25A16	Cross-ancestry	Brain_Putamen_basal_ganglia	auto_GCC_q4_all	-0.0287472	0.012958	0.0265215	1
SLC25A16	Cross-ancestry	Brain_Putamen_basal_ganglia	auto_GCC_q6_all	0.015937	0.0126751	0.208625	1
SLC25A16	Cross-ancestry	Brain_Putamen_basal_ganglia	auto_GCC_q8_all	-0.0175509	0.0128014	0.170369	1
SLC25A16	Cross-ancestry	Brain_Putamen_basal_ganglia	auto_RNFL_q0_all	-0.00443816	0.0124569	0.721631	1
SLC25A16	Cross-ancestry	Brain_Putamen_basal_ganglia	auto_RNFL_q1_all	0.0198709	0.0125474	0.113269	1
SLC25A16	Cross-ancestry	Brain_Putamen_basal_ganglia	auto_RNFL_q3_all	-0.0242082	0.0129382	0.0613371	1
SLC25A16	Cross-ancestry	Brain_Putamen_basal_ganglia	auto_RNFL_q4_all	0.0291507	0.0128722	0.0235356	1
SLC25A16	Cross-ancestry	Brain_Putamen_basal_ganglia	auto_RNFL_q6_all	0.0377244	0.0132465	0.00440132	1
SLC25A16	Cross-ancestry	Brain_Putamen_basal_ganglia	auto_RNFL_q7_all	0.00857373	0.0126848	0.4991	1
SLC25A16	Cross-ancestry	Brain_Putamen_basal_ganglia	auto_RNFL_q8_all	-0.0191648	0.0128307	0.135262	1
SLC25A16	Cross-ancestry	Brain_Putamen_basal_ganglia	moco_GCC_q3_all	-0.0254186	0.0129676	0.0499772	1
SLC25A16	Cross-ancestry	Brain_Putamen_basal_ganglia	moco_GCC_q8_all	-0.00423643	0.0127575	0.739833	1
SLC25A16	Cross-ancestry	Brain_Putamen_basal_ganglia	moco_RNFL_q1_all	0.0124067	0.0126249	0.325749	1
SLC25A16	Cross-ancestry	Brain_Putamen_basal_ganglia	moco_RNFL_q3_all	-0.0135162	0.012839	0.292458	1
SLC25A16	Cross-ancestry	Brain_Putamen_basal_ganglia	moco_RNFL_q5_all	-0.0147266	0.0126565	0.244601	1
SLC25A16	Cross-ancestry	Brain_Putamen_basal_ganglia	moco_RNFL_q7_all	0.0247125	0.0129503	0.056358	1
SLC25A16	Cross-ancestry	Brain_Putamen_basal_ganglia	moco_RNFL_q9_all	0.0119023	0.0127188	0.349371	1
SLC25A16	Cross-ancestry	Brain_Spinal_cord_cervical_c-1	auto_GCC_q0_all	-0.00565707	0.0159049	0.72208	1
SLC25A16	Cross-ancestry	Brain_Spinal_cord_cervical_c-1	auto_GCC_q10_all	-0.0502851	0.0182283	0.00580437	1
SLC25A16	Cross-ancestry	Brain_Spinal_cord_cervical_c-1	auto_GCC_q2_all	-0.0487765	0.0182003	0.00736264	1
SLC25A16	Cross-ancestry	Brain_Spinal_cord_cervical_c-1	auto_GCC_q3_all	0.00779418	0.01606	0.627452	1
SLC25A16	Cross-ancestry	Brain_Spinal_cord_cervical_c-1	auto_GCC_q4_all	-0.0395995	0.0174414	0.0231812	1
SLC25A16	Cross-ancestry	Brain_Spinal_cord_cervical_c-1	auto_GCC_q6_all	0.0159655	0.0162604	0.326165	1
SLC25A16	Cross-ancestry	Brain_Spinal_cord_cervical_c-1	auto_GCC_q8_all	-0.0256454	0.0166683	0.12391	1
SLC25A16	Cross-ancestry	Brain_Spinal_cord_cervical_c-1	auto_RNFL_q0_all	-0.00628563	0.0159128	0.692839	1
SLC25A16	Cross-ancestry	Brain_Spinal_cord_cervical_c-1	auto_RNFL_q1_all	0.0271539	0.016628	0.102465	1
SLC25A16	Cross-ancestry	Brain_Spinal_cord_cervical_c-1	auto_RNFL_q3_all	-0.0306739	0.0169493	0.0703358	1
SLC25A16	Cross-ancestry	Brain_Spinal_cord_cervical_c-1	auto_RNFL_q4_all	0.0397252	0.0174509	0.0228221	1
SLC25A16	Cross-ancestry	Brain_Spinal_cord_cervical_c-1	auto_RNFL_q6_all	0.0501593	0.018434	0.00650807	1
SLC25A16	Cross-ancestry	Brain_Spinal_cord_cervical_c-1	auto_RNFL_q7_all	0.013577	0.0163118	0.405218	1
SLC25A16	Cross-ancestry	Brain_Spinal_cord_cervical_c-1	auto_RNFL_q8_all	-0.0263997	0.0167076	0.114084	1
SLC25A16	Cross-ancestry	Brain_Spinal_cord_cervical_c-1	moco_GCC_q3_all	-0.034571	0.0171977	0.0444086	1
SLC25A16	Cross-ancestry	Brain_Spinal_cord_cervical_c-1	moco_GCC_q8_all	-0.00276568	0.0161302	0.863862	1
SLC25A16	Cross-ancestry	Brain_Spinal_cord_cervical_c-1	moco_RNFL_q1_all	0.0216226	0.016477	0.189423	1
SLC25A16	Cross-ancestry	Brain_Spinal_cord_cervical_c-1	moco_RNFL_q3_all	-0.0155884	0.0163717	0.341019	1
SLC25A16	Cross-ancestry	Brain_Spinal_cord_cervical_c-1	moco_RNFL_q5_all	-0.0214969	0.0164715	0.191861	1
SLC25A16	Cross-ancestry	Brain_Spinal_cord_cervical_c-1	moco_RNFL_q7_all	0.034571	0.0173144	0.0458625	1
SLC25A16	Cross-ancestry	Brain_Spinal_cord_cervical_c-1	moco_RNFL_q9_all	0.019234	0.0165005	0.24375	1
SLC25A16	Cross-ancestry	Brain_Substantia_nigra	auto_GCC_q0_all	-0.00868129	0.0219439	0.692391	1
SLC25A16	Cross-ancestry	Brain_Substantia_nigra	auto_GCC_q10_all	-0.0692767	0.0244038	0.00452884	1
SLC25A16	Cross-ancestry	Brain_Substantia_nigra	auto_GCC_q2_all	-0.065457	0.0242872	0.00703628	1
SLC25A16	Cross-ancestry	Brain_Substantia_nigra	auto_GCC_q3_all	0.00954942	0.0221262	0.666041	1
SLC25A16	Cross-ancestry	Brain_Substantia_nigra	auto_GCC_q4_all	-0.0546922	0.0237531	0.0213052	1
SLC25A16	Cross-ancestry	Brain_Substantia_nigra	auto_GCC_q6_all	0.0206615	0.0224922	0.358301	1
SLC25A16	Cross-ancestry	Brain_Substantia_nigra	auto_GCC_q8_all	-0.0340307	0.0229067	0.137379	1
SLC25A16	Cross-ancestry	Brain_Substantia_nigra	auto_RNFL_q0_all	-0.00902855	0.0221206	0.683163	1
SLC25A16	Cross-ancestry	Brain_Substantia_nigra	auto_RNFL_q1_all	0.0359406	0.022646	0.112499	1
SLC25A16	Cross-ancestry	Brain_Substantia_nigra	auto_RNFL_q3_all	-0.041323	0.0232133	0.0750531	1
SLC25A16	Cross-ancestry	Brain_Substantia_nigra	auto_RNFL_q4_all	0.0548658	0.0236023	0.0200938	1
SLC25A16	Cross-ancestry	Brain_Substantia_nigra	auto_RNFL_q6_all	0.0685822	0.0246632	0.00542342	1
SLC25A16	Cross-ancestry	Brain_Substantia_nigra	auto_RNFL_q7_all	0.0218769	0.0225217	0.331366	1
SLC25A16	Cross-ancestry	Brain_Substantia_nigra	auto_RNFL_q8_all	-0.0350724	0.0229471	0.126412	1
SLC25A16	Cross-ancestry	Brain_Substantia_nigra	moco_GCC_q3_all	-0.0494834	0.0236205	0.0361772	1
SLC25A16	Cross-ancestry	Brain_Substantia_nigra	moco_GCC_q8_all	-0.00607691	0.022268	0.784931	1
SLC25A16	Cross-ancestry	Brain_Substantia_nigra	moco_RNFL_q1_all	0.0279538	0.0225241	0.214583	1
SLC25A16	Cross-ancestry	Brain_Substantia_nigra	moco_RNFL_q3_all	-0.0187516	0.0224491	0.403552	1
SLC25A16	Cross-ancestry	Brain_Substantia_nigra	moco_RNFL_q5_all	-0.0250021	0.0224346	0.265089	1
SLC25A16	Cross-ancestry	Brain_Substantia_nigra	moco_RNFL_q7_all	0.0463581	0.0234568	0.0481185	1
SLC25A16	Cross-ancestry	Brain_Substantia_nigra	moco_RNFL_q9_all	0.0274329	0.0226777	0.2264	1
SLC25A16	Cross-ancestry	Nerve_Tibial	auto_GCC_q0_all	-0.0329534	0.0416856	0.429223	1
SLC25A16	Cross-ancestry	Nerve_Tibial	auto_GCC_q10_all	-0.143444	0.0467811	0.00216738	1
SLC25A16	Cross-ancestry	Nerve_Tibial	auto_GCC_q2_all	-0.127614	0.0459346	0.00546677	1
SLC25A16	Cross-ancestry	Nerve_Tibial	auto_GCC_q3_all	0.00775374	0.041706	0.852512	1
SLC25A16	Cross-ancestry	Nerve_Tibial	auto_GCC_q4_all	-0.100476	0.0445555	0.0241293	1
SLC25A16	Cross-ancestry	Nerve_Tibial	auto_GCC_q6_all	0.0397379	0.0424692	0.349434	1
SLC25A16	Cross-ancestry	Nerve_Tibial	auto_GCC_q8_all	-0.0587992	0.0430074	0.171566	1
SLC25A16	Cross-ancestry	Nerve_Tibial	auto_RNFL_q0_all	-0.0365072	0.0420781	0.38561	1
SLC25A16	Cross-ancestry	Nerve_Tibial	auto_RNFL_q1_all	0.075922	0.0430382	0.0777212	1
SLC25A16	Cross-ancestry	Nerve_Tibial	auto_RNFL_q3_all	-0.0633222	0.0428501	0.139472	1
SLC25A16	Cross-ancestry	Nerve_Tibial	auto_RNFL_q4_all	0.106614	0.0446039	0.0168374	1
SLC25A16	Cross-ancestry	Nerve_Tibial	auto_RNFL_q6_all	0.117598	0.0455704	0.00986317	1
SLC25A16	Cross-ancestry	Nerve_Tibial	auto_RNFL_q7_all	0.0352149	0.0423713	0.405916	1
SLC25A16	Cross-ancestry	Nerve_Tibial	auto_RNFL_q8_all	-0.0646145	0.0432113	0.134832	1
SLC25A16	Cross-ancestry	Nerve_Tibial	moco_GCC_q3_all	-0.0869065	0.0441582	0.04906	1
SLC25A16	Cross-ancestry	Nerve_Tibial	moco_GCC_q8_all	-0.00387687	0.0420157	0.926482	1
SLC25A16	Cross-ancestry	Nerve_Tibial	moco_RNFL_q1_all	0.0281073	0.0419198	0.502538	1
SLC25A16	Cross-ancestry	Nerve_Tibial	moco_RNFL_q3_all	-0.053307	0.0431486	0.216671	1
SLC25A16	Cross-ancestry	Nerve_Tibial	moco_RNFL_q5_all	-0.0474917	0.0423458	0.262066	1
SLC25A16	Cross-ancestry	Nerve_Tibial	moco_RNFL_q7_all	0.0794758	0.043814	0.0696874	1
SLC25A16	Cross-ancestry	Nerve_Tibial	moco_RNFL_q9_all	0.0239074	0.0421776	0.570833	1
RSPO2	Cross-ancestry	Nerve_Tibial	auto_GCC_q0_all	-0.0282666	0.0235057	0.229154	1
RSPO2	Cross-ancestry	Nerve_Tibial	auto_GCC_q10_all	0.0308658	0.0232672	0.184648	1
RSPO2	Cross-ancestry	Nerve_Tibial	auto_GCC_q2_all	0.0532841	0.0245358	0.0298794	1
RSPO2	Cross-ancestry	Nerve_Tibial	auto_GCC_q3_all	-0.023393	0.0236962	0.323541	1
RSPO2	Cross-ancestry	Nerve_Tibial	auto_GCC_q4_all	0.0666052	0.025313	0.00850676	1
RSPO2	Cross-ancestry	Nerve_Tibial	auto_GCC_q6_all	-0.0458113	0.0244773	0.0612646	1
RSPO2	Cross-ancestry	Nerve_Tibial	auto_GCC_q8_all	0.0633561	0.0254087	0.0126496	1
RSPO2	Cross-ancestry	Nerve_Tibial	auto_RNFL_q0_all	0.0627063	0.0250702	0.0123765	1
RSPO2	Cross-ancestry	Nerve_Tibial	auto_RNFL_q1_all	-0.130936	0.0308058	2.13423e-05	1
RSPO2	Cross-ancestry	Nerve_Tibial	auto_RNFL_q3_all	0.105918	0.028642	0.00021729	1
RSPO2	Cross-ancestry	Nerve_Tibial	auto_RNFL_q4_all	-0.0828503	0.0264507	0.0017347	1
RSPO2	Cross-ancestry	Nerve_Tibial	auto_RNFL_q6_all	-0.0964962	0.0278226	0.000523835	1
RSPO2	Cross-ancestry	Nerve_Tibial	auto_RNFL_q7_all	0.0896733	0.0272633	0.00100488	1
RSPO2	Cross-ancestry	Nerve_Tibial	auto_RNFL_q8_all	0.0919476	0.0274465	0.000807905	1
RSPO2	Cross-ancestry	Nerve_Tibial	moco_GCC_q3_all	0.0688795	0.0257549	0.00748588	1
RSPO2	Cross-ancestry	Nerve_Tibial	moco_GCC_q8_all	0.0110467	0.0234775	0.637982	1
RSPO2	Cross-ancestry	Nerve_Tibial	moco_RNFL_q1_all	-0.0812258	0.0263282	0.00203467	1
RSPO2	Cross-ancestry	Nerve_Tibial	moco_RNFL_q3_all	0.0373639	0.0241267	0.121465	1
RSPO2	Cross-ancestry	Nerve_Tibial	moco_RNFL_q5_all	0.0698542	0.0258185	0.00681845	1
RSPO2	Cross-ancestry	Nerve_Tibial	moco_RNFL_q7_all	-0.0565332	0.0250152	0.023824	1
RSPO2	Cross-ancestry	Nerve_Tibial	moco_RNFL_q9_all	-0.0695293	0.0257972	0.0070342	1
PBLD	Cross-ancestry	Artery_Aorta	auto_GCC_q0_all	0.0248861	0.0210257	0.236569	1
PBLD	Cross-ancestry	Artery_Aorta	auto_GCC_q10_all	-0.0629197	0.0213656	0.0032305	1
PBLD	Cross-ancestry	Artery_Aorta	auto_GCC_q2_all	-0.0852233	0.0221393	0.000118406	1
PBLD	Cross-ancestry	Artery_Aorta	auto_GCC_q3_all	0.0392074	0.0214147	0.0671205	1
PBLD	Cross-ancestry	Artery_Aorta	auto_GCC_q4_all	-0.0871015	0.0221922	8.67752e-05	1
PBLD	Cross-ancestry	Artery_Aorta	auto_GCC_q6_all	0.0413204	0.0214434	0.0539858	1
PBLD	Cross-ancestry	Artery_Aorta	auto_GCC_q8_all	-0.0765366	0.0221326	0.000543998	1
PBLD	Cross-ancestry	Artery_Aorta	auto_RNFL_q0_all	0.00493027	0.0209231	0.813714	1
PBLD	Cross-ancestry	Artery_Aorta	auto_RNFL_q1_all	0.0760671	0.0216728	0.000448448	1
PBLD	Cross-ancestry	Artery_Aorta	auto_RNFL_q3_all	-0.131709	0.023937	3.74863e-08	1
PBLD	Cross-ancestry	Artery_Aorta	auto_RNFL_q4_all	0.0828755	0.0218527	0.000149158	1
PBLD	Cross-ancestry	Artery_Aorta	auto_RNFL_q6_all	0.150256	0.0245143	8.8264e-10	1
PBLD	Cross-ancestry	Artery_Aorta	auto_RNFL_q7_all	-0.0133822	0.021184	0.527576	1
PBLD	Cross-ancestry	Artery_Aorta	auto_RNFL_q8_all	-0.0852233	0.0223611	0.000138274	1
PBLD	Cross-ancestry	Artery_Aorta	moco_GCC_q3_all	-0.101658	0.0228525	8.65079e-06	1
PBLD	Cross-ancestry	Artery_Aorta	moco_GCC_q8_all	-0.0103301	0.0214059	0.629394	1
PBLD	Cross-ancestry	Artery_Aorta	moco_RNFL_q1_all	0.119266	0.0232491	2.89878e-07	1
PBLD	Cross-ancestry	Artery_Aorta	moco_RNFL_q3_all	-0.0316946	0.0213245	0.1372	1
PBLD	Cross-ancestry	Artery_Aorta	moco_RNFL_q5_all	-0.0871015	0.0221922	8.67752e-05	1
PBLD	Cross-ancestry	Artery_Aorta	moco_RNFL_q7_all	0.0706672	0.0219909	0.00131137	1
PBLD	Cross-ancestry	Artery_Aorta	moco_RNFL_q9_all	0.107762	0.023054	2.94944e-06	1
PBLD	Cross-ancestry	Artery_Coronary	auto_GCC_q0_all	0.0334666	0.0270836	0.216579	1
PBLD	Cross-ancestry	Artery_Coronary	auto_GCC_q10_all	-0.0916563	0.0300559	0.00229202	1
PBLD	Cross-ancestry	Artery_Coronary	auto_GCC_q2_all	-0.123012	0.0327883	0.000175632	1
PBLD	Cross-ancestry	Artery_Coronary	auto_GCC_q3_all	0.0533657	0.0281726	0.0581929	1
PBLD	Cross-ancestry	Artery_Coronary	auto_GCC_q4_all	-0.121806	0.0329158	0.000215139	1
PBLD	Cross-ancestry	Artery_Coronary	auto_GCC_q6_all	0.0542702	0.02793	0.0520071	1
PBLD	Cross-ancestry	Artery_Coronary	auto_GCC_q8_all	-0.105224	0.031678	0.000894827	1
PBLD	Cross-ancestry	Artery_Coronary	auto_RNFL_q0_all	-0.000904503	0.0265513	0.972824	1
PBLD	Cross-ancestry	Artery_Coronary	auto_RNFL_q1_all	0.110651	0.0316447	0.000471122	1
PBLD	Cross-ancestry	Artery_Coronary	auto_RNFL_q3_all	-0.180901	0.0392402	4.02516e-06	1
PBLD	Cross-ancestry	Artery_Coronary	auto_RNFL_q4_all	0.123615	0.0328461	0.000167574	1
PBLD	Cross-ancestry	Artery_Coronary	auto_RNFL_q6_all	0.209242	0.0426834	9.47785e-07	1
PBLD	Cross-ancestry	Artery_Coronary	auto_RNFL_q7_all	-0.0214066	0.027069	0.429052	1
PBLD	Cross-ancestry	Artery_Coronary	auto_RNFL_q8_all	-0.128741	0.0338211	0.00014093	1
PBLD	Cross-ancestry	Artery_Coronary	moco_GCC_q3_all	-0.139595	0.0349022	6.34497e-05	1
PBLD	Cross-ancestry	Artery_Coronary	moco_GCC_q8_all	-0.0195976	0.027034	0.4685	1
PBLD	Cross-ancestry	Artery_Coronary	moco_RNFL_q1_all	0.157986	0.0366292	1.60957e-05	1
PBLD	Cross-ancestry	Artery_Coronary	moco_RNFL_q3_all	-0.0569837	0.0283527	0.0444512	1
PBLD	Cross-ancestry	Artery_Coronary	moco_RNFL_q5_all	-0.124821	0.0332027	0.00017034	1
PBLD	Cross-ancestry	Artery_Coronary	moco_RNFL_q7_all	0.100701	0.0313008	0.00129443	1
PBLD	Cross-ancestry	Artery_Coronary	moco_RNFL_q9_all	0.145022	0.0354622	4.32349e-05	1
PBLD	Cross-ancestry	Artery_Tibial	auto_GCC_q0_all	0.0295731	0.0240606	0.219031	1
PBLD	Cross-ancestry	Artery_Tibial	auto_GCC_q10_all	-0.0717819	0.0243415	0.00318852	1
PBLD	Cross-ancestry	Artery_Tibial	auto_GCC_q2_all	-0.0962469	0.0251129	0.000126815	1
PBLD	Cross-ancestry	Artery_Tibial	auto_GCC_q3_all	0.0465104	0.0244908	0.0575516	1
PBLD	Cross-ancestry	Artery_Tibial	auto_GCC_q4_all	-0.100548	0.0252167	6.6808e-05	1
PBLD	Cross-ancestry	Artery_Tibial	auto_GCC_q6_all	0.0457038	0.0244814	0.0619184	1
PBLD	Cross-ancestry	Artery_Tibial	auto_GCC_q8_all	-0.0881815	0.0251877	0.000463565	1
PBLD	Cross-ancestry	Artery_Tibial	auto_RNFL_q0_all	0.00752769	0.0239555	0.753341	1
PBLD	Cross-ancestry	Artery_Tibial	auto_RNFL_q1_all	0.0865684	0.0246364	0.000441671	1
PBLD	Cross-ancestry	Artery_Tibial	auto_RNFL_q3_all	-0.153242	0.0270428	1.45617e-08	1
PBLD	Cross-ancestry	Artery_Tibial	auto_RNFL_q4_all	0.0946338	0.0248187	0.000137286	1
PBLD	Cross-ancestry	Artery_Tibial	auto_RNFL_q6_all	0.173943	0.027571	2.80967e-10	1
PBLD	Cross-ancestry	Artery_Tibial	auto_RNFL_q7_all	-0.0166685	0.0242522	0.491895	1
PBLD	Cross-ancestry	Artery_Tibial	auto_RNFL_q8_all	-0.0989354	0.0254329	0.000100224	1
PBLD	Cross-ancestry	Artery_Tibial	moco_GCC_q3_all	-0.117486	0.0259152	5.80251e-06	1
PBLD	Cross-ancestry	Artery_Tibial	moco_GCC_q8_all	-0.0120981	0.0245039	0.621503	1
PBLD	Cross-ancestry	Artery_Tibial	moco_RNFL_q1_all	0.137649	0.0262754	1.61703e-07	1
PBLD	Cross-ancestry	Artery_Tibial	moco_RNFL_q3_all	-0.0362942	0.024384	0.136634	1
PBLD	Cross-ancestry	Artery_Tibial	moco_RNFL_q5_all	-0.10028	0.0252101	6.95685e-05	1
PBLD	Cross-ancestry	Artery_Tibial	moco_RNFL_q7_all	0.0806538	0.0250316	0.00127264	1
PBLD	Cross-ancestry	Artery_Tibial	moco_RNFL_q9_all	0.124207	0.0261079	1.96053e-06	1
PBLD	Cross-ancestry	Brain_Amygdala	auto_GCC_q0_all	0.0187003	0.0153416	0.222873	1
PBLD	Cross-ancestry	Brain_Amygdala	auto_GCC_q10_all	-0.0453907	0.0160272	0.0046242	1
PBLD	Cross-ancestry	Brain_Amygdala	auto_GCC_q2_all	-0.060861	0.0169577	0.000331975	1
PBLD	Cross-ancestry	Brain_Amygdala	auto_GCC_q3_all	0.0294105	0.0157657	0.0621156	1
PBLD	Cross-ancestry	Brain_Amygdala	auto_GCC_q4_all	-0.063581	0.0171123	0.000202797	1
PBLD	Cross-ancestry	Brain_Amygdala	auto_GCC_q6_all	0.0289005	0.015751	0.0665309	1
PBLD	Cross-ancestry	Brain_Amygdala	auto_GCC_q8_all	-0.0557609	0.0168369	0.000926916	1
PBLD	Cross-ancestry	Brain_Amygdala	auto_RNFL_q0_all	0.00476008	0.0151749	0.753763	1
PBLD	Cross-ancestry	Brain_Amygdala	auto_RNFL_q1_all	0.0547409	0.0164754	0.000891902	1
PBLD	Cross-ancestry	Brain_Amygdala	auto_RNFL_q3_all	-0.0969015	0.0195248	6.94151e-07	1
PBLD	Cross-ancestry	Brain_Amygdala	auto_RNFL_q4_all	0.0598409	0.0167491	0.000353213	1
PBLD	Cross-ancestry	Brain_Amygdala	auto_RNFL_q6_all	0.109992	0.0204497	7.50468e-08	1
PBLD	Cross-ancestry	Brain_Amygdala	auto_RNFL_q7_all	-0.0105402	0.0153892	0.493402	1
PBLD	Cross-ancestry	Brain_Amygdala	auto_RNFL_q8_all	-0.062561	0.0172047	0.000276621	1
PBLD	Cross-ancestry	Brain_Amygdala	moco_GCC_q3_all	-0.0742912	0.017916	3.37402e-05	1
PBLD	Cross-ancestry	Brain_Amygdala	moco_GCC_q8_all	-0.00765012	0.0155319	0.622335	1
PBLD	Cross-ancestry	Brain_Amygdala	moco_RNFL_q1_all	0.0870414	0.01865	3.05471e-06	1
PBLD	Cross-ancestry	Brain_Amygdala	moco_RNFL_q3_all	-0.0229504	0.0155979	0.141189	1
PBLD	Cross-ancestry	Brain_Amygdala	moco_RNFL_q5_all	-0.063411	0.0171025	0.000209151	1
PBLD	Cross-ancestry	Brain_Amygdala	moco_RNFL_q7_all	0.0510008	0.0166004	0.00212445	1
PBLD	Cross-ancestry	Brain_Amygdala	moco_RNFL_q9_all	0.0785412	0.0181959	1.58582e-05	1
PBLD	Cross-ancestry	Brain_Anterior_cingulate_cortex_BA24	auto_GCC_q0_all	0.0272015	0.0218701	0.213582	1
PBLD	Cross-ancestry	Brain_Anterior_cingulate_cortex_BA24	auto_GCC_q10_all	-0.0744979	0.0233966	0.00145186	1
PBLD	Cross-ancestry	Brain_Anterior_cingulate_cortex_BA24	auto_GCC_q2_all	-0.0999841	0.0249198	6.01461e-05	1
PBLD	Cross-ancestry	Brain_Anterior_cingulate_cortex_BA24	auto_GCC_q3_all	0.0433754	0.022535	0.0542536	1
PBLD	Cross-ancestry	Brain_Anterior_cingulate_cortex_BA24	auto_GCC_q4_all	-0.0990038	0.0250655	7.82124e-05	1
PBLD	Cross-ancestry	Brain_Anterior_cingulate_cortex_BA24	auto_GCC_q6_all	0.0441106	0.0223217	0.0481402	1
PBLD	Cross-ancestry	Brain_Anterior_cingulate_cortex_BA24	auto_GCC_q8_all	-0.0855256	0.0244488	0.000468499	1
PBLD	Cross-ancestry	Brain_Anterior_cingulate_cortex_BA24	auto_RNFL_q0_all	-0.000735177	0.0215886	0.972834	1
PBLD	Cross-ancestry	Brain_Anterior_cingulate_cortex_BA24	auto_RNFL_q1_all	0.0899367	0.0242779	0.000211832	1
PBLD	Cross-ancestry	Brain_Anterior_cingulate_cortex_BA24	auto_RNFL_q3_all	-0.147035	0.0287029	3.01258e-07	1
PBLD	Cross-ancestry	Brain_Anterior_cingulate_cortex_BA24	auto_RNFL_q4_all	0.100474	0.0249524	5.65804e-05	1
PBLD	Cross-ancestry	Brain_Anterior_cingulate_cortex_BA24	auto_RNFL_q6_all	0.170071	0.0307368	3.14561e-08	1
PBLD	Cross-ancestry	Brain_Anterior_cingulate_cortex_BA24	auto_RNFL_q7_all	-0.0173992	0.0219476	0.427917	1
PBLD	Cross-ancestry	Brain_Anterior_cingulate_cortex_BA24	auto_RNFL_q8_all	-0.10464	0.0256496	4.51131e-05	1
PBLD	Cross-ancestry	Brain_Anterior_cingulate_cortex_BA24	moco_GCC_q3_all	-0.113462	0.026263	1.55868e-05	1
PBLD	Cross-ancestry	Brain_Anterior_cingulate_cortex_BA24	moco_GCC_q8_all	-0.0159288	0.0219291	0.467607	1
PBLD	Cross-ancestry	Brain_Anterior_cingulate_cortex_BA24	moco_RNFL_q1_all	0.128411	0.0271838	2.31467e-06	1
PBLD	Cross-ancestry	Brain_Anterior_cingulate_cortex_BA24	moco_RNFL_q3_all	-0.0463162	0.0226316	0.0407048	1
PBLD	Cross-ancestry	Brain_Anterior_cingulate_cortex_BA24	moco_RNFL_q5_all	-0.101454	0.0252271	5.77935e-05	1
PBLD	Cross-ancestry	Brain_Anterior_cingulate_cortex_BA24	moco_RNFL_q7_all	0.0818497	0.0242397	0.000733655	1
PBLD	Cross-ancestry	Brain_Anterior_cingulate_cortex_BA24	moco_RNFL_q9_all	0.117873	0.0265826	9.24026e-06	1
PBLD	Cross-ancestry	Brain_Caudate_basal_ganglia	auto_GCC_q0_all	0.0209059	0.0167924	0.213146	1
PBLD	Cross-ancestry	Brain_Caudate_basal_ganglia	auto_GCC_q10_all	-0.0522647	0.0173806	0.00263773	1
PBLD	Cross-ancestry	Brain_Caudate_basal_ganglia	auto_GCC_q2_all	-0.0692508	0.0182176	0.000143926	1
PBLD	Cross-ancestry	Brain_Caudate_basal_ganglia	auto_GCC_q3_all	0.0328521	0.0171923	0.0560216	1
PBLD	Cross-ancestry	Brain_Caudate_basal_ganglia	auto_GCC_q4_all	-0.0714907	0.0183163	9.49635e-05	1
PBLD	Cross-ancestry	Brain_Caudate_basal_ganglia	auto_GCC_q6_all	0.0311722	0.0171564	0.0692262	1
PBLD	Cross-ancestry	Brain_Caudate_basal_ganglia	auto_GCC_q8_all	-0.062531	0.0181102	0.000554782	1
PBLD	Cross-ancestry	Brain_Caudate_basal_ganglia	auto_RNFL_q0_all	0.00261324	0.0166451	0.875247	1
PBLD	Cross-ancestry	Brain_Caudate_basal_ganglia	auto_RNFL_q1_all	0.0614111	0.0177197	0.000528848	1
PBLD	Cross-ancestry	Brain_Caudate_basal_ganglia	auto_RNFL_q3_all	-0.107329	0.0203737	1.37882e-07	1
PBLD	Cross-ancestry	Brain_Caudate_basal_ganglia	auto_RNFL_q4_all	0.0681308	0.0179986	0.000153503	1
PBLD	Cross-ancestry	Brain_Caudate_basal_ganglia	auto_RNFL_q6_all	0.121889	0.0211436	8.17488e-09	1
PBLD	Cross-ancestry	Brain_Caudate_basal_ganglia	auto_RNFL_q7_all	-0.0130662	0.0168871	0.439085	1
PBLD	Cross-ancestry	Brain_Caudate_basal_ganglia	auto_RNFL_q8_all	-0.0731706	0.0185609	8.07393e-05	1
PBLD	Cross-ancestry	Brain_Caudate_basal_ganglia	moco_GCC_q3_all	-0.0853035	0.0191446	8.3603e-06	1
PBLD	Cross-ancestry	Brain_Caudate_basal_ganglia	moco_GCC_q8_all	-0.00895967	0.0170424	0.599078	1
PBLD	Cross-ancestry	Brain_Caudate_basal_ganglia	moco_RNFL_q1_all	0.0950098	0.0195017	1.10538e-06	1
PBLD	Cross-ancestry	Brain_Caudate_basal_ganglia	moco_RNFL_q3_all	-0.026319	0.0170631	0.122963	1
PBLD	Cross-ancestry	Brain_Caudate_basal_ganglia	moco_RNFL_q5_all	-0.0707441	0.0184529	0.000126196	1
PBLD	Cross-ancestry	Brain_Caudate_basal_ganglia	moco_RNFL_q7_all	0.0567446	0.0178907	0.00151534	1
PBLD	Cross-ancestry	Brain_Caudate_basal_ganglia	moco_RNFL_q9_all	0.0869835	0.019231	6.09417e-06	1
PBLD	Cross-ancestry	Brain_Cerebellar_Hemisphere	auto_GCC_q0_all	0.0224103	0.0181587	0.217152	1
PBLD	Cross-ancestry	Brain_Cerebellar_Hemisphere	auto_GCC_q10_all	-0.0560257	0.0195853	0.00422852	1
PBLD	Cross-ancestry	Brain_Cerebellar_Hemisphere	auto_GCC_q2_all	-0.074234	0.0211066	0.000436278	1
PBLD	Cross-ancestry	Brain_Cerebellar_Hemisphere	auto_GCC_q3_all	0.0352161	0.0188138	0.0612307	1
PBLD	Cross-ancestry	Brain_Cerebellar_Hemisphere	auto_GCC_q4_all	-0.0766351	0.021304	0.000321631	1
PBLD	Cross-ancestry	Brain_Cerebellar_Hemisphere	auto_GCC_q6_all	0.0334153	0.0187377	0.0745346	1
PBLD	Cross-ancestry	Brain_Cerebellar_Hemisphere	auto_GCC_q8_all	-0.0670307	0.0207156	0.0012132	1
PBLD	Cross-ancestry	Brain_Cerebellar_Hemisphere	auto_RNFL_q0_all	0.00280128	0.0178413	0.875236	1
PBLD	Cross-ancestry	Brain_Cerebellar_Hemisphere	auto_RNFL_q1_all	0.0658302	0.020278	0.00116881	1
PBLD	Cross-ancestry	Brain_Cerebellar_Hemisphere	auto_RNFL_q3_all	-0.115053	0.025124	4.66338e-06	1
PBLD	Cross-ancestry	Brain_Cerebellar_Hemisphere	auto_RNFL_q4_all	0.0730334	0.0208402	0.000457551	1
PBLD	Cross-ancestry	Brain_Cerebellar_Hemisphere	auto_RNFL_q6_all	0.13066	0.026696	9.86273e-07	1
PBLD	Cross-ancestry	Brain_Cerebellar_Hemisphere	auto_RNFL_q7_all	-0.0140064	0.0181612	0.440573	1
PBLD	Cross-ancestry	Brain_Cerebellar_Hemisphere	auto_RNFL_q8_all	-0.0784359	0.0216213	0.000285933	1
PBLD	Cross-ancestry	Brain_Cerebellar_Hemisphere	moco_GCC_q3_all	-0.0914419	0.0227715	5.92867e-05	1
PBLD	Cross-ancestry	Brain_Cerebellar_Hemisphere	moco_GCC_q8_all	-0.0096044	0.0182941	0.599584	1
PBLD	Cross-ancestry	Brain_Cerebellar_Hemisphere	moco_RNFL_q1_all	0.101847	0.0236189	1.61724e-05	1
PBLD	Cross-ancestry	Brain_Cerebellar_Hemisphere	moco_RNFL_q3_all	-0.0282129	0.0185389	0.128054	1
PBLD	Cross-ancestry	Brain_Cerebellar_Hemisphere	moco_RNFL_q5_all	-0.0758347	0.0214057	0.000396004	1
PBLD	Cross-ancestry	Brain_Cerebellar_Hemisphere	moco_RNFL_q7_all	0.0608279	0.0202684	0.00268988	1
PBLD	Cross-ancestry	Brain_Cerebellar_Hemisphere	moco_RNFL_q9_all	0.0932427	0.0229396	4.80943e-05	1
PBLD	Cross-ancestry	Brain_Cerebellum	auto_GCC_q0_all	0.0238437	0.0191897	0.214042	1
PBLD	Cross-ancestry	Brain_Cerebellum	auto_GCC_q10_all	-0.0653018	0.0206067	0.00152982	1
PBLD	Cross-ancestry	Brain_Cerebellum	auto_GCC_q2_all	-0.0876419	0.0220052	6.81165e-05	1
PBLD	Cross-ancestry	Brain_Cerebellum	auto_GCC_q3_all	0.0380211	0.0197917	0.0547237	1
PBLD	Cross-ancestry	Brain_Cerebellum	auto_GCC_q4_all	-0.0867826	0.022129	8.79364e-05	1
PBLD	Cross-ancestry	Brain_Cerebellum	auto_GCC_q6_all	0.0386655	0.0196063	0.0485982	1
PBLD	Cross-ancestry	Brain_Cerebellum	auto_GCC_q8_all	-0.0749682	0.0215529	0.000504537	1
PBLD	Cross-ancestry	Brain_Cerebellum	auto_RNFL_q0_all	-0.000644425	0.0189298	0.972843	1
PBLD	Cross-ancestry	Brain_Cerebellum	auto_RNFL_q1_all	0.0788347	0.0214163	0.000232263	1
PBLD	Cross-ancestry	Brain_Cerebellum	auto_RNFL_q3_all	-0.128885	0.0254573	4.13134e-07	1
PBLD	Cross-ancestry	Brain_Cerebellum	auto_RNFL_q4_all	0.0880715	0.0220351	6.41873e-05	1
PBLD	Cross-ancestry	Brain_Cerebellum	auto_RNFL_q6_all	0.149077	0.0273124	4.80953e-08	1
PBLD	Cross-ancestry	Brain_Cerebellum	auto_RNFL_q7_all	-0.0152514	0.0192498	0.428191	1
PBLD	Cross-ancestry	Brain_Cerebellum	auto_RNFL_q8_all	-0.0917232	0.0226548	5.14976e-05	1
PBLD	Cross-ancestry	Brain_Cerebellum	moco_GCC_q3_all	-0.0994563	0.023217	1.83752e-05	1
PBLD	Cross-ancestry	Brain_Cerebellum	moco_GCC_q8_all	-0.0139626	0.0192327	0.467851	1
PBLD	Cross-ancestry	Brain_Cerebellum	moco_RNFL_q1_all	0.11256	0.024069	2.91768e-06	1
PBLD	Cross-ancestry	Brain_Cerebellum	moco_RNFL_q3_all	-0.0405988	0.0198808	0.0411404	1
PBLD	Cross-ancestry	Brain_Cerebellum	moco_RNFL_q5_all	-0.0889307	0.0222772	6.55188e-05	1
PBLD	Cross-ancestry	Brain_Cerebellum	moco_RNFL_q7_all	0.071746	0.0213607	0.000782871	1
PBLD	Cross-ancestry	Brain_Cerebellum	moco_RNFL_q9_all	0.103323	0.0235097	1.1082e-05	1
PBLD	Cross-ancestry	Brain_Cortex	auto_GCC_q0_all	0.0226059	0.0181713	0.213484	1
PBLD	Cross-ancestry	Brain_Cortex	auto_GCC_q10_all	-0.0565147	0.0188981	0.00278526	1
PBLD	Cross-ancestry	Brain_Cortex	auto_GCC_q2_all	-0.074882	0.0198764	0.00016497	1
PBLD	Cross-ancestry	Brain_Cortex	auto_GCC_q3_all	0.0355235	0.0186292	0.0565371	1
PBLD	Cross-ancestry	Brain_Cortex	auto_GCC_q4_all	-0.0773041	0.0199941	0.00011048	1
PBLD	Cross-ancestry	Brain_Cortex	auto_GCC_q6_all	0.033707	0.0185862	0.0697471	1
PBLD	Cross-ancestry	Brain_Cortex	auto_GCC_q8_all	-0.0676158	0.0197277	0.000609277	1
PBLD	Cross-ancestry	Brain_Cortex	auto_RNFL_q0_all	0.00282574	0.0179942	0.875217	1
PBLD	Cross-ancestry	Brain_Cortex	auto_RNFL_q1_all	0.0664048	0.0193032	0.000581523	1
PBLD	Cross-ancestry	Brain_Cortex	auto_RNFL_q3_all	-0.116057	0.0224153	2.24784e-07	1
PBLD	Cross-ancestry	Brain_Cortex	auto_RNFL_q4_all	0.073671	0.019636	0.000175542	1
PBLD	Cross-ancestry	Brain_Cortex	auto_RNFL_q6_all	0.1318	0.0233415	1.63649e-08	1
PBLD	Cross-ancestry	Brain_Cortex	auto_RNFL_q7_all	-0.0141287	0.0182627	0.439145	1
PBLD	Cross-ancestry	Brain_Cortex	auto_RNFL_q8_all	-0.0791206	0.0202651	9.45056e-05	1
PBLD	Cross-ancestry	Brain_Cortex	moco_GCC_q3_all	-0.0922401	0.0209593	1.07797e-05	1
PBLD	Cross-ancestry	Brain_Cortex	moco_GCC_q8_all	-0.00968824	0.0184269	0.599052	1
PBLD	Cross-ancestry	Brain_Cortex	moco_RNFL_q1_all	0.102736	0.0214021	1.58462e-06	1
PBLD	Cross-ancestry	Brain_Cortex	moco_RNFL_q3_all	-0.0284592	0.0184741	0.123441	1
PBLD	Cross-ancestry	Brain_Cortex	moco_RNFL_q5_all	-0.0764967	0.0201364	0.000145327	1
PBLD	Cross-ancestry	Brain_Cortex	moco_RNFL_q7_all	0.0613589	0.0194656	0.00162065	1
PBLD	Cross-ancestry	Brain_Cortex	moco_RNFL_q9_all	0.0940567	0.0210618	7.97929e-06	1
PBLD	Cross-ancestry	Brain_Frontal_Cortex_BA9	auto_GCC_q0_all	0.0253069	0.0203495	0.213643	1
PBLD	Cross-ancestry	Brain_Frontal_Cortex_BA9	auto_GCC_q10_all	-0.0693089	0.0217658	0.00145106	1
PBLD	Cross-ancestry	Brain_Frontal_Cortex_BA9	auto_GCC_q2_all	-0.0930199	0.0231799	5.99631e-05	1
PBLD	Cross-ancestry	Brain_Frontal_Cortex_BA9	auto_GCC_q3_all	0.0403542	0.0209671	0.0542736	1
PBLD	Cross-ancestry	Brain_Frontal_Cortex_BA9	auto_GCC_q4_all	-0.0921079	0.0233156	7.79916e-05	1
PBLD	Cross-ancestry	Brain_Frontal_Cortex_BA9	auto_GCC_q6_all	0.0410382	0.0207687	0.0481585	1
PBLD	Cross-ancestry	Brain_Frontal_Cortex_BA9	auto_GCC_q8_all	-0.0795685	0.0227436	0.000467876	1
PBLD	Cross-ancestry	Brain_Frontal_Cortex_BA9	auto_RNFL_q0_all	-0.00068397	0.0200882	0.972839	1
PBLD	Cross-ancestry	Brain_Frontal_Cortex_BA9	auto_RNFL_q1_all	0.0836723	0.0225839	0.000211437	1
PBLD	Cross-ancestry	Brain_Frontal_Cortex_BA9	auto_RNFL_q3_all	-0.136794	0.026693	2.97984e-07	1
PBLD	Cross-ancestry	Brain_Frontal_Cortex_BA9	auto_RNFL_q4_all	0.0934758	0.0232102	5.64046e-05	1
PBLD	Cross-ancestry	Brain_Frontal_Cortex_BA9	auto_RNFL_q6_all	0.158225	0.0285817	3.09665e-08	1
PBLD	Cross-ancestry	Brain_Frontal_Cortex_BA9	auto_RNFL_q7_all	-0.0161873	0.0204219	0.427986	1
PBLD	Cross-ancestry	Brain_Frontal_Cortex_BA9	auto_RNFL_q8_all	-0.0973517	0.0238583	4.49577e-05	1
PBLD	Cross-ancestry	Brain_Frontal_Cortex_BA9	moco_GCC_q3_all	-0.105559	0.0244279	1.55136e-05	1
PBLD	Cross-ancestry	Brain_Frontal_Cortex_BA9	moco_GCC_q8_all	-0.0148193	0.0204048	0.467674	1
PBLD	Cross-ancestry	Brain_Frontal_Cortex_BA9	moco_RNFL_q1_all	0.119467	0.0252823	2.29768e-06	1
PBLD	Cross-ancestry	Brain_Frontal_Cortex_BA9	moco_RNFL_q3_all	-0.0430901	0.0210568	0.0407194	1
PBLD	Cross-ancestry	Brain_Frontal_Cortex_BA9	moco_RNFL_q5_all	-0.0943878	0.0234656	5.76124e-05	1
PBLD	Cross-ancestry	Brain_Frontal_Cortex_BA9	moco_RNFL_q7_all	0.0761486	0.0225494	0.000732904	1
PBLD	Cross-ancestry	Brain_Frontal_Cortex_BA9	moco_RNFL_q9_all	0.109663	0.0247246	9.19059e-06	1
PBLD	Cross-ancestry	Brain_Hippocampus	auto_GCC_q0_all	0.0291554	0.023624	0.217149	1
PBLD	Cross-ancestry	Brain_Hippocampus	auto_GCC_q10_all	-0.0798491	0.0263517	0.00244447	1
PBLD	Cross-ancestry	Brain_Hippocampus	auto_GCC_q2_all	-0.107166	0.0288375	0.00020224	1
PBLD	Cross-ancestry	Brain_Hippocampus	auto_GCC_q3_all	0.0464911	0.0246074	0.0588493	1
PBLD	Cross-ancestry	Brain_Hippocampus	auto_GCC_q4_all	-0.106115	0.0289423	0.000245948	1
PBLD	Cross-ancestry	Brain_Hippocampus	auto_GCC_q6_all	0.0472791	0.0243987	0.0526508	1
PBLD	Cross-ancestry	Brain_Hippocampus	auto_GCC_q8_all	-0.0916689	0.0278054	0.000977912	1
PBLD	Cross-ancestry	Brain_Hippocampus	auto_RNFL_q0_all	-0.000787985	0.0231362	0.97283	1
PBLD	Cross-ancestry	Brain_Hippocampus	auto_RNFL_q1_all	0.0963968	0.027798	0.000524826	1
PBLD	Cross-ancestry	Brain_Hippocampus	auto_RNFL_q3_all	-0.157597	0.0346733	5.48838e-06	1
PBLD	Cross-ancestry	Brain_Hippocampus	auto_RNFL_q4_all	0.107691	0.02889	0.000193287	1
PBLD	Cross-ancestry	Brain_Hippocampus	auto_RNFL_q6_all	0.182287	0.0377835	1.40341e-06	1
PBLD	Cross-ancestry	Brain_Hippocampus	auto_RNFL_q7_all	-0.018649	0.023597	0.429346	1
PBLD	Cross-ancestry	Brain_Hippocampus	auto_RNFL_q8_all	-0.112157	0.0297536	0.000163571	1
PBLD	Cross-ancestry	Brain_Hippocampus	moco_GCC_q3_all	-0.121612	0.030735	7.59588e-05	1
PBLD	Cross-ancestry	Brain_Hippocampus	moco_GCC_q8_all	-0.017073	0.0235649	0.468753	1
PBLD	Cross-ancestry	Brain_Hippocampus	moco_RNFL_q1_all	0.137635	0.0323106	2.04663e-05	1
PBLD	Cross-ancestry	Brain_Hippocampus	moco_RNFL_q3_all	-0.049643	0.0247721	0.0450714	1
PBLD	Cross-ancestry	Brain_Hippocampus	moco_RNFL_q5_all	-0.108742	0.0292029	0.000196353	1
PBLD	Cross-ancestry	Brain_Hippocampus	moco_RNFL_q7_all	0.087729	0.0274619	0.00140041	1
PBLD	Cross-ancestry	Brain_Hippocampus	moco_RNFL_q9_all	0.12634	0.0312429	5.25909e-05	1
PBLD	Cross-ancestry	Brain_Hypothalamus	auto_GCC_q0_all	0.0340013	0.0280957	0.226204	1
PBLD	Cross-ancestry	Brain_Hypothalamus	auto_GCC_q10_all	-0.0825304	0.0304441	0.00671042	1
PBLD	Cross-ancestry	Brain_Hypothalamus	auto_GCC_q2_all	-0.110659	0.033047	0.000812429	1
PBLD	Cross-ancestry	Brain_Hypothalamus	auto_GCC_q3_all	0.0534748	0.0292058	0.0671054	1
PBLD	Cross-ancestry	Brain_Hypothalamus	auto_GCC_q4_all	-0.115604	0.033506	0.000560054	1
PBLD	Cross-ancestry	Brain_Hypothalamus	auto_GCC_q6_all	0.0525475	0.0291598	0.071537	1
PBLD	Cross-ancestry	Brain_Hypothalamus	auto_GCC_q8_all	-0.101386	0.0324889	0.00180467	1
PBLD	Cross-ancestry	Brain_Hypothalamus	auto_RNFL_q0_all	0.00865488	0.0275654	0.753539	1
PBLD	Cross-ancestry	Brain_Hypothalamus	auto_RNFL_q1_all	0.0995311	0.0318016	0.00174954	1
PBLD	Cross-ancestry	Brain_Hypothalamus	auto_RNFL_q3_all	-0.176189	0.0402786	1.21852e-05	1
PBLD	Cross-ancestry	Brain_Hypothalamus	auto_RNFL_q4_all	0.108804	0.0326203	0.000851534	1
PBLD	Cross-ancestry	Brain_Hypothalamus	auto_RNFL_q6_all	0.199989	0.043008	3.31853e-06	1
PBLD	Cross-ancestry	Brain_Hypothalamus	auto_RNFL_q7_all	-0.0191644	0.0280167	0.493954	1
PBLD	Cross-ancestry	Brain_Hypothalamus	auto_RNFL_q8_all	-0.11375	0.0335879	0.000707557	1
PBLD	Cross-ancestry	Brain_Hypothalamus	moco_GCC_q3_all	-0.135078	0.0356795	0.000153172	1
PBLD	Cross-ancestry	Brain_Hypothalamus	moco_GCC_q8_all	-0.0139096	0.0282398	0.622328	1
PBLD	Cross-ancestry	Brain_Hypothalamus	moco_RNFL_q1_all	0.158261	0.0379681	3.06938e-05	1
PBLD	Cross-ancestry	Brain_Hypothalamus	moco_RNFL_q3_all	-0.0417289	0.0286784	0.145651	1
PBLD	Cross-ancestry	Brain_Hypothalamus	moco_RNFL_q5_all	-0.115295	0.033477	0.000573131	1
PBLD	Cross-ancestry	Brain_Hypothalamus	moco_RNFL_q7_all	0.0927308	0.0317752	0.003519	1
PBLD	Cross-ancestry	Brain_Hypothalamus	moco_RNFL_q9_all	0.142805	0.0364918	9.102e-05	1
PBLD	Cross-ancestry	Brain_Nucleus_accumbens_basal_ganglia	auto_GCC_q0_all	0.0235004	0.0188516	0.212546	1
PBLD	Cross-ancestry	Brain_Nucleus_accumbens_basal_ganglia	auto_GCC_q10_all	-0.058751	0.0194231	0.002488	1
PBLD	Cross-ancestry	Brain_Nucleus_accumbens_basal_ganglia	auto_GCC_q2_all	-0.077845	0.0202913	0.000124861	1
PBLD	Cross-ancestry	Brain_Nucleus_accumbens_basal_ganglia	auto_GCC_q3_all	0.0369292	0.0192761	0.0553904	1
PBLD	Cross-ancestry	Brain_Nucleus_accumbens_basal_ganglia	auto_GCC_q4_all	-0.0803629	0.0203914	8.11392e-05	1
PBLD	Cross-ancestry	Brain_Nucleus_accumbens_basal_ganglia	auto_GCC_q6_all	0.0350407	0.01924	0.0685695	1
PBLD	Cross-ancestry	Brain_Nucleus_accumbens_basal_ganglia	auto_GCC_q8_all	-0.0702913	0.0202032	0.000502865	1
PBLD	Cross-ancestry	Brain_Nucleus_accumbens_basal_ganglia	auto_RNFL_q0_all	0.00293755	0.0187035	0.875199	1
PBLD	Cross-ancestry	Brain_Nucleus_accumbens_basal_ganglia	auto_RNFL_q1_all	0.0690324	0.0197661	0.000478592	1
PBLD	Cross-ancestry	Brain_Nucleus_accumbens_basal_ganglia	auto_RNFL_q3_all	-0.120649	0.0225066	8.29398e-08	1
PBLD	Cross-ancestry	Brain_Nucleus_accumbens_basal_ganglia	auto_RNFL_q4_all	0.0765861	0.0200488	0.000133459	1
PBLD	Cross-ancestry	Brain_Nucleus_accumbens_basal_ganglia	auto_RNFL_q6_all	0.137016	0.0232769	3.94855e-09	1
PBLD	Cross-ancestry	Brain_Nucleus_accumbens_basal_ganglia	auto_RNFL_q7_all	-0.0146877	0.018969	0.438751	1
PBLD	Cross-ancestry	Brain_Nucleus_accumbens_basal_ganglia	auto_RNFL_q8_all	-0.0822513	0.02066	6.85695e-05	1
PBLD	Cross-ancestry	Brain_Nucleus_accumbens_basal_ganglia	moco_GCC_q3_all	-0.09589	0.0212531	6.42742e-06	1
PBLD	Cross-ancestry	Brain_Nucleus_accumbens_basal_ganglia	moco_GCC_q8_all	-0.0100716	0.0191473	0.598885	1
PBLD	Cross-ancestry	Brain_Nucleus_accumbens_basal_ganglia	moco_RNFL_q1_all	0.106801	0.0215972	7.60959e-07	1
PBLD	Cross-ancestry	Brain_Nucleus_accumbens_basal_ganglia	moco_RNFL_q3_all	-0.0295853	0.019146	0.122287	1
PBLD	Cross-ancestry	Brain_Nucleus_accumbens_basal_ganglia	moco_RNFL_q5_all	-0.0795236	0.0205504	0.000108975	1
PBLD	Cross-ancestry	Brain_Nucleus_accumbens_basal_ganglia	moco_RNFL_q7_all	0.0637868	0.0199811	0.00141118	1
PBLD	Cross-ancestry	Brain_Nucleus_accumbens_basal_ganglia	moco_RNFL_q9_all	0.0977784	0.0213409	4.61137e-06	1
PBLD	Cross-ancestry	Brain_Putamen_basal_ganglia	auto_GCC_q0_all	0.0194177	0.0155289	0.211145	1
PBLD	Cross-ancestry	Brain_Putamen_basal_ganglia	auto_GCC_q10_all	-0.0531801	0.0160115	0.000895785	1
PBLD	Cross-ancestry	Brain_Putamen_basal_ganglia	auto_GCC_q2_all	-0.0713733	0.0165949	1.70098e-05	1
PBLD	Cross-ancestry	Brain_Putamen_basal_ganglia	auto_GCC_q3_all	0.0309634	0.0158571	0.0508607	1
PBLD	Cross-ancestry	Brain_Putamen_basal_ganglia	auto_GCC_q4_all	-0.0706736	0.0167306	2.39779e-05	1
PBLD	Cross-ancestry	Brain_Putamen_basal_ganglia	auto_GCC_q6_all	0.0314882	0.0156942	0.0448171	1
PBLD	Cross-ancestry	Brain_Putamen_basal_ganglia	auto_GCC_q8_all	-0.0610522	0.0165738	0.000229907	1
PBLD	Cross-ancestry	Brain_Putamen_basal_ganglia	auto_RNFL_q0_all	-0.000524804	0.0154268	0.972862	1
PBLD	Cross-ancestry	Brain_Putamen_basal_ganglia	auto_RNFL_q1_all	0.064201	0.0163471	8.58855e-05	1
PBLD	Cross-ancestry	Brain_Putamen_basal_ganglia	auto_RNFL_q3_all	-0.104961	0.0181787	7.74942e-09	1
PBLD	Cross-ancestry	Brain_Putamen_basal_ganglia	auto_RNFL_q4_all	0.0717232	0.0166076	1.56952e-05	1
PBLD	Cross-ancestry	Brain_Putamen_basal_ganglia	auto_RNFL_q6_all	0.121405	0.0190188	1.73198e-10	1
PBLD	Cross-ancestry	Brain_Putamen_basal_ganglia	auto_RNFL_q7_all	-0.0124204	0.0156427	0.427194	1
PBLD	Cross-ancestry	Brain_Putamen_basal_ganglia	auto_RNFL_q8_all	-0.0746971	0.0170364	1.16224e-05	1
PBLD	Cross-ancestry	Brain_Putamen_basal_ganglia	moco_GCC_q3_all	-0.0809947	0.0172763	2.75621e-06	1
PBLD	Cross-ancestry	Brain_Putamen_basal_ganglia	moco_GCC_q8_all	-0.0113708	0.015636	0.467094	1
PBLD	Cross-ancestry	Brain_Putamen_basal_ganglia	moco_RNFL_q1_all	0.0916658	0.0175648	1.80158e-07	1
PBLD	Cross-ancestry	Brain_Putamen_basal_ganglia	moco_RNFL_q3_all	-0.0330627	0.0158926	0.0374912	1
PBLD	Cross-ancestry	Brain_Putamen_basal_ganglia	moco_RNFL_q5_all	-0.072423	0.0167933	1.61336e-05	1
PBLD	Cross-ancestry	Brain_Putamen_basal_ganglia	moco_RNFL_q7_all	0.0584282	0.0164942	0.000396579	1
PBLD	Cross-ancestry	Brain_Putamen_basal_ganglia	moco_RNFL_q9_all	0.0841436	0.0174022	1.32992e-06	1
PBLD	Cross-ancestry	Brain_Substantia_nigra	auto_GCC_q0_all	-0.0485125	0.0199039	0.014796	1
PBLD	Cross-ancestry	Brain_Substantia_nigra	auto_GCC_q10_all	0.0445069	0.0194793	0.0223229	1
PBLD	Cross-ancestry	Brain_Substantia_nigra	auto_GCC_q2_all	0.058304	0.0202977	0.00407317	1
PBLD	Cross-ancestry	Brain_Substantia_nigra	auto_GCC_q3_all	-0.0667603	0.0210818	0.00154162	1
PBLD	Cross-ancestry	Brain_Substantia_nigra	auto_GCC_q4_all	0.0947996	0.023418	5.16254e-05	1
PBLD	Cross-ancestry	Brain_Substantia_nigra	auto_GCC_q6_all	-0.00556336	0.0185166	0.763832	1
PBLD	Cross-ancestry	Brain_Substantia_nigra	auto_GCC_q8_all	0.0901264	0.0229907	8.85022e-05	1
PBLD	Cross-ancestry	Brain_Substantia_nigra	auto_RNFL_q0_all	-0.0140197	0.0186189	0.451463	1
PBLD	Cross-ancestry	Brain_Substantia_nigra	auto_RNFL_q1_all	-0.0623096	0.020569	0.0024513	1
PBLD	Cross-ancestry	Brain_Substantia_nigra	auto_RNFL_q3_all	0.126177	0.0265995	2.09967e-06	1
PBLD	Cross-ancestry	Brain_Substantia_nigra	auto_RNFL_q4_all	-0.0685406	0.021019	0.00111063	1
PBLD	Cross-ancestry	Brain_Substantia_nigra	auto_RNFL_q6_all	-0.126845	0.0266722	1.97785e-06	1
PBLD	Cross-ancestry	Brain_Substantia_nigra	auto_RNFL_q7_all	0.0371632	0.0193352	0.0545995	1
PBLD	Cross-ancestry	Brain_Substantia_nigra	auto_RNFL_q8_all	0.090794	0.0230509	8.18729e-05	1
PBLD	Cross-ancestry	Brain_Substantia_nigra	moco_GCC_q3_all	0.0910165	0.023071	7.97803e-05	1
PBLD	Cross-ancestry	Brain_Substantia_nigra	moco_GCC_q8_all	0.00511829	0.0187357	0.784712	1
PBLD	Cross-ancestry	Brain_Substantia_nigra	moco_RNFL_q1_all	-0.10014	0.0239228	2.83928e-05	1
PBLD	Cross-ancestry	Brain_Substantia_nigra	moco_RNFL_q3_all	0.0458421	0.0197581	0.020332	1
PBLD	Cross-ancestry	Brain_Substantia_nigra	moco_RNFL_q5_all	0.0945771	0.0233974	5.29504e-05	1
PBLD	Cross-ancestry	Brain_Substantia_nigra	moco_RNFL_q7_all	-0.0669828	0.0210979	0.00149914	1
PBLD	Cross-ancestry	Brain_Substantia_nigra	moco_RNFL_q9_all	-0.0727687	0.0215332	0.000726532	1
PBLD	Cross-ancestry	Nerve_Tibial	auto_GCC_q0_all	0.0290777	0.0245808	0.23683	1
PBLD	Cross-ancestry	Nerve_Tibial	auto_GCC_q10_all	-0.0751632	0.0251306	0.00278153	1
PBLD	Cross-ancestry	Nerve_Tibial	auto_GCC_q2_all	-0.100949	0.0258839	9.61622e-05	1
PBLD	Cross-ancestry	Nerve_Tibial	auto_GCC_q3_all	0.0460855	0.0250699	0.0660217	1
PBLD	Cross-ancestry	Nerve_Tibial	auto_GCC_q4_all	-0.102869	0.0262032	8.64295e-05	1
PBLD	Cross-ancestry	Nerve_Tibial	auto_GCC_q6_all	0.0499259	0.0251321	0.0469733	1
PBLD	Cross-ancestry	Nerve_Tibial	auto_GCC_q8_all	-0.0902507	0.0260664	0.000535491	1
PBLD	Cross-ancestry	Nerve_Tibial	auto_RNFL_q0_all	0.00356614	0.024437	0.883975	1
PBLD	Cross-ancestry	Nerve_Tibial	auto_RNFL_q1_all	0.0907994	0.0255638	0.000382495	1
PBLD	Cross-ancestry	Nerve_Tibial	auto_RNFL_q3_all	-0.153618	0.0284644	6.78211e-08	1
PBLD	Cross-ancestry	Nerve_Tibial	auto_RNFL_q4_all	0.0990289	0.025821	0.000125461	1
PBLD	Cross-ancestry	Nerve_Tibial	auto_RNFL_q6_all	0.176661	0.0293455	1.74366e-09	1
PBLD	Cross-ancestry	Nerve_Tibial	auto_RNFL_q7_all	-0.0153618	0.0247493	0.534798	1
PBLD	Cross-ancestry	Nerve_Tibial	auto_RNFL_q8_all	-0.100126	0.0263698	0.000146454	1
PBLD	Cross-ancestry	Nerve_Tibial	moco_GCC_q3_all	-0.120426	0.0270786	8.69698e-06	1
PBLD	Cross-ancestry	Nerve_Tibial	moco_GCC_q8_all	-0.0101498	0.0250004	0.684754	1
PBLD	Cross-ancestry	Nerve_Tibial	moco_RNFL_q1_all	0.139902	0.0276168	4.06589e-07	1
PBLD	Cross-ancestry	Nerve_Tibial	moco_RNFL_q3_all	-0.0386789	0.0249638	0.121285	1
PBLD	Cross-ancestry	Nerve_Tibial	moco_RNFL_q5_all	-0.103418	0.0262215	8.0126e-05	1
PBLD	Cross-ancestry	Nerve_Tibial	moco_RNFL_q7_all	0.0842157	0.0258949	0.0011451	1
PBLD	Cross-ancestry	Nerve_Tibial	moco_RNFL_q9_all	0.125638	0.0272783	4.10911e-06	1
RSPO2	EUR	Artery_Tibial	auto_GCC_q0_EUR	0.0164606	0.0246394	0.504094	1
RSPO2	EUR	Artery_Tibial	auto_GCC_q10_EUR	-0.0119714	0.0243043	0.622322	1
RSPO2	EUR	Artery_Tibial	auto_GCC_q2_EUR	-0.0302277	0.0248228	0.223323	1
RSPO2	EUR	Artery_Tibial	auto_GCC_q3_EUR	0.0224463	0.0250033	0.369328	1
RSPO2	EUR	Artery_Tibial	auto_GCC_q4_EUR	-0.0311255	0.0248384	0.210162	1
RSPO2	EUR	Artery_Tibial	auto_GCC_q6_EUR	0.022147	0.0249995	0.375673	1
RSPO2	EUR	Artery_Tibial	auto_GCC_q8_EUR	-0.040104	0.0253131	0.113121	1
RSPO2	EUR	Artery_Tibial	auto_RNFL_q0_EUR	-0.038009	0.0249733	0.128012	1
RSPO2	EUR	Artery_Tibial	auto_RNFL_q1_EUR	0.0559661	0.0254456	0.0278469	1
RSPO2	EUR	Artery_Tibial	auto_RNFL_q3_EUR	-0.0338191	0.0248881	0.174195	1
RSPO2	EUR	Artery_Tibial	auto_RNFL_q4_EUR	0.0362133	0.0249356	0.146425	1
RSPO2	EUR	Artery_Tibial	auto_RNFL_q6_EUR	0.0362133	0.0249356	0.146425	1
RSPO2	EUR	Artery_Tibial	auto_RNFL_q7_EUR	-0.0517761	0.0256103	0.0432085	1
RSPO2	EUR	Artery_Tibial	auto_RNFL_q8_EUR	-0.0404033	0.0250263	0.106433	1
RSPO2	EUR	Artery_Tibial	moco_GCC_q3_EUR	-0.00688353	0.0245752	0.779401	1
RSPO2	EUR	Artery_Tibial	moco_GCC_q8_EUR	0.0107742	0.024595	0.661338	1
RSPO2	EUR	Artery_Tibial	moco_RNFL_q1_EUR	0.0392062	0.0249994	0.116814	1
RSPO2	EUR	Artery_Tibial	moco_RNFL_q3_EUR	-0.0146649	0.0249216	0.556237	1
RSPO2	EUR	Artery_Tibial	moco_RNFL_q5_EUR	-0.0338191	0.0251832	0.179298	1
RSPO2	EUR	Artery_Tibial	moco_RNFL_q7_EUR	0.0493818	0.0255435	0.0532061	1
RSPO2	EUR	Artery_Tibial	moco_RNFL_q9_EUR	0.0125699	0.024607	0.609472	1
RSPO2	EUR	Nerve_Tibial	auto_GCC_q0_EUR	-0.0305409	0.0245292	0.213102	1
RSPO2	EUR	Nerve_Tibial	auto_GCC_q10_EUR	0.0438619	0.0250145	0.0795229	1
RSPO2	EUR	Nerve_Tibial	auto_GCC_q2_EUR	0.0646557	0.0263854	0.0142682	1
RSPO2	EUR	Nerve_Tibial	auto_GCC_q3_EUR	-0.0315156	0.0248773	0.205211	1
RSPO2	EUR	Nerve_Tibial	auto_GCC_q4_EUR	0.0802511	0.027116	0.00308089	1
RSPO2	EUR	Nerve_Tibial	auto_GCC_q6_EUR	-0.0415876	0.0255476	0.103557	1
RSPO2	EUR	Nerve_Tibial	auto_GCC_q8_EUR	0.0776519	0.0272222	0.00433744	1
RSPO2	EUR	Nerve_Tibial	auto_RNFL_q0_EUR	0.0711538	0.026788	0.00790299	1
RSPO2	EUR	Nerve_Tibial	auto_RNFL_q1_EUR	-0.143282	0.0330571	1.46164e-05	1
RSPO2	EUR	Nerve_Tibial	auto_RNFL_q3_EUR	0.111767	0.0296996	0.000167727	1
RSPO2	EUR	Nerve_Tibial	auto_RNFL_q4_EUR	-0.0955215	0.0285677	0.000826715	1
RSPO2	EUR	Nerve_Tibial	auto_RNFL_q6_EUR	-0.106893	0.0295287	0.000294636	1
RSPO2	EUR	Nerve_Tibial	auto_RNFL_q7_EUR	0.0883737	0.0280041	0.0016009	1
RSPO2	EUR	Nerve_Tibial	auto_RNFL_q8_EUR	0.0945468	0.0284889	0.000904303	1
RSPO2	EUR	Nerve_Tibial	moco_GCC_q3_EUR	0.0727783	0.0268936	0.00680669	1
RSPO2	EUR	Nerve_Tibial	moco_GCC_q8_EUR	0.0194942	0.0245765	0.427659	1
RSPO2	EUR	Nerve_Tibial	moco_RNFL_q1_EUR	-0.0886986	0.028029	0.00155333	1
RSPO2	EUR	Nerve_Tibial	moco_RNFL_q3_EUR	0.0393133	0.0251451	0.117945	1
RSPO2	EUR	Nerve_Tibial	moco_RNFL_q5_EUR	0.0753775	0.0270667	0.00535476	1
RSPO2	EUR	Nerve_Tibial	moco_RNFL_q7_EUR	-0.0568581	0.0259462	0.028424	1
RSPO2	EUR	Nerve_Tibial	moco_RNFL_q9_EUR	-0.0789515	0.0273127	0.00384451	1
NPLOC4	EUR	Artery_Aorta	auto_GCC_q0_EUR	0.13791	0.0313137	1.06194e-05	1
NPLOC4	EUR	Artery_Aorta	auto_GCC_q10_EUR	0.0353003	0.0266985	0.186108	1
NPLOC4	EUR	Artery_Aorta	auto_GCC_q2_EUR	0.0278214	0.0268615	0.300325	1
NPLOC4	EUR	Artery_Aorta	auto_GCC_q3_EUR	0.149877	0.0323769	3.67213e-06	1
NPLOC4	EUR	Artery_Aorta	auto_GCC_q4_EUR	-0.111884	0.0297088	0.000165867	1
NPLOC4	EUR	Artery_Aorta	auto_GCC_q6_EUR	-0.0652158	0.0281064	0.0203235	1
NPLOC4	EUR	Artery_Aorta	auto_GCC_q8_EUR	-0.130731	0.0311019	2.63055e-05	1
NPLOC4	EUR	Artery_Aorta	auto_RNFL_q0_EUR	0.0179493	0.0267345	0.501971	1
NPLOC4	EUR	Artery_Aorta	auto_RNFL_q1_EUR	-0.00688056	0.0266569	0.796318	1
NPLOC4	EUR	Artery_Aorta	auto_RNFL_q3_EUR	-0.0146586	0.026406	0.57881	1
NPLOC4	EUR	Artery_Aorta	auto_RNFL_q4_EUR	0.0358986	0.0270054	0.183745	1
NPLOC4	EUR	Artery_Aorta	auto_RNFL_q6_EUR	0.0562411	0.0275232	0.0410122	1
NPLOC4	EUR	Artery_Aorta	auto_RNFL_q7_EUR	0.055942	0.027514	0.0420307	1
NPLOC4	EUR	Artery_Aorta	auto_RNFL_q8_EUR	-0.0305138	0.0269055	0.256748	1
NPLOC4	EUR	Artery_Aorta	moco_GCC_q3_EUR	-0.0679082	0.0276316	0.0139859	1
NPLOC4	EUR	Artery_Aorta	moco_GCC_q8_EUR	-0.0284197	0.0268709	0.29022	1
NPLOC4	EUR	Artery_Aorta	moco_RNFL_q1_EUR	0.0224366	0.0264881	0.396971	1
NPLOC4	EUR	Artery_Aorta	moco_RNFL_q3_EUR	-0.0299155	0.0268954	0.266013	1
NPLOC4	EUR	Artery_Aorta	moco_RNFL_q5_EUR	-0.0341037	0.0269703	0.206055	1
NPLOC4	EUR	Artery_Aorta	moco_RNFL_q7_EUR	-0.00688056	0.0266569	0.796318	1
NPLOC4	EUR	Artery_Aorta	moco_RNFL_q9_EUR	0.0451724	0.0269217	0.0933631	1
NPLOC4	EUR	Artery_Tibial	auto_GCC_q0_EUR	0.189994	0.0416312	5.02509e-06	1
NPLOC4	EUR	Artery_Tibial	auto_GCC_q10_EUR	0.0437812	0.0370473	0.237298	1
NPLOC4	EUR	Artery_Tibial	auto_GCC_q2_EUR	0.04089	0.0374226	0.274546	1
NPLOC4	EUR	Artery_Tibial	auto_GCC_q3_EUR	0.21395	0.0431949	7.30309e-07	1
[truncated: 1,886 more rows]
